# Supplementary material for: Extrusion-modulated DnaA activity oscillations coordinate DNA replication with biomass growth
Source: eLife. 2025 Nov 18;14:RP107214. doi: 10.7554/eLife.107214 (PMC12626423; doi:10.7554/eLife.107214)
Supplement: Figure 2—source data 1. [file elife-107214-fig2-data1.xlsx]

## Sheet: Figure 2 B-F
Fig. 2B										Fig. 2C
		Relative dnaA mRNA level (normalized to wild-type MG1655, using rpoA as the reference)								Strain		growth rate (h-1)
	[aTc] ng·ml-1	replicate 1	replicate 2	replicate 3	replicate 4	replicate 5	Mean	SD			Rel. dnaA mRNA	replicate 1	replicate 2	replicate 3	replicate 4	replicate 5	Mean	SD
	0.75	0.22	0.18	0.24	0.28	0.26	0.236	0.0384708		RdnaA1	0.24	1.37	1.35	1.32	1.39	1.32	1.35	0.0308221
	1	0.26	0.3	0.39	0.43	0.32	0.34	0.0689202			0.34	1.37	1.38	1.32	1.34	1.34	1.35	0.0244949
	1.5	0.38	0.67	0.49	0.48	0.58	0.52	0.109772			0.52	1.33	1.38	1.33	1.37	1.37	1.356	0.0240832
	2	0.51	0.77	0.7	0.64	0.73	0.67	0.101242			0.67	1.37	1.34	1.33	1.35	1.38	1.354	0.0207364
	3	1	1.22	1.25	1.05	1.18	1.14	0.109316			1.14	1.35	1.32	1.32	1.35	1.33	1.334	0.0151658
	4	1.68	1.83	1.88	2.34	1.39	1.824	0.345876			1.82	1.33	1.36	1.3	1.33	1.36	1.336	0.0250998
	6	2.16	2.63	2.56	3.84	2.96	2.83	0.632218			2.83	1.34	1.34	1.3	1.3	1.32	1.32	0.02
	8	3.43	3.06	3.3	3.85	3.72	3.472	0.318387			3.47	1.31	1.34	1.32	1.3	1.32	1.318	0.0148324
	12	4.49	4.81		5.14	6.69	5.2825	0.975137			5.28	1.32	1.32	1.29	1.3	1.29	1.304	0.0151658
	20	6.25	6.84		8.6		7.23	1.22258			7.23	1.31	1.32	1.3	1.3	1.28	1.302	0.0148324
										MG1655	1	1.33	1.35	1.37	1.32	1.36	1.346	0.0207364
Fig. 2D										Fig. 2E
Strain		cellular mass (OD600 ml per 109 cells)								Strain		cellular oriC No.
	Rel. dnaA mRNA	replicate 1	replicate 2	replicate 3	replicate 4	replicate 5	Mean	SD			Rel. dnaA mRNA	replicate 1	replicate 2	replicate 3	replicate 4	replicate 5	Mean	SD
RdnaA1	0.24	1.7	1.47	1.65	1.59	1.58	1.598	0.0864292		RdnaA1	0.24	4.54	3.89	4.1604	4.1	4.1	4.15808	0.236898
	0.34	1.6	1.49	1.51	1.62	1.57	1.558	0.0563028			0.34	4.84	4.34	4.51354	4.47	4.34	4.50071	0.204866
	0.52	1.62	1.55	1.49	1.58	1.54	1.556	0.0482701			0.52	5.14	4.9	4.80092	4.67	4.85	4.87218	0.172444
	0.67	1.6	1.54	1.52	1.63	1.58	1.574	0.0444972			0.67	5.5	5.3	5.18449	4.98	5.23	5.2389	0.188398
	1.14	1.6	1.55	1.51	1.6	1.58	1.568	0.0383406			1.14	5.71	5.64	5.5626	5.4	5.57	5.57652	0.115371
	1.82	1.59	1.54	1.52	1.64	1.6	1.578	0.0481664			1.82	6.3	6.05	6.02678	5.94	5.89	6.04136	0.158403
	2.83	1.58	1.53	1.55	1.71	1.6	1.594	0.070214			2.83	7.37	6.67	6.6498	7.07	6.58	6.86796	0.340062
	3.47	1.59	1.57	1.59	1.63	1.59	1.594	0.0219089			3.47	7.64	7.27	7.28175	7.41	7.26	7.37235	0.161525
	5.28	1.59	1.54	1.57	1.57	1.64	1.582	0.0370135			5.28	8.17	8.08	8.01146	8.13	7.86	8.05029	0.121742
	7.23	1.63	1.52	1.59	1.59	1.63	1.592	0.0449444			7.23	8.74	8.76	8.7258	8.75	8.45	8.68516	0.132065
MG1655	1	1.56	1.64	1.5	1.55	1.51	1.552	0.0554076		MG1655	1	5.42	5.25	5.32854	5.16	5.21	5.27371	0.102419
Fig. 2F
Strain		initiation mass (10-10 OD600 ml)								Strain		C+D (h)
	Rel. dnaA mRNA	replicate 1	replicate 2	replicate 3	replicate 4	replicate 5	Mean	SD			Rel. dnaA mRNA	replicate 1	replicate 2	replicate 3	replicate 4	replicate 5	Mean	SD
RdnaA1	0.24	5.41	5.47	5.72	5.6	5.56	5.552	0.119875		RdnaA1	0.24	1.10433	1.00623	1.08001	1.0151	1.06893	1.05492	0.0424948
	0.34	4.76	4.94	4.84	5.24	5.22	5	0.219545			0.34	1.15103	1.06368	1.14173	1.11745	1.09543	1.11386	0.0354593
	0.52	4.55	4.57	4.46	4.88	4.58	4.608	0.15928			0.52	1.23087	1.15162	1.17955	1.12493	1.15254	1.1679	0.040149
	0.67	4.21	4.18	4.23	4.71	4.35	4.336	0.218815			0.67	1.24434	1.24456	1.23735	1.18921	1.19885	1.22286	0.0266981
	1.14	4.05	3.96	3.91	4.28	4.08	4.056	0.142583			1.14	1.29053	1.31052	1.30005	1.24918	1.29127	1.28831	0.0233214
	1.82	3.64	3.68	3.64	3.99	3.93	3.776	0.170088			1.82	1.38387	1.32357	1.3817	1.33963	1.30386	1.34653	0.0354489
	2.83	3.09	3.32	3.36	3.5	3.51	3.356	0.170675			2.83	1.49061	1.41613	1.45737	1.50451	1.4273	1.45919	0.0384548
	3.47	3.01	3.12	3.14	3.18	3.17	3.124	0.0680441			3.47	1.55221	1.48042	1.50407	1.54064	1.5018	1.51583	0.0297002
	5.28	2.81	2.75	2.83	2.79	3.01	2.838	0.100598			5.28	1.59126	1.58287	1.61308	1.61197	1.59828	1.59949	0.0130929
	7.23	2.69	2.5	2.62	2.62	2.78	2.642	0.103053			7.23	1.65489	1.64409	1.66637	1.6685	1.66732	1.66023	0.0105529
MG1655	1	4.14	4.51	4.06	4.35	4.19	4.25	0.179861		MG1655	1	1.27075	1.22832	1.22122	1.24313	1.21366	1.23542	0.0225445

## Sheet: Figure 2G
Fig. 2G	experimental data
Strain		initiation mass normalized to wild-type MG1655
	Rel. dnaA mRNA	replicate 1	replicate 2	replicate 3	replicate 4	replicate 5	Mean	SD
RdnaA1	0.24	1.31	1.21	1.41	1.29	1.33	1.31	0.072111
	0.34	1.15	1.1	1.19	1.2	1.25	1.178	0.0563028
	0.52	1.1	1.01	1.1	1.12	1.09	1.084	0.0427785
	0.67	1.02	0.93	1.04	1.08	1.04	1.022	0.055857
	1.14	0.98	0.88	0.96	0.98	0.97	0.954	0.04219
	1.82	0.88	0.82	0.9	0.92	0.94	0.892	0.0460435
	2.83	0.75	0.74	0.83	0.8	0.84	0.792	0.0454973
	3.47	0.73	0.69	0.77	0.73	0.76	0.736	0.031305
	5.28	0.68	0.61	0.7	0.64	0.72	0.67	0.0447214
	7.23	0.65	0.55	0.65	0.6	0.66	0.622	0.0465833
Fig. 2G, model simulation
Rel. dnaA mRNA	titration model	switch model
0.25	4.64599	3.20512
0.287175	3.93737	2.90986
0.329877	3.34389	2.62787
0.378929	2.87914	2.36171
0.435275	2.48883	2.1132
0.5	2.14703	1.88322
0.574349	1.85396	1.67258
0.659754	1.61421	1.48113
0.757858	1.38302	1.30841
0.870551	1.19348	1.15349
1	1.03494	1.0153
1.1487	0.905549	0.892386
1.31951	0.780346	0.783497
1.51572	0.681427	0.687136
1.7411	0.586917	0.602098
2	0.513374	0.527172
2.2974	0.442906	0.461241
2.63902	0.387437	0.403278
3.03143	0.33509	0.352432
3.4822	0.29329	0.307853
4	0.253236	0.268797
4.59479	0.221013	0.234604
5.27803	0.191909	0.204694
6.06287	0.167542	0.178551
6.96441	0.144261	0.153796
