# Supplementary material for: Extrusion-modulated DnaA activity oscillations coordinate DNA replication with biomass growth
Source: eLife. 2025 Nov 18;14:RP107214. doi: 10.7554/eLife.107214 (PMC12626423; doi:10.7554/eLife.107214)
Supplement: Figure 3—source data 1. [file elife-107214-fig3-data1.xlsx]

## Sheet: Figure 3B,C,E
	Fig. 3B
	Host strain	reporter promoters	Doubling Time （min）							GFP intensity per OD during exponential growth							Fold Change of GFP intensity
			[aTc]: 0.5 ng·ml-1			[aTc]: 50 ng·ml-1				[aTc]: 0.5 ng·ml-1			[aTc]: 50 ng·ml-1				GFPaTc0.5 / GFPatc 50
			rep.1	rep.2	rep.3	rep.1	rep.2	rep.3		rep.1	rep.2	rep.3	rep.1	rep.2	rep.3		rep.1	rep.2	rep.3	mean	SD
	RdnaA1	Psyn1	36.1	35.2	35.2	33	32.5	34		58455.1	53855.1	75316.3	26265.7	24992.2	27559.9		2.22553	2.15487	2.73282	2.37107	0.315266
		Psyn2	34.6	34.8	34.5	33.3	33.1	32.2		14958.8	15473.5	15719.7	15669.4	15655.1	15961.5		0.954651	0.988399	0.984851	0.975967	0.0185453
		Psyn3	35.9	38.9	36.8	34.8	36.5	35.2		58073.8	61048.4	62161.3	45262.6	44540.1	47114.9		1.28304	1.37064	1.31936	1.32435	0.0440124
		Psyn4	35.1	34.8	34	33.2	33.5	33.3		9453.38	10400.8	10648.5	11998.7	12227.1	12464.1		0.787868	0.850629	0.854335	0.830944	0.0373513
		Psyn5	36.4	37.3	34.5	34	33.3	33.7		71114.9	76224	75328.2	74979.3	76801.5	77554.9		0.948461	0.992481	0.971289	0.970744	0.0220149
		Psyn6	36	36.7	35.6	36.2	33.8	33.6		14326.5	14986.1	16040.4	13566.5	15064	15325.6		1.05603	0.994833	1.04665	1.0325	0.0329572
		Psyn7	35.5	35.4	35.5	34.1	34	34		17557.4	18498.6	18859.9	20222.8	20996.2	21704.7		0.868197	0.881045	0.86893	0.872724	0.00721536
		Psyn8	35	35.3	34.8	33.8	33.7	33.2		3186.96	3586.12	3642.21	3792.7	4072.91	4012.8		0.840289	0.880482	0.907649	0.87614	0.0338894
		Psyn9	34.9	35.3	34.7	33.9	33.6	33.5		2658.01	2815.71	3085.02	1696.85	1672.46	1680.01		1.56644	1.68357	1.8363	1.69544	0.135323
		Psyn10	35.2	34.7	34	32.8	33	32.6		9965.38	10254.1	10784	7996.8	8016.79	8441.89		1.24617	1.27908	1.27743	1.26756	0.0185427
		Psyn11	35.4	34.6	34.4	33.3	32.9	32.8		28773.5	29855	31277.3	30997.7	31498.4	33003.4		0.928246	0.947825	0.9477	0.941257	0.0112676
		Psyn12	36.6	34.4	34.1	33.8	34.6	32.4		7907.71	9309.6	9326.43	10188.3	10222.5	11567.3		0.776157	0.910697	0.806278	0.831044	0.0706062
		Psyn13	35.9	34.1	33.8	33.8	31	33.2		2582.41	2698.37	2594.98	1653.46	1883.6	1657.92		1.56183	1.43256	1.5652	1.51986	0.075625
		Psyn14	34.6	35.3	35.7	33.5	33.7	33.4		16537.4	17461.2	17816.9	18644.1	19949	20518.7		0.887005	0.875289	0.868326	0.876874	0.0094398
		Psyn15	35.6	34.5	35.4	35.4	33	34.4		12993.1	13894.9	14482.3	12368.6	13943.6	13903.5		1.05049	0.99651	1.04163	1.02954	0.0289476
		Psyn16	35.3	34.6	34.5	33.8	33.5	33.1		6767.39	7227.76	7638.37	2176.88	2385.77	2488.84		3.10876	3.02953	3.06905	3.06911	0.0396159
		Psyn17	37.3	35.9	35.4	34.1	33.7	33.4		13687.2	15137.7	16491	9643.36	9995.19	10274.4		1.41934	1.5145	1.60507	1.51297	0.0928721
		Psyn18	35	35	34.3	33.5	33.6	33.2		43188.6	43928.7	43689.5	25139.3	25226.8	24925.4		1.71797	1.74135	1.75281	1.73737	0.0177552
		Psyn19	35	35.9	34.8	32.7	33.6	32.5		61714.8	60621.9	64001.1	50023	48886.4	52255.1		1.23373	1.24006	1.22478	1.23285	0.00767461
		Psyn20	38.1	35.5	34.3	33.3	33.3	33.3		19250.5	21561.8	22565.3	15606.2	15631.4	16125.5		1.23352	1.37939	1.39935	1.33742	0.0905348
		Psyn21	35.5	35.3	34.8	34.1	34.4	33.6		3525.09	4012.13	4158.52	2965.34	3228.35	3196.54		1.18876	1.24278	1.30094	1.24416	0.0561027
		Psyn22	35.7	37.8	34.7	33.9	34	33.3		1595.52	1675.93	2070.32	1063.81	1078.1	1141.85		1.49981	1.55452	1.81313	1.62249	0.167353
		Psyn23	34.3	35.5	34.5	34.9	34.3	33.5		2787.06	2900.92	3128.86	2146.17	2294.46	2410.08		1.29862	1.26432	1.29824	1.28706	0.0196961
		Psyn24	35.8	35.5	35.6	34.5	34.1	34.5		11585.6	11967.2	12730.2	12594.4	13578.1	13295.9		0.919903	0.881366	0.957454	0.919574	0.038045
		Psyn25	35.9	35.7	35.5	34.2	33.8	33.7		9781.52	10187.2	10810.2	8771.99	9212.38	9353.25		1.11509	1.10582	1.15577	1.12556	0.026573
		Psyn26	35.4	35.4	35.6	33.8	33.4	33.5		8903.01	9464.18	10401.8	8382.71	8745	8969.3		1.06207	1.08224	1.15971	1.10134	0.0515459
		Psyn27	35.8	35.8	34.9	34.1	33.9	33.7		7157.8	7607.51	8030.37	7108.03	7355.42	7578.53		1.007	1.03427	1.05962	1.03363	0.0263158
		Psyn28	35.8	34.3	34.1	34.6	33.3	31.4		13419.4	13841	14218.6	7834.53	7601.13	7778.61		1.71285	1.82092	1.82792	1.78723	0.0645085
		Psyn29	35.4	35.4	35	34	34	33.6		8040.22	8026.58	8714.12	4599.38	4816.92	4958.25		1.74811	1.66633	1.7575	1.72398	0.0501457
		Psyn30	35.2	35.2	35.1	34.1	33.7	33.1		10516.2	10790.5	11365.1	2212.85	2083.76	2357.16		4.75235	5.17838	4.82153	4.91742	0.22863
		Psyn31	36.3	36.2	35.5	34.8	34.3	34.3		18578.6	19435.9	20635.5	16887	17170.3	18059.1		1.10017	1.13195	1.14267	1.12493	0.022101
		Psyn32	38	36.2	36.9	34.5	34.2	34.1		35307.3	37798.3	38479.9	30366.1	31347.3	33221		1.16272	1.20579	1.1583	1.1756	0.0262371
		Psyn33	35.7	35.4	35.2	34	33.6	33.1		3937.43	4083.49	4383	919.836	792.671	921.065		4.28058	5.15157	4.75862	4.73025	0.436187
		Psyn34	35.7	34.9	33.1	34.1	32.8	31.2		12374.1	13041.5	13711.7	6792.83	6997.16	7393.34		1.82164	1.86383	1.8546	1.84669	0.0221768
		Psyn35	35.3	34.9	34.8	34.1	33.8	33.5		9356.44	9669.32	10316.1	4885.15	4991.68	5320.46		1.91528	1.93709	1.93896	1.93044	0.0131624
		Psyn36	35.3	35.5	35.2	34.1	33.8	33.6		8173.69	8522.85	9133.38	1004.78	990.333	949.851		8.13483	8.60605	9.6156	8.78549	0.756516
		Psyn37	35.8	35.3	34.7	34.3	34.2	33.8		5039.38	5242.66	5755.38	2610.17	2743.1	2804.78		1.93067	1.91121	2.05199	1.96462	0.0762813
		Psyn38	35.9	36.3	34	34	33.8	32.4		7626.8	7578.6	8370.67	1673.58	1524.49	1614.79		4.55717	4.97123	5.18374	4.90405	0.318641
		Psyn39	35.7	35.4	34.8	33.9	33.9	33.7		5986.05	6249.14	6655.88	2151.86	2222.61	2355.74		2.78181	2.81162	2.82538	2.80627	0.0222748
		Psyn40	35.6	35.4	34.9	34.6	33.9	33.6		13228.9	14055.7	14356.5	9158.59	9488.11	9810.69		1.44442	1.4814	1.46335	1.46306	0.0184905
		Psyn41	35.7	35.4	36.7	33.9	33.8	33.4		21715	22817.7	22699.1	17338.1	18306.8	18612.2		1.25244	1.24641	1.21958	1.23948	0.0174927
		Psyn42	35.3	34.8	34.6	34.4	33.9	33.5		1283.02	1247.27	1358.34	587.895	516.846	570.691		2.18239	2.41323	2.38016	2.32526	0.124828
		Psyn43	35	34.9	30.8	34.5	34	31.6		2647.63	2767.81	3116.76	631.351	583.309	686.278		4.19359	4.74502	4.54155	4.49339	0.278848
		Psyn44	35.7	35.7	35.2	34.1	34.4	33.9		7617.17	8039.19	8541.71	3967.65	3737.54	4137.43		1.91982	2.15093	2.06449	2.04508	0.116772
		Psyn45	37.5	36.3	35	33.7	33.5	33.4		1570.45	1595.23	1849.33	294.514	304.981	222.815		5.33235	5.23059	8.29983	6.28759	1.7434
		Psyn46	36.8	36	34.9	34.4	34	33.4		1847.22	2089.17	2215.58	406.024	581.951	453.924		4.54954	3.58994	4.88094	4.34014	0.670489
		Psyn47	36.1	36.1	35.4	34.7	33.8	33.9		14979.1	16263.9	16552.9	11307.9	11982.2	12177		1.32466	1.35733	1.35936	1.34712	0.0194765
		Psyn48	38	35.8	35.2	34	33.7	33.7		6850.45	7809.26	8045.67	5628.3	5757.31	5824.43		1.21714	1.35641	1.38137	1.31831	0.0884936
		Psyn49	35.2	35.3	34	33.9	33.8	32.9		704.161	751.48	760.631	572.608	482.677	527.791		1.22974	1.5569	1.44116	1.40927	0.165894
		Psyn50	35.3	35.3	34.8	34.1	33.9	33.7		5967.24	6123.63	6327.08	4282.4	4224.45	4510.59		1.39343	1.44957	1.40272	1.41524	0.0300903
		Psyn51	35.5	35.4	34.7	33.7	33.9	33.7		1108.31	1224.57	1219.26	892.481	846.027	736.691		1.24183	1.44744	1.65505	1.44811	0.206615
		Psyn52	35.2	35.3	35.5	32.8	34.3	32		61377.7	62165.1	62743	11773.8	11250.4	12076.9		5.21309	5.52561	5.19531	5.31134	0.18578
		Psyn53	35.9	35.4	35.1	33	33.1	32.8		22050.6	22578.9	24218.8	1921.74	2066.25	1971.92		11.4742	10.9275	12.2818	11.5612	0.681356
		Psyn54	39.3	35.8	35.1	34	32.6	33.2		57397.5	65442.9	66724.1	6718.7	6802.28	6920.36		8.54294	9.62073	9.64172	9.26846	0.628409
		Psyn55	36.3	35.6	35	33.1	33	33		53388.6	55753.9	57932.1	9843.94	10430.7	10176.9		5.42351	5.34519	5.6925	5.48707	0.182172
		Psyn56	35.5	34.8	35	36.5	34.7	33.6		32012.7	32289.6	33330.7	16802.7	16909.4	17923.7		1.90521	1.90956	1.85959	1.89145	0.0276832
		Psyn57	35.2	36.8	35.1	33.6	32.8	33.9		57476.9	56303.3	58104.4	6363.09	6236.94	5872.26		9.03285	9.02738	9.89472	9.31832	0.499183
		Psyn58	36	36.2	36	34.9	34.2	33.9		27984.3	29499	31455.7	8975.54	9229.17	9253.71		3.11784	3.19627	3.39925	3.23779	0.145228
		Psyn59	36.9	36	36.8	34.9	34.4	33.6		24305.1	26748.5	28748.1	15785.2	16033.4	16334.7		1.53973	1.6683	1.75995	1.65599	0.110621
		Psyn60	35.4	35.5	35.3	34.4	34	34.1		11194.9	12049.7	12595.1	1759.44	1801.86	1811.51		6.36277	6.6874	6.95279	6.66765	0.295506
		Psyn61	35.8	35.8	36.8	34.7	34.1	33.9		21581.5	23098.8	25747.9	12023	12436.8	13063.7		1.79502	1.85729	1.97094	1.87442	0.0892035
		Psyn62	35.3	35.2	35.7	34	33.9	33.4		18614.6	19879.9	21444.8	7590.56	8021.73	8032.43		2.45234	2.47826	2.66977	2.53346	0.118763
		Psyn63	36.9	36.2	35.3	34.3	33.9	33.3		21904.9	22864	22766.8	1625.48	1746.56	1616.01		13.4759	13.0909	14.0883	13.5517	0.502987
		Psyn64	37.7	36.8	37	34.9	34.1	34		18528.8	20971.5	21510.8	2671.09	2852.86	2836.56		6.93679	7.35103	7.5834	7.29041	0.327544
		Psyn65	35.9	35	35.2	34	33.2	32.9		27697.7	27558	27181.8	4224.92	4618.46	4160.8		6.5558	5.96691	6.53281	6.35184	0.333558
		Psyn66	35.3	35.6	35	33.2	34	33		27052.7	27339.7	27815.3	2893.3	2815.02	2684.54		9.35012	9.71208	10.3613	9.80784	0.512346
		Psyn67	35	34.8	35.1	33	32.8	32.7		21178.1	21146.3	21325.2	6014.81	6213.02	6226.99		3.52099	3.40355	3.42465	3.44973	0.062608
		Pnative	35.5	34.8	34.4	33.2	33.2	32.6		7277.29	7749.54	7884.13	3997.91	3924.43	4108.35		1.82027	1.97469	1.91905	1.90467	0.0782073
		Pcon	35.7	34.3	34.8	33.7	33.1	33.7		15181.9	15592	16138.7	19892.2	20710.5	20510.6		0.763206	0.752856	0.786848	0.767637	0.0174235
	MG1655	--	32.1676	33.2287	31.7312	31.888	31.0121	31.4448		as the background fluorescence
		--	31.5205	31.2692	28.0592	31.6459	30.7987	30.9045
	Fig. 3C
				Doubling time (min)						Relative dnaA mRNA level (normalized to wild-type MG1655, using rpoA as the reference)						Relative gfp mRNA level, using rpoA as the reference (normalized to that under 0.75 ng·ml-1 aTc induction)
	Host strain	reporter plasmid	[aTc] ng·ml-1	rep.1	rep.2	rep.3	Mean	SD		rep.1	rep.2	rep.3	Mean	SD		rep.1	rep.2	rep.3	Mean	SD
	RdnaA1	Psyn66-gfp	0.75	32.69	32.39	33.13	32.7367	0.372201		0.301745	0.213983	0.231327	0.249018	0.0464788		1	1	1	1	0
			2	32.96	32.5	31.92	32.46	0.521153		0.683827	0.641736	0.719711	0.681758	0.0390286		0.563094	0.500574	0.585697	0.549788	0.0440938
			5	32.84	32.3	32.41	32.5167	0.285365		2.44436	2.19504	2.78273	2.47404	0.294967		0.225923	0.223968	0.270606	0.240165	0.0263803
			15	32.86	32.68	33.05	32.8633	0.185023		7.21607	6.74639	6.89425	6.95224	0.24015		0.144338	0.145676	0.136791	0.142268	0.00479
			50	32.78	33.66	32.97	33.1367	0.463069		10.6783	10.2051	9.03994	9.97443	0.843162		0.13054	0.126655	0.124167	0.127121	0.00321188
		Pcon-gfp	0.75	32.21	32.55	31.8	32.1867	0.375544		0.309906	0.278294	0.258209	0.282136	0.026062		1	1	1	1	0
			5	32.55	32.43	32.23	32.4033	0.161658		2.25799	2.4809	2.67557	2.47149	0.208946		1.03843	1.25751	1.19251	1.16282	0.112517
			50	33.01	33.13	32.39	32.8433	0.397157		8.6686	11.1859	11.1881	10.3475	1.454		0.938086	1.32778	1.17211	1.14599	0.196157
		Pnative-gfp	0.75	32.75	32.43	32.51	32.5633	0.166533		0.255192	0.290385	0.224091	0.256556	0.0331681		1	1	1	1	0
			2	32.69	32.5	32.3	32.4967	0.195021		0.725277	0.699859	0.820358	0.748498	0.0635174		0.855354	0.938	0.973037	0.92213	0.060425
			5	32.56	31.88	32.14	32.1933	0.343123		3.0128	2.11498	2.34688	2.49155	0.466068		0.688561	0.582858	0.63289	0.63477	0.0528769
			15	32.62	32.77	32.99	32.7933	0.1861		6.65763	5.49919	6.86028	6.33903	0.734348		0.525795	0.480938	0.526038	0.510924	0.0259686
			50	32.71	32.51	32.76	32.66	0.132288		10.2256		9.47439	9.84998	0.531168		0.49794		0.526086	0.512013	0.0199021
	MG1655	none		31.42	30.08	30.83	30.7767	0.67159
	Fig. 3E
				Doubling time (min)						Relative dnaA mRNA level (normalized to wild-type MG1655, using rpoA as the reference)						Relative gfp mRNA level, using rpoA as the reference (normalized to that under 0.5 ng·ml-1 aTc induction)						Relative seqA mRNA level (normalized to wild-type MG1655, using rpoA as the reference)
	Host strain	reporter plasmid	[aTc] ng·ml-1	rep.1	rep.2	rep.3	Mean	SD		rep.1	rep.2	rep.3	Mean	SD		rep.1	rep.2	rep.3	Mean	SD		rep.1	rep.2	rep.3	Mean	SD
	RseqA1	Psyn66-gfp	0	41.34	41.52	41.56	41.4733	0.117189		2.53889	1.99816	2.52281	2.35329	0.307654		1.34665	1.2153	1.16258	1.24151	0.0947922		0.0478862	0.0513159	0.068286	0.0558294	0.0109232
			0.5	34.32	34.41	34.04	34.2567	0.192959		1.42694	1.581	1.6297	1.54588	0.105844		1	1	1	1	0		0.118671	0.131164	0.133371	0.127735	0.00792704
			1.5	33.16	33.21	33.04	33.1367	0.0873689		1.19549	1.18523	1.28907	1.22327	0.0572201		0.936813	0.991202	1.02315	0.983722	0.0436526		0.171531	0.166421	0.201648	0.179867	0.0190359
			5	33.54	33.44	33.26	33.4133	0.141892		1.24113	1.15336	1.19599	1.19683	0.0438896		1.02702	1.08372	0.919432	1.01006	0.0834465		0.593508	0.686971	0.590382	0.623621	0.0548854
			50	34.85	34.84	34.98	34.89	0.0781025		1.01802	1.12506	1.03082	1.05797	0.0584586		1.10401	0.962531	1.00941	1.02532	0.0720702		2.25524	2.1496	2.18693	2.19726	0.0535708
	MG1655	none		30.86
	Notes: When the expression of SeqA was not induced by aTc, the growth rate of the strain was significantly slower, so the response of the reporter promoter under such complex conditions was not considered.
