# Supplementary material for: Extrusion-modulated DnaA activity oscillations coordinate DNA replication with biomass growth
Source: eLife. 2025 Nov 18;14:RP107214. doi: 10.7554/eLife.107214 (PMC12626423; doi:10.7554/eLife.107214)
Supplement: Figure 4—source data 1. [file elife-107214-fig4-data1.xlsx]

## Sheet: Figure. 4B,D,E,G,H
	Fig. 4B											Fig. 4D						Fig. 4E					Fig. 4G											Fig. 4H
	MGCL1 Cells containg Psyn66-lacZ cultivated in M1 medium					MGCL1 Cells containg Pcon-lacZ cultivated in M1 medium						MGCL1 Cells containg Psyn66-lacZ cultivated in M1 medium						MGCL1 Cells containg Psyn66-lacZ cultivated in M1 medium					RdnaA2 containg Psyn66-lacZ or Pcon-lacZ plasmid cultivated in M6 medium with 2 ng·ml-1 aTc											RdnaA2 containg Psyn66-lacZ cultivated in M6 medium with 2 ng·ml-1 aTc
																							original data
	original data		binned data			original data		binned data				Binned Cell volume (µm3)	Rel. DnaA activity (ksyn66-1)					original data		binned data			Psyn66-lacZ		Pcon-lacZ		Binned Cell volume (µm3)	Rel. DnaA activity (ksyn66-1)						original data		binned data
	Cell volume (µm3)	Rel. lacZ mRNA conc. lacZ mRNA FISH intensity per cell volume, normalized to populational average	Cell volume (µm3)	Rel. lacZ mRNA conc. lacZ mRNA FISH intensity per cell volume, normalized to populational average		Cell volume (µm3)	Rel. lacZ mRNA conc. lacZ mRNA FISH intensity per cell volume, normalized to populational average	Cell volume (µm3)	Rel. lacZ mRNA conc. lacZ mRNA FISH intensity per cell volume, normalized to populational average									Cell volume (µm3)	Rel. dnaA mRNA conc. lacZ mRNA FISH intensity per cell volume, normalized to populational average	Cell volume (µm3)	Rel. dnaA mRNA conc. lacZ mRNA FISH intensity per cell volume, normalized to populational average		Cell volume (µm3)	Rel. lacZ mRNA conc. lacZ mRNA FISH intensity per cell volume, normalized to populational average	Cell volume (µm3)	Rel. lacZ mRNA conc. lacZ mRNA FISH intensity per cell volume, normalized to populational average								Cell volume (µm3)	Rel. dnaA mRNA conc. lacZ mRNA FISH intensity per cell volume, normalized to populational average	Cell volume (µm3)	Rel. dnaA mRNA conc. lacZ mRNA FISH intensity per cell volume, normalized to populational average
													Mean	SEM	Smoothed datat													Mean	SEM	Smoothed datat
	2.78	1.24	1.7	1.38885		4.83	0.78	1.5	0.908372			1.7	0.85	0.048117	0.811614			3.19	0.82	1.6	1.22843		1.54	1.06	2.892	0.894233	1.2	3	0.246928	2.97715				1.38	1.47	1.1	1.02302
	1.97	0.5	1.8	1.3233		2.32	1.36	1.6	0.912055			1.8	0.93	0.044036	0.903741			2.98	0.69	1.7	1.18439		1.59	0.87	2.35589	0.895578	1.3	2.72	0.121287	2.86052				1.36	1.12	1.2	1.07694
	2.18	0.15	1.9	1.24315		1.94	0.61	1.7	0.926846			1.9	0.99	0.036571	1.01746			1.82	0.75	1.8	1.17117		1.08	1.13	1.23734	0.684434	1.4	2.72	0.111521	2.69938				1.69	0.85	1.3	1.07635
	2.68	0.43	2	1.23528		1.7	0.5	1.8	0.930319			2	1.06	0.039946	1.15134			2.55	1.03	1.9	1.1542		1.41	1.04	2.40704	1.10577	1.5	2.74	0.121914	2.4983				1.6	1.27	1.4	1.06856
	2.23	0.98	2.1	1.12176		2.36	0.92	1.9	0.927547			2.1	1.25	0.040644	1.3039			1.89	1.97	2	1.12134		1.49	0.94	1.78597	0.898407	1.6	2.28	0.073934	2.26288				2	1.21	1.5	1.06106
	1.56	1.07	2.2	1.09954		2.97	1.53	2	0.957186			2.2	1.44	0.054679	1.47457			1.74	0.97	2.1	1.097		1.09	0.16	2.33807	0.880487	1.7	2.06	0.116905	1.98246				1.43	1.16	1.6	1.03664
	1.38	2.32	2.3	1.00121		3.7	0.59	2.1	0.951288			2.3	1.64	0.085193	1.66659			3.22	1.19	2.2	1.0505		2.58	0.16	1.87258	0.754651	1.8	1.56	0.049664	1.63449				1.61	0.89	1.7	1.0349
	2.56	0.26	2.4	0.878413		4.43	0.75	2.2	0.99638			2.4	1.82	0.055023	1.89172			2.38	1.05	2.3	0.991459		3.09	0.6	2.48039	1.18845	1.9	1.25	0.037811	1.32978				2.53	1.38	1.8	1.00864
	3.97	1.32	2.5	0.771323		2.65	0.74	2.3	0.996449			2.5	2.14	0.057688	2.12536			2.1	1.17	2.4	0.937839		1.67	1.24	2.264	1.07834	2	1.18	0.078977	1.13083				2.44	0.93	1.9	1.00417
	2.17	0.31	2.6	0.736153		1.65	0.43	2.4	1.03115			2.6	2.36	0.067217	2.3314			2.2	0.88	2.5	0.887393		2.02	1.31	1.96191	1.47992	2.1	0.95	0.017602	1.04332				1.93	1.26	2	0.986634
	3.37	1.55	2.7	0.671595		1.54	1	2.5	1.02853			2.7	2.6	0.073435	2.49368			4.95	0.92	2.6	0.85126		1.61	1.09	2.25981	0.750046	2.2	1.08	0.03609	1.04844				1.8	1.02	2.1	0.998432
	2.45	0.4	2.8	0.691955		2.24	1.27	2.6	1.06083			2.8	2.46	0.063764	2.58968			4.79	0.82	2.7	0.800422		2.31	0.21	1.93184	0.798693	2.3	1.14	0.06357	1.11052				2.33	0.86	2.2	0.979998
	1.71	1.32	2.9	0.640035		1.58	0.95	2.7	1.06106			2.9	2.71	0.071323	2.59371			1.87	1.34	2.8	0.817242		2.12	2.54	2.54851	1.24546	2.4	1.22	0.063466	1.20693				2.45	0.91	2.3	0.969393
	2.47	0.22	3	0.713027		2.02	0.69	2.8	1.07488			3	2.48	0.062553	2.50182			2.83	0.94	2.9	0.838736		2.19	0.7	2.10039	1.24538	2.5	1.33	0.099462	1.33247				1.72	0.87	2.4	0.964194
	2.1	0.51	3.1	0.751163		2.69	0.83	2.9	1.09176			3.1	2.42	0.070336	2.32963			1.7	1.1	3	0.856209		1.67	1.01	2.07417	0.169256	2.6	1.44	0.054856	1.46806				1.04	1.86	2.5	0.951486
	3.2	1.33	3.2	0.863871		3.34	0.78	3	1.0934			3.2	2.13	0.119419	2.09903			4.29	1.19	3.1	0.905594		1.8	1.53	2.34358	0.987304	2.7	1.62	0.062956	1.60596				1.54	1.23	2.6	0.94917
	2.51	0.87	3.3	0.927239		2.1	1.09	3.1	1.09941			3.3	1.74	0.05418	1.8326			2.25	1.37	3.2	0.959737		1.75	1.55	2.08225	0.657282	2.8	1.83	0.071781	1.77167				2.17	1.14	2.7	0.954557
	3.86	1.17	3.4	1.06467		3.95	0.66	3.2	1.06168			3.4	1.55	0.081415	1.55896			2.55	1.23	3.3	1.01398		2.84	0.16	2.06854	1.14994	2.9	1.94	0.082469	1.96809				3.3	1.15	2.8	0.945302
	2.81	0.29	3.5	1.12679		3.52	0.83	3.3	1.03939			3.5	1.29	0.091639	1.31403			2.73	0.87	3.4	1.02206		1.66	1.45	2.23206	0.869056	3	2.08	0.089891	2.15421				1.78	0.63	2.9	0.958068
	2.57	0.41	3.6	1.19675		3.61	1.12	3.4	1.03542			3.6	1.1	0.041874	1.11572			2.44	0.78	3.5	1.0923		1.72	1.44	1.49048	1.03611	3.1	2.37	0.121051	2.35424				1.26	1.17	3	0.970153
	2.25	1.3	3.7	1.26958		1.91	0.82	3.5	1.00012			3.7	0.94	0.029755	0.968754			2.67	0.8	3.6	1.1156		1.42	0.26	1.3546	1.12131	3.2	2.82	0.306242	2.57396				2.23	0.86	3.1	0.960336
	2.99	0.3	3.8	1.28512		2.93	1.35	3.6	0.981932			3.8	0.89	0.027466	0.86543			2.83	0.65	3.7	1.14426		1.35	0.43	1.98748	1.45435	3.3	2.45	0.136448	2.81116				2.21	0.8	3.2	0.99039
	2.49	0.11	3.9	1.34428		2.05	1.19	3.7	0.958995			3.9	0.8	0.022743	0.799025			1.15	0.67	3.8	1.1498		2.2	0.93	1.87223	0.930846	3.4	3.21	0.184676	3.06351				2.54	1.31	3.3	1.00687
	3.3	1.69	4	1.36666		2.16	1.36	3.8	0.945065			4	0.76	0.029662	0.749861			2.85	1.42	3.9	1.15106		1.45	0.64	1.74064	1.85476								1.7	0.91
	4.25	1.48	4.1	1.41733		1.92	0.97	3.9	0.943979			4.1	0.75	0.0194	0.719714			2.94	0.69	4	1.15972		2.04	2.25	1.32325	1.02447								1.87	0.77
	2.39	0.76	4.2	1.39233		4.04	0.7	4	0.916264			4.2	0.72	0.019399	0.710603			3.09	1.01	4.1	1.15741		1.56	0.17	2.1019	0.795295								2.89	0.99
	2.15	0.26	4.3	1.2707		3.06	0.98	4.1	0.907126			4.3	0.81	0.032551	0.722668			1.81	1.37	4.2	1.15332		1.23	0.29	1.96688	0.577248								2.05	0.93
	5.43	0.54	4.4	1.32087		2.94	1.09	4.2	0.890024			4.4	0.74	0.023483	0.755355			2.7	0.91	4.3	1.14352		1.43	0.62	2.13615	0.675287								1.64	1.16
	4.46	1.09	4.5	1.2801		3.22	1.21	4.3	0.932845			4.5	0.76	0.021129	0.807689			2.92	0.94	4.4	1.13852		1.89	1.2	2.13398	0.846357								1.42	0.92
	2.49	0.21				2.73	1.33	4.4	0.878445									4.06	1.27	4.5	1.12717		1.88	1.61	2.033	0.98976								2.47	1
	3.35	1.75				3.77	0.56	4.5	0.897862									3.17	0.91	4.6	1.09621		2.98	0.4	1.1988	1.31549								2.8	1.27
	2.44	0.24				3.57	1.04	4.6	0.904262									3.48	1.16				1.66	0.36	2.34655	0.750664								2.55	0.99
	3.74	0.64				2.31	0.85	4.7	0.851539									4.27	1.17				1.83	1.32	2.74824	1.03401								1.7	1.2
	4.18	1.87				3.7	1.86	4.8	0.895154									3.14	1.26				1.65	0.16	1.51636	0.58891								2.23	0.89
	4.06	2.01				2.07	0.79	4.9	0.912144									4.5	1.16				2.34	2.26	1.9927	1.15725								2.9	1.13
	2.88	0.34				2.12	0.88	5	0.88284									2.16	0.51				2.03	1.73	1.60106	1.51928								2.24	0.68
	2.91	0.43				2.11	0.66	5.1	0.887585									3.23	0.68				3.04	0.69	3.39715	0.969815								2.67	1.39
	4.74	0.91				3.89	0.89	5.2	0.879819									1.99	0.73				2.13	1.28	2.46569	0.585213								2.16	1.1
	4.98	0.31				1.9	0.6											2.6	0.88				1.59	0.15	2.01136	0.956218								1.99	0.9
	2.4	1.14				2.7	1.46											1.94	0.96				2.15	1.31	2.31035	0.872644								2.72	1.15
	4.91	1.45				2.99	1.72											3.56	1.28				2.44	1.38	1.83309	1.59816								1.59	1.15
	3.51	0.36				2.35	0.73											3.69	1.24				2.32	1.48	1.50858	1.19414								1.4	1.11
	3.94	1.28				2.76	1.97											2.99	0.67				2.59	0.73	1.50331	0.995477								2.64	1.64
	3.34	1.15				3.67	1.18											4.23	1.23				1.67	0.4	1.90892	1.39146								2.06	0.85
	4.74	1.23				3.77	0.61											4.37	0.97				1.9	1.08	1.68207	1.79997								2.88	0.89
	5.13	1.21				3.39	0.49											3.35	0.89				2	0.67	2.2763	0.758222								1.55	0.89
	3.55	1.27				3.28	1.37											3.21	1.13				3.01	1.08	1.44157	1.70971								1.69	0.88
	5.9	0.18				2.42	1.31											2.41	1.05				1.99	0.74	1.38572	1.23608								2.47	0.94
	3.14	0.49				4.14	0.53											2.65	0.76				2.64	1.4	2.06574	0.97543								1.89	0.68
	5.21	1.28				5.3	0.88											3.66	1.02				2.12	1.62	1.45314	1.54899								1.48	0.97
	2.83	0.54				2.45	0.57											2.41	0.77				2.61	1.97	3.3383	1.14401								1.82	0.93
	2.6	0.61				2.46	0.69											2.17	0.97				3.04	0.16	2.79848	1.11899								3.89	1.01
	3.33	0.73				3.04	1.34											3.57	0.91				2.22	0.78	1.65576	0.628538								1.94	1.31
	3.48	0.26				3.3	1.13											2.98	0.48				1.89	1.13	1.28718	0.643113								2.49	1.19
	3.46	1.19				3.45	1.45											2.87	0.52				1.31	1.18	2.61196	1.19185								2.42	1.09
	2.67	1.26				3.05	0.89											1.84	0.9				1.8	1.73	2.62116	1.11857								3.36	0.93
	3.85	1.04				1.81	1.34											2.65	1.16				1.61	1.26	1.72639	0.67466								2.2	1.06
	2.33	1.11				3.54	0.88											3.37	1.3				2.97	0.75	2.42747	1.01326								1.51	1.13
	2.89	0.4				1.87	0.76											4.17	1.16				3.1	1.85	1.79848	1.60528								1.56	0.97
	2.72	1.04				2.94	1.1											3.02	0.61				3.15	0.19	2.27879	0.8086								1.31	0.85
	2.61	1.9				3.86	0.78											2.47	0.68				1.39	0.14	1.14482	0.717717								1.39	1.57
	2.77	1.18				2.71	0.38											2.13	0.74				2.01	1.17	1.44289	1.50993								1.39	1.74
	3.31	1.41				4.11	1.13											2.25	1.88				2.29	1.94	2.12253	0.995766								1.63	1.65
	2.7	0.39				4.97	0.96											3.45	0.9				2.65	2.78	2.70605	1.19263								1.51	1.33
	2.95	0.28				3.29	1.07											3.07	1.41				2.04	1.25	1.27871	0.846513								2.18	0.98
	2.08	0.31				4.46	0.83											4.68	1.27				2	1.15	2.06356	1.06632								1.16	1.24
	2.08	0.98				2.67	1.36											3.82	1.07				1.82	1.24	2.59058	0.678025								2.2	0.96
	3.58	2.03				2.95	0.96											2.93	0.58				2.28	1.44	1.54454	0.64557								3.59	1.21
	1.98	1.32				5.72	0.77											2.18	1.09				2.31	0.92	1.56816	0.865086								2.26	0.85
	2.3	0.25				2.95	1.87											2.07	0.82				3.21	0.99	1.62852	1.15315								1.77	1.4
	2.91	0.77				2.43	0.56											3.32	0.95				1.82	0.67	1.58381	1.21588								1.92	0.89
	3.28	0.77				3.97	0.86											2	1.02				3.39	1.33	1.42634	0.939914								2.63	1.26
	1.72	1.38				2.38	0.77											4.16	1.58				2.25	3.06	2.07903	1.18919								1.38	1.41
	2.62	0.99				3.66	1.2											4	1.58				2.76	0.64	2.81464	0.891297								1.82	1.57
	2.76	0.36				3.02	1.23											3.5	1.26				2.4	1.35	1.93933	1.02281								1.76	0.94
	1.81	0.76				4.17	0.88											3.24	0.49				2.75	0.59	3.15569	1.05642								1.47	1.32
	1.6	2.3				2.97	1.6											2.93	0.93				1.72	0.2	2.50899	1.17624								2.47	1.13
	3.1	1.33				2.86	1.08											2.5	0.63				2.35	0.94	1.97149	1.00144								2.21	0.85
	3.92	1.1				3.84	0.86											2.87	0.56				1.93	0.99	1.61428	2.09604								1.76	1.33
	2.99	1.57				2.45	1											4.64	0.96				1.74	0.12	2.49631	0.693605								2.79	0.98
	3.67	1.36				1.83	0.69											2.1	0.79				1.98	1.15	1.98136	0.614926								1.32	0.98
	1.83	2.38				4.26	0.87											2.63	1.41				2.33	0.97	1.67032	2.01908								1.73	0.81
	2.68	0.22				2.66	1.06											2.54	0.65				1.85	1.73	1.8816	1.04009								1.35	0.99
	3.39	1.87				2.43	0.96											2.71	0.68				2.51	1.19	2.30833	1.16894								1.94	1.18
	2.95	0.98				2.35	1.53											2.64	1.04				2.21	1	1.9447	1.70954								2.96	0.92
	2.12	1.09				2.57	0.8											3.28	0.73				3.78	0.2	2.19299	1.03793								1.58	0.98
	3.48	1.55				4.62	1.13											2.07	1.18				2.16	1.47	1.81772	0.822913								1.94	0.78
	4.92	0.51				1.82	1.12											2.3	0.64				1.79	0.98	1.63212	2.11037								1.95	1.39
	2.63	1.29				2.31	0.65											3.03	0.68				2.27	1.16	1.98125	0.708493								1.93	1.05
	2.97	1.08				2.84	0.96											2.96	0.87				2.79	1.53	2.14776	0.87363								2.23	1.5
	2.84	0.34				2.76	0.9											3.25	1.3				2.37	1.51	2.14236	1.02947								2.93	0.99
	3.13	0.31				4.45	0.66											2.59	1.04				1.78	0.98	2.05154	0.854027								2.7	0.92
	2.08	0.36				3.07	1.74											2.83	0.59				1.93	0.82	1.18862	0.992326								1.62	0.81
	2.91	0.21				2.75	1.49											3.66	0.94				2.53	1.3	2.03201	0.706193								2.16	0.81
	2.64	0.33				3.06	0.97											2.7	0.7				2.09	1.17	1.77223	1.40709								2.28	0.79
	1.76	1.41				3.64	0.93											1.77	1.11				2.14	0.97	2.17783	0.912007								1.54	0.79
	3.85	2.04				1.94	1.25											2.74	0.89				1.33	1.26	2.22562	1.04834								2.76	0.8
	4.15	1.23				1.98	0.93											3.35	1.13				1.34	1.34	1.34252	1.21029								1.71	1.15
	3.55	0.85				2.27	0.57											2.63	1.34				2.24	0.74	1.2387	1.18502								1.79	0.73
	2.02	2.32				3.31	0.64											3.17	1.23				2.07	0.22	1.61607	1.16383								3.4	0.83
	4.69	1.31				2.6	1.37											3.23	0.94				1.79	1.24	1.56491	1.94965								1.73	0.52
	2.69	0.77				4.09	1.32											4.02	0.95				1.78	0.72	2.07263	0.846548								2.65	0.95
	2.36	1.23				1.6	1.44											1.95	1.56				2.37	0.73	1.46112	1.07056								2.59	0.8
	2.06	0.61				3.23	1.18											2.78	1.47				1.93	1.66	1.8469	0.833175								2.01	0.82
	2.22	0.92				3.98	0.76											2.08	0.93				1.3	0.24	2.24664	0.86347								2.37	0.63
	1.97	2.78				2.79	1.15											2.53	1.3				1.8	1.18	1.6386	0.388797								1.98	1.57
	3.76	0.47				4.61	0.77											1.7	1.54				1.39	1.63	2.15426	1.0024								1.62	0.72
	2.79	1.19				3.13	0.64											4.53	1.21				1.61	2.19	1.73513	1.82003								3.07	1.08
	4.86	1.17				1.86	0.71											3	0.74				2.18	1.07	2.04133	0.559152								2.3	0.93
	2.73	0.28				2.1	0.75											2.88	1.45				2.28	1.36	1.53723	1.30262								2.99	1.34
	4.74	1.41				2.59	1.47											2.73	0.9				2.1	0.73	1.46685	1.01126								3.53	0.71
	5.46	0.42				3.34	0.96											2.61	0.57				1.36	0.38	1.62595	0.80222								2.61	1.69
	3.68	0.4				3.72	1.51											3.81	1				1.71	1.62	2.12596	0.970526								2.08	0.88
	3.36	0.21				2.29	0.91											2.08	0.86				2.15	1.25	2.04189	1.29666								1.78	0.98
	2.88	0.45				2.82	1.51											3.12	1.31				2.75	0.31	1.9872	1.06414								1.87	1.13
	5.27	0.85				4.48	1.54											3.17	1.17				1.7	0.49	1.88948	0.849721								2.86	0.83
	2.52	0.95				2.47	1											2.47	0.68				1.11	0.25	2.18278	1.02841								3.12	0.91
	3.04	1.17				4.77	0.82											2.13	1.41				1.8	1.51	2.06757	1.14095								1.85	1.28
	2.86	1.16				3.5	0.97											2.73	0.67				1.79	0.99	1.96853	1.25529								1.34	1
	3.41	1.15				2.23	0.41											4.48	0.79				1.3	0.21	1.63861	1.38386								2.48	0.92
	2.75	1.05				5.04	1.15											3.36	0.87				2.33	0.65	2.26996	0.853494								2.75	0.67
	4.03	1.11				3.8	0.81											2.08	0.75				1.77	1.46	1.88951	1.38599								3.76	1.23
	4.44	1.18				4.63	0.9											2.76	0.84				2.24	1.37	2.60129	1.18162								2.39	0.99
	3.17	0.77				4.3	1.05											2.03	1.48				1.45	1.52	1.72174	1.40651								1.54	1.22
	2.27	1.23				3.08	0.85											2.05	1.58				1.36	1.24	1.68368	0.96603								1.22	0.98
	3.71	0.69				4.52	0.54											2.45	0.75				2.48	1.64	1.50573	1.7007								1.67	0.92
	3.12	0.53				4.16	1.04											2.42	1.3				1.81	1.4	1.21953	0.696892								1.68	0.91
	3.35	1.19				3.44	1.73											3.08	0.6				2.15	0.97	1.64542	0.850822								1.68	1.56
	2.1	0.27				2.2	0.73											2.56	0.68				1.98	1.35	1.82537	0.64603								1.62	1.08
	2.21	0.28				3.58	1.06											3.74	1.02				1.5	1.03	2.21091	1.69254								1.55	1.45
	3.05	1.98				2.68	0.66											3.95	1.19				1.81	1.39	2.15854	1.31102								1.73	1.12
	2.2	0.25				4.14	1.66											2.82	0.81				2.34	1.04	1.72266	0.949736								1.62	1.51
	3.52	1.74				3.26	1.1											2.21	0.91				2.3	1.48	1.43978	0.798633								1.59	0.92
	1.47	1.73				5.04	0.83											3.2	0.95				1.83	1.23	1.71544	0.548475								1.58	1.06
	3.36	1.27				3.19	1.56											2.72	0.63				1.64	1.74	1.45729	0.906102								1.84	1.84
	2.44	0.41				2.9	1.22											4.17	0.94				1.43	0.75	2.25999	0.768167								1.8	1.65
	2.21	1.26				3.69	0.82											1.78	1.3				2.21	1.06	2.34305	1.15854								2.32	0.91
	1.7	1.49				1.91	0.98											2.52	0.68				2.55	1.15	3.09106	0.930222								2.22	1.25
	3.25	1.38				1.82	0.83											2.11	1.68				1.52	0.3	1.73631	1.13915								1.76	0.98
	4.52	0.32				1.8	0.96											1.87	1.05				2.22	2.21	2.25659	0.756662								1.56	2.48
	3.21	2.29				4.25	0.6											3.43	0.94				1.78	1.29	1.90583	0.812694								2.42	0.94
	3.6	1.32				2.64	1.18											2.64	0.66				2.27	1.13	2.62773	0.658948								2.59	0.84
	1.9	0.98				1.89	0.76											2.96	0.77				1.66	0.5	1.61953	0.903775								1.51	0.86
	1.75	0.56				1.58	0.9											3.13	1.04				2.29	1.43	1.811	1.28816								1.73	1.5
	3.53	1.38				2.93	1.04											4.22	1.34				1.35	1.35	1.53011	1.40756								2.22	0.77
	2.49	0.66				2.72	1.37											2.62	0.69				2.04	0.57	2.57977	0.544581								3	1
	3.52	0.75				2.15	0.88											2.99	0.62				2.65	1.29	1.67602	0.938739								2.5	0.92
	2.87	0.71				2.54	0.94											2.76	0.94				2.93	0.49	1.86711	1.07431								2.07	1.19
	3.05	0.19				2.11	1.14											2.73	0.49				3.04	1.61	2.52441	0.758581								2.69	0.7
	3.58	1.64				3.28	0.6											5.47	0.79				3.3	1.18	2.71489	0.982684								1.76	1.45
	3.19	0.71				2.8	1.14											4.15	0.87				1.58	0.12	2.49206	1.1864								1.28	1.41
	3.92	2.11				3.4	1.61											2.12	1.31				2.99	0.97	1.66415	0.747994								2.31	0.75
	2.8	1.71				3.19	0.63											2.77	1.01				3.39	0.28	2.91106	0.373962								3.61	1.04
	4.18	1.57				1.64	1.06											1.32	0.64				2.17	1.28	2.61512	1.03645								1.64	0.84
	3.29	0.17				3.06	1.02											3.78	1.23				2.07	1.28	1.89565	0.57528								3.24	0.75
	3.51	1.23				1.67	0.72											2.39	0.71				2.93	0.96	2.24156	1.21672								3.35	0.55
	3.18	0.9				2.75	0.94											2.87	0.71				2.92	1.45	1.84887	0.949782								1.3	1.25
	3.89	1.39				2.1	0.77											3.55	1.06				1.98	0.91	2.56109	1.53787								2.09	1.69
	2.56	1.04				1.86	0.85											3.18	1.41				3.32	0.5	2.28246	1.14712								2.43	0.9
	3.42	1.56				3.1	0.81											4.12	1.34				2.62	0.93	2.7793	1.11131								1.58	1.29
	3.46	1.57				4.63	0.97											1.8	1.25				1.69	0.19	2.29136	0.485092								3.67	0.89
	3.51	1.38				4.27	0.71											2.15	0.73				2.84	1.21	2.09424	0.615716								2.36	0.81
	2.81	0.31				2.13	1.11											3.19	0.79				1.3	1.7	2.35507	0.684386								2.43	1.25
	3.84	0.93				3.45	0.8											2.25	1.31				3.07	0.54	2.07721	1.03104								1.67	0.8
	3.07	0.15				3.41	1.15											2.14	1.27				1.6	0.65	2.2428	0.719019								1.71	0.84
	3.56	1.24				1.96	1.2											3.08	0.67				3.46	0.45	2.22002	1.00296								3.2	1.06
	2.12	1.21				2.92	1.04											2.27	0.7				2.95	0.84	2.05282	1.03492								2.34	0.66
	2.45	1.02				3.61	1.23											4.11	1.17				2.22	1.16	1.5227	1.10043								1.63	1.08
	2.2	0.55				2.29	0.9											2.8	0.58				3.52	1.38	1.63666	1.12647								2.61	0.83
	3.85	0.73				2.44	0.63											3.41	1.09				1.92	1.02	1.42061	0.768177								3.28	0.77
	2.11	1.1				2.69	1.65											4.02	1.33				2.72	1.36	2.25295	1.11014								1.72	0.95
	2.53	0.99				3.65	1.14											3.39	0.98				2.78	1.49	2.34702	1.7635								2.65	0.68
	2.55	0.59				4.28	1.49											3.51	0.7				2.74	1.48	2.24155	1.30466								2.48	0.65
	2.93	0.23				3.12	0.92											2.48	0.68				2.5	1.08	3.04458	0.985777								2.65	0.78
	2.47	1.47				2.08	0.93											5.01	1.04				2.37	1.46	2.78347	1.03082								1.54	1.18
	3.38	0.4				5.51	0.54											3.57	1.01				2.4	0.95	1.38588	0.673462								2.78	0.95
	3.95	1.28				4.64	1											4.01	1.11				2.87	0.56	1.68037	0.743869								1.39	1.08
	2.71	0.61				2.04	1.49											3.86	0.89				1.65	0.87	2.82121	1.10003								2.79	1.26
	4.9	1.14				4.06	0.72											3.46	0.68				2.76	0.82	2.62366	0.796437								1.26	0.8
	2.67	0.42				2.54	0.6											2.71	0.91				2.24	1.26	2.30327	1.20758								2.48	0.89
	2.39	1.59				1.85	1.11											2.63	1.06				2.52	1.48	2.07306	0.598157								2.38	0.85
	3.33	0.5				3.83	0.75											3.37	0.93				2.29	1.52	1.91116	1.45701								2.43	1.48
	2.81	1.76				4.03	0.87											4.15	1.24				3.14	0.73	1.5246	1.72775								3.08	1.19
	2.67	0.23				5.39	1.12											5.74	0.82				1.88	1.65	2.11265	1.14428								3.12	0.7
	3.14	0.43				3.2	1.09											2.58	0.98				3.21	0.85	2.99948	1.43441								2.01	0.69
	3.29	0.48				2.61	0.34											4.63	0.93				1.94	1.29	1.76044	0.792696								1.82	1.2
	5.31	1.67				2.34	1.41											3.14	0.58				1.6	1.14	1.69474	0.998948								2.73	0.83
	3.67	1				5.5	0.64											2.81	0.7				1.97	0.86	1.64439	0.932516								3.19	0.97
	2.73	0.27				3.5	0.87											3.9	0.65				1.57	1.01	2.82632	1.05041								2.26	1.41
	2.88	0.51				2.76	0.64											2.58	1.21				1.89	1.34	1.83054	0.799483								1.83	1.04
	3.59	0.8				3.39	0.83											4.7	1.39				2.61	0.32	2.48501	1.22077								1.77	1.12
	2.77	2.14				3.68	1.63											3.06	0.54				1.68	1.71	2.2785	1.13109								1.06	0.83
	3.04	1.6				2.81	1.05											3.77	0.97				2.26	1.45	1.94406	0.758569								1.88	0.81
	4.02	1.3				2.34	0.77											3.45	0.62				2.02	2.16	1.74611	0.832397								2.11	1.31
	4.41	1.16				3.19	0.95											3.5	0.55				2.12	1.5	1.7633	1.22392								1.49	0.85
	1.89	0.89				3.29	1.16											3.32	0.95				2.47	0.92	1.93153	0.780556								3.04	1.19
	2.71	0.28				1.69	0.35											3.05	0.54				1.93	1.18	1.48478	1.70733								1.78	0.81
	1.48	1.16				2.35	1.38											4.27	0.93				1.8	0.51	2.16355	1.1361								1.74	1.08
	3.16	1.55				4.09	0.85											2.74	0.76				1.53	0.67	2.90715	1.16243								2.02	0.62
	2.58	0.16				4.41	0.82											3.73	0.88				1.72	0.95	1.82044	0.894894								3.15	0.94
	2.08	1.09				2.22	0.81											2.74	0.64				2.03	0.8	1.8564	0.637663								3.37	0.9
	3.4	2.06				2.82	0.78											2.59	0.49				1.21	1.58	2.69261	1.10327								1.91	1.41
	2.58	0.43				1.75	0.91											2.92	0.53				1.96	0.96	2.05004	1.18873								3.06	0.8
	3.13	1.58				1.65	0.4											2.07	0.81				1.09	1.04	1.73863	0.717993								2.68	0.97
	2.76	0.38				2.73	0.7											3.82	1.17				2.88	0.61	1.9978	1.51903								2.61	0.88
	1.94	0.23				2.44	1.14											4.14	0.83				2.15	1.7	2.27601	0.966605								2.02	0.87
	2.94	1.29				3.03	1.21											3.21	0.88				2.32	0.94	2.59972	1.21101								2.84	0.99
	3.63	1.23				2.16	1.42											2.34	0.73				3.01	1.37	1.37022	0.905995								2.66	0.86
	3.1	1.85				3.14	1.31											3.91	1.33				1.7	0.65	2.44791	0.88549								2.25	0.76
	3.31	1.94				4.35	1.1											3.04	0.51				3.09	0.47	2.14333	0.802169								2.07	0.99
	1.61	2.01				2.06	1.17											2.73	0.53				3.97	0.73	1.82508	0.545044								2.32	0.95
	3.57	1.58				2.38	1.34											3.9	1.13				1.91	0.73	2.74203	1.12342								1.77	0.9
	3.73	1.77				1.92	1.23											2	1.05				3.54	0.41	1.66454	1.38646								2.3	0.73
	3.12	1.31				2.01	0.74											3.4	0.92				4.16	0.93	1.54672	0.855429								1.97	1.28
	3.04	0.49				4.6	1.19											2.43	0.84				3.43	0.41	2.88441	0.829956								1.18	0.83
	3.44	0.35				1.91	1.16											4.09	1.3				1.57	0.27	2.41355	1.22978								1.59	0.83
	2.19	1.58				2.33	1.4											3	1.24				2.1	0.97	2.26535	1.1342								1.73	0.7
	4.27	1.47				2.67	0.65											4	0.67				2.47	1.38	2.32305	0.764776								2.06	0.66
	2.89	1.16				2.59	0.84											1.76	1.77				2.37	1.02	1.74336	1.0184								2.05	0.99
	3.31	1.24				2.24	1.88											2.85	1.28				2.62	0.59	2.85743	0.892434								1.92	1.77
	3.15	0.8				3.04	0.77											2.54	0.66				2.18	0.67	2.00448	0.760153								1.87	1.85
	3.76	1.56				3	0.97											1.75	0.9				1.45	0.45	1.84496	0.825968								1.35	1.76
	2.54	0.17				3.76	1.2											2.14	1.3				2.57	0.84	2.10387	0.639527								2.08	1.26
	2.36	0.15				2.72	1.2											2.73	0.93				1.84	0.99	2.42793	0.983281								1.86	1.14
	3.49	1.43				2.28	0.52											2.37	0.83				3.2	0.91	1.63469	1.15381								1.88	1.29
	2.4	0.55				3.04	1.22											2.23	0.99				1.14	0.7	2.33437	0.954608								2.1	0.99
	2.9	1.13				2.17	0.91											3.79	1.59				2.89	1.6	2.98695	1.02102								2.27	1.02
	2.68	0.76				3.24	0.94											2.41	0.69				1.55	1.14	2.02867	1.0373								3.04	0.95
	4.62	1.47				4.15	0.94											3.05	1.5				3.18	0.34	1.87387	1.42511								1.07	1.2
	1.5	0.68				2.51	1.64											3.26	1.05				2.8	0.41	1.40272	0.498288								2.56	1.23
	3.64	0.89				3.32	0.96											2.24	0.88				3.09	0.67	2.07528	0.859177								1.93	1.18
	2.25	1.6				2.48	0.66											2.26	0.93				2.24	1.1	2.65953	1.09173								1.38	0.88
	1.9	1.61				3.06	0.86											2.62	0.72				2.72	0.84	1.69518	0.598886								1.62	1.12
	2.67	0.88				2.93	1.03											2.09	1.95				2.04	1.2	1.76654	1.16334								2.44	1.11
	3.13	0.51				3.76	1											2.61	0.75				2.51	1.51	2.70387	1.05856								4.09	1.26
	3.01	0.25				3.69	0.82											2.79	1.01				1.87	0.96	2.47953	1.02826								2.18	0.98
	2.1	1.9				2.23	0.62											2.48	0.92				2.54	1.92	2.80473	1.29793								2.53	1.3
	3.15	0.26				4.95	0.74											3.69	1.23				2.24	1.38	2.02215	0.791258								2.19	1.35
	3.46	1.81				2.22	0.78											2.03	1.93				2.42	1.5	2.237	0.834545								2	1.22
	3.75	1.7				3.57	0.96											2.4	0.8				2.9	1.26	2.36753	0.938414								1.13	0.99
	3.63	0.8				2.26	0.86											2.3	0.86				3.64	0.76	2.31526	0.943524								1.76	0.88
	3.06	0.3				2.22	0.4											2.99	1.02				2.46	1.43	1.35416	1.35058								1.75	0.71
	3.22	1.99				1.7	1.09											2.72	0.68				2.24	2.04	2.38144	1.33768								2.02	1.21
	3.06	0.44				3.62	0.98											2.91	0.96				1.82	0.2	1.93478	0.541628								2.33	1.13
	2.9	0.48				3.45	0.62											3.71	1.35				2.74	0.66	1.94175	0.73404								2.8	0.83
	2.46	1.34				3.47	1.24											3.21	1.23				2.58	1.35	2.41383	0.803448								2.75	0.91
	3.24	0.41				4.6	0.89											1.9	1.99				2.64	1.13	2.29135	0.730696								1.58	0.78
	3.71	1.64				1.99	1.16											2.82	0.63				1.65	0.24	2.06035	1.27869								1.55	1.27
	2.63	0.22				3.93	0.79											2.89	0.65				1.9	0.21	2.90146	0.826434								1.89	0.91
	3.47	0.8				3.34	1.51											3.69	1.21				3.09	1.32	2.98237	1.39788								1.98	0.73
	3.06	0.79				2.22	1.4											2.86	0.89				2.39	1.35	1.4386	0.379526								1.82	1.38
	2.73	1.46				4.95	0.7											2.21	0.75				2.49	1.65	1.84191	0.754594								1.57	1.01
	2.91	0.79				2.74	0.79											4.78	0.81				1.66	0.67	2.12509	1.12207								1.7	0.93
	4.56	1.08				2.36	0.99											2.58	0.86				2.5	1.65	1.88027	0.976779								1.53	1.05
	4.52	1.92				4.11	1.02											2.21	0.78				1.48	0.72	2.27152	0.784406								2.92	0.88
	3.33	0.91				3.26	0.63											2.52	0.73				1.58	0.24	1.98132	1.02611								2.97	0.93
	3.34	0.22				3.59	1.13											3.12	0.78				3.97	1.49	2.16764	0.683265								1.46	0.97
	1.53	0.31				3.73	1.03											3.83	1.48				1.87	0.33	1.53111	0.999163								2.03	1.18
	2.95	1.79				2.21	0.98											3.01	0.56				1.23	0.84	1.3792	0.733763								1.7	0.68
	1.68	0.75				2.24	0.96											3.4	1.28				1.7	1.45	2.81747	1.35309								2.48	1.09
	2.04	0.49				3.39	1.35											3.1	0.86				1.64	1.84	1.82439	0.908936								2.67	0.98
	2.08	1.17				2.87	1.02											4.17	1.07				2.42	1.1	1.97345	0.834569								2.12	0.95
	2.54	0.38				2.28	1.37											3.52	1.11				1.1	0.14	2.24555	1.01651								2.77	1.17
	1.73	0.87				1.79	1.06											2.04	1.01				1.67	1.03	2.13312	0.693334								3.62	0.98
	2.55	0.49				3.39	0.99											3.41	0.79				1.69	1.68	2.03335	0.764234								3.48	1.23
	2.38	0.31				4.31	0.77											3.64	0.94				2.14	0.82	2.14767	1.05857								3	1.02
	2.55	0.38				3.14	1.1											3.16	1.49				1.89	1	1.37821	1.18504								1.67	0.68
	2.8	0.37				3.35	1.02											2.13	0.73				1.58	1.44	2.00269	0.855457								1.42	1.52
	2.6	0.23				2.79	1.17											3.51	0.62				1.48	1.13	1.26585	0.7609								1.6	0.97
	3.56	1.81				2.88	0.97											2.96	0.57				2.45	1.27	1.33614	1.13074								2.67	1.15
	2.83	1.3				2.58	0.86											3.13	1.05				1.65	1.03	2.7025	1.55371								1.59	0.82
	2.81	1				3.19	0.87											3.3	1.11				1.58	1.4	2.14283	0.845572								2.59	0.92
	3.1	0.76				2.12	1.2											2.29	1				1.77	1.52	2.19394	1.12229								2.15	0.88
	3.18	2.35				2.19	1.42											5.22	0.9				2.03	0.92	1.61934	1.03401								1.27	0.93
	4.81	0.76				4.12	1.79											3.21	1.7				1.58	1.35	1.45433	0.9223								2.38	1.01
	2.52	0.29				2.07	1.37											3.23	0.46				1.71	1.52	1.83814	1.07895								2.15	1.3
	1.8	1.03				4.67	0.7											3.29	0.9				2.03	1.01	1.41996	1.13175								1.4	0.73
	3.3	1.9				5.41	0.93											4.21	1.3				2.62	1.15	2.17058	0.729468								1.97	1.45
	2.46	0.63				2.21	1.18											3.61	0.96				1.43	0.83	1.64727	1.54689								2.8	0.64
	2.97	1.08				2.81	1.32											4.11	1.52				1.91	1.3	2.37992	1.04047								2.46	0.89
	2.55	0.46				2.34	1.67											2.85	0.75				2.92	1.64	2.97863	1.28807								2.42	0.65
	2.06	0.82				3.45	0.88											2.47	1.15				3.03	0.41	1.8144	1.34749								2.13	0.8
	2.33	1.72				2.32	1.04											2.19	1.05				2.74	0.81	1.87257	0.65982								1.94	1.32
	2.35	1.21				2.44	1.17											3.76	1.3				2.05	1.1	2.17303	0.758419								1.36	1.26
	3.69	1.85				2.46	1.03											2.95	0.84				2.57	0.42	2.37434	0.985441								1.81	2.27
	2.61	0.22				3.94	0.78											4.22	1.21				1.62	1.1	2.0824	0.928492								2.47	0.93
	2.37	1.02				1.79	1.69											2.1	0.97				2.42	1.38	1.22439	1.33816								2.58	0.97
	2.52	1.3				3.83	0.71											2.08	1.15				3.28	0.99	2.0161	0.921634								2.29	0.9
	3.14	0.51				3.52	0.89											4	1.08				1.98	1.33	1.75724	1.03429								3.32	1.01
	3.22	0.23				2.21	1.81											4.49	1.38				2.12	1.07	2.07968	0.883664								1.32	0.81
	2.71	0.23				3.74	0.62											4.46	1.05				3.24	0.9	3.10579	0.853158								2.48	0.87
	2.26	0.99				3.64	0.94											3.23	0.57				2.41	0.44	2.08781	1.04171								2.32	0.7
	2.85	0.22				2.99	1.1											4.76	0.92				1.93	0.22	2.41139	1.33435								1.56	1.18
	2.6	0.2				3.49	0.79											2.54	0.69				2	0.89	2.24056	1.59112								1.56	0.99
	3.45	0.9				1.81	0.59											3.22	1.27				1.57	0.26	1.70441	2.06065								2.88	0.67
	4.48	1.16				4.25	1.17											4.35	0.97				2.94	0.46	2.60456	0.992445								1.51	1.14
	3.07	0.42				2.69	0.87											2.43	0.61				2.12	1.4	2.26906	1.46934								1.89	1.11
	2.33	1.49				2.29	1.1											2.85	0.69				2.2	1.05	1.57483	0.876942								2.2	0.92
	3.02	0.4				3.64	0.56											2.33	0.79				2.54	0.86	1.51978	1.19465								2.63	0.97
	4	1.19				3.21	0.8											2.19	0.88				2.09	1.55	2.54697	1.35827								1.9	1.21
	2.27	0.95				4.06	0.75											2.63	0.66				1.4	0.63	1.52385	0.975742								2.23	0.5
	2.35	1.69				3.29	1.01											3.2	0.6				1.56	0.26	2.73729	1.19637								2.36	1.12
	3.3	0.76				2.52	0.98											3.1	0.6				2.77	1.14	1.97033	0.963981								1.54	1.34
	2.43	0.31				3.09	1.15											2.88	0.58				2.77	0.13	2.04684	1.14841								0.94	0.8
	2.76	1.46				2.37	1.07											3.85	1.24				3.38	0.29	1.65998	0.725801								2.7	1.52
	3.41	1				2.11	1.34											2.12	0.94				1.89	0.98	1.69716	0.692284								1.65	1.19
	5.36	0.33				3.53	1.1											2.85	0.67				1.4	0.58	2.26793	0.806427								1.29	0.95
	2.44	0.67				2.91	1.07											2.7	0.68				3.41	0.77	2.85025	1.12012								2.19	0.94
	3.07	0.66				3.48	1.05											2.85	0.55				1.96	1.59	2.56325	1.61143								1.26	0.98
	1.86	2.15				2.39	1.3											3.89	1.16				2.26	0.71	3.39065	0.858134								1.47	0.76
	3.44	1.43				4.57	0.52											4.1	1.28				1.78	0.34	2.53233	0.837362								1.81	0.94
	2.73	0.32				2.99	1.5											1.98	0.98				2.85	0.31	1.16837	0.634546								2.17	0.97
	3.03	0.35				5.53	1.06											3.89	1.13				1.94	0.43	1.59275	0.900036								1.81	1.29
	2.65	0.63				2.69	1.08											2.75	0.81				2.81	1.54	2.49702	0.744137								2.69	0.93
	2.79	0.22				2.51	1.11											2.69	0.75				2.5	1.32	1.69155	1.41216								1.59	1.16
	2.81	0.4				3.84	0.68											2.6	0.86				1.74	0.57	2.00964	1.4064								2.23	1.23
	3.09	0.25				7.26	0.97											4.45	0.85				2.88	3.33	1.50519	1.66991								1.04	0.76
	1.91	1.93				3.01	1.37											4.45	1.48				2.56	1.12	1.80835	0.943671								1.48	0.75
	2.56	1.05				4.14	1.23											4.77	0.97				2.51	1.26	1.45184	0.430853								1.85	1.22
	3.8	0.98				4.32	0.88											2.8	1				2.05	2	1.82362	1.07459								1.93	1.26
	2.44	1.3				3.66	1.18											4.52	1.17				1.65	1.18	1.67953	0.82679								1.83	1.08
	4.91	0.71				3.27	0.76											2.43	1.32				1.98	1.02	2.2702	0.648698								1.64	0.79
	3.5	1.36				3.92	0.75											4.45	1.09				2.49	1.22	2.69737	1.37114								2.64	0.77
	3.91	1.49				2.63	1.38											1.77	0.94				1.97	1.18	1.73812	0.978808								3.23	1.35
	4.31	0.81				1.84	0.68											3.25	0.96				2	1.8	1.67508	0.715792								1.85	0.97
	2.91	0.28				5.22	1											3.41	0.49				2.05	1.23	2.008	0.76137								1.52	0.99
	5.11	0.67				3.92	1.6											3.89	1.34				1.97	1.61	1.27365	1.23538								2.69	0.98
	2.92	0.55				5.79	1.11											3.19	1.09				2.98	1.22	1.55147	0.928117								2.01	1.17
	3.06	0.13				2.89	1.64											3.66	1.61				2.68	0.17	2.27437	0.965916								2.71	0.9
	2.89	0.24				4.07	1.64											3.65	1.3				1.99	0.96	1.58001	0.915214								2.05	1.22
	2.74	2.54				4.81	0.71											2.7	0.66				2.02	1	2.20271	1.36162								2.89	1.26
	3.58	1.61				4.35	0.81											1.89	1.62				2.64	1.26	2.46049	0.839729								2.34	0.97
	2.12	0.29				2.42	1.41											2.39	0.67				3.33	1.95	1.71386	1.0022								1.83	0.87
	2.26	1.17				2.92	0.75											3.14	1.5				2.96	0.83	2.51383	1.52973								2.41	0.9
	1.56	0.37				2.59	1.03											2.23	0.57				2.4	1.17	1.90053	1.04354								2.68	0.96
	2.73	1.04				3.43	0.95											3.03	0.75				3.87	0.65	1.55993	0.627873								2.22	0.89
	2.76	0.96				2.78	1.32											2.24	1.51				1.86	0.74	1.46906	1.10346								2.3	0.96
	3.19	1.6				2.43	1.19											1.56	1.12				2.96	0.7	2.50199	1.11845								1.79	1.28
	2.82	1.2				2.87	0.77											2.76	0.76				2.83	0.97	1.54293	0.63498								2.22	1.01
	2.73	0.84				2.08	0.79											2.12	0.68				2	1.79	2.86744	1.17603								2.06	1.77
	2.58	0.33				2.4	2.11											2.57	1.16				2.4	0.75	1.96739	0.628869								1.31	0.77
	2.22	0.19				3.22	1.39											3.55	0.67				4.25	1.17	1.45405	0.910463								1.46	1.32
	2.92	0.36				3.2	0.58											2.37	0.6				1.85	0.52	1.93711	0.957565								2.3	1.09
	2.39	0.9				2.3	0.75											2.79	1.21				2.57	0.92	1.6993	1.14122								2.02	0.92
	1.96	0.63				3.39	1.12											3.84	1.21				2.45	1.12	1.95514	1.36147								1.91	1.13
	2.98	0.81				2.68	0.92											2.41	0.82				1.43	0.49	2.18322	1.25699								2.85	0.79
	3.86	1.19				2.65	1.52											3.94	1.37				1.91	0.92	1.34223	0.731984								1.76	0.8
	1.86	0.93				2.89	1.18											2.68	0.72				1.16	0.27	2.46655	1.20869								2.32	0.97
	3.23	1.71				1.91	1.21											2.96	0.7				2.07	1.62	3.48733	0.958139								2.02	0.71
	2.75	0.58				2.13	0.66											3.23	1.16				2.04	1.31	1.82117	1.11572								2.48	0.6
	2.91	1.43				3	0.74											4.67	1.13				2.18	1	2.31163	1.18197								1.5	0.67
	2.26	2.38				3.01	0.94											4.15	1.14				1.54	1.32	1.8766	0.612664								1.88	0.7
	3.27	1.45				1.35	0.76											3.81	1.04				1.67	2.43	1.86146	1.22406								2.96	0.8
	3.74	1.68				2.05	1.18											3.51	1.58				2.83	0.95	1.35881	0.503183								2.43	0.87
	2.84	0.59				3.37	0.97											2.9	0.76				1.97	1.69	1.48385	0.587269								1.91	1.04
	2.17	1.74				2.88	0.84											2.25	1.54				2.18	0.5	1.45018	0.916423								1.97	0.87
	1.91	1.04				2.04	0.7											2.02	1.3				2.29	1.25	1.2768	1.92167								2.92	0.83
	2.59	0.59				2.3	1.01											3.13	0.82				1.58	1.29	1.64108	0.715471								2.49	0.85
	3.82	1.32				3.68	0.51											4.86	1.03				1.47	0.93	1.96857	0.968101								1.68	1.53
	1.97	0.75				2.12	0.91											2.65	0.58				3	1.13	2.57127	1.04428								2.07	0.54
	2.57	1.4				3.32	1.6											3.01	0.74				1.54	1.08	3.233	1.20571								2.29	0.79
	1.9	1.34				2.69	0.93											3.29	0.78				1.54	0.73	2.75255	1.32171								2.49	0.66
	5.44	0.46				6.16	1.08											3.71	0.97				1.52	1.4	3.41603	1.09197								2.01	0.88
	2.45	0.51				5.34	0.75											2.61	1.17				2.56	0.97	3.27471	1.25632								1.85	0.69
	1.75	1.39				2.6	1.89											2.54	1				2.15	1.54	2.57823	0.961714								3.03	1.28
	4.07	1.27				4.45	0.97											4.51	1.12				1.54	1.2	1.71824	0.895416								2.69	1.07
	4.07	1.3				3.66	1.02											3.19	0.85				1.65	0.87	2.13845	1.03513								2.14	1.25
	3.05	0.11				2.53	1.14											1.98	1.77				1.94	1.24	1.84229	0.671461								1.58	1.29
	3.67	1.57				3.64	0.7											2.46	0.78				2.93	0.36	3.08799	0.645116								1.82	1.14
	2.91	1.13				2.5	1.23											2.35	0.68				1.7	0.82	1.29432	0.820887								2.86	1.56
	4.17	1.22				2.64	0.84											2.4	0.81				1.71	1.06	1.14171	1.67254								1.93	1.08
	2.4	0.49				2.78	1.43											3.42	0.58				2.47	1.6	1.61105	2.1208								2.42	0.66
	4.6	1.54				3.04	1.42											2.5	0.55				1.68	0.76	2.31399	0.847576								2.3	1.39
	1.92	1.15				2.44	1.24											2.55	0.79				1.7	1.01	2.37414	0.779079								1.81	0.7
	2.11	1.49				2.91	1.24											4.92	1.24				2.11	1.96	2.2411	0.950997								1.57	0.77
	2.85	0.19				4.31	0.85											2.83	0.57				2.74	0.73	2.12061	0.909736								1.59	0.95
	4.14	1.5				3.79	0.98											2.47	0.84				2.05	1.07	2.99819	1.24881								2.19	1.08
	2.16	1.82				4.13	1.28											2.66	0.79				2.27	1.41	1.2868	1.58264								1.87	0.94
	2.48	0.27				2.62	0.82											2.27	0.85				3.37	0.2	2.06037	1.07232								2.38	0.75
	4.54	1.4				2.34	0.97											3.86	1.13				2.78	1.45	1.27319	0.841453								2.23	1.23
	2.76	1.02				2.63	1.18											4.17	1.2				2.24	0.96	2.51245	1.30829								1.28	1.05
	3.75	1.08				3.42	2.02											2.71	1.11				1.72	1.12	1.62469	1.32876								1.61	1
	2.33	0.38				2	0.83											2.79	1.51				1.4	1.44	1.74799	0.795722								2.01	0.9
	2.66	0.9				3.82	0.77											3.68	0.82				1.48	0.88	2.89314	0.916935								2.1	0.79
	4.19	1.42				4.15	0.82											3.56	0.93				2.51	1.23	1.48283	1.00745								1.2	1.18
	2.93	0.32				3.05	1.06											2.51	0.62				1.19	1.08	1.62867	1.35276								2.82	0.88
	4.8	0.68				2.4	0.53											2.94	0.54				1.91	0.79	2.94512	0.944882								2.94	0.91
	2.32	0.61				3.39	1.52											1.8	1.06				1.26	0.09	1.59265	1.13103								1.88	0.82
	3.56	1.61				2.74	1.38											4.28	0.9				2.42	0.93	2.37315	0.581731								1.23	1.21
	3.53	0.8				3.07	1.33											4.64	0.94				2.14	1.4	2.33461	1.15373								1.81	2.18
	3.06	0.16				5.05	1.17											2.98	0.55				2.21	0.05	1.11663	1.36852								1.99	1.07
	3.37	0.83				2.84	1.11											2.64	0.78				3.45	0.83	1.44197	1.13649								2.76	0.63
	2.42	0.98				2.82	1.04											2.74	0.83				3	1.21	1.88135	0.658331								2.07	0.9
	3.57	0.32				3.47	1.04											3.39	0.86				2.5	1.01	1.64907	0.964177								2.1	0.88
	4.23	2				2.47	0.84											4.65	1.18				2.55	0.64	1.93677	0.722887								1.51	1.53
	2.78	1.01				3.3	0.92											2.31	1.33				1.86	1.34	2.66054	1.0506								1.29	1.03
	4.32	1.44				4.27	0.93											2.8	1.51				1.21	0.4	3.18067	1.03043								3.89	0.87
	3.99	1.32				4.87	0.85											3.57	0.6				2.01	0.51	2.22379	1.08628								2.06	1.13
	2.77	0.87				3.32	0.59											2.56	0.74				3.33	0.61	2.30811	0.813261								2.45	0.79
	1.85	0.63				2.27	1.49											3.77	1.35				1.36	0.47	1.50687	1.42215								1.25	1.08
	2.41	0.24				2.97	0.78											2.43	1.32				1.51	0.28	1.59003	0.877663								1.75	0.79
	2.94	1.01				4.12	0.8											4.73	1.17				1.97	1.88	2.35719	0.913413								1.22	1.27
	4.38	0.81				3.16	0.8											3.1	0.78				3.13	1.03	2.18229	0.792435								3	1.23
	1.65	0.6				4	0.78											4.17	1.24				2.79	1	2.19135	1.39831								2.25	0.76
	2	3.36				2.73	1.48											3.4	1.31				2.39	0.85	1.57358	0.827022								2.69	1.02
	1.74	0.96				4.59	0.78											3.85	0.99				2.58	0.14	1.65966	0.835529								1.87	1.42
	2.99	1.4				2.62	1.24											3.77	1.26				1.51	0.1	2.18051	0.813774								1.78	1
	2.76	2.05				2.8	0.81											2.23	1.16				1.61	0.71	2.68078	1.25133								1.97	0.74
	2.62	0.64				2.25	1.21											3.14	0.65				3.33	1.82	1.47279	0.979428								2.25	0.88
	2.13	2.88				1.61	0.88											3.84	1.36				2.1	0.9	1.99765	0.721939								1.53	1.66
	4.32	0.87				1.91	0.83											3.48	1.26				2.2	1.73	1.327	0.606954								2.39	0.9
	3.26	0.8				1.59	1.4											3.15	0.67				1.66	0.95	1.45734	1.4424								1.5	0.98
	3.22	1.05				1.75	0.6											1.98	1.56				2.71	0.05	2.02949	1.29971								2.44	0.97
	3.51	1.22				1.77	0.6											2.66	0.65				2.82	1.03	1.23524	0.883492								2.16	0.89
	3.15	0.25				2.19	1.37											2.57	0.54				2.4	0.99	1.20548	1.10442								2.99	1.39
	4.38	1.64				2.79	0.58											5.04	0.95				2.26	1.64	1.52544	0.956426								2.83	1.04
	2.08	1.88				1.68	0.36											2.5	0.58				2.34	0.59	2.82168	1.46796								1.95	1.09
	2.47	0.4				3.2	1.62											3.08	0.84				1.55	0.35	1.43926	0.829296								1.29	1.36
	3.21	0.41				3.54	1.05											2.62	0.77				1.79	0.55	2.00964	0.977504								2.59	0.68
	3.12	0.94				1.85	1.23											3.82	0.88				1.88	0.23	2.10504	0.959659								3.18	1.28
	1.92	0.83				2.49	1.17											2.85	1.28				2.79	1.46	2.55906	0.839979								2.05	1.33
	4.63	0.71				2	0.86											2.48	0.84				2.28	0.81	2.87397	0.962831								2.78	0.85
	2.8	0.55				2.02	1.74											2.77	0.69				1.45	0.54	1.67604	1.20924								1.84	2.1
	2.96	0.28				1.65	1.57											3.75	1.06				3.52	0.21	2.07327	0.82137								2.67	0.73
	5.93	0.21				3.06	0.71											3.29	0.91				2.24	1.25	1.97235	0.625108								1.75	0.77
	3.71	0.82				1.71	0.58											2.53	0.78				2.8	0.86	1.81605	0.822588								1.55	1.11
	2.24	0.98				2.59	2.41											2.6	0.6				2.49	1.24	2.4077	1.3231								1.75	0.93
	2.51	0.58				2.66	1.12											2.73	1.02				2.21	1.73	1.29342	0.94107								1.89	1.07
	5.56	0.92				2.08	1.03											2.45	0.83				2.48	1.48	3.00106	0.905052								2.36	0.72
	3.49	0.78				3.68	0.82											2.96	0.67				3.82	0.77	1.38805	0.710255								2.39	0.85
	1.7	2.25				2.2	1.34											3.04	1.13				1.94	0.91	1.64662	0.998921								1.42	0.93
	3.25	2.02				4.1	0.96											3.4	0.81				2.57	1.04	1.36919	0.639911								2.66	0.81
	2.26	1.31				2.81	0.62											2.53	0.89				2.42	1.26	1.79443	0.573481								1.67	1.05
	3.77	1.87				2.68	1.07											2.2	0.94				3.07	1	1.42095	0.625879								2.08	1.21
	3.13	0.26				2.63	1.58											2.81	0.77				2.14	0.91	1.98015	0.710563								4.9	0.86
	2.92	0.58				2.67	1.14											3.69	1.19				1.37	1.24	1.14903	0.732542								1.85	0.53
	5.4	0.52				2.57	1.29											3.53	1.08				1.76	2.02	2.47041	0.660602								4.34	0.76
	2.93	1.15				3	0.87											2.05	1.05				1.15	0.69	2.16776	1.12478								2.6	0.58
	2.56	0.48				2.51	1.57											3.49	1.85				1.67	0.56	2.75119	0.966166								1.39	0.63
	3.43	0.77				3.08	1.27											4.13	1.42				2.27	0.77	1.97372	0.968389								3.25	1.22
	4.1	17.08				1.56	0.56											3.15	1.67				1.79	1.13	1.7035	1.2758								2.94	1.4
	3.7	1.06				2.14	0.54											2.24	0.68				1.4	0.33	1.6434	1.02344								2.33	1.14
	3.47	1.4				2.35	2.01											2.58	0.76				2.22	0.91	1.44117	1.51394								2.23	0.89
	4.02	1.27				4.83	0.78											3.88	1.26				1.93	0.79	1.36836	0.645751								1.3	1.13
	3.09	0.27				3.78	1.15											1.92	1.14				1.96	0.41	2.32753	1.00856								1.37	1.69
	2.49	0.24				2.71	1.16											2.49	0.68				1.53	0.43	2.18546	0.701103								2.07	1.2
	2.2	1.42				2.63	0.95											1.44	0.85				1.57	0.3	1.85013	1.22091								1.27	0.98
	3.89	1.45				2.17	1.04											3.24	1.75				1.84	1.95	1.16659	0.77178								1.97	1.5
	2.51	0.29				2.61	0.9											4.02	1.27				3.34	1.07	1.91382	0.570679								2.08	0.71
	2.39	0.77				4.79	1.13											2	1.02				1.76	1.12	2.46301	1.43873								1.81	0.87
	3.02	0.4				2.66	0.88											3.97	1.19				1.7	1.86	1.8377	1.50208								3.1	1
	3.15	0.45				2.38	1.2											3.18	1.1				2.81	0.32	1.86419	0.5734								1.62	0.92
	2.62	0.75				3.35	1.03											2.12	1.04				1.16	3.14	1.89092	0.545099								1.44	1.96
	2.12	1.18				2.89	1.09											3.36	0.92				1.17	1.37	1.40275	1.15294								2.12	1.03
	3.06	0.62				3.33	1.22											2.75	0.52				2.28	1.46	3.67918	0.875799								2.01	1.01
	3.06	0.32				3.23	1.1											1.73	1.3				1.37	0.17	2.53181	0.849455								2.78	1.06
	3.67	1.09				4.47	0.88											1.96	1.71				2.52	1.64	2.06008	0.840297								1.97	0.74
	2.13	1.21				3.52	0.43											2.75	1.28				2.01	1.44	1.33289	0.887452								1.84	0.78
	3.48	1.15				2.79	1.43											3.14	1.76				1.33	0.14	1.57057	1.07789								1.47	1.73
	3.76	1.22				2.86	1.8											4.38	1.58				2.1	1.07	1.68801	1.91532								1.41	1.14
	2.52	1.17				4.98	0.61											2.88	0.72				2.74	1.72	3.00131	0.697957								2	0.94
	3.04	0.23				3.22	1.15											2.23	0.85				2.2	1.85	2.44244	0.831131								1.77	1.15
	2.21	1.68				4.2	0.93											3.15	1.02				3.03	1.23	2.67056	1.21074								2	0.71
	2.99	0.54				3.78	0.86											2.68	0.75				2.09	1.28	1.93841	0.914206								1.2	0.94
	3.09	0.95				1.5	0.92											3.99	1.28				1.83	2.04	2.68226	1.46054								1.75	0.76
	3.8	0.25				2.09	0.95											2.82	0.7				1.68	1.02	2.09832	0.92611								2.67	0.76
	2.74	0.55				2.53	0.97											2.55	0.62				2.31	1.1	2.80696	0.885111								2.31	0.9
	3.62	0.37				2.83	0.86											2.97	0.58				1.72	0.43	1.74253	0.909886								2.9	1.44
	2.24	0.43				1.99	1.07											3.2	0.87				1.7	1.34	2.40217	0.779409								1.75	0.71
	3.65	1.17				3.06	0.86											2.03	1.07				3.05	0.92	2.19235	1.04755								1.99	0.77
	1.48	2.28				3.77	0.81											4.09	1.35				2.67	1.46	2.74733	1.19239								1.57	0.73
	3.48	1.74				3.91	0.63											1.88	1.03				3.67	1.13	2.35749	0.667009								2.25	0.85
	2.81	1.39				3.12	1.18											2.34	1.17				2.62	1.19	1.60046	1.26069								1.85	1.16
	2.98	1.12				3.69	0.7											3.05	0.67				2.44	1.71	1.35156	1.08842								2.91	0.83
	3.68	1.44				3.31	0.75											2.32	0.98				1.9	0.8	2.34803	1.16023								2.58	0.79
	3.05	1.56				1.81	2.21											3.34	1.08				2.9	1.65	2.37415	1.3134								1.77	1.25
	1.76	1.52				2.11	0.7											5.35	0.92				1.31	2.76	1.50386	1.10231								1.89	0.69
	2.43	0.15				2.94	1.32											2.31	0.95				1.58	0.86	1.74924	0.750682								3.42	1.01
	1.89	1.79				3.09	0.79											2.12	0.67				1.71	0.98	2.22692	1.0022								1.79	1.09
	2.4	0.44				4.3	0.65											2.16	1.42				2.73	1.02	2.68261	1.37057								1.49	0.8
	1.97	0.52				2.22	1.13											4.06	1.26				1.57	1.44	0.895545	0.714167								1.83	0.73
	2.05	0.75				2.82	1											1.87	0.57				3.49	0.69	1.45268	1.01858								1.67	2.7
	3.95	1				2.08	0.85											3.44	1.15				1.79	0.6	2.3285	0.957104								1.85	0.94
	2.51	0.69				3.48	1.07											3.27	0.84				2.45	1.37	1.64635	0.917448								3.75	0.84
	1.6	0.59				3.1	0.86											2.14	0.75				3.25	1.7	3.12594	1.1249								1.48	1.29
	1.68	2.03				1.89	0.62											1.65	1.52				2.48	0.78	2.41328	1.02292								1.63	1.46
	2.24	0.61				2.69	0.98											4.73	0.75				2.42	1.32	1.50629	1.27891								2.55	1
	2.77	0.72				2.42	0.85											3.96	0.88				1.81	1.48	1.58099	0.945494								1.83	0.98
	1.79	0.58				3.7	0.64											2.35	1.02				3.68	0.45	1.62092	0.825127								1.92	1.05
	2.19	0.92				3.19	1.13											5.27	0.74				2.63	1	2.29326	1.30668								2.48	1.16
	2.65	0.48				2.6	0.67											2.22	1.61				1.81	0.46	2.08798	1.69651								2.86	1.25
	2.52	0.3				2.71	1.34											3.47	1.42				2.13	1.16	1.81754	1.69421								1.62	1.2
	2.25	1.62				1.79	0.66											4.46	1.42				1.36	0.52	1.2705	0.776676								2.98	0.88
	3.92	0.73				2.7	1.37											2.13	0.67				2.92	1.14	2.02361	1.06063								2.76	0.89
	4.02	1.72				2.47	1.07											2.85	1.06				2.97	1.05	2.55456	1.41895								3.14	0.77
	3.68	1.57				4.77	0.89											3.6	1.57				1.8	1.08	1.99884	0.681774								2.85	1.16
	3.68	1.48				2.63	1											2.69	0.49				1.6	1.04	1.64022	0.762195								2.63	1.43
	2.63	0.63				3.06	0.71											4.1	1.26				1.77	1.35	1.7192	1.7332								1.75	1.54
	2.86	0.31				2.33	1.39											4.3	0.83				3.05	1	1.36413	0.599087								2.23	0.78
	2.69	0.92				2.02	0.73											3.21	1.32				3.51	0.5	2.37639	0.851197								2.7	0.96
	3.86	1.11				1.67	0.91											3.77	0.65				2.64	1.21	2.70314	1.35405								1.66	1.07
	2.46	1.18				2.23	0.99											3.09	0.71				1.4	0.37	1.45339	1.86564								1.74	0.77
	3.77	1.89				3	1.24											2.73	0.54				2.18	1.75	2.36098	1.1896								2.16	0.95
	2.68	0.92				2.57	1.4											4.07	1.65				1.99	1.42	2.63651	1.53404								2.26	0.71
	2.6	1.32				3.42	1.12											2.75	0.71				2.64	1.87	2.79881	1.36299								2.09	1.35
	2.64	0.26				2.7	1.52											3.83	1.32				2.05	1.88	2.21258	1.3562								1.62	0.81
	3.17	0.23				3.49	0.96											4.56	1.06				2.05	1.12	1.77584	0.859704								1.69	0.83
	3.25	0.34				3.26	0.72											3.44	1.29				3.05	1.13	1.81764	1.55477								1.89	1.22
	2.63	0.68				3.75	1.22											2.51	0.8				2.51	0.97	2.493	1.20252								1.61	1.24
	2.62	0.49				3.23	1.71											3.19	1.2				1.55	0.19	2.17992	1.31037								2.56	1
	3.47	0.75				2.51	0.65											2.7	0.91				1.62	1.34	1.89481	0.553541								2.21	1.25
	3	0.26				4.31	1.06											2.15	0.9				1.56	2.01	1.93626	0.784246								2.66	1.24
	3	1.46				2.33	1.17											3.08	1.43				1.58	0.75	2.42577	1.29997								1.76	0.59
	3.88	1.17				3.46	0.81											2.69	0.84				1.68	0.36	3.03884	1.14552								2.24	1.15
	3.86	1.22				2.74	0.86											3.52	1.13				2.38	0.1	1.69223	0.94008								2.23	0.94
	2.1	1.1				3.05	0.81											2	0.93				1.55	0.88	1.44564	1.00379								1.91	1.19
	2.78	1.41				3.35	0.97											4.35	0.98				1.37	0.4	2.59552	1.00883								1.17	0.74
	3.08	0.16				3.27	0.68											3.4	1.09				2.78	0.68	1.48907	0.878937								1.13	0.56
	3.38	0.53				2.51	0.72											1.82	0.91				1.37	1.48	1.36929	1.17349								1.75	0.79
	3.31	0.71				4.43	0.64											4.12	1.11				2.82	0.39	1.88276	1.02069								1.65	1.37
	2.23	2.67				2.06	0.95											2.58	0.73				1.63	1.91	2.69244	1.60898								2.6	1.03
	3.08	0.2				2.91	1.65											3.48	0.84				2.55	0.85	1.24214	1.3237								1.51	1.33
	2.84	0.39				2.7	0.94											3.65	1.47				2.54	0.21	2.71098	0.958157								1.37	0.81
	3	0.23				2.24	1.21											2.7	1.02				1.56	0.33	1.21793	0.777853								1.1	1.33
	2.85	0.21				3.12	1.71											3.16	1.32				1.36	0.37	1.70203	1.05089								1.66	1.32
	1.99	1.55				3.09	0.87											2.9	1				1.35	0.2	2.29329	1.13193								2.1	0.97
	2.68	0.21				2.88	0.73											2.51	0.89				1.77	0.84	1.34824	0.708453								3.16	1.1
	3.01	0.55				3.87	0.95											3.1	1				2.48	1.1	1.54901	1.04078								2.02	0.8
	3.23	1.28				4.46	1											2.34	1.12				1.69	1.63	1.17669	1.41673								2.36	1.18
	3.61	1.75				3.33	1.45											1.54	0.89				1.91	2.06	1.75606	0.906549								2.52	0.71
	3.33	1.91				2.63	0.8											2.9	1.33				3.03	1.01	1.38227	1.02771								3.04	1.3
	3.98	1.44				2.32	1.68											1.9	1.64				1.48	0.23	1.99622	0.836383								1.72	0.94
	4.1	1.45				2.28	0.96											3.62	1.23				1.56	0.85	2.57055	0.732604								2.6	0.71
	2.16	1.72				2.52	1.53											1.59	1.1				1.66	1.33	2.20584	1.24186								2.16	1.07
	2.66	0.75				3.21	1.51											3.02	1.05				2.93	0.28	3.99471	1.2528								1.5	1.08
	3.34	0.95				2.2	1.22											2.41	0.62				2.6	1.21	1.73296	0.727116								2.66	0.9
	4.49	0.93				2.17	0.85											2.24	1.52				2.05	1.66	1.66331	0.840029								2.14	0.84
	3.23	0.37				2.32	0.8											3.36	0.83				2.12	0.63	3.0724	1.16639								1.36	0.91
	3.12	1.24				1.7	0.67											2.87	0.62				1.75	0.66	1.85501	0.989936								1.75	0.67
	4.21	2.01				3.11	1.08											2.35	1.04				1.64	0.5	2.36427	0.655951								2.96	0.78
	2.03	1.18				2.24	0.77											3.55	1.33				1.76	0.64	2.5038	1.26049								2.38	0.85
	4.24	0.91				1.76	0.4											3.7	1				2.53	2.1	2.44653	1.07763								1.83	0.94
	2.6	1.15				2.34	0.9											3.1	0.61				1.95	1.02	1.64735	0.957918								2.79	0.93
	3.13	0.34				1.98	1.02											2.05	0.82				1.63	0.82	2.02643	1.06186								2.41	0.86
	2.77	0.13				2.04	1.12											3.46	0.88				1.78	1.1	2.48535	1.1297								1.79	1.51
	2.32	0.02				2.3	0.82											4.44	1.25				2.46	1.12	1.43982	1.02846								1.8	0.68
	3.51	1.11				2.26	1.18											3.56	1.3				1.22	0.59	1.98137	0.631981								1.7	1
	3.7	1.18				2.82	0.99											2.88	0.7				1.54	0.25	1.98315	0.936759								1.91	0.64
	2.98	0.65				3.64	0.82											3.99	1.24				2.64	0.7	2.88543	1.12308								2.12	1.15
	3.82	1.58				1.92	0.57											1.75	1.28				3.06	0.32	1.56717	0.572346								5.14	0.82
	3.81	1.21				3.33	0.92											2.32	0.67				1.65	0.35	1.90231	1.05166								2.45	1.19
	1.99	0.57				3.67	0.58											2.91	1.05				2.78	0.87	1.0871	1.42772								2.03	0.77
	2.25	0.34				3.73	0.83											2.47	0.75				2.35	1.34	1.67265	1.95899								1.43	0.88
	2.68	1.83				2.5	0.76											1.89	1.33				2.44	1.61	2.4409	1.60451								1.88	0.76
	3.29	1.9				2.2	1.34											2.6	1.05				2.82	0.99	2.33812	1.14198								2.47	1
	3	1.49				2.21	1.12											3.22	1.27				2.06	1.28	2.37621	0.684822								2.28	0.86
	2.82	0.86				3.49	1.18											3.03	1.18				3.3	1.64	2.02764	0.816754								2.11	0.58
	4	0.65				3.31	0.58											3.25	1.98				3.24	0.43	2.23104	1.16331								3.01	0.86
	1.65	1.58				1.8	1.28											3.53	0.86				2.32	1.32	1.95617	1.17968								1.74	1.1
	2.55	0.53				1.91	1.98											3.98	1.22				2.58	1.28	1.84781	1.06175								2.67	0.9
	2.68	0.7				2.44	1.18											2.81	0.64				1.8	0.79	1.59507	0.941904								3.18	0.82
	2.7	0.85				2.28	1.02											2.32	1.11				2.53	1.07	2.25898	0.342121								3.25	0.84
	2.03	1.17				2.01	0.97											1.94	1.52				3.37	1.62	2.17289	0.584961								1.47	0.96
	2.44	1.07				3.54	0.87											3.51	1.19				3.99	0.13	1.47024	0.961021								3.08	0.94
	2.65	2.97				2.52	0.79											2.04	1.25				1.73	1.64	2.15071	0.678146								1.23	1.3
	1.94	1.92				2.15	0.98											3.52	1.25				2.2	1.44	1.55111	0.94961								2.29	1.04
	4.57	0.82				2.3	1.15											1.79	1.26				2.86	0.64	2.67609	1.02075								2.22	0.72
	3.74	1.05				4.49	0.53											4.14	1.18				2.72	0.49	2.55002	1.01584								1.76	0.79
	1.91	1.41				2.03	0.6											3.75	1.48				1.34	0.93	2.52003	0.780904								1.96	1.34
	2.3	1.29				2.12	0.69											3.03	0.5				1.55	0.45	1.85883	0.880342								1.92	0.6
	2.42	0.52				3.88	1.01											3.73	0.79				2.48	1.11	2.05397	1.0004								2.14	1.15
	2.2	1.71				3.96	0.48											2.4	1.14				3.25	0.79	3.02229	0.72098								2.58	1.15
	2.25	0.53				3.81	1.09											2.92	0.63				3.49	0.19	3.08687	1.10927								1.67	0.78
	2.34	1.31				2.67	1.04											2.21	0.94				2.19	0.3	1.71777	1.75769								2.88	0.67
	1.77	2.47				3.17	1.11											2.14	1.69				2.33	1.63	2.27253	1.27181								1.93	0.48
	3.24	0.59				4.27	0.59											2.9	0.52				1.48	0.97	2.7118	0.79832								1.71	0.89
	2.02	1.92				3.17	1.6											2.98	1.58				1.85	1.11	2.47939	1.257								2.81	1.08
	3.43	1.74				2.88	1.29											3.08	0.82				2.1	0.81	4.12804	1.03078								2.49	0.72
	2.62	0.69				4.28	0.8											3.66	1.26				5.25	0.28	2.81282	0.908281								1.46	1.3
	3.42	1.83				3.31	0.94											3.2	0.91				1.21	0.45	3.09976	0.755714								2.12	1.1
	2.97	0.57				4.48	0.74											2.94	0.71				1.49	1.05	2.38695	0.987332								1.2	1.58
	3.16	0.56				3.89	1.54											3.51	1.18				1.66	1.36	1.99436	1.06214								1.91	0.98
	3.28	0.52				2.67	1.08											2.64	0.75				1.3	0.87	2.48428	1.34285								2.31	1.11
	3.07	1.14				3.01	0.96											2.71	0.63				1.21	0.72	2.53334	1.26395								2.84	0.98
	4.27	1.11				3.34	1.25											2.67	1.16				1.79	0.82	2.08272	0.707072								2.52	1.1
	2.72	1.3				2.82	0.64											2.78	0.59				1.32	1.03	2.14684	0.847526								2.41	1.16
	2.95	0.69				3.38	0.88											3.27	1.29				2.55	1.22	1.86773	0.925113								0.98	1.27
	3.48	1.05				3.17	1.3											2.34	0.92				1.5	2.4	1.41626	1.007								2.02	0.83
	3.05	0.17				3.12	0.97											3.66	0.94				1.66	0.48	1.77744	1.32291								1.67	1.26
	3.04	0.33				3.28	0.85											2.37	1.11				2.05	1.09	2.80296	0.758524								1.94	0.86
	2.75	0.3				3.61	0.99											3.75	1.2				2.63	0.19	2.41795	1.12336								1.35	1.01
	3.66	2				4.24	0.84											2.37	0.86				2.58	0.26	2.17891	1.30113								2.03	1.84
	3.57	1.51				2.53	0.89											3.55	1.18				1.56	1.11	2.30085	1.34944								1.9	0.95
	3.5	1.17				2.14	1.2											2.03	0.98				1.08	0.26	2.27968	1.08914								1.63	0.78
	3.62	1.36				2.87	1.02											2.43	1.03				2.29	1.84	2.05693	1.08804								2.28	0.54
	3.47	1.71				3.06	1.11											2.09	0.96				2.08	1.26	1.90493	1.14232								2.53	0.67
	4.38	1.78				4.85	0.99											2.1	1.46				1.61	0.94	1.83585	1.19318								1.59	1.1
	3.4	1.91				2.56	1.42											2.85	0.68				2.18	1.05	2.4975	1.45097								2.48	0.84
	1.88	1.52				4.12	0.96											3.37	0.62				2.09	2.02	2.94337	1.04832								2.25	0.54
	1.84	1.13				4.02	0.73											1.83	0.86				2.49	1.14	1.67832	1.48927								1.59	1.37
	2.12	1.36				3.28	1.43											2.97	0.74				1.38	0.13	2.31617	1.11026								2.51	0.82
	3.12	0.34				3.57	1.27											2.91	0.62				1.17	0.79	1.7485	0.811344								1.95	1.16
	3.1	0.67				2.95	1.03											2.6	0.8				2.3	0.77	1.2545	1.63656								1.97	1.09
	2.55	0.79				2.48	0.94											2.09	0.93				3.04	0.48	2.23776	1.21721								2.45	0.74
	3.95	0.52				3.21	0.8											2.94	0.93				2.16	1.23	2.51423	1.01205								2.26	0.92
	3.03	0.34				4.07	0.83											3.63	1.48				2.11	1.31	3.105	0.80086								2.01	1.28
	1.77	0.22				4.34	0.94											2.33	0.84				2.18	0.88	2.7518	1.268								1.4	0.82
	3.26	0.47				5.2	1.33											2.07	1.17				1.34	0.72	2.77492	0.921587								1.85	0.65
	3.94	1.12				3.46	0.64											2.85	1.43				2.21	1.01	2.43591	0.716619								2.49	0.64
	5.07	0.94				3.02	1.24											2.54	0.95				1.72	0.48	1.85003	0.698495								2.06	0.72
	3.5	1.52				3.8	0.98											4.59	1.26				2.5	0.68	1.73487	1.65869								2.47	1.03
	2.52	1.92				3.14	0.99											2.4	0.98				1.2	0.81	2.14892	1.05939								1.9	0.88
	2.36	1.29				3.76	1.27											2.09	1.21				1.37	0.61	2.63004	1.15325								1.27	0.68
	2.75	1.01				4.24	1.33											2.29	1.48				2.34	1.3	3.02352	1.16132								1.72	0.85
	3.46	0.69				3.9	0.93											2.1	0.86				1.98	2.21	1.93189	0.752242								3.08	0.9
	3.53	0.35				3.5	1.3											2.98	0.77				3.99	0.64	2.50708	0.976253								1.39	1.5
	3.72	0.92				2.78	0.98											2.53	0.78				2.25	0.66	1.62539	0.894157								2.13	1.18
	3.26	1.64				3.02	1.04											3.38	1.05				2.26	1.23	1.32292	0.552473								1.35	0.61
	4.4	1.11				3.61	1.16											3.34	1.06				1.9	0.42	2.24207	0.896407								1.86	0.45
	3.13	0.6				1.94	1.15											2.82	0.61				2.65	0.87	1.87787	1.32441								1.99	1.11
	2.23	0.18				2.63	0.68											2.83	0.75				2.03	0.6	1.96054	1.32274								1.91	1.14
	3.1	1.3				2.28	1.14											2.65	0.53				2.95	0.54	2.89917	1.22707								2.55	0.93
	2.44	0.23				2.25	1.06											2.95	0.55				2.36	1.31	2.23256	0.542265								2.87	2.18
	3.34	1.58				2.1	0.81											4.28	1.23				1.46	2.13	2.45424	0.837414								1.55	0.75
	2.28	0.45				2.41	1.57											3.73	1.42				2.12	1.33	1.85821	0.835061								2.64	1
	3.08	0.95				1.7	1.12											2.28	1.06				2.19	1.19	2.80624	1.10456								2.59	1.07
	2.56	0.79				1.99	0.94											3.53	0.83				1.57	0.8	1.72038	0.836079								2.73	0.89
	2.51	1.12				1.55	1											3.95	1.11				1.91	1.23	1.95127	1.03316								2.45	0.68
	1.78	1.68				2.36	1.59											3.71	1.2				3.45	0.17	1.97568	0.956455								2.46	0.86
	2.82	0.79				2.24	0.99											2.32	0.83				3.5	0.48	2.02595	1.22082								1.28	1.21
	1.73	1.47				4.29	1.07											1.99	1.31				1.47	1.38	1.93965	0.775639								2.87	0.84
	1.99	1.18				1.86	0.48											3.23	1.82				2.75	0.97	2.06162	1.20382								1.54	1.52
	2.6	0.24				2.75	1.18											2.32	0.9				1.77	1.06	1.61796	0.967041								3.29	1.47
	2.04	1.08				3.9	0.85											2.44	0.7				2.39	1.05	2.94551	1.39223								1.54	0.73
	1.73	2.67				2.04	1.36											2.87	0.96				1.48	0.2	2.66287	1.1501								2.82	1.14
	2.7	0.25				4.31	0.87											3.27	1.03				3.13	0.91	2.61315	0.883401								2.51	0.81
	2.38	0.82				3.07	1.17											2.96	1.43				1.93	0.25	1.90341	0.75776								2.23	0.81
	3.52	1.42				2.43	1											2.32	0.92				2.38	0.68	1.76644	0.953492								2.2	1.03
	2.15	2.48				2.7	1.17											2.98	0.79				1.45	2.56	1.66152	0.757929								1.76	0.69
	4.08	2.24				2.26	0.88											2.91	1.56				2.01	1.04	1.83882	1.33672								1.78	0.73
	2.95	0.18				1.74	1.89											1.72	1.35				1.91	0.88	2.19994	1.04029								3.01	1.1
	5.08	0.72				3.24	1.21											2.46	1.04				2.91	1.1	2.73975	0.70842								2.85	1.01
	2.86	0.51				2.47	1.28											3.35	1.3				2.27	1.17	2.69196	0.917446								2.34	0.94
	2.53	1.02				3.23	1.28											3.45	1				2.07	1.37	2.29548	0.830413								2.43	0.56
	2.8	0.35				1.83	1.08											2.77	0.69				1.75	1.07	1.55274	0.779278								3.68	1.16
	2.67	0.32				3.35	1.15											2.58	0.65				2.1	1.18	2.17423	1.00029								3.21	1.05
	2.54	1.63				3.67	0.79											2.85	1.42				2.27	1.58	3.28387	1.29849								2.35	1.63
	2.62	1.11				3.27	1.24											3.75	1.74				1.25	0.45	1.83255	0.728845								1.37	0.63
	2.77	0.65				3.46	0.46											3.63	1.73				1.54	0.24	1.50326	1.34059								1.36	0.86
	3.44	0.33				2.77	1.44											3	0.82				1.32	0.79	2.44731	1.29039								1.32	1.27
	3.95	0.96				4.04	0.49											3.77	1.64				1.53	2.54	1.75124	1.06768								2.06	0.99
	3.96	1.9				2.85	0.45											4.62	1				1.57	2.58	1.59383	0.712215								1.76	0.83
	3.47	0.37				2.34	1.17											2.98	0.86				2.82	1.25	2.80163	1.22642								2.68	0.75
	3.73	1.27				3.61	0.99											2.61	0.73				3.74	0.18	2.47295	1.06938								1.5	1.02
	4.1	1.25				3.57	1.07											3.31	1.52				2.8	1.09	1.776	0.20413								2.28	0.84
	2.59	0.13				2.54	1.3											2.75	0.92				2.46	1.8	1.49056	0.752109								3.83	0.97
	2.7	1.01				2.2	1.16											2	1.58				2.09	0.86	2.24572	1.38017								2.85	0.66
	1.99	2.61				3.47	1.08											3.23	1.26				2.18	1.21	2.26957	1.07741								2.69	1.06
	5.57	1.31				2.95	0.72											3.91	0.89				2.05	1.06	1.8102	0.488977								1.54	1.14
	1.74	1				2.16	0.18											3.04	1.15				2.32	1.32	1.30194	1.30817								2.8	1.47
	2.14	1.59				2.55	0.9											3.21	1.22				1.32	1.74	1.85322	1.40126								1.57	1.05
	3.25	0.4				3.46	0.62											1.57	1.2				1.35	0.62	2.14078	0.586493								1.61	0.84
	3.8	1.77				2.51	0.65											2.45	1.62				1.65	0.09	2.11764	0.503046								1.71	1.08
	3.7	0.74				2.54	0.58											2.85	1.13				2.73	1.14	2.42894	0.930249								1.8	0.67
	1.97	0.67				3.28	1.24											1.81	1.02				3.44	0.49	3.50731	1.02984								2.87	1.35
	1.83	1.15				2.04	0.46											3.02	0.92				3.26	0.29	2.08131	0.834173								1.44	1.31
	3.01	1.07				3.05	1											2.28	0.93				2.39	2.17	1.86813	0.673923								1.62	1.06
	1.85	1.59				3.41	0.89											3.1	1.13				2.11	1.21	1.86037	0.766341								1.24	0.97
	2.41	0.88				3.32	0.83											3.83	1				5.12	0.05	1.19202	1.40678								1.6	1.15
	2.5	0.7				2.71	1.13											2.44	0.71				2.72	1.27	3.05003	0.591354								4.42	1.04
	2.52	0.98				4.51	0.71											3.5	0.49				2.89	1.03	2.22107	0.443732								1.89	1.06
	2.76	0.61				3.12	1.23											2.3	1.61				1.3	2.39	1.69233	1.12652								2.14	0.94
	5.47	0.58				3.24	1.2											2.85	0.78				3.25	0.09	3.22441	0.797697								1.56	1.07
	2.15	1.53				4.62	1.14											2.46	0.44				1.91	0.51	1.79256	0.961437								2.32	0.84
	3.8	1.73				2.21	1.18											3.71	1.66				1.91	1.37	1.76882	1.19192								1.61	0.64
	3.57	0.9				2.17	1.46											2.09	0.73				2.13	1.91	2.65825	1.03806								1.52	1.03
	3.86	1.51				3.02	1.27											2.59	0.98				1.5	0.96	2.37902	0.863259								1.41	1.24
	2.41	1.46				3.82	1.26											3.06	0.59				2.21	1.34	2.31137	1.0532								3.19	1.02
	3.34	0.54				2.16	1.26											3.21	0.87				1.55	3.53	2.08118	0.570377								2.32	0.86
	2.56	1.25				3.7	1.38											2.57	0.85				1.36	1.77	3.1801	0.766299								2.19	0.9
	3.47	0.87				2.58	1.9											2.37	0.52				1.48	0.67	2.36058	1.70633								1.86	0.9
	3.26	1.17				4.12	0.57											3.51	0.78				3.37	1.28	1.86573	1.3483								2.15	1.14
	2.42	0.46				4.4	1.1											2.24	1.66				2.18	1.86	2.30576	1.08494								2.54	0.71
	2.29	1.06				2.26	0.95											2.44	1.71				2.3	0.48	2.15418	1.03648								2.79	0.99
	2.45	0.36				3.57	1.3											2.12	1.63				1.48	1.26	2.15876	0.786016								1.94	0.92
	2.83	0.75				4.63	0.97											2.46	1.68				1.78	1.54	2.19968	1.47882								2.38	0.69
	3.39	1.1				3.56	0.75											2.31	1.26				1.26	0.9	2.52084	0.745178								2.29	1.13
	2.61	0.14				2.35	1.31											3.01	0.65				1.28	0.6	2.30856	1.01349								1.25	0.93
	4.46	1.19				2.1	1.27											2.71	0.66				1.84	1.49	2.38303	1.07308								1.71	1.07
	1.88	0.78				2.73	1.1											2.41	0.99				1.38	1.06	2.22694	1.25407								1.27	0.73
	2.84	0.52				3.29	0.3											3.45	1.44				2.03	0.72	1.52044	0.964316								1.77	1.01
	4.38	1.32				3.56	1.55											3.39	0.62				2	1.16	2.347	0.978861								2.27	0.96
	2.33	1.18				2.89	0.83											2.78	0.64				2.13	2.42	2.1845	0.917191								1.97	0.61
	4.73	1.71				2.19	0.39											3.76	1.55				1.29	1.53	1.46297	1.04914								2.85	0.72
	3.63	0.74				2.95	1.03											3.1	0.88				1.98	1.26	1.82401	1.09167								2.69	1.21
	3.06	0.28				3.04	1.09											2.67	0.93				2.45	0.91	1.65461	1.29214								2.89	0.97
	4.91	0.96				3.24	1.84											3.81	1.05				1.51	1.27	1.5032	0.825121								1.66	0.93
	2.54	0.43				3.24	1.75											7.43	1.16				2.34	0.42	1.31888	0.753239								2.74	0.63
	3.16	0.68				4.76	0.69											3.6	0.93				1.8	1.74	1.09985	1.0924								1.57	0.79
	2.16	0.39				2.03	1.11											2.19	1.36				2.26	0.91	1.94075	0.698024								2.3	1.11
	1.9	0.56				3.59	0.85											2.61	1.18				1.73	1.49	2.16845	0.771126								1.13	0.84
	3.73	1.34				2.19	1.34											2.69	0.71				2.54	0.56	1.52984	0.865607								3.02	1.25
	2.25	1.24				2.28	0.59											3.76	1.09				2.43	0.29	2.02221	1.25842								2.25	0.85
	3.13	1.67				1.71	0.97											4.49	1.12				2.28	1.16	1.37539	0.602854								2.6	1.03
	1.87	1.47				1.45	0.67											4.28	1.56				2.29	1.03	1.50084	0.923823								2.12	1.05
	2.46	0.19				2.17	0.42											2.17	0.95				1.76	0.75	2.49749	1.1069								2.93	0.87
	2.71	0.4				2.76	1.34											2.82	0.95				2.21	1.11	2.60192	1.22466								1.42	1.48
	2.42	0.12				2.23	1.14											2.56	1.37				1.47	0.46	1.28295	0.579438								0.98	1.28
	2.41	0.47				3.22	0.91											2.76	0.68				1.63	0.74	2.08337	1.09011								1.32	0.99
	3.26	1.87				1.74	1.39											3.68	1.1				2.19	0.67	2.1033	1.24311								1.72	0.86
	3.09	0.68				1.67	1											2.35	0.99				1.46	0.83	2.3538	0.978431								3.3	1.04
	3.03	1.87				4.65	1.13											3.41	0.94				2.49	2.09	1.54273	1.51456								1.21	0.66
	2.84	0.25				2	0.99											2.41	1.16				1.54	1.71	1.95168	1.1415								2.82	0.88
	2.44	0.73				3.55	0.92											3.03	0.73				3.2	0.16	1.45287	1.53496								2.42	1.18
	2.96	0.78				3.22	0.98											2.35	0.92				1.9	0.94	1.72444	0.547659								2.08	0.65
	2.06	1.89				2.58	0.95											3.58	1				1.49	0.7	1.90835	1.27787								3.18	0.98
	2.96	0.28				2.59	0.76											2.05	0.72				2.46	1.28	2.04143	1.34794								1.87	0.83
	2.7	0.21				2.54	1.19											2.44	1.11				2.5	1.5	1.79224	0.754119								1.44	1.32
	3.09	0.8				1.92	0.77											2.1	1.26				2.17	1.84	2.80269	1.04465								2.8	0.48
	2.09	1.73				4.44	0.64											3.1	0.96				2.03	1.78	2.27609	0.678425								2.62	0.8
	2.51	0.66				2.85	1.78											4.1	1.46				1.02	1.48	2.43025	0.955535								2.52	0.94
	2.93	0.17				3.1	0.83											4.17	1.13				2.26	1.26	2.17075	0.859322								1.27	1.32
	3.03	1.07				2.62	1.53											3.17	0.74				2.54	1.01	2.27084	0.903053								2.78	0.94
	2.45	0.28				4.18	0.76											2.17	1.28				2.85	0.4	3.64896	1.04615								2.35	0.67
	2.83	0.25				3.15	0.86											1.72	1.4				1.31	0.19	2.10679	1.05653								1.65	0.54
	3.13	0.98				3.64	0.59											1.75	2				1.89	1.76	2.47263	1.15848								1.33	0.85
	6.22	0.93				2.34	0.88											3.61	1.06				2.57	1.44	2.34625	0.924427								3.79	1.13
	3.69	1.06				3.96	0.88											3.91	0.95				1.62	1.01	1.85565	0.558806								2.59	0.86
	3.83	1.27				2.37	0.77											2.45	0.84				1.51	0.97	2.34198	1.1852								2.55	0.99
	5.19	1.06				3.3	0.98											4.34	0.58				2.1	1.19	2.88939	0.956341								2.01	1.57
	5.32	0.54				3.84	1.17											2.16	1.46				1.86	0.7	1.94063	0.852696								1.83	0.9
	2.98	0.55				2.74	1.12											3.8	1.4				2.41	1.17	1.84465	0.997558								2.49	0.97
	2.9	0.83				3.65	1.39											1.95	1.09				2.49	1	1.18983	0.871346								1.88	0.97
	2.59	0.15				2.55	1.23											3.33	0.96				2.79	1.05	2.1702	1.24477								2.14	1.12
	4.42	1.29				3.73	0.97											3.26	0.74				2.72	1.77	2.23685	0.96089								1.66	1.42
	3.47	0.32				3.6	1.11											1.7	0.76				2.41	1.13	2.42507	0.967998								1.54	1.23
	4.12	1.5				2.77	1.71											3.36	1.55				1.55	0.55	1.81372	0.892092								2.23	0.67
	4.41	1.2				3.27	1.24											4.07	0.97				2.73	1.21	2.67102	1.08773								2.01	1.04
	3.43	0.11				3.38	1.93											3.2	1.39				2.36	1.61	2.17252	0.880672								1.35	0.65
	2.16	0.97				3.74	0.98											2.23	1.01				2.69	1.61	1.54303	1.2333								2.32	0.9
	2.58	0.86				2.74	1.12											4.68	1.03				2.6	2.09	1.59353	0.276427								2.33	1.53
	1.96	1.99				3.08	1.67											1.67	1.56				2.54	0.73	1.16824	1.11376								3.29	0.79
	4.52	1.24				2.58	1.19											3.82	1.56				2.53	1.01	1.99505	0.630529								1.82	0.76
	2.44	1.38				3.87	0.84											4.64	1.2				2.44	0.74	1.59786	1.56817								2.08	0.77
	2.39	1.45				4.77	1.01											2.58	1.85				2.48	1.26	1.35317	1.76844								1.16	1.29
	2.64	0.37				3.33	0.85											2.33	1.24				3.55	0.13	1.48598	1.12214								1.92	1.82
	3.87	1.91				3.77	0.69											2.96	1.65				2.69	0.65	2.2538	0.861007								2.09	1.48
	1.97	1.51				2.67	0.97											2.02	0.92				1.73	0.31	1.79466	0.886118								1.43	1.34
	2.09	1.25				3.83	1.27											1.83	1.2				1.55	0.97	1.52194	0.955637								2.32	1.05
	3.19	0.48				3.17	1.88											2.94	1.27				2.58	1.49	2.75135	0.840067								1.76	0.82
	3.05	0.48				3.1	1.26											3.21	0.75				4.3	0.38	2.96843	1.1583								1.76	1.29
	2.72	0.46				2.07	0.45											2.96	1.08				2.04	1.79	2.48661	0.971384								2.15	1.01
	4.2	1.86				3.71	0.96											2.05	0.83				1.78	0.77	2.24385	1.14327								2.79	1.11
	2.79	1.16				3.5	0.62											2.21	0.8				2.64	0.81	2.42837	0.795187								1.89	1.01
	2.12	1.77				2.81	0.81											3.01	0.89				1.92	1.58	1.66166	0.688987								2.37	1.32
	4.84	1.32				3.78	0.8											3.45	1.53				1.98	0.76	2.0917	1.19053								2.56	0.74
	4.03	1.01				2.9	0.66											2.76	0.76				3.39	1.26	1.68126	1.62309								2.59	0.65
	2.53	1.87				2.7	0.92											3.11	0.94				2.38	0.8	2.04546	0.892984								2.84	1.55
	1.98	1.43				4.4	0.98											3.28	1.66				2.67	1.41	1.52538	1.88062								2.24	1.36
	3.02	0.47				3.2	1.71											3.77	1.14				2.62	1.03	3.15015	1.04865								2.1	1.08
	2.28	1.31				2.7	0.65											3.17	0.72				1.82	0.68	1.86093	1.32576								1.89	1.04
	3.29	0.66				3.64	0.5											3.22	0.85				2.98	1.76	2.28613	0.815815								2.74	1.12
	2.49	1.26				2.3	1.57											2.97	1.02				2.59	1.96	1.85907	0.727155								2.29	0.9
	3.84	1.35				2.62	0.95											3.94	1.28				1.4	0.79	2.80359	1.60754								1.57	1.03
	3.86	0.85				1.81	1.01											3.63	1.4				1.39	0.96	2.49942	1.23363								2.68	1.16
	3.72	1.19				3.18	0.83											5.03	0.69				3.87	0.86	2.50077	1.14319								1.27	0.98
	5.89	0.71				4.69	1.01											3.1	0.77				2.31	0.17	1.3554	1.20901								2.73	1.16
	3.72	0.31				3.31	0.95											2.07	1.11				1.5	1.32	2.1131	1.47415								2.11	1.05
	3.02	0.28				4.15	0.89											4.13	1.08				2.16	0.65	2.25262	0.776355								1.51	0.56
	4.31	1.64				2.32	0.56											2.42	0.63				1.54	1.59	1.34353	1.08882								3.07	1.94
	3.1	0.19				4.09	0.86											2.11	0.82				1.92	2.1	2.30046	1.57167								1.3	0.73
	3.04	0.24				3.27	0.88											2.05	1.25				1.32	1.05	2.18607	0.802963								2.12	0.8
	1.78	2.28				3.42	0.95											2.72	0.55				1.05	1.52	2.43554	0.646285								2.04	0.59
	3.1	0.9				2.86	1.18											4.27	1.19				1.69	1.54	3.03812	1.06394								2.12	1.25
	1.87	1.08				3.38	1.4											3.77	1.22				2.48	0.5	2.33029	1.47302								3	0.75
	2.98	1.33				3.59	0.95											2.33	0.87				2.45	1.29	1.66746	1.57209								2.74	0.78
	2.32	2.01				2.07	0.89											3.53	0.82				1.22	0.34	1.46357	1.11838								1.81	0.9
	2.43	0.51				3.38	0.98											2.3	0.99				3.06	0.42	1.57406	1.2719								3.55	0.82
	1.85	0.44				4.42	0.74											2.68	0.62				1.93	1.59	1.92747	1.1675								2.04	1.02
	2.87	1.41				3.24	1.71											4.36	0.87				2.42	0.65	1.70799	1.4024								1.64	1.25
	2.13	0.94				3.33	1.86											1.92	1.2				1.21	0.21	2.44683	0.989696								2.78	0.87
	2.78	1.25				2.59	0.69											2.7	0.63				1.18	0.33	1.71602	1.14458								1.96	0.69
	3.12	1.13				2.04	1.28											2.81	0.85				1.92	1.86	1.34211	0.616825								2.39	0.82
	2.85	0.34				3.38	0.87											3.13	1.16				1.68	1.99	1.88961	0.952032								2.86	0.73
	2.01	1.54				2.3	1.28											3.21	1.37				2.4	0.53	1.80476	1.11586								2.03	1.47
	3.4	1.44				2.42	1.13											4.08	1.31				1.82	1.83	1.42064	0.973341								2.38	1.25
	2.71	0.47				1.99	1.52											2.12	1.2				1.13	0.57	2.8181	1.38744								2.27	0.89
	2.83	0.21				1.7	0.88											2.27	1.32				1.7	0.78	1.97807	1.06153								2.12	0.69
	3	0.47				1.79	1.45											2.07	0.87				1.59	1.38	1.8083	1.04244								1.73	1.98
	2.77	1.28				2.98	0.65											2.44	0.74				2.36	1.42	1.56389	0.946232								1.61	0.87
	3.84	1.2				1.43	0.62											2.85	0.98				2	1.08	1.64437	0.777531								2.2	1.27
	2.65	0.21				1.88	1.3											2.06	0.91				1.62	1.51	2.3469	1.11529								1.85	1.18
	2.73	0.28				2.43	0.39											2.35	0.81				1.32	1.25	1.94164	0.700912								2.22	0.87
	2.27	0.38				3.4	0.72											3.54	0.62				2.95	0.14	1.84954	1.03842								1.8	0.73
	2.56	0.23				1.93	1.06											3.16	1.11				1.53	1.65	1.40167	0.780314								1.81	1.32
	2.71	0.37				3.62	0.78											2.43	0.97				1.65	1.43	1.71216	1.09081								2.1	1.01
	3.22	0.54				2.99	0.96											2.31	1.48				1.75	1.07	1.28255	1.10053								1.9	0.92
	3.05	1.77				1.69	0.75											2.81	1.26				2.44	1.24	2.46543	1.24139								1.7	0.97
	3.08	0.73				2.76	0.92											2.34	0.78				2.54	0.83	1.55672	1.0884								3.42	1.04
	3.22	1.07				3.5	0.87											3.1	0.63				1.39	0.11	1.93838	0.844073								2.36	0.59
	4	1.26				2.28	1.38											2.76	0.6				2.56	0.73	1.35164	1.14177								2.16	0.8
	3.13	0.24				2.38	0.98											4.72	0.83				2.38	1.69	1.4573	0.699857								2.54	0.64
	2.44	0.76				1.71	0.92											4.87	1.05				1.34	0.18	2.1348	0.762077								2.45	1.08
	2.97	0.25				2.47	1.03											2.98	0.68				2.25	1.76	2.14097	0.663365								1.19	0.51
	2.43	0.68				2.8	1.15											2.16	1.13				1.48	0.44	1.79588	1.08957								1.45	1.81
	3.54	1.47				2.61	1.64											4.09	1.37				1.75	1.5	1.67636	1.15219								1.98	0.92
	3.37	1.31				1.98	0.95											2.52	1.26				1.59	0.22	1.79364	1.26963								2.33	1.2
	2.48	0.96				2.03	0.79											1.8	0.88				2.31	0.58	2.05387	1.12932								3.14	0.99
	3.38	0.64				2.96	0.8											3.43	0.62				1.49	0.13	1.8825	0.169711								1.8	1.62
	3.89	1.4				2.1	1.21											3.02	0.86				2.56	0.85	2.08107	0.9108								3.48	0.97
	4.26	0.35				3.15	0.5											3.67	0.88				2.75	0.65	1.61998	0.543258								3.05	1.28
	2.53	1.01				1.98	1											2.55	1.09				2.74	0.89	2.17455	0.624524								1.71	0.93
	2.39	1.23				3.09	1.06											4.91	1.4				1.71	0.87	2.39511	0.859328								2.41	0.93
	3.54	1.19				2.54	1.2											3.93	1.08				2.21	0.94	2.16028	0.834226								2.8	0.89
	2.11	1.52				1.96	1.15											3.6	1.34				2.42	1.08	1.49721	0.804132								2	0.88
	3.25	1.21				3.02	0.72											2.51	1.23				2.26	1.14	1.62926	0.651964								1.07	1.31
	4.42	1.35				2.69	2.18											2.49	1.19				1.55	1.1	2.08991	0.870115								1.95	0.93
	3.02	0.69				3.68	0.93											2.7	0.68				2.24	2.11	2.24044	0.9101								2.68	1.04
	2.63	0.46				3.22	1.39											3.06	0.68				1.3	0.3	1.99154	0.876441								1.82	1.13
	3.48	1.09				2.64	0.79											3.22	0.81				2.26	1.24	1.71158	1.30655								1.56	0.94
	4.5	1.27				3	1.51											3.02	0.94				2.29	0.55	2.20087	1.21875								1.29	0.67
	2.52	1.99				2.82	1.01											3.52	0.79				1.36	0.98	1.37613	0.780955								1.06	0.97
	3.64	0.62				3.3	0.77											2.87	1.21				1.65	0.95	4.55111	0.614226								3.23	1.41
	3.99	0.89				4.79	0.76											3.97	1.07				2.25	1.49	1.27735	1.05244								1.67	1.08
	2.84	1.15				2.57	0.96											2.47	0.71				1.37	0.05	2.73884	1.07669								1.93	1.2
	2.37	1.59				2.11	1.29											2.46	0.67				3.29	0.14	2.47977	1.06196								2.16	0.68
	2.47	1.13				3.33	1.19											2.71	0.62				3.42	0.64	1.02346	0.989887								1.94	1.38
	2.72	0.29				2.2	1.34											3.65	0.87				2.27	1.51	1.68667	0.96884								1.52	1.09
	3.56	0.48				5.08	0.8											4.13	1.56				2.16	1.17	1.57	1.16054								3	0.95
	2.51	0.85				2.57	1.32											2.39	0.57				3.07	0.9	1.76988	1.08922								2.94	1.84
	1.97	1.04				2.71	1.2											2.5	0.98				3.18	1.7	1.70088	0.732111								2.07	0.98
	3.1	0.21				2.55	1.06											3.19	0.83				1.45	0.28	2.2084	0.805142								2.13	0.71
	2.31	1.34				4.03	0.64											3.63	1.98				1.95	0.72	2.27007	0.804269								1.7	1.09
	2.65	0.44				4.48	1.08											2.6	0.71				3.07	0.64	1.89466	1.03383								1.61	1.04
	2.85	0.32				2.59	1.09											2.59	1.04				1.82	1.1	1.98592	0.582085								1.93	1.12
	3.63	0.28				3.05	0.93											2.09	0.73				3.3	1.29	2.67942	1.21905								2.41	1.24
	2.32	1.95				2.62	2.01											3	0.63				1.78	1.32	2.66102	0.838181								2.32	0.93
	4.11	1.03				3.58	0.71											1.99	1.07				2.11	1.83	2.65531	1.62274								2.36	1
	4.36	0.87				4.31	1.07											4.12	1.33				1.67	0.41	2.38949	1.24787								2.61	1.23
	3.33	0.28				5.41	1.06											2.46	1.4				2.74	0.86	1.45411	1.35631								2.35	0.87
	2.32	1.15				2.41	1.08											8.2	0.65				2.13	1.51	1.82664	0.896975								2.62	0.72
	3.6	0.97				4.21	0.62											3.08	0.86				2.44	0.62	3.13967	1.04679								1.4	1.27
	2.63	1.2				3.25	1.15											2.61	0.93				2.96	1.54	2.60455	0.879924								1.33	1.36
	2.62	1.63				2.69	1.3											4.16	1.28				3.18	1.15	1.38616	0.790794								2.82	1.04
	3.35	0.38				2.05	0.92											2.2	1.08				3.25	0.26	3.0734	1.10145								1.61	0.69
	4.34	1.57				3.46	1.14											2.64	0.79				2.37	1.46	2.11329	1.25876								1.17	1
	3.55	1.29				4.26	1.27											2.15	0.72				2.43	1.56	2.42046	0.839351								2.77	1.03
	3.09	0.46				2.56	0.74											3.32	1.44				2.02	1.85	2.15947	1.09147								2.75	1.57
	5.28	0.73				2.33	1.04											3.43	1.33				2.1	1.15	1.91378	0.74005								2.29	1.54
	2.48	0.47				2.99	1.56											2.2	1.01				2.32	1.41	1.70185	0.942199								1.05	0.84
	2.35	1.37				4.23	1.27											2.68	0.74				2.48	1.62	2.82969	1.0265								3.18	1.15
	3.2	1.32				3.82	0.55											3.17	1.18				4.05	1.43	2.29631	1.43855								1.22	0.92
	2.83	1.81				2.97	0.71											2.13	1.09				1.84	0.23	2.23465	0.50463								2.65	0.82
	3.02	0.7				4.54	0.61											1.93	1.39				1.88	1.83	1.39576	1.14236								1.77	0.56
	3.67	1.53				4.92	1.03											3.19	1.73				1.6	0.9	1.70113	0.746639								3.01	1.08
	2.29	0.25				4.42	0.69											3.62	0.98				2.6	2.01	2.51868	0.839819								2.07	1.11
	3.18	1.04				4.56	0.92											2.86	1.05				1.84	1.47	2.16446	0.896488								1.87	0.79
	2.71	2.07				3.49	0.73											2.21	1				1.84	0.89	1.99162	1.34027								2.4	0.83
	1.77	1.26				4.57	1.13											3.61	1.33				2.31	1.2	2.02507	0.700239								2.71	0.9
	2.96	0.6				2.69	1.17											2.52	0.75				2.62	0.83	1.82925	2.08952								1.72	0.94
	1.82	0.86				5.5	0.52											1.22	0.64				2.85	1.18	1.0808	2.38022								1.54	1.04
	2.74	0.27				2.13	0.55											1.69	1.17				1.94	1.24	2.15138	1.59098								2.01	0.93
	2.41	0.95				3.11	1.18											4	1.15				2.14	0.96	2.58372	1.4007								2.68	0.91
	1.86	1.45				2.77	1.17											4.11	1.39				1.76	0.37	2.41959	1.01311								3.35	0.87
	1.84	0.77				4.19	0.71											4.52	1.17				2.16	0.68	2.45466	1.95592								1.59	1.08
	3.02	1.73				3.41	0.84											2.87	1.16				2.34	0.81	1.80318	1.18918								1.92	1.24
	3.02	1.37				4.34	0.69											2.36	0.84				1.85	0.26	1.24049	0.718005								1.95	0.94
	2.62	1.58				3.26	1.02											2.98	0.84				1.99	0.21	1.58896	0.754479								2.56	0.98
	2.98	1.96				2.85	0.85											2.47	0.81				2.38	0.79	1.94369	1.2812								1.87	0.91
	1.41	1.98				2.83	1.25											2.3	1.04				1.28	0.5	2.29409	0.727366								1.52	1.12
	2.94	0.4				4.45	1.12											4.34	0.9				2.18	1.39	2.36336	1.11511								2.66	0.88
	2.17	0.59				5.93	0.67											4.26	1.19				3.53	0.28	1.95236	1.16636								2.1	0.89
	2.36	0.36				4.09	0.9											2.66	0.86				2.15	1.38	2.55606	1.15227								1.63	0.82
	2.97	1.72				2.28	0.54											7.48	1.2				2.42	1.5	1.90726	1.00364								2.12	0.97
	2.54	0.53				1.88	0.52											2.94	0.83				3.04	1.17	2.50306	1.1165								2.07	1.01
	2.9	0.22				2.13	1.2											3.22	0.74				3.01	0.91	2.07314	0.961075								2.59	1.06
	3.55	0.59				4.35	0.81											3.89	1.5				3.23	0.43	1.88707	1.44212								1.68	0.58
	2.54	0.44				2.75	0.72											1.73	1.2				2.14	0.55	1.76196	1.1984								1.55	1.07
	2.4	1.16				2.44	0.94											2.01	1.65				3.22	0.71	1.94698	0.611653								1.87	0.76
	2.97	1.24				4.43	1.15											2.84	0.73				3.52	0.29	1.36796	0.953135								2.15	0.93
	1.94	0.82				3.32	0.7											3.27	1.23				2.93	0.59	2.3191	1.12322								2	1.45
	2.64	0.24				1.94	1.14											2.73	0.55				2.29	1.05	4.90543	0.71474								2.58	1.06
	2.58	1.44				2.45	0.79											2.34	0.96				2.53	0.79	1.53201	1.18768								2.08	1.53
	4.16	1.52				2.29	1.69											2.36	0.9				3.04	0.26	1.48351	1.21533								1.3	1.16
	3.45	0.37				2.91	1.21											2.57	0.8				2.6	1.47	2.2219	0.79712								1.54	0.97
	2.99	0.32				2.86	1.15											3.45	0.86				1.27	1.34	1.78446	0.76904								1.81	0.83
	3.06	0.26				2.32	0.95											3.36	0.59				2.36	1.06	1.64056	1.38849								2.43	1.01
	4.03	1.55				1.5	0.42											4.73	1.44				1.7	1.06	2.67811	1.43573								2.23	0.78
	3.15	0.32				3.15	1.2											2.95	0.69				3.06	0.64	1.7101	0.934199								2.14	1
	2.87	0.36				2.7	0.98											4.66	1.27				1.94	0.93	1.35415	1.40027								1.36	1.06
	3.2	0.33				2.5	1.06											2.71	0.81				2.08	0.64	1.22578	0.873883								1.98	1.58
	2.46	1.86				2.47	0.65											4.34	1.07				2.41	1.59	2.01579	1.07637								1.87	1.01
	2.19	1.99				2.42	1.06											2.08	0.88				2	0.77	1.7453	0.963138								1.12	0.92
	4.28	1.21				1.83	1.16											2.46	1.07				1.5	0.5	1.90161	0.783948								3.02	0.78
	3.87	1.46				2.47	1.45											3.37	0.6				1.82	1.21	2.11364	0.898868								1.29	1.04
	3.16	0.22				3.03	0.9											2.59	0.98				1.61	0.95	2.39801	0.80251								2.98	1.28
	4.01	0.9				3.76	0.86											6.74	0.8				1.79	1.02	2.62865	0.983295								2.03	1.15
	2.9	0.29				3.35	0.79											3.18	0.59				1.23	0.4	2.6518	1.65941								1.09	0.83
	2.57	0.3				2.15	1.21											3.02	0.8				1.12	0.24	1.66949	1.14073								1.29	0.81
	3.47	0.87				2.9	0.83											3.64	0.7				2.12	0.54	2.37593	1.42331								2.96	0.81
	3.44	0.52				2.78	1.17											4.36	1.14				1.67	1.8	3.01959	0.725331								3.35	1.01
	3.25	0.3				3.01	1.35											2.36	1.28				2.14	1.21	2.1496	1.04495								2.18	0.78
	3.74	1.15				2.43	1.41											3.05	0.75				1.65	0.62	2.27873	0.998206								1.47	1.04
	3.03	0.63				2.57	1.33											2.44	0.56				1.94	0.89	2.35703	0.971374								1.2	1.04
	1.85	1.2				2.4	0.7											2.47	0.81				1.88	1.73	1.52888	0.673086								2.53	1.22
	3.09	0.61				3.16	1.3											3.11	0.56				2.21	1.43	1.53539	0.335682								3.73	1.33
	3.71	1.19				3.31	0.92											2.14	0.7				1.75	1.52	1.92342	1.06844								2.03	1.23
	3.75	2.67				2.34	1.3											3.72	1.25				1.6	0.77	1.34524	0.576426								2.99	0.88
	2.6	1.47				4.33	0.89											3.49	1.12				2.92	0.97	2.73477	1.0384								2.38	0.56
	2.24	1.1				3.34	0.67											3.36	0.63				2.03	0.27	1.47372	1.47268								2.74	0.86
	2.12	1.36				2.12	0.71											2.86	0.7				2.08	1.37	2.13875	1.02941								1.77	1.35
	2.04	2.43				1.94	0.63											1.75	0.81				2.34	1.45	2.12212	0.795719								2.6	0.97
	4.83	0.84				2.71	0.95											2.25	1				2.23	1.02	1.68401	1.75308								1.66	1.13
	2.93	0.37				2.85	1.16											2.68	0.96				1.91	1.5	2.27116	0.999325								1.67	1.05
	3.14	0.2				3.49	1.36											2.07	1.18				1.74	2.04	2.36431	1.22382								2.99	0.67
	2.72	1.51				3.41	0.61											2.08	0.85				2.01	1.45	2.06993	0.654262								1.54	1.7
	3.44	1.37				2.3	0.89											3.19	0.66				2.49	0.84	1.78139	0.536213								2.72	1.01
	5.91	1				1.79	1.13											3.72	1.14				1.28	0.27	2.67333	1.24603								2.07	0.8
	3.68	2.27				2.75	1.04											3.15	0.62				1.93	1.39	1.88342	0.832161								1.58	0.9
	3.38	0.76				2.69	1.41											2.73	0.8				1.67	0.55	2.35744	0.918089								2.57	0.75
	3.19	0.21				1.84	1.24											3.31	1.26				2.72	0.8	2.03035	1.89475								1.67	0.71
	3.72	0.46				2.38	0.75											2.16	1.05				1.95	0.43	2.0711	1.10136								1.25	1.12
	3.12	0.4				2.62	0.63											4.43	1.22				1.3	0.46	1.70907	0.647544								2.17	1.01
	3.81	0.45				2.38	1.11											2.27	0.84				1.62	1.13	1.79754	0.962222								1.99	0.84
	1.96	1.91				2.26	1.57											3.15	0.66				2.45	1.45	1.80044	0.815345								1.85	0.78
	2.67	0.79				2.37	0.78											2.86	1.04				2.21	1.76	2.30133	0.771804								2.21	0.7
	2.48	0.42				3.94	0.78											3.76	1.08				3.42	2.1	2.22201	1.08693								2.08	0.66
	2.26	1.41				3.48	1.08											4.08	1.41				2.49	1.22	1.7733	1.32763								2.19	1.37
	2.03	1.51				2.16	0.71											3.77	1.04				1.65	1	2.53491	1.11705								2.14	0.85
	3.25	0.44				3.85	0.91											2.34	0.61				1.82	1.19	1.67414	1.1162								2.76	0.7
	3.16	0.24				1.83	0.65											2.64	0.72				2.59	1.36	1.47873	0.950363								1.27	1.12
	2.6	0.26				3.54	1.4											2.72	1.08				1.27	0.41	2.41643	0.828024								1.58	1.03
	1.82	1.85				2.42	1.54											3.68	1.55				2	1.75	1.4765	0.741816								1.63	0.85
	3.06	0.12				2.41	1.28											1.74	1.33				2.49	1.28	2.47372	1.26561								1.8	0.82
	3.69	0.82				2.61	1.84											2.11	1.02				2.33	0.98	2.04854	0.66037								1.4	0.99
	2.38	0.82				2.52	1.06											2.33	1.31				1.58	0.2	1.8295	0.406368								1.77	0.99
	2.3	1.33				3.46	1.18											2.98	0.79				2.56	1.08	2.22444	1.13351								2.23	1.05
	2.37	0.59				1.86	0.89											2.48	1.41				2.39	1.15	2.07303	0.954506								2.31	0.82
	4.02	1.7				2.41	0.97											2.37	0.67				2.96	0.26	2.18194	1.05184								1.79	1.2
	4.96	1.53				4.32	0.81											4.02	1.24				3.01	1.17	2.30353	0.703201								2.23	1.21
	2.79	0.2				2.13	1.18											2.79	0.8				2.17	1.22	1.54472	1.20382								2.44	1.54
	2.4	1.09				2.66	0.72											2.13	1.44				2.98	0.53	2.52145	0.915678								1.53	0.86
	2.19	0.9				5.64	0.86											3.11	0.69				1.73	0.44	1.72983	0.818568								1.65	1.16
	2.66	0.86				6.51	0.67											1.69	1.4				2.26	0.8	2.32983	0.732264								1.5	1.14
	3.19	1.17				3.13	1.51											4.79	0.67				1.69	0.42	1.41915	1.4385								1.95	1.02
	1.57	0.62				3.49	1.3											2.36	0.86				2.14	0.65	1.66246	0.928429								2.1	0.81
	4.08	1.02				6.7	0.73											2.55	0.72				1.55	0.66	1.90572	0.81201								2.21	0.86
	2.01	0.19				2.51	0.82											4.13	1.43				1.55	0.61	2.01706	0.860725								1.73	1.26
	2.67	1.35				2.07	1.06											3.4	1.55				2.92	0.79	1.50016	1.3398								2.38	0.96
	1.9	1.7				2.66	1.71											3.21	0.94				2.7	0.97	1.63424	0.87923								2.9	0.79
	2.99	1.75				2.18	0.58											4.75	1.52				1.84	1.37	1.96063	0.611657								2.39	0.85
	3.87	1.33				3.29	1.08											3.21	0.98				2.18	0.87	2.09213	0.768165								2.49	0.99
	1.66	1.12				4.79	0.96											6.32	1.16				2.71	1.55	1.76944	0.902965								1.82	0.93
	3.74	1.14				2.77	0.81											2.65	1.03				2.62	2.36	2.43255	1.52668								2.02	0.8
	1.95	1.81				3.16	1.31											2.4	0.65				1.83	1.2	2.18807	1.03218								2.18	1.1
	2.4	0.47				3.66	0.84											2.5	0.69				2.17	1.15	1.69156	1.08167								2.69	0.93
	3.68	1.65				2.7	0.82											2.69	0.51				2.66	0.21	1.38156	1.10373								1.68	1.07
	1.45	0.32				4.73	0.74											3.16	0.74				4.54	1.36	1.55573	0.909137								3.27	0.84
	3.44	0.64				2.39	1.13											5.19	1.32				1.8	1.3	2.7743	0.965255								2.07	0.82
	2.29	0.9				2.73	1.3											3.03	0.67				3.1	1.51	1.59861	1.40625								2.29	1.02
	3.1	1.38				3.93	0.82											3.27	1.09				1.98	0.98	2.1053	0.893508								2.8	1.02
	2.22	0.8				3.36	0.88											4.8	1.41				2.71	1.15	1.24755	1.14695								2.23	0.91
	1.91	1.35				2.74	1.34											2.29	0.96				2.41	0.74	1.57433	0.856045								2.62	0.96
	2.57	0.68				2.51	1											2.55	0.93				2.97	0.66	1.42105	1.09687								1.62	1.5
	2.71	0.26				5.15	1.54											3.65	0.9				2.02	1.1	1.42012	0.69801								2.74	1.07
	2.95	1.36				2.74	1.11											3.25	0.7				2.56	1.95	2.09765	1.03848								3.39	1.47
	1.82	1.62				2.4	0.37											3.45	1.11				2.76	0.9	1.61724	1.05898								1.67	0.39
	3.21	0.63				3.97	0.91											2.56	1.11				3.15	0.39	1.67394	0.819442								2.52	1.41
	3.73	1.45				2.82	1.59											3.72	0.89				1.83	1.14	2.80004	1.25991								1.69	0.85
	1.63	1.47				4.11	0.73											3.66	0.74				1.75	1.11	1.44236	0.976544								2.05	0.82
	4.17	1.69				5.43	0.73											2.22	0.91				2.81	1.09	2.3206	0.873535								2.21	1.08
	1.88	2.05				2.88	0.54											3.91	0.96				3.22	0.79	1.59291	1.42975								2.85	0.6
	2.97	0.38				2.66	1.1											2.93	1.07				2.28	1.91	2.05945	1.27103								2.64	1.03
	3.97	1.15				4.21	0.91											1.92	0.96				1.2	1.44	1.56703	1.02821								2.02	0.93
	2.3	0.45				2.81	1.33											2.6	0.55				3.56	0.24	2.22801	1.12498								1.89	1.1
	2.88	0.41				5	1.05											3.42	0.99				1.64	0.45	1.6945	0.485169								2.34	0.86
	3.35	1.01				3.29	1.4											4.32	1.24				1.91	1.38	2.63811	1.2154								1.47	0.91
	2.36	0.31				2.86	1.26											3.09	0.78				3.94	0.18	2.12122	0.914103								1.37	0.66
	3.15	0.37				2.02	1.22											2.56	1.08				2.25	1.03	3.19355	1.04546								2.25	0.75
	2.97	0.2				2.41	1.09											2.61	0.69				3.09	1.94	1.03557	0.986326								2.01	1.28
	2.63	1.14				2.75	1											4.55	1.31				2.59	1.38	1.74299	1.51176								1.65	1.04
	4.82	1.32				1.75	0.84											2.3	1.12				3.6	0.06	2.04758	0.594845								3.12	0.84
	4.15	1.2				2.59	1.51											3.64	1.57				2.9	1.12	3.36142	0.894642								2.97	0.87
	4.24	1.17				2.42	1.6											2.11	0.99				1.99	0.97	2.30192	1.33615								1.87	1.2
	2.88	1.27				2.65	0.93											3.12	0.6				1.89	1.57	2.31371	0.984053								2.33	0.62
	3.71	1.26				1.83	1.07											4.31	1.67				1.14	0.11	1.75669	1.01697								1.86	0.85
	3.66	1.07				2.38	1.39											5.31	1.07				2.69	0.42	2.1382	2.18341								3.09	0.88
	4.49	0.95				3.59	0.55											2.2	1.4				1.37	1.07	2.16287	1.14973								2.54	0.77
	2.25	1.07				3.14	1.04											2.48	0.85				1.48	1.49	1.08474	0.458502								1.99	0.94
	2.95	0.71				2.26	0.88											3.11	0.5				1.64	1.35	2.29334	0.830575								2.76	0.63
	2.57	0.57				3.61	0.87											2.87	0.88				2.13	0.32	1.72347	1.7965								2.91	0.7
	3.42	1				2.22	0.63											3.5	0.98				1.89	0.35	1.94514	1.16624								1.18	1.47
	2.61	1				1.97	0.96											3.01	0.77				1.62	1.29	3.47285	0.996193								3.02	0.91
	2.96	0.36				2.54	0.81											2.85	1.14				1.52	1.32	2.56858	1.26306								2.37	0.92
	2.36	0.15				2.73	1.27											1.94	1.12				1.89	1.03	1.5118	1.56491								2.28	1.14
	2.51	0.61				2.51	0.79											2.72	0.8				1.72	1.2	2.8502	1.09777								1.65	0.82
	4.13	1.28				1.62	1.14											3.23	1.12				2.31	0.99	1.58007	1.2728								2.88	1.34
	3.26	0.9				2.75	0.86											3.82	1.19				2.05	0.56	1.85397	0.888894								2.52	0.85
	2.93	0.35				1.91	0.68											3.89	1.19				1.4	0.38	2.031	0.639115								2.47	1.22
	3.22	0.4				2.26	1.03											2.96	0.7				1.67	1.06	2.65147	2.08307								1.77	1.01
	3.7	0.84				1.84	0.84											2.55	0.59				2.17	0.99	2.47289	1.15789								2.48	0.83
	3.25	0.86				1.64	1.12											1.93	0.86				1.56	1.18	2.28021	1.23684								1.79	1.25
	3.21	0.45				2.47	1.3											1.99	0.75				1.35	1.1	1.6223	0.879778								2.78	0.92
	3.79	0.28				1.74	0.62											2.81	0.83				2.12	0.97	1.79121	0.79411								1.03	0.92
	2.7	0.24				3.48	1.6											3.55	1.03				1.59	0.99	1.63751	1.52303								3.09	1.09
	1.92	1.11				3.03	0.82											2.46	0.8				1.63	1.32	1.9904	1.40586								1.16	0.78
	3.78	1.65				3.59	1.09											2.61	0.82				1.43	0.96	1.97292	1.18001								2.63	0.97
	2.84	0.3				4.11	0.88											1.99	1.03				2.81	1.19	2.02313	1.29919								1.73	1
	3.04	1.12				2.96	1.53											3	1.14				2.2	1.18	1.43892	1.06389								1.66	0.9
	3.9	1.3				3.51	1.03											1.85	1.14				2.13	1.52	2.14732	1.17765								1.06	0.71
	4.64	1.64				2.44	1.27											3.34	1.53				1.3	0.53	2.61449	0.976748								1.71	0.91
	3.77	1.07				3.41	0.98											3.26	0.76				1.11	2.2	1.81099	0.971053								2.89	1.18
	2.59	1.54				3.04	0.94											1.95	1.68				1.85	1.39	1.61712	1.07074								1.81	1.18
	2.61	0.35				2.51	0.86											2.56	0.78				2.85	0.92	1.47546	1.4484								1.66	1.83
	2.89	0.47				5.25	1											2.31	1.46				1.93	1.1	1.68279	0.854458								2.78	0.76
	3.13	0.7				1.46	0.85											2.3	1.15				1.8	0.85	2.30106	1.1015								1.93	0.71
	2.21	0.59				1.74	0.5											2.54	1.27				6.56	0.93	1.63282	1.58166								1.67	1.23
	3.19	0.31				2.8	0.92											2.67	0.64				1.87	2.17	2.80468	1.09025								1.62	0.88
	2.93	0.22				2.19	0.87											3.86	1.42				1.68	0.61	1.30213	1.10099								1.46	1.02
	3.28	0.61				2.23	0.6											3.02	0.62				3.11	1.05	2.97568	0.691788								2.12	1.11
	2.17	1.38				2.53	1.19											3.85	0.84				2.44	1.23	1.59686	1.15394								1.88	1.55
	2.58	1.3				3.37	0.83											4.07	0.88				2.25	0.38	1.55085	0.867632								1.1	1.3
	4.01	2.16				2.35	0.75											2.67	0.71				2.5	1.1	1.94147	1.07348								1.11	1.1
	3.75	1.45				2.63	0.97											4.04	0.68				2.4	1.88	1.85382	0.739514								2.29	1
	3.32	0.24				4.15	0.72											2.9	0.67				2.24	1.36	1.20254	1.3264								2.18	1.03
	4.06	1.46				1.93	0.8											2.99	0.74				1.61	1.06	2.89364	0.857224								2.05	1.05
	3.05	0.9				2.31	0.71											3.53	1.54				1.37	1.13	2.87439	0.756136								2.37	0.57
	2.18	1.37				2.76	0.6											2.58	0.64				1.33	0.85	1.59522	1.39876								2.65	1.04
	1.86	0.76				2.41	1.01											4.77	1.34				1.89	0.36	2.3184	1.09364								1.9	1.11
	2.46	0.74				3.01	0.9											4.32	1.05				2.25	1.66	1.59362	1.14753								1.36	0.72
	2.43	1.18				3.26	1.06											2.08	1.05				1.63	0.91	1.65725	1.05577								2.34	1.05
	3.69	1.21				3.98	0.94											4.13	1.31				1.65	0.75	2.78268	1.05231								2.03	0.99
	1.8	0.63				3.25	1.19											3.13	0.75				2.77	1.03	1.39767	0.693007								1.85	1.16
	3.13	0.94				2.72	0.81											3.92	0.91				2.56	1.09	2.31112	0.867329								1.36	1.05
	1.66	1.38				2.88	1.12											3.36	0.94				1.22	0.85	1.31706	0.915888								1.12	1.44
	3.7	0.8				2.43	1.74											2.83	0.6				1.63	1.01	1.8129	0.648308								1.96	1.1
	2.21	0.31				2.44	1.22											4.81	1.34				2.91	0.08	1.98528	1.1491								2.74	1.18
	3.07	1.48				2.78	1.09											2.42	0.87				2.41	0.79	1.75191	0.805065								2.23	1.25
	2.23	0.89				2.79	0.64											2.79	0.59				1.68	0.49	1.61144	1.41579								1.25	0.8
	3.3	1.6				2.44	0.63											2.96	0.65				2.76	0.5	1.37979	0.716371								1.36	0.81
	2.82	0.73				3.15	1.06											3.38	0.54				2.99	0.82	2.67788	1.23891								2.65	0.8
	2.19	0.75				6.38	0.76											2.79	0.95				2.75	0.99	2.15536	0.893129								2.7	0.69
	2.53	0.92				3.56	1.12											3.05	0.68				1.49	0.31	1.39826	0.775018								2.67	1.1
	3.04	0.48				4.12	0.54											2.92	0.66				2.64	2.1	2.72079	0.608686								1.32	1.26
	2.24	0.19				2.71	0.41											2.82	0.69				2.71	1.18	1.66456	1.79121								2.29	1.07
	3.84	1.02				2.17	0.68											2.56	0.75				2.62	0.84	1.45821	0.940328								2.71	0.89
	2.54	0.19				2.08	0.84											2.54	0.96				2.28	0.35	1.40954	0.921354								1.51	1.78
	5.44	1.56				3.21	0.82											3.58	1.08				2.32	0.98	1.47539	0.734742								1.18	0.83
	2.21	1.16				2.61	0.81											2.1	0.93				2.19	1.42	2.29071	0.812235								2.93	1.62
	2.63	0.39				2.27	0.68											3.59	1.11				2.48	1.34	2.28027	0.804228								2.71	1.26
	3.62	1.22				1.85	0.98											4.64	1.21				1.56	2.1	2.37275	1.01336								1.73	1.13
	2.23	0.79				3.63	1.04											2.17	0.81				2.55	0.76	2.05395	0.787368								2.68	0.66
	3.57	1.5				2.76	1.11											2.52	0.84				2.72	0.74	1.49602	1.34373								2.21	1.02
	3.2	1.38				3.93	0.93											4.08	1.1				3.53	0.59	2.25278	0.921482								3.01	1.04
	2.02	0.95				2.92	0.66											3.05	1.53				2.53	2.03	2.06569	1.25857								2	1.78
	2.15	0.4				4.64	0.91											3.72	0.99				5.11	1.05	2.37197	1.2637								3.1	1.12
	2.18	0.47				4.32	1.43											4.08	0.93				3.1	1.12	3.36416	0.967098								1.95	0.78
	3.25	2.31				3.15	0.82											4.36	1.42				3.04	0.81	2.01223	0.513006								3.79	0.78
	2.67	0.3				3.96	0.96											3.83	1.31				2.12	1.13	2.47988	0.67053								1.02	0.89
	2.24	0.16				4.94	0.83											2.35	1.32				1.23	0.92	2.5002	0.937128								1.29	0.86
	3.58	1.76				6.72	0.84											2.98	0.71				1.91	1.68	3.0036	0.873121								2.93	0.92
	2.73	0.07				3.41	1.96											3.32	1.26				2.44	0.41	2.45462	0.778728								1.57	1.31
	1.74	2.01				2.43	0.96											3.65	1.25				2.91	0.99	1.91612	1.80531								2.83	0.78
	4.24	2.14				3.23	1.03											2.47	0.68				1.78	0.92	2.10702	0.625823								2.08	1.03
	4.33	1.37				2.44	0.86											2.81	0.76				2.4	0.02	2.68072	0.8968								2.73	0.76
	3.43	1.34				3.98	0.49											3.28	0.89				1.48	1.57	1.93653	1.05243								2.52	0.78
	3.31	0.92				2.66	0.72											2.99	0.57				2.08	1.32	1.70562	1.16548								2.29	1
	2.14	0.3				2.95	1.56											2.21	0.91				1.84	1.96	2.58914	1.05372								2.14	1.04
	3.5	2.09				2.97	0.69											3.7	1.92				2.1	1.05	2.30988	0.996909								3.06	0.88
	4.27	2.08				2.71	0.77											4.11	0.5				1.25	1.01	2.044	0.946652								1.57	1.45
	1.99	0.48				2.02	1.24											3.85	1.28				2.65	0.38	1.52531	1.93471								2.77	1
	2.24	1.04				1.84	0.5											2.31	0.92				2.32	1.13	2.07504	1.43073								2.61	0.77
	3.71	1.14				1.73	0.94											3.06	1.44				1.82	1.33	2.27546	0.691311								2.57	1.35
	1.85	1.46				1.85	1.02											2.9	0.76				2.38	0.11	1.41539	0.875602								4.3	0.89
	4.07	1.88				2.84	0.72											2.88	0.68				2.23	1.25	1.58087	1.31121								2.14	1.24
	2.24	0.75				2.69	0.72											3.36	1.03				2.01	1.58	2.8675	0.868471								1.8	0.93
	2.34	1.25				2.29	1.41											3.27	0.94				1.46	0.47	1.91412	0.948378								3.03	1.29
	3.05	1.07				3.31	0.87											2.1	1.31				1.2	0.36	1.96616	1.32743								2.63	0.73
	3.16	1.27				2.56	1.41											1.89	1.23				2.3	1.84	2.47741	1.06896								2.78	0.84
	3.7	2.23				2.62	1.09											2.92	0.67				2.72	2.11	1.90714	0.913424								1.73	1.09
	5.5	0.19				2.55	1.23											1.91	0.75				1.38	0.23	1.53183	0.935814								3.11	0.65
	3.48	1.34				2.74	0.76											1.5	1.25				1.88	1.82	1.29569	0.577849								2.2	0.93
	2.1	2.08				2.23	1.11											1.85	1.22				1.52	2.23	2.25371	0.965313								1.57	0.52
	3.28	0.17				2	1.01											3.03	1.02				1.74	0.98	2.22177	1.07353								2.66	0.97
	4.04	1.71				2.55	1.15											2.22	1.07				2.26	1.04	2.06152	0.857017								1.29	1.61
	4.15	1.74				2.59	1.75											3.92	1.14				2.72	1.09	1.93427	0.925309								1.95	0.89
	3.84	1.6				1.58	1.61											3.32	1.3				1.72	1.02	1.39999	0.796534								2.18	1.04
	2.84	1.03				1.46	0.69											2.38	0.83				2.8	0.62	1.84914	0.919717								2.19	1.05
	3.19	2.12				2.49	1.05											3.39	1.11				3.06	0.26	2.21508	0.886629								3.06	0.93
	1.9	1.92				3.04	0.54											2.65	0.66				1.79	1.28	2.61893	0.939836								1.89	1.17
	2.99	0.95				2.34	0.79											3.3	0.82				2.94	1.16	2.67318	0.838135								2.43	0.92
	2.15	2.66				3.17	0.84											1.93	1.18				1.52	0.58	3.11046	0.843488								2.41	1.17
	3.17	0.22				2.48	1.43											2.6	0.98				1.95	1.31	2.31621	0.724803								2.45	0.85
	2.85	0.45				2.76	1.59											2.5	0.65				1.59	1.03	1.63305	0.729005								2.09	2.26
	2.76	0.3				2.4	0.91											2.71	0.8				1.69	0.19	1.8567	0.671222								1.29	0.86
	3.12	0.55				3.26	0.8											2.92	0.96				2.69	1.91	2.08099	0.960223								2.19	0.92
	2.9	0.39				3.67	1.37											4.02	1.46				1.58	0.68	1.64083	0.88037								1.95	1.33
	3.67	3.41				3.63	1.33											2.68	0.93				1.49	0.2	1.72922	1.00028								2.12	0.92
	4.04	1.22				3.93	0.64											3	0.84				1.78	1.34	1.7165	1.45331								2.26	0.79
	2.21	1.06				1.65	1.92											2.53	0.79				1.14	0.95	1.35996	0.911203								2.77	0.92
	7.9	0.8				2.23	1.29											3.09	0.7				2.19	0.92	2.79618	0.847122								1.64	0.93
	2.36	0.71				2.8	1.05											3.92	1.07				2.51	1.6	1.88768	0.745957								2.59	0.87
	4.16	0.92				2.38	0.74											4.15	1.07				1.66	0.88	2.4512	0.843719								1.55	0.71
	2.93	0.7				2.39	1.44											2.03	1.37				2.65	0.96	4.03444	0.911461								1.8	1.11
	3.99	1.58				3.25	1.13											2.47	1.16				2.34	1.02	2.58647	0.778581								1.95	0.97
	4.14	1.01				4.06	0.87											3.18	0.93				3.17	0.16	4.77732	0.966424								2	1.11
	3.52	1.12				2.98	1.03											2.46	0.65				2.7	1.11	2.93632	1.22383								2	1.16
	2.91	0.82				3.72	0.97											2.05	1				1.8	0.31	1.27901	0.844046								2.16	0.92
	2.53	0.73				2.32	0.8											2.01	0.83				3.14	0.26	1.82482	1.87543								1.49	0.91
	2.73	0.21				4	1.01											3.28	1.01				2.4	2.02	1.87014	1.04595								1.13	2.92
	2.49	0.7				2.27	0.74											2.8	0.85				1.99	1.42	1.23603	1.04498								1.92	2.02
	2.79	0.35				2.43	1.13											2.22	0.63				1.43	0.57	1.69622	0.906156								1.2	0.78
	2.96	0.75				2.49	0.92											1.74	0.91				1.91	0.76	2.362	0.81113								1.55	1.09
	1.73	0.16				2.08	0.62											2.84	0.76				3.17	1.75	2.75196	1.27482								1.72	1.1
	2.07	0.68				2.93	1.41											2.67	0.58				2.7	0.95	2.44884	0.606145								2.2	0.98
	2.66	1.45				2.58	1.04											2.32	1				2.44	1.5	1.71292	0.71127								2.88	1.23
	2.28	0.72				2.63	2.04											1.78	1.48				3.64	0.3	2.49741	1.44053								2.11	0.76
	2.63	0.81				2.29	1.03											2.81	0.71				3.76	0.7	1.5952	0.62186								2.2	1.84
	2.98	1.29				3.11	0.84											1.97	1.14				2.11	1.63	1.78461	0.67139								1.67	1.01
	2.31	0.39				1.92	0.72											2.87	0.56				1.6	0.57	2.07015	1.01984								1.13	0.86
	3.98	0.68				4.1	0.85											3.81	0.72				2.97	0.99	1.47654	0.747452								1.85	1.38
	3.19	0.87				2.2	1.01											3.36	0.85				1.77	1.15	1.75862	0.890156								2.03	1.16
	2.98	1.57				3.39	0.79											2.57	1.03				3.36	0.1	2.36386	0.847207								2.82	1.11
	2.83	1.09				2.72	0.62											3.64	1.38				1.63	0.25	1.68224	1.01315								2.42	0.59
	2.2	0.41				4.36	0.85											3.27	0.63				1.63	0.51	3.0586	0.841698								1.79	0.7
	1.97	1.22				1.9	0.77											3.31	1.12				3.18	0.28	1.44166	1.02449								2.53	1.37
	2.15	1.38				2.72	1.4											2.3	1.04				3.01	1.76	2.74535	1.24097								2.73	0.89
	3.96	1.34				2.87	1.67											2.13	1.08				1.91	1.78	1.51357	1.86387								1.53	1.42
	2.07	1.01				1.68	1.14											2.87	0.93				2.19	0.52	2.32069	1.12954								2.44	1.02
	2.43	0.09				3.02	0.38											2.63	0.98				3.16	0.25	2.07717	0.569405								1.07	1.06
	2.82	0.98				2.8	1.3											3.32	0.98				2.41	0.91	1.92548	0.618191								1.58	0.98
	2.57	0.19				4.27	0.83											3.26	0.59				1.97	1.78	1.78184	0.933494								1.84	0.93
	2.85	1.75				2.86	1.42											2.27	1.57				1.71	0.16	2.04153	1.12452								2.87	0.88
	2.53	0.88				3.08	0.79											3.44	1.77				2.66	0.96	2.73744	1.39262								2.33	0.98
	1.97	0.81				4	0.71											2.06	1.04				3.54	0.15	2.13825	1.0013								3.54	1.03
	3.4	1.63				3.22	1.37											2.59	0.82				2.25	1.22	2.80866	1.46749								1.63	1.71
	1.77	0.85				3.62	1.19											2.81	0.68				1.38	0.61	2.21388	0.796479								1.36	0.84
	2.15	0.88				2.69	0.82											4.48	1.19				3.03	1.6	1.73701	1.10193								2.69	1.38
	2.56	0.42				3.04	1.1											1.9	1.24				2.22	1.78	1.46595	1.49386								1.96	0.71
	2.56	1.13				2.99	0.67											3.39	0.71				2	0.47	1.89364	1.24437								1.97	1.05
	2.16	1.58				4.31	0.57											2.26	1.13				1.06	0.76	1.88161	0.412878								2.07	1.17
	2.23	0.36				2.76	1.07											3.92	1.18				2.49	1.42	2.23172	1.20388								1.32	1.39
	2.17	0.82				2.92	1.61											3.43	0.61				2.04	1.14	2.33727	0.855855								4.64	0.47
	2.52	0.31				3.18	1.16											3.13	0.68				3.26	0.94	1.79906	1.02606								1.78	0.78
	3.68	1.58				3.15	1.16											4.11	1.51				1.85	1.33	1.76655	1.21591								2.92	0.93
	2.45	0.51				2.66	1.2											2.74	0.64				2.74	1.34	3.27617	0.528187								2.37	0.72
	3.02	2.02				2.87	1.67											4.37	0.71				2.53	0.87	1.86266	0.988403								2.15	0.8
	2.97	0.16				3.65	1.33											2.53	0.77				1.68	0.35	1.66357	1.10486								2.19	0.81
	2.45	1.13				3.35	0.78											2.32	0.57				2.3	0.68	2.06895	1.03157								1.68	0.83
	3.37	1.59				3.74	0.67											2.24	0.63				1.83	0.76	1.50396	1.85691								2.93	0.79
	4.07	1.62				3.16	0.68											3.17	0.8				3.59	0.58	2.4069	1.22811								1.49	1.03
	2.79	0.89				2.71	1.35											2.59	0.86				1.96	0.43	1.63539	0.697769								1.61	0.91
	2.39	0.21				2.86	2.01											2.93	1.98				1.43	0.93	2.27444	1.24565								1.6	2.59
	2.7	0.57				1.77	0.49											2.19	0.91				1.78	0.96	1.96704	0.655256								2.85	0.98
	2.76	1.65				1.88	0.54											2.06	0.91				2.71	1.22	1.53498	0.935106								2.1	0.82
	3.94	1.17				3.11	1.49											3.42	1.08				2.58	1.9	2.29475	0.924639								3.13	1.17
	3.97	0.95				2.07	1.22											2.33	0.66				2.73	1.14	1.92422	1.02915								1.93	1.07
	3.13	1.79				2.9	1.36											3.21	0.83				1.53	1.76	2.82532	1.3832								2.09	1.27
	2.4	0.92				2.66	1.04											1.84	0.96				1.4	0.92	2.69228	0.849553								2.09	0.68
	2.89	0.92				2.75	0.59											3.21	0.73				1.38	0.38	2.83243	1.4442								4.11	0.92
	2.7	0.56				3.09	0.76											1.82	2.01				2.02	0.9	1.56128	0.773142								1.5	0.58
	2.95	0.29				7.51	1.37											1.83	1.26				1.19	1.59	2.07169	0.820423								1.41	0.97
	1.93	1.03				4.81	0.57											2.5	0.78				1.66	1.41	2.30129	0.714269								2.29	1.11
	3.21	0.92				3.36	1.91											2.42	0.76				1.33	0.25	1.43084	1.31898								2.05	0.81
	2.36	1.63				8.35	1.35											2.86	0.78				1.39	0.8	2.04743	0.861007								2.77	0.92
	2.97	0.25				5.61	1.41											2.47	0.64				1.53	0.93	1.903	0.765782								1.21	1.11
	3.29	0.33				2.35	0.83											1.98	1.37				1.03	1.35	1.34889	1.04303								1.9	0.92
	2.76	0.47				2.17	0.89											2.13	0.76				1.64	0.59	1.62947	0.616552								2.73	1.34
	2.38	1.2				3.15	0.78											2.67	0.6				2.05	2.26	1.82513	1.2451								2.91	0.76
	3.05	0.39				3.34	1.05											3.59	1.11				1.49	1.56	1.47302	0.996491								1.36	0.69
	4.25	1.18				3.55	0.58											3.25	1.57				2.21	1.58	1.69379	1.43936								2.64	0.82
	2.35	0.72				3.18	0.72											2.84	0.98				1.29	0.18	1.83746	0.654989								3.43	0.69
	2.34	1.91				2.96	1.12											3.69	1.28				2.56	0.6	2.37001	0.780473								2.84	1.25
	3.28	0.98				1.7	1.29											2.9	1.45				2.23	0.87	2.7285	0.870041								1.73	1.25
	3.88	1.3				1.57	0.6											3.24	0.66				2.16	2.13	1.74658	1.00715								2.62	0.98
	3.65	2.08				5.45	1.34											2.17	0.84				1.71	0.8	1.85462	0.652445								1.86	0.88
	2.27	0.77				2.61	0.94											3.02	0.65				1.31	11.94	2.45814	0.882708								2.37	1
	3.11	0.39				2.57	1.23											3.06	1.46				1.76	1.37	1.36838	1.36502								2.66	1.22
	2.82	0.34				1.97	1.12											1.65	0.35				1.98	0.19	2.6813	1.1751								2.52	0.97
	3.96	0.12				2.27	1.45											4.26	1.21				2.34	1.58	1.52588	1.20965								2.5	0.94
	2.86	0.19				2.41	1.3											3.6	1.16				1.48	0.83	1.42643	0.50405								1.29	0.95
	2.59	0.47				2.38	1.03											3.44	0.83				2.11	0.85	2.58529	1.29687								2.88	0.33
	2.49	0.77				2.3	1.33											2.53	1.01				1.69	1.31	2.05019	0.712434								1.45	1.04
	3.03	0.55				2.28	1.16											1.98	0.96				2.21	1.33	2.41353	0.969274								1.1	0.81
	3.2	0.27				3.56	1.35											2.22	0.89				1.45	0.46	1.9972	1.18318								1.26	1.96
	3.22	0.49				2.55	0.31											3.02	0.68				1.87	1.34	1.72626	1.22235								1.99	1.26
	4.61	1.79				1.83	1.09											3.35	0.7				2.26	1.32	2.62909	0.949228								1.3	0.61
	4.37	1.17				2.65	1.06											3.95	1.29				2.95	0.24	2.31897	0.867563								1.22	1.01
	2.58	0.18				2.79	1.12											4.52	1.11				1.57	0.71	2.76956	0.871646								1.92	0.73
	4.23	1.53				3.5	0.89											2.72	0.42				1.52	0.42	1.64164	1.36516								2.25	1.26
	3.46	0.84				2.34	1.45											4.86	1.31				3.02	1.65	1.47318	1.63921								2.17	1.3
	3.48	1.2				2.24	1.22											3.53	0.7				2.45	1.31	2.64151	1.08068								1.29	1.1
	3.68	0.44				2.36	0.86											3.6	1.1				1.96	1.45	1.49259	0.924951								2	1.14
	3.57	1.85				3.14	0.81											2.08	1.21				2.71	1.95	2.24584	0.960911								1.97	1
	2.8	0.63				3.25	0.58											3.73	0.78				1.31	1.52	1.62054	1.15892								2.07	1.21
	4.06	1.19				3.15	0.79											3.26	0.55				1.89	1.4	2.2215	0.921865								1.83	1.3
	4.08	1.48				2.69	0.74											3.9	0.79				2.5	1.36	1.61886	1.0279								1.57	1.16
	4.08	1.36				2.17	0.79											2.23	1.08				2.6	0.68	2.42268	0.609552								2.71	0.99
	5.8	0.79				3.48	0.87											3.1	0.76				1.95	1.03	1.44981	0.929799								3.99	0.84
	2.53	0.7				4.03	0.8											1.79	1.03				2.28	1.23	2.49143	0.73801								1.98	1.84
	3.51	0.88				4.15	0.88											3.02	0.57				2.83	0.39	2.51351	0.884187								2.91	1.12
	1.96	1.73				2.44	1.5											2.48	0.79				1.24	1.65	2.20781	1.01284								2.31	0.81
	3.2	0.41				3.18	1.42											2.75	0.51				2.2	0.6	1.60217	0.889488								1.43	0.99
	5.8	0.43				2.31	0.71											3.58	1.23				3.33	0.49	1.78728	1.0052								1.75	1.17
	2.37	0.39				3.19	1.1											4.45	1.02				1.96	0.25	1.90134	0.84428								1.79	0.79
	2.54	0.67				2.22	0.49											3.22	0.74				2.93	1.14	2.54826	0.767998								2.14	0.83
	5.3	1.04				2.78	1.58											4.55	1.04				1.99	1.21	1.31791	0.915103								1.46	0.74
	4.1	2.12				3.65	1.71											5.2	1.07				1.92	1.91	5.80203	3.49741								2.18	0.88
	3.73	1.27				3.37	0.74											3.16	0.81				3.57	1.14	1.64431	1.19896								1.73	1.09
	2.18	1.7				3.81	0.47											2.93	0.94				2.6	1.34	1.47144	0.973767								2.71	0.7
	3.17	0.37				4.92	0.97											2.88	0.87				3.26	0.83	1.80303	1.77072								2.13	0.97
	5.09	0.9				3.67	1.02											2.46	0.55				3.73	0.89	2.58198	1.05927								3.3	1.51
	2.83	1.29				1.83	0.77											3.84	1.33				1.47	0.79	2.00706	0.867898								1.17	0.75
	3.18	1.25				1.71	1.49											3.38	0.67				3.69	0.33	2.22008	1.25125								3.1	1.16
	1.29	2.05				4.93	0.82											4.86	1.4				2.65	0.54	2.4368	0.920296								2.01	0.93
	1.76	1.07				3.28	0.88											2.44	0.81				1.39	0.51	1.96444	1.19619								2.06	0.71
	2.48	0.31				3.84	0.92											2.88	0.61				1.57	0.2	2.26346	1.1118								2.78	0.96
	2.46	1.16				2.15	0.75											3.8	1.06				1.84	0.38	2.07714	0.709677								1.36	1.97
	2.67	1.25				1.78	0.76											2.39	0.84				3.23	0.46	1.64866	0.82694								2.3	1.22
	3.52	1.12				3.19	1.06											3.86	1.18				3.65	0.64	2.15622	1.07419								2.18	0.64
	2.34	0.65				2.72	0.76											2.14	1.32				2.24	0.93	1.33198	1.27573								1.6	0.92
	4.06	1.72				3.15	1.21											3.51	0.98				2.98	1.63	2.82802	0.946461								1.69	1.22
	3.59	1.56				3.23	1.34											5.63	0.55				2.84	1.3	1.36057	0.906892								2.22	1.13
	3.17	1.28				2.79	1.22											3.61	1.29				2.86	1.34	1.94294	0.685392								2.32	0.77
	3.08	1.04				3.25	0.94											2.58	1.17				1.34	0.46	2.08926	0.7006								2.42	0.89
	2.89	1.64				3.82	1.41											3.54	1.49				1.94	0.21	1.29909	1.34885								1.96	0.73
	4.94	1.42				2.08	1.63											3.48	0.75				2.67	1.43	2.04995	0.878689								1.22	1.03
	2.29	0.64				1.7	1.34											4.22	0.92				1.93	0.94	1.69878	0.933023								1.57	1.48
	2.51	0.19				4.29	0.83											3.79	0.88				1.72	0.62	2.45201	1.24418								1.99	1.2
	4.55	1.23				4.09	0.99											3.03	0.78				1.85	0.08	1.92273	0.729471								3.57	1.21
	3.14	0.28				2.71	0.97											3.07	0.73				3.11	1.77	1.50813	0.803392								2.32	0.75
	3.25	0.9				2.22	0.55											3.52	0.88				2.3	1.83	2.14655	0.60328								1.17	2
	2	2.14				3.28	1.24											2.73	0.66				2.86	0.66	2.0908	0.791112								2.1	1.03
	4.74	0.83				4.18	1.3											2.08	0.81				2.25	1.39	2.61307	1.21604								1.93	0.89
	2.55	0.38				3.31	1.29											2.15	0.97				2.05	0.55	2.05291	1.72237								1.88	1.05
	3.02	0.27				2.69	1.34											1.58	0.89				1.75	0.74	1.93485	0.658653								1.55	1.45
	2.34	1.49				3.16	0.73											1.95	1.32				2.11	0.37	1.9507	0.714073								1.52	1.15
	4.59	1.15				5.62	0.88											3.19	1.05				2.31	1.08	2.71512	0.886729								1.28	1.49
	2.69	0.26				2.79	0.88											2.97	0.56				1.22	0.32	2.00419	0.60888								1.77	0.99
	4.35	1.66				3.25	0.94											1.34	0.73				2.14	0.99	2.02269	1.23457								3.51	1.49
	2.86	0.3				5.54	1.57											3.57	1.17				1.8	1.48	2.55865	1.04842								2.18	1.27
	2.38	0.8				3.44	0.71											4.13	1.81				0.97	1.62	2.26657	1.27411								1.88	0.68
	3.83	1.93				2.89	1.12											1.77	1.04				1.57	1.31	1.72511	0.713535								3.13	1.05
	2.81	0.56				5.29	1.02											2.09	0.72				1.23	0.62	1.78368	0.812993								2.55	0.87
	3.04	0.39				2.85	1.93											1.83	0.97				2.34	1.03	1.96605	0.751678								2.24	1.5
	3.58	1.81				3.05	0.86											2.22	0.88				1.14	0.09	2.18788	0.345371								1.9	1.09
	3.4	0.69				3.79	0.95											3.52	1.08				1.96	0.92	1.91537	1.10743								1.52	0.62
	2.56	0.65				3.6	0.76											2.07	1.78				2.34	1.03	2.72537	1.01782								2.41	1.22
	2.04	1.2				3.57	1.31											1.65	1.09				1.93	1.34	3.36153	1.31645								2.44	0.91
	2.22	0.78				2.94	1.11											2.63	0.97				1.41	1.11	1.65918	0.861471								2.22	0.8
	5.23	0.69				3.01	1.38											3.92	0.98				1.29	0.68	1.70557	0.697115								2.51	1.09
	2.29	1.38				3.22	0.7											3.58	1.48				2.12	0.56	2.17825	0.772654								2.35	1.04
	4.28	1.41				3.53	1.14											1.87	1.08				1.34	0.34	1.78115	0.793879								1.84	1.1
	1.83	1.97				2.79	0.94											2.87	0.71				2.04	0.77	1.98847	1.35095								1.51	0.85
	3.24	0.6				2.86	1.29											2.35	0.78				2.31	0.67	2.23898	3.92999								1.63	1.18
	2	1.05				3.55	1.12											3.73	1.93				2.17	1.13	1.40528	0.740764								1.97	1.45
	4.58	0.86				2.69	1.18											2.21	1.34				2.4	0.23	1.48186	1.15284								1.27	1.05
	3.84	1.26				2.29	0.82											1.87	1.19				1.45	1.38	2.13759	1.05417								2.62	0.61
	1.77	1.55				1.58	1.05											2.11	1.23				1.95	1.23	1.40715	0.730617								3.17	1.46
	3.66	0.67				2.57	0.75											3.21	0.71				1.45	0.96	1.87927	2.16433								2.73	1.07
	2.65	0.74				2.79	1.06											1.64	1.16				1.27	1.14	2.46146	1.08891								2.94	1.05
	1.81	1.04				4.2	0.81											3.91	1.15				2.18	1.21	1.47478	0.562241								2.38	0.9
	2.43	1.32				3.44	1.09											3.01	1.11				1.73	1.2	2.34867	0.780662								1.97	0.88
	4.53	1.09				3.27	1.04											3.01	1.02				2.55	0.5	2.4998	1.02557								2.13	0.86
	2.24	1.04				2.03	0.26											3.3	1.77				2.23	0.56	1.78301	0.95638								2.34	1
	3.41	0.24				1.74	0.52											3.6	1.3				1.79	1.44	2.95655	0.766267								2.99	0.76
	2.45	1.89				2.37	0.89											2.7	0.57				1.37	0.39	3.85292	1.27107								1.63	1.36
	3.35	0.2				2.36	0.67											3.57	0.65				1.67	0.95	2.41405	1.30111								1.77	1.17
	3.37	0.47				1.9	0.61											2.58	0.56				2.14	0.99	1.3459	1.002								1.87	0.82
	2.64	0.29				4.95	0.54											2.2	0.49				1.37	0.28	1.51501	0.666701								2.11	0.94
	4.16	1.44				2.9	1.02											3.56	0.88				3.31	1.44	2.15882	1.19437								2.01	1.25
	2.3	0.18				3.57	0.84											3.34	0.88				2.68	1.05	1.80862	1.10213								3.03	0.65
	2.23	0.18				3.02	0.78											2.9	0.74				1.5	0.93	2.29742	0.930545								2.05	0.77
	2.68	0.36				3.15	0.54											2.12	0.95				2.14	1.78	1.75172	0.699557								1.31	0.77
	2.8	0.53				4.22	0.67											4.83	1.29				2.36	0.65	2.44161	0.911252								2.93	0.87
	2.9	0.34				1.76	0.84											4.54	1.17				2.18	0.78	2.48694	1.04625								3.28	0.87
	2.86	1.27				2.29	1.5											3.71	0.69				1.32	0.34	1.98573	0.77079								1.56	0.88
	2.48	1.48				1.65	0.51											3.24	1.47				2.3	1.05	2.13419	0.822902								1.42	1.5
	2.84	0.25				2.89	1.2											2.81	0.71				2.01	1.32	2.05469	0.656756								2.81	1.47
	2.84	0.64				1.73	0.9											4.43	1.31				2.1	1.63	2.22426	1.46022								1.63	1.1
	2.61	0.83				2.21	1.41											2.21	1.28				2.3	0.84	1.90966	1.10659								1.71	1.03
	2.58	1.57				3.28	1.3											2.45	1.29				2.67	1.79	1.41065	1.0124								1.65	0.91
	2.76	0.35				2.91	1.08											2.91	1				1.44	1.93	1.37971	0.780849								2.09	1.37
	3.23	0.69				1.72	0.73											2.58	1.06				1.13	0.18	1.50357	0.62361								2.44	0.78
	4.16	0.96				4.46	1.15											3.88	1				2.55	1.51	1.59489	1.05068								1.95	0.69
	3.52	1.9				2.06	0.62											3.4	1.16				2.45	1.48	1.19643	1.03214								1.98	0.89
	2.92	0.42				2.84	0.85											3.74	1.13				2.47	1.02	1.92961	0.722485								2.22	1.01
	2.94	0.89				2.29	0.53											2.78	0.64				1.77	1.35	1.48839	0.997289								1.62	1.05
	3.62	2.05				1.92	0.68											2.63	0.84				1.24	0.65	2.54221	0.828692								1.91	0.93
	5.64	0.85				2.9	1.19											4.88	1.07				1.69	0.17	2.25688	1.03756								2.63	0.91
	2.56	2				2.34	0.91											4.11	0.69				2.3	0.86	2.36333	0.912824								2.58	0.93
	2.2	1.34				3.08	1.02											3.44	1.6				1.59	0.28	2.07822	1.32063								1.53	2.81
	3.4	1.7				2.22	0.87											3.03	1.15				1.71	0.42	1.90427	0.914457								3.33	1.16
	1.31	1.58				4.05	1.19											3.87	1				3.32	0.23	1.61846	0.884421								2.58	1.13
	2.55	0.36				2.47	1.47											3.39	1.1				2.19	0.55	1.85285	1.10822								1.74	0.96
	2.54	0.97				3.79	2.03											3.05	0.94				2.38	1.59	1.98068	1.06502								1.19	0.86
	2.58	0.51				3.46	0.83											2.52	0.83				2.25	1.47	2.7682	1.73752								1.7	0.77
	2.32	0.24				4.46	1.09											2.88	0.69				1.97	0.98	2.45773	0.99583								1.68	1.04
	3.29	1.06				1.76	0.89											2.82	1.01				2.8	0.35	1.984	1.20743								1.83	1.08
	2.01	0.19				2.06	0.71											2.05	1.03				2.7	0.6	2.0998	1.1279								1.83	0.94
	2.73	1.21				2.15	0.66											5.18	0.97				2.04	1.41	2.26052	0.565426								1.7	1.06
	2.15	0.27				2.42	0.79											1.87	0.77				1.91	0.63	1.74075	0.980789								2.36	1.01
	1.61	1.06				2.69	1											3.17	0.94				2.56	1.65	1.20833	1.35628								1.44	1.03
	2.11	1.65				3.57	0.74											3.47	0.76				2.65	2.16	1.6429	0.876488								1.43	1.13
	1.51	0.5				3.02	0.92											1.86	1.27				1.44	0.29	1.83767	0.840657								1.76	1.49
	2.29	1.1				2.41	1.28											3.08	1.01				2.32	0.81	1.48902	1.58434								1.45	0.83
	2.79	0.36				2.28	0.99											2.37	1.02				2.61	0.4	2.15817	0.898946								2.72	1.1
	2.96	0.22				2.77	1.02											2.27	0.95				2.43	1.51	2.22267	0.804052								2.63	0.98
	2.46	0.31				2.4	0.58											2.77	0.81				2.55	1.66	2.53767	1.12692								1.82	0.97
	3.12	0.26				2.93	1.65											4.8	1.13				1.41	0.19	2.38864	0.619865								2.2	1.42
	2.39	0.86				5.15	1.02											4.89	1.11				3.32	1.2	1.80302	0.79556								1.02	1.21
	3.01	1.02				2.75	0.49											4.98	1.11				2.57	1.87	3.15428	1.16799								2.45	0.8
	3.38	1.61				2.98	1.15											2.09	1.46				2.94	0.39	1.19066	1.97896								1.51	1.33
	2.19	0.98				2.78	0.78											2.88	0.59				2.25	1.7	1.88492	1.91959								1.43	0.99
	2.77	1.08				4.55	1.32											2.48	1.31				2.1	0.86	1.3499	1.09815								2.7	0.69
	4.01	1.72				2.82	1.7											2.16	0.41				2.35	1.3	2.51462	0.730073								3.43	0.94
	2.34	0.75				3.8	1											2.89	0.63				2.28	1.73	1.58637	1.13543								2.76	1.03
	2.66	0.15				5.03	0.95											4.3	1.08				4.57	1.93	1.71884	1.20472								1.38	1.21
	2.42	1.11				2.35	1.09											3.72	1.06				1.83	0.14	1.39489	1.65919								2.54	0.92
	2.44	0.21				3.17	1.07											4.21	0.91				2.12	0.75	1.32672	1.0388								1.18	0.72
	2.18	0.84				3.71	0.79											4.35	0.85				2	0.27	1.93135	1.43656								1.4	0.64
	4.24	0.81				3.62	0.84											3.23	0.65				3	0.34	1.81998	0.781831								1.87	0.76
	2.19	1.77				3.58	1.27											1.97	0.96				2.13	1.6	2.19724	0.9925								1.4	0.86
	2.11	0.86				2.73	1.31											3.15	0.82				2.25	0.8	1.83309	1.00005								1.68	0.88
	3.79	1.65				3.11	0.87											4.33	0.96				2.24	0.47	1.90423	1.28779								1.48	1.56
	3.67	1.38				4.34	0.92											4.43	1.49				1.34	1.29	1.33198	1.18131								3.18	1.15
	3.49	0.95				3.51	0.84											5.44	1.16				2.78	0.26	1.63371	0.740819								1.58	0.85
	1.5	2.06				2.55	0.85											4.27	1.26				1.79	0.27	2.34223	0.985832								1.78	1.32
	2.51	1.32				1.81	0.85											2.53	0.98				2.21	1.79	1.52369	0.699043								2.68	0.94
	3.11	0.26				3.68	1.55											2.88	1.11				2.11	1.27	1.74996	0.683014								1.84	0.64
	3.23	1.18				2.58	1.53											4.12	0.96				2.1	0.85	2.50903	0.943164								3.35	0.8
	2.88	0.29				3.75	1.2											2.44	0.59				2.58	2.12	1.56556	0.715788								1.6	0.79
	2.37	0.5				1.78	0.97											3.16	0.88				1.47	0.81	2.08757	1.02738								2.55	0.81
	2.38	1.32				3.64	1.05											3.7	0.99				2.05	0.6	2.22512	1.0395								2.18	0.88
	2.46	0.67				2.68	0.84											2.89	0.6				3.59	0.34	1.84918	0.822932								1.17	0.62
	2.65	0.64				1.32	1.12											3.49	1.47				2.64	0.87	1.54404	1.22571								1.87	1.12
	3.29	1.32				1.98	1.64											3.4	1.16				3.47	0.24	2.26983	0.786951								3.59	0.72
	2.86	1.22				1.91	0.38											4.13	0.86				1.65	2.15	2.24797	0.788919								1.66	1.76
	2.56	0.62				2.71	1.41											3.59	0.88				1.31	1.21	1.38533	0.704852								2.09	0.76
	2.63	0.45				1.75	0.88											2.54	0.93				1.62	1.82	2.67389	0.969229								1.8	0.63
	2.86	0.94				2.45	1.2											2.17	1.52				1.86	1.76	2.33705	1.0559								2.11	0.48
	4.91	1.96				2.24	1.24											1.63	1.55				1.3	0.14	1.27552	0.512326								2.04	0.83
	3.36	1.13				2.42	2.02											3.7	1.34				1.7	1.5	1.92047	0.871394								2.32	0.61
	3.57	0.68				3.13	1.33											3.97	1.77				2.05	1.67	2.13721	0.784784								2.46	0.98
	2.77	0.46				1.67	0.81											1.77	1.37				1.45	2.41	2.2459	1.03208								1.41	0.73
	2.36	1.82				2.63	0.92											2.12	0.98				2.44	0.36	1.5085	0.468565								1.8	1.1
	5.3	1.27				3.21	0.71											2.7	0.65				2.67	0.8	2.38989	1.18834								2.08	0.6
	3.78	1.19				3.73	0.99											3.46	1.21				1.47	1.21	2.06194	1.03653								3.08	0.92
	2.24	1.33				3.64	0.94											1.78	1.17				1.85	0.81	2.20076	1.05541								2.2	0.76
	5.73	0.89				2.4	0.65											2.75	0.72				1.61	1.22	2.21255	0.884384								1.55	0.72
	3.15	0.24				3.2	1.32											3.39	1.18				1.89	1.65	1.60151	0.564551								2.7	0.77
	2.44	1.34				2.97	1.62											3.14	1.21				1.22	0.5	1.86597	0.583155								1.61	1.92
	2.56	1.13				2.95	0.86											1.77	0.75				1.67	1.33	2.41082	0.661723								3.22	0.75
	2.84	0.4				3.59	0.73											1.89	0.97				2.16	1.23	1.73454	0.623799								1.9	1.53
	2.71	1.39				2.64	1.33											3.15	0.67				1.52	0.37	2.18132	1.14205								2.73	1.08
	4.72	1.35				2.29	1.27											7.11	1.09				1.17	1.72	1.36293	1.8041								1.17	1.95
	2.64	0.21				2.96	0.73											2.4	0.62				2.38	0.42	1.77591	1.27546								1.88	1.31
	2.1	1.26				1.48	1.32											1.8	1.04				1.17	0.16	1.89437	0.689367								2.31	0.84
	2.83	0.28				4.35	0.87											3.07	1.01				1.65	0.3	3.217	0.906344								2.91	0.79
	2.65	1.42				4.19	0.59											2.28	0.78				1.14	0.44	1.4413	0.925345								1.37	0.89
	3.88	1.86				2.68	1.02											2.36	1.26				1.81	0.83	2.05971	0.839696								2.02	0.8
	3.14	0.38				3.27	1.34											2.05	1.06				2.71	0.2	2.33413	1.01856								1.88	0.79
	4.06	1.26				4.5	0.75											2.73	0.87				2.44	0.51	2.93042	0.899573								1.48	0.9
	3.32	0.2				2.8	1.22											2.52	0.9				1.86	1.21	2.13657	1.22562								1.57	0.89
	2.99	1.69				3.01	1.37											3.84	1.11				1.9	1.37	2.05057	0.717957								2.8	1.07
	2.48	1.16				2.23	0.77											3.78	0.87				1.48	0.16	1.75256	0.815209								2.19	1.13
	4.58	1.58				1.95	0.98											3.85	1.01				1.52	1.08	2.26058	1.17156								2.16	1.33
	4.03	1.6				2.62	1.46											1.87	1.36				1.37	0.35	1.68583	1.19111								1.33	0.93
	4.63	1.14				2.97	0.86											4.74	0.9				2.17	0.62	2.19228	0.923359								1.26	0.54
	2.38	1.19				2.79	1.64											3.53	1.37				2.53	1.4	1.76646	1.02753								2.48	1.48
	3.26	0.44				1.93	0.6											3.29	1.05				2.52	1.21	1.78035	1.11865								2.35	1.06
	3.39	0.25				3.77	0.88											2.95	0.83				1.23	0.87	2.4571	1.02145								1.39	0.79
	3.85	0.47				1.76	1.16											4.19	1.43				2.62	0.64	1.7883	0.649599								1.34	1.36
	3.32	0.31				3.23	0.7											1.49	1.36				1.67	1.19	2.12772	1.08791								1.73	0.83
	4.17	1.19				1.89	0.47											3.56	1.08				1.81	1	2.19754	0.746127								2.06	1.18
	3.93	1.1				2.55	1.14											2.56	0.82				1.4	0.22	1.38058	0.721606								1.99	1.46
	1.42	1.18				2.81	1.34											1.88	0.99				1.87	1.13	2.38103	1.13906								1.68	0.96
	2.15	0.61				2.71	0.63											3.59	1.04				1.79	0.42	3.02335	0.917511								2.44	0.92
	3.84	0.94				2.4	1.15											2.2	1.35				2.77	1.65	2.60286	0.883682								1.05	1.28
	2.53	0.17				4.51	0.94											2.62	0.63				2.34	1.24	2.25396	0.843974								1.76	0.62
	3.47	1.89				1.96	1.68											2.05	1.55				2.15	1.29	1.66192	1.03843								2.31	1.13
	2.62	2.57				2.13	0.73											1.77	0.83				2.18	1.87	2.2269	0.868133								1.34	1.18
	2.4	0.2				2.04	1.3											3.68	1.23				2.42	0.83	2.22387	1.02035								1.86	0.7
	2.6	1.14				3.96	0.92											3.26	0.91				2.31	0.7	1.69204	0.65301								0.91	0.66
	2.03	0.32				2.49	0.42											2.44	0.84				2.76	0.99	1.93182	0.644536								1.81	0.93
	1.97	0.63				4.92	1.09											2.4	0.9				2.08	1.25	1.69693	0.994175								2.44	1.04
	2.73	0.75				3.44	1.19											4.31	1.39				1.46	1.52	2.14182	1.43556								1.54	1.31
	1.66	1.42				3.82	1.23											4.47	1.32				1.88	0.23	2.14596	0.908526								2.07	1.18
	3.83	1.61				4.08	0.88											4.12	1.04				2.58	0.8	1.41307	0.401107								1.61	1.04
	3.26	1.26				2.46	1.27											5.94	1.08				2.92	0.98	1.557	0.603914								2.23	0.97
	2.75	1.73				3.05	1.46											3.79	1.06				2.23	1.72	1.45393	1.33584								1.59	1.07
	2.65	0.32				2.99	1.3											3.86	1.16				2.31	1.09	1.96301	0.846371								2.41	0.99
	1.74	1.58				3.96	0.96											3.5	0.55				1.93	0.52	1.67612	0.701028								1.43	0.72
	1.45	0.4				3.35	1.21											2.54	1				1.28	0.08	1.46305	0.878775								2.21	0.87
	2.08	0.36				2.7	0.75											1.98	0.7				2.96	2.16	1.54463	1.87149								2.12	0.86
	3.28	1.67				2.55	0.91											2.61	1.11				2.19	1.14	2.49553	0.723112								1.84	0.94
	3.31	1.35				4.37	0.87											2.91	0.56				2.06	1.51	2.20808	0.585778								1.62	1.5
	5.09	1.45				2.73	1.14											2.34	1.15				2.91	1.08	1.70554	1.193								2.33	0.89
	2.86	0.2				2.65	0.6											1.71	0.79				2.6	1.63	1.78483	1.18661								2.58	0.99
	3.11	1.02				3.96	1.53											2.67	0.85				1.65	1.25	1.45875	1.41886								1.57	1.11
	3.26	0.5				2.53	1.23											2.46	0.7				1.7	0.78	1.57022	0.70962								1.95	1.07
	2	1.31				2.11	1.3											2.52	0.66				1.77	0.57	2.52431	1.04356								1.6	0.72
	2.56	0.77				2.04	0.67											3.06	0.9				2.6	1.14	2.18195	1.06337								2.35	0.89
	3.12	1.1				6.31	1.2											3.52	1.59				1.39	1.13	1.4702	1.50222								2.1	1.4
	2.28	1.46				3.38	1.32											3.95	1.34				2.69	0.58	1.91433	0.874496								2.15	0.89
	3.3	1.31				4.07	0.82											3.8	1.34				2.05	0.96	1.43962	0.539422								2.65	1.31
	2.46	0.9				5.17	0.99											3.01	0.79				1.34	1.27	2.20237	0.832853								2.31	0.9
	2.39	0.52				2.05	0.54											1.66	1.39				2.43	1.1	1.94156	1.01924								1.85	1.05
	2.49	0.37				4.21	0.71											5.43	0.71				1.99	0.68	1.91855	0.641155								1.93	0.74
	2.63	0.28				3.17	1.49											2.09	1.11				1.57	1.25	1.51996	1.15963								2.82	1.55
	4.04	1.63				4.23	0.78											2.87	1				1.99	0.65	2.67209	0.720461								2.95	0.96
	3.08	0.28				4.13	1											1.87	0.76				1.34	1.6	3.10125	1.31291								3.4	0.63
	3.02	0.56				3.35	1.52											2.86	0.61				2.83	1.37	1.65208	0.876249								3.38	0.81
	4.33	1.63				2.78	0.48											3.57	0.74				1.75	0.52	2.81748	0.813055								1.93	0.61
	3.22	0.77				4.96	0.85											2.84	0.76				1.6	0.3	1.63103	0.771804								2.63	0.81
	3.26	1.3				2.82	1.6											2.43	1.24				1.59	0.51	1.30511	0.670564								1.44	0.81
	2.72	0.14				5.44	1.06											3.73	1.31				3.33	0.59	1.8635	1.2002								2.33	0.69
	2.78	0.28				3.68	1.15											3.69	1.09				2.51	1.7	2.45414	0.905186								1.65	0.88
	3.72	1.18				2.61	1.12											3.74	1.04				1.99	0.9	1.81191	1.07031								2.96	1.72
	2.89	0.61				2.8	1.74											2.87	0.58				2.06	1.63	1.63377	0.615592								2.16	1.18
	2.94	0.31				2.66	0.56											3.91	1.53				2.15	0.86	1.92	1.00456								3.45	0.73
	5.24	0.43				2.45	1.18											5.14	1.19				1.7	0.49	2.70096	0.95158								1.96	0.96
	3.79	1.19				1.78	0.76											3.05	0.78				1.56	0.26	1.52214	1.29037								2.91	0.79
	3.2	0.36				1.99	1.13											2.94	0.55				1.8	1.03	1.87857	0.793099								3.03	0.86
	3.76	1.31				3.16	1.13											2.36	0.58				2.97	0.75	2.1998	1.01958								2.63	1.41
	4.05	0.97				3.38	1.11											1.87	1.37				1.6	0.38	2.06964	0.784494								3.77	1.1
	2.41	0.58				2.58	1.03											2.33	0.64				2.01	1.52	2.715	0.743623								2.83	0.81
	3.4	0.27				3.02	1.06											2.39	1.2				1.77	1.11	1.80552	1.53764								2.19	0.58
	3.02	0.37				2.92	0.74											2.31	1.53				2.67	1.52	2.15756	1.26855								1.96	0.95
	2.95	1.49				1.95	0.88											2.73	0.9				2.95	1.3	1.58716	1.20633								2.41	1.11
	4.25	1.7				1.92	1.13											2.92	0.58				3.05	0.54	2.73464	0.98852								1.83	0.71
	3.22	0.14				3.98	0.88											2.29	1.07				1.63	0.38	1.72229	1.18356								2.58	1.38
	2.11	1.14				1.45	0.99											2.4	1.4				2.18	0.87	2.69677	0.822345								2.76	1.14
	4.23	1.5				2.47	1.01											2.56	0.88				2.01	1.4	1.77134	0.822002								4.15	1.1
	2.66	0.9				2.32	0.67											2.31	0.95				2.07	1	1.39439	1.15658								1.86	1.2
	5.38	0.78				3.43	0.9											3.41	1.03				2.85	0.93	2.01603	0.890966								3.06	0.86
	4.3	1.05				2.63	0.9											3.34	0.66				1.59	0.61	1.99014	1.06886								1.71	0.88
	3.23	0.31				1.99	1.2											2.34	0.73				2.66	1.22	2.81165	1.179								2.56	1.14
	3.68	1.21				1.91	0.75											3.86	1.19				2	1.32	2.66785	1.07742								2.05	0.95
	4.18	1.32				3.67	0.79											2.83	0.56				2.13	1.23	1.37448	0.929311								2.14	0.83
	5.05	1.54				1.83	0.44											2.41	1.18				2.28	1.22	1.53918	1.49222								1.61	1.36
	3.12	0.79				3.12	0.8											2.82	0.57				1.64	1.28	1.63319	1.43975								2.91	0.86
	2.69	0.38				2.01	1.09											3.28	0.67				2.19	0.24	2.28481	1.35824								2.64	1.33
	2.52	1.62				3.19	0.91											4.57	1.21				1	0.81	1.96014	0.645616								3.09	0.8
	2.32	1.54				1.8	1.34											3.16	1.4				2.82	1.36	2.15613	0.912931								3.26	0.83
	2.58	1.16				1.67	0.74											3.02	1.14				1.82	0.77	1.6955	1.18712								3.03	1.09
	2.6	0.1				3.23	0.83											2.56	0.81				1.6	1.23	1.43374	1.40921								2.37	0.82
	2.02	2.7				2.34	1.13											1.67	1.05				2.22	0.81	2.04072	0.845741								5.01	0.7
	3.35	0.37				2.47	1.26											2.04	0.81				1.93	1.73	3.51285	1.51543								2.81	0.72
	2.94	0.33				2.4	1.03											3	1.66				2.15	1.5	1.41235	1.38727								1.76	0.78
	3.25	0.62				2.61	1.43											2.6	0.87				2.86	0.19	1.46451	1.24402								1.59	0.71
	2.91	0.35				2.69	1.32											4.62	0.72				2.41	0.29	2.8286	1.32991								2.26	0.79
	3.11	0.61				2.9	1.09											2.72	1.46				1.73	1.05	1.63289	0.746605								2.82	1.12
	3.83	0.23				2.9	0.95											2.62	0.6				2.64	0.33	1.78076	0.871359								2.74	0.86
	2.48	0.4				1.45	2.28											2.22	0.8				2.2	1.3	1.70547	1.12584								2.34	0.89
	4.31	1.15				2.34	0.73											1.96	1.24				1.19	0.63	1.92679	0.936793								2.74	0.63
	2.81	0.27				2.5	1.03											1.93	1.09				4.07	0.25	1.4432	1.07925								2.85	0.89
	2.55	0.35				2.5	1.2											2.51	0.73				1.9	0.96	1.48888	1.29297								1.95	1.18
	3.95	1.91				3.82	0.81											4.52	1.14				2.12	0.62	1.70352	1.59048								3.07	1.24
	2.59	0.53				2.64	1.37											3.51	1.33				1.36	0.11	2.14735	0.805817								1.02	0.79
	2.58	0.51				2.93	0.81											2.2	0.55				2.63	0.18	1.6378	0.91047								0.98	1.54
	2.98	0.27				4.6	0.7											3.01	1.48				1.9	1.18	3.00774	1.08733								2.04	0.86
	3.82	1.28				4.42	1.24											1.93	1.49				2.91	0.22	1.70237	0.601856								1.07	0.91
	3.48	0.32				3.46	0.82											3.56	1.34				2.21	0.38	2.42656	1.68038								3.98	0.83
	2.4	0.52				2.24	1.11											2.5	0.61				1.55	1.71	1.67597	0.938627								1.91	0.86
	3.2	0.55				2.99	1.21											2.02	2.07				1.28	0.12	2.42108	1.3086								1.5	1.25
	3.19	0.29				2.58	1.18											1.12	1.83				1.36	0.96	2.47153	1.14821								1.86	0.91
	2.68	0.7				3.62	1.34											2.04	1.37				2.11	1.53	1.50882	0.650859								1.73	0.81
	2.19	0.4				3.39	1.06											3.8	0.98				2.04	1.13	1.85808	1.0313								1.12	1.61
	2.3	0.48				3.91	1.04											2.46	0.93				1.19	0.19	1.38891	1.05273								2.06	0.93
	2.1	0.8				3.57	0.85											1.83	1.2				2.04	1.14	2.7703	1.10469								1.73	1.05
	2.32	1.82				2.98	0.77											2.04	1.47				1.75	1.03	1.62084	0.958207								2.08	0.82
	1.88	0.9				3.63	0.86											1.25	0.83				1.64	1.05	2.17674	0.536816								1.93	1
	2.47	0.6				4.13	1											3.84	1.24				2.31	0.74	1.84737	0.531659								1.88	1.08
	4.08	0.84				3.88	1.03											4.13	0.79				1.79	0.99	2.98106	0.999943								1.66	1.15
	2.4	0.4				2.74	0.94											4.42	0.9				1.68	0.64	2.17704	0.90406								3.12	0.81
	2.11	0.67				2.54	0.66											4.3	1.25				1.25	0.24	2.7315	1.28917								1.6	0.62
	3.32	1.03				2.01	1.24											2.98	1.12				1.68	1.45	2.23664	0.951361								1.12	0.8
	2.42	0.26				4.04	0.72											3.41	0.76				2.07	1.78	2.06529	1.18578								2.7	1
	3.43	1.22				3.19	0.87											2.38	0.73				1.29	0.27	2.78234	1.07918								1.35	1.27
	3.47	1.77				2.74	1.41											2.03	1.04				2.72	0.46	1.8655	1.10095								2.68	0.94
	2.55	0.59				4.26	0.94											2.82	0.63				2.43	0.95	2.41714	0.899841								1.54	0.93
	3.49	1.53				3.53	1.18											1.98	1.16				1.25	1.33	1.45895	0.642223								1.66	0.94
	4.91	0.72				2.56	0.77											2.49	0.79				3.33	0.15	1.17657	0.778091								1.55	1.13
	2.73	0.81				4.57	0.85											2.84	0.62				3.45	0.92	2.31657	1.05191								2.73	1.04
	2.65	0.63				3.45	0.78											1.89	1.13				2.73	0.47	2.18253	1.12853								1.14	0.85
	1.92	1.34				4.67	0.77											2.65	0.49				1.47	0.9	2.67734	1.01852								1.8	0.88
	3.08	0.62				5.13	0.91											2.98	1.09				1.92	1.83	1.97447	0.34256								2.05	0.62
	2.26	1.23				2.84	0.69											2.87	0.6				3.32	0.78	1.76205	0.576113								1.34	1.25
	3.01	1.5				3.98	1.02											3.22	0.5				1.98	1.11	2.19803	1.0845								1.57	0.75
	1.68	1.78				2.47	2.18											2.74	0.71				2.91	0.11	2.02092	0.513841								1.41	1.53
	2.49	0.73				2.15	1.73											3.49	1.26				2.93	1.38	1.27124	1.12983								2.84	0.96
	2.39	0.42				4.87	0.79											4	0.8				3.12	1	1.81358	1.69668								1.93	1.53
	2.33	1.65				3.26	1.06											1.96	0.75				2.12	1.01	2.44865	0.937562								1.88	1.07
	2.92	0.43				3.14	0.89											3.73	1.22				2.3	1.42	1.45873	0.976821								1.99	0.91
	3.02	1.15				4.26	0.64											3.31	1.18				1.44	0.29	2.55299	0.839006								2.16	0.64
	3.07	1.04				2.13	0.36											2.16	1.62				2.77	1.51	1.93457	0.929745								2.25	0.81
	3.94	1.33				2.76	1.72											2.32	1.1				3.13	0.62	1.77129	0.631931								2.08	0.93
	3.46	1.44				2.23	0.39											2.15	1.31				2.55	1.56	1.43456	1.28436								1.43	0.52
	2.8	0.62				2.14	1.72											2.56	0.81				3.82	0.43	1.16786	1.55307								2.84	0.8
	2.69	0.34				1.83	1											3.2	0.94				2.75	0.93	1.47119	0.817913								1.54	0.85
	3.81	0.65				3.47	0.99											2.77	0.69				2.89	0.24	1.86056	0.8923								2.41	1.21
	2.34	1.46				1.92	0.79											2.74	0.87				1.59	0.4	1.98263	1.28876								2.78	1.23
	3.93	0.24				4.35	0.78											3.67	1.17				2.48	0.87	3.62245	0.766074								3.1	1
	3.57	0.67				4.25	1.11											2.9	1.36				2.08	1.54	1.527	0.868721								2.22	0.95
	2.53	1.74				2.97	1.18											2.83	0.61				2.81	0.86	1.80658	0.885117								1.9	0.59
	1.94	2.12				4.26	0.66											3.34	0.66				3.12	1.05	2.39212	1.04116								3.06	0.67
	2.57	0.44				2.61	1.66											3.78	0.76				1.9	0.77	1.4895	1.35034								2.12	0.91
	2.28	1.15				2.66	1.2											3.47	0.83				2.72	1.23	2.26211	0.743983								2.87	0.72
	3.65	1.87				2.38	0.82											3.49	0.97				1.55	0.11	2.11753	1.06058								1.54	0.67
	2.19	1.58				2.29	1.04											2.88	0.68				2.39	0.92	1.7012	0.768788								2.67	1.05
	4.31	1.18				2.4	1.39											2.38	1.34				2.26	0.86	1.37871	0.863188								3.36	1.22
	2.54	2.07				2.07	0.81											3.99	1.38				3.26	1.5	2.03914	0.821513								4.52	0.95
	2.75	0.31				1.6	0.68											3.82	1.07				2.24	0.61	2.03739	1.87401								1.67	1.41
	2.1	0.99				5.27	0.83											2.29	1.14				2.74	1.51	1.44249	1.62335								2.61	0.73
	3.22	0.33				3.82	0.86											2.79	0.92				1.74	1.75	1.40204	0.338137								1.64	1.09
	2.79	0.49				1.53	0.83											4.68	0.79				2.23	1.69	1.65546	0.914913								2.51	0.84
	2.79	0.37				2.72	0.95											4.96	1.16				3.06	0.56	2.90363	0.831276								3.05	0.76
	4.07	0.65				1.68	0.64											1.6	0.95				2.21	2.3	1.96838	1.12111								2.45	0.67
	3.21	0.26				2.42	1.38											3.66	1.4				2.26	1.71	1.09888	1.65342								2.98	1.18
	4.04	1.6				2.33	1.15											2.42	1.4				2.47	1.12	2.4627	1.0843								2.31	0.75
	2.22	1.5				3.73	0.82											2.11	0.68				2.11	0.98	2.15833	1.13291								3.25	1.15
	2.41	1.43				3.04	1.01											2.32	0.83				2.54	1.72	2.04944	1.16718								3.71	0.9
	4.02	1.13				2.16	0.67											3.08	0.59				2.46	1.66	1.474	0.432725								1.17	0.53
	3.51	1.09				2.84	0.96											3.52	1.17				2.89	0.93	1.5835	0.785589								2.97	0.8
	3.04	0.8				2.67	0.9											2.19	0.73				2.52	1.51	2.30516	0.960327								1.59	0.96
	2.02	1.92				3.18	1.11											3.04	0.46				2.19	0.33	2.14618	1.05873								2.13	0.55
	2.56	0.26				3.37	1.1											3.53	1				1.51	2.21	1.25306	1.44455								2.66	1.23
	5.44	0.64				2.58	1.55											3.58	0.59				1.43	0.84	1.67849	0.48304								2.12	0.7
	3.18	1.37				2.37	0.64											2.34	1.4				1.53	0.12	1.62308	0.605209								2.7	0.84
	4.75	1.17				3.47	2											3.44	0.52				2.93	1.03	1.80766	0.935712								2.34	1.08
	3.01	0.67				2.6	0.67											3.84	1.57				2.62	0.77	1.81976	0.457652								1.96	0.64
	3.88	0.86				2.52	0.83											3.69	0.9				1.64	1.84	2.16582	0.913476								2.03	1
	2.98	0.56				4.23	0.83											2.78	0.7				2.6	1.28	1.61653	0.553282								1.68	0.66
	3.79	1.84				3.98	0.84											2.66	0.86				1.38	0.98	1.98316	0.711812								1.82	1
	4.42	1.64				1.9	1.25											2.94	0.52				1.71	1.65	1.81425	0.618649								1.75	1.13
	2.75	0.45				4.03	0.9											4.25	1.07				1.07	0.09	2.11708	1.02607								1.4	0.82
	2.63	0.46				2.57	2.08											3.76	0.95				2.65	0.27	1.47372	0.644871								1.9	0.97
	2.4	1.19				2.06	0.78											3.73	1.21				1.4	2.14	1.64621	0.690922								1.56	0.68
	4.47	1.11				1.99	1.02											2.7	0.85				2.67	0.15	1.70392	0.974072								2.07	1.08
	2.29	1.62				2.68	0.82											2.44	0.99				1.01	2.2	2.57949	0.573972								1.82	1.62
	3.17	0.45				1.82	0.97											2.11	0.81				1.44	0.99	2.42343	0.989883								1.99	0.82
	2.31	0.64				3.11	1.09											4.42	1.28				1.38	0.26	2.85275	1.08641								1.52	1.33
	3.27	0.37				5.07	0.8											2.89	1				1.64	0.26	1.34592	1.78623								3.5	0.65
	3.05	0.56				2.44	0.55											2.39	0.97				1.48	0.82	2.28427	1.02025								2.49	0.92
	3.53	1.19				3.14	1.07											4.63	1.3				1.48	0.88	1.66675	0.986644								2.47	1.1
	2.85	1.08				1.84	0.63											2.77	0.81				1.42	0.48	2.27773	1.07518								3.69	0.84
	3.22	0.44				2.27	1.05											2.27	0.58				1.92	1.64	2.10521	0.93197								1.78	0.99
	3.56	1.72				3.83	0.86											2.4	0.7				1.84	2.02	1.98352	1.13681								1.23	0.94
	3.12	0.36				2.48	0.86											2.15	0.71				2.41	1.18	1.50081	1.12082								2.81	1.11
	3.62	1.37				2.66	0.98											3.4	0.82				2.49	1.14	2.2243	0.938483								1.48	0.7
	2.65	0.79				1.95	0.66											2.16	0.92				2.06	0.78	2.75957	1.25293								1.19	1.22
	2.02	1.43				3.96	0.87											2.86	0.77				1.97	1.06	1.37394	1.28417								1.53	0.93
	2.08	0.33				1.88	0.66											2.92	0.61				1.9	1.25	2.65842	0.939236								1.68	0.79
	2.14	1.3				2.77	1.73											2.37	1.03				2.69	2.02	2.22114	1.30798								3.01	0.8
	3.04	1.4				3.11	0.85											3.22	0.58				2.79	0.12	2.21903	0.879036								1.91	1
	1.79	0.5				4.6	0.78											2.21	0.91				1.46	0.51	1.89412	0.984142								1.51	1.2
	2.89	1.6				4.57	0.69											2.03	1.03				2.9	0.3	2.03984	1.09114								1.29	1
	2.26	0.99				3.03	1.08											1.53	1.17				2.21	1.93	2.10459	1.00333								1.96	0.85
	1.92	0.44				3.21	1.54											4.26	1.41				1.44	1.39	1.98679	1.13286								1.57	1.47
	2.2	0.45				2.9	1.02											2.82	1.08				1.97	1.36	1.65398	0.92057								1.69	1.45
	2.58	0.57				4.45	0.84											3.08	0.99				1.55	0.5	1.62842	0.685001								2.48	0.94
	3.41	1.41				3.03	1.09											2.75	0.73				2.14	0.72	2.77212	0.851339								1.17	1.19
	2.93	1.02				4	1.41											2.16	1.47				2.34	1.23	1.76843	0.6227								2.11	0.92
	2.59	1.18				4.56	1.01											1.73	0.99				1.55	1.05	2.19246	1.14597								1.31	0.82
	4.78	1.57				3.49	1.37											2.16	1.17				2.03	1.35	2.84065	1.37979								1.43	1.47
	3.36	1.23				2.94	0.96											2.98	1.43				2.74	1.02	1.91527	1.58991								1.5	1.68
	3.06	0.31				2.92	1.22											2.41	0.94				1.58	0.34	3.1376	1.18534								1.29	1.03
	3.04	0.22				3.21	1.31											2.9	0.54				3.04	0.71	1.82732	0.896976								1.6	0.83
	1.53	1.41				2.7	1.2											2.49	0.66				1.3	0.56	1.54432	1.00707								2.23	1.19
	2.36	0.88				2.83	0.76											1.77	1.11				2.04	1.2	2.04885	0.801063								1.66	0.9
	2.71	0.67				5.08	0.92											3.79	1.34				2.01	1.05	2.32743	0.872827								1.86	0.69
	3.61	1.29				3.45	1.22											3.92	1.03				1.52	0.88	1.14352	1.0367								1.55	1.82
	2.28	2.03				4.21	1.12											2.99	0.76				1.63	0.41	2.45047	0.68514								2.13	1.94
	2.08	1.55				2.54	0.98											2.07	1.26				2.07	1.99	1.93959	1.71316								2.12	1.04
	1.87	1.53				2.41	0.82											3.29	1.35				2.26	1.26	2.39122	1.31708								1.63	0.54
	2.25	0.75				3.44	1.2											3	0.69				2.21	1.24	2.58072	1.19215								2.58	0.87
	4.36	0.73				3.46	1.17											3.88	0.97				1.78	0.82	1.88799	1.12647								1.64	1.08
	1.81	0.76				3.27	1											2.35	0.88				2.63	1.07	1.52766	0.622594								1.65	0.98
	2.51	0.5				3.11	1.48											3.92	1.35				2.12	1.27	1.73701	0.740095								1.21	1.65
	2.46	0.34				4.6	0.81											1.56	1.02				1.49	0.72	3.4597	0.609055								1.25	1.58
	2.9	0.26				2.62	1.18											2.26	0.93				2.24	1.06	1.46833	1.27951								2.45	0.91
	2.33	0.33				2.5	0.95											4.2	1.1				2.79	1.56	1.72166	1.00346								1.71	0.97
	3.44	1.12				3.41	0.96											2.45	0.97				1.59	0.15	2.02995	1.13595								2.58	0.66
	2.03	1.87				3.28	0.66											3.52	1.18				2.87	1.02	1.40852	1.36426								1.73	0.93
	2.35	1.17				3.47	0.78											3.88	1.29				1.27	0.38	2.24602	0.867347								2.36	0.76
	2.62	1.15				2.28	1.15											3.65	1.6				2.23	1.97	1.59142	0.892003								1.52	1.58
	3.35	0.51				4.73	1.42											3.09	0.66				2.78	1.08	3.46514	0.965923								2.59	1
	2.32	1.69				4.72	1.08											2.54	0.62				1.43	0.16	1.52834	1.13965								2.86	0.81
	2.26	0.84				2.45	1.03											2.68	0.78				2.49	0.82	1.06052	0.7979								1.82	0.92
	4.98	1.48				4.11	1.02											2.27	1.58				1.83	0.94	2.00874	0.657032								2.27	1.13
	3.94	1.95				2.6	0.77											3.54	1.46				2.8	0.61	1.56107	1.11992								0.98	0.4
	3.85	1.48				3.44	0.71											4.15	0.8				2.72	0.78	1.81522	1.24007								1.63	0.45
	2.96	0.26				2.36	0.57											2.18	1.26				4.79	0.1	1.96717	0.39613								2.06	0.86
	2.22	1.06				3.15	1.34											2.66	0.57				2.2	1.59	1.526	0.765322								1.64	1.18
	3.03	0.83				2.85	0.84											2.95	0.36				2.61	0.26	2.11244	0.878305								3.01	1.49
	3.12	0.27				2.29	0.76											3.59	1.42				2.61	0.69	1.57108	1.17139								1.98	0.57
	2.42	1.37				1.86	0.41											2.1	0.86				2.93	0.07	1.72931	0.924983								1.22	1.55
	2.51	0.39				2.95	0.44											4.01	1.45				2.3	1	1.97115	0.45581								1.42	0.81
	3.59	1.06				2.5	1.68											4.06	0.92				2.24	1.23	1.26158	0.847625								4.03	0.96
	3.11	0.28				2.4	0.88											2.5	0.83				1.96	0.07	2.55086	1.39162								2.17	0.85
	3.42	0.47				2.95	1											3.39	1.4				2.79	1.27	1.52402	1.19653								3.39	1.14
	3.29	1.33				2.87	0.64											4.24	1.15				2.02	1.66	1.58032	1.25371								1.19	0.72
	3.84	1.59				2.16	0.92											1.99	0.78				2.09	1.78	2.74082	1.37616								1.72	0.93
	2.72	0.44				2.63	0.65											3.1	1.06				1.79	0.99	1.82818	0.882864								1.33	1.42
	3.67	0.9				1.19	1.27											2.3	1.07				2.4	1.75	1.57519	1.04287								2.77	1.12
	2.88	1.87				2.97	0.7											2.74	0.74				2.39	1.07	1.46587	1.51214								1.49	1.22
	2.1	1.7				2.37	1.36											2.54	0.93				2.12	0.71	1.8559	1.07352								2.67	1.35
	2.48	0.47				3.56	0.7											4.51	1.19				1.7	0.67	2.29504	1.02983								1.67	0.81
	4.49	1.91				2.67	0.81											1.64	0.84				1.97	0.7	2.39586	0.686912								3.54	0.87
	3.2	0.39				2.68	1.35											2.02	0.94				2.84	1.09	4.0026	1.02676								1.03	0.7
	3.79	1				3.56	1.33											1.95	1.27				3.01	1.12	1.90049	0.696734								1.49	0.79
	3.4	0.32				1.54	1.34											3.94	1.19				1.66	0.15	2.53839	1.12018								2.81	0.88
	2.82	0.39				1.99	1.89											4.22	1.15				2.17	1.75	1.85261	2.01825								1.2	0.59
	3.02	0.18				7.48	0.58											2.17	1.2				2.46	0.96	1.55549	0.876298								1.06	0.48
	1.85	1.04				2.69	1.1											3.48	1.4				3	0.69	1.60108	1.01354								2.58	0.84
	3.2	1.71				2.58	0.87											2.27	1.44				1.88	0.29	2.30056	0.715293								3.1	0.83
	2.51	0.96				3.2	1.29											2.31	0.57				2.77	0.2	2.35641	0.705505								1.45	1.09
	1.65	0.88				3.65	1.46											3.76	0.8				1.31	1.22	2.19613	1.11644								1.54	1
	2.37	1.44				2.8	1.85											3.62	0.86				3.09	0.94	2.02716	1.00078								2.73	0.81
	3.01	0.46				3.35	1.43											2.4	1.41				2.46	1.27	2.05804	1.16339								2.6	0.82
	3.58	0.97				1.89	0.85											2.53	0.84				2.46	2.03	1.84053	0.631096								1.53	1
	3.49	0.57				2.68	1.15											4.43	0.9				2.94	0.87	2.47081	1.21675								2.12	0.86
	3.22	0.8				2.37	0.62											3.11	0.6				1.74	0.7	2.84153	1.41867								2.23	1.01
	5.1	1.15				2.53	0.84											4.49	1.1				2.71	0.56	1.41372	0.53342								2.47	1.42
	2.31	1				5.07	0.86											3.24	0.99				1.25	0.73	1.55166	1.23666								1.76	0.88
	3.53	1.19				2.65	0.6											1.81	0.64				2.64	1.17	2.39751	1.13227								1.35	1.39
	3.08	0.21				4.44	1.12											2.76	0.62				3.09	0.62	2.16511	0.997091								1.87	0.87
	2.82	0.32				4.01	0.42											3.04	0.59				2.98	0.71	2.02214	0.947633								1.56	1.09
	2.13	1.69				2.42	1.01											4.35	1.16				1.9	1.51	2.83394	1.57056								1.81	1.01
	2.43	1.83				1.68	0.72											3.64	1.25				2.48	0.86	1.83902	0.724781								1.44	0.68
	3.8	1.46				3.29	1.54											2.19	1.07				2.57	1.14	2.75464	0.860458								1.97	1.04
	2.03	0.35				3.03	1.16											3.98	1.08				2.24	1.44	2.49011	0.823145								1.77	1.72
	2.5	1.79				3.72	0.86											3.26	0.94				2.1	1.1	2.00458	1.05268								2.12	0.91
	2.81	0.51				2.88	1.83											3.34	0.91				1.7	1.59	1.95495	0.719337								1.13	1.2
	2.84	0.31				3.25	1.23											3.23	0.7				1.37	1.09	2.59474	1.63588								1.98	0.68
	2.18	0.39				2.28	0.94											2.26	1.13				2.21	1.46	1.36863	0.660948								1.14	0.89
	2.73	1.36				3.14	1.18											4.7	1.34				1.37	0.63	2.84416	0.894444								1.3	1.04
	1.96	1.31				4.49	0.7											2.02	0.85				1.12	0.17	1.45677	0.899255								2.63	0.65
	1.49	0.76				4.34	0.96											2.94	0.57				2.05	0.99	2.38306	0.97946								1.17	1.05
	1.95	1.14				2.63	0.96											2.76	0.87				1.67	1.98	1.65111	1.24068								2.2	0.67
	2.83	1.54				3.27	0.54											3.35	0.63				0.97	1.86	2.281	0.991104								3.19	0.79
	2.79	0.7				3.96	0.96											3.4	1.25				1.71	0.68	2.48143	1.59326								2.33	1.47
	1.83	0.87				2.18	0.33											2.87	0.98				1.88	1.91	2.8784	0.94931								2.23	1.23
	3.9	1.44				2.84	0.3											4.47	1.18				1.43	1.36	1.90111	0.913725								1.89	0.77
	4.04	1.64				3.07	0.59											2.03	1.03				1.93	1.13	2.10909	1.23232								1.63	0.94
	1.95	1.39				1.99	0.97											2.59	0.73				1.72	1.01	2.21494	1.52061								1.71	0.84
	2.95	0.93				2.01	1.01											2.43	0.92				1.28	0.76	2.21627	0.420516								2.41	0.94
	3.09	0.35				2.95	1.12											1.92	1.54				1.86	1	1.42036	0.855464								2.25	0.66
	1.74	1.87				3.81	1.05											1.87	1.39				2.59	0.3	1.28407	0.901967								2.4	0.8
	2.13	0.82				3.55	1.31											3.13	1.17				2.5	0.13	2.55072	1.18932								1.78	1.08
	2.89	1.26				3.61	1											3.44	0.64				1.89	0.86	2.26961	1.34132								2.67	1.37
	2.02	1.11				2.84	0.97											3.59	1.49				1.09	0.35	1.99347	1.43099								2.78	0.88
	3.48	1.39				2.37	0.56											2.47	0.75				1.92	0.89	1.53992	0.805014								1.16	0.93
	2.43	0.64				4.44	0.77											4.53	1.56				1.78	1.7	2.54547	1.17013								2.62	0.75
	3.21	1.18				3.46	0.78											2.4	1.01				1.45	0.53	2.7114	1.20572								1.98	0.92
	4.32	1.81				2	0.99											3.16	0.61				2.31	1.18	1.16704	0.818877								1.47	0.6
	5.75	0.38				3.29	0.91											2.1	1.1				1.1	1.15	2.43297	1.10472								1.75	0.72
	3.23	0.67				1.95	0.7											2.66	0.76				3.79	1.29	2.97729	0.965144								1.75	1.19
	2.57	1.26				3.67	1.42											1.88	1.35				2.26	1.17	2.02846	1.10878								1.74	1.08
	2.03	1.44				3.37	1.05											3.61	1.15				1.94	1.38	2.13321	1.30603								2.31	0.91
	4.43	1.21				2.68	1.15											2.86	1.13				2.29	1.43	1.2141	0.736844								1.61	0.64
	5.12	1.79				3.15	1.09											2.45	0.77				1.39	0.18	2.665	1.14748								2.31	0.93
	3.34	0.36				2.73	1.42											2.61	0.47				1.68	1	1.88222	0.914441								1.53	0.88
	2.07	1.01				4.26	0.96											4.72	0.84				2.47	1.07	2.63282	0.956801								1.83	0.83
	4.33	1.68				2.77	0.56											1.9	1.54				2.83	0.97	1.92337	1.37424								2.79	0.99
	4.47	1.68				7.16	1.02											1.72	1.42				2.57	1.16	1.94844	1.04593								2.15	0.94
	3.55	0.45				2.73	1.36											5.19	0.61				3.34	0.4	2.20564	0.569378								1.72	1.6
	2.91	0.78				3.54	0.98											2.57	0.74				1.97	1.26	1.27117	0.485749								1.67	1.38
	1.95	1.19				3.29	1.58											2.78	0.78				1.72	1.11	1.90056	0.951965								2.15	0.84
	4.01	1.11				4.67	0.46											2.33	0.79				1.62	1.46	2.51289	1.21843								1.96	0.88
	3.7	1.11				4.16	0.67											1.68	1.25				2.14	1.62	1.66901	0.82672								2.32	0.68
	2.8	0.42				2.79	1.36											1.81	1.08				2.32	1.14	2.98218	0.757972								2.75	0.82
	2.12	1.9				3.97	1.34											3.75	0.88				2.38	1.25	2.12862	0.639285								2.1	0.97
	4.89	0.79				5.76	0.95											2.97	0.6				2.61	1.02	1.74737	0.901312								1.91	1.06
	3.2	0.02				3.89	0.72											2.52	0.67				2.76	0.67	1.65082	1.13721								1.93	0.73
	2.79	0.15				2.95	0.9											3.29	1.3				4.06	1.46	2.55476	0.984909								1.74	0.73
	1.75	1.82				3.94	1.11											3.54	1.55				2.07	1.39	1.67716	0.916973								2.72	0.72
	3.52	0.56				4.59	0.99											4.15	1.05				2.51	1.32	1.74909	1.2349								2.23	0.63
	3.96	1.1				4.03	1.09											2.19	1.33				2.05	1.38	1.80413	0.770385								2.74	1.34
	2.49	0.38				2.2	0.98											3.38	1.42				2.12	1.82	1.74805	1.59543								2.1	0.88
	4.85	1.37				3.08	0.88											4.05	1.28				2.81	2.34	2.4251	1.01198								2.12	1
	2.86	0.17				3.19	0.95											2.65	0.62				2.69	1.23	2.1096	1.00288								2.67	0.82
	2.21	0.41				3.43	0.82											2.45	1.57				3.03	1.31	2.18922	0.686789								1.65	1.08
	3.73	1.13				5.06	1.06											3.53	0.83				2.9	0.95	1.73383	0.542816								3.27	1.12
	2.23	0.91				2.08	1.05											2.25	1.23				2	1.9	1.69467	0.754269								2.27	0.97
	2.82	0.86				2.35	0.82											3.28	1.35				3.58	0.32	1.76953	0.668814								2.19	1.85
	3.83	1.47				2.94	0.74											3.06	0.81				2.8	0.91	2.46554	0.647384								1.8	1.07
	3.77	1.06				2.11	1.04											2.25	0.98				1.8	1.21	1.79267	0.771079								2.46	0.63
	2.85	0.22				1.98	0.61											2.4	0.72				3.12	0.15	2.63078	0.990719								2.04	0.82
	1.84	1.59				2.06	0.55											2.07	1.38				2.93	0.68	2.71295	0.909723								1.67	1.09
	4.07	0.9				1.45	0.43											2.52	1.37				2.58	1.1	1.69813	0.710491								2.53	0.93
	3.29	1.04				2.47	1.03											3.48	1.43				2.52	0.79	2.16002	0.668558								1.24	1.2
	2.63	1				2.86	0.56											1.84	1.01				1.51	0.53	1.58841	0.956915								1.61	0.97
	3.24	1.75				2.68	0.94											2.76	0.76				1.93	1.55	2.51419	0.170367								1.09	1.32
	4.25	1.72				2.65	1.51											3.59	1.41				2.64	1.1	1.96965	0.66005								2.71	1.19
	2.85	0.92				1.92	1.22											2.76	0.89				1.48	0.76	3.09375	1.14557								2.21	1.06
	2.73	0.74				2.44	1.49											2.08	0.98				1.96	1.39	1.72714	0.824268								2.02	1.07
	2.09	1.32				2.6	0.98											2.66	0.58				3.57	0.26	2.22948	0.967849								1.89	1.13
	1.77	0.8				3.96	0.92											2.13	1.56				2.79	0.4	1.82765	0.955218								2.04	0.9
	2.67	0.32				2.81	0.54											3.3	0.72				2.52	1.21	1.9565	0.826744								1.64	2.1
	2.61	0.34				2.63	1.13											4.49	0.78				3.31	1.18	1.98416	0.727972								1.88	0.75
	2.74	0.44				3.89	1.08											2.51	0.62				1.75	0.98	1.46194	1.49134								1.82	1.27
	2.58	1.34				2.71	1.17											3.77	1.62				2.87	0.36	1.50568	0.654129								1.51	2.38
	2.53	0.39				2.4	1.51											5.27	1.2				1.28	1.28	2.58015	1.01618								1.7	0.94
	3.39	1.52				2.88	1.03											3.33	1.36				2.51	1.14	2.1075	0.914632								1.82	1.42
	3.65	0.93				1.78	0.94											4.34	1.72				2.19	1.51	1.67864	0.883736								1.93	0.88
	2.24	0.4				2.97	1.27											2.46	1				2.69	2.08	2.89397	1.37351								2.04	1.02
	3.02	1.54				2.38	0.57											2.14	1.06				2.02	0.15	2.1112	0.695873								2.3	1.08
	2.71	0.31				2.23	0.66											2.27	1.67				1.65	0.55	2.17854	0.689272								1.35	1.15
	2.06	0.71				3.15	1.24											2.46	1.38				1.79	1.26	2.17472	0.770767								1.9	0.96
	3.21	0.95				3.32	1.13											3.19	0.83				2.31	1.66	1.756	0.701517								2.31	0.73
	3.59	1.51				3.63	1.09											2.62	0.68				1.48	1.56	1.7381	1.09933								2.15	1.14
	3.26	1.44				2.9	1.34											2.86	0.72				2.91	0.34	2.81193	0.592775								1.63	1.51
	1.85	1.43				2.88	0.89											2.96	1.16				1.64	0.86	2.41179	1.06658								1.95	1.77
	4.23	1.9				2.16	1.21											3.3	0.74				2.38	1.04	2.35727	1.46195								1.76	1.1
	2.27	0.28				2.66	1.19											2.52	1.11				3.54	0.09	1.48217	0.271291								1.43	1.26
	2.29	0.44				3.07	1.12											4.21	0.88				1.82	0.43	1.61306	0.852987								2.67	1.02
	2.43	0.88				2.69	1.28											3.49	1.03				1.69	1.42	2.02522	1.2212								1.75	0.97
	2.92	0.47				2.55	2.29											2.26	0.85				4.08	1.06	1.82337	0.90114								1.29	1.44
	3.3	1.66				2.58	1.07											3.26	0.95				2.28	0.96	1.96666	0.685653								1.83	1.3
	2.25	0.93				2.89	0.94											4.22	1.3				2.87	1.38	2.34442	0.913093								2.52	0.86
	4.05	0.85				3.78	1.45											2.37	1.52				1.99	1.01	1.57224	1.04404								1.47	1.02
	4.5	1.1				4.34	0.8											2.03	1.21				2.87	1.42	2.30447	1.01196								2.75	0.87
	4.2	1.24				4.53	0.9											2.6	0.59				1.47	0.34	3.06969	1.12292								2.03	0.85
	2.45	0.26				1.98	0.85											3.62	1.14				2.53	1.11	2.65173	0.823196								2.64	1.14
	4.51	1.45				2.5	1.26											2.94	0.76				1.73	0.24	2.59325	0.990178								3.64	0.99
	1.85	1.42				3.47	0.34											2.17	1.17				1.86	1.27	1.75438	1.01511								2.39	0.72
	2.55	0.23				4.18	0.69											3.94	0.99				1.45	2.41	1.55838	1.27782								2.81	0.89
	2.81	1.25				3.41	0.99											2.43	1.27				2.13	0.99	2.22356	0.881395								1.78	0.83
	3.48	0.58				3.77	1.23											2.84	0.71				1.35	1.12	2.23583	1.31974								2.7	0.69
	2.26	0.63				2.59	0.92											3.22	0.69				2.1	0.42	1.63139	0.609883								1.89	0.8
	4.67	0.98				4.52	0.68											4.33	1.15				3.14	0.8	1.40808	1.29588								2.81	0.69
	3.11	1.04				2.62	1.1											3.19	0.66				1.26	1.28	2.12972	0.586223								1.6	0.98
	3.04	0.21				2.89	1.18											3.88	1.18				1.82	1.55	1.97404	0.776063								1.32	1.12
	3.33	0.98				4.28	0.73											2.4	1.04				1.39	0.23	3.15501	0.834636								1.68	2.71
	3.13	0.15				4	0.54											2.84	0.67				1.36	1.01	1.9156	0.964085								2.74	0.88
	2.53	0.5				3.56	1.14											2.89	0.86				2.02	1.41	1.65816	1.06513								2.35	1.33
	1.94	0.95				3.56	1.24											5.32	1.31				1.11	0.15	1.61691	0.960072								2.41	0.96
	6.08	1.03				4.66	0.74											4.39	1.28				2.5	1.16	1.84964	1.00536								2.65	1.23
	3.16	2				3.75	1.02											2.21	1.15				2.74	0.19	1.38818	1.65246								1.76	0.87
	2.41	1.06				4.35	0.78											2.3	1.33				2.68	0.22	1.2643	1.51084								3.14	0.75
	1.97	1.32				4.29	0.72											3.33	0.87				1.9	1.81	1.50007	0.665154								2.78	0.87
	2.63	0.3				3.14	0.67											3.29	1.26				1.38	0.96	2.81662	1.10355								2.94	0.73
	4.13	0.99				2.42	1											2.37	1.63				1.75	1.27	1.67234	0.556228								1.76	1.07
	2.83	0.4				2.1	0.88											3.77	1.51				2.2	0.61	2.28642	1.16113								2.15	1.19
	2.72	0.45				1.83	1.45											1.91	0.93				2	1.04	1.35651	0.84479								2.02	0.79
	4.29	1.5				3.14	0.82											3.41	0.63				2.49	0.62	1.884	0.421135								1.2	1.48
	3.58	1.28				3	1.13											3.66	0.88				1.28	0.49	1.98263	1.25211								3.29	1.29
	3.14	0.4				3.59	0.76											3.6	1.23				1.49	0.89	2.78664	1.67031								2.49	0.87
	4.11	1.52				3.1	1.61											3.87	0.9				1.79	2.57	3.18101	0.721097								1.62	1.08
	2.53	1.24				2.92	1.41											3.89	1.08				2.92	0.23	2.63382	1.1718								2.12	0.96
	2.86	0.74				2.53	0.64											2.73	0.84				1.41	0.36	2.39136	1.11583								1.39	0.81
	2.15	1.12				2.86	1.52											3.11	1.26				1.58	0.86	1.91631	1.51122								2.52	0.87
	3.09	0.16				2.5	0.71											3.41	1.42				1.99	1.44	1.9779	0.899302								1.71	0.78
	1.9	0.56				2.98	1.61											2.24	1.5				1.81	0.99	2.00218	0.398615								2.14	0.64
	5.46	1.26				2.37	0.71											2.7	0.58				1.59	0.18	2.19428	1.01564								2.25	0.7
	3.03	0.3				4.23	0.88											2.84	0.87				1.37	0.19	1.73834	1.1944								1.65	1.18
	2.62	0.29				3.18	1.34											1.4	1.14				2.17	1.17	2.45892	0.776582								1.65	0.99
	2.79	0.3				2.67	0.7											2.76	0.66				1.69	1.34	1.53947	0.567191								2.28	1.17
	3.56	1.56				2.11	0.33											3.3	0.71				1.57	0.42	2.09208	1.08553								2.53	1.18
	2.85	0.3				3.13	1											3.98	1.11				2.16	1.22	1.61174	1.02642								2.93	0.86
	3.79	1.41				1.99	1.2											2.55	1.08				2.11	1.61	1.24983	1.02025								2.21	1.64
	1.9	0.86				2.95	1.04											3.32	0.96				2.38	1.36	2.65132	0.996438								2.59	1
	4.3	0.68				2.58	1.17											1.64	0.98				1.91	0.98	1.6478	0.709602								2.17	0.94
	3.47	1.26				2.14	1.49											3.19	0.66				1.97	1.8	1.90598	1.13058								2.58	0.74
	3.66	1.43				2.32	0.63											3.37	1.25				1.63	0.85	2.39707	0.754374								1.65	1.04
	2.33	1.06				2.19	0.94											2.62	0.96				2.63	1.07	1.56235	0.647397								2.75	0.85
	3.26	0.25				3.16	0.97											2.07	1.05				2.15	1.01	1.90633	2.23167								2.68	0.96
	1.94	0.89				2.66	1.27											2.94	1.45				2.72	1.38	1.7168	0.869948								2.77	1.12
	2.32	1.76				3.94	0.93											2.72	0.83				1.76	1.3	2.31309	0.883016								1.65	0.92
	1.53	1.78				5.45	1.01											3.27	1.42				2.93	0.58	1.84603	0.990621								1.23	2.01
	2.98	1.21				4.44	0.67											3.54	0.85				3.46	0.44	2.20381	0.730544								1.72	0.75
	1.85	1.25				2.23	1.07											1.53	1.43				1.88	1.78	2.29513	1.05133								1.43	0.6
	3.06	1.41				2.05	1.31											2.71	0.81				2.73	0.29	2.36139	0.68719								1.76	1.01
	2.5	0.26				3.78	1.22											2.56	0.64				2.58	1.95	2.61307	0.963211								2.83	1.43
	3.69	1.23				4.21	0.92											1.81	0.84				3.61	1.02	1.37976	0.85263								1.78	0.85
	2.39	0.26				4.5	0.75											2.63	1.23				1.36	0.21	1.51898	0.701872								1.95	1.52
	1.82	2.31				2.83	1.46											2.28	0.8				3.38	0.16	1.55848	1.33647								2.28	0.86
	3.5	1.16				2.81	1.19											3.93	1.28				2.63	1.49	1.60944	0.638813								2.37	0.7
	2.69	1.66				3.41	1.6											2.53	0.75				1.47	0.78	2.19578	1.11321								1.45	1.55
	4.42	1.88				1.99	0.96											3.44	0.77				2.79	0.15	1.8579	0.798898								2.24	0.93
	4.01	1.23				2.46	1.16											2.5	0.58				1.61	0.42	1.82498	1.0339								2.34	1.42
	2.81	1.22				2.18	1.08											1.97	1.45				1.51	0.9	2.25643	0.662637								3.37	1.43
	1.76	1.07				1.64	0.87											2.55	0.62				1.48	0.91	2.18935	0.965423								2.12	0.95
	2.46	0.81				2.91	1.25											2.93	1.02				1.71	1.3	2.55145	1.07487								1.36	1.21
	2.35	0.66				1.53	1.02											2.83	1.09				2.17	1.06	3.41061	0.874107								1.78	0.8
	3.56	1.17				2.2	1.21											2.24	1.19				1.76	1.14	1.61253	1.84681								1.28	0.9
	3.08	1.85				3.09	1.15											2.8	0.69				1.62	1.08	1.31858	0.814657								3.42	0.97
	2.22	1.48				2.71	0.7											2.28	1.85				3.53	0.77	2.15359	1.0169								2.24	0.87
	2.99	1				1.87	1.21											2.29	1.19				1.7	1.09	3.1388	0.80683								2.32	0.86
	2.27	1.18				3.81	0.92											3.64	0.89				2.24	1.49	2.87452	1.29195								1.99	0.74
	3.43	0.23				2.71	1.02											3.64	1.25				2.13	1	1.68638	1.20396								1.33	0.81
	2.94	0.67				2.65	1.43											2.56	0.71				3.05	1.21	2.08537	1.07328								2.33	0.69
	3.59	0.87				3.06	1.28											2.91	0.62				2.67	0.6	2.32635	0.802842								2.28	0.82
	2.02	0.76				4.51	0.59											2.61	0.48				2.4	1.23	1.70624	0.948972								2.96	0.76
	2.46	0.92				3.25	0.98											2.63	0.53				3.05	0.13	1.77326	0.669338								2.12	0.9
	3.07	0.32				2.63	1.39											4.36	1.06				1.84	0.11	1.52847	1.06999								1.95	0.9
	3.71	1.44				2.79	1.06											4.49	0.89				2.78	0.61	2.06795	0.782579								2.42	1.02
	3.01	1.54				3.35	0.75											2.53	1.27				1.77	1.71	1.87392	0.860434								1.54	0.75
	4.05	2.34				3.34	0.89											2.8	0.65				1.37	1.27	2.38282	1.01852								2.86	2.11
	2.6	0.31				3.35	1.07											2.92	0.68				1.75	0.78	2.19083	0.687085								2.31	1.13
	2.37	0.87				2.46	0.64											3.59	0.66				1.94	1.19	1.73579	1.06172								2.32	1.26
	3.04	0.42				2.23	1.37											2.46	0.8				3.04	1.4	1.22679	0.860031								1.87	1.21
	2.15	2.13				3.52	0.77											2.98	0.7				2.37	1.37	1.6454	1.08763								1.91	1.18
	6.2	0.49				2.95	1.02											3.95	1.25				2	0.93	1.1934	1.02038								2.71	1.08
	3.21	0.48				2.7	1.43											1.94	1.08				1.45	0.37	2.55268	1.07998								3.11	0.77
	2.22	0.97				2.56	0.81											2.44	0.99				2.34	1.02	1.89122	0.849351								2.4	1.04
	2.26	1.75				2.98	1.33											3.39	0.73				2.14	0.25	2.09787	0.820309								2.31	0.83
	2.41	1.3				2.41	0.98											4.38	1.03				1.53	0.62	2.90341	0.90094								2.8	0.79
	5.79	0.5				3.14	1.61											3.43	1.69				2.09	0.74	2.41512	1.46073								2.61	0.89
	2.8	0.29				3.42	1.08											2.37	0.68				2.41	1.37	2.72723	1.33321								3.38	0.98
	3.08	0.29				2.74	1.49											2.32	0.82				2.19	1.53	2.10194	0.813564								2.66	0.82
	2.93	0.62				3.02	0.53											3.02	0.8				2.38	0.51	2.83992	1.01937								2.27	0.69
	2.25	1.48				3.57	0.61											2.67	0.76				1.43	1.71	1.6871	0.481467								3.27	0.9
	3.06	0.23				3	1.39											2.16	0.5				2.06	1.1	2.06727	1.027								3.02	0.68
	2.07	1.48				2.47	1.45											3.3	1.61				1.37	1.2	2.20514	0.978856								1.5	0.98
	2.01	0.91				4.72	0.83											4.73	0.92				1.87	1.57	2.21485	0.800573								1.8	0.67
	3.77	1.72				2.6	0.73											4.48	0.99				2.15	1.2	2.58715	1.11423								2.18	0.97
	2.41	0.5				3.54	1.31											3.59	1.28				2.93	1.55	2.57227	1.3263								1.65	0.96
	3.85	1.62				2.95	1.55											4.05	1.1				2.97	0.77	1.76228	1.25758								1.74	0.9
	3.17	0.73				3.03	1.1											2.92	0.61				3.08	0.56	3.8207	1.40758								2.89	1.05
	3.28	1.74				3.21	1.34											2.72	1.1				2.11	1.49	4.20686	0.961503								1.77	0.7
	3.24	0.41				4.06	1.01											2.6	0.77				2.91	0.28	1.8072	0.59079								2.79	0.93
	9.28	1.4				2.84	0.97											5.45	0.63				2.11	1.75	2.58486	1.3251								3.27	1.26
	2	1.7				3.59	0.97											1.82	1.29				2.03	1.28	1.62939	0.961333								2.86	0.94
	3.13	0.12				3.15	1.02											3.4	0.79				2.47	1.09	2.9227	1.00054								2.15	0.51
	4.01	1.31				4.04	0.58											2.74	0.49				2.64	1.12	1.37009	1.27098								2.97	1.52
	4.15	1.46				3.61	1.35											3.37	0.73				2.64	1	1.52025	0.845066								2.88	0.94
	2.18	1.41				3.48	1.14											3.17	0.69				3	1.1	1.66561	1.51399								2.49	0.57
	2.73	0.31				3.16	1.01											2.24	0.71				2.3	1.94	2.49261	1.60595								1.75	0.69
	1.93	1.18				3.49	1.1											3.36	0.91				1.51	0.86	2.16972	0.866248								1.81	1.16
	3.76	1.21				3.95	0.65											5.84	0.59				1.57	1.4	1.61013	0.948262								2.66	0.63
	3.38	0.61				3.19	0.88											2.72	0.76				2.15	0.25	2.61711	1.09724								1.68	0.93
	1.81	1.97				2.54	0.95											2.39	1.06				1.46	1.55	2.48386	0.84382								1.82	1.53
	3.28	0.19				2.22	0.81											3.11	0.77				2.34	0.12	2.9146	1.0552								2.53	1.02
	3.81	2.05				2.58	0.92											3.66	1.09				1.43	0.71	1.5022	0.556107								3.01	0.99
	3.35	0.86				2.93	0.79											3.28	0.71				1.79	1.37	2.55884	1.13851								2.16	1.14
	2.62	0.86				3.96	0.83											3.27	0.7				1.74	1.31	2.1791	0.710291								2.67	1.12
	3.1	0.37				2.9	1.39											3.76	1.39				2.02	0.77	2.23843	0.990063								2.45	0.95
	3.15	0.65				4.25	0.84											2.43	0.88				2.59	0.52	1.50606	1.45217								2.31	0.73
	2.16	0.78				3.47	1.16											2.68	0.69				1.05	1.16	2.37348	0.665648								2.11	0.56
	3.63	1.55				3.12	1.25											3.27	1.44				1.81	1.06	2.53081	1.24892								2.55	0.77
	3.08	0.19				2.7	1.81											2.66	0.87				1.66	0.98	1.44334	0.936269								2.33	0.81
	2.28	2.02				2.29	0.91											3.53	0.73				2.33	1.64	2.03463	0.822686								1.69	0.96
	3.2	1.44				3.61	1.47											3.07	0.59				1.89	1.42	2.20288	0.640464								2.49	0.64
	2.74	1.59				3.5	0.67											1.96	1.31				2.51	0.41	1.71867	0.849164								1.51	0.75
	2.65	1.86				2.13	0.77											4.13	0.77				2.68	0.46	1.4904	1.25427								1.93	0.79
	2.9	1.1				4.64	0.98											3.18	1.02				2.29	2.93	1.82226	0.686589								3.36	1.15
	3.17	1.08				2.18	0.81											3.85	1.11				1.29	0.86	1.75992	0.916076								1.83	0.59
	2.3	0.59				3.17	0.47											3.19	1.61				2.4	0.4	2.07306	0.494277								2.78	0.71
	1.6	0.78				5.07	0.39											3.41	1.12				2.32	1.77	2.54278	1.25413								3.11	1.36
	3.09	1.71				2.78	1.07											3.14	1.08				2.45	1.03	1.62235	1.00809								0.91	0.71
	2.76	1.56				1.97	0.77											2.57	1.13				1.74	1.52	2.414	1.62955								2.1	1.13
	3.08	0.52				1.79	1.13											3.02	0.6				1.58	0.73	1.62007	0.738896								1.7	1.09
	2.03	0.29				3.28	1.32											3.56	1.55				1.29	0.26	1.54864	1.27344								1.48	1.29
	2.53	0.98				2.73	0.88											2.77	0.9				2.26	2.16	2.19353	1.03915								1.52	1.33
	4.56	0.74				2.97	1.16											2.01	0.71				2.37	1.06	1.9	1.31886								1.37	1.13
	3.65	1.09				3.19	1.22											3.89	1.3				1.61	0.9	1.44649	1.09657								2.35	0.9
	1.43	1.07				4.18	0.84											2.18	0.67				1.55	0.23	1.4298	0.617359								2.38	1.45
	3.14	1.07				2.99	0.51											1.87	1.28				1.54	1.24	1.23262	0.323129								2.24	1
	3.68	2.31				2.27	1.05											2.51	0.96				2.2	1.73	1.79001	1.13955								1.49	2.05
	2.03	0.45				1.4	0.93											2.89	1.42				1.27	0.83	1.44401	1.32968								1.98	1.01
	3.04	0.54				3.58	0.84											2.74	1.28				1.67	1.2	2.25408	0.878212								2.42	1.32
	2.33	0.67				4.13	1.06											2.49	2.13				2.8	0.87	1.32478	0.805835								1.84	0.91
	1.92	1.87				3.43	1											1.93	1.84				3.78	0.27	2.06849	0.797039								2.31	0.85
	1.88	2.14				2.99	0.63											2.06	0.87				1.91	0.2	2.18468	0.71475								1.9	0.99
	2.31	0.4				3.89	0.75											1.81	1.28				2.14	1.04	3.03638	0.48294								1.8	0.91
	1.65	1.81				1.85	0.79											1.98	1.08				2.75	1.48	2.82538	0.79397								1.69	1.12
	3.11	1.07				2.79	1.11											1.85	1.72				2.9	0.22	1.99283	1.03745								2.6	1.17
	3.08	0.27				2.51	1.05											2.09	0.89				2.51	0.96	1.47487	0.994289								1.88	1.03
	3.46	0.76				2.52	1.09											2.96	0.93				3.73	0.18	1.86218	0.242796								1.97	1.11
	4.23	1.29				2.44	0.89											3.59	0.55				1.35	0.28	2.23032	0.956677								1.61	1.2
	3.02	0.37				2.18	0.49											2.93	0.72				2.26	1.67	2.36989	1.1673								1.36	1.63
	2.7	1.56				2.4	1.16											1.84	1.48				3.18	1	1.85796	1.01719								1.18	0.92
	3.99	0.8				2.27	1.25											2	1.3				2.32	1.38	2.60077	1.01727								3.03	1.03
	1.94	0.96				2.46	1.29											4.33	1.04				1.65	2.12	1.73735	0.743602								2.65	1.3
	3.5	0.96				3.56	0.8											2.19	0.86				2.69	1.01	2.30672	1.25346								2.04	1.22
	2.83	0.39				2.95	1.06											2.03	0.94				1.82	1.17	2.47379	1.33413								2.41	0.91
	2.03	1.17				2.37	0.53											1.89	0.91				2.44	1.67	2.23525	0.599116								1.62	0.97
	5.26	0.23				3.73	1.11											2.65	0.58				1.43	0.66	0.979665	1.04329								2.64	1.12
	3.94	1.26				2.98	0.73											3.53	1				2.37	1.41	2.27416	0.972995								2.03	0.85
	2.43	0.47				3.3	0.55											3.38	0.91				3.22	0.66	2.67711	0.77846								3.37	0.95
	3.24	1.34				4.48	0.77											2.26	1.13				2.64	1.06	2.70125	1.2316								2.19	0.92
	2.42	1.37				2.91	0.81											2.91	0.81				3.46	0.31	2.02135	1.37786								2.15	0.62
	2.68	0.82				2.01	0.54											2.18	1.25				2.63	1.1	2.06459	1.28261								2.9	0.67
	4.03	1.3				2.34	0.18											3.84	1.33				1.14	1.45	1.38229	0.80303								1.56	1.32
	3.32	1.8				4	0.76											2.31	1.1				1.9	1.46	2.38422	0.515753								2.6	0.85
	2.64	0.47				1.93	0.52											4.36	1.7				2.33	1.3	1.54194	0.886696								1.86	1.15
	2.95	0.21				1.96	0.73											2.6	0.79				2.16	0.97	2.18797	1.08638								2.11	1.16
	2.81	0.48				3.65	0.84											1.88	0.86				2.78	1.36	1.38824	1.44872								2.53	0.88
	2.66	0.85				2.02	1.8											3.87	1.03				2.26	1.63	1.47617	1.34841								2.1	1.63
	2.88	0.5				3.41	0.88											4.26	1.22				1.66	1.06	1.94723	1.3116								1.23	1.29
	3	0.34				3.75	1.38											2.1	0.64				2.04	2	3.13658	0.816251								1.79	1.94
	3.08	0.37				3.53	1.24											3.53	1.23				2.34	0.98	1.92753	0.9874								3.3	0.73
	2.3	2.03				2.37	0.97											4.72	0.97				3.05	0.44	2.08094	0.849431								2.56	0.83
	1.99	1.42				2.53	1.13											2.1	1.8				1.68	1.38	2.27161	0.83592								1.96	0.77
	2.66	0.52				2.24	1.24											2.62	0.74				2.54	1.11	1.73009	0.926255								1.93	1.18
	3.82	1.82				4.61	0.91											3.46	0.79				2.21	1.12	1.89268	0.72879								1.39	0.61
	3.72	0.49				2.72	1.05											4.24	1.02				1.81	0.36	1.76002	1.25222								1.85	0.82
	3.61	2.11				3.51	1.05											2.51	0.71				2.42	1.13	2.16654	0.964362								2.76	1.1
	4.04	1.88				2.93	1.07											3.48	1.04				2.48	0.74	1.96618	0.710311								1.7	0.93
	5.44	0.51				3.55	1.03											2.36	1.32				1.38	1.1	1.70422	1.37664								2.09	0.77
	2	1.24				2.93	1.55											2.15	1.11				2.39	1.36	2.04319	1.13873								1.47	0.96
	5.23	1.02				3.34	0.9											3.21	0.8				3.26	0.33	1.38328	0.447437								2.88	0.79
	3.45	0.54				2.72	1.16											2.72	0.82				2.26	1.06	1.50415	1.32123								2.55	1.16
	4.48	1.44				3.25	0.94											5	1.23				2.55	1.53	1.23176	1.02408								1.75	0.82
	2.37	1.28				4.32	0.94											2.09	1.51				2.2	1.29	1.76668	1.0183								2.66	0.76
	2.18	1.63				4.35	0.96											3.57	1.5				2.57	1.3	1.77245	1.07515								2.07	0.95
	2.64	1.9				4.55	0.63											3.35	0.99				2.7	1.82	1.40813	2.42198								1.61	0.87
	2.36	0.68				3.15	1.43											2.56	0.65				1.65	0.11	2.72616	1.27428								1.76	1.07
	2.67	1.07				2.47	1.19											2.56	0.74				3.07	2.21	2.03253	0.765252								1.59	1.37
	3	0.6				4.48	1.03											2.65	0.83				2.83	0.74	1.29989	1.18907								2.11	0.88
	2.29	0.83				4.58	0.54											3.59	1.07				2.18	0.81	1.5537	0.859183								1.44	1.27
	2.76	0.29				3.52	0.44											2.24	0.73				2.18	1.47	3.25955	0.925135								3.21	0.82
	3.32	0.39				3.08	1.19											2.59	0.84				1.99	0.76	2.81634	1.03856								1.81	1.15
	2.76	0.36				3.33	1.3											2.1	1.07				2.76	1.27	2.6476	1.47183								2.13	0.96
	4.62	1.5				2.73	0.41											3.95	0.8				2.97	1.33	2.7406	0.898541								2.36	0.91
	4.07	0.77				4.76	0.79											4.27	0.9				4.07	0.47	2.20649	0.942318								1.34	0.53
	1.91	1.36				3.12	0.59											2.49	0.82				1.78	1.02	2.32517	0.942396								1.71	0.84
	3.73	1.71				3.65	0.5											2.08	0.92				1.77	1.58	2.6544	0.760804								2.55	0.99
	2.27	1.1				2.26	0.92											2.37	1.22				2.19	1.58	2.39327	1.54297								1.95	1.09
	3.06	0.27				2.3	0.65											3.57	0.76				1.79	0.92	1.92793	0.590123								2.54	0.57
	4.14	1.21				4.74	1.14											3.83	1.28				1.12	0.23	2.35946	1.20423								1.39	1.24
	2.39	1.2				2.86	1.06											2.18	1.19				2.42	1.41	2.70266	0.827693								1.27	0.99
	2.78	1.16				2.25	0.72											4.12	1.02				2.2	0.13	1.2753	2.26224								2.01	1.02
	2.71	0.5				3.9	1.24											8.58	0.75				1.06	0.23	2.00968	0.753912								1.55	0.7
	1.66	0.57				3.29	0.61											2.81	0.72				1.16	0.58	2.00884	1.08015								3.5	0.97
	2.12	1.96				4.03	0.55											1.95	0.74				1.28	0.79	2.12581	1.16269								1.94	1.13
	2.05	0.52				3.88	0.77											4.49	1.13				1.66	1.04	1.86969	1.32942								1.63	0.62
	1.88	0.84				4.52	0.68											1.7	1.1				1.57	2.31	1.65118	0.618896								2.07	1.07
	3.02	1.53				3.1	1.79											3.7	1.18				1.41	0.93	2.10069	1.0954								1.57	1.54
	2.63	0.2				2.29	1.02											3.35	0.6				2.26	0.53	2.21264	1.50429								1.21	1.58
	2.48	0.71				4.56	0.95											3.91	1.13				2.6	0.22	2.2871	1.40211								1.32	0.86
	1.99	0.61				3.6	0.77											2.31	0.8				1.29	0.92	2.41249	0.980664								2.8	0.77
	2.15	1.19				2.03	1.78											3.04	0.67				1.61	1.99	1.81463	0.660584								1.55	0.74
	2.22	0.76				3.44	0.91											1.98	1.31				3.06	0.44	2.2693	1.44581								2.02	0.93
	2.3	0.21				3.25	0.66											2.97	0.64				2.06	0.96	1.97219	1.22489								2.06	1.02
	3.55	1.66				2.39	1.72											2.64	0.74				1.11	1.2	1.36362	1.69855								2.13	0.75
	3.2	0.56				2.63	1.06											3.33	0.92				1.29	0.15	2.02701	0.693816								1.8	0.85
	1.89	1.12				1.66	0.77											5.24	0.91				1.15	0.84	2.84086	1.04508								3.34	0.88
	2.86	0.36				3.15	0.83											2.83	0.56				2.14	0.57	2.23359	0.873323								1.27	1.22
	2.04	0.9				2.24	0.99											3.1	0.73				1.69	1.26	1.34356	1.36801								2.38	1.28
	3.32	1.54				3.56	1.08											2.1	0.86				1.91	1.16	2.01165	0.741659								1.78	0.64
	2.72	0.26				3.71	0.69											2.08	1.51				1.38	0.36	2.33823	0.794138								2.04	0.78
	3.44	0.97				2.29	1.13											1.98	0.72				1.55	0.32	2.16103	1.02811								3.53	1.01
	4.53	1.07				4.66	0.73											3.82	1.31				1.89	1.08	2.40441	1.04623								3.78	0.76
	3.49	0.3				3.36	1.06											4.42	1.23				2.13	0.57	1.44846	1.35798								2.97	0.86
	4.05	1.41				3.53	0.78											2.83	0.96				1.56	0.37	2.66493	1.26999								1.63	1.61
	3.5	1.18				2.71	1.02											2.82	0.74				1.76	1.58	1.49024	0.544885								1.87	1.23
	3.17	0.66				1.52	0.74											3.74	1.57				2.02	1.99	3.02915	1.2537								1.76	1.27
	3.84	1.33				2.57	1.4											3.54	0.99				3.17	0.3	2.34122	1.19793								2.23	1.29
	2.05	1.76				3.28	1.68											3.67	1.22				2.71	1.45	2.16518	1.02161								1.75	1.39
	3.72	1.15				2.44	1.01											3.46	0.9				2.41	0.88	2.44159	0.971483								1.64	0.86
	3.13	1.48				3.26	0.74											1.82	0.81				2.4	1.57	2.38061	0.682299								1.44	1.9
	4.19	1.47				2.91	1.59											2.61	1.08				1.79	0.27	2.25088	0.955347								1.74	1.04
	3.2	0.3				2.24	0.56											3.47	1.36				1.96	1.43	1.60342	1.02168								2.07	0.72
	1.82	0.55				3.46	0.73											1.74	1.04				2.15	1.23	2.39941	0.88009								1.29	1.18
	3.73	1.33				3.01	0.48											3.49	1.01				1.98	0.22	1.90637	0.8219								2.25	1.21
	3.56	1.71				3.12	1.8											1.61	1.82				2.83	1.23	2.10567	0.600846								2.19	1.1
	3.2	0.75				3.88	1.33											3.17	1.06				5	1.76	2.0485	1.11145								2.25	1.03
	3.99	1.56				4.1	1.54											2.85	1.16				2.61	1.08	2.18857	0.545187								3.8	0.99
	3.2	0.26				2.42	0.6											2.97	1.18				1.93	1.06	1.56392	0.68499								1.57	1.49
	5.58	1.2				3.49	1.8											2	1.15				1.93	1.22	1.84443	0.834043								2.34	0.94
	3.6	1.27				3.82	0.71											2.07	1.07				3.12	0.12	2.84037	1.06309								1.61	1.19
	2.72	0.27				3.11	0.9											1.6	1.21				4.07	1.04	1.80065	0.957767								1.89	1.04
	3.57	0.95				4.12	0.83											2.68	0.83				2.56	0.88	2.01948	1.13871								1.29	0.82
	3.55	0.49				4	1.09											1.71	1.41				2.15	0.19	3.00101	1.53586								2.39	0.89
	7.85	0.31				2.83	1.37											3.71	1.48				4.23	1.02	2.4525	1.14161								2.74	0.8
	1.77	0.94				3	3.42											1.62	1.62				1.84	1.45	1.96291	1.22256								1.76	1.31
	3.73	1.34				4.62	1.04											2.46	1.56				2.71	0.7	1.78438	0.599258								2.9	1
	3.72	0.95				4.08	1.02											3.04	0.96				2.02	0.59	1.66515	1.06683								2.48	0.85
	3.01	0.26				2.63	1.48											2.93	1.03				2.75	0.69	1.54623	1.39925								1.29	1.37
	3.42	1.98				3.66	1.02											2.88	0.61				2.87	0.79	1.60229	0.999859								1.69	1.34
	2.57	0.43				3.01	1.5											3.49	1.32				1.48	0.54	2.33663	0.868158								1.91	0.72
	3.28	0.35				5.36	0.95											2.13	0.73				2.2	1.11	2.43898	0.96269								1.73	0.8
	3.58	1.28				3.14	0.98											2.55	0.7				3.27	1.04	1.99864	0.812886								1.07	0.88
	2.34	1.58				3.36	0.38											2.25	1.13				2.11	1.69	2.22217	0.869953								1.91	1.15
	4.95	2.31				2.85	1.03											2.57	0.91				2.98	1.09	2.68584	1.22586								2.43	1.15
	4.56	1.43				4.23	0.9											2.35	0.66				2.28	0.85	1.92606	0.756484								1.51	1.37
	2.57	0.55				2.39	0.72											3.86	1.05				1.91	1.11	1.52324	0.791559								1.3	0.56
	2.87	0.23				3.03	0.65											2.24	0.68				2.04	1.26	1.79115	1.0418								2.92	0.96
	5.18	1.01				3.1	1.95											2.16	1.05				3.17	0.28	1.73578	1.17747								2.32	0.72
	3.7	1.13				2.61	0.97											2.17	1.24				3.53	1.1	2.36688	0.995129								1.7	1.11
	2.74	0.36				2.18	0.9											3.94	1.24				1.45	0.42	2.36231	0.811792								1.43	1.69
	1.97	1.25				2.81	1.48											3.44	1.49				1.85	1.61	2.76452	1.2157								2.39	1.69
	3.97	1.41				2.46	0.86											3.01	0.67				2.2	1	2.0574	0.683712								2.12	1.14
	3.05	0.88				2.17	0.86											2.03	0.88				3.05	0.44	1.31316	0.561683								2.04	0.88
	4.05	1.31				1.46	0.99											2.9	0.98				2.3	0.24	2.0246	0.818437								3.47	0.92
	4.28	1.73				1.95	1.13											3.34	0.99				2.72	1.31	2.76869	1.32302								3.23	0.69
	5.11	1.02				2.5	0.78											4.12	1.15				1.88	1.51	1.99265	0.990535								1.38	0.93
	2.27	0.96				1.53	1.05											3.05	0.7				2.39	0.93	2.17627	0.843071								2.61	0.89
	2.59	1.24				2.23	0.49											2.35	0.96				1.74	0.45	1.41141	1.00869								3.6	1.02
	3.53	0.92				3.48	1.24											4.3	1.2				2.59	0.85	1.69392	0.429819								2.64	0.77
[truncated: 22,270 more rows]
