# Supplementary material for: Extrusion-modulated DnaA activity oscillations coordinate DNA replication with biomass growth
Source: eLife. 2025 Nov 18;14:RP107214. doi: 10.7554/eLife.107214 (PMC12626423; doi:10.7554/eLife.107214)
Supplement: Figure 5—source data 1. [file elife-107214-fig5-data1.xlsx]

## Sheet: Figure. 5A
Fig. 5A
MGCL1 containg Psyn66-lacZ or Pcon-lacZ plasmid cultivated in various medium
Cultivation medium: M1									Cultivation medium: M2									Cultivation medium: M3									Cultivation medium: M6									Cultivation medium: M12									Cultivation medium: M13
original data									original data									original data									original data									original data									original data
Psyn66-lacZ		Pcon-lacZ		Binned Cell volume (µm3)	Rel. DnaA activity (ksyn66-1)				Psyn66-lacZ		Pcon-lacZ		Binned Cell volume (µm3)	Rel. DnaA activity (ksyn66-1)				Psyn66-lacZ		Pcon-lacZ		Binned Cell volume (µm3)	Rel. DnaA activity (ksyn66-1)				Psyn66-lacZ		Pcon-lacZ		Binned Cell volume (µm3)	Rel. DnaA activity (ksyn66-1)				Psyn66-lacZ		Pcon-lacZ		Binned Cell volume (µm3)	Rel. DnaA activity (ksyn66-1)				Psyn66-lacZ		Pcon-lacZ		Binned Cell volume (µm3)
Cell volume (µm3)	Rel. lacZ mRNA conc. lacZ mRNA FISH intensity per cell volume, normalized to populational average	Cell volume (µm3)	Rel. lacZ mRNA conc. lacZ mRNA FISH intensity per cell volume, normalized to populational average						Cell volume (µm3)	Rel. lacZ mRNA conc. lacZ mRNA FISH intensity per cell volume, normalized to populational average	Cell volume (µm3)	Rel. lacZ mRNA conc. lacZ mRNA FISH intensity per cell volume, normalized to populational average						Cell volume (µm3)	Rel. lacZ mRNA conc. lacZ mRNA FISH intensity per cell volume, normalized to populational average	Cell volume (µm3)	Rel. lacZ mRNA conc. lacZ mRNA FISH intensity per cell volume, normalized to populational average						Cell volume (µm3)	Rel. lacZ mRNA conc. lacZ mRNA FISH intensity per cell volume, normalized to populational average	Cell volume (µm3)	Rel. lacZ mRNA conc. lacZ mRNA FISH intensity per cell volume, normalized to populational average						Cell volume (µm3)	Rel. lacZ mRNA conc. lacZ mRNA FISH intensity per cell volume, normalized to populational average	Cell volume (µm3)	Rel. lacZ mRNA conc. lacZ mRNA FISH intensity per cell volume, normalized to populational average						Cell volume (µm3)	Rel. lacZ mRNA conc. lacZ mRNA FISH intensity per cell volume, normalized to populational average	Cell volume (µm3)	Rel. lacZ mRNA conc. lacZ mRNA FISH intensity per cell volume, normalized to populational average
					Mean	SEM	Smoothed datat							Mean	SEM	Smoothed datat							Mean	SEM	Smoothed datat							Mean	SEM	Smoothed datat							Mean	SEM	Smoothed datat
2.78	1.24	4.83	0.78	1.7	0.85	0.048117	0.811614		3.34	1.44523	2.55	0.86	1.6	0.956205	0.0607449	1.04124		1.67	1.02	1.9	0.86	1.4	2.62858	0.28492	2.60941		1.28	0.16	1.57	1.13	1.1	1.52846	0.114001	1.39569		1.84	1.02	2.32	1.78	1.2	1.98202	0.137666	2.06136		1.63	0.47	1.44	0.85	0.9
1.97	0.5	2.32	1.36	1.8	0.93	0.044036	0.903741		1.89	1.74513	2.87	1.18	1.7	1.07506	0.0790409	0.971341		1.66	1.95	1.71	1.05	1.5	2.25165	0.140262	2.37943		1.16	1.66	2.65	1.08	1.2	1.79159	0.0744774	1.84566		1.83	1.39	2.6	0.81	1.3	2.41418	0.129253	2.33578		1.52	1.27	1.53	1.1	1
2.18	0.15	1.94	0.61	1.9	0.99	0.036571	1.01746		2.73	1.87453	4.2	0.86	1.8	0.977582	0.0875212	0.934942		3.45	2.19	2.16	1.13	1.6	2.32657	0.12597	2.15002		1.56	0.7	1.89	0.77	1.3	1.9542	0.0672285	2.20852		0.97	0.95	2.87	0.77	1.4	2.66292	0.201755	2.50919		1.59	1.13	1.17	1.79	1.1
2.68	0.43	1.7	0.5	2	1.06	0.039946	1.15134		2.56	0.146419	5.57	0.93	1.9	0.925143	0.0516909	0.93264		1.5	1.61	2.41	0.95	1.7	1.8984	0.118157	1.92478		1.61	0.9	1.97	0.76	1.4	2.46327	0.0843482	2.47668		1.32	0.96	2.52	0.55	1.5	2.42499	0.156261	2.58222		1.29	0.83	1.24	1.19	1.2
2.23	0.98	2.36	0.92	2.1	1.25	0.040644	1.3039		2.67	0.112575	2	0.71	2	0.931591	0.0605089	0.963407		2.6	1.43	2.98	1.37	1.8	1.73537	0.103132	1.70401		1.86	1.5	2.14	1.13	1.5	2.71594	0.0955191	2.65474		1.34	0.53	2.99	0.87	1.6	2.51673	0.142838	2.54827		1.24	0.84	1.13	2.1	1.3
1.56	1.07	2.97	1.53	2.2	1.44	0.054679	1.47457		2.73	0.486508	1.76	0.96	2.1	0.993192	0.040285	1.0248		2.12	1.27	1.8	0.63	1.9	1.43338	0.0797773	1.46678		1.84	1.36	2.89	0.94	1.6	2.74791	0.0833361	2.76611		1.36	0.26	2.88	0.76	1.7	2.45141	0.129011	2.41033		1.69	0.53	1.38	0.83	1.4
1.38	2.32	3.7	0.59	2.3	1.64	0.085193	1.66659		2.61	0.344136	3.05	1.33	2.2	1.09239	0.0434558	1.12561		2.02	1.53	2.12	0.83	2	1.3116	0.0751813	1.252		1.59	1.75	1.68	0.79	1.7	2.74475	0.0728248	2.65443		1.39	0.47	1.52	1.13	1.8	2.30158	0.146541	2.19006		1.24	0.7	0.92	1.06	1.5
2.56	0.26	4.43	0.75	2.4	1.82	0.055023	1.89172		3.34	1.43039	2.6	0.65	2.3	1.33934	0.0598634	1.28779		1.88	1.33	2.45	0.9	2.1	1.06075	0.0506411	1.1095		1.9	2.21	1.59	1.15	1.8	2.33232	0.0643174	2.34809		1.34	1.28	2.33	1.09	1.9	1.83204	0.0998987	1.86584		1.66	0.81	0.96	0.9	1.6
3.97	1.32	2.65	0.74	2.5	2.14	0.057688	2.12536		2.89	0.469533	2.77	0.9	2.4	1.46072	0.0626371	1.47		1.41	1.36	2.66	1	2.2	0.986741	0.0365725	1.03207		1.4	0.15	2.11	1.52	1.9	1.9928	0.0695827	1.9412		1.43	0.7	2.53	0.39	2	1.44509	0.12461	1.49236		1.3	1.11	1.34	1.22	1.7
2.17	0.31	1.65	0.43	2.6	2.36	0.067217	2.3314		1.94	0.656923	2.17	0.92	2.5	1.62251	0.0629815	1.65884		2.04	2.36	2.4	0.8	2.3	1.09647	0.0396841	1.03639		0.84	0.97	2.33	1.13	2	1.41265	0.0442594	1.52652		2.12	2.16	1.26	0.78	2.1	1.19285	0.0768325	1.18588		1.1	1.85	0.98	0.64	1.8
3.37	1.55	1.54	1	2.7	2.6	0.073435	2.49368		2.91	0.568088	1.88	0.48	2.6	1.96342	0.076725	1.84837		1.39	0.14	2.58	0.75	2.4	1.08941	0.0377351	1.11962		1.29	1.24	1.58	0.78	2.1	1.19645	0.0635686	1.19862		1.51	0.58	2.22	0.98	2.2	0.945169	0.0312131	1.01549		1.55	1.71	1.49	0.98	1.9
2.45	0.4	2.24	1.27	2.8	2.46	0.063764	2.58968		2.85	0.313186	2.04	0.79	2.7	1.91901	0.0704324	2.04942		1.81	2.29	1.76	0.65	2.5	1.21508	0.0487511	1.24138		1.6	0.87	1.44	1.44	2.2	0.989374	0.0428386	0.999018		2.58	0.58	1.32	0.29	2.3	0.977212	0.0365362	0.966004		1.69	0.12	1.05	1.38	2
1.71	1.32	1.58	0.95	2.9	2.71	0.071323	2.59371		2.03	0.65015	2.53	0.61	2.8	2.28969	0.0909097	2.25379		2.16	1.12	2.13	0.82	2.6	1.45242	0.13563	1.37156		1.63	0.68	1.86	1.15	2.3	0.893278	0.0404953	0.906182		1.76	0.7	1.36	1.47	2.4	1.01402	0.0381612	0.989722		1.07	0.71	0.99	1.7	2.1
2.47	0.22	2.02	0.69	3	2.48	0.062553	2.50182		3.86	0.902626	1.85	2.38	2.9	2.39541	0.0890427	2.44138		2.14	1.41	1.62	0.99	2.7	1.48868	0.0720698	1.53101		1.55	0.18	2.62	1.27	2.4	0.92576	0.0625744	0.88008		1.12	0.87	2.83	0.77	2.5	1.09623	0.0429302	1.05918		1.28	0.89	1.34	1.1	2.2
2.1	0.51	2.69	0.83	3.1	2.42	0.070336	2.32963		1.76	1.43211	2.44	1.07	3	2.65655	0.0939164	2.60427		3.02	0.25	1.74	0.81	2.8	1.70991	0.0695155	1.72392		1.54	1.11	1.87	1.04	2.5	0.874229	0.0181061	0.892354		1.96	1.64	2.33	0.73	2.6	1.11503	0.0465749	1.14997		1.99	0.97	1.65	1.07	2.3
3.2	1.33	3.34	0.78	3.2	2.13	0.119419	2.09903		4.62	1.29251	1.76	1.12	3.1	2.75394	0.0998959	2.70571		2.5	1.65	1.69	0.88	2.9	1.85964	0.0972758	1.92179		0.98	2.02	2.14	0.57	2.6	0.936487	0.0263108	0.936607		2.07	1.17	2.17	0.71	2.7	1.27175	0.0521183	1.28581		1.19	0.78	0.91	0.77
2.51	0.87	2.1	1.09	3.3	1.74	0.05418	1.8326		2.2	2.21153	1.69	1.24	3.2	2.61303	0.0959545	2.71563		2.13	1.44	1.85	0.31	3	2.2321	0.193351	2.09299		1.28	0.44	1.5	0.9	2.7	1.04359	0.0424646	1.04367		1.42	0.96	3.04	0.73	2.8	1.42809	0.164717	1.45407		1.83	0.92	1.28	1.18
3.86	1.17	3.95	0.66	3.4	1.55	0.081415	1.55896		2.76	0.376903	2.3	1	3.3	2.8307	0.139947	2.64351		1.79	0.68	2.02	1.07	3.1	2.23199	0.118217	2.23433		1.83	2.05	2.42	1.28	2.8	1.09182	0.0439258	1.14689		2.3	0.48	1.44	1.46	2.9	1.62404	0.0929822	1.58223		2.32	0.84	1.11	1.58
2.81	0.29	3.52	0.83	3.5	1.29	0.091639	1.31403		3.09	0.157004	2.68	1.23	3.4	2.3792	0.105835	2.48964		2.44	0.41	1.78	1.1	3.2	2.33569	0.116306	2.35105		1.24	0.61	1.51	1.23	2.9	1.35377	0.120501	1.2474		2.78	0.85	2.05	0.64	3	1.87261	0.376521	1.70309		1.68	1.33	1.38	0.78
2.57	0.41	3.61	1.12	3.6	1.1	0.041874	1.11572		3.8	0.892692	2.76	0.77	3.5	2.23216	0.0998267	2.26467		3.16	0.55	2.76	0.77	3.3	2.42112	0.117034	2.44095		2.72	0.98	2.49	0.74	3	1.49474	0.141384	1.35036		1.27	1.11	1.25	0.86	3.1	1.60729	0.088229	1.81635		1.82	0.31	1.93	0.68
2.25	1.3	1.91	0.82	3.7	0.94	0.029755	0.968754		4.32	1.67032	2.54	0.84	3.6	2.17271	0.171404	2.01648		2.29	0.9	2.29	1.29	3.4	2.51408	0.156931	2.50329		1.15	1.2	2.89	1.01	3.1	1.32722	0.0861511	1.45293		2.2	3.5	1.47	0.65	3.2	1.97094	0.120946	1.91755		2.22	1.84	1.15	0.53
2.99	0.3	2.93	1.35	3.8	0.89	0.027466	0.86543		3.55	1.36653	2.45	0.99	3.7	1.60197	0.0861235	1.79187		1.54	0.26	1.82	0.83						1.99	1.31	1.86	1.07						2.17	0.94	1.83	0.28	3.3	2.0189	0.14695	2.00769		2.05	1.37	1.08	0.77
2.49	0.11	2.05	1.19	3.9	0.8	0.022743	0.799025		3	0.3291	4.26	0.78	3.8	1.48229	0.0821617	1.56685		2.53	1.7	2.46	1.04						2.01	0.16	1.61	0.91						2.75	0.36	1.63	0.28						1.78	0.61	0.98	1.05
3.3	1.69	2.16	1.36	4	0.76	0.029662	0.749861		3.28	0.263199	3.37	0.68	3.9	1.27517	0.077039	1.33978		2.6	0.31	1.74	0.96						1.16	0.31	1.29	0.77						2.16	2.1	2	0.97						1.32	1.23	1.65	0.85
4.25	1.48	1.92	0.97	4.1	0.75	0.0194	0.719714		3.98	1.17361	2.32	1.35	4	1.2133	0.0840726	1.11362		1.85	0.99	1.28	0.87						1.54	0.71	2.82	1.15						1.75	0.85	2.7	0.57						1.96	1.81	1.37	0.87
2.39	0.76	4.04	0.7	4.2	0.72	0.019399	0.710603		2.31	1.12367	1.95	0.73	4.1	0.893485	0.0422132	0.891259		2.61	1.01	2.15	1.04						1.15	1.72	1.66	0.87						1.82	2.32	2.19	0.91						2.05	1.15	1.85	0.74
2.15	0.26	3.06	0.98	4.3	0.81	0.032551	0.722668		3.44	0.456924	3.31	1.12						2.63	0.34	2	1.38						1.08	0.24	2.98	1.23						1.46	2.68	1.74	0.91						1.46	2.64	0.96	1.43
5.43	0.54	2.94	1.09	4.4	0.74	0.023483	0.755355		3.63	0.157369	2.63	0.94						1.98	1.56	2.25	1.26						1.91	1.3	2.19	0.59						1.68	0.92	1.22	0.68						1.64	0.7	1.11	1.24
4.46	1.09	3.22	1.21	4.5	0.76	0.021129	0.807689		2.53	0.183348	3.05	0.77						2.56	0.76	1.64	1.64						1.34	0.27	2.29	0.48						1.65	0.72	1.41	0.5						1.41	0.62	1.11	2.05
2.49	0.21	2.73	1.33						3.47	0.867595	3.72	0.7						1.51	0.15	2.78	0.67						1.77	0.7	2.17	0.85						2.05	1.76	2.4	0.6						1.53	1.03	1.02	0.67
3.35	1.75	3.77	0.56						1.58	1.03053	1.97	1.37						2	0.98	2.78	0.79						1.64	0.37	2.15	1.31						2.24	1.47	1.57	2.13						0.91	0.58	0.93	0.8
2.44	0.24	3.57	1.04						5.48	0.707186	1.94	1.19						2.63	2.6	1.19	0.96						2.25	1.98	1.74	1.87						2.29	1.4	1.75	1.58						1.59	0.24	1.74	2.38
3.74	0.64	2.31	0.85						2.62	0.190791	2.93	1.09						3.41	0.22	2.6	1.32						1.56	0.93	2.11	1.04						2.26	0.99	1.49	1.39						1.57	1.18	1.45	0.89
4.18	1.87	3.7	1.86						2.22	1.89288	2.34	0.9						2.8	0.59	2.23	0.6						1.67	0.28	2.61	1.11						3.2	0.35	1.99	0.6						1.89	0.31	1.47	0.74
4.06	2.01	2.07	0.79						2.99	0.42286	3.89	0.89						2.96	0.12	2.28	1.09						2.22	1.16	1.34	0.94						2.29	2.08	2	0.69						1.19	2.29	1.29	1.01
2.88	0.34	2.12	0.88						4.82	1.11192	3.61	1.05						3.43	0.6	1.92	0.71						1.53	1.39	2.78	0.83						1.8	1.73	1.85	0.38						2.12	1.46	1.57	1.41
2.91	0.43	2.11	0.66						2.96	0.67979	4.17	0.68						2.04	0.14	3.39	1.09						1.54	0.52	2.64	0.68						2.01	1.3	2.62	2.85						1.33	0.89	1.24	1.59
4.74	0.91	3.89	0.89						1.72	0.199945	1.96	0.57						2.17	1.41	2.27	1.69						1.92	1.23	2.32	1.4						3.2	0.81	1.64	0.54						1.59	0.25	1.58	0.91
4.98	0.31	1.9	0.6						4.79	1.17954	2.76	0.92						2.66	1.15	1.69	0.82						1.92	0.46	2.3	0.53						1.47	1.71	3.02	0.5						1.63	0.38	1.37	1.63
2.4	1.14	2.7	1.46						3.96	0.275602	1.41	0.84						3.25	0.54	2.83	0.65						1.14	1.75	1.39	1.31						1.46	1.11	2.11	0.76						1.79	1.14	1.1	2.3
4.91	1.45	2.99	1.72						2.46	1.17485	2.53	0.65						3.19	0.2	3.02	1.36						2.36	1.82	2.47	0.87						2.48	1.27	2.68	0.58						1.26	1.47	1.02	0.8
3.51	0.36	2.35	0.73						3.84	1.31606	2.74	0.87						2.94	0.59	2.41	1.93						2.69	1.25	2.69	0.91						3.57	1	1.1	1.07						1.51	0.21	1.79	0.76
3.94	1.28	2.76	1.97						2.37	1.10925	3.68	0.75						1.46	0.13	1.28	0.91						1.67	1.37	2.88	0.74						3.09	1.4	2.55	1.02						1.5	0.4	1.02	0.58
3.34	1.15	3.67	1.18						2.89	1.32221	2.75	0.91						3.71	0.13	2.14	0.98						2.44	1.34	2.35	0.6						2.44	1.28	1.9	0.7						1.55	1.52	1.57	1.27
4.74	1.23	3.77	0.61						4.14	1.66904	2.86	1.02						3.03	1.28	2.31	0.81						1.87	1.57	2.11	0.86						2.32	0.99	2.41	1.01						1.78	0.95	1.76	0.63
5.13	1.21	3.39	0.49						3.66	1.61031	2.09	1.19						2.62	1.33	3.97	0.61						2.97	0.89	2.32	0.87						3.01	0.57	2.75	2.06						1.27	1.25	2	0.68
3.55	1.27	3.28	1.37						3.3	0.61806	3.35	1.38						2.85	0.49	2.51	0.77						0.97	1.26	2.37	1.01						2.87	1.01	2.48	0.63						1.22	1.3	1.35	0.88
5.9	0.18	2.42	1.31						1.99	0.33792	3.28	0.84						3.6	0.23	2.41	0.8						1.27	1.06	2.24	0.98						1.61	1.67	2.14	1.08						1.53	0.25	1.73	0.77
3.14	0.49	4.14	0.53						2.74	0.555298	2.6	1.06						1.68	0.43	2.36	1.39						1.39	0.85	2.6	0.68						3.37	0.5	1.93	1.16						2.13	1.84	2.41	0.66
5.21	1.28	5.3	0.88						3.56	0.248422	2.52	0.97						1.77	0.42	1.36	0.84						2.02	0.46	1.48	0.61						3.11	0.53	1.72	1.35						1.73	0.85	1.75	1.06
2.83	0.54	2.45	0.57						2.7	2.51213	2.51	2.27						2.24	0.87	1.73	0.86						1.86	0.31	1.66	0.84						3.32	0.77	2.65	0.64						1.16	0.94	1.39	1.67
2.6	0.61	2.46	0.69						4.15	0.385889	2.65	1.23						1.92	0.23	2.62	0.71						1.42	1.1	1.46	1.69						2.49	1.31	1.37	1.39						1.67	0.98	1.53	1.23
3.33	0.73	3.04	1.34						3.15	0.474075	3.39	1.2						3.01	1.07	2.47	1.09						1.94	0.36	1.14	1.54						2.07	0.97	1.35	0.39						1.93	0.92	1.36	1.37
3.48	0.26	3.3	1.13						2.7	1.35125	3.07	0.92						3.28	1.05	2.15	1.33						1.97	0.44	1.29	1.21						1.59	1.19	2.48	0.83						1.69	1.15	1.33	0.72
3.46	1.19	3.45	1.45						2.27	0.345834	2.34	1.34						2.91	0.92	1.38	1.04						1.98	1.33	2.02	0.79						1.57	1.71	1.37	0.56						1.18	1.07	1.07	0.61
2.67	1.26	3.05	0.89						1.55	2.92869	1.84	1.11						2.76	1.58	1.89	1.02						1.78	0.09	1.98	1.13						1.51	1.14	2.42	0.68						1.52	0.14	1.01	0.62
3.85	1.04	1.81	1.34						2.1	2.03331	3.13	0.77						1.59	1.39	1.78	1.03						1.48	1.3	1.99	0.9						1.77	0.85	1.86	0.68						1.7	0.41	2.31	0.54
2.33	1.11	3.54	0.88						1.76	0.835657	3.22	1.19						1.7	1.24	2.1	1.27						1.87	1.25	1.2	0.78						1.32	0.4	2.35	0.63						1.09	1.8	1.1	1.42
2.89	0.4	1.87	0.76						3.97	1.79615	2.3	1.16						2.29	0.21	2.13	1						1.6	0.18	1.34	1.39						2.82	0.29	3.07	0.67						1.05	0.93	0.84	0.95
2.72	1.04	2.94	1.1						2.31	0.200407	2.08	0.69						1.81	1.53	1.96	0.99						4.2	1.94	1.55	0.5						1.36	0.23	2.8	0.89						4.07	0.6	1.78	0.57
2.61	1.9	3.86	0.78						1.93	1.4618	2.17	1.39						2.49	0.69	1.46	0.72						1.98	0.29	1.52	1.99						3.36	1.47	2.75	1.12						1.38	0.14	0.82	0.73
2.77	1.18	2.71	0.38						2.69	1.68579	3.19	0.94						2.46	0.83	2.22	0.18						1.95	1.45	1.27	0.53						2.3	1.19	1.52	1						1.38	0.87	0.97	0.81
3.31	1.41	4.11	1.13						2.55	0.211411	2.53	0.87						2.23	1.21	2.17	1.49						2	0.27	1.28	1.8						1.28	0.41	1.89	0.58						1.51	0.95	1.08	1.07
2.7	0.39	4.97	0.96						1.5	0.152226	4.3	0.96						1.55	1.01	1.46	2.12						4.1	0.12	1.34	0.45						1.88	1.4	2.03	0.98						1.95	0.24	1.2	0.81
2.95	0.28	3.29	1.07						3.41	2.15951	2.84	0.94						1.71	1.55	3.65	0.95						1.92	0.27	2.1	0.9						1.55	1.15	3.8	0.93						1.38	1.04	1.03	1.04
2.08	0.31	4.46	0.83						2.43	1.09593	3.09	1.08						2.32	0.77	2.68	0.8						1.43	0.86	1.36	0.8						0.99	0.98	2.44	1.06						1.19	0.61	1.56	0.98
2.08	0.98	2.67	1.36						2.26	1.49352	2.82	0.75						1.79	2.26	2.77	1.29						1.43	0.76	1.42	0.81						2.39	1.12	2.35	0.51						1.09	1.28	1.68	0.55
3.58	2.03	2.95	0.96						2.5	0.741882	2.52	1.93						1.56	0.2	1.86	1.33						3.16	0.97	1.27	1.44						3.89	0.82	1.39	0.58						1.23	0.71	1.05	0.94
1.98	1.32	5.72	0.77						1.73	1.16607	3.16	0.86						1.88	1.02	1.48	0.92						3.15	0.94	1.41	1.29						1.9	1.14	2.51	1.06						1.43	1.18	1.72	1.23
2.3	0.25	2.95	1.87						2.46	0.790447	2.79	0.69						1.33	1.39	2.61	0.96						1.75	0.31	1.74	0.61						3.31	0.31	1.85	0.8						1.88	1.5	1.33	1.11
2.91	0.77	2.43	0.56						2.82	0.196689	2.05	0.74						2.94	0.34	1.56	0.42						2.63	1.29	1.38	0.91						2.67	1.05	1.98	0.49						1.56	1.11	3.06	0.42
3.28	0.77	3.97	0.86						2.77	1.12522	3.53	1.37						2.56	0.2	2.8	0.91						1.56	0.73	2.42	1.27						2.39	0.84	2.45	0.76						1.07	2.05	1.1	1.18
1.72	1.38	2.38	0.77						2.89	0.410144	2.35	1.18						2.14	1.12	1.92	0.33						2.16	1.11	1.33	0.64						2.35	1.31	1.8	1.37						1.06	1.57	1.85	1.27
2.62	0.99	3.66	1.2						5.19	0.962617	2.22	1.08						2.98	1.99	2.09	1.22						1.65	0.69	1.7	0.63						3.45	0.25	2.19	0.53						1.13	0.8	2.17	0.55
2.76	0.36	3.02	1.23						2.19	3.00047	1.76	0.45						2.32	0.74	1.61	1.1						1.93	0.36	2.6	0.58						2.41	1.13	2.05	0.55						1.14	1.96	1.82	0.99
1.81	0.76	4.17	0.88						2.26	1.58716	2.87	1						1.06	0.76	2.31	1.42						2.06	0.08	2.45	0.6						2.35	1.44	1.49	1.63						0.99	0.7	0.91	1.63
1.6	2.3	2.97	1.6						1.85	1.96807	2.15	0.57						2.05	1.78	2.49	0.87						2.32	1.94	1.85	1.43						2.89	0.91	1.79	0.56						1.63	0.61	1.32	0.65
3.1	1.33	2.86	1.08						1.85	0.489417	2.69	0.95						2.87	0.12	2.29	1.47						2.72	0.83	1.92	0.62						1.84	2.13	1.89	0.56						1.26	0.97	1.03	0.19
3.92	1.1	3.84	0.86						2.17	1.99768	3.01	1.08						1.42	0.24	2.27	0.99						1.96	1.35	2.44	0.77						2.46	1.19	2.25	1.72						1.64	0.16	1.99	1.3
2.99	1.57	2.45	1						3.88	1.73489	2.5	0.86						3.17	0.4	1.82	0.78						1.78	0.28	2.52	0.85						2.76	1.39	1.52	1.34						1.91	1.11	1.27	1.39
3.67	1.36	1.83	0.69						3.5	1.60975	2.21	0.91						1.72	1	1.19	1.23						2.43	1.06	2.77	1.1						2.93	0.64	2.59	0.92						1.65	0.98	1.05	0.91
1.83	2.38	4.26	0.87						3.28	1.41516	3.08	0.64						2.04	1.07	1.97	0.62						1.73	0.17	1.61	0.59						1.77	0.74	2.16	0.7						2.14	1.95	1.59	0.84
2.68	0.22	2.66	1.06						1.87	2.50249	3.52	0.66						3.6	0.69	2.91	0.85						2.05	1.19	1.43	0.82						3.19	0.94	2.61	0.36						1.03	1.22	0.88	0.33
3.39	1.87	2.43	0.96						3.16	0.755809	1.45	0.68						2.58	0.67	1.56	1.05						2.99	1.55	2.43	1.55						2.43	1.94	5.53	1.06						1.2	2.19	1.58	1.07
2.95	0.98	2.35	1.53						3.82	1.17771	1.86	0.78						2.2	1.06	2.35	1.03						1.16	0.58	2.26	0.78						1.87	0.69	2.62	0.69						1.58	1.1	1.65	0.74
2.12	1.09	2.57	0.8						3.81	0.368533	1.84	1.32						1.68	0.5	2.48	0.89						2.55	1.19	1.84	1.48						1.48	1.33	1.82	1.75						1.37	0.57	1.48	0.75
3.48	1.55	4.62	1.13						2.28	0.998963	2.6	0.91						2.73	0.83	1.62	1.06						1.48	1.29	1.93	0.9						2.75	0.63	2.36	0.77						1.75	0.46	1.19	0.7
4.92	0.51	1.82	1.12						2.17	1.52569	3.37	0.75						2.2	0.89	2.12	0.85						1.15	0.65	3.1	1.2						2.4	0.19	1.86	0.59						0.96	0.94	1.45	0.61
2.63	1.29	2.31	0.65						2.19	1.21552	2.26	0.8						2.01	1.61	1.97	0.72						3.55	0.29	2.98	1.12						2.38	1.78	1.45	0.44						1.34	1.14	1.29	1.2
2.97	1.08	2.84	0.96						3.94	2.06542	2.57	0.82						2.03	1.67	1.88	1.15						2.05	1.1	1.81	1.23						5.6	1.34	1.7	1.46						1.57	0.46	1.17	0.97
2.84	0.34	2.76	0.9						2.18	1.33536	2.49	1.06						1.84	0.54	2.35	0.46						1.47	1.18	2.88	1.06						2.55	1.1	1.75	0.53						2.04	1.41	1.11	1.01
3.13	0.31	4.45	0.66						2.94	0.794493	3.34	2.79						2.7	0.81	2.52	0.54						2.72	0.98	3.22	1.34						1.48	0.39	2.56	0.62						1.63	0.16	1.15	0.91
2.08	0.36	3.07	1.74						4.32	1.54065	1.99	1.01						2.81	1.24	2.22	0.69						3.63	0.23	3.13	1.17						3.24	0.92	1.56	0.69						1.49	0.74	1.83	0.62
2.91	0.21	2.75	1.49						2.87	0.447608	2.09	1.18						2.53	1.87	2.41	0.95						2.07	0.53	3.29	1.32						2.05	1.08	1.51	1.22						1.08	1.27	1.02	0.61
2.64	0.33	3.06	0.97						2.88	0.803818	2.53	1.86						1.56	0.15	3.36	0.97						2.13	1.2	1.14	0.69						1.71	2.04	1.89	0.86						1.55	0.79	1.1	0.78
1.76	1.41	3.64	0.93						3.69	2.12484	1.94	0.96						3.27	0.56	2	1.05						1.23	1.22	1.96	1.48						2.87	0.92	4.21	0.69						1.38	1.37	1.11	1.14
3.85	2.04	1.94	1.25						3.94	0.48117	3.23	0.78						2.23	0.53	2.85	0.71						2.17	1.45	2.23	0.68						2.57	1.15	2.16	0.95						1.3	0.99	1.46	1.17
4.15	1.23	1.98	0.93						2.78	0.891846	2.14	0.65						2.09	2.14	1.92	1.34						1.16	0.34	2.93	0.77						2.3	1.57	2.37	0.68						1.42	1.1	1.16	0.74
3.55	0.85	2.27	0.57						3.68	0.622189	2.45	0.81						2.65	0.7	2.93	1.15						2.11	0.89	2.87	0.61						1.56	1.02	1.81	1.71						1.34	1.45	1.57	1.12
2.02	2.32	3.31	0.64						1.56	2.25999	3.19	0.97						2.73	0.7	1.93	1						2.6	0.65	2.41	0.78						2.9	1.37	2.31	0.72						1.08	1.07	1.39	0.78
4.69	1.31	2.6	1.37						1.84	0.809235	2.78	0.96						2.77	1.29	1.52	0.82						1.81	0.19	1.95	1.07						3.24	1.46	2.67	0.72						1.39	0.92	1.69	2.28
2.69	0.77	4.09	1.32						1.74	0.893363	2.2	0.79						1.9	2.17	2.09	1.25						2.13	1.89	2.51	1.14						3.24	0.83	1.66	1.53						1.58	0.44	1.15	1.7
2.36	1.23	1.6	1.44						1.72	2.16159	3.42	0.85						1.14	0.48	1.63	0.78						1.96	0.22	2.47	0.93						1.58	1.77	1.58	1.29						1.37	1.25	0.68	1.21
2.06	0.61	3.23	1.18						3.34	1.49412	2.2	0.91						1.62	1.24	2.55	1.25						2.19	0.61	2.54	0.7						2.16	0.72	1.58	1.37						1.75	0.29	1.56	1.24
2.22	0.92	3.98	0.76						2.7	0.247432	2.9	0.93						3.04	0.38	1.29	1.46						2.64	1.56	2.04	1.34						1.39	0.34	1.83	0.51						1.99	1.31	1.48	0.4
1.97	2.78	2.79	1.15						3.68	1.48349	2.26	1.08						1.64	0.94	1.72	1.03						1.33	1.02	2.2	1.04						2.95	0.68	3.29	0.58						2.12	1.91	1.55	1.65
3.76	0.47	4.61	0.77						3.22	0.41986	3.21	1.05						1.69	1.21	2.26	1.17						1.55	0.26	1.5	0.92						2.74	1.34	2.14	0.67						1.02	0.75	1.81	0.69
2.79	1.19	3.13	0.64						2.04	1.529	2.59	1.52						1.45	0.54	2.41	1.04						4.99	0.64	2.43	1.44						1.59	0.72	2.39	0.65						1.03	0.77	1	1.59
4.86	1.17	1.86	0.71						2.12	1.97692	1.99	1.09						2.51	1.34	2.23	0.71						1.57	1.3	2.43	1.13						1.87	0.8	2.29	0.6						1.32	0.52	1.37	0.47
2.73	0.28	2.1	0.75						2.48	1.22509	3.32	0.94						1.55	0.73	1.92	0.7						1.96	1.27	1.93	0.47						1.66	2.07	1.51	1.84						1.09	1.25	0.88	0.65
4.74	1.41	2.59	1.47						2.61	0.2262	2.04	0.97						2.97	0.27	2.09	0.74						1.61	1.68	2.31	0.66						1.01	1.46	1.52	1.09						1.84	0.89	1.47	0.94
5.46	0.42	3.34	0.96						2.31	1.12327	2.14	1.26						1.82	1.44	2.18	1.18						1.39	0.64	1.2	0.87						2.29	1.79	1.92	1.2						1.82	0.62	1.52	1.05
3.68	0.4	3.72	1.51						2.67	0.403286	2.99	1.04						2.52	1.37	1.62	1.21						1.43	0.56	1.41	1.4						1.05	2	2.28	0.71						2.14	0.74	1.49	1.26
3.36	0.21	2.29	0.91						1.91	1.58466	2.35	0.95						1.76	2.23	2	1.43						1.99	1.08	1.58	1.29						2.01	0.62	1.52	0.6						1.02	1.81	1.24	0.68
2.88	0.45	2.82	1.51						3.53	0.839852	1.97	0.61						2.8	0.28	2.2	0.91						3.07	1.33	1.69	0.8						1.14	1.72	2.45	1.3						1.45	1.11	2.21	0.66
5.27	0.85	4.48	1.54						3.44	0.316841	3.03	1.6						2.96	0.28	1.92	0.88						2.52	0.77	1.74	0.99						1.95	0.89	1.47	0.91						1.41	0.94	1.2	1.04
2.52	0.95	2.47	1						2.39	1.31273	2.63	1.11						1.74	1.5	2.32	0.84						1.52	0.54	1.93	1.43						1.21	0.26	1.54	1.18						1.74	0.18	1.1	1.67
3.04	1.17	4.77	0.82						1.82	1.03639	2.01	0.58						2.29	0.92	2.78	1.28						1.87	0.81	2.81	1.05						1.72	1.46	1.67	1.15						1.21	0.83	1.73	0.85
2.86	1.16	3.5	0.97						2.63	1.40193	2.5	1.1						2.88	0.2	2.85	1.01						1.84	0.97	1.96	1.01						2.29	1.63	2.27	1.01						1.23	1.93	1.49	0.83
3.41	1.15	2.23	0.41						4.41	1.78591	2.31	1.09						1.58	0.28	1.63	0.89						2	0.95	3.12	1.6						1.7	0.68	2.1	0.57						1.27	0.96	1.06	1.03
2.75	1.05	5.04	1.15						3.08	0.257185	3.74	1.05						2.88	0.12	2.49	0.96						2	1.25	2.16	1.14						1.99	1.39	1.8	0.61						1.62	1.13	0.87	0.56
4.03	1.11	3.8	0.81						4.03	1.49324	2.34	0.74						3.45	0.5	1.98	0.84						3.62	0.27	2.36	1.14						1.4	1.66	1.84	1.04						1.78	0.17	1.25	1.78
4.44	1.18	4.63	0.9						2.79	0.788959	2.16	0.8						3.57	0.24	2.58	1.22						1.9	0.82	3.07	1.23						1.7	0.26	2.41	0.63						1.79	0.65	1.58	0.97
3.17	0.77	4.3	1.05						3.63	0.873326	2.94	0.46						2.19	1.8	2.01	0.98						1.37	0.59	1.79	0.93						2.24	1.04	2.57	1.1						1.66	1.04	1.21	0.8
2.27	1.23	3.08	0.85						3.02	0.253124	1.76	1.05						2.07	1.27	2.41	1.17						2.09	1.85	2.59	1.15						1.94	0.2	1.57	0.63						1.01	0.27	1.05	1.51
3.71	0.69	4.52	0.54						2.28	2.00847	3.13	1.12						1.74	0.33	1.89	0.63						2.13	1.21	2.02	0.41						1.9	0.98	2.78	0.7						2.32	1.3	1.04	0.79
3.12	0.53	4.16	1.04						2.84	1.40476	3.14	0.94						3.13	0.94	2.68	1.37						2	1.43	1.72	1.14						2.57	1.22	1.47	2.13						1.77	0.6	1.1	1.18
3.35	1.19	3.44	1.73						2.51	1.01709	1.94	0.66						2.78	1.12	1.69	0.73						1.65	0.1	2.25	1.17						2.35	0.98	2.23	0.89						1.85	2.03	1.86	0.83
2.1	0.27	2.2	0.73						2.83	0.572352	2.46	0.85						2.21	1.36	1.8	0.38						1.73	1.34	2.11	1						1.4	0.6	2.85	1.62						1.45	1.16	1.38	1.24
2.21	0.28	3.58	1.06						3.34	0.376543	2.56	0.78						3.17	0.3	1.64	0.89						1.15	1.16	2.79	1.1						2.1	1.31	2.68	0.8						1.63	0.28	1.04	0.92
3.05	1.98	2.68	0.66						1.91	1.56943	2.19	1.11						1.91	0.55	2.3	0.96						2.23	1.38	2.5	1.33						1.95	0.92	1.39	1.58						1.58	0.07	0.99	0.83
2.2	0.25	4.14	1.66						3.36	0.604722	1.85	0.97						1.57	0.07	2.13	1.14						1.48	0.27	1.6	0.25						2.46	2.32	3.13	0.59						1.45	1.03	1.3	0.96
3.52	1.74	3.26	1.1						3.46	0.265299	2.3	1.28						2.21	1.78	1.53	1.36						1.6	0.21	1.88	0.77						2.29	0.72	2	1.15						1.24	1.3	1.22	2.54
1.47	1.73	5.04	0.83						2.3	1.12466	3.34	0.63						2.84	0.92	2.74	1.04						1.83	0.22	2.07	0.75						1.11	1.83	1.58	1.22						1.6	2.22	1.03	1.79
3.36	1.27	3.19	1.56						2.43	1.53691	3.76	0.85						2.94	0.88	1.67	0.89						1.81	0.59	2.2	0.94						1.79	0.22	3.08	1.91						2.3	1.62	1.31	0.84
2.44	0.41	2.9	1.22						4.86	0.986846	2.62	1.03						3.74	0.41	1.6	0.77						2.45	1.44	1.74	1.12						2.98	0.98	1.93	0.74						1.91	0.87	1.85	1.24
2.21	1.26	3.69	0.82						3.88	0.246703	2.66	1.51						2.74	0.22	2.24	0.92						2.7	0.7	1.1	1.26						2.29	1.2	2.06	0.62						1.46	1.27	1.69	1.12
1.7	1.49	1.91	0.98						2.66	0.75549	2.11	0.67						2.55	1.16	1.77	0.68						2.35	1.66	1.29	1.17						2.29	1.24	2.34	1.12						2.08	1.29	1.3	0.84
3.25	1.38	1.82	0.83						3.43	0.228692	2.15	1.2						3.48	0.27	2.23	0.66						1.83	0.36	6.72	0.83						1.63	1.01	3.26	1.03						1.99	1.07	1.43	1.34
4.52	0.32	1.8	0.96						2.85	0.427131	2.82	1.66						2.49	1.23	2.13	0.86						2.42	1.43	1.86	0.61						1.86	1.19	3	1.92						1.83	0.36	1.13	1.55
3.21	2.29	4.25	0.6						2.5	1.01966	2.25	1						2.31	1.42	1.95	0.98						2	0.22	1.54	1.48						1.73	0.24	1.39	2.24						2.11	1.29	1.85	1.89
3.6	1.32	2.64	1.18						5.22	1.19747	2.22	0.79						2.32	1.29	2.28	1						3.25	0.26	2.9	0.92						2.52	0.54	2.38	0.55						1.05	0.71	1.39	0.53
1.9	0.98	1.89	0.76						2.23	1.36881	3.1	2.3						4.33	1.81	1.56	1.43						1.63	1.05	2.34	1.06						3.16	0.46	1.98	0.64						1.36	0.82	2.25	0.7
1.75	0.56	1.58	0.9						2.85	0.78818	2.78	0.97						2.43	1.7	2.58	1.56						2.27	1.38	1.7	0.86						1.98	1.08	2.44	1.33						2.26	1.27	1.83	0.56
3.53	1.38	2.93	1.04						2.94	1.29501	4	1.05						2.68	1.88	2.91	1.1						2.92	1.25	3.04	1.03						7.79	1.66	2.61	0.51						1.12	0.72	1.33	0.99
2.49	0.66	2.72	1.37						1.05	1.37004	2	0.95						2.91	1.06	1.48	0.88						1.53	1.04	2.59	0.67						2.98	0.21	1.5	0.48						1.69	0.19	1.11	0.65
3.52	0.75	2.15	0.88						2.62	0.234896	2.57	0.72						2.51	1.15	2.08	0.87						1.67	0.38	2.74	0.76						2.39	0.79	2.27	0.57						2.14	1.06	1.32	0.36
2.87	0.71	2.54	0.94						2.7	0.782373	2.67	0.6						3.07	0.69	2.81	0.74						2.33	1.36	2.57	1.11						2.62	0.68	1.88	1.53						1.65	1.15	1.72	0.72
3.05	0.19	2.11	1.14						2.09	0.556941	2.64	0.97						2.34	1.07	1.98	0.71						1.42	0.93	3.61	1.01						3.12	0.73	2.96	1.32						2.63	1.24	1.49	1.32
3.58	1.64	3.28	0.6						2.08	0.9036	2.45	1.53						6.7	1.22	2.15	0.85						3.27	0.39	2.8	1.02						2.09	1.2	1.54	0.74						1.23	1.36	1.24	0.91
3.19	0.71	2.8	1.14						2.61	0.330835	2.26	0.92						2.57	1.42	1.79	1.24						2.69	1.39	1.92	1.15						2.4	1.03	4.76	0.67						1.23	0.57	1.18	0.86
3.92	2.11	3.4	1.61						3.15	2.26867	3.48	1.13						1.67	0.12	2.15	0.7						3.26	0.63	1.76	0.73						2.98	0.79	1.86	1.07						1.55	1.49	1.74	0.63
2.8	1.71	3.19	0.63						4.08	1.52261	2.65	1.68						1.49	0.13	1.91	0.91						2.77	2.04	2.47	0.6						2.85	1.19	1.21	1.08						1.89	0.84	1.77	1.27
4.18	1.57	1.64	1.06						5.48	0.660964	2.3	0.9						1.82	0.86	1.99	0.46						1.66	0.19	2.85	0.86						1.67	0.23	2.63	0.46						0.93	0.61	1.37	0.95
3.29	0.17	3.06	1.02						4.56	0.986133	2.2	1.24						1.93	0.27	3.83	0.79						6.33	1.19	1.84	0.55						2.1	1.33	2	1.72						1.76	0.87	1.8	1.3
3.51	1.23	1.67	0.72						1.66	1.96984	3.38	1.29						1.92	1.43	1.95	0.5						1.91	0.79	2.76	0.85						2.31	0.95	2.62	2.44						1.24	1.15	1.26	0.72
3.18	0.9	2.75	0.94						3.05	0.832946	2.47	0.81						2.32	1.33	2.69	1.19						2.09	1.97	1.64	1.18						1.56	0.51	1.75	0.95						1.65	0.27	1.33	0.83
3.89	1.39	2.1	0.77						2.08	0.382718	2.98	0.76						3.26	0.36	1.37	1.02						1.22	0.74	1.61	0.71						2.51	1.53	2.19	0.83						1.41	1.47	1.8	0.77
2.56	1.04	1.86	0.85						1.96	1.47648	2.82	0.77						2.74	1.8	2.35	0.88						2.24	0.94	1.62	1.75						2.48	1	2.92	1.36						1.12	1.53	0.83	0.84
3.42	1.56	3.1	0.81						3.07	0.163708	2.77	1.03						2.34	0.85	2	0.7						1.87	0.35	2.74	1.18						2.01	0.28	1.35	0.55						2.17	1.64	1.71	0.49
3.46	1.57	4.63	0.97						2.27	1.63004	2.45	1.19						2.06	0.45	2.46	0.81						2.8	1.26	1.94	0.73						3.2	2.36	1.9	0.5						1.51	0.21	1.79	0.62
3.51	1.38	4.27	0.71						2.91	0.429163	1.71	0.84						1.36	1.79	2.84	0.93						2.43	1.73	2.59	1.12						3.02	1.03	1.5	0.65						1.61	0.56	2.12	0.8
2.81	0.31	2.13	1.11						4.95	1.38137	2.29	0.84						2.1	0.2	1.88	1.14						2.56	1.62	2.19	0.73						3.49	0.66	1.56	0.94						1.78	0.51	0.94	0.94
3.84	0.93	3.45	0.8						2.65	1.24713	1.72	0.76						1.25	1.46	1.66	1.09						1.7	0.11	1.51	1.57						2.95	0.63	1.06	0.9						1.6	0.86	1.68	1.06
3.07	0.15	3.41	1.15						2.51	0.21336	3.34	1.32						1.16	0.99	1.98	0.56						2.01	1.12	1.7	1.24						2.39	1.38	2.21	1.3						1.65	1.22	0.97	1
3.56	1.24	1.96	1.2						3.16	0.566908	2.21	0.95						2.28	1.32	2.08	1.19						2.18	0.35	1.43	1.28						2.2	1.09	1.62	1.04						1.45	0.18	0.92	0.88
2.12	1.21	2.92	1.04						2.92	0.200565	2.39	0.97						1.54	0.21	2.65	0.84						2.32	1.25	2.19	1						1.67	1.52	3.42	0.98						1.34	1.1	0.95	1.09
2.45	1.02	3.61	1.23						2.71	0.825111	2.46	1.01						2.18	0.65	2.47	0.76						2.71	1.09	2.51	1.24						1.26	1.86	1.8	0.65						1.92	1.65	1.4	1.44
2.2	0.55	2.29	0.9						3.81	0.881512	2.66	0.93						2.61	0.56	2.14	0.61						2.32	1.25	1.77	0.94						2.39	1.22	1.43	0.88						1.7	0.35	1.12	1.09
3.85	0.73	2.44	0.63						2.28	0.698451	2.49	1.01						1.78	1.45	2.46	0.76						2.87	0.3	2.39	1.02						1.33	0.64	1.96	1.02						2	1.04	1.2	1.21
2.11	1.1	2.69	1.65						2.56	2.53706	1.7	1.06						1.45	0.18	1.84	1.06						2.55	1.27	2.32	1.37						2.59	1.13	2.82	0.88						1.09	0.72	1.9	0.73
2.53	0.99	3.65	1.14						4.38	1.17705	3.23	0.77						1.38	0.44	2.38	1.06						2.05	1.54	1.59	1.45						2.24	1.25	1.75	0.73						1.3	0.65	1.68	0.44
2.55	0.59	4.28	1.49						2.57	2.02782	2.53	0.99						2.2	1.4	2.09	1.08						2.08	0.99	1.9	1.05						2	1.11	3.48	0.7						2.03	0.12	1.01	0.73
2.93	0.23	3.12	0.92						3.08	0.349353	2.04	0.93						2.37	1.48	2.25	1.07						1.45	0.46	1.34	1.32						2.6	1.2	1.73	0.61						1.66	1.22	1.51	1.68
2.47	1.47	2.08	0.93						3.11	0.139258	1.77	1.43						1.79	0.79	3.37	0.78						1.67	1.3	2.36	0.58						1.46	1.14	2.25	0.62						1.31	1.17	0.98	0.53
3.38	0.4	5.51	0.54						5.33	1.02849	2.04	0.84						3.23	0.52	2.39	0.79						1.86	1.45	1.18	1.33						1.73	0.81	2.44	0.74						1.48	1.21	1.55	0.9
3.95	1.28	4.64	1						4.78	1.19591	2.27	0.71						1.71	1	1.09	1.11						1.07	0.89	1.94	1.38						1.19	1.37	1.64	1.07						2.14	1.01	1.84	0.47
2.71	0.61	2.04	1.49						4.57	1.20008	3.75	0.63						3.46	0.98	1.85	1.04						1.34	0.24	1.99	0.54						1.89	1.41	3.66	0.84						1.91	0.25	1.23	0.55
4.9	1.14	4.06	0.72						3.96	0.168354	2.44	0.4						1.87	1.28	5.17	0.03						1.21	1.57	2.52	0.94						1.8	0.75	2.85	1.44						1.1	0.72	1.28	1.52
2.67	0.42	2.54	0.6						2.6	1.36471	2.26	1.13						2.47	0.57	1.7	0.93						1.53	0.88	2.84	1.03						1.62	1.43	2.66	0.72						1.57	0.28	1.23	0.49
2.39	1.59	1.85	1.11						3.39	0.192284	2.03	1.45						1.83	0.46	1.75	1.02						1.59	0.4	1.11	0.99						1.25	0.45	1.52	0.91						1.64	1.83	1.54	1.08
3.33	0.5	3.83	0.75						2.78	0.909615	3.69	0.87						2.13	1.41	1.51	1.04						2.74	1.12	1.57	0.91						1.84	0.43	2.04	0.33						1.03	0.85	0.9	0.72
2.81	1.76	4.03	0.87						2.43	1.15573	2.7	0.91						2.05	1.76	2.05	0.89						1.44	0.14	2.28	0.57						1.36	0.19	2.27	1.83						1.86	1.24	1.8	0.68
2.67	0.23	5.39	1.12						4.53	0.938452	2.82	0.64						3.63	0.26	1.76	0.86						1.68	1.34	1.49	1.14						1.62	0.13	1.86	1.7						1.37	1.01	1.34	1.43
3.14	0.43	3.2	1.09						3.81	0.844619	3.38	0.73						3.41	0.17	2.49	1.09						1.19	0.18	1.48	0.39						2.55	1.14	3.24	0.69						1.56	1.16	2.05	0.86
3.29	0.48	2.61	0.34						3.77	0.617594	2.76	1.34						3.93	1.17	1.95	0.72						1.82	0.74	1.43	0.86						1.65	0.4	2.88	0.66						1.6	0.26	1.78	0.92
5.31	1.67	2.34	1.41						3.02	0.663933	3.51	0.99						2.7	1.64	2.65	1.13						2.05	1.24	2.07	0.82						1.72	1.25	1.73	1.29						1.68	0.03	1.9	1.49
3.67	1	5.5	0.64						2.67	1.23473	1.81	1.18						1.65	0.19	2.66	1.08						1.5	0.24	1.88	0.73						2.07	0.33	1.81	1.78						1.27	0.88	1.24	0.46
2.73	0.27	3.5	0.87						3.52	0.115038	1.98	0.65						2.33	1.39	3.06	1.01						2.21	1.01	1.36	1.12						1.7	0.41	1.71	0.63						1.54	0.86	1.28	1.45
2.88	0.51	2.76	0.64						2.42	0.646453	3.64	0.72						3.47	0.99	1.21	1.23						1.9	1.36	1.73	0.81						1.95	1.82	1.58	0.86						1.32	1.09	1.77	0.69
3.59	0.8	3.39	0.83						2.64	0.218	3.15	0.84						2.93	1.07	1.43	1.26						2.47	1.08	1.74	0.77						2.77	1.33	1.99	2.83						1.26	0.53	0.95	0.43
2.77	2.14	3.68	1.63						2.6	1.52141	1.78	1.36						2.58	1.41	2.83	0.84						1.99	1.44	3.02	0.95						2.33	1.3	2.21	1.6						1.82	0.65	1.06	1.85
3.04	1.6	2.81	1.05						2.82	0.272524	3.31	0.91						2.11	1.39	1.71	0.69						2.46	1.16	3.04	1.04						1.96	1.01	1.43	0.84						1.5	0.83	1.42	1.04
4.02	1.3	2.34	0.77						2.63	1.0073	1.56	0.86						3.19	0.41	1.96	0.95						1.97	2.1	1.88	0.92						1.94	0.33	1.42	1.01						1.42	0.79	1.08	0.76
4.41	1.16	3.19	0.95						2.8	0.296661	1.87	0.69						2.8	1.6	2.74	1.22						1.22	0.34	2.8	0.83						2.1	1.34	1.78	0.81						1.86	1.11	1.33	2.08
1.89	0.89	3.29	1.16						2.81	1.08887	2.02	1.28						3.83	0.46	2.34	1.62						1.85	1.74	2.83	1.22						2.63	1.13	1.39	0.28						1.37	1.02	1.44	0.78
2.71	0.28	1.69	0.35						2.47	0.594401	2.64	0.68						2.65	0.65	1.5	1.1						1.39	0.64	1.62	1.27						1.72	0.32	1.37	0.73						1.37	0.36	1.68	1.2
1.48	1.16	2.35	1.38						1.38	0.1332	1.67	0.94						3.21	1.19	2.15	1.12						1.73	0.17	2.73	1.71						2.08	2.2	3.23	1.33						1.84	0.45	1.97	0.81
3.16	1.55	4.09	0.85						3.31	0.091735	1.63	0.7						2.24	0.61	2.8	1.12						1.54	0.31	1.65	1.17						2.25	1.35	1.71	0.62						1.17	1.12	1.32	0.74
2.58	0.16	4.41	0.82						2.66	0.697081	1.68	0.75						2.01	0.32	2.79	0.89						1.16	0.23	2.26	0.8						2.33	1.47	2.91	2.41						0.88	0.87	1.28	1.18
2.08	1.09	2.22	0.81						2.95	1.31312	3.28	0.75						2.44	1.66	2.83	0.71						1.22	0.98	2.08	0.79						2.18	1.14	2.09	1.32						1.65	1.52	1.13	0.98
3.4	2.06	2.82	0.78						2.47	0.338425	3.71	1.11						2.73	1.19	1.24	1.23						1.64	0.74	2.81	1.13						2.08	1.16	1.57	0.86						1.69	0.29	1.26	1.04
2.58	0.43	1.75	0.91						2.29	0.732057	3.13	0.81						1.95	0.22	1.55	1.14						2.18	1.25	3.24	1.03						2.17	1.42	1.61	1.06						1.87	1.4	1	0.81
3.13	1.58	1.65	0.4						2.06	0.997407	2.23	0.74						2.79	1.32	1.81	1.03						1.27	1.85	2.61	1.06						3.75	0.14	2.76	0.77						1.58	0.32	1.11	1.28
2.76	0.38	2.73	0.7						3.59	1.59293	3.12	0.96						3.65	1.41	2.12	0.87						1.58	0.49	1.81	0.59						2.21	1.29	2.49	0.72						1.69	1.23	1.16	1.65
1.94	0.23	2.44	1.14						2.24	1.58126	2.96	0.71						2.28	0.98	1.98	1.08						1.55	0.35	2.37	0.98						2.23	1.43	1.87	1.57						1.75	2.34	1.6	0.74
2.94	1.29	3.03	1.21						2.26	0.346956	2.92	0.72						3.04	0.92	1.94	1.16						1.52	0.12	1.94	1.13						2.55	0.6	2.4	0.79						1.92	1.19	1.65	1.85
3.63	1.23	2.16	1.42						2.09	1.31086	2.87	1.12						2.19	1.02	3.04	0.95						2.24	0.47	2.4	1.93						2.38	0.7	2.23	1.17						1.13	2.29	1.4	2.06
3.1	1.85	3.14	1.31						2.78	1.58424	2.78	0.94						1.84	2.26	2.66	1						1.66	0.12	3.09	1.12						2.28	1.27	2.54	0.81						1.65	0.33	1.33	1.15
3.31	1.94	4.35	1.1						3.66	1.78289	2.11	0.66						1.61	0.91	1.37	1.48						1.91	0.5	2.81	0.72						2.45	1.02	1.75	0.93						1.55	1.5	1.18	1.45
1.61	2.01	2.06	1.17						1.97	1.2858	2.39	0.81						1.26	0.45	1.86	0.87						1.25	0.84	2.63	0.98						1.92	1.78	1.81	0.86						1.65	0.13	1.32	0.87
3.57	1.58	2.38	1.34						1.63	2.37907	2.03	0.73						1.59	1.32	2.47	0.67						2.52	0.95	2.21	0.56						1.27	0.33	1.5	2.56						1.3	1.39	0.93	0.93
3.73	1.77	1.92	1.23						2.14	1.15752	3.08	0.78						2.44	0.52	2.02	0.95						1.24	0.59	2.67	0.61						1.41	2.63	1.39	0.74						1.65	1.51	1.66	1.29
3.12	1.31	2.01	0.74						3.51	1.18828	1.86	0.42						2.09	0.71	1.95	0.9						2.61	0.7	2.49	0.46						1.74	0.4	2.21	0.76						1.31	1.24	1.44	0.72
3.04	0.49	4.6	1.19						1.4	0.784703	2.02	0.53						1.47	1.02	1.9	0.88						1.68	0.05	1.72	1.07						1.9	0.14	1.97	0.51						1.97	1.1	1.15	1.1
3.44	0.35	1.91	1.16						3.44	1.23756	3.67	1.03						3.92	1.48	2.15	1.25						2.06	1.1	1.71	0.85						2.11	0.21	2.23	1.07						1.51	0.53	1.32	0.5
2.19	1.58	2.33	1.4						3.5	1.05339	2.59	0.82						2.92	0.52	2.38	1.27						1.62	0.57	2.52	0.57						2.8	0.9	1.69	0.99						1.25	2.68	1.5	1.51
4.27	1.47	2.67	0.65						4.33	1.71788	1.82	1.42						2.05	1.69	2.13	1.11						1.43	0.25	1.74	0.64						2.58	0.96	1.51	0.46						1.18	1.13	1.73	2.07
2.89	1.16	2.59	0.84						2.42	1.08949	2.77	0.84						2.37	1.42	1.71	1						1.97	0.77	1.74	1.44						3.36	0.66	1.3	0.95						1.78	1.26	0.94	0.92
3.31	1.24	2.24	1.88						1.77	1.19308	2.66	0.93						2.04	0.95	1.53	0.91						1.54	0.19	1.91	1.2						1.45	1.21	1.74	0.66						1.45	0.91	1.38	1.11
3.15	0.8	3.04	0.77						2.25	1.1717	2.33	0.98						2.27	1.82	1.79	1.43						2.32	1.08	3.17	1.11						1.38	0.36	1.58	1.11						1.72	0.26	1.56	1.85
3.76	1.56	3	0.97						1.95	0.904117	2.45	1.07						1.7	1.65	1.64	1.11						1.77	0.93	2.99	1.24						1.14	0.26	2.91	0.95						1.21	1.34	0.95	0.64
2.54	0.17	3.76	1.2						2.33	1.90297	2.38	0.38						3.02	0.3	2.53	1.21						1.95	1.57	2.57	1.3						1.29	0.24	2.63	1.3						1.48	0.53	2.38	1.44
2.36	0.15	2.72	1.2						2.46	1.64489	3.73	0.83						1.75	0.43	1.71	0.76						2.74	1.37	2.71	3.05						1.66	1.11	1.58	0.82						1.81	1.05	1.43	0.77
3.49	1.43	2.28	0.52						2.15	2.2312	2.91	1.29						2.45	0.7	1.57	1.29						1.53	1.02	2.49	1.62						1.82	1.16	2.07	0.86						1.79	1.05	0.97	0.73
2.4	0.55	3.04	1.22						2.49	0.864443	2.57	2.49						2.64	0.63	1.94	0.4						1.88	1.25	2.81	1.17						1.51	0.54	2.35	1.44						1.62	0.55	1.22	1.46
2.9	1.13	2.17	0.91						3.17	0.357349	3.04	0.9						1.4	0.26	1.5	0.58						2.09	1.34	2.15	1.39						1.33	1.01	1.79	1.49						1.23	0.67	1.1	0.85
2.68	0.76	3.24	0.94						3.52	1.26886	2.39	1.23						2.76	0.19	2.23	0.51						2.13	0.37	2.38	1.44						1.48	2.91	2.35	0.95						1.63	0.46	0.93	0.41
4.62	1.47	4.15	0.94						3.08	0.100308	2.07	0.92						2.53	0.57	1.57	1.83						2.16	0.74	1.8	1.23						1.02	0.74	1.88	0.54						1.42	0.75	2.23	0.82
1.5	0.68	2.51	1.64						2.31	1.56808	2.53	0.75						3.05	0.2	2.87	1.13						2.52	0.66	2.08	0.68						2.18	0.68	0.95	0.71						1.52	0.57	1.31	0.56
3.64	0.89	3.32	0.96						3.23	0.131455	2.5	0.97						1.5	1.64	2.22	1.03						1.69	0.89	1.1	1.93						2.06	1.66	1.97	0.98						1.32	0.99	1.34	1.38
2.25	1.6	2.48	0.66						2.29	0.914363	2.24	0.74						2.31	0.97	1.4	1.11						2.81	1.32	1.84	0.77						1.28	0.47	2.18	0.57						1.38	1.41	1.46	0.77
1.9	1.61	3.06	0.86						2.54	1.02969	1.82	1.08						3.34	0.37	3.32	1.32						2.43	0.94	2.44	1.09						1.5	1.26	1.44	0.93						1.64	0.1	1.03	1.83
2.67	0.88	2.93	1.03						2.2	0.861379	2.92	1.04						1.52	0.49	2.9	1.03						2.37	1.04	1.2	1.57						2.63	1.06	1.65	1.57						1.54	0.3	1.7	0.96
3.13	0.51	3.76	1						2.94	0.138027	3.31	0.85						2	1.94	2.52	0.94						3.05	1.15	1.9	1.06						1.54	1.77	2.51	0.61						1.78	0.16	0.95	0.58
3.01	0.25	3.69	0.82						2.61	1.47991	2.72	0.74						1.66	0.33	1.64	1.15						2.5	0.85	2.53	1.39						2.74	0.35	1.83	0.59						1.43	0.87	1.2	1.42
2.1	1.9	2.23	0.62						3.12	0.245659	4.07	0.78						2.34	1.14	2.55	0.99						2.22	1.08	1.63	0.69						1.29	0.43	2.71	0.75						1.66	0.61	1.52	0.58
3.15	0.26	4.95	0.74						4.23	1.3613	3.3	1.07						2.73	1.44	1.79	0.88						2.04	1.08	2.12	0.97						2	0.85	2.96	0.97						1.83	0.15	0.87	1.79
3.46	1.81	2.22	0.78						2.78	0.283728	2.88	0.82						3.83	0.33	2.18	0.98						1.74	0.35	1.76	1.87						2.12	1.41	2.42	0.64						0.92	1	0.83	0.7
3.75	1.7	3.57	0.96						2.33	0.443086	2.26	0.56						1.86	1.97	2.33	1.2						1.88	0.11	1.98	1.61						1.87	1.14	2.84	1.35						1.65	2.23	1.46	0.8
3.63	0.8	2.26	0.86						5.65	1.23721	2.58	0.9						2.77	1.58	3.05	0.98						2.17	1.59	2.72	0.92						1.69	1.57	2.67	0.77						1.58	0.96	2.15	0.58
3.06	0.3	2.22	0.4						2.7	1.51795	3	0.82						1.91	0.13	2.94	0.86						2.04	1.62	1.99	0.82						2.57	1.25	1.94	0.78						1.28	1.56	0.83	0.95
3.22	1.99	1.7	1.09						3.36	0.2549	2.07	0.55						3.54	0.26	1.99	0.47						1.14	0.55	1.92	0.55						2.71	0.92	2.9	0.88						1.83	0.09	1.11	1.37
3.06	0.44	3.62	0.98						4.71	1.27768	2.96	0.8						2.3	1.21	3	1.24						1.73	1.17	2.65	0.61						2.13	0.87	2.17	0.61						1.46	1.15	0.83	1.69
2.9	0.48	3.45	0.62						2.65	0.474031	1.87	1.13						1.62	0.2	4.14	1.41						1.85	0.37	1.44	1.79						2.04	1.47	2.87	0.98						1.6	0.04	1.51	1.18
2.46	1.34	3.47	1.24						3.43	0.7545	2.7	1.08						2.15	1.15	2.18	0.65						1.5	0.48	1.35	0.94						2.54	1.1	2.04	0.66						1.58	1.14	2.47	0.66
3.24	0.41	4.6	0.89						4.12	0.31106	3.81	1.24						2.53	1.26	1.7	1.29						1.67	1.61	1.71	0.8						2.37	1.29	1.49	1.89						2.13	1.26	1.29	0.98
3.71	1.64	1.99	1.16						3.32	0.227103	3.03	1.5						1.56	0.53	2.92	1.11						1.73	0.15	2.26	0.35						1.48	0.28	1.73	0.74						1.64	0.74	1.16	0.68
2.63	0.22	3.93	0.79						1.94	0.967537	2.77	0.91						3.65	0.18	1.75	1.18						2.13	1.1	2.16	0.64						2.15	0.76	2.19	0.64						1.85	0.12	1.79	0.96
3.47	0.8	3.34	1.51						4	1.0079	3.38	1.03						3.32	0.5	1.76	0.95						1.99	0.34	1.75	1.15						2.32	1.33	1.49	0.76						2.71	0.51	1.39	0.92
3.06	0.79	2.22	1.4						2.34	1.16086	2.33	1.06						2.75	1.68	1.46	1.55						1.57	1.76	2.35	0.61						2.13	2.16	1.86	1.02						1.29	0.6	0.82	0.33
2.73	1.46	4.95	0.7						3.88	1.57424	1.85	0.31						2.97	1.32	1.8	0.59						1.45	1.51	1.92	0.5						1.94	1.09	1.2	0.53						1.76	2.48	1.43	1.19
2.91	0.79	2.74	0.79						3.08	0.937166	2.8	1.01						2.6	1.15	2.11	0.69						1.62	1.23	2.82	1.22						2.78	1.41	1.69	1.22						1.38	1.12	1.36	1.23
4.56	1.08	2.36	0.99						3.81	0.24557	2.18	0.97						1.86	0.33	2.69	0.79						1.96	1.45	1.46	0.81						1.79	2.79	2.44	0.48						1.29	1.04	1.81	1.05
4.52	1.92	4.11	1.02						2.14	0.92956	2.47	0.74						2.44	0.86	2.31	0.72						2.9	1.23	1.65	1.02						1.8	0.92	1.47	2.32						2.16	0.48	1.42	0.47
3.33	0.91	3.26	0.63						3.51	0.626452	2.46	1.18						1.9	0.32	1.61	0.89						2.02	0.64	1.6	1.28						2	1.32	1.63	1.6						1.29	1.34	1.5	1.25
3.34	0.22	3.59	1.13						3.06	0.641822	2.66	1.28						2.06	0.48	1.67	1.32						1.62	0.28	2.45	1						3.06	0.8	1.44	0.53						1.1	0.8	1.6	0.94
1.53	0.31	3.73	1.03						2.75	1.11283	2.94	0.66						1.94	1.9	2.88	2.41						2.6	0.75	3.75	0.95						2.36	0.89	1.95	0.68						1.42	0.72	1.27	0.53
2.95	1.79	2.21	0.98						2.43	0.743129	2.62	1.18						2.59	1.46	1.39	1.5						1.56	0.59	1.96	1						1.57	1.13	2.15	1.94						1.46	2.02	1.83	0.68
1.68	0.75	2.24	0.96						2.3	0.665131	2.49	1.09						5.9	1.07	3.21	1.53						1.63	1.21	2.83	1.34						2.14	1.37	1.57	0.5						1.79	0.4	0.93	1.15
2.04	0.49	3.39	1.35						2.73	0.834692	3.82	0.97						3.5	0.56	2.82	1.21						1.93	1.03	2.19	1.1						2.17	0.73	1.74	0.61						1.81	0.2	2.52	0.64
2.08	1.17	2.87	1.02						2.73	0.853213	6.59	0.9						4.06	0.31	1.49	1.52						3.04	1.38	1.93	1.26						2.52	1.12	1.52	1.11						1.2	1.23	1.04	0.65
2.54	0.38	2.28	1.37						1.71	1.05192	1.81	0.8						1.96	1.08	2.97	0.88						1.4	0.75	3.09	1.15						2.35	1.29	1.65	1.78						1.26	0.4	1.03	1.25
1.73	0.87	1.79	1.06						2.78	1.42441	2.86	0.92						2.71	0.94	2.23	0.9						3.79	0.34	1.72	1.1						2.41	1.53	1.55	1.12						1.26	0.74	1.18	1.11
2.55	0.49	3.39	0.99						2.6	0.279776	2.32	0.92						2.52	0.86	1.89	1.11						1.6	1.07	1.65	1.15						2.03	0.38	1.36	2.15						0.94	1.25	1.44	0.91
2.38	0.31	4.31	0.77						2.11	1.12313	2.49	1.49						2.23	0.51	1.89	1.05						2.35	1.4	2.03	0.78						2.66	0.84	1.99	1.05						1.26	1.91	1.55	1.33
2.55	0.38	3.14	1.1						2.53	0.200616	1.78	0.59						2.49	0.57	2.1	1.13						1.34	1.01	2.45	0.67						2.56	0.94	2.09	0.51						1.16	1.76	1.09	1.21
2.8	0.37	3.35	1.02						5.02	0.911459	2.75	0.94						1.91	1.73	2	1.07						1.95	0.92	1.56	0.98						1.77	0.68	2.66	0.88						1.14	0.92	1.44	0.79
2.6	0.23	2.79	1.17						2.04	1.8841	3.61	0.64						1.79	0.24	2.59	1.04						1.33	0.21	2.52	1.07						2.46	1.54	1.85	0.96						1.35	1.55	1.12	0.7
3.56	1.81	2.88	0.97						1.92	0.909889	3.03	1.01						1.77	0.15	2.4	0.92						1.95	2.1	1.93	0.97						2.12	0.47	2.34	2.78						1.15	0.6	1.76	1.37
2.83	1.3	2.58	0.86						2.49	0.942353	2.54	0.52						1.97	0.15	3.05	0.92						1.36	0.55	1.7	0.94						2.63	1.96	3.17	0.74						1.29	1.08	1.3	0.53
2.81	1	3.19	0.87						4.59	1.24645	3.27	1						3.51	0.61	2.09	1.31						2.26	1.39	1.51	1.64						4.53	0.57	1.68	1.32						1.28	1.08	1.37	1.64
3.1	0.76	2.12	1.2						2.2	1.46791	2.3	2.3						2.75	1.91	2.59	0.83						1.26	0.62	2.42	0.78						1.26	1.86	1.09	1.98						2.07	1.1	1.48	0.71
3.18	2.35	2.19	1.42						3.21	0.12649	2.13	1.13						3.67	0.49	1.44	1.84						2.43	0.83	1.96	1.23						3.57	0.27	2.29	0.75						1.52	0.93	1.45	1.04
4.81	0.76	4.12	1.79						3.14	0.395655	1.83	0.81						1.58	0.71	1.62	1.02						1.54	0.22	2.81	1.37						2.75	1.2	1.58	2.17						1.24	0.87	1.98	1.13
2.52	0.29	2.07	1.37						2.87	2.69703	3.76	0.91						2.97	0.73	1.93	1.5						1.56	0.27	1.52	1.15						2.82	0.83	1.76	3.26						2.06	1.04	1.4	0.67
1.8	1.03	4.67	0.7						5.17	0.795087	4.12	1.19						2.24	0.74	2.15	0.91						1.05	0.77	1.28	1.08						2.07	1.8	2.27	0.56						1.66	0.22	1.33	1.16
3.3	1.9	5.41	0.93						2.93	0.091129	2.69	0.87						1.78	1.84	2.67	1.41						2.16	2.04	3.9	1.66						1.98	0.18	2.66	1.77						1.27	0.59	1.04	0.56
2.46	0.63	2.21	1.18						2.68	0.906023	2.85	0.9						2.43	0.26	2.71	1.68						1.6	0.28	2.32	1.12						2.91	0.47	1.93	0.66						1.1	2.24	1.19	0.83
2.97	1.08	2.81	1.32						2.8	0.472007	3.43	0.89						2.38	0.71	3.22	1.15						1.14	1.53	1.45	1.08						2.78	1.05	1.18	1.3						1.19	0.91	0.82	0.99
2.55	0.46	2.34	1.67						3.24	0.351006	2.46	0.89						1.28	0.2	2.48	1.18						1.72	1.8	1.51	0.4						3.74	0.45	1.54	0.87						1.73	0.79	1.09	0.8
2.06	0.82	3.45	0.88						3.68	0.293384	3.47	0.76						2.29	1.08	2.12	0.91						1.54	0.15	1.89	1.21						1.48	0.88	1.62	1.13						1.25	1.6	1.58	1.4
2.33	1.72	2.32	1.04						2.71	1.80695	3.59	0.83						1.92	0.81	2.11	0.51						1.74	0.31	1.23	0.57						1.82	0.19	1.79	1.74						2.09	1.15	1.46	1.06
2.35	1.21	2.44	1.17						2.95	0.191377	2.92	0.91						1.57	2.01	1.96	1						1.59	1.4	1.77	0.9						3.16	0.94	1.53	0.71						1.94	0.05	1.65	0.74
3.69	1.85	2.46	1.03						3.54	0.493206	2.56	0.98						1.33	0.48	2.34	0.67						1.48	0.37	1.5	0.88						4.21	0.34	2.25	0.76						1.68	0.09	0.91	0.88
2.61	0.22	3.94	0.78						2.51	1.73663	2.37	1						1.83	1.39	2.5	1.2						2.44	0.82	2.24	0.44						1.9	0.24	1.52	0.66						1.52	1.72	1.07	0.84
2.37	1.02	1.79	1.69						1.92	1.53199	2.02	1.45						1.75	1.39	2.36	1.07						1.12	1.43	1.55	0.95						1.57	2.23	1.6	0.76						1.49	1.84	1.06	2.53
2.52	1.3	3.83	0.71						2.19	1.34251	2.4	1.18						2.53	1.2	2.38	0.67						1.04	1.93	2.71	0.76						0.87	0.61	2.05	0.64						1.59	1.35	0.85	1.49
3.14	0.51	3.52	0.89						2.08	0.682445	3	0.97						1.95	1.29	1.68	0.73						1.57	1.02	1.73	1.08						2.1	0.82	1.85	0.99						1.74	0.44	0.92	1.85
3.22	0.23	2.21	1.81						3.24	0.294665	3.09	0.99						1.23	0.11	2.79	0.83						1.83	1.83	2.07	1.04						2.63	1.15	1.32	1.29						1.9	0.12	1.5	1.13
2.71	0.23	3.74	0.62						3.35	1.01231	2.37	1.02						2.98	0.38	2.2	0.73						1.62	0.36	2.84	1.13						1.58	1.55	1.37	1.11						3.72	1.1	1.31	0.83
2.26	0.99	3.64	0.94						3.91	0.883788	3.19	0.68						1.72	1.37	1.62	0.95						3.07	1.2	2.75	1.25						1.89	1.1	1.66	1.5						1.29	0.61	0.99	1.08
2.85	0.22	2.99	1.1						2.97	0.181602	2.12	1.04						2.5	0.15	2.19	0.73						1.5	0.5	3.98	1.27						1.33	0.84	1.91	0.67						1.76	0.21	0.93	0.3
2.6	0.2	3.49	0.79						4.44	1.35108	2.98	0.85						3.07	0.3	2.47	0.93						1.34	0.52	2.02	1.12						1.29	0.16	2.33	0.86						0.97	0.52	1.55	0.76
3.45	0.9	1.81	0.59						2.92	0.386677	2.44	1.76						1.4	0.5	1.59	1.71						2.5	0.87	1.47	1.94						2.11	1.05	1.34	0.84						1.24	1	1.29	0.76
4.48	1.16	4.25	1.17						2.82	0.519041	2.58	1.04						1.63	0.78	1.97	1.11						1.82	0.8	2.58	1.12						1.98	1.16	2.4	0.6						1.43	0.44	2.03	0.94
3.07	0.42	2.69	0.87						2.81	1.53494	2.32	2.1						2.19	2.35	2.14	0.72						1.02	1.08	2.65	0.88						1.93	1.18	1.91	0.73						1.57	0.3	1.09	0.94
2.33	1.49	2.29	1.1						2.83	0.30152	3.4	0.83						1.89	1.25	1.43	0.95						2.37	1.39	2.9	0.75						2.25	0.67	2.48	0.83						1.19	0.88	1.49	0.61
3.02	0.4	3.64	0.56						4.33	1.41662	3.37	1.14						2.05	1.61	1.68	0.49						1.21	1.46	2.59	1.28						2.55	0.81	1.99	1.29						1.4	1.42	1.11	2.49
4	1.19	3.21	0.8						3.13	0.475286	2.92	1.1						1.95	1.5	2.28	0.93						1.88	1.57	1.87	2.14						1.84	2.71	5.61	0.61						1.75	0.17	1.06	0.39
2.27	0.95	4.06	0.75						3.05	0.93064	2.44	0.91						2.23	1.39	2.65	1.26						2.66	0.47	2.05	0.97						1.44	0.26	1.66	0.79						1.35	1.94	1.06	1.73
2.35	1.69	3.29	1.01						1.81	3.4712	3.5	0.85						2.92	0.7	2.73	0.83						1.42	0.1	2.18	0.54						2.92	0.2	1.66	1.46						1.84	1.09	1.45	0.7
3.3	0.76	2.52	0.98						2.82	0.60002	2.29	0.77						2.84	0.61	2.59	1.18						1.71	1.08	3.08	0.78						2.28	2.2	2.39	0.87						1.11	1.42	1.01	0.68
2.43	0.31	3.09	1.15						2.84	1.4141	3.11	0.94						1.8	0.87	1.87	0.92						2.28	0.83	2.31	1.34						1.22	0.92	2.01	0.54						1.12	1.09	2.02	0.63
2.76	1.46	2.37	1.07						2.83	1.67404	1.76	2.22						1.58	0.79	1.99	1.03						1.66	0.89	2.27	0.79						2.28	0.63	3.16	0.64						1.18	0.87	1.53	0.73
3.41	1	2.11	1.34						1.86	0.791787	2.08	1.02						2.01	1.28	1.82	0.43						2.11	1.53	1.42	1.2						1.91	0.82	2.22	0.86						1.34	1.11	1.42	0.94
5.36	0.33	3.53	1.1						2.72	0.922102	3.27	0.81						2.91	0.27	2.23	1.38						1.74	0.36	1.45	1.04						1.25	1.57	1.3	0.77						1.47	0.94	2.19	0.54
2.44	0.67	2.91	1.07						2	1.03506	3.36	0.79						1.94	1.28	1.98	0.77						2.03	1.1	1.83	0.71						3.21	0.36	2.81	0.9						1.22	1.65	1.96	2
3.07	0.66	3.48	1.05						1.26	0.762278	2.67	1.41						3.59	0.36	2.45	0.85						1.83	0.11	2.94	0.84						3.3	0.35	2.21	0.55						2.25	1.34	1.5	0.7
1.86	2.15	2.39	1.3						1.82	1.28954	2.77	0.8						1.81	0.17	1.44	1						1.48	1.12	2.83	1.02						1.19	1.44	2.1	0.76						2.55	1.09	1.76	1.07
3.44	1.43	4.57	0.52						2.66	0.484283	2.51	1.28						3.18	0.31	3.48	0.98						2.19	1.65	1.9	0.77						1.82	1.16	1.79	2.56						1.35	0.68	1.92	1.08
2.73	0.32	2.99	1.5						3.13	0.79667	2.18	0.44						1.8	1.15	2.29	1.16						1.99	0.48	2.41	0.56						2.64	0.91	1.46	1.53						1.46	0.77	1.41	0.78
3.03	0.35	5.53	1.06						2.78	0.221721	2.92	0.86						3.4	0.85	2.02	0.76						1.63	1.58	1.58	1.08						1.95	1.22	2.15	0.94						0.89	0.73	1.59	0.66
2.65	0.63	2.69	1.08						2.82	0.307581	2.99	1.56						2.55	0.45	2.27	1.09						1.27	0.58	2.78	0.94						1.34	0.42	2.38	1.08						1.95	0.36	1.62	0.87
2.79	0.22	2.51	1.11						2.9	0.618915	3.11	1.59						2.01	1.03	2.99	1.48						1.5	1.64	2.41	0.95						1.16	0.86	2.8	0.68						2.01	0.29	0.83	1.31
2.81	0.4	3.84	0.68						3.51	1.29459	2.31	0.79						1.66	0.33	2.52	1.05						1.43	0.49	2.05	1						1	0.89	2.09	0.47						1.25	1.37	1.78	1.13
3.09	0.25	7.26	0.97						2.56	0.208948	2.92	0.67						4.2	1	2.35	1.47						3.34	0.11	4.42	0.79						2.61	1.3	2.7	1.41						1.69	0.19	1.74	0.9
1.91	1.93	3.01	1.37						1.92	1.20032	2.31	0.63						1.92	1.4	2.12	1.04						2.07	0.69	2.15	1.07						1.18	0.93	1.2	0.59						1.98	1.1	1.31	1.93
2.56	1.05	4.14	1.23						2.54	0.664715	2.48	1.63						3.41	0.64	1.75	1.41						1.97	0.13	2.51	0.57						1.5	0.88	1.95	1.82						1.56	0.81	1.04	0.56
3.8	0.98	4.32	0.88						1.44	0.847762	2.98	0.98						2.4	0.98	1.96	2.04						1.77	1.17	1.67	0.56						2.13	1.15	2.61	0.7						1.92	0.2	1.29	0.72
2.44	1.3	3.66	1.18						2.96	0.128724	1.99	0.93						3.29	0.5	2.6	1.52						1.59	0.68	2.5	0.8						3.18	0.15	2.48	1.49						1.6	0.52	1.35	0.69
4.91	0.71	3.27	0.76						3.35	1.54025	2.22	0.81						3.1	0.56	2.4	0.84						1.79	0.45	1.63	0.52						2.34	1.21	1.48	0.51						1.43	0.85	1.52	0.66
3.5	1.36	3.92	0.75						3.57	1.55922	1.71	1.35						2.51	1.78	2.4	0.82						2.61	1.22	1.74	1.31						2.11	1.59	2.68	1.48						1.67	0.17	1.33	0.57
3.91	1.49	2.63	1.38						2.05	1.69571	2.29	0.65						2.99	1.02	2.18	1.02						2.09	0.53	3.29	1.32						1.6	0.34	1.85	1.34						1.56	0.89	1.4	0.65
4.31	0.81	1.84	0.68						2.37	1.50433	1.91	0.65						3.51	0.7	2.71	0.64						1.94	0.33	2.06	0.79						1.99	0.5	2.41	0.4						2.32	0.36	1.51	0.63
2.91	0.28	5.22	1						2.49	1.27874	2.5	1.82						3.49	1.35	1.92	0.69						1.58	0.34	3.22	1.15						2.71	0.81	2.05	0.72						1.99	0.07	1.54	0.73
5.11	0.67	3.92	1.6						3.2	0.88435	3.25	0.7						2.06	0.58	1.57	0.96						1.46	1.12	2.55	0.96						3.55	0.4	1.95	0.42						1.66	0.45	1.11	0.89
2.92	0.55	5.79	1.11						2.63	0.960813	3.64	0.87						3.31	0.45	1.24	0.77						2.04	0.17	2.26	1.44						2.96	1.39	2.15	0.78						1.31	1.11	0.81	0.71
3.06	0.13	2.89	1.64						2.65	1.22093	1.89	0.82						3.91	0.9	2.03	1.24						1.96	1.47	1.77	1.64						4	0.59	2.04	0.44						1.26	1.32	1.79	1.76
2.89	0.24	4.07	1.64						2.51	0.635347	2.71	0.96						2.27	0.93	1.73	0.92						1.43	1.09	1.7	0.97						3.72	0.79	2.15	1.9						1.51	0.2	1.75	0.49
2.74	2.54	4.81	0.71						2.94	0.886677	3.29	1.03						2.17	1.25	2.19	0.82						1.63	0.9	2.77	0.83						2.42	1.56	2.36	0.87						1.99	1.57	1.04	1.91
3.58	1.61	4.35	0.81						2.43	1.52443	2.16	1.04						1.61	0.23	1.37	1.11						1.68	0.16	1.17	1.2						1.45	1.57	2.33	2.12						1.78	0.83	1.2	1.24
2.12	0.29	2.42	1.41						3.61	0.208227	2.78	1.16						2.28	1.22	2.68	1.28						2.54	1.65	1.7	0.86						3.08	1.1	1.55	0.85						1.39	1.54	1.25	0.57
2.26	1.17	2.92	0.75						4.35	1.33941	2.82	1.61						1.86	0.35	1.77	0.46						2.34	1.54	1.9	0.63						2.68	0.98	1.9	0.32						1.1	1.92	1.24	0.81
1.56	0.37	2.59	1.03						3.32	0.436773	3.11	1.3						2.66	1.13	2.14	1.24						1.94	1.24	1.57	1.14						1.66	1.11	2.54	1.45						2.21	1.1	1.52	0.54
2.73	1.04	3.43	0.95						2.18	0.947987	3.4	2.05						2.78	0.69	1.95	0.79						2.07	1.05	4.55	0.88						2.06	0.95	2.33	0.67						1.58	0.16	1.2	1.07
2.76	0.96	2.78	1.32						4.09	1.02947	3.45	0.77						2.09	0.82	2.25	0.73						1.29	0.7	1.4	1.3						3.71	0.92	2.37	0.58						1.55	0.28	1.46	1.12
3.19	1.6	2.43	1.19						3.77	0.375352	2.75	0.92						1.48	1.62	2.13	1.33						1.81	0.94	2.1	0.69						2.07	1.24	1.01	0.77						1.68	0.19	1.66	0.58
2.82	1.2	2.87	0.77						2.18	0.730594	3.81	1.07						2.23	1.1	1.99	0.79						2.08	0.53	2.25	1.39						3.01	0.55	1.54	0.95						1.19	0.75	1.43	1.02
2.73	0.84	2.08	0.79						2.18	1.59528	3.43	0.58						1.55	0.13	1.95	0.94						4.42	1.02	2.26	1.4						3.1	0.78	2.24	1.21						2.16	0.92	1.18	1.44
2.58	0.33	2.4	2.11						2.84	1.04037	2.34	0.75						1.57	1.79	2.17	1.95						1.54	0.8	1.67	1.47						3.54	1.35	1.59	1.74						1.6	0.26	1.31	1.25
2.22	0.19	3.22	1.39						2.6	1.63996	3.3	1.15						1.37	0.44	2.3	0.85						1.26	0.85	2.13	0.9						1.83	0.32	1.76	0.83						1.23	1.04	1.62	1.25
2.92	0.36	3.2	0.58						4.27	1.36371	2.98	0.97						1.75	0.85	1.38	1.69						1.74	0.63	2.74	1.13						1.73	1.09	3.85	0.95						1.86	1.31	0.9	0.88
2.39	0.9	2.3	0.75						3.42	0.238465	3.42	0.97						2.37	0.52	2.17	0.99						1.96	1.27	2.55	1.53						1.43	0.82	1.46	0.82						1.31	0.97	1.06	1.13
1.96	0.63	3.39	1.12						2.89	1.49007	2.31	0.82						1.63	1.81	1.86	0.95						2.15	1.51	1.21	0.72						1.95	1.01	1.93	0.46						1.47	1.36	1.39	1.14
2.98	0.81	2.68	0.92						3.7	0.143539	2.44	0.83						2.45	0.58	1.95	0.98						1.76	0.28	1.39	0.88						1.07	0.89	1.37	0.65						1.34	0.88	1.71	0.74
3.86	1.19	2.65	1.52						3.19	0.154093	2.74	1.05						1.37	0.08	1.92	1.24						2.13	2.68	2.74	1.22						2	2.36	2.57	0.66						1.39	1.8	1.45	1.71
1.86	0.93	2.89	1.18						3.24	0.558659	2.64	1.23						2.5	0.47	1.54	0.94						3.14	1.16	2.09	0.93						1.28	0.42	1.86	0.76						1.17	1.31	1.48	1.27
3.23	1.71	1.91	1.21						4.08	0.918086	2.24	0.79						2.3	1.85	2.09	1.3						3.25	1.08	3.18	0.76						1.62	0.33	1.85	1.18						1.69	0.15	0.96	1.73
2.75	0.58	2.13	0.66						3.67	1.57882	3.41	1.76						2.59	0.33	2.4	0.98						1.73	1.34	1.8	1.59						1.61	1.41	1.75	0.94						1.22	1.21	1.55	1.39
2.91	1.43	3	0.74						1.54	0.958481	2	1.29						2.36	1.33	2.6	1.2						2.98	2.38	1.81	0.5						2.62	1.08	2.7	0.93						1.7	0.11	1.09	1.22
2.26	2.38	3.01	0.94						1.05	0.140982	3.01	0.85						2.33	1.23	2.7	1.04						2.74	1.37	2.21	1.25						2.84	0.26	2.35	0.8						1.91	1.41	1.67	0.88
3.27	1.45	1.35	0.76						1.96	1.57777	2.64	0.98						1.77	1.5	1.98	0.53						2.43	1.09	2.25	1.46						1.55	1.69	1.45	0.67						0.92	0.57	1.57	1.25
3.74	1.68	2.05	1.18						2.14	0.539211	2.82	1.1						1.57	0.65	2.15	0.79						3.31	0.14	1.81	0.6						1.31	1.28	1.43	0.39						0.92	1.27	1.66	0.58
2.84	0.59	3.37	0.97						2.45	1.27581	2.3	0.72						3.41	0.28	2.39	1.5						2.8	0.8	1.6	0.92						1.69	0.09	2.58	0.6						1.78	0.14	1.23	1.13
2.17	1.74	2.88	0.84						2.62	0.221566	1.98	0.33						3.38	0.17	1.65	1.17						4.23	0.46	1.6	0.98						2.44	2.16	1.39	1.33						1.61	1.22	1.62	1
1.91	1.04	2.04	0.7						2.97	1.35758	3.36	0.9						1.76	1.25	2.12	0.94						3.08	1.48	1.58	0.82						2.89	0.15	1.92	0.35						0.98	0.5	1.23	2.45
2.59	0.59	2.3	1.01						2.69	0.216713	2.52	0.99						2.66	1.04	2.65	0.98						1.82	0.76	2.61	0.76						1.7	0.68	2.35	0.68						1.35	1.14	1.52	1.42
3.82	1.32	3.68	0.51						2.48	0.222707	1.91	0.79						1.98	0.43	1.66	1.08						2.11	0.3	2.95	0.86						0.94	1.52	1.37	0.66						1.06	0.51	1.25	1.02
1.97	0.75	2.12	0.91						2.03	0.58562	2	0.66						3.25	1.35	2.02	1.21						1.85	1.05	2.47	0.91						2.02	0.87	2.12	1.07						1.43	0.95	1.56	0.51
2.57	1.4	3.32	1.6						2.11	0.809407	4.07	0.81						1.92	0.87	2.48	0.73						1.82	0.17	2.23	0.63						1.5	0.55	1.83	2.1						1.31	1.21	1.26	0.85
1.9	1.34	2.69	0.93						1.87	1.43543	3.8	1.2						1.76	0.12	3.37	1.28						1.6	0.13	2.02	0.65						1.52	0.55	1.6	1.07						1.92	0.88	1.65	1.92
5.44	0.46	6.16	1.08						2.25	0.834941	2.26	0.96						1.96	0.81	2.52	1.04						1.39	1.03	3.27	1.24						2.47	0.77	1.54	1.19						1.29	1.22	1.27	1.34
2.45	0.51	5.34	0.75						1.3	0.552698	1.96	0.9						2.06	1.01	2.06	0.88						2.23	1.14	2.7	0.65						2.94	0.76	1.55	0.41						1.27	0.02	1.65	0.85
1.75	1.39	2.6	1.89						3.21	0.57217	2.33	1.07						3.22	0.32	2.11	1.21						2.71	1.1	2.02	0.79						2.69	1.09	2.13	0.83						1.07	1.19	1.29	0.79
4.07	1.27	4.45	0.97						4.24	2.1894	3.15	1.14						2.92	0.56	1.68	1.27						2.29	1.48	1.95	1.06						3.05	0.43	1.57	0.56						1.52	0.35	1.17	0.89
4.07	1.3	3.66	1.02						2.93	0.340966	2.73	0.95						4.08	0.57	2.27	1						2.94	1.18	2.6	0.66						3.9	0.09	1.49	0.39						1.05	1.15	1.18	1.3
3.05	0.11	2.53	1.14						2.2	1.16131	3.18	1.44						2.4	1.5	2.41	0.84						1.83	0.23	2.51	1.32						1.7	0.14	1.54	1.67						1.24	0.78	1.15	0.93
3.67	1.57	3.64	0.7						4.08	1.70036	2.37	0.86						3.01	1.16	1.9	1.28						1.06	0.82	1.49	0.84						1.05	0.95	1.88	0.65						1.51	0.43	1.32	0.72
2.91	1.13	2.5	1.23						3.51	1.30285	2.66	3.2						2.34	1.23	2.45	0.86						1.07	0.47	1.57	1.77						2.34	1.3	1.66	0.96						2.57	1.75	1.43	2.3
4.17	1.22	2.64	0.84						3.67	0.804413	2.64	0.69						1.45	0.16	2.55	1.05						1.56	0.32	1.87	0.35						2.04	0.48	2.1	0.45						1.21	1.52	1.52	1.04
2.4	0.49	2.78	1.43						2.71	1.12964	2.47	0.73						1.95	0.16	1.85	0.9						1.12	0.63	1.28	1.91						1.74	0.51	1.73	0.5						1.44	1.68	0.99	0.39
4.6	1.54	3.04	1.42						3.88	1.58017	2.89	1.07						3.55	1.03	2.16	0.89						1.64	0.26	2.06	1.04						3.34	0.85	1.8	1.33						1.93	2.41	1.05	0.53
1.92	1.15	2.44	1.24						1.69	0.775152	2.46	0.78						2.55	1.24	2.29	0.68						0.78	0.92	1.52	0.28						3.28	0.11	2.66	1.56						1.58	0.28	1.96	0.92
2.11	1.49	2.91	1.24						3.15	0.161699	2.32	0.74						1.97	0.86	2.28	1.43						1.05	0.84	2.51	0.89						2.18	1.52	2.3	0.61						1.16	1.1	1.89	0.96
2.85	0.19	4.31	0.85						2.79	0.982643	3.81	0.85						1.99	0.26	2.58	1.27						1.38	0.8	2.9	0.99						1.84	0.34	2.15	0.67						1.8	1.32	1.01	0.4
4.14	1.5	3.79	0.98						3	0.197117	3	1.07						2.08	0.41	1.77	1.54						1.65	1.06	2.7	1.17						2.71	0.95	1.59	0.78						1.27	0.66	0.94	1.11
2.16	1.82	4.13	1.28						3.78	1.4494	2.57	1.18						2.71	1.43	2.87	1.2						1.2	0.85	1.45	1.48						2.79	0.94	2.62	1.59						1.62	0.14	1.64	1.18
2.48	0.27	2.62	0.82						2.15	2.24221	3.29	0.78						2.44	1.37	2.34	0.94						1.86	1.42	2.05	1.59						2.28	0.2	2.73	1.77						2.03	1.43	1.57	0.67
4.54	1.4	2.34	0.97						2.21	1.45796	3.03	1.23						2.58	1.48	1.51	0.86						1.71	1.58	2.77	1.22						2.73	1.05	2.18	0.93						1.82	1.35	1.27	1.75
2.76	1.02	2.63	1.18						4.3	0.441297	3.07	1.13						2.44	1.16	2.61	0.56						2.39	1.02	1.41	1.16						1.72	0.42	3.29	1.32						1.76	1.06	1.45	0.04
3.75	1.08	3.42	2.02						4.14	1.16041	3.1	0.98						2.62	1.09	2.52	0.79						1.68	1.41	1.27	1.38						2.31	1.18	2.81	0.84						0.84	0.07	1.45	1.13
2.33	0.38	2	0.83						4.16	1.4859	3.53	0.87						2.38	1.74	1.88	1.44						1.5	0.97	1.25	0.87						2.69	1.2	2.42	0.62						1.21	0.81	1.46	0.56
2.66	0.9	3.82	0.77						2.32	0.869945	2.37	1.2						2.83	1	2.76	1.25						2.07	1.19	2.28	1.08						4.21	0.48	1.72	1.56						1.91	1.44	2.07	0.8
4.19	1.42	4.15	0.82						4.15	1.08569	2.28	1.08						2.83	1.63	3.68	0.73						1.58	1.66	1.71	1.44						3.01	1.22	3.32	0.78						1.29	1	1.08	0.57
2.93	0.32	3.05	1.06						3.03	1.54478	1.53	0.91						2.72	1.5	2.36	0.82						2.25	0.68	1.87	0.93						7.04	1	1.98	1.07						1.88	1.66	1.2	1.31
4.8	0.68	2.4	0.53						3.96	1.18763	2.04	0.93						2.91	0.89	1.89	0.76						2.51	1	2.5	0.87						1.96	0.93	1.23	1.51						1.19	0.37	1.09	0.77
2.32	0.61	3.39	1.52						2.29	0.881346	1.91	0.86						2.67	1.41	2.47	1.31						2.98	0.45	2.66	1.1						1.98	1.77	1.98	0.57						1.73	0.35	1.29	0.65
3.56	1.61	2.74	1.38						4.04	1.21671	2.38	0.84						3.08	1.64	2.62	1.38						1.97	1.38	2.69	0.93						1.62	1.17	1.63	1.37						1.8	0.85	1.58	0.89
3.53	0.8	3.07	1.33						1.87	1.87566	2.01	0.68						1.89	0.74	1.87	0.8						2.08	1.62	2.8	1.24						3.26	0.78	1.15	0.56						1.08	0.43	2.1	0.61
3.06	0.16	5.05	1.17						3.46	1.63622	4.73	0.9						3.79	0.26	1.83	0.96						1.81	1.27	1.94	2.12						3	1.08	2.85	0.73						2.09	1.67	1.4	1.04
3.37	0.83	2.84	1.11						2.79	1.42739	2.86	1.01						3.12	1.1	3.21	1.18						1.26	1.67	2.87	1						2.5	1.16	2.26	1.12						1.45	1.59	1.13	0.89
2.42	0.98	2.82	1.04						3.37	0.45893	1.74	1.15						1.58	0.25	1.6	1.08						2.16	1.77	1.84	1.12						2.93	1.14	2.34	0.81						0.83	0.64	1.12	2.02
3.57	0.32	3.47	1.04						2.72	0.326587	2.36	1.22						1.08	0.83	1.79	0.8						1.6	0.26	1.72	1.39						2.18	0.73	1.76	0.59						4.27	0.54	0.98	0.8
4.23	2	2.47	0.84						3.68	0.250109	4.02	0.94						1.72	0.19	1.42	1.16						1.38	0.65	3.03	1.24						2.74	1.27	3.29	0.86						1.29	0.99	0.64	2.6
2.78	1.01	3.3	0.92						3.4	0.171461	3.88	0.72						1.75	1.17	1.85	0.87						3.35	0.72	2.56	1.48						1.45	0.75	2.13	0.54						1.48	1.45	1.86	1.09
4.32	1.44	4.27	0.93						3.69	0.331799	3.35	1.16						1.9	1.7	1.71	0.49						1.86	1.61	1.34	0.78						2.31	1.21	2.71	0.94						1.4	0.67	1.85	1.47
3.99	1.32	4.87	0.85						2.08	3.84469	1.9	0.56						1.69	0.18	1.75	0.49						2.43	1.12	1.25	1.1						2.44	0.28	1.78	1.49						1.78	1.09	0.95	0.97
2.77	0.87	3.32	0.59						3.33	0.257532	2.55	0.81						1.52	0.34	1.83	1.31						2.27	1.14	1.21	1.22						1.47	2.35	2.03	0.87						3.33	1.01	1.63	0.81
1.85	0.63	2.27	1.49						3.08	1.39236	3.66	0.71						2.64	0.82	2.71	0.86						1.93	1.38	2.76	1.22						2.22	1.62	1.69	0.51						2.06	1.05	0.89	0.55
2.41	0.24	2.97	0.78						2.07	1.4111	2.64	1.12						1.09	1.44	2.47	1						2.21	2.03	2.66	1.53						2.04	0.61	1.85	0.88						1.59	0.5	1.06	0.81
2.94	1.01	4.12	0.8						3.35	0.259431	2.36	0.99						2.1	1.07	3.05	1.01						1.34	0.95	2.1	0.91						1.48	1.15	2.02	0.63						1.97	1.68	1.08	1.62
4.38	0.81	3.16	0.8						3.58	1.39479	2.29	0.65						1.95	1	2.72	0.91						1.03	1.28	1.77	1.15						1.29	0.85	1.55	0.38						1.6	0.26	1.67	1.08
1.65	0.6	4	0.78						3.4	0.321103	3.69	0.98						2.27	1.46	1.49	0.88						1.46	1.05	2.08	0.82						2.45	0.98	1.47	0.88						1.49	0.18	1.08	0.66
2	3.36	2.73	1.48						4.33	1.33517	3.35	1.34						4.2	1.16	1.75	0.87						1.94	1.76	2.33	1						2.31	1.1	2.85	1.35						1.24	1.17	1.02	0.92
1.74	0.96	4.59	0.78						2.83	0.498562	3.19	1.19						2.08	1.01	2.83	1.36						2.19	0.99	2.72	0.99						1.66	0.19	2.22	0.93						1.03	1.08	1.85	1.3
2.99	1.4	2.62	1.24						2.85	1.6355	2.89	1.79						3.03	0.28	2.03	1.34						1.95	0.66	2.61	0.91						2.49	0.43	2.28	1.01						0.94	0.88	1.05	1.02
2.76	2.05	2.8	0.81						2.68	1.80394	2.43	0.68						1.58	1.05	2.17	1.19						1.78	0.24	2.95	0.98						1.84	1.54	2.54	1.26						1.43	0.82	0.88	0.85
2.62	0.64	2.25	1.21						2.31	0.790613	2.88	1.31						1.99	1.49	2.8	0.88						2.13	1.32	1.47	0.63						1.33	0.4	2.23	0.59						1.28	1.71	1.59	1.03
2.13	2.88	1.61	0.88						2.71	0.663852	3.92	0.69						1.36	0.14	2.01	0.61						1.77	0.34	2.87	1.25						2.05	1.39	1.43	0.91						1.26	1.14	1.92	1.09
4.32	0.87	1.91	0.83						2.62	0.344613	3.02	0.89						2.84	1.48	2.14	0.52						1.86	0.87	1.86	1.13						2.14	2.14	1.74	0.6						1.24	2.37	1.24	0.44
3.26	0.8	1.59	1.4						3.71	1.48872	2.66	0.75						2.7	1.22	2.81	1.33						1.78	1.73	3.05	0.87						1.19	1.1	2.31	0.88						1.86	0.37	1.99	1.25
3.22	1.05	1.75	0.6						3.12	1.28487	2.41	0.76						3.33	0.3	2	0.88						1.89	1.25	1.34	0.84						1.66	0.74	1.85	1.8						2.03	1.24	1.62	0.91
3.51	1.22	1.77	0.6						2.07	0.33668	3	3						2.1	0.81	1.85	0.98						2.46	0.8	1.38	1.58						1.75	0.57	2.11	0.44						2.02	1.03	1.39	0.77
3.15	0.25	2.19	1.37						2.4	0.561339	2.72	1.09						2.04	2.26	3.21	0.99						1.27	1.16	2.02	1.55						1.91	0.63	1.26	0.62						1.43	0.72	1.24	1.09
4.38	1.64	2.79	0.58						2.61	0.150833	3.18	0.51						2.77	1.15	1.82	1.28						3	0.47	1.49	0.73						1.37	1.13	2.75	0.91						1.76	0.61	1.34	0.45
2.08	1.88	1.68	0.36						2.45	0.165079	1.82	0.97						1.9	1.73	2.84	0.85						1.62	0.13	1.99	0.96						1.98	0.62	2.42	0.59						1.11	1.41	1.12	0.76
2.47	0.4	3.2	1.62						2.07	0.441555	2.56	0.77						2.62	0.84	2.86	0.82						2.27	1.72	2.11	1.15						1.65	0.36	1.56	1.39						1.42	1.36	1.12	0.74
3.21	0.41	3.54	1.05						2.59	0.502279	2.17	1.25						1.06	0.11	2.81	0.98						1.89	0.87	2.02	1.1						3.07	0.64	1.31	2.63						1.52	0.64	1.15	1.32
3.12	0.94	1.85	1.23						2.44	1.97619	2.34	0.71						2.34	1.56	2.58	1.11						1.76	0.2	2.37	0.82						2.82	0.28	1.5	0.54						1.2	0.99	1.41	1.33
1.92	0.83	2.49	1.17						2.14	0.86135	1.65	0.46						2.09	0.78	2.6	1.45						2.34	1.09	1.58	0.72						2.29	0.79	1.96	0.83						1.78	0.19	1.26	1.65
4.63	0.71	2	0.86						2.61	0.26108	1.87	2.6						2.99	0.89	3.02	1.22						1.97	1.99	3.31	0.82						2.24	0.74	2.81	0.84						1.53	1.45	1.88	0.97
2.8	0.55	2.02	1.74						1.71	1.39571	2.27	1.52						2.67	1.62	2.87	1.71						2.33	1.16	3.92	1.05						1.53	1.11	2.48	1.06						1.35	0.88	1.68	0.79
2.96	0.28	1.65	1.57						3.17	0.540791	2.58	0.94						1.76	1.59	1.87	0.74						1.75	0.11	2.2	0.71						1.51	0.07	1.8	0.92						1.23	1.57	1.87	0.66
5.93	0.21	3.06	0.71						3.4	1.17542	2.53	0.8						2.88	1.02	2.17	0.94						1.43	0.67	2.48	0.88						1.96	1.23	2.17	1.32						1.75	0.66	1.87	1.05
3.71	0.82	1.71	0.58						2.99	0.306947	2.66	1.21						2.96	1.4	3.54	1.05						1.25	0.81	1.58	0.89						1.71	0.41	2.64	1.18						2	1.35	1.28	1.24
2.24	0.98	2.59	2.41						2.22	2.21466	2.44	0.78						1.62	0.27	2.16	1						2.62	1.03	3.59	1						1.66	0.21	3.8	0.91						1.13	0.33	1.55	0.44
2.51	0.58	2.66	1.12						2.09	0.764476	2.4	0.88						2.78	1.32	2.88	0.89						2.06	1.23	1.54	1.07						2.68	0.84	2.22	0.43						1.08	1.12	1.62	0.81
5.56	0.92	2.08	1.03						1.76	2.0134	2.4	0.99						1.75	0.21	2.88	1.2						2.39	1.3	2.09	1.46						1.77	0.14	2.38	0.43						1.2	1.88	1.35	1.21
3.49	0.78	3.68	0.82						2.66	0.152206	1.97	0.61						1.58	0.84	2.38	0.9						1.78	0.99	1.83	0.66						2.32	0.89	2.2	1.07						1.27	0.91	1.1	0.66
1.7	2.25	2.2	1.34						2.8	0.640055	2.75	1.19						2.05	1.04	2.69	1.08						1.55	1	1.61	1.43						1.95	1.43	2.24	0.97						1.6	0.62	1.1	0.92
3.25	2.02	4.1	0.96						3.81	0.690051	2.36	0.98						2.08	1.39	2.94	0.7						2.53	1.77	1.74	0.84						1.42	0.41	1.39	0.83						1.36	0.88	1.91	0.72
2.26	1.31	2.81	0.62						3.06	0.234525	4.66	0.91						4.48	0.99	2.41	1.54						1.49	0.55	1.84	1.25						2.29	0.77	2.24	0.85						1.49	0.65	1.61	0.9
3.77	1.87	2.68	1.07						2.99	0.184343	2.16	0.96						1.96	0.16	2.95	1.82						1.71	0.53	2.4	1.31						1.99	0.85	1.59	1.02						1.86	1.02	1.26	0.79
3.13	0.26	2.63	1.58						2.67	0.174363	2.61	0.76						3.44	1.03	1.36	1.2						3.45	0.55	1.44	1.08						2.71	1.09	3.02	1.71						1.05	0.98	1.24	1.47
2.92	0.58	2.67	1.14						3.37	1.23497	2.65	0.88						1.55	0.16	2.36	1.26						1.84	0.41	1.76	0.89						2.23	0.95	1.65	0.7						1.59	0.25	1.5	0.64
5.4	0.52	2.57	1.29						1.48	0.203621	2.91	0.77						3.2	0.4	1.64	1.04						2.13	1.44	2.39	1.29						1.83	0.21	2.06	1.28						1.92	0.79	1.21	0.61
2.93	1.15	3	0.87						2.86	0.183139	2.07	0.74						2.14	1.19	2.21	0.89						1.61	0.35	2.14	0.59						2.55	1.02	2.33	1.06						1.05	0.56	1.05	0.49
2.56	0.48	2.51	1.57						2.96	0.463813	2.29	1.26						2.4	0.64	2.46	1.12						2.24	2.38	2.02	0.68						1.72	0.14	1.34	0.97						1.32	0.66	1.43	1.37
3.43	0.77	3.08	1.27						4.07	1.30229	2.2	0.94						1.63	1.42	1.42	0.62						1.08	1.08	2.51	1.49						2.37	0.99	1.15	0.61						1.87	0.4	5.13	0.62
4.1	17.08	1.56	0.56						3.67	0.901263	2.47	1.24						3.73	0.29	3.13	1.04						2.11	1.71	2.19	0.66						1.22	0.5	2.09	0.77						1.69	1.13	1.41	1.26
3.7	1.06	2.14	0.54						3.01	0.665149	4.39	0.77						2.09	1.39	3.33	0.98						2.37	2.53	1.61	1.24						1.67	0.93	2.17	0.52						1.32	1.18	0.99	1.62
3.47	1.4	2.35	2.01						4.23	1.50469	3.02	1.29						1.92	0.16	1.84	1.17						1.26	0.84	2.41	0.66						2.07	1.51	1.93	1.38						1.05	0.73	1.38	0.66
4.02	1.27	4.83	0.78						2.06	2.42837	2.18	1.03						4.19	0.16	2.69	1.17						2.31	1.27	1.82	1.19						2.03	0.65	2.38	1.58						1.43	1.62	1.16	0.97
3.09	0.27	3.78	1.15						2.15	1.60545	2.01	0.5						3.82	0.58	2.46	1.23						1.85	0.76	1.62	1.31						1.7	0.19	2.42	1.06						1.44	0.92	1.13	1.56
2.49	0.24	2.71	1.16						5.22	1.26792	2.7	1.14						2.99	0.71	2.06	0.88						2.69	1.06	2.35	0.68						3.06	1.97	2.08	0.34						1.07	1.21	1.19	0.91
2.2	1.42	2.63	0.95						3.15	0.150518	2.62	0.43						1.5	1.27	2.31	0.76						3.5	1.06	2.34	0.63						2.19	1.05	1.35	0.86						2.22	1.56	1.58	0.73
3.89	1.45	2.17	1.04						2.75	1.61523	2.44	1.01						1.07	2.22	2.88	1.29						2.41	1.54	2.05	0.79						3.11	0.55	2.23	0.55						2.3	1.78	1.36	0.67
2.51	0.29	2.61	0.9						4.34	1.08795	3.12	0.86						1.99	1.31	1.83	0.58						1.76	0.13	1.86	0.77						1.51	0.05	1.79	0.56						1.65	0.1	1.63	0.93
2.39	0.77	4.79	1.13						3.7	0.307103	3.01	0.92						0.9	0.43	2.14	0.62						2.97	1.19	1.82	0.54						1.86	0.98	2.05	0.5						1.76	0.14	2.07	0.69
3.02	0.4	2.66	0.88						2.32	1.59493	2.44	1.19						1.53	0.16	2.97	1.14						2.14	0.58	2.45	0.5						2.76	1.44	2.21	0.6						1.22	1.21	1.92	0.97
3.15	0.45	2.38	1.2						4.3	1.36282	2.93	0.97						1.54	3.4	2.65	0.93						3.52	1.15	2.09	0.69						2.93	1.33	1.62	0.89						1.76	0.64	1.04	0.69
2.62	0.75	3.35	1.03						2.3	1.04529	2.14	0.91						3.17	0.87	2.3	1.13						2.86	0.34	2.81	0.55						2.36	0.8	1.69	2.65						1.32	1.85	1.6	0.76
2.12	1.18	2.89	1.09						3.33	0.24661	3.05	1.01						2.1	1.06	1.59	1.5						3.08	1.11	1.88	0.61						2.87	1	2.46	0.8						1.55	0.95	1.66	0.87
3.06	0.62	3.33	1.22						3.37	0.265023	1.97	0.6						1.8	1.24	2.57	0.9						1.86	0.7	2.42	1.02						2.47	1.13	2.35	0.89						1.35	1.51	1.09	0.71
3.06	0.32	3.23	1.1						4.33	1.44776	2.55	1.03						2.76	0.87	1.48	0.98						2.8	2.15	2.01	0.7						2.25	0.96	2.1	0.65						1.49	1.44	1.18	0.91
3.67	1.09	4.47	0.88						2.76	0.904797	1.77	1.01						1.93	1.51	2.44	0.96						3.25	0.66	1.84	0.68						2.5	0.1	1.71	2.53						1.58	0.94	1.71	1.12
2.13	1.21	3.52	0.43						4.11	0.314508	2.4	0.92						2.96	1.27	2.26	1.09						1.86	0.89	1.63	1.03						2.93	1.1	2.05	0.73						1.26	1.14	2.01	0.67
3.48	1.15	2.79	1.43						2.86	0.19665	2.41	1.05						2.09	1.51	1.72	0.47						1.65	0.85	2.08	0.94						2.35	0.24	2.83	0.75						1.6	1.41	1.14	0.93
3.76	1.22	2.86	1.8						4.24	1.07194	2.37	0.62						3.08	0.69	1.38	1.35						2.82	1	2.02	0.87						3.4	0.82	2.01	0.48						1.34	0.71	1.24	1.21
2.52	1.17	4.98	0.61						2.9	0.887171	2.09	0.8						2.48	0.7	1.57	0.81						1.85	0.3	1.38	0.66						2.26	1.06	1.78	1.24						1.74	0.75	1.35	1.34
3.04	0.23	3.22	1.15						3.68	0.346591	3.15	0.96						2.42	0.8	2.59	1.02						1.16	1.28	2.07	0.65						2.96	1.46	2.33	1.16						2.2	1.06	1.15	0.49
2.21	1.68	4.2	0.93						4.12	1.06434	2.73	1						1.7	0.25	2.98	1.63						2.16	1.41	2.39	0.6						1.72	0.1	1.67	0.56						2.06	1.43	1.35	0.96
2.99	0.54	3.78	0.86						2.18	2.07096	3.19	0.99						2.68	0.57	1.72	0.83						0.92	1.3	3.52	0.86						1.74	0.3	1.46	0.98						1.59	0.71	2.75	1.32
3.09	0.95	1.5	0.92						4.47	1.12249	3.51	0.86						2.16	0.76	2.67	1.28						1.37	0.33	2.92	0.88						1.11	0.98	2.36	0.84						1.2	1.66	1.68	1.49
3.8	0.25	2.09	0.95						2.37	0.830823	2.28	1.38						3.29	1.04	2.56	1.16						1.75	0.95	2.03	0.49						1.26	0.91	1.99	0.45						1.32	1.16	0.97	0.53
2.74	0.55	2.53	0.97						1.69	0.779683	2	0.79						3.35	0.65	2.33	1.13						1.84	2.12	1.59	1.25						1.66	1.25	1.59	0.84						1.02	1.68	0.97	1.19
3.62	0.37	2.83	0.86						2.84	1.06025	2.53	1.08						2.49	1.56	1.99	0.89						1.64	1.61	1.82	0.97						1.34	0.91	2.68	2.11						1.69	1.23	1.25	1.83
2.24	0.43	1.99	1.07						2.42	0.21517	1.81	0.72						3.01	0.31	2.42	0.96						2.03	1.84	1.74	1.22						1.75	0.72	2.13	0.68						2.09	1.51	1.6	0.74
3.65	1.17	3.06	0.86						2.17	0.43641	2.75	1.5						2.84	1.33	2.96	1.12						1.89	1.55	1.39	0.88						1	0.65	1.89	1.85						1.47	0.23	1.6	0.83
1.48	2.28	3.77	0.81						2.09	0.610787	2.31	1.02						3.16	0.37	1.65	0.48						1.47	0.41	1.38	0.83						2	0.67	2.12	1.31						1.38	2.41	1.71	0.76
3.48	1.74	3.91	0.63						2.75	0.824994	3.47	0.96						2.55	1.24	2.88	1.1						1.34	1.43	2.2	1.04						1.56	1.43	1.99	1.6						1.41	1.22	1.62	0.67
2.81	1.39	3.12	1.18						3.79	1.80382	2.82	0.8						1.92	0.22	2.54	1.31						1.78	1.36	2.06	0.63						1.69	0.42	3.23	1.03						2.4	0.66	1.26	1.03
2.98	1.12	3.69	0.7						3.31	1.50207	1.78	1.12						3.21	0.78	2.87	1.22						1.83	0.86	1.88	0.98						1.76	0.82	1.67	0.84						2.02	0.97	0.94	0.56
3.68	1.44	3.31	0.75						1.38	2.55184	3.52	0.75						2.71	1.66	2.2	1.21						1.23	0.26	1.81	0.75						2.53	0.15	2.42	0.58						1.42	1.16	1.8	0.43
3.05	1.56	1.81	2.21						2.07	1.62482	3.33	0.69						1.95	1.77	1.56	0.91						2.37	1.3	1.41	1.43						2.15	0.84	1.77	0.52						1.23	1	1.45	0.97
1.76	1.52	2.11	0.7						2.79	0.122673	2.78	0.97						2.17	0.34	2.59	0.96						1.1	1.76	1.23	0.48						1.81	1.37	1.48	0.74						1.8	0.83	1.37	0.54
2.43	0.15	2.94	1.32						2.28	0.956255	2.9	0.8						2.34	1.08	1.46	0.92						1.87	1.02	2.55	1.11						1.37	1.16	3.19	0.87						1.33	2.62	1.76	2.03
1.89	1.79	3.09	0.79						3.3	1.81203	2.62	1.76						2.18	1.28	3.46	1						1.81	1.14	2.67	1.53						1.87	1.24	1.65	1.67						1.31	1.52	1.82	0.82
2.4	0.44	4.3	0.65						1.73	1.43797	3.48	1.02						2.24	0.35	1.75	0.52						1.22	0.78	3.05	1.05						1.59	0.61	1.64	1.07						1.1	1.54	1.29	0.43
1.97	0.52	2.22	1.13						3.2	0.885193	1.98	0.8						1.62	0.2	2.66	1.14						1.19	0.95	2.54	0.8						2.2	0.96	2.55	0.96						1.14	1.35	1.94	0.8
2.05	0.75	2.82	1						2.91	0.52185	3.19	0.88						2.2	1.05	2.99	0.94						2.66	0.29	2.55	1.03						2.13	2.14	1.86	0.74						1.78	0.25	1.07	0.76
3.95	1	2.08	0.85						2.38	0.295571	1.95	0.99						3.04	0.76	1.78	1.94						1.24	1.17	1.65	1.27						2.73	1.05	2.28	0.62						1.19	2.81	0.91	0.94
2.51	0.69	3.48	1.07						3.03	0.433812	2.55	1.07						1.54	0.57	2.16	0.68						1.34	0.69	2.38	0.84						3.26	0.79	1.81	1.32						2.01	1.47	1.4	1.01
1.6	0.59	3.1	0.86						2.19	1.56962	2.43	0.99						4.55	1.49	2.27	1.08						2.27	0.89	2.06	0.79						1.45	0.55	2.18	0.6						0.97	1.66	1.6	0.54
1.68	2.03	1.89	0.62						2.88	0.065604	1.67	1.43						2.52	0.72	1.67	0.97						1.62	1.4	2.71	1.2						3.18	0.25	1.62	3.19						1.2	1.3	1.16	0.51
2.24	0.61	2.69	0.98						4.57	1.80961	2.22	0.53						2.03	1.52	1.77	0.77						1.36	0.47	2.29	0.99						2.72	1.22	1.68	1.21						0.78	1.6	1.31	0.79
2.77	0.72	2.42	0.85						3.81	2.13634	2.45	0.91						2.66	1.34	2.56	1.13						1.41	0.51	1.74	0.77						1.94	0.34	2.02	0.41						1.16	0.98	1.23	1.33
1.79	0.58	3.7	0.64						3.45	0.758576	3.46	1.05						3.04	0.37	2.77	0.93						1.98	1.8	3.95	1.05						1.43	0.84	2.01	1.34						1.48	1.37	1.33	0.93
2.19	0.92	3.19	1.13						1.86	2.3697	2.89	1.16						2.84	0.33	2.37	1.14						1.9	1.2	2.61	0.95						1.67	1.47	1.56	1.55						2.06	1.79	1.77	0.77
2.65	0.48	2.6	0.67						2.55	2.20838	1.95	0.43						2.89	1.6	2.3	1.03						0.96	1.47	2.57	0.83						1.8	0.91	1.81	0.82						1.02	0.99	1.19	0.81
2.52	0.3	2.71	1.34						2.59	0.500313	3.18	1.35						2.56	1.5	2.25	0.54						1.7	0.33	4.01	1.09						2.1	2.9	2.12	0.92						1.62	0.62	1.94	0.99
2.25	1.62	1.79	0.66						2.28	1.01482	3.51	0.96						2.57	1.69	1.58	1.4						1.27	0.91	2.68	0.8						2.83	1.48	1.45	1.34						1.71	0.56	1.56	1.01
3.92	0.73	2.7	1.37						1.75	0.222051	2.94	1.04						2.72	0.98	1.61	0.98						2.37	1.53	1.45	1.38						1.89	1.22	2.05	0.89						1.33	1.02	0.82	0.73
4.02	1.72	2.47	1.07						3.23	0.473534	2.15	0.7						2.73	1.39	1.43	0.96						2.21	1.41	1.96	0.36						1.87	0.05	2.51	2.57						1.03	0.53	1.69	0.81
3.68	1.57	4.77	0.89						5.23	1.08801	2.01	1.05						2.49	1.54	2.88	0.85						1.17	0.37	1.66	0.88						2.5	1.84	1.65	0.63						1.06	1.81	1.49	0.51
3.68	1.48	2.63	1						3.24	0.369453	2.41	1.11						2.45	1.63	1.41	0.66						0.94	3.83	1.33	0.79						1.72	0.18	2.24	0.43						1.46	0.54	1.26	0.84
2.63	0.63	3.06	0.71						4.62	1.48483	3.22	0.85						2.78	0.83	1.95	0.6						1.12	1.09	1.62	1.51						2.23	2.6	1.48	0.46						2.2	2.36	1.09	1.14
2.86	0.31	2.33	1.39						2.98	0.754111	2.37	0.92						1.27	1.29	1.54	1.61						1	1.05	2.32	0.61						2.19	0.2	1.84	0.54						1.79	0.83	1.56	0.48
2.69	0.92	2.02	0.73						2.86	0.268812	2.09	0.65						2.81	0.2	2.16	1.07						1.86	1.51	2.55	1.15						3.12	2.15	2.6	1.11						1.77	1.56	1.6	0.71
3.86	1.11	1.67	0.91						2.48	0.631641	1.93	0.49						2.06	2.12	3.08	1.02						1.53	1.38	1.89	1.11						3.01	1.35	2.28	0.86						1.64	1.05	1.47	0.88
2.46	1.18	2.23	0.99						3.25	0.173218	2	1.51						2.78	0.28	1.66	0.85						2.19	1.11	2.44	1.15						2.16	1.32	1.04	0.67						1.41	0.64	1.34	1.02
3.77	1.89	3	1.24						3.31	0.543108	2.3	0.84						5.32	3.86	2.09	0.78						1.98	1.48	1.83	0.96						2.71	0.74	1.94	1.62						1.35	1.35	1.36	1.29
2.68	0.92	2.57	1.4						3.71	1.29618	3.5	0.77						2.03	1.41	2.35	0.96						2.96	1.37	3.25	0.83						1.11	1.38	1.84	0.57						1.97	0.8	2.02	0.57
2.6	1.32	3.42	1.12						2.78	0.174315	3.14	0.82						2.51	0.68	1.61	0.93						1.63	0.58	3.03	0.64						1.99	1.45	1.23	0.89						1.25	1.14	1.63	0.69
2.64	0.26	2.7	1.52						2.94	0.652253	1.42	1.6						2.56	0.38	1.33	1.06						1.03	0.67	1.67	1.32						1.89	1.97	2.57	1.28						2.29	1.09	1.18	1.37
3.17	0.23	3.49	0.96						3.23	1.41991	1.91	0.52						2.3	1.51	2	1.09						1.59	0.29	1.5	0.88						2.58	1.33	1.55	1.45						1.16	2.92	1.65	0.89
3.25	0.34	3.26	0.72						4.48	1.36476	2.82	1.15						2.84	0.55	2.43	0.57						1.75	0.15	1.92	1.12						2.97	0.68	1.91	0.54						1.71	0.56	1.77	0.83
2.63	0.68	3.75	1.22						3.44	0.427253	1.85	1.21						1.99	1.4	2.27	1.4						1.83	1.86	1.52	1.02						2.15	0.27	1.73	1.04						1.26	1.35	1.15	1.24
2.62	0.49	3.23	1.71						3.85	0.44085	3.67	0.85						1.69	0.31	2.92	1.27						2.03	0.88	1.8	1.07						2.04	1.19	2.38	1.86						2.13	1.87	0.98	0.91
3.47	0.75	2.51	0.65						1.55	0.658523	2.68	0.64						3.05	1.02	2.75	1.11						2.49	1.08	2.29	0.9						1.64	0.89	2.18	1.11						1.63	1.52	3.04	0.67
3	0.26	4.31	1.06						2.12	1.30756	3.07	0.84						3.66	0.92	2.52	1.08						1.99	1.54	2.68	1.49						3.24	0.53	2.44	0.68						1.53	0.84	1.25	0.55
3	1.46	2.33	1.17						3.27	1.60563	1.79	1.08						1.81	0.52	2.64	0.95						1.68	0.37	1.6	0.61						2.92	0.85	1.39	0.89						1.3	2.38	1.94	1.79
3.88	1.17	3.46	0.81						2.44	0.244551	2.19	1.29						3.33	0.49	1.25	0.46						2.36	1.14	1.56	0.71						3.26	0.59	1.83	0.49						1.35	1.26	1.91	0.78
3.86	1.22	2.74	0.86						2.18	2.02036	3.71	1.2						2.42	1.43	1.85	1.02						2.46	1.26	2.27	0.64						2.54	2.17	1.96	0.54						1.69	0.16	1.32	1.12
2.1	1.1	3.05	0.81						1.48	1.23255	3.13	1.23						3.44	1.25	1.53	0.31						2.24	1.57	1.78	1.87						1.46	2.19	2.09	0.55						1.5	0.58	1.29	1.01
2.78	1.41	3.35	0.97						2.23	0.37107	1.97	0.82						2.5	1.21	1.52	0.82						1.92	1.38	2.41	1.06						2.05	1	1.61	2.07						0.97	0.86	1.06	0.76
3.08	0.16	3.27	0.68						1.31	1.73222	2.76	1.1						2.15	2.12	1.42	2.35						5.69	1	1.07	0.41						1.04	1.4	1.99	0.62						1.61	0.48	0.91	0.53
3.38	0.53	2.51	0.72						2.01	1.59218	3.23	1.3						2.72	0.71	2.67	1.55						1.36	0.57	1.86	1.36						2.22	0.1	2.3	1.15						1.71	1.4	1.76	1.68
3.31	0.71	4.43	0.64						1.63	1.9554	2.68	0.98						1.64	0.3	1.73	1.05						2.25	1.03	1.64	0.7						1.05	2.51	2.48	0.47						0.92	0.14	1.55	1.08
2.23	2.67	2.06	0.95						2.08	1.58048	2.14	0.72						2.26	1.51	1.69	1						2.11	1.28	2.68	1.2						2.27	0.91	1.71	1.07						2.12	0.86	1.67	1
3.08	0.2	2.91	1.65						1.24	0.296391	1.96	0.74						2.76	1.86	1.67	1.59						2.71	0.81	1.8	1.47						1.84	2.61	1.66	0.98						1.28	1.75	1.36	0.83
2.84	0.39	2.7	0.94						2.34	0.638926	1.98	0.79						1.43	1.03	2.01	1.05						2.45	1.57	2.05	0.9						2.09	1.26	2.08	1.05						2.61	1.47	1.76	1.21
3	0.23	2.24	1.21						3.55	0.863139	2.18	1.3						2.89	1.02	2.84	0.84						2.94	0.97	2.21	1.27						1.64	0.57	1.77	0.54						1.38	1.36	1.07	0.49
2.85	0.21	3.12	1.71						1.74	1.68735	2.59	1.18						1.74	0.26	1.99	0.4						1.8	0.44	2.51	0.91						1.74	1.3	1.41	0.57						1.14	0.63	0.79	1.19
1.99	1.55	3.09	0.87						2.03	1.57029	1.97	0.66						2.33	1.11	2.05	0.61						1.38	2.42	2.65	1.16						1.86	2.31	2.73	1.56						1.46	0.68	1.12	1.25
2.68	0.21	2.88	0.73						1.88	1.76103	3.75	0.79						1.75	0.15	2.35	1.1						2.87	1.67	2.24	1.2						1.19	0.32	1.82	0.52						1.53	0.36	1.18	1.44
3.01	0.55	3.87	0.95						2.01	1.33373	2.99	1.14						2.39	1.41	1.93	1.06						1.54	1.75	2.49	0.93						2.94	0.68	1.87	0.7						1.78	0.34	1.94	1
3.23	1.28	4.46	1						1.53	1.16894	2.76	0.94						2.32	1	1.97	1.36						2.17	1.01	2.84	1.13						1.09	1.43	2.04	0.59						1.08	0.9	1.29	0.49
3.61	1.75	3.33	1.45						2.71	0.320465	3.22	0.78						2.87	1.69	2.04	1.3						2.16	0.23	2.59	1.07						2.12	2.87	1.54	0.4						2.04	1.28	1.97	0.91
3.33	1.91	2.63	0.8						2.67	0.308839	2.71	1.3						2.89	1.06	2.3	0.55						2.06	0.41	2.99	0.87						1.25	0.44	2.59	1.97						1.3	0.73	1.58	0.49
3.98	1.44	2.32	1.68						2.97	0.655495	2.45	0.99						2.79	1.59	1.69	1.26						2.53	1.27	1.63	0.79						1.73	0.92	1.58	1.71						1.3	0.7	0.83	0.56
4.1	1.45	2.28	0.96						2.39	1.96761	2.51	1.42						3.08	0.34	2.87	0.75						1.55	1.05	3.04	1.17						2.64	0.95	1.3	1						1.54	0.74	1.03	0.66
2.16	1.72	2.52	1.53						1.88	1.06221	2.21	0.78						1.85	2.42	3.15	1.2						2.08	1.7	1.72	1.14						1.92	0.45	1.94	1.03						1.88	1.5	1.64	0.79
2.66	0.75	3.21	1.51						2.94	0.267688	2.15	0.68						3.56	0.22	2.62	1.17						1.96	0.32	2.07	0.41						1.86	2.22	1.79	0.85						1.64	1.23	1.27	0.83
3.34	0.95	2.2	1.22						2.24	0.829707	3.71	1.22						1.58	1.1	1.91	0.92						1.33	0.56	1.92	0.68						1.96	1.14	2.46	2.11						1.53	0.88	1.34	0.92
4.49	0.93	2.17	0.85						2.15	1.66561	2.47	1.23						1.99	1.33	2.49	0.97						4.01	0.72	2.16	2.56						1.91	1.92	1.77	0.48						2.25	1.63	2.09	1.24
3.23	0.37	2.32	0.8						1.86	1.07825	2.65	0.93						1.63	1.57	3.01	0.92						1.65	1.4	2.23	1.07						2.33	1.23	2.75	0.98						1.86	1.1	1.14	1.04
3.12	1.24	1.7	0.67						3.71	0.545385	2.7	0.91						1.35	0.31	1.9	1.15						1.92	0.08	2.86	0.84						1.68	0.32	1.49	0.69						1.57	0.58	1.98	0.52
4.21	2.01	3.11	1.08						3.68	1.38386	2.85	0.78						3.12	0.35	2.04	0.98						1.2	1.34	1.74	1.6						1.65	0.82	2.33	0.52						1.92	1.18	1.85	0.85
2.03	1.18	2.24	0.77						2.39	0.987084	2.12	0.84						2.42	0.57	3.19	0.97						1.12	0.22	1.98	1.02						1.52	0.42	2.67	0.87						1.98	1.08	1.51	1.33
4.24	0.91	1.76	0.4						3.56	1.32156	2.94	1.19						1.86	2.02	1.79	0.66						1.96	0.61	1.37	1.23						1.71	1.23	1.83	0.86						2.21	1.88	1.42	1.12
2.6	1.15	2.34	0.9						1.8	1.41493	3.36	1.78						2.58	0.72	2.54	0.99						1.27	0.8	1.82	1.1						2.38	0.82	2.51	0.99						1.49	0.58	0.99	1.25
3.13	0.34	1.98	1.02						3.62	1.38559	3.66	1.24						1.41	0.27	2.09	0.93						4.14	0.41	2.83	1.62						1.29	0.49	1.6	1.22						1.4	0.39	1.63	0.94
2.77	0.13	2.04	1.12						3.04	0.341444	3.42	0.71						2.94	0.21	2.51	0.44						3.27	1.17	1.47	1.34						1.38	0.51	2.75	1.6						1.78	0.3	1.5	0.93
2.32	0.02	2.3	0.82						2.51	0.865858	3.06	1.12						2.4	0.59	1.87	0.9						1.93	0.15	2.44	1.15						1.84	0.67	1.34	1.05						1.22	0.65	1.45	0.74
3.51	1.11	2.26	1.18						2.91	1.32469	4.03	0.84						1.46	0.36	2.04	0.78						1.51	0.87	1.36	1.71						1.91	1.66	1.79	0.98						1.25	0.7	1.7	1.26
3.7	1.18	2.82	0.99						2.48	0.944755	3.07	0.68						1.54	1.15	2.38	1.57						1.14	2.01	2.42	0.93						2.19	1.24	1.46	0.45						1.61	1.13	1.06	1.82
2.98	0.65	3.64	0.82						3.93	0.408073	1.84	1.02						1.81	2.11	2.1	1.05						1.42	1.6	2.15	1.06						2.28	1.42	1.35	0.47						1.25	1.17	1.18	0.58
3.82	1.58	1.92	0.57						3.18	0.284671	3.5	0.76						3.62	0.7	1.65	0.83						2.86	0.91	1.9	1.05						1.62	0.74	1.12	0.37						1.09	1.3	1.51	0.88
3.81	1.21	3.33	0.92						2.81	0.387078	1.81	1.16						2.26	0.9	2.01	0.6						3.33	1.2	2.27	0.67						2.6	0.62	1.77	0.61						1.79	0.54	0.9	1.19
1.99	0.57	3.67	0.58						1.8	2.72251	1.96	1.12						7.3	0.52	3.13	0.97						1.87	0.07	1.86	1.08						2.89	1.8	1.73	0.84						1.58	1.25	1.22	0.8
2.25	0.34	3.73	0.83						2.85	1.75187	3.31	0.83						1.65	0.29	1.9	1.66						1.45	0.74	3.07	1.28						1.59	2.15	2.16	0.71						1.9	0.26	1.86	0.82
2.68	1.83	2.5	0.76						2.56	1.49549	2.04	1.79						3.05	0.43	1.7	1.44						1.29	0.97	1.63	1.3						2.21	0.83	3.12	1.17						1.19	1.29	1.29	0.79
3.29	1.9	2.2	1.34						3.22	0.171712	1.98	1.12						3.51	0.43	2.89	1.4						2.64	1.33	1.67	1.45						2.08	0.35	2.43	0.77						1.36	0.65	1.2	0.61
3	1.49	2.21	1.12						3	1.51429	3.76	0.84						1.95	2.75	2.58	1.1						2.29	1.03	1.59	0.74						2.14	1.85	2.62	0.51						1.4	0.47	1.47	1.04
2.82	0.86	3.49	1.18						3.55	0.150025	2.07	0.9						2.39	1.12	2.37	1.02						1.79	0.5	1.51	1.12						1.95	0.74	2.72	0.67						1.23	0.89	1.25	0.81
4	0.65	3.31	0.58						4.35	0.553638	2.85	1.71						1.55	0.37	1.36	1.38						2.78	1.85	1.15	0.64						3.19	0.93	1.8	0.79						0.9	0.71	0.97	0.71
1.65	1.58	1.8	1.28						2.21	1.02617	3.38	0.98						2.85	0.74	2.03	1.12						2.17	1.35	2.57	0.93						1.78	0.13	2.92	1.66						2.06	0.97	1.18	0.83
2.55	0.53	1.91	1.98						3.79	0.637905	2.78	0.82						2.3	1.13	1.94	1.02						2.43	1.48	2.46	0.94						3.28	0.89	1.39	1.49						1.1	1.32	1.29	1.22
2.68	0.7	2.44	1.18						1.99	1.53548	1.88	1.04						1.71	0.18	1.66	1.19						2.72	1.18	2.8	1						2.9	1.25	1.44	0.65						1.28	2.08	0.85	1.22
2.7	0.85	2.28	1.02						1.9	1.68401	2.8	1.28						2.8	1.21	2.59	1.26						2.37	1.27	2.01	1.34						1.54	0.45	2.82	0.55						1.2	1.28	1.37	1.04
2.03	1.17	2.01	0.97						5.23	0.713097	2.31	0.98						3.1	0.16	1.75	1.72						1.72	0.65	2.32	1.26						2.59	0.83	2.05	1.07						1.21	1.58	1.69	1.58
2.44	1.07	3.54	0.87						4.21	0.957603	3.19	0.52						4.31	0.89	2.72	0.92						1.76	0.19	2.92	0.77						1.6	0.76	2.91	0.87						2.53	1.04	1.11	0.83
2.65	2.97	2.52	0.79						3.53	0.665884	2.53	0.91						2.07	1.69	2.52	1.09						2.38	1.04	1.66	1.6						2.22	1.02	2.04	0.77						2.03	1.29	1.53	1.09
1.94	1.92	2.15	0.98						3.54	0.632288	3.16	0.86						1.96	0.75	2.62	1.1						2.3	1.38	1.99	1.17						3.45	0.56	3.07	1.01						2.17	1.5	1.63	0.92
4.57	0.82	2.3	1.15						2.97	0.283935	3.42	1.39						2.11	1.29	1.9	1.21						2.07	1.07	2.34	0.7						1.52	0.5	2.98	1.13						1.73	0.15	1.36	1.26
3.74	1.05	4.49	0.53						2.9	1.81049	2.86	0.7						3.2	1.1	2.61	0.99						2.37	1.17	2.26	0.67						1.75	0.37	2.49	0.9						1.52	0.96	1.18	1.38
1.91	1.41	2.03	0.6						4.86	1.06924	3.35	0.97						1.69	0.67	2.47	1.15						2.06	1.37	2.47	1.4						2.02	1.19	1.58	1.09						1.24	0.66	1.58	0.84
2.3	1.29	2.12	0.69						2.11	0.55967	3.56	0.57						2.19	1.36	2.79	1.21						2.03	1.6	2.89	1.02						2.41	1.26	1.88	0.66						1.24	1.47	0.89	0.81
2.42	0.52	3.88	1.01						3.64	0.683399	3.71	0.57						5.04	1.06	2.46	1.19						2.17	1.78	2.1	1.32						2.85	0.71	2.41	0.67						1.04	1.12	1.24	0.9
2.2	1.71	3.96	0.48						2.8	1.21788	2.16	0.82						2.92	0.73	2.79	0.66						1.52	0.89	2.82	0.7						1.61	1.11	1.49	1.42						1.61	0.13	1.3	1.77
2.25	0.53	3.81	1.09						2.97	0.148831	2.55	1.06						3.18	0.97	3.72	1.18						1.46	0.75	3.2	1.28						2.66	1	2.37	1.08						1.18	0.67	1.27	1.29
2.34	1.31	2.67	1.04						2.34	0.192944	2.7	1.45						2.94	0.34	1.79	1.72						1.94	0.12	3.13	1.09						3.11	1.27	2.41	2.35						1.88	1.32	1.33	0.94
1.77	2.47	3.17	1.11						3.04	1.42715	2.87	1.23						1.97	2.5	1.89	0.66						2.79	1.19	1.68	1.4						3.43	1.1	1.43	2.01						1.22	0.55	1.26	1.76
3.24	0.59	4.27	0.59						2.7	0.328745	3.55	1.2						1.68	0.88	3.59	0.74						2.94	1.34	5.53	0.83						1.17	0.77	2.74	0.92						2.1	1.34	1.3	0.79
2.02	1.92	3.17	1.6						2.28	0.206811	2.51	1.62						2.08	1.67	2.33	0.98						2.85	0.7	2.45	0.95						1.84	0.62	1.94	0.64						1.15	1.44	1.31	0.81
3.43	1.74	2.88	1.29						3.18	1.20138	3.84	1.23						1.9	0.87	1.86	0.8						1.36	0.97	1.87	0.84						1.21	1.72	1.92	0.62						1.75	0.19	1.69	1.35
2.62	0.69	4.28	0.8						1.92	1.24283	2.9	1.21						2.42	2.36	2.32	0.73						3.21	1.37	2.54	0.72						1.73	0.8	1.93	0.58						1.41	2.72	1.83	0.64
3.42	1.83	3.31	0.94						2.17	1.4346	2.96	0.96						3.44	1.73	2.45	1.17						1.23	0.34	2.51	1.16						1.3	2.01	3.13	0.69						1.22	0.8	1.61	2.05
2.97	0.57	4.48	0.74						2.01	1.50242	3.04	0.85						2.82	1.55	2.16	1.11						1.34	0.69	2.32	0.96						1.16	1.38	2.52	0.68						1.21	0.66	1.73	1
3.16	0.56	3.89	1.54						1.64	1.22689	4	0.67						2.9	0.69	2.59	0.66						1.26	1.35	1.66	1.59						1.69	1.6	2.18	1.12						1	0.89	1.62	1.12
3.28	0.52	2.67	1.08						2.24	0.973017	2.88	1.21						1.25	0.37	2.59	1.37						1.31	1.53	1.87	0.54						1.26	0.57	1.59	1.03						1.74	0.19	1.01	1.57
3.07	1.14	3.01	0.96						2.11	1.81348	2.19	1.3						2.79	1.48	1.59	0.86						1.32	0.26	2	1.85						1.29	0.99	2.04	0.66						1.08	0.72	1.05	0.87
4.27	1.11	3.34	1.25						3.51	1.3847	2.94	1.22						2.42	1.43	1.95	0.62						1.52	1.44	3.24	1.09						2.21	1.92	1.75	1.29						1.35	1.1	1.21	0.25
2.72	1.3	2.82	0.64						3.73	1.07292	3.83	0.79						1.5	0.96	2	2.12						1.31	1.57	3.05	1.05						2.01	1.09	2.2	0.6						1.74	0.8	1	0.79
2.95	0.69	3.38	0.88						1.69	0.894252	2.39	1.03						2.59	1.34	2.68	1.15						1.68	1.46	3.56	1.03						2.09	1.65	2.33	0.99						1.67	0.92	1.49	1.21
3.48	1.05	3.17	1.3						3.03	0.990315	2.09	0.92						1.96	2.19	1.83	1.2						1.85	1.32	1.56	0.71						2.43	0.5	1.7	0.63						1.55	0.11	1.28	1.42
3.05	0.17	3.12	0.97						2.66	1.71511	1.54	0.74						2.32	2.08	2.55	1.66						1.51	1.48	2.23	0.84						2.35	0.96	1.72	0.59						1.17	1.05	1.76	1.43
3.04	0.33	3.28	0.85						2.36	1.262	3.26	1.08						3.01	0.91	2.27	0.79						2.1	0.96	1.61	1.2						2.47	2.04	3.08	0.68						1.9	0.28	1.73	1.5
2.75	0.3	3.61	0.99						3.34	0.72661	1.94	0.58						1.72	1.01	1.61	0.95						0.94	0.56	1.82	1.53						0.98	1.01	3.15	2.01						1.81	0.33	1.14	0.75
3.66	2	4.24	0.84						2.79	0.141625	1.8	0.62						3.33	0.8	1.82	1.38						1.66	1.32	1.75	0.83						1.65	0.49	3.19	0.63						1.84	1.13	0.95	0.84
3.57	1.51	2.53	0.89						4.08	0.785473	1.86	0.91						1.77	1.7	1.87	1.18						1.79	1.24	1.16	0.99						1.3	0.66	2.33	0.49						2.2	1.44	2.02	1.01
3.5	1.17	2.14	1.2						3.17	0.768426	3.13	0.93						3.04	0.3	1.45	0.8						1.09	1.8	1.58	1.2						3	0.53	2.72	2.6						0.95	1.18	1.12	1.88
3.62	1.36	2.87	1.02						2.57	1.92285	2.91	0.88						3.08	0.42	2.02	1.1						1.9	1.7	1.49	1.02						1.5	0.26	2	2.17						1.43	0.89	1.73	0.62
3.47	1.71	3.06	1.11						2.2	1.81712	2.42	0.92						3.34	0.96	2.52	0.64						1.41	0.25	1.27	1.03						2.87	0.35	1.84	1.01						1.58	0.15	1.12	1.01
4.38	1.78	4.85	0.99						2.38	2.27003	1.95	1.12						2.42	0.87	2.85	0.65						2.69	1.56	1.35	0.79						2.09	1.04	1.56	1.64						1.51	0.55	0.98	0.56
3.4	1.91	2.56	1.42						2.8	0.585376	3.46	0.92						1.83	0.13	2.2	0.69						2.3	1.03	1.26	1.63						2.64	1.69	1.8	1.8						1.2	1.54	1.07	0.74
1.88	1.52	4.12	0.96						2.57	1.01647	2.03	1.14						1.16	1.13	1.73	0.8						1.97	1.57	1.72	1.07						1.68	1.51	1.91	0.72						1.34	1.25	1.22	1.07
1.84	1.13	4.02	0.73						3.8	0.851102	1.9	1.19						2.12	0.85	2.04	0.71						1.52	0.27	2.05	0.81						2.33	1.51	2.62	0.81						1.71	0.26	1.51	1.34
2.12	1.36	3.28	1.43						3.8	0.484608	2.71	1.14						2.19	1.85	2.14	0.97						1.9	0.96	2.71	1.22						2.17	1.92	1.78	0.55						1.63	0.42	1.71	0.76
3.12	0.34	3.57	1.27						2.13	0.627473	1.76	0.72						2.44	1.51	2.11	0.9						1	1.63	1.47	1.26						2.35	1.04	1.91	1.04						1.32	1.5	2.09	1.22
3.1	0.67	2.95	1.03						3.68	0.125186	3.24	1.15						3.53	0.67	1.92	1.31						2.07	1.35	1.74	0.67						2.74	0.95	2.15	2.14						1.54	0.15	1.31	0.77
2.55	0.79	2.48	0.94						2.91	0.291985	2.24	0.85						2.75	1.09	1.36	1.06						4.8	0.81	1.55	0.93						2.74	0.92	1.99	0.58						1.38	1.5	1.3	0.97
3.95	0.52	3.21	0.8						2.77	1.1085	2.61	1.03						2.97	1.27	2.23	0.76						1.25	1	1.45	1.25						2.4	1.54	1.51	0.39						1.82	0.61	1.88	1.17
3.03	0.34	4.07	0.83						2.78	0.89223	1.79	3.05						1.99	1.2	2.97	0.74						1.92	1.54	1.2	0.74						3.09	0.89	1.59	2.63						1.28	1.25	1.29	1.8
1.77	0.22	4.34	0.94						4.92	0.880379	2.19	0.56						2.08	0.33	2.47	1.23						1.88	0.76	1.27	0.93						2.51	1.14	2.42	0.5						1.85	1.87	1.23	0.53
3.26	0.47	5.2	1.33						2.52	1.42282	2.61	0.88						3.76	0.27	2.13	1						1.7	0.15	1.56	0.88						2.85	1.67	2.67	0.94						1.57	0.42	1.15	0.79
3.94	1.12	3.46	0.64						2.99	1.5396	2.82	1.57						3.03	0.34	1.53	1.1						1.77	0.92	2.29	1.13						2.47	1.57	2.26	0.87						1.76	0.89	1.95	0.74
5.07	0.94	3.02	1.24						3.21	0.193355	2.27	0.54						2.18	1.62	1.97	0.59						2.54	1.37	2.35	1.57						1.5	0.79	2.66	2.45						1.47	1.16	1.52	0.75
3.5	1.52	3.8	0.98						3.34	0.99966	2.88	0.97						3.11	0.58	2.04	0.83						1.8	1.47	1.64	0.84						1.94	0.16	2.13	0.82						1.74	0.35	1.28	1.61
2.52	1.92	3.14	0.99						2.78	0.629141	2.56	2.16						1.87	1.68	2.3	1.01						1.35	0.41	1.56	1.01						3.41	0.23	1.84	0.64						1.11	1.24	1.48	0.66
2.36	1.29	3.76	1.27						3.96	0.754975	1.89	0.92						1.84	2.24	2.66	0.79						1.89	2.02	1.65	0.6						2.66	0.97	2.32	0.92						1.26	0.93	1.58	0.55
2.75	1.01	4.24	1.33						3.84	0.817519	2.75	2.29						1.78	0.11	1.5	0.45						1.38	0.89	2.24	0.99						2.24	1.3	2.4	0.49						1.98	1.42	1.49	0.85
3.46	0.69	3.9	0.93						3.36	0.234921	2.93	0.75						3.11	0.59	2.78	1.24						1.15	1.51	3	1.41						2.03	0.74	2.74	1.15						1.34	1.31	1.39	1.46
3.53	0.35	3.5	1.3						2.66	1.50987	3.46	0.88						1.07	0.32	2.26	1.07						2.45	0.82	1.9	0.88						2.52	1.39	3	0.63						1.33	0.73	1.54	1.07
3.72	0.92	2.78	0.98						3.92	0.168225	2.71	1.13						1.74	2.25	3.33	0.9						0.98	1.04	2.73	1.08						1.95	0.85	2.24	1.37						1.69	0.34	1.71	0.86
3.26	1.64	3.02	1.04						2.29	1.50365	2.94	1.09						1.69	1.84	2.03	0.5						2.89	0.78	1.8	0.91						2.83	0.9	1.99	0.64						1.72	0.73	1.42	1.81
4.4	1.11	3.61	1.16						2.35	0.632853	2.6	1.48						2.3	0.73	2.33	1.33						1.18	1.29	2.27	1.11						2.09	1.52	2.29	0.72						1.54	0.43	1.32	0.8
3.13	0.6	1.94	1.15						2.6	0.783806	2.95	1.42						1.48	1.53	2.03	1.34						2.07	1.36	2.92	1.22						2.17	0.93	2.49	0.53						1.08	2.22	1.33	0.99
2.23	0.18	2.63	0.68						4.98	1.41095	2.56	0.76						1.22	0.52	2.67	0.87						1.59	0.14	2.89	1.15						2.74	0.51	2.32	0.88						1.33	1.33	1.36	0.69
3.1	1.3	2.28	1.14						4.15	0.473684	2.23	1.02						2.44	1.13	1.88	0.91						1.79	2.03	2.23	0.89						2.33	1.09	1.71	0.74						1.14	0.48	1.36	1.19
2.44	0.23	2.25	1.06						2.26	1.33317	2.51	1.15						2	0.51	2.89	1.4						1.99	0.89	2.48	0.85						1.56	2.87	2.03	0.84						1.45	0.96	1.98	1.98
3.34	1.58	2.1	0.81						3.1	0.216287	2.27	0.55						1.97	2.08	2	0.67						2.27	0.93	1.55	0.62						2.42	1.3	2.34	0.67						1.72	1.88	1.65	1.08
2.28	0.45	2.41	1.57						3.78	1.26856	3.57	0.67						2.73	0.87	2.56	0.61						2.04	1.24	2.44	1.3						3.12	0.96	1.77	0.64						2.22	1.63	1.59	0.75
3.08	0.95	1.7	1.12						3.78	1.5393	3.32	1.26						2.87	0.7	2.51	1.35						1.35	0.62	1.92	1.2						1.97	0.27	1.56	0.74						1.79	0.72	1.32	1.03
2.56	0.79	1.99	0.94						2.14	1.4384	3.12	1.11						3.17	0.93	1.85	0.73						2.53	1.51	2.52	0.79						3.47	1.1	2.05	1.17						1.06	2.93	1.22	1.45
2.51	1.12	1.55	1						3.29	0.412039	3.34	1.05						3.21	0.58	1.77	1.11						1.5	0.13	2.41	1.35						3.38	0.77	1.38	0.12						1.32	0.93	1.3	0.67
1.78	1.68	2.36	1.59						2.54	0.741594	2.45	0.99						1.7	1.8	2.02	1.43						1.74	1.17	1.77	1.31						1.71	0.12	2.46	1.14						1.29	0.37	1.35	0.56
2.82	0.79	2.24	0.99						3.6	1.23026	2.69	1.61						1.49	0.28	2.17	0.79						1.87	0.29	3.48	1.05						3.09	0.57	2.24	1.61						1.6	0.49	1.4	1.47
1.73	1.47	4.29	1.07						3.52	0.229114	2.08	0.9						2.9	1.46	2.25	1.04						1.93	2.38	2.21	0.51						2.41	0.92	1.87	1.18						1.43	1.65	1.2	1.46
1.99	1.18	1.86	0.48						1.82	0.333498	2.91	0.9						3.03	1.22	2.11	0.74						1.76	0.92	2.66	0.58						3.16	1.84	1.62	0.91						0.78	2.15	1.77	0.78
2.6	0.24	2.75	1.18						2.08	1.18013	3.08	0.69						2.27	1.73	1.91	0.98						1.99	0.48	3.38	1.27						1.89	0.66	2.28	1.07						0.98	0.36	1.17	1.2
2.04	1.08	3.9	0.85						1.86	0.943497	2.26	0.78						2.62	1.3	1.7	1.24						1.41	0.75	2.38	1.17						1.41	0.78	3.01	2.12						1.46	0.35	1.64	1.05
1.73	2.67	2.04	1.36						2.92	0.664035	2.33	1.01						1.63	0.4	3.32	0.95						2.09	0.73	1.77	0.67						2.3	0.86	2.67	1.09						1.4	1.13	1.14	2.05
2.7	0.25	4.31	0.87						2.13	0.452526	2.31	0.76						3.58	0.7	1.61	0.74						1.54	0.62	1.67	0.98						2.1	1.2	2.68	1.02						1.89	0.39	1.92	0.82
2.38	0.82	3.07	1.17						2.95	1.15405	2.81	0.77						2.43	1.27	2.06	0.73						2.28	1.22	2.59	1.05						2.25	1.04	1.88	0.62						1.89	1.81	3.96	0.74
3.52	1.42	2.43	1						2.93	1.06807	3.23	2.31						1.94	0.81	2.15	1.16						2.26	1.42	3.16	1.17						1.34	0.91	1.58	1.2						1.23	1.58	1.49	1.25
2.15	2.48	2.7	1.17						1.89	1.86497	2.66	1.21						3.47	0.19	2	0.81						1.6	2.42	2.35	0.93						1.52	2.53	2.26	1						1.75	0.85	2.08	1.76
4.08	2.24	2.26	0.88						2.12	0.682972	2.83	1.22						1.74	0.52	2.18	1.22						2.27	1.25	2.11	0.74						3.1	0.75	2.51	0.61						1.59	1.09	1.56	0.76
2.95	0.18	1.74	1.89						4.19	1.2994	3.19	0.55						2.64	1.37	2.74	0.74						1.99	0.2	2.15	0.86						1.34	2.05	2.17	0.49						1.36	0.68	0.71	1.62
5.08	0.72	3.24	1.21						1.91	1.13892	3.32	0.83						3.1	0.61	2.11	1.2						1.24	0.45	2.3	1.12						2	3.43	1.44	0.39						1.17	0.98	1.58	0.95
2.86	0.51	2.47	1.28						1.85	1.41012	2.96	1.13						3.17	0.52	2.66	0.76						1.45	0.09	1.23	1.18						1.71	1.65	1.31	2.1						1.73	0.42	1.48	1.02
2.53	1.02	3.23	1.28						3.76	1.62284	2.85	1.02						3.04	1.05	2.54	1.05						1.98	1.55	1.67	0.55						3.28	1.15	1.77	0.93						1.86	0.12	1.51	1.16
2.8	0.35	1.83	1.08						2.56	0.336363	3.05	0.88						2.58	0.02	1.42	1.02						1.41	0.3	2.42	1.03						1.91	1.39	1.38	0.71						2.25	3.07	1.52	1.57
2.67	0.32	3.35	1.15						2.85	0.592923	2.89	0.93						3.55	0.44	2.11	0.93						1.48	1.36	2.05	1.21						1.33	0.58	1.39	1.44						1.89	0.98	1.02	1.56
2.54	1.63	3.67	0.79						2.65	0.210542	3.55	0.75						3.77	0.25	2.94	1.29						2.54	1.08	1.99	0.97						2.21	1.12	2.26	1.03						1.14	1.05	1.18	1.33
2.62	1.11	3.27	1.24						2.79	0.3007	3.46	0.8						3.16	0.76	2.23	1.02						2.26	0.74	1.66	0.68						3.22	0.22	2.36	0.51						1.01	1.08	1.1	0.52
2.77	0.65	3.46	0.46						3.44	0.374781	1.6	0.58						4.08	0.93	2.17	1.35						1.68	0.11	1.29	1.54						1.12	1.01	2.75	0.8						1.22	1.31	1.51	0.69
3.44	0.33	2.77	1.44						1.88	1.04709	2.85	0.74						3.09	1.04	2.32	1.58						2.79	1.21	1.43	1.33						1.56	0.9	2.31	0.53						1.52	0.48	1.13	0.8
3.95	0.96	4.04	0.49						1.97	1.9197	2.19	1.23						2.37	0.83	2.56	0.47						1.19	0.56	1.63	0.99						2.01	1.24	2.43	0.81						1.65	1.63	1.34	1.06
3.96	1.9	2.85	0.45						3.64	1.29581	1.75	0.75						3.46	0.57	2.57	0.9						2.4	1.05	2.47	0.89						3.28	1.19	1.41	0.67						1.5	1.38	1.64	1.39
3.47	0.37	2.34	1.17						2.28	0.550953	2.2	0.72						2.95	1.03	1.75	0.92						1.8	0.83	2.37	1.19						1.41	1.2	2.75	0.9						1.3	1.26	1.73	0.63
3.73	1.27	3.61	0.99						2.27	1.50245	2.76	1.12						2.3	0.6	2.32	0.69						1.87	0.76	1.88	0.89						1.61	1.41	1.58	0.57						1.33	2.1	1.58	0.72
4.1	1.25	3.57	1.07						4.09	1.0132	1.89	1.33						2.84	1.4	2.31	1.28						1.94	1.78	2.22	0.8						1.79	0.49	2.26	0.66						1.36	1.02	1.55	1.23
2.59	0.13	2.54	1.3						2.96	1.26395	2.79	1.05						1.94	0.09	2.84	1.3						1.84	0.28	1.73	1.18						1.98	1.73	1.64	1.76						1.33	1.54	1.03	1.79
2.7	1.01	2.2	1.16						1.96	0.929554	2.48	0.75						2.5	0.81	1.67	0.85						1.23	0.68	3.19	1.03						1.84	1.95	2.47	1.04						1.55	0.38	1.02	2.06
1.99	2.61	3.47	1.08						2.96	0.168816	2.09	0.77						2.85	0.5	2.43	1.39						1.75	0.15	2.09	0.73						2.16	1.22	1.8	2.08						1.45	0.85	1.69	0.69
5.57	1.31	2.95	0.72						4.67	1.22883	1.86	0.86						1.68	1.84	2.14	0.85						1.34	1.71	4.68	0.69						2.55	0.81	1.81	0.93						1.1	2.09	1.6	0.97
1.74	1	2.16	0.18						3.33	0.218563	2.54	1.08						1.66	0.24	1.89	0.58						1.34	0.75	1.45	0.64						1.86	0.91	2.55	0.94						2.22	1.03	0.93	2.16
2.14	1.59	2.55	0.9						2.97	0.985498	3.21	0.7						1.93	0.97	2.9	0.54						1.76	0.64	2.59	1.02						1.45	0.53	2.13	0.54						1.15	1.3	0.85	1.11
3.25	0.4	3.46	0.62						3.27	0.252723	1.74	0.75						3.3	1.32	2.05	0.82						1.48	0.75	1.32	0.64						1.54	1.05	2.44	0.6						1.8	0.37	1.68	1.33
3.8	1.77	2.51	0.65						2.52	1.69819	2.09	0.61						3.01	0.61	1.74	1.12						2.27	1.6	3.31	0.89						1.55	0.46	2.52	0.76						1.24	0.63	1.46	1.35
3.7	0.74	2.54	0.58						3.87	1.1601	3.92	0.98						2.11	0.32	2.34	0.77						2.79	1.12	1.59	1.41						2.74	0.82	1.52	0.84						1.98	1.67	1.67	0.94
1.97	0.67	3.28	1.24						3.08	0.948032	3.65	0.67						1.93	1.69	2.75	0.9						2.19	0.31	2.13	0.9						3.02	0.24	1.9	2.03						1.51	1.24	1.92	1.09
1.83	1.15	2.04	0.46						5.04	0.91812	2.1	0.95						2.66	1.36	2.68	1.27						1.61	0.43	3.21	1.18						2.28	1.12	3.87	2.12						1.89	1.59	1.48	0.85
3.01	1.07	3.05	1						4.27	2.28909	1.87	1.04						1.82	0.41	2.71	0.98						2.25	0.28	3.08	0.82						2.79	1.46	2.29	0.59						1.82	0.16	1.69	0.72
1.85	1.59	3.41	0.89						2.43	0.929129	3.25	1.1						2.58	0.91	2.16	0.73						1.58	0.55	2.93	0.63						2.45	1.57	1.65	0.66						1.64	0.23	0.95	0.9
2.41	0.88	3.32	0.83						3.39	0.196304	5.62	1.15						2.95	0.95	2.74	0.84						2.6	0.29	1.77	0.94						3.32	0.19	1.88	0.9						1.9	0.69	1.08	0.91
2.5	0.7	2.71	1.13						3.42	0.537847	2.67	0.99						1.71	0.38	2.7	1.19						1.24	2.22	2.45	0.68						2.57	0.78	1.9	1.92						1.13	1.1	1.35	1.67
2.52	0.98	4.51	0.71						2.57	1.22897	2.24	0.79						2.84	1	3.33	0.71						1.3	0.55	2.7	0.76						1.23	1.37	3.07	0.93						1.99	0.49	1.35	0.61
2.76	0.61	3.12	1.23						1.88	1.80967	4.03	1.13						2.45	1.13	1.54	1.38						2.1	0.24	1.78	0.51						2.29	0.98	2.32	1.17						1.14	1.63	1.06	0.76
5.47	0.58	3.24	1.2						2.96	0.809836	2.8	1.61						2.37	1.05	2.42	1.13						2.02	0.44	2.46	0.7						2.11	0.32	1.74	1.22						1.16	1	1.1	0.76
2.15	1.53	4.62	1.14						3.17	0.815633	3.21	1.09						2.65	1.24	2.72	0.59						3.11	0.66	2.88	1.08						2.9	0.36	2.38	2.13						1.82	0.09	1.39	1.6
3.8	1.73	2.21	1.18						3.14	0.192198	3.49	1.31						3.06	1.99	2.59	1.33						1.48	1.55	1.85	1.48						3	0.49	1.9	1.58						1.06	1.06	1.9	1.07
3.57	0.9	2.17	1.46						2.85	1.05344	3.37	1.01						3.2	0.25	3.07	0.87						1.74	0.1	1.58	0.72						1.77	0.35	1.8	0.62						4.4	0.75	1.19	0.8
3.86	1.51	3.02	1.27						5.16	1.32214	3.24	1.33						1.5	0.76	1.91	0.98						3.62	0.83	1.52	0.51						2.46	1.46	1.92	1.15						1.22	1.22	1.57	0.58
2.41	1.46	3.82	1.26						3.57	1.53905	3.19	0.83						1.07	1.39	1.58	0.79						3.1	0.94	1.21	1.19						3.42	0.2	2.13	0.71						1.71	0.14	3.43	0.38
3.34	0.54	2.16	1.26						2.23	1.33436	2.17	1						2.46	0.23	1.56	0.96						1.52	1.67	1.36	1.15						2.48	0.75	2.24	1.9						2.21	1.54	1.74	1.39
2.56	1.25	3.7	1.38						2.52	1.2333	3.15	1.09						1.56	0.37	2.59	1.18						2.21	1.12	1.5	0.93						3.54	0.64	1.72	1.15						1.67	0.39	0.98	0.76
3.47	0.87	2.58	1.9						3.48	1.47475	3.63	0.94						2.8	0.14	1.73	0.86						2.25	0.15	2.07	1.02						2.91	0.87	3.48	0.92						1.5	0.5	1.53	0.64
3.26	1.17	4.12	0.57						2.04	1.65604	2.06	2.05						3.2	0.36	2.98	1.25						2.16	1.67	1.74	0.89						3.02	1.12	2.28	0.65						0.93	1.64	1.5	0.85
2.42	0.46	4.4	1.1						2.08	1.35428	2.68	2.32						2.14	1.01	3.05	1.06						1.44	0.09	2.2	0.99						1.98	2.51	2.67	0.78						1.85	0.77	1.2	0.71
2.29	1.06	2.26	0.95						1.88	0.690569	8.34	0.51						1.96	1.19	2.92	1.35						1.78	0.11	1.99	0.65						2.04	0.66	1.56	0.55						1.21	1.06	1.52	1.67
2.45	0.36	3.57	1.3						1.62	1.46368	2.8	1.12						1.87	1.05	1.96	1.94						2.28	1.13	2.46	1.13						2.95	1	1.88	0.35						1	1.22	1.75	2.13
2.83	0.75	4.63	0.97						2.56	0.196391	2.34	0.87						1.17	0.49	2.33	0.34						1.99	0.4	1.51	1.21						2.56	0.75	1.96	0.83						1.52	0.56	1.96	0.8
3.39	1.1	3.56	0.75						2.62	0.713242	3.16	1.29						2.68	1.31	2.19	0.71						2.17	1.07	0.91	2.6						2.31	1.26	1.6	0.79						0.97	0.99	1.76	0.85
2.61	0.14	2.35	1.31						2.04	1.18492	2.23	0.49						1.65	1.11	1.96	0.95						1.56	0.78	0.98	1.11						2.62	1.14	1.98	1.48						1.57	0.14	1.54	0.86
4.46	1.19	2.1	1.27						3.06	1.06948	2.5	1						2.23	1.31	2.52	1.31						1.39	1.33	2.02	0.78						1.84	0.67	2.19	1.05						1.26	1.95	1.34	0.52
1.88	0.78	2.73	1.1						2.12	1.67085	1.94	0.7						2.65	0.65	3.35	1.39						2.21	0.19	3.21	1.08						3.31	0.49	1.74	0.59						1.53	1.41	1.39	0.63
2.84	0.52	3.29	0.3						3.57	1.88703	2.92	1.59						1.41	0.86	1.31	0.67						2.95	0.9	2.72	1.01						3.13	1.12	1.55	2.27						1.96	0.94	1.11	0.58
4.38	1.32	3.56	1.55						3.45	1.90694	1.87	0.63						1.54	0.18	2.43	1.01						2.53	0.86	2.52	1.5						1.94	0.26	2.74	1.86						1.52	0.75	1.09	1.08
2.33	1.18	2.89	0.83						3.32	0.669724	2.36	0.61						2.23	1.59	1.76	0.74						1.68	0.47	1.38	1.25						2.81	0.62	2.25	1.6						1.12	0.83	1.05	0.76
4.73	1.71	2.19	0.39						1.84	1.15857	2.78	1.43						3.04	1.44	2.4	1						2.33	0.82	1.04	1.14						2.37	1.08	1.46	0.78						2.07	1.94	1.49	0.9
3.63	0.74	2.95	1.03						2.26	1.08211	2.4	0.94						2.17	1.69	2.6	1.07						1.45	2.7	1.35	1.52						2.94	1.08	1.61	1.21						1.5	1.91	1.74	0.8
3.06	0.28	3.04	1.09						2.08	0.84095	3.44	1.08						3.21	0.71	1.52	0.96						1.9	0.51	2.05	0.95						2.52	0.91	1.81	1.85						1.55	0.75	1.67	0.58
4.91	0.96	3.24	1.84						2.88	0.218799	2.89	0.61						1.95	1.19	2.51	0.96						2.28	1.46	1.99	0.53						2.34	1.1	2.03	1.09						1.49	1.68	2.16	0.56
2.54	0.43	3.24	1.75						3.78	1.43269	4.43	0.83						2.85	1.65	2.86	0.87						1.73	1.6	1.61	0.83						1.74	0.39	2.92	0.76						0.88	1.51	1.65	1.34
3.16	0.68	4.76	0.69						2.57	0.441405	3.06	1.44						2.94	0.96	2.22	0.58						1.33	0.69	2.43	1.03						2.49	0.93	2.38	2.26						1.05	1.5	0.88	0.54
2.16	0.39	2.03	1.11						3.63	1.47211	2.35	0.64						2.68	0.73	2.39	1.08						2.31	0.73	2.36	1.47						2.21	1.27	1.85	0.56						1.04	0.2	1.47	1.2
1.9	0.56	3.59	0.85						2.01	1.48447	3.91	0.71						3.86	0.27	1.54	0.76						1.23	0.24	2.22	0.9						2.16	0.92	3.06	0.92						1.33	0.95	0.91	1.31
3.73	1.34	2.19	1.34						3.11	0.164445	1.76	0.98						2.38	0.46	2.07	0.69						1.46	0.08	1.66	0.9						3.48	0.49	2.7	1.01						2.1	0.28	0.88	0.59
2.25	1.24	2.28	0.59						2.98	0.3637	2.19	0.85						2.99	0.24	2.92	1.09						1.42	0.32	1.58	1.27						2.02	0.75	2.04	0.41						1.29	0.31	1.71	1.66
3.13	1.67	1.71	0.97						2.13	1.61072	2.03	0.85						3.32	0.19	2.57	1.11						1.43	0.54	3.24	0.85						2.36	0.5	1.87	1.17						1.48	1.43	1.05	0.35
1.87	1.47	1.45	0.67						2.74	0.929355	2.71	0.71						2.4	1.18	1.46	0.5						1.49	0.38	2.47	1.2						3.96	0.16	1.83	0.7						1.58	0.97	1.06	0.71
2.46	0.19	2.17	0.42						2.28	0.603886	3.3	1.32						1.17	0.41	2.88	1.9						1.61	0.26	2.34	0.69						2.57	0.21	2.11	0.62						1.26	1.44	2.06	0.91
2.71	0.4	2.76	1.34						2.93	0.123894	3.1	1.04						2.49	0.3	1.5	0.45						1.23	0.43	2.28	0.98						1.55	1.98	1.48	0.89						1.88	0.12	1.01	0.86
2.42	0.12	2.23	1.14						5.76	0.365201	3.47	0.96						1.55	0.51	2.71	1.05						1.33	1.45	2.92	0.91						2.57	0.85	2.63	0.89						1.41	1.36	1.08	0.72
2.41	0.47	3.22	0.91						2.74	0.817641	4.74	0.66						2.12	1.04	2.49	1.39						1.95	0.66	1.72	1.67						1.83	0.82	2.62	1.13						1.55	0.99	1.61	1.33
3.26	1.87	1.74	1.39						2.94	0.272227	1.82	0.5						2.43	1.6	2.02	1.01						1.33	0.62	2.26	0.88						4.05	1.15	2.03	0.77						1.39	0.57	1.37	1.19
3.09	0.68	1.67	1						2.58	2.65775	2.29	0.4						1.72	0.25	2.05	0.6						1.14	0.57	2.66	0.95						1.3	0.18	2.58	0.94						1.86	0.32	1.45	0.78
3.03	1.87	4.65	1.13						2.77	0.355364	3.98	0.67						2.24	1.35	2.54	1.01						2.23	1.29	2.91	1.28						1.69	1.12	1.56	0.62						1.6	0.12	1.07	0.84
2.84	0.25	2	0.99						3.77	0.630556	2.59	0.78						2.23	1.43	2.31	0.75						1.45	0.96	1.77	0.84						1.83	1.14	1.9	0.7						2.21	1.15	1.43	0.58
2.44	0.73	3.55	0.92						3.84	1.00377	2.71	1.11						3.16	1.09	2.32	0.79						1.03	1.06	1.76	1.13						1.87	1.27	1.89	0.8						1.15	0.61	0.98	0.76
2.96	0.78	3.22	0.98						2.9	0.282598	4.08	0.91						2.2	1.1	2.1	1.02						1.55	2.15	2.53	0.9						1.58	0.86	1.87	1.66						1.43	0.82	1.17	0.65
2.06	1.89	2.58	0.95						2.63	0.787076	2.13	1.18						2.95	0.37	1.95	0.97						2.11	1.71	1.98	1.26						2.55	0.58	3.36	0.55						1.23	0.71	3.7	0.7
2.96	0.28	2.59	0.76						2.22	1.45671	3.47	1.85						1.94	1.21	1.96	0.89						1.25	0.52	2.22	0.88						2.4	0.84	1.93	1.69						1.67	0.68	1.8	1.01
2.7	0.21	2.54	1.19						2.35	0.953442	3.21	0.7						2.36	1.25	1.15	0.94						1.24	0.77	1.89	0.71						1.79	2.63	1.6	0.55						1.05	1.64	1.4	0.88
3.09	0.8	1.92	0.77						2.8	1.2793	3.52	0.77						4.01	1.32	2.47	0.87						2.12	1.53	1.44	0.74						1.37	0.77	1.88	0.72						1.36	0.69	1.89	0.87
2.09	1.73	4.44	0.64						3.74	0.42529	2.35	1.16						3.87	0.15	1.92	1.65						1.67	0.16	1.51	1.83						1.72	1.08	1.34	2.29						1.55	0.18	0.98	1
2.51	0.66	2.85	1.78						4.45	1.19251	3.06	1.01						2.01	2.01	2.73	1.02						2.7	1.4	1.38	1.01						1.58	0.1	1.23	1.55						1.7	0.18	1.07	0.75
2.93	0.17	3.1	0.83						3.71	0.548047	2.65	0.9						3.07	0.99	1.95	0.79						1.6	1.22	1.91	0.34						1.15	1.27	2.82	1.52						0.97	0.94	1.72	0.9
3.03	1.07	2.62	1.53						3.02	0.782103	4.26	0.67						2.95	1.23	1.73	0.53						2.58	1.09	1.98	1.21						1.4	0.34	2.12	0.81						2	1.02	1.2	1.56
2.45	0.28	4.18	0.76						4.69	2.02311	2.66	0.78						1.95	0.23	1.11	0.62						1.01	1.57	2.04	0.81						1.38	0.87	2.16	2.49						1.53	1	1.31	0.96
2.83	0.25	3.15	0.86						4.62	0.607046	2.13	0.52						1.55	2.96	1.53	0.84						2.95	0.5	1.98	1.16						1.81	1.17	2.53	0.6						1.59	0.23	3.26	0.49
3.13	0.98	3.64	0.59						3.1	0.200536	2.27	0.76						2.47	0.94	1.17	1.03						1.73	0.31	2.47	0.81						1.08	0.33	1.78	0.92						1.6	0.21	1.36	0.85
6.22	0.93	2.34	0.88						2.85	0.384308	3.34	1.31						1.17	0.94	2.38	1.05						1.87	1.18	2.08	0.24						2.1	1.17	2.01	0.9						1.81	0.26	1.54	1.69
3.69	1.06	3.96	0.88						2.62	0.688264	2.23	1.63						1.52	1.02	2.51	1.21						1.49	0.27	2.91	1.24						1.11	1.03	1.4	0.95						1.57	0.24	1.62	0.94
3.83	1.27	2.37	0.77						3.8	0.700365	3.24	1.52						1.12	0.4	1.67	1.37						1.19	1.73	1.92	1.4						1.6	0.27	1.92	1.26						1.15	1.18	1.14	1.16
5.19	1.06	3.3	0.98						3.74	0.644893	4.47	0.65						3.01	0.3	1.55	0.6						1.14	0.82	1.77	0.63						2.23	1.33	1.63	2.43						2.02	1.17	1.58	0.59
5.32	0.54	3.84	1.17						3.1	0.785681	1.85	0.76						1.73	0.77	3.08	1.05						2.89	0.62	2.34	0.99						2.77	1.15	1.87	0.78						1.9	0.6	1.94	1.02
2.98	0.55	2.74	1.12						2.5	1.81828	2.1	0.94						2.71	0.98	1.84	0.7						1.42	0.9	1.46	1.31						1.47	0.82	3.33	1.98						0.97	0.15	1.13	1.19
2.9	0.83	3.65	1.39						3.58	0.203247	3.31	1.01						2.32	0.91	1.68	1.22						2.74	1.08	2.92	0.78						1.84	0.16	1.41	0.62						1.16	0.76	1.45	1.55
2.59	0.15	2.55	1.23						2.27	0.630897	2.11	0.75						1.72	1.07	3.38	1						1.55	0.97	3.04	1.14						2.45	1.2	2.02	0.82						1.4	1.3	1.69	0.73
4.42	1.29	3.73	0.97						2.43	0.978851	3.13	1.14						1.07	0.57	1.95	1.37						1.81	0.55	2.09	0.98						3.51	0.47	1.38	0.87						1.64	0.32	1.39	0.85
3.47	0.32	3.6	1.11						1.93	0.477833	2.74	0.78						1.52	1.23	2.05	0.5						2.39	1.54	2.38	0.84						2.11	1.38	2.79	0.83						1.21	2.66	1.4	1.34
4.12	1.5	2.77	1.71						2.45	0.504609	2.06	0.76						2.06	1.38	1.72	1.31						2.35	0.56	0.99	1.67						1.74	0.25	1.3	0.6						1.43	0.9	1.64	0.93
4.41	1.2	3.27	1.24						4.88	0.528885	2.16	1.07						1.6	1.65	1.86	0.76						1.41	0.3	1.75	0.72						1.52	0.52	3.27	1.14						1.77	1.07	1.19	1.97
3.43	0.11	3.38	1.93						3.1	1.01443	2.31	0.71						2.53	1.7	2.59	1.13						1.46	0.1	2.66	0.89						2.85	0.89	1.58	0.63						1.52	0.24	1.69	0.71
2.16	0.97	3.74	0.98						2.59	0.193048	3.05	0.95						1.49	0.12	2.04	1.12						3.16	0.85	1	0.98						2.36	1.09	1.92	0.79						1.2	1.46	1.85	0.93
2.58	0.86	2.74	1.12						2.3	0.121987	2.61	0.87						2.23	2.51	3.6	0.73						2.22	0.98	1.06	0.79						1.99	1.13	2.12	0.98						1.65	1.01	1.02	1.04
1.96	1.99	3.08	1.67						2.49	0.432954	3.63	0.81						2.18	1.39	2.82	0.81						1.92	1.77	2.09	1.4						2.66	1	1.93	0.85						1.93	1.57	1.68	0.88
4.52	1.24	2.58	1.19						1.99	1.29936	3.16	1.04						2.21	1.74	2.32	1.09						1.6	0.35	0.84	1.04						3.01	1.01	1.52	0.6						1.19	1.74	1.25	1.14
2.44	1.38	3.87	0.84						1.83	1.06222	3.13	0.54						2.31	1.22	2.39	1.12						1.81	0.72	1.66	0.62						1.9	1.74	3.99	0.7						1.64	0.81	1.28	0.74
2.39	1.45	4.77	1.01						3.02	0.706253	1.93	0.89						1.86	1.57	2.95	1.08						1.95	0.6	2.96	0.99						1.9	0.18	2.91	0.87						2.01	1.18	1.15	1.34
2.64	0.37	3.33	0.85						2.14	0.478339	3.57	0.82						1.75	1.31	2.53	0.82						1.67	0.27	1.31	0.66						2.38	1.33	2.11	0.66						1.39	0.11	1.15	2.4
3.87	1.91	3.77	0.69						2.96	0.831274	1.89	0.81						3.33	0.23	2.16	0.85						1.84	0.2	1.36	0.8						2.33	1.19	1.57	1.19						1.36	0.7	1.34	1.4
1.97	1.51	2.67	0.97						2.97	0.581958	4.97	1.07						2.35	2.01	2.41	0.64						2.33	1.51	1.81	0.48						1.36	0.56	2.69	0.66						1.46	1.4	0.99	0.97
2.09	1.25	3.83	1.27						3.4	0.627101	2.98	0.04						2.39	1.83	1.48	1.54						1.95	0.8	1.97	1.13						2.93	0.91	1.95	0.5						1.5	0.21	1.22	1.68
3.19	0.48	3.17	1.88						2.3	1.65345	2.43	0.7						2.24	1.1	2.26	0.9						1.26	1.55	2.11	1.2						1.75	0.15	1.73	1.05						1.53	1.38	1.29	1.19
3.05	0.48	3.1	1.26						2.24	1.1641	2.76	0.84						2.17	1.95	2.37	1.09						1.93	0.49	2.04	0.68						1.86	1.25	1.79	1.36						1.66	0.69	1.14	1.47
2.72	0.46	2.07	0.45						3.66	1.71005	2.22	0.68						1.65	0.11	1.27	1.24						1.23	1.13	1.29	0.55						1.62	0.23	2.24	0.75						1.13	1.25	1.41	2.29
4.2	1.86	3.71	0.96						2.26	1.04924	2.14	0.57						3.57	0.91	3.25	0.7						1.59	0.82	2	1.61						1.52	0.53	2.5	0.74						1.49	0.81	1.62	1.69
2.79	1.16	3.5	0.62						3.09	1.39203	3.61	0.57						2.98	1.21	2.16	0.56						1.28	0.65	2.3	1.18						2.44	1.15	2.11	1.8						1.48	1.44	0.85	1.16
2.12	1.77	2.81	0.81						2.69	0.211598	2.21	0.85						2.91	0.88	2.42	1.14						2.41	1.34	1.19	1.12						3.33	0.41	2.05	0.88						1.2	1.62	2.31	1.15
4.84	1.32	3.78	0.8						2.13	1.07876	2.11	0.73						2.57	1.44	2.71	1.16						2.15	1.02	2.24	0.47						3.04	1.53	1.68	0.86						1.1	1.52	1.71	0.97
4.03	1.01	2.9	0.66						2.22	1.25594	2.98	1.11						2.79	1.19	2.16	0.82						2.23	1.37	1.53	1.34						2.28	0.12	1.56	0.49						1.38	1.2	1.36	0.88
2.53	1.87	2.7	0.92						2.4	0.469763	2.76	0.89						1.96	1.8	1.66	1.03						2.41	0.97	1.4	0.62						3.09	1.04	2.02	0.58						1.3	1.64	1.41	0.94
1.98	1.43	4.4	0.98						3.04	0.402452	1.98	0.7						3.6	0.21	2.05	1.27						2.32	1.35	1.77	0.91						2.86	0.86	2.43	0.6						1.35	1.85	1.9	0.31
3.02	0.47	3.2	1.71						2.49	0.561615	3.28	0.82						1.93	1.14	2.24	1.01						1.98	0.97	2.16	1						1.98	0.82	2.13	1.36						1.03	1.93	1.33	1.21
2.28	1.31	2.7	0.65						4.19	0.827596	2.65	1.1						3.61	0.35	1.74	0.36						2.03	0.42	1.83	1.1						2.12	1.37	2.34	0.74						1.72	0.2	1.27	2.31
3.29	0.66	3.64	0.5						2.62	1.75405	1.89	0.76						3.23	1.58	2.45	0.89						2.22	1.21	1.31	1.25						1.39	0.58	2.53	1.16						1.04	1.44	1.13	1.23
2.49	1.26	2.3	1.57						2.49	1.886	3.06	0.79						2.2	1	2.47	0.99						2.26	1.36	2.62	1.48						3.08	1.25	1.98	1.28						2.23	0.91	1.58	0.79
3.84	1.35	2.62	0.95						2.19	1.20902	2.17	0.74						4.02	0.28	1.78	0.86						2.12	0.15	2.09	0.48						1.36	0.67	2.27	0.54						1.37	0.63	1.03	0.95
3.86	0.85	1.81	1.01						3.79	0.950452	3.28	1.03						2.08	2.39	2.07	0.97						2.06	0.94	1.63	1.29						3.24	0.8	2.1	0.69						1.34	0.32	1.21	1.07
3.72	1.19	3.18	0.83						3.09	0.457499	2.05	0.51						3.34	1.4	2.74	1.13						1.92	0.25	2.19	0.53						1.82	0.79	1.36	0.76						1.02	1.06	1.17	0.65
5.89	0.71	4.69	1.01						2.19	0.91154	1.87	0.71						1.76	1.1	1.69	0.95						1.32	1.22	2.2	1.21						2.02	0.19	1.7	0.76						1.41	0.81	1.58	0.69
3.72	0.31	3.31	0.95						3.33	2.13617	2.4	1.03						1.55	2.29	3.41	1.14						1.61	0.71	1.37	0.56						2.38	0.53	2.4	0.63						1.99	1.12	2.02	0.92
3.02	0.28	4.15	0.89						4.35	1.19775	2.65	0.51						1.31	1.2	1.69	0.96						1.43	1.21	2.48	0.84						1.77	1.47	2.05	1.44						1.97	0.93	1.09	1.69
4.31	1.64	2.32	0.56						1.83	1.77472	1.84	1.15						2.3	0.41	1.91	0.62						2.78	1.59	1.81	1.38						1.91	0.51	2.62	0.66						1.75	0.3	1.37	0.63
3.1	0.19	4.09	0.86						2.95	0.209958	1.76	0.7						1.31	1.88	1.84	1.09						2.13	0.25	1.27	0.75						3.55	0.17	1.76	1.3						1.83	1.37	1.07	0.56
3.04	0.24	3.27	0.88						4.43	1.08321	2.25	1.12						1.74	1.6	1.17	0.9						1.63	0.57	2.21	0.9						2.15	0.21	1.31	0.65						1.44	0.9	1.63	0.62
1.78	2.28	3.42	0.95						2.43	1.86405	3.16	0.65						1.89	2.06	2.57	0.45						1.8	0.27	0.96	0.91						2.57	2.64	2.03	0.76						1.51	0.61	3.21	1.41
3.1	0.9	2.86	1.18						3.07	0.365955	2.83	1.02						1.88	0.84	1.58	0.72						1.61	1.27	2.01	1.65						1.63	0.2	1.75	1.09						2.47	1.04	1.7	1.06
1.87	1.08	3.38	1.4						4.26	1.11112	2.62	1.19						2.89	0.33	2.49	1.08						1.56	0.29	1.85	1.26						3.39	0.96	2.47	1.24						1.97	1.9	0.96	0.54
2.98	1.33	3.59	0.95						2.49	1.09826	2.05	1.1						3.11	1.05	1.23	0.85						2.87	0.83	3.22	1.32						1.18	0.69	1.68	1.22						1.13	1.1	1.51	1.25
2.32	2.01	2.07	0.89						3.11	0.649568	3.28	1.39						2.43	0.64	1.68	0.96						2.75	1.11	2.4	0.91						3.16	0.16	2.41	2.01						1.43	1.93	1.91	0.6
2.43	0.51	3.38	0.98						2.83	0.269463	3.78	0.87						2.19	0.36	2.36	0.78						4.9	0.46	2.99	1.05						1.89	2.12	1.45	0.57						1.3	0.14	1.89	0.83
1.85	0.44	4.42	0.74						3.73	0.144302	3.03	0.82						2.75	0.34	1.28	1.12						1.32	1	1.87	0.64						2.32	0.39	2.59	0.83						1.61	1.11	1.41	1.07
2.87	1.41	3.24	1.71						2.87	1.17924	1.64	0.62						2.41	0.89	3.4	0.72						1.64	0.31	1.5	0.79						1.15	0.76	2.51	0.89						1.65	0.22	1.84	0.75
2.13	0.94	3.33	1.86						1.8	0.172038	3.34	1.25						2.83	0.21	3.86	0.82						2.05	0.2	1.83	1.39						1.59	1.41	2	0.52						1.56	0.95	1.93	1.41
2.78	1.25	2.59	0.69						2.56	2.07031	2.68	0.79						2.12	1.56	1.41	0.46						2.6	1.59	2	0.86						1.5	0.41	2.08	0.61						1.5	0.95	1.62	1.3
3.12	1.13	2.04	1.28						2.27	1.39918	1.88	0.63						3.19	0.58	2.24	0.82						3.07	1.08	1.48	0.89						0.92	0.97	1.65	1.71						1.6	0.58	1.56	0.58
2.85	0.34	3.38	0.87						3.87	0.21789	2.62	0.97						2.46	0.54	2.77	1.58						1.88	0.27	3.69	0.61						1.04	1.06	2.23	0.74						1.32	1.35	1.75	0.8
2.01	1.54	2.3	1.28						3.02	1.35594	1.47	0.46						2.38	1.08	2.9	1.08						2.08	0.63	2.36	1.45						3.13	0.7	2.22	0.62						1.68	0.7	1.42	0.93
3.4	1.44	2.42	1.13						1.96	2.30403	1.63	0.87						1.91	1.96	2.61	1.26						1.76	0.19	1.86	1.02						2.22	1.92	2.34	1.13						1.36	2.93	1.04	1.04
2.71	0.47	1.99	1.52						4.19	1.61905	3.52	1.01						2.12	0.56	2.9	0.91						2.03	0.83	1.4	1.46						1.87	0.73	1.62	0.81						1.78	0.75	1.93	1.36
2.83	0.21	1.7	0.88						2.03	1.04583	2.14	0.84						1.3	0.23	1.89	0.68						2.36	1.55	1.86	1.57						2.29	1.45	2.64	0.7						1.58	0.86	1.56	1.09
3	0.47	1.79	1.45						4.03	0.146439	4.34	0.76						2.19	1.77	2.24	1.34						2.59	1.42	1.49	1.25						1.92	0.97	2.71	0.61						1.57	0.18	1.62	0.92
2.77	1.28	2.98	0.65						2.76	1.35831	2.24	0.8						2.51	1.12	1.61	1.05						2.26	1.65	2.21	0.75						2.02	1.73	1.36	0.65						1.06	0.78	1.62	1.26
3.84	1.2	1.43	0.62						2.71	0.161113	2.07	0.67						1.87	1.54	2.28	1.1						2.28	1.49	1.99	1.26						2.54	0.67	1.7	0.52						1.68	0.36	0.88	0.46
2.65	0.21	1.88	1.3						1.51	0.625364	2.68	0.97						2.33	1.45	2.25	1.16						2.36	1.73	1.85	1.72						1.02	2.43	1.69	1.36						1.58	0.36	0.92	1.05
2.73	0.28	2.43	0.39						2.11	0.407222	4.72	0.94						2.22	1.76	1.34	1.58						2.53	1.3	3.33	1.17						2.56	2.51	2.99	0.73						1.77	2.36	1.48	0.69
2.27	0.38	3.4	0.72						2.66	0.44435	3.37	1.05						2.34	1.73	2.7	1.31						3.13	0.94	1.4	1.54						1.42	1.42	1.98	0.99						1.02	1.21	0.83	1.1
2.56	0.23	1.93	1.06						2.19	1.00674	3.94	0.76						2.24	1.93	1.8	1.27						1.87	0.3	1.08	1.18						1.57	0.73	1.59	0.88						1.78	1.07	1.55	1.09
2.71	0.37	3.62	0.78						1.81	0.639457	2.76	1.06						2.95	0.26	2.28	1.45						1.81	1.37	1.73	0.58						1.61	0.5	1.23	1.73						1.19	1.37	1.3	1.23
3.22	0.54	2.99	0.96						2.43	0.224259	2.11	0.85						2.79	1.23	2.14	1						1.11	1.37	1.66	0.6						2.53	1.05	1.6	0.5						1.22	1.04	1.56	0.88
3.05	1.77	1.69	0.75						2.53	0.393382	3.72	1.1						2.76	1.31	2.04	0.42						2.68	1.22	1.03	0.62						1.84	1.08	1.81	0.58						1.25	1.3	1.36	1.81
3.08	0.73	2.76	0.92						2.93	0.747687	1.81	0.69						2.35	1.52	2.91	1.14						2.73	1.41	1.86	1.01						2.01	0.46	1.53	1.86						1.09	0.59	1.91	1.09
3.22	1.07	3.5	0.87						1.7	2.77501	2.87	0.59						3.06	0.14	2.14	0.96						2.87	0.9	1.55	1.49						2.43	1.12	1.78	0.4						1.14	1.26	1.55	0.88
4	1.26	2.28	1.38						2.28	1.03365	3.26	1.22						1.92	1.05	2.1	0.61						2.36	1.62	1.15	1.17						2.18	0.79	1.65	1.11						1.24	0.63	1.46	0.71
3.13	0.24	2.38	0.98						1.75	1.28481	2.29	1.1						1.85	0.52	3.49	1.19						1.82	0.23	1.2	1.51						3.5	0.7	1.18	0.48						1.52	0.93	1.23	0.62
2.44	0.76	1.71	0.92						2.31	1.729	2.94	1.36						2.04	0.28	1.86	1.21						2.05	0.53	2.89	1.2						2.11	1.32	1.31	0.66						1.36	0.84	1.21	1.32
2.97	0.25	2.47	1.03						1.56	2.03185	2.59	1.21						2.51	0.77	1.84	0.8						1.68	2.24	3.11	1.06						1.25	0.82	2.72	0.9						1.3	1.86	1.56	0.9
2.43	0.68	2.8	1.15						2.43	1.67579	2.35	0.81						2.75	0.82	2.33	1.32						1.34	1.36	2.21	1.26						2.43	1.12	1.83	0.6						1.48	1.33	1.44	0.65
3.54	1.47	2.61	1.64						3.44	0.790199	2.07	0.71						2.83	0.97	2.62	1.2						1.28	0.26	1.47	1.25						2.54	1.29	1.87	0.62						1.65	0.14	1.55	0.66
3.37	1.31	1.98	0.95						2.66	1.18644	1.86	0.59						2.45	1.34	1.67	1.06						1.15	0.16	2.14	1.09						1.85	1.91	2.23	0.57						1.55	1.77	1.41	0.9
2.48	0.96	2.03	0.79						2.65	0.992452	2.43	0.68						2.97	0.8	1.51	0.79						2.48	1.1	2.11	0.95						1.72	0.29	2.83	0.38						1.23	0.5	0.78	0.71
3.38	0.64	2.96	0.8						3.21	0.194936	1.9	0.7						2.58	1.44	1.73	1.02						1.45	0.2	1.09	1.18						3.64	0.39	2.72	0.59						1.15	1.27	1.58	1.03
3.89	1.4	2.1	1.21						3.2	1.46694	2.45	0.68						2.5	0.74	2.12	1.08						2.17	0.35	2.24	1.24						2.12	0.27	2.17	0.75						1.88	1.31	1.15	0.63
4.26	0.35	3.15	0.5						3.97	1.23396	1.79	0.61						2.64	0.78	2.36	0.58						1.43	0.13	1.34	1.05						3.2	0.76	1.98	0.64						1.36	0.33	1.26	1.38
2.53	1.01	1.98	1						3.18	0.316606	2.41	1.05						1.78	0.08	2.8	1.79						1.29	0.29	1.17	2						2.21	0.66	1.44	1.22						1.69	0.43	1.83	1.27
2.39	1.23	3.09	1.06						3.21	0.207867	3.47	0.9						2.02	1.48	1.65	1.66						1.52	1.61	2.63	1.4						2.11	0.17	1.5	0.65						1.81	0.73	0.99	0.54
3.54	1.19	2.54	1.2						2.72	0.756005	2.87	1.93						1.61	1.17	2.54	1.12						1.46	1.31	2.73	1.54						1.92	1.33	1.29	1.76						1.46	0.53	1.77	0.68
2.11	1.52	1.96	1.15						2.71	1.13934	2.41	1.16						1.55	0.43	1.97	0.79						0.97	1.29	2.13	1.27						1.98	0.28	2.35	1.52						1.62	1.43	1.9	1.31
3.25	1.21	3.02	0.72						3.09	0.288188	2.82	2.37						2.21	1.05	2.31	0.78						1.41	0.67	2.76	1.19						1.96	0.96	2.12	0.67						1.16	1.4	1.29	1.85
4.42	1.35	2.69	2.18						3.6	0.697525	3.09	1.02						1.72	1.24	2.51	0.84						1.38	0.5	2.37	0.99						3.72	0.7	2.71	1.13						2.06	1.05	1.62	0.99
3.02	0.69	3.68	0.93						3.98	0.159769	3.24	0.61						1.68	1.45	1.41	0.92						2.1	1.29	1.73	1.61						3.3	0.58	2.83	0.9						1.15	1.37	1.17	0.94
2.63	0.46	3.22	1.39						3.97	1.17681	2.75	0.88						1.37	0.23	1.79	0.5						1.43	0.81	1.92	1.82						1.77	0.24	1.92	1.09						2.1	1.07	1.1	2.24
3.48	1.09	2.64	0.79						2.49	0.865522	2.24	1.2						2.29	1.19	2.23	1.23						1.11	0.95	1.7	0.93						1.94	1.27	1.82	1.04						1.09	2.05	1.2	1.04
4.5	1.27	3	1.51						2.92	1.10063	4.75	0.9						2.6	0.45	2.08	0.39						1.9	0.94	1.63	1.12						1.63	0.21	2.29	1.46						1.75	0.1	1.38	0.91
2.52	1.99	2.82	1.01						3.55	1.20357	2.63	0.9						1.88	0.55	2.92	0.82						1.43	1.11	1.19	0.94						1.49	0.63	3	1.77						1.75	0.19	1.57	1.1
3.64	0.62	3.3	0.77						4.06	0.361466	2.72	1.02						2.29	0.73	1.77	1.31						0.96	2.72	2.8	0.96						1.25	0.94	2.31	0.8						1.56	2.04	1.42	0.81
3.99	0.89	4.79	0.76						3.12	1.2787	2.54	0.83						1.67	2.16	1.59	0.64						1.36	0.46	2.13	1.23						1.95	1.55	2.63	0.42						1.47	0.13	1.3	0.64
2.84	1.15	2.57	0.96						2.68	1.20472	2.74	1.14						1.56	0.42	1.63	0.99						2.05	1.74	1.98	0.75						3.65	0.84	2.78	0.95						1.75	0.78	1.2	1.8
2.37	1.59	2.11	1.29						1.97	1.5991	1.53	2.14						3.04	0.22	1.4	1.34						1.55	0.25	2.45	0.71						1.94	0.11	2.48	0.52						1.36	1.31	4.52	0.57
2.47	1.13	3.33	1.19						2.37	1.11575	2.02	1.12						2	1.54	1.8	1.67						1.2	0.18	1.97	1.06						2.24	1.45	1.84	0.83						1.16	1.31	1	0.84
2.72	0.29	2.2	1.34						3.82	0.706765	3.9	0.8						2.03	1.39	1.73	1.12						1.47	0.55	3.33	2.59						2.25	0.81	5.17	0.73						1.26	0.67	1.44	1.02
3.56	0.48	5.08	0.8						3.09	0.919706	2.99	0.62						1.66	1.09	2.3	1.23						1.34	1.18	3.01	1						1.46	1.67	1.56	0.89						2.04	0.98	1.24	1.44
2.51	0.85	2.57	1.32						2.86	0.218343	2.84	1.06						2.62	0.27	2.8	1.31						1.72	0.24	1.61	1.25						1.62	1.67	2.06	0.84						1.23	0.73	0.94	2.06
1.97	1.04	2.71	1.2						2.9	1.78146	3	1.07						2.26	1.08	1.92	1.25						1.27	0.7	1.61	0.87						1.67	1.4	2.46	1.74						1.67	1.2	1.56	1.74
3.1	0.21	2.55	1.06						3.98	0.492756	1.53	1.85						2.14	1.1	1.65	0.92						1.99	1.79	1.57	1.53						1.11	0.46	1.97	0.4						0.96	0.11	1.77	1.34
2.31	1.34	4.03	0.64						3.28	1.12456	2.87	1.05						2.53	1.85	2.71	1.12						1.43	0.4	2.17	1.2						1.9	1.19	2.49	1.67						1.38	0.75	0.83	0.48
2.65	0.44	4.48	1.08						2.59	0.923231	1.59	3.04						2.11	0.69	1.92	0.58						1.61	0.21	1.84	0.5						1.44	1.44	2.07	1.14						1.72	0.53	0.94	1.16
2.85	0.32	2.59	1.09						3.6	1.17539	3.71	1.09						2.39	1.25	2.72	1.36						1.45	0.22	3.23	1.19						1.46	0.55	2.72	1.31						1.36	0.02	1.5	1.04
3.63	0.28	3.05	0.93						2.44	1.76329	2.43	0.72						2.06	1.55	2.63	1.04						2.88	1.02	2.7	0.94						2.17	0.34	1.9	1.45						1.68	0.3	1.17	0.77
2.32	1.95	2.62	2.01						3.3	0.076418	2.7	2.35						1.72	1.04	3.44	0.71						1.43	0.17	2.23	0.85						1.26	0.27	1.7	1.74						1.52	0.29	1.42	1.17
4.11	1.03	3.58	0.71						2.89	0.197767	2.45	1.38						3.14	0.36	1.76	0.94						1.08	0.39	2.56	1.33						1.38	1.12	2.93	2.09						1.61	0.63	1.18	1.61
4.36	0.87	4.31	1.07						3.85	0.333615	2.21	0.85						2.09	1.17	2.47	1.12						1.52	0.48	2.29	0.63						1.38	0.27	2.12	0.93						1.58	0.61	1.25	1.22
3.33	0.28	5.41	1.06						2.13	2.1532	1.66	1.11						2.81	1.2	2.03	1.23						2.36	2	2	0.52						1.3	0.66	2.44	1.38						1.26	0.85	1.36	2.02
2.32	1.15	2.41	1.08						3.67	1.99995	3.37	0.98						2.58	0.83	2.27	0.7						1.23	0.27	1.78	1.25						1.97	1.35	2.31	0.48						2.01	0.37	0.85	0.62
3.6	0.97	4.21	0.62						2.33	1.14493	2.78	1.08						2.76	1.19	1.87	1.31						1.14	1.15	2.36	1.13						1.64	1.22	2.43	0.6						1.35	1.66	1	0.67
2.63	1.2	3.25	1.15						3.49	1.39134	1.7	1.83						2.55	0.98	1.59	0.68						1.56	0.93	1.94	1.18						1.32	1.08	2.19	1.57						1.56	0.47	1.13	1
2.62	1.63	2.69	1.3						2.26	0.063597	2.38	1.78						3.01	0.96	2.24	0.75						2.43	0.93	1.56	1.76						1.85	1.47	2.05	0.78						1.25	2.13	1.27	1.08
3.35	0.38	2.05	0.92						1.96	0.578164	2.21	1.46						2.87	0.96	2.27	1.09						2.11	1.29	1.65	1.18						1.85	1.85	2.19	0.67						1.33	0.61	1.45	1
4.34	1.57	3.46	1.14						3.71	1.31993	2.88	0.96						2.37	1.54	2.48	1.24						2.35	1.01	0.86	1.53						2.78	0.92	1.9	0.5						1.91	0.09	0.97	0.65
3.55	1.29	4.26	1.27						2.25	0.43527	2.88	1.13						2.9	1.02	1.32	0.91						1.63	0.6	2.69	0.83						1.19	1.3	1.38	0.38						2.36	1.43	1.68	1.03
3.09	0.46	2.56	0.74						1.23	1.07094	2.27	0.68						2.89	0.77	2.09	1.22						2.45	0.92	2.35	0.87						2.32	1.12	1.88	0.53						1.18	0.99	1.4	0.77
5.28	0.73	2.33	1.04						1.89	1.30718	1.96	0.63						2.89	0.93	2.17	1.05						2.91	1.35	0.96	1.24						1.44	1.22	2.13	0.7						1.33	0.97	1.38	1.45
2.48	0.47	2.99	1.56						2.45	1.27085	3.48	0.88						2.5	1.35	2.07	0.83						1.29	0.43	2.92	1.01						2.43	0.73	1.99	1.69						2.54	1.77	1.59	0.96
2.35	1.37	4.23	1.27						2	0.645399	2.41	0.85						3.13	0.37	1.82	1.1						1.38	0.77	1.1	0.98						1.36	0.56	2.73	0.76						1.88	1.37	1.19	0.77
3.2	1.32	3.82	0.55						1.67	2.30071	1.91	0.52						1.96	0.17	1.73	0.7						2.44	1.66	1.76	0.78						2.15	1.27	1.71	0.77						1.24	0.33	1.53	0.51
2.83	1.81	2.97	0.71						2.57	0.557648	3.02	1.37						3.87	0.21	1.98	0.98						1.58	0.1	1.43	1.13						1.76	0.5	1.86	1.71						1.54	0.86	0.98	1.83
3.02	0.7	4.54	0.61						6.13	0.348745	3.85	0.9						2.62	1.94	1.73	0.97						2.26	1.11	1.79	1.08						1.25	2.38	1.96	0.73						1.54	1.15	1.17	0.68
3.67	1.53	4.92	1.03						2.39	0.367587	2.79	0.8						1.84	0.19	2.17	0.99						1.88	1.89	1.17	1.06						1.23	1.26	2.01	0.86						1.99	1.19	1.12	0.64
2.29	0.25	4.42	0.69						2.12	1.02706	1.43	1.05						2.2	1.27	1.78	1.42						2.58	1.81	2.5	0.87						1.23	1.23	2.28	1.5						1.24	2.51	1.4	0.72
3.18	1.04	4.56	0.92						2.84	1.40878	2.04	0.88						2.73	1.2	2.27	0.9						1.75	1.43	1.88	0.7						1.58	0.6	2.25	0.81						1.43	0.29	1.36	0.83
2.71	2.07	3.49	0.73						3.76	1.13429	2.13	1.5						2.57	1.68	1.83	1.25						1.57	1.01	2.1	1.02						1.88	1.16	3.35	0.5						1.22	2.26	1.43	1.04
1.77	1.26	4.57	1.13						1.84	1.47259	2.33	0.97						2.79	0.87	2.63	1.05						1.27	1.88	3.32	1.12						2.13	0.68	2.18	0.82						1.45	0.58	0.75	0.54
2.96	0.6	2.69	1.17						1.92	1.66299	1.88	0.55						2.33	0.25	2	1.16						1.23	2.16	2.4	1						1.46	0.09	2.95	1.59						1.61	0.46	3.6	0.29
1.82	0.86	5.5	0.52						2.71	0.654474	2.83	0.92						1.63	1.08	2.82	1.35						1.96	1.26	2.03	0.5						2.88	1.08	1.89	0.49						1.33	0.49	1.16	1.29
2.74	0.27	2.13	0.55						2.99	1.12917	3.21	0.62						2.34	0.35	2.5	1.2						1.6	0.4	2.04	1.06						1.91	0.71	2.02	2.47						1.88	0.77	1.54	0.7
2.41	0.95	3.11	1.18						2.7	0.180315	2.95	1.77						2.18	0.51	2.51	1.5						2.34	1	1.73	0.77						2.13	1.5	2.38	0.91						1.94	1.31	0.96	1.29
1.86	1.45	2.77	1.17						2.4	0.9313	2.23	1.24						2.09	0.88	1.96	0.94						1.51	0.65	2.12	0.61						1.83	0.69	1.87	1.21						1.93	0.81	1.25	0.59
1.84	0.77	4.19	0.71						3.14	0.221613	3.23	1.04						2.92	0.37	2.47	1.33						2.24	1.23	1.86	1.59						5.11	1.03	1.75	1.07						2.02	1.15	1.32	0.92
3.02	1.73	3.41	0.84						3.76	1.45805	1.71	0.87						1.69	2.18	1.64	0.72						1.7	0.12	1.84	0.95						2.21	2.98	2.19	0.8						1.55	1.33	1.43	1.09
3.02	1.37	4.34	0.69						1.95	2.58055	2.46	0.67						2.38	1.05	2.72	1.29						3.02	1.07	1.5	0.27						2.63	1	2	0.65						1.6	1.01	1.28	1.1
2.62	1.58	3.26	1.02						3.57	0.637039	2.26	0.6						2.19	1.21	2.74	1.47						2.51	2.05	1.87	0.72						2.29	1.43	2.39	0.49						1.51	0.65	1.07	0.39
2.98	1.96	2.85	0.85						2.72	0.18432	4.77	1.02						1.96	1.8	2.55	0.55						2.8	1.04	1.34	0.73						1.97	1.04	1.62	2.46						1.83	0.17	1.22	1.73
1.41	1.98	2.83	1.25						3.82	0.688029	3.47	0.76						2.56	0.74	2.5	1.22						3.1	0.81	4.29	1.09						1.62	0.85	1.83	1						1.07	1.7	1.14	1
2.94	0.4	4.45	1.12						2.28	1.74175	3.16	0.64						1.56	0.16	1.94	1.71						2.25	2.11	2.36	0.87						2.17	0.82	2.61	0.68						1.18	1.16	1.54	1.4
2.17	0.59	5.93	0.67						3	0.332774	2.94	1						2.95	0.64	2.6	0.82						1.87	0.6	2.58	1.36						3.36	0.19	2.49	0.82						1.25	0.97	1.31	1.73
2.36	0.36	4.09	0.9						4.16	1.63448	2.39	0.86						3.27	0.27	3.06	0.59						1.3	2.1	3.11	1.35						3	0.69	2.73	2.45						1.52	0.77	1.91	1.72
2.97	1.72	2.28	0.54						2.47	1.34273	3.37	0.78						1.28	0.88	2.74	0.74						2.55	0.8	2.59	0.66						3.26	0.22	1.69	0.85						1.14	0.66	0.92	0.68
2.54	0.53	1.88	0.52						4.55	1.23288	1.9	1.18						2.52	1.07	1.58	0.91						1.42	0.43	2	0.94						1.76	0.43	1.89	2.31						1.19	1.27	1.89	1.22
2.9	0.22	2.13	1.2						2.32	0.990161	1.92	0.83						2.89	0.54	1.48	1.48						2.56	1.8	1.97	0.79						2.61	0.81	2.24	0.93						1.12	0.58	1.88	1.01
3.55	0.59	4.35	0.81						2.98	0.413192	2.08	0.61						2.71	0.79	1.86	0.8						1.82	0.26	2.32	0.94						2.27	1.27	2.15	1.43						1.3	1.34	1.7	1.01
2.54	0.44	2.75	0.72						3.66	0.373875	3.31	0.9						2.5	0.78	2.14	1.43						2.66	1.92	1.88	0.7						2.51	1.47	1.69	1.37						2.11	1.02	1.3	1.49
2.4	1.16	2.44	0.94						3.17	0.755764	5.36	0.85						2.56	1.31	2.5	1.01						1.49	0.61	2.04	0.37						1.34	1.02	2.92	0.59						1.47	0.91	0.95	0.61
2.97	1.24	4.43	1.15						2.09	1.61925	2.34	1.02						1.92	1.36	1.94	1.34						2.52	0.92	1.83	1.22						2.97	0.83	2.5	1.87						1.83	0.11	0.96	0.65
1.94	0.82	3.32	0.7						2.92	1.49695	2.71	0.84						3.11	0.23	2.83	0.88						3.54	0.19	2.01	0.65						1.71	1.59	1.53	2.54						1.88	0.23	1.08	0.72
2.64	0.24	1.94	1.14						2.81	0.802709	2.16	1.1						3.33	0.22	2.03	0.99						2.35	1.3	2.41	0.68						2.49	0.16	2.07	0.78						1.27	0.9	1.27	1.99
2.58	1.44	2.45	0.79						2.79	0.536716	3.11	1.19						2.73	1.3	3.21	1.53						1.66	0.49	2.66	0.66						1.39	0.02	1.18	0.49						1.05	1.37	1.39	1.5
4.16	1.52	2.29	1.69						4.17	1.63634	3.89	1.21						3.1	0.22	1.57	0.8						1.8	0.39	1.74	0.56						1.15	1.03	1.58	0.83						2.04	0.9	1.41	1.21
3.45	0.37	2.91	1.21						2.51	0.965219	3.09	1.18						2.09	1.79	2.89	0.94						1.31	0.82	1.78	0.99						2.21	1.07	2.18	0.69						1.07	1.24	1.49	0.8
2.99	0.32	2.86	1.15						3.27	0.201032	3.56	1.59						1.86	0.36	1.93	0.89						1.63	0.08	1.87	1.45						1.2	1.37	2.4	0.9						1.25	1.31	1.39	2.4
3.06	0.26	2.32	0.95						3.69	1.16143	3.52	1.23						1.93	0.22	2.52	0.87						2.46	1.51	2.7	1.28						1.62	0.51	1.55	1.81						1.65	0.11	1.12	1.44
4.03	1.55	1.5	0.42						1.89	2.14435	2.82	0.8						2.13	1.45	2.93	1.34						1.42	0.08	2.79	0.97						1.43	1.76	1.88	1.92						1.84	0.21	1.22	0.77
3.15	0.32	3.15	1.2						2.84	1.99721	3.68	1.09						2.11	1.13	1.71	1.63						1.65	1.72	2.5	0.54						1.9	0.21	1.97	1.22						1.46	1.41	1.39	0.8
2.87	0.36	2.7	0.98						2.64	1.59217	6.95	1.24						2.17	0.61	2.42	1.03						1.45	0.96	2.07	0.74						1.39	0.47	1.25	1.01						1.34	2.34	1.43	1
3.2	0.33	2.5	1.06						1.28	0.49643	3.2	1.25						2.37	1.07	2.42	1.35						2.22	1.17	2.01	0.9						1.93	1.81	2.11	0.47						1.77	1.12	1.09	0.98
2.46	1.86	2.47	0.65						2.09	0.975341	3.73	1.85						1.48	0.21	1.96	1.14						2.36	0.93	1.56	1.03						3.12	0.78	2.15	0.98						1.18	0.93	0.93	0.56
2.19	1.99	2.42	1.06						2.69	0.995075	2.35	0.89						1.99	1.39	1.44	2.02						2.18	1.18	2.07	1.23						1.31	0.99	1.51	0.67						1.27	1.31	1.33	0.83
4.28	1.21	1.83	1.16						5.11	0.172272	3.03	0.7						2.05	0.93	2.8	1.21						2.15	1.35	1.98	1.23						1.51	0.02	2.45	1.2						1.14	0.96	1.52	0.84
3.87	1.46	2.47	1.45						3.26	1.09105	3.74	0.65						3.15	0.26	2.3	0.63						1.71	0.12	1.95	1.01						1.93	1.16	1.81	1.24						1.44	0.47	1.28	0.89
3.16	0.22	3.03	0.9						2.84	0.335342	2.76	0.77						2.8	1	2.88	0.66						2.95	0.73	1.75	0.83						1.53	0.31	2.32	0.43						1.86	1.25	1.1	0.82
4.01	0.9	3.76	0.86						1.75	1.43759	6.58	1.03						2.65	1.3	1.5	0.52						2.45	1.36	2.14	0.74						2.99	0.61	2.61	1.23						1.51	0.4	0.97	0.86
2.9	0.29	3.35	0.79						1.95	1.08037	2.71	0.86						2.73	1.62	2.76	0.73						1.64	0.25	1.83	1.36						2.17	1.53	3.01	0.76						1.89	0.87	1.82	1.13
2.57	0.3	2.15	1.21						2.8	1.54432	2.43	1.67						3.78	0.83	1.44	0.55						1.92	0.26	1.39	0.69						3.18	1.09	2.16	1.93						1.32	1.47	1.55	0.78
3.47	0.87	2.9	0.83						3.61	0.549407	2.18	0.65						1.68	0.45	1.45	1.03						2.6	1.69	1.85	0.87						3.11	0.82	2.22	0.61						1.04	0.89	1.96	0.62
3.44	0.52	2.78	1.17						2.35	1.13366	2.21	1.1						3.62	1	2.38	0.83						0.79	0.65	2.98	1.24						1.64	0.63	1.85	0.52						1.43	0.69	1.3	1.18
3.25	0.3	3.01	1.35						2.7	0.706794	4.12	0.75						2.74	1.18	2.13	0.79						1.56	1.63	2.01	0.8						1.95	1.17	1.71	0.33						0.83	9.15	1.32	0.78
3.74	1.15	2.43	1.41						2.32	1.14229	2.09	0.84						2.02	0.59	2.33	0.97						1.71	1.53	1.86	0.66						2.63	1.22	1.39	1.49						1.13	1.34	2.28	0.96
3.03	0.63	2.57	1.33						1.52	1.58997	2.06	0.8						2.66	1.06	1.27	1.21						1.34	0.33	2.12	0.61						2.28	0.92	1.8	0.91						1.3	0.76	1.14	0.53
1.85	1.2	2.4	0.7						2.57	0.403347	2.13	0.78						3.13	0.39	2.5	1.01						1.31	0.19	1.81	0.74						2.05	1.31	2.85	1.46						0.84	0.66	1.22	1.14
3.09	0.61	3.16	1.3						2.18	2.41447	2.86	0.78						2.73	0.86	2.31	0.64						1.41	1.35	2.62	1.27						3.5	0.44	2.05	1.05						1.07	1.81	1.24	1.35
3.71	1.19	3.31	0.92						2.79	0.156523	3.7	1.03						1.52	0.22	2.03	1.15						2.32	1.12	3.09	1.47						2.72	1.42	2.04	0.91						1.75	1	1.02	1.34
3.75	2.67	2.34	1.3						2.12	1.69172	3.12	1						1.69	1.42	1.7	0.62						4.11	1.03	1.66	0.46						3.4	0.7	2.58	0.78						1.29	0.65	1.74	0.51
2.6	1.47	4.33	0.89						3.39	1.31265	4.18	0.67						1.7	1.21	1.69	1.33						1.42	0.89	2.3	0.9						3.45	0.98	1.41	0.69						1.56	0.85	3.35	0.38
2.24	1.1	3.34	0.67						2.42	1.42449	3.05	1.18						1.93	1.39	2.04	1.03						1.99	1.13	2.46	1.17						2.03	0.95	1.72	1.2						1.76	1.21	1.12	0.6
2.12	1.36	2.12	0.71						2.38	0.970546	4.35	1.13						2.17	0.9	2.5	1.8						0.94	0.86	2.75	1.05						2.33	0.94	1.92	1.19						1.29	1.02	1.01	0.77
2.04	2.43	1.94	0.63						1.46	0.141496	3.51	0.94						2.33	1.53	1.85	0.56						1.78	1.35	3.18	0.62						2.36	1.07	2.2	0.51						1.8	1.39	1.48	2.15
4.83	0.84	2.71	0.95						3.04	0.841479	3.13	1.05						1.05	0.31	1.85	1.24						1.39	0.79	2.9	1						2.07	1.03	1.63	1						1.48	2.1	1.65	0.43
2.93	0.37	2.85	1.16						3.26	0.45672	2.94	1.35						1.31	1.92	1.82	1.08						1.35	0.85	1.26	0.79						2.42	1.42	2.38	0.89						1	3.58	1.75	0.98
3.14	0.2	3.49	1.36						2.02	1.76037	2.42	1.06						2.57	0.46	2.96	0.75						1.44	1.26	2.99	1.18						1.99	0.62	2.02	1.08						1.2	1.73	1.36	0.61
2.72	1.51	3.41	0.61						2.31	1.40486	4.12	0.66						1.78	1.26	2.21	1						1.38	1.6	1.9	0.83						1.55	0.78	1.53	0.78						1.15	0.66	1.04	0.54
3.44	1.37	2.3	0.89						3.64	1.839	2.04	1.08						1.06	0.3	1.87	0.79						1.8	0.57	2.89	0.86						1.87	0.56	2.11	0.86						2.13	1.88	1.72	1.54
5.91	1	1.79	1.13						2.3	2.41156	3.7	1.03						1.6	1.82	1.98	0.71						1.51	0.11	1.32	1.17						2.57	0.92	2.18	0.68						1.83	1.15	1.11	0.68
3.68	2.27	2.75	1.04						2.18	1.29768	2.65	0.77						2.6	0.99	1.72	0.85						1.06	1.09	1.53	1.63						3.02	1.52	1.67	1.1						1.53	1.01	0.99	1.58
3.38	0.76	2.69	1.41						2.58	1.20876	3.69	0.87						2.17	1.36	2.35	0.98						1.51	0.24	2.82	0.84						3.65	0.08	2.12	0.53						1.53	0.24	1.43	0.99
3.19	0.21	1.84	1.24						2.36	0.694636	3.16	1.8						2.13	2	2.01	1.01						1.69	2.09	3.32	1.08						1.67	1.61	1.97	0.53						1.02	1.45	1.63	2.77
3.72	0.46	2.38	0.75						3.7	1.27235	3.14	0.68						1.98	1.89	2.69	0.94						2.12	1.3	2.03	1.26						0.93	1	1.81	0.73						1.11	3	1.72	1.48
3.12	0.4	2.62	0.63						2.47	0.355252	2.14	0.67						2.13	1.88	1.48	0.93						0.93	1.35	3.12	0.83						1.87	1.04	2.52	0.7						1.35	0.5	1.52	0.79
3.81	0.45	2.38	1.11						3.43	0.395485	2.56	0.93						1.85	1.53	1.94	1.29						1.52	0.11	2.14	1.79						0.89	0.35	1.7	0.47						1.73	0.42	1.58	1.13
1.96	1.91	2.26	1.57						3.19	0.374779	3.4	1.16						2.59	0.53	2.68	1.36						1.63	0.58	2.97	1.21						1.94	1.58	2.01	2.4						1.12	2.06	1.69	0.7
2.67	0.79	2.37	0.78						2.42	1.21353	2.23	1.01						2.15	1.67	2.22	1.09						1.33	1.37	2.72	0.83						0.98	0.3	1.95	0.96						0.89	1.3	1.3	1.91
2.48	0.42	3.94	0.78						4.21	0.746504	4.45	0.94						2.65	1.2	2.31	1.58						2.16	1.56	3.3	1.13						1.12	0.23	2.73	0.52						1.56	0.9	0.96	1.01
2.26	1.41	3.48	1.08						4.32	1.32685	2.12	0.81						1.45	0.7	1.88	0.77						1.54	0.19	1.58	1.03						1.75	0.94	1.38	0.82						1.71	0.06	2.24	1.01
2.03	1.51	2.16	0.71						2.25	0.947479	4.52	0.67						1.95	0.88	1.76	0.62						2.22	1.8	4	1.08						0.98	0.25	1.96	0.91						1.48	0.2	1.82	1.27
3.25	0.44	3.85	0.91						3.14	1.5832	2	0.67						2.73	0.64	1.46	1.76						2.17	1.62	2.5	0.9						2.51	1.31	3.54	0.98						1.13	1.11	1.19	0.43
3.16	0.24	1.83	0.65						3.54	1.63178	2.78	0.8						2.12	1.61	1.93	1.34						1.3	1.38	1.36	1.41						2.27	0.71	2.18	1.45						2.19	2.06	1.1	0.66
2.6	0.26	3.54	1.4						1.47	1.15799	2.12	0.87						2.57	0.23	2.35	0.69						1.84	8.18	3.25	1.14						1.6	1.1	2.59	1						1.39	1.25	1.95	1.12
1.82	1.85	2.42	1.54						2.67	1.03876	3.03	0.81						2.73	0.25	2.16	0.65						1.91	0.63	1.32	1.65						1.72	1.48	2.63	0.98						3.95	0.47	1.87	1.26
3.06	0.12	2.41	1.28						1.63	0.2736	1.59	0.55						2.8	0.49	1.43	0.3						1.45	0.26	2.22	1.26						1.42	0.17	2.69	0.65						1.72	2.66	1.23	1.16
3.69	0.82	2.61	1.84						2.91	1.37699	2.69	1.26						3.53	0.33	2.02	1.38						1.21	0.51	2.91	1.61						1.36	0.4	2.29	1.59						1.32	1.63	1.47	0.73
2.38	0.82	2.52	1.06						4.18	1.7142	3.43	1.01						2.59	1.41	2.45	1.25						1.85	0.26	2.2	1.57						2.79	0.76	1.21	0.64						1.33	0.81	1.41	0.65
2.3	1.33	3.46	1.18						2.49	2.46479	1.62	1.36						2.7	0.69	2.61	1.06						5.25	0.48	1.96	1.2						2.13	1.8	2.25	2.03						0.86	1.85	1.71	1.11
2.37	0.59	1.86	0.89						3.85	0.196523	3.44	1.41						1.94	0.65	2.33	1.11						1.82	0.97	1.18	1.26						0.99	0.41	2.48	0.62						1.39	0.68	1.95	0.86
4.02	1.7	2.41	0.97						3.81	1.24328	3.18	0.86						2.33	0.91	2.48	0.62						1.2	1.14	2.38	1.39						1.51	0.18	2.47	0.77						2.02	0.73	1.45	0.55
4.96	1.53	4.32	0.81						3.07	0.626872	3.01	0.76						2.04	0.99	2.12	0.88						2.11	1.67	1.77	1.16						1.49	1.5	2.94	0.99						1.82	2.57	1.99	0.56
2.79	0.2	2.13	1.18						4.37	0.86847	1.71	1.4						2.81	0.96	1.51	1.27						2.56	1.22	2.3	1.02						1.62	0.33	1.5	1.28						1.69	0.14	1.38	1.81
2.4	1.09	2.66	0.72						2.51	1.65815	2.01	0.65						3.25	0.19	2.1	1.58						1.06	1.05	2.08	1.1						1.54	0.94	1.92	0.66						1.71	0.23	1.31	0.65
2.19	0.9	5.64	0.86						2.05	0.232578	1.82	1.63						2.1	0.88	2.12	0.76						2.07	1.25	2.51	0.93						2.71	1.13	2.28	0.77						1.14	1.6	1.38	1.16
2.66	0.86	6.51	0.67						2.23	0.727245	3.87	0.64						2.46	2.08	2.81	1.14						2.19	1.67	2.16	0.98						1.62	1.27	2.13	0.56						1.3	0.95	1.84	1.42
3.19	1.17	3.13	1.51						1.79	1.3847	2.73	0.96						2.06	0.97	2.03	0.55						1.8	1.65	2.27	0.99						2.64	2.51	1.5	0.99						1.69	1.65	1.37	0.72
1.57	0.62	3.49	1.3						3.05	1.23558	2.07	1.14						2.44	0.93	1.43	0.5						1.94	1.72	1.38	1.35						1.76	0.93	1.48	1.27						1.48	1.11	1.22	0.82
4.08	1.02	6.7	0.73						2.36	0.124346	2.54	0.86						2.05	1.36	1.42	0.46						1.49	0.42	3.05	0.88						1.91	1.35	2.2	0.46						1.63	0.1	1.24	2.04
2.01	0.19	2.51	0.82						1.79	1.03316	2.57	0.81						2.68	0.74	1.66	0.67						2.09	1.29	2.68	0.79						1.84	0.93	1.37	0.75						1.84	1.57	1.51	0.99
2.67	1.35	2.07	1.06						2.36	0.154966	1.78	1.39						2.38	1.59	2.89	1.13						2.54	1.51	1.59	0.89						2.44	0.73	2.37	0.64						1.51	0.45	1.07	0.42
1.9	1.7	2.66	1.71						1.63	1.75553	1.77	0.31						1.95	1.31	1.95	0.82						1.93	1.47	1.85	0.75						2	1.49	2.1	0.74						1.63	0.42	1.71	0.81
2.99	1.75	2.18	0.58						2.4	1.0435	1.77	1.24						1.56	0.93	2.04	0.98						1.14	1.03	1.89	0.92						2.67	1.41	1.53	0.56						1.43	0.96	1.05	1.11
3.87	1.33	3.29	1.08						1.41	2.34917	2.65	1.64						3.74	0.29	2.13	0.61						1.77	0.3	2.55	1.34						1.13	1.92	1.66	0.83						1.37	2.3	1.08	0.59
1.66	1.12	4.79	0.96						2.46	0.236438	3.32	0.88						1.91	0.27	1.68	1.04						2.2	1.61	2.24	1.24						1.63	0.29	1.19	0.77						1.94	1.86	1.9	1.21
3.74	1.14	2.77	0.81						3.15	2.22666	2.05	1.22						2.68	0.83	2.09	0.88						1.84	0.58	1.31	0.72						3.42	0.24	1.47	1.67						1.33	0.88	1.17	1.47
1.95	1.81	3.16	1.31						2.28	0.863895	1.91	0.88						1.88	0.71	2.87	0.93						4.18	0.29	2.59	0.82						2.17	1.53	1.64	0.77						1.18	1.24	1.31	1.23
2.4	0.47	3.66	0.84						2.75	0.320953	2.49	1						2.58	1.2	1.24	0.8						2.17	1.32	2.77	0.89						2.81	0.58	1.61	0.46						1.74	1.64	1.3	1.32
3.68	1.65	2.7	0.82						2.1	1.36797	3.11	1.05						2.37	1.29	1.75	1.91						2.37	1.24	2.03	0.83						2.23	0.73	1.68	1.05						1.07	1.28	0.93	0.58
1.45	0.32	4.73	0.74						3.58	0.326391	2.62	1.1						3.39	0.25	2.23	0.64						1.31	1.46	2.11	0.45						1.49	0.29	1.84	0.53						1.92	0.89	1.53	1.36
3.44	0.64	2.39	1.13						3.61	1.24345	2.95	1.09						2.33	0.93	1.66	0.88						1.68	0.13	1.94	0.9						1.95	0.79	1.66	0.87						1.08	0.98	1.25	1.25
2.29	0.9	2.73	1.3						3.24	0.732501	3.3	0.82						2.36	0.94	1.92	0.9						1.71	0.26	2.55	1.01						1.7	0.65	2.29	0.59						1.81	0.88	2.54	0.66
3.1	1.38	3.93	0.82						3.26	0.528842	3.33	1.01						2.56	0.82	1.85	0.99						2.42	1.29	1.57	1.29						1.91	1.01	2.08	0.56						1.24	0.89	1.28	0.77
2.22	0.8	3.36	0.88						1.68	1.26482	3.57	1.58						2.54	1.17	2.23	1.09						1.54	0.66	2.04	0.82						2.77	1	1.48	1.33						1.32	1.06	1.87	1.1
1.91	1.35	2.74	1.34						3.33	0.241492	2.43	0.99						3.84	0.58	2.71	1.17						1.82	0.29	1.86	0.39						1.46	0.47	2.1	0.48						2.01	2.24	1.47	1.43
2.57	0.68	2.51	1						3.39	1.28735	2.93	0.97						2.97	0.55	2.33	0.85						2.6	1.07	1.57	0.72						2.72	0.91	1.69	0.48						1.55	0.24	1.61	0.74
2.71	0.26	5.15	1.54						3.01	0.460584	1.84	0.73						2.82	0.93	2.04	0.86						1.31	1.04	2.87	0.81						2.91	0.67	1.49	0.87						1.32	1.16	0.87	1.36
2.95	1.36	2.74	1.11						2.22	2.10012	2.63	1.06						3.75	0.19	2.31	1.11						1.97	0.88	2.65	1.52						2.99	0.68	1.53	1.08						3.94	0.36	1.59	1.1
1.82	1.62	2.4	0.37						2.97	0.205394	2.55	1.35						2.04	1.02	2.7	1.07						1.78	0.39	1.69	0.65						1.57	1.17	1.52	0.93						2.16	1.51	1.18	0.75
3.21	0.63	3.97	0.91						3.03	0.22519	3.73	1.01						2.74	1.39	2.15	0.83						2.28	1.65	2.82	1.31						1.99	0.75	2.76	1.55						1.25	1.71	1.14	1.48
3.73	1.45	2.82	1.59						2.08	1.88936	3.68	0.98						2.56	0.98	1.91	0.82						1.92	0.77	2.01	0.93						1.93	1.58	3.32	0.8						1.2	0.94	1.11	0.39
1.63	1.47	4.11	0.73						2.05	0.668723	2.32	0.98						3.46	0.76	2.93	0.59						1.35	0.9	1.96	0.95						3.88	0.15	2.26	1.46						2.25	1.23	0.96	1.22
4.17	1.69	5.43	0.73						3.01	0.283782	2.5	1.02						3.17	0.53	2.6	0.98						1.96	0.13	1.86	0.55						1.63	0.56	1.52	2.52						1.53	0.78	1.31	1.35
1.88	2.05	2.88	0.54						3.36	0.802959	2.44	1.04						1.83	0.23	2.38	1.38						1.55	0.46	2.72	0.47						2.2	1	3	1.18						1.58	1.1	0.92	0.4
2.97	0.38	2.66	1.1						2.83	0.056866	3.77	0.67						1.89	0.92	1.82	1.42						2.44	1.12	1.78	1.04						2.14	1.08	2.96	0.53						1.61	0.51	1.82	0.78
3.97	1.15	4.21	0.91						2.59	0.977166	3.05	0.97						1.99	1.79	1.55	0.87						1.2	0.98	2.56	1.1						1.85	0.13	1.82	0.9						1.06	1.85	1.33	0.71
2.3	0.45	2.81	1.33						3.34	0.94426	2.96	0.79						1.13	0.26	2.06	0.65						2.01	0.23	2.75	0.53						2.86	1.38	2.11	0.69						1.91	0.19	1.24	0.48
2.88	0.41	5	1.05						4.36	1.28841	3.01	0.74						1.19	0.11	1.57	0.68						1.63	0.73	1.41	0.61						3.3	0.87	1.94	0.7						1.58	0.48	1.58	1.46
3.35	1.01	3.29	1.4						2.51	1.54466	4.11	1.09						1.41	2.37	2.33	0.51						2.12	0.3	2.72	1.23						1.63	0.45	2.32	0.87						1.77	0.18	1.05	0.93
2.36	0.31	2.86	1.26						2.48	1.60583	2.69	1.46						1.91	1.61	1.7	1.06						1.33	0.51	3.27	0.9						2.43	1.33	1.83	1.2						1.87	0.69	1.45	1.27
3.15	0.37	2.02	1.22						4.45	1.11375	1.88	1.44						2.11	0.53	1.75	1.1						1.44	1.13	2.15	0.87						2.72	1.38	1.84	0.8						1.3	1.03	1.2	0.56
2.97	0.2	2.41	1.09						2.19	1.63591	3.37	1.04						1.65	0.73	1.58	1.01						1.62	0.99	1.99	1.22						2.8	0.5	1.69	0.85						1.63	0.8	1.71	0.93
2.63	1.14	2.75	1						1.89	1.404	2.1	0.89						1.59	1.52	3.38	0.82						2.14	1.18	1.43	0.62						2.09	0.86	1.71	0.57						2.04	1.5	1.8	0.68
4.82	1.32	1.75	0.84						2.75	0.960492	1.91	2.29						3.33	1.47	2.54	0.53						1.31	1.39	1.74	0.91						2.56	1.45	2.31	2.03						1.9	0.21	1.3	0.97
4.15	1.2	2.59	1.51						2.96	1.0941	2.06	1.24						2.18	1.67	2.64	1.03						2.19	1.1	1.85	0.32						3.3	1.1	2.2	1.15						1.56	1.36	1.18	1.03
4.24	1.17	2.42	1.6						2.16	1.14349	1.56	2.12						1.4	0.49	2.76	1.03						2.88	0.69	1.46	1.27						1.98	1.43	2.64	1.26						3.47	0.91	1.55	0.56
2.88	1.27	2.65	0.93						3.48	0.181292	3.15	0.38						1.92	1.38	1.53	0.24						1.73	0.27	2.43	1.14						2.94	0.88	1.93	1.31						1.9	1.68	1.73	0.5
3.71	1.26	1.83	1.07						3.82	1.27988	4.9	1.19						1.15	0.29	1.52	1.33						2.22	1.97	2.25	0.97						2.11	1.18	2.1	0.81						1.16	1.53	1	0.51
3.66	1.07	2.38	1.39						3.32	0.54586	2.06	1.44						1.9	1.49	2.51	1.23						2.29	2.52	2.29	1.53						3.01	1.08	1.52	1.5						1.36	1	1.25	1.34
4.49	0.95	3.59	0.55						4.65	1.17522	4.1	2.15						2.08	0.94	2.66	0.91						2.92	1.24	1.96	1.12						2	0.3	1.74	0.64						1.89	2.09	0.8	0.79
2.25	1.07	3.14	1.04						2.25	0.950921	2.82	0.52						1.76	1.76	2.13	0.56						4.12	0.46	1.67	1.46						2.67	1.48	1.81	0.49						1.89	0.7	1.4	1.36
2.95	0.71	2.26	0.88						3.71	0.706176	3.15	1.51						2.21	2.29	2.53	0.88						1.45	0.51	1.44	1.24						2.77	1.45	1.28	0.37						1.79	0.18	1.57	1.38
2.57	0.57	3.61	0.87						3.07	0.712998	2.69	1.07						2.29	1.97	2.29	1.13						1.88	0.07	1.65	1.35						2.49	1.36	2.07	0.69						1.99	2.07	1.09	0.97
3.42	1	2.22	0.63						4.48	1.568	4.05	0.89						2.32	0.67	2.81	1.26						2.5	0.79	2.63	1.36						3.83	0.26	1.5	1.3						1.1	1.25	1.22	1.25
2.61	1	1.97	0.96						2.74	0.328193	2.16	0.3						2.48	0.96	3.04	1.24						2.19	0.94	2.12	1.15						1.96	1.1	1.73	0.89						1.58	0.24	1.31	1.02
2.96	0.36	2.54	0.81						3.4	1.0218	2.54	0.62						2.43	1.4	1.26	1.12						2.24	0.93	1.73	0.32						1.26	1.22	2.11	0.65						0.89	1.11	1.22	0.56
2.36	0.15	2.73	1.27						3.06	0.27993	1.7	0.88						1.59	1.14	1.17	1.23						2.31	1.41	3	0.85						1.54	1.02	1.94	0.78						1.51	0.8	1.03	0.74
2.51	0.61	2.51	0.79						4.13	1.14729	2.29	1.18						1.6	1.75	1.95	0.49						1.24	1.62	2.89	1.02						1.44	1.14	1.83	2.37						2.14	0.72	2	0.75
4.13	1.28	1.62	1.14						2.99	1.39284	2.34	0.92						2.86	0.21	3	1.15						2.12	0.96	1.95	1.08						2.18	0.82	1.54	1						1.38	1.07	1.06	2.39
3.26	0.9	2.75	0.86						2.35	1.34901	2.01	0.9						2.11	2.04	2.16	1.05						1.67	0.91	2.92	1.15						1.23	0.5	2.59	1.46						1.22	0.9	1.33	0.83
2.93	0.35	1.91	0.68						2.52	0.75297	3.36	1.5						2.52	1.29	1.76	1.04						1.58	0.25	1.76	2.1						1.35	0.47	1.89	1.9						4.67	0.44	1.28	0.95
3.22	0.4	2.26	1.03						2.55	1.23447	2.7	0.83						3.31	0.89	1.77	1.15						1.93	1.05	2.6	0.97						0.82	2.19	1.63	1.89						1.33	0.76	1.61	1.05
3.7	0.84	1.84	0.84						3.19	0.255527	2.68	0.82						2.32	1.3	1.69	0.56						0.95	0.47	3.08	1.14						2.32	1.15	2.43	0.71						1.21	0.86	1.1	1.22
3.25	0.86	1.64	1.12						1.94	1.50508	1.78	0.89						1.85	1.23	1.43	0.55						1.11	0.53	1.52	1.23						1.89	1.45	2.42	0.97						1.62	0.1	2.37	0.97
3.21	0.45	2.47	1.3						1.7	1.43759	3.26	0.94						2.16	1.54	1.98	0.93						1.2	0.54	1.66	1.4						1.45	0.49	2.36	0.76						0.95	0.12	1.36	1.13
3.79	0.28	1.74	0.62						1.59	1.35373	3.27	0.58						2.21	1.91	1.71	0.76						1.52	0.61	1.68	0.79						1.65	0.21	3.43	1.09						3.37	0.63	1.15	0.81
2.7	0.24	3.48	1.6						2.47	0.917495	2.08	1.14						2.13	1.57	4.2	0.63						1.09	1.92	1.81	0.81						1.77	1.1	1.7	1.66						1.72	0.2	1.37	1.14
1.92	1.11	3.03	0.82						2.83	0.826061	2.54	1.18						3.24	0.85	1.91	0.77						2.04	1.19	2.56	0.58						1.74	2.66	2.4	0.73						1.61	0.36	1.04	1.03
3.78	1.65	3.59	1.09						2.46	0.213367	2.95	1.07						2.37	1.3	2.69	1.29						1.41	1.01	2.58	1.17						2.03	1.72	1.76	0.89						1.76	0.37	1.56	0.58
2.84	0.3	4.11	0.88						2.45	0.514472	2.35	0.99						1.91	1.74	1.82	0.63						1.02	1.47	2.87	1.02						1.5	0.07	2.39	2.16						1.79	0.62	1.37	2.06
3.04	1.12	2.96	1.53						1.79	1.87913	3.46	0.74						2.61	1.12	1.76	0.93						1.23	0.24	2.55	1.13						2.14	1.48	1.9	0.47						1.26	1.54	1.06	0.72
3.9	1.3	3.51	1.03						2.77	0.896626	3.66	0.72						2.86	0.19	1.44	0.71						1.51	1.16	2.24	0.89						1.87	1.25	2.42	1.37						1.78	0.5	1.2	0.99
4.64	1.64	2.44	1.27						3.57	1.06204	3.62	1.47						3.51	0.79	2.23	0.48						1.06	0.57	2.89	0.9						3.04	1.23	2.2	0.9						1.62	0.81	1.64	1.38
3.77	1.07	3.41	0.98						1.78	1.19763	2.43	1.1						3.27	0.23	1.58	0.6						1.82	1.07	2.62	1.12						2.3	0.87	1.92	0.88						1.58	0.36	1.56	0.8
2.59	1.54	3.04	0.94						2.29	0.919555	2.22	0.61						2.82	1.02	2.97	0.78						2.09	1.35	1.58	1.54						1.92	1.4	1.89	2.12						1.3	1.24	1.51	1.17
2.61	0.35	2.51	0.86						1.52	1.85227	2.79	0.96						2.71	1.2	3.16	0.92						1.83	1.81	2.05	1.21						2.07	1.08	2.99	0.72						1.49	1.21	0.92	0.84
2.89	0.47	5.25	1						2.61	0.202338	3.15	0.79						2.39	1.34	1.74	1.03						1.38	0.36	3.07	0.55						2.18	0.95	1.92	1.26						1.87	0.23	1.01	1.13
3.13	0.7	1.46	0.85						2.83	0.179073	1.43	0.6						2.62	0.72	1.99	1.28						1.98	1.36	1.83	0.75						1.66	0.41	1.81	0.71						1.36	1.17	0.95	0.52
2.21	0.59	1.74	0.5						3.25	1.14203	2.22	1.44						2.3	1	1.82	0.94						1.74	1.17	2.55	1.03						3.01	0.75	2.93	0.65						1.18	0.52	1.47	1.8
3.19	0.31	2.8	0.92						3.67	1.19594	3.3	1.14						2.01	0.9	2.46	0.88						2.71	0.45	2.22	0.73						2.07	1.06	1.3	0.49						1.65	0.7	1.21	0.38
2.93	0.22	2.19	0.87						2.66	0.280127	3.04	0.79						2.51	1.69	2.08	1.09						1.4	1.11	2.31	0.63						1.44	0.09	2.64	0.77						1.34	0.82	1.12	0.49
3.28	0.61	2.23	0.6						3.04	0.247111	4.94	1.03						3.26	0.41	2.77	1.01						1.39	1.18	2.3	0.82						2.39	0.88	1.8	0.7						1.17	2.09	1.81	1.13
2.17	1.38	2.53	1.19						2.61	0.400243	2.39	0.97						1.66	0.94	2.07	0.51						1.61	0.18	2	0.89						2.8	1.04	1.58	2.07						1.6	1.08	2.01	0.56
2.58	1.3	3.37	0.83						3.15	0.148556	2.21	0.56						1.74	0.79	2.09	0.96						1.5	1.61	2.71	1.17						1.7	1.51	2.56	0.71						1.3	0.58	1.14	0.89
4.01	2.16	2.35	0.75						2.11	1.19996	2.08	0.92						3.17	0.19	2.21	1.06						1.13	1.24	1.74	0.9						1.53	0.35	1.53	0.47						1.73	0.88	1.27	0.65
3.75	1.45	2.63	0.97						4.12	1.36106	3.07	1.29						1.83	2.1	1.58	0.65						1.57	0.42	2.87	1.11						2.56	1.18	2.42	1.05						0.91	1.14	0.9	0.9
3.32	0.24	4.15	0.72						1.61	1.20751	3.86	1.02						1.61	1.23	2.63	0.74						2.17	1.33	2.35	1.27						1.32	1.04	2.21	0.52						1.78	0.4	1.45	0.68
4.06	1.46	1.93	0.8						2.54	0.538895	2.25	0.95						1.74	1.19	2.41	0.99						2.04	0.8	1.81	1						2.32	1.01	1.83	0.85						1.01	0.81	1.6	0.72
3.05	0.9	2.31	0.71						3.41	0.360477	3.03	0.7						1.11	0.14	1.61	0.76						1.85	1.94	2.43	0.83						2.15	0.63	2.38	0.88						0.93	1.23	2.31	0.89
2.18	1.37	2.76	0.6						2.28	0.83671	2.95	0.8						1.61	1.97	1.59	1.13						1.57	0.23	2.42	1.26						2.63	0.99	1.86	0.64						1.87	0.91	1.57	0.71
1.86	0.76	2.41	1.01						3.09	0.291356	2.86	0.72						2.26	1.61	2.36	0.92						2.92	1.02	1.32	0.82						2.22	1.04	2.25	0.49						1.27	2.62	1.22	0.78
2.46	0.74	3.01	0.9						2.62	1.73459	3.04	0.94						1.94	1.73	1.3	1.35						1.44	0.19	1.7	0.62						1.68	1.38	2.31	0.45						1.43	0.96	1.12	1.14
2.43	1.18	3.26	1.06						4.18	1.11058	3.18	1.17						2.43	1.28	2.83	1						2.74	1.19	1.71	0.61						3.23	0.98	1.39	0.73						1.49	2.48	1.77	1.26
3.69	1.21	3.98	0.94						2.31	2.25515	2.8	0.92						2.12	0.38	1.58	1.52						1.37	1.33	1.45	1.01						3.02	0.55	1.59	0.7						1.02	2.12	1.21	1.86
1.8	0.63	3.25	1.19						2.46	0.961165	1.63	0.49						1.46	0.55	2.72	1.13						2.22	1.29	1.44	0.83						2.86	0.74	1.72	0.69						1.59	1.1	1.4	0.61
3.13	0.94	2.72	0.81						2.63	0.991959	3.18	0.83						1.47	2.36	2.24	0.85						1.76	0.56	2.3	1.62						1.84	1.44	1.89	0.67						1.14	1	1.57	1.43
1.66	1.38	2.88	1.12						2.82	0.155317	3.42	0.64						1.25	1.03	1.9	1.28						2.04	1.23	1.63	0.78						2.34	1	1.69	0.92						1.87	0.39	1.06	0.63
3.7	0.8	2.43	1.74						2.25	1.30926	2.42	0.82						2.05	2.11	1.93	0.81						1.82	1.27	2.22	1.11						2.08	2.95	2.15	0.87						1.61	0.46	1.98	0.97
2.21	0.31	2.44	1.22						3.09	0.125194	3.08	0.85						2.57	1.43	2.2	0.71						3.1	0.21	2.49	1.04						2.75	1.52	2.07	1.06						1.9	0.22	1.42	0.85
3.07	1.48	2.78	1.09						2.27	1.28315	2.52	1.28						1.25	0.36	2.26	1.05						2.42	1	1.8	0.96						2.52	1.14	2.14	0.69						1.54	0.69	1.6	1.71
2.23	0.89	2.79	0.64						2.73	0.907423	3.35	1.12						2.21	2.49	2.01	1.1						1.19	1.12	1.72	0.4						1.37	0.6	1.55	0.7						1.28	0.74	0.88	1.39
3.3	1.6	2.44	0.63						3.79	1.11833	2.14	0.66						2.05	2.04	1.61	1.21						1.78	0.85	2	0.9						1.5	0.16	1.25	0.59						1.65	1.05	1.13	0.7
2.82	0.73	3.15	1.06						2.51	1.10234	2.91	0.78						2.04	1.62	1.49	0.55						1.42	0.8	1.91	0.86						2.83	0.63	3.3	1.89						1.99	1.52	1.48	0.69
2.19	0.75	6.38	0.76						2.91	0.294599	1.85	0.89						2.54	1.18	2.9	1.18						1.53	0.57	1.3	0.87						2.44	1.21	1.7	1.7						1.68	0.17	1.72	0.89
2.53	0.92	3.56	1.12						2.87	1.36749	3.21	0.79						2.3	0.77	2.29	1.11						2.89	1.25	2.53	1.25						1.69	0.1	2.5	0.39						1.43	0.68	1.03	1.34
3.04	0.48	4.12	0.54						3.19	0.608267	2.44	0.87						2.44	0.78	1.66	0.79						1.81	0.17	2.25	0.84						2.43	0.9	1.87	0.81						1.39	0.98	1	1.21
2.24	0.19	2.71	0.41						2.4	0.765179	1.81	0.9						2.03	1.88	2.54	1.04						2.94	1.05	2.53	1.6						1.93	0.15	2.17	0.86						1.23	1.32	1.46	0.86
3.84	1.02	2.17	0.68						4.24	0.969741	2.61	1.19						2.23	1.8	1.78	1.17						1.46	0.59	2.09	0.89						3.05	1.21	1.58	1.86						1.16	1.07	1.94	0.76
2.54	0.19	2.08	0.84						3.65	0.586199	1.88	0.68						2.71	0.41	2.53	1.68						1.64	0.32	1.8	0.64						2.45	0.95	2.47	0.32						1.84	1.19	1.13	1.17
5.44	1.56	3.21	0.82						3.37	0.4321	2.65	1.31						2.71	0.76	2.03	0.81						1.42	0.9	2.73	1.16						2.64	1.06	1.44	1.18						1.7	0.2	0.92	0.73
2.21	1.16	2.61	0.81						3.93	0.359167	1.89	0.69						1.53	0.28	2.56	1.31						1.29	0.95	2.2	0.87						2.08	1.47	2.28	0.82						1.06	1.28	1.15	0.86
2.63	0.39	2.27	0.68						3.62	0.524718	3.06	0.89						1.72	0.44	2.65	0.91						2.17	1.2	1.46	1.23						2.12	1.78	1.48	1						1.01	1.39	1.15	1.35
3.62	1.22	1.85	0.98						4.25	1.56343	2.45	0.81						1.31	0.34	1.47	0.85						1.01	1.02	1.65	1.07						0.93	2.13	1.07	0.55						1.14	0.48	1.23	0.79
2.23	0.79	3.63	1.04						3.6	0.775814	3.62	0.64						2.56	1.57	1.78	1.29						1.99	1.12	1.32	0.75						1.93	1.13	2.52	0.66						1.13	1.8	0.96	0.67
3.57	1.5	2.76	1.11						2.67	0.513828	3.49	0.72						2.19	1.7	2.83	1.25						2.24	1.86	1.97	1.18						1.83	0.91	2.73	0.58						1.27	0.9	1.97	0.83
3.2	1.38	3.93	0.93						3.59	1.34281	2.89	1.16						2.47	0.79	1.55	1.04						1.67	0.18	1.41	1.38						1.34	0.16	3.02	0.87						2.02	1.42	1	0.89
2.02	0.95	2.92	0.66						3.47	0.485998	2.02	0.62						3.94	0.67	3.14	0.66						1.54	0.35	1.92	0.65						1.1	0.53	1.58	0.55						1.19	1.96	1.22	0.98
2.15	0.4	4.64	0.91						3.03	0.570203	2.37	1.01						2.27	0.82	1.76	1.49						1.88	0.81	1.45	0.84						3.07	0.19	1.69	0.61						2.04	1.11	1.56	2.15
2.18	0.47	4.32	1.43						3.14	0.228339	2.44	1						2.47	1.2	1.52	0.52						1.96	0.4	1.94	0.72						1.08	0.4	1.8	0.61						2.17	1.5	1.88	1.33
3.25	2.31	3.15	0.82						4	0.487949	3.67	0.8						1.94	0.77	2.77	0.9						1.85	1.39	2.79	0.85						1.44	0.28	2.08	1.77						1.62	1.17	1.09	0.85
2.67	0.3	3.96	0.96						3.87	0.717925	3.24	1.11						2.32	1.39	1.59	0.91						2.23	0.92	2.29	0.51						0.95	0.77	1.88	0.6						1.13	1.67	1.57	0.81
2.24	0.16	4.94	0.83						4.66	2.07114	2.96	0.84						3.17	0.4	1.51	0.59						1.16	1.28	2.23	0.81						1.43	1.48	3.22	1.38						1.49	0.99	1.28	1.83
3.58	1.76	6.72	0.84						2.82	0.293901	3.17	1.06						1.45	0.93	1.36	0.45						1.47	0.99	1.44	1.17						1.57	1.07	1.32	0.51						1.58	0.36	1.37	1.05
2.73	0.07	3.41	1.96						3.76	0.141011	3.32	0.97						1.6	0.18	1.66	1.12						1.79	0.32	2.29	0.41						1.7	1	2.34	0.69						1.18	1.15	1.11	0.57
1.74	2.01	2.43	0.96						3.36	0.484801	2.28	0.91						3.25	0.85	2.09	0.76						2.19	1.3	1.32	0.79						2.33	1.26	2.42	1.35						1.34	1.35	4.44	0.68
4.24	2.14	3.23	1.03						3	1.15932	3.17	2.04						2.85	0.78	1.61	1.08						2.12	0.87	1.95	1.22						1.67	1.11	2.37	0.85						1.33	1.46	1.67	1.24
4.33	1.37	2.44	0.86						1.48	1.19269	2.76	1.41						2.09	1.09	2.27	0.97						1.59	0.49	1.96	1.39						2.69	0.89	2.09	0.46						2.44	1.35	1.12	0.72
3.43	1.34	3.98	0.49						2.06	0.51592	1.59	1.07						2.14	0.51	2.9	0.97						1.64	0.47	3.5	1.04						2.47	1.11	2.69	0.78						1.39	1.96	1.66	0.73
3.31	0.92	2.66	0.72						0.94	1.69372	3.04	0.71						3.33	0.33	1.67	1.36						1.51	0.22	1.92	0.72						1.79	1.37	2.45	0.67						1.08	1.48	1.01	0.5
2.14	0.3	2.95	1.56						1.88	0.888306	3.02	1.17						2.51	1.46	1.5	0.7						2.22	1.71	2.75	1.31						1.58	1.17	2.77	0.75						1.55	0.93	0.99	2.07
3.5	2.09	2.97	0.69						2.85	2.05884	1.74	1.1						2.55	1.1	2.12	0.88						3.24	0.86	2.01	0.87						1.6	2.46	1.23	1.25						1.12	1.5	1.88	0.82
4.27	2.08	2.71	0.77						2.26	0.513265	2.25	0.84						2.71	1.45	2.05	1.14						1.82	2.11	2.34	0.63						3	1.07	1.68	1.12						1.7	0.8	1.88	1.72
1.99	0.48	2.02	1.24						2.42	0.493373	3.46	0.92						2.68	0.37	3.28	0.88						1.3	0.9	2.3	0.73						1.27	0.6	2.6	0.74						1.82	0.19	1.81	0.47
2.24	1.04	1.84	0.5						2.53	0.75087	2.02	0.73						3.15	0.84	1.59	0.81						2.74	1.14	2.45	0.89						2.25	1.22	2.1	0.95						1.4	0.72	1.44	0.81
3.71	1.14	1.73	0.94						1.48	2.9158	2.68	1.1						2.74	0.33	1.72	1.05						1.62	0.72	1.95	0.67						2.33	1.47	3.28	1.6						1.35	0.43	1.15	1.83
1.85	1.46	1.85	1.02						1.61	1.84129	1.6	1.39						2.91	0.7	1.35	0.6						1.4	1.01	2.07	0.88						3.39	0.89	1.66	1.21						0.93	2.4	0.91	0.32
4.07	1.88	2.84	0.72						3.06	0.917019	3.06	1.31						2.5	1.08	1.8	1.52						2.18	0.77	1.89	1.4						2.42	1.5	2.15	0.76						1.86	0.24	1.29	0.59
2.24	0.75	2.69	0.72						2.41	0.670886	2.03	0.67						3.82	0.28	1.44	0.98						1.99	0.92	2.05	0.93						3.5	0.87	1.49	0.83						1.21	0.82	1.85	0.75
2.34	1.25	2.29	1.41						2.94	1.50575	2.88	0.87						1.33	0.58	2.48	1.41						1.73	0.41	2.44	1.04						2.09	3.12	1.4	1.77						1.44	0.14	1.5	0.73
3.05	1.07	3.31	0.87						2.11	1.94141	2.84	0.85						2.91	0.75	2.02	1.29						1.73	0.74	2.27	0.6						1.81	1.32	1.62	1.11						1.13	1.66	1.1	1.6
3.16	1.27	2.56	1.41						3.19	1.95286	3.25	1.14						1.42	0.61	2.56	0.89						2.43	1.89	2.29	1.19						1.96	1.51	2.21	0.59						1.29	1.41	1.03	1.33
3.7	2.23	2.62	1.09						2.77	1.19508	2.73	1.78						2.53	0.47	2.87	1.24						2.21	1.67	1.67	0.93						3.11	0.24	2.32	0.97						1.36	1.15	1.05	0.89
5.5	0.19	2.55	1.23						3.52	1.89259	3.77	1.2						3.25	0.36	1.82	1.04						1.48	0.98	2.35	0.87						2.7	0.79	1.8	0.5						2	1.46	1.67	0.68
3.48	1.34	2.74	0.76						2.65	0.430101	1.79	0.81						1.86	0.24	1.75	0.58						1.95	0.5	1.88	1.01						3.62	1	2.1	1.04						1.16	0.91	1.29	1.91
2.1	2.08	2.23	1.11						2.7	0.297036	1.95	1.01						3.11	1.29	2.47	1.23						3.44	0.33	1.89	0.71						1.55	1.38	1.21	0.4						1.33	0.75	0.96	0.64
3.28	0.17	2	1.01						2.39	1.08966	2.45	0.8						3.11	0.8	2.78	0.97						1.98	1.23	2.38	1.56						2.13	1.03	2.09	0.63						1.33	1.47	1.03	0.93
4.04	1.71	2.55	1.15						3.39	0.434995	3.26	0.7						3.05	0.95	2.75	1.25						2.63	1.46	1.26	0.38						1.79	0.88	1.6	0.84						1.36	1.29	1.15	2.49
4.15	1.74	2.59	1.75						2.24	0.445366	2.19	1.39						2.36	1.71	2.56	0.71						2.26	0.43	2.35	1.1						2.21	1.31	2.43	0.84						1.26	1.74	2.04	1.12
3.84	1.6	1.58	1.61						3.31	2.12709	2.99	1.33						1.5	1.69	2.96	1.05						1.4	0.75	1.27	0.45						3.78	0.6	2.39	2.18						1.9	1.16	1.71	1.23
2.84	1.03	1.46	0.69						2.25	0.930483	1.48	1.26						2.66	1.53	2.63	1.04						2.73	0.86	1.53	1.38						1.49	0.81	1.31	0.46						1.89	1.05	1.42	1.41
3.19	2.12	2.49	1.05						3.73	1.05519	2.59	1.58						3.24	1.06	2.54	1.24						2.37	0.98	1.78	1.13						1.21	0.46	2.23	0.87						1.62	0.24	1.28	1.32
1.9	1.92	3.04	0.54						3.25	0.331442	2.84	0.94						2.94	0.29	2.57	0.91						1.79	0.19	2.44	0.87						1.8	1.46	2.93	1.39						2.6	0.94	2.24	0.03
2.99	0.95	2.34	0.79						1.95	0.958191	2.74	1.03						1.81	1.57	1.83	0.89						3.39	0.59	1.84	0.42						3.45	1.01	1.86	2.92						1.91	2.74	1.35	1.15
2.15	2.66	3.17	0.84						2.4	1.69522	1.69	1.19						2.57	0.17	1.79	1.46						2.18	1.12	2.19	1.04						2.61	1.26	2.46	0.85						1.33	0.67	1.08	1.45
3.17	0.22	2.48	1.43						2.78	0.659	3.27	0.94						3.38	1.21	2.51	1.01						2.03	2.61	1.07	1.02						3.37	0.77	2.69	0.83						1.16	1.19	1.02	0.95
2.85	0.45	2.76	1.59						4.35	1.7386	2.97	1.17						1.71	1.41	2.87	0.95						2.39	0.69	1.5	0.93						2.65	0.95	2.44	0.91						1.32	0.43	1.51	0.98
2.76	0.3	2.4	0.91						4.4	0.462697	2.28	0.81						1.49	0.9	3.01	0.64						2.6	1.08	1.79	0.62						2.12	0.2	2.45	0.69						1.4	0.78	2.45	1.37
3.12	0.55	3.26	0.8						3.63	0.761352	2.44	0.29						2.09	0.78	1.54	0.78						2.83	2.24	2.22	0.88						1.78	0.17	2.31	1.61						1.17	1.37	1.11	0.91
2.9	0.39	3.67	1.37						2.6	1.16261	3.42	0.83						1.38	1.64	3.33	0.78						2.04	1.06	1.79	0.77						2.59	1.01	1.55	0.97						1.43	0.78	1.49	0.92
3.67	3.41	3.63	1.33						3.01	0.889865	3.38	0.74						2.34	1.24	2	0.78						2.06	1.33	1.26	2.26						2.67	0.99	3.1	0.81						1.39	1.43	1.37	1.06
4.04	1.22	3.93	0.64						2.92	0.190342	2	0.8						1.2	0.92	1.56	1.17						1.95	0.19	1.37	1.61						1.48	0.81	1.59	0.68						1.46	0.66	1	1
2.21	1.06	1.65	1.92						3.43	0.257646	2.28	1.09						1.45	1.37	2.25	1.18						1.79	0.21	1.35	1.33						2.58	1.95	1.42	1.41						1.42	0.66	1.09	0.57
7.9	0.8	2.23	1.29						2.8	1.65162	3.08	1.23						2	1.55	1.9	1.18						2.59	0.87	3.44	0.8						3.84	0.55	1.37	0.76						1.34	0.9	1.51	1.15
2.36	0.71	2.8	1.05						2.79	0.564921	2.14	0.65						1.72	0.28	2.45	0.51						2.46	1.35	2.51	1.54						1.56	0.71	3.23	1.41						1.49	1.38	1.19	1.77
4.16	0.92	2.38	0.74						3.48	0.243719	2.39	0.96						2.34	1.54	2.11	0.89						1.69	0.1	3.03	1.08						1.46	1.24	2.02	1.45						1.23	0.81	0.86	1.29
2.93	0.7	2.39	1.44						2.47	1.37128	2.35	1.57						1.29	0.27	2.06	1.24						2.84	1.39	2.96	1.22						1.9	0.85	1.99	0.51						1.07	0.93	1.07	0.99
3.99	1.58	3.25	1.13						4.46	2.77495	2.15	0.99						2.41	1.99	3.35	0.81						4.07	0.28	1.23	1.53						1.45	1.91	1.6	1.76						1.51	0.97	0.98	0.53
4.14	1.01	4.06	0.87						2.98	0.846961	2.56	0.95						1.89	2.14	1.19	0.77						1.59	0.39	2.84	1.32						1.43	0.86	1.82	1.27						1.47	0.51	1.64	0.81
3.52	1.12	2.98	1.03						2.84	0.454009	1.61	1.27						1.55	0.24	2.19	1.02						1.99	1.98	2.63	0.91						1.75	1.48	2.37	0.99						1.95	1.28	1.7	0.38
2.91	0.82	3.72	0.97						2.93	0.662525	2.33	0.76						3.21	1.15	2.48	1.15						2.01	0.29	1.9	0.95						1.34	1.47	1.82	0.92						1.52	1.78	1.83	0.68
2.53	0.73	2.32	0.8						3.89	1.14639	2.36	0.83						2.09	1.79	1.92	0.74						2.06	0.53	2.17	0.73						2.05	0.98	1.72	1.12						1.67	0.94	1.06	0.6
2.73	0.21	4	1.01						2.85	1.57877	2.55	1.06						1.85	1.77	2.42	0.93						1.66	0.2	1.89	0.72						1.93	2.25	1.48	2.5						1.12	1.39	1.07	0.82
2.49	0.7	2.27	0.74						3.64	0.726478	2.51	0.78						2.19	1.33	1.94	0.73						2.25	0.57	1.91	0.81						1.6	1.62	1.84	0.78						1.52	1.04	1.33	0.75
2.79	0.35	2.43	1.13						2	0.883089	2.51	0.74						3.05	1.08	1.79	0.69						1.15	0.37	2.25	0.85						1.27	0.2	1.71	1.06						1.41	1.03	1.45	0.68
2.96	0.75	2.49	0.92						3.41	0.55713	1.67	0.74						2.54	0.95	1.61	1.13						1.49	0.8	2.58	0.94						2.7	0.93	2.32	0.76						1.79	1.34	1.65	0.97
1.73	0.16	2.08	0.62						2.9	0.147101	2.86	1.14						2.05	1.15	2.54	1.48						2.16	0.95	1.96	1.27						1.98	1.25	2.15	1.74						1.67	1.31	1.35	0.54
2.07	0.68	2.93	1.41						1.31	0.740508	2.68	1.23						2.05	0.91	3.46	1.08						1.72	0.52	2.96	0.9						2.15	1.54	1.91	2.49						1.47	0.26	1.05	1.32
2.66	1.45	2.58	1.04						2.02	1.11104	2.46	0.23						1.47	0.26	1.65	0.77						1.3	1.27	1.32	0.75						2.15	1.18	2.51	0.56						0.94	0.79	1.36	1.2
2.28	0.72	2.63	2.04						2.13	0.766882	1.68	1.05						2.07	1.41	1.93	0.55						1.12	0.62	3.65	1.3						2.26	1.27	2.04	1.61						1.84	1.15	1.5	0.89
2.63	0.81	2.29	1.03						1.86	1.10714	3.75	0.88						2.99	0.41	1.7	0.88						2	1.44	2.3	1.06						2.64	0.4	1.65	1.15						1.3	1.05	2.5	0.75
2.98	1.29	3.11	0.84						1.91	1.55778	2.66	1.25						2.72	1.23	1.25	0.74						1.16	0.3	1.43	0.76						3.25	0.51	1.34	0.91						1.6	0.99	0.84	0.49
2.31	0.39	1.92	0.72						2.72	1.14081	2.96	0.85						2.3	1.29	2.17	1.19						0.82	0.8	1.96	0.51						1.92	1.37	2.41	0.69						1.46	1.07	1.68	1.56
3.98	0.68	4.1	0.85						2.12	1.56642	3.39	1.38						2.99	0.78	1.55	0.37						2.38	1.59	1.64	0.95						1.65	0.21	2.29	0.55						1.31	0.73	0.92	0.83
3.19	0.87	2.2	1.01						2.08	1.05354	2.95	1.04						2.77	0.3	1.87	0.98						1.82	1.24	2.32	1.13						2.08	2.15	2.12	0.54						2.07	0.46	1.46	1.23
2.98	1.57	3.39	0.79						1.63	1.99698	2.46	1.13						1.73	0.1	3.05	1.24						1.73	1.55	2.3	0.74						1.71	0.07	1.71	0.37						1.54	0.93	1.43	1.02
2.83	1.09	2.72	0.62						2.63	0.272814	2.75	0.82						2.15	1.03	1.88	0.56						1.42	1.46	2.03	0.7						1.21	0.72	1.75	0.98						1.09	0.57	2.55	0.91
2.2	0.41	4.36	0.85						3.74	1.41911	3.43	1.27						2.72	1.88	2.13	1.51						1.49	0.2	2.96	0.95						2.59	1.49	2.14	0.75						0.99	1.16	0.79	0.59
1.97	1.22	1.9	0.77						2.53	1.31045	2.93	0.98						2.53	0.86	3.34	0.68						1.07	1.56	1.69	1.53						1.73	1.24	2.27	0.71						1.86	0.48	1.17	1.43
2.15	1.38	2.72	1.4						4.14	1.45637	1.97	0.84						2.3	0.79	1.48	0.76						2.16	1.56	2.33	0.91						1.84	0.61	2.39	0.65						1.43	1.27	1.45	0.61
3.96	1.34	2.87	1.67						3.11	0.394493	2.68	1.22						2.53	1.49	2.12	0.82						1.29	0.74	2.23	0.95						3.12	1.11	1.52	1.72						0.67	1.48	1.35	1.56
2.07	1.01	1.68	1.14						3.16	0.306448	2.31	0.83						2.86	0.85	2.19	1.45						1.31	0.94	2.53	1.44						2.72	1.51	2.22	1.18						1.12	0.79	1.53	0.46
2.43	0.09	3.02	0.38						2.35	1.85744	3.25	0.78						1.58	0.21	1.61	1.27						1.76	1.89	2.77	1.11						2.56	1.61	1.4	1.68						1.32	1.35	1.05	0.99
2.82	0.98	2.8	1.3						1.89	1.70906	2.48	0.81						2.89	1.18	2.44	0.41						1.12	1.48	1.61	0.64						1.88	1.01	2.24	0.44						0.87	1.44	1.67	1.09
2.57	0.19	4.27	0.83						2.41	1.28992	2.9	0.91						3.32	0.87	1.59	2.4						1.09	0.02	2.13	1.99						1.92	0.84	2.49	0.76						1.51	0.11	1.16	1.87
2.85	1.75	2.86	1.42						2.43	1.2688	3.55	0.65						3.35	0.18	2.4	1.16						2.04	1.3	1.19	0.84						1.47	1.3	1.81	0.44						1.63	0.53	1.18	1.08
2.53	0.88	3.08	0.79						1.97	2.39507	2.61	1.31						2.03	1.09	2.62	0.87						1.79	1.45	1.89	1.09						1.75	0.41	1.56	0.75						1.74	0.73	2.02	1.34
1.97	0.81	4	0.71						2.44	1.40739	2.86	0.75						2.04	0.32	1.81	1.15						1.23	1.77	1.18	1.69						2.95	0.57	1.8	0.53						1.6	1.21	0.94	1.7
3.4	1.63	3.22	1.37						4.4	0.905232	3.42	0.82						2.39	0.94	1.71	0.61						1.38	0.99	1.56	0.44						1.66	1.21	1.99	0.6						2.01	0.57	2.16	0.74
1.77	0.85	3.62	1.19						2.59	0.452272	2.45	0.64						1.75	0.17	2.28	0.74						2.56	1.21	1.93	0.82						2.11	1.02	1.39	0.52						1.96	1.87	1.04	0.97
2.15	0.88	2.69	0.82						2.45	0.533176	2.9	1.17						2.97	1.18	2.95	0.98						1.23	1.5	1.6	1.15						1.6	0.08	1.78	0.42						1.31	2.15	1.54	1.26
2.56	0.42	3.04	1.1						2.01	2.41398	2.46	1.71						1.77	0.48	2.99	1.16						3.76	0.67	2.15	0.84						2.09	1.31	1.76	2.11						1.47	0.79	1.55	0.84
2.56	1.13	2.99	0.67						1.74	1.60333	3.01	0.8						5.19	0.98	2.04	0.92						1.27	1.29	1.55	0.83						2.1	1.1	2.07	0.88						1.11	0.81	0.89	0.75
2.16	1.58	4.31	0.57						1.39	0.618614	2.7	1.22						3.41	1.18	2.37	0.73						1.58	1.4	2.05	0.88						1.96	0.76	2.19	0.59						1.42	0.72	1.39	1.68
2.23	0.36	2.76	1.07						1.47	0.801482	1.93	0.94						2.19	1.48	2.13	0.41						1.5	0.25	2.29	0.78						1.8	1.09	3.08	0.86						2.06	1	1.39	1.61
2.17	0.82	2.92	1.61						2.75	0.676854	2.01	0.63						5.7	0.98	2.11	0.4						2.4	1.57	2.49	1.65						2.85	0.2	1.92	0.84						1.08	1.67	1.41	1.18
2.52	0.31	3.18	1.16						3.32	0.181082	2.7	1.03						2.19	1.51	2.02	1.2						1.72	1.15	1.42	1.35						1.5	0.85	2.1	0.65						0.95	1.23	1.5	1.15
3.68	1.58	3.15	1.16						3.65	0.210945	3.65	0.53						3.54	0.23	1.8	1.16						1.69	0.21	1.68	0.63						2.27	1.32	1.76	0.59						1.2	1.25	1.32	0.34
2.45	0.51	2.66	1.2						2.07	1.43135	1.94	0.67						3.48	0.56	2.29	0.84						1.76	1.68	2.06	1.22						2.82	0.97	2.27	0.72						2.09	0.84	1.33	1.41
3.02	2.02	2.87	1.67						2.44	0.952421	2.12	1.06						2.87	1.13	2.49	0.87						1.78	0.32	1.34	1.16						1.84	0.87	1.61	0.59						1.67	0.11	1.42	0.59
2.97	0.16	3.65	1.33						2.99	0.224713	2.85	1.02						1.84	0.41	2.98	1.02						2.34	0.87	1.49	1.03						1.83	0.93	2.13	0.95						1.47	0.5	0.87	0.81
2.45	1.13	3.35	0.78						3.23	0.436808	2.61	0.8						1.3	1.77	2.56	1.41						2.35	0.35	1.28	0.68						2.26	1.67	1.97	1.6						1.31	1.22	1.45	0.9
3.37	1.59	3.74	0.67						3.48	1.22913	2.04	0.49						1.85	1.44	2.69	1.15						2.27	0.51	1.86	1.16						2.9	0.75	3.18	1.18						1.41	0.61	1.13	1.19
4.07	1.62	3.16	0.68						2.63	1.00643	3.27	1						1.66	0.91	1.82	1.56						1.43	0.92	1.15	0.78						1.51	0.06	1.64	1.85						1.39	0.86	1.43	1.97
2.79	0.89	2.71	1.35						2.46	1.19369	3.82	0.75						1.69	1.76	1.97	1.21						2.05	0.84	2.79	0.97						3.46	0.05	2.02	1.04						1.53	0.37	1.09	1.22
2.39	0.21	2.86	2.01						2.45	1.37797	2.83	1.07						2.04	0.73	1.61	1.27						2.61	1.39	2.04	0.82						2.22	1.24	1.74	0.56						1.8	0.52	1.24	1.41
2.7	0.57	1.77	0.49						4.26	0.722287	2.66	1.06						1.97	0.85	2.22	0.95						1.98	0.88	3.74	1.37						3.2	1.55	2	1.14						0.98	1.03	1.47	0.98
2.76	1.65	1.88	0.54						3.23	0.504797	2.16	1.2						2.26	0.44	1.56	1.09						1.56	0.74	2.37	0.66						1.61	0.7	1.82	0.94						1.76	0.48	1.44	1.76
3.94	1.17	3.11	1.49						4.16	1.72041	2.43	0.78						1.61	1.36	2.18	0.87						2.85	0.61	2.27	0.6						2.62	0.93	1.89	0.76						1.67	1	0.88	1.5
3.97	0.95	2.07	1.22						2.6	1.36055	1.74	0.86						1.49	0.08	2.61	1.21						1.82	0.17	1.33	1.25						1.83	1.11	2.51	0.8						1.44	1	1.14	1.22
3.13	1.79	2.9	1.36						2.5	0.995019	2.69	0.93						2.19	1.92	1.57	1.14						1.47	0.36	2.91	0.57						3.37	1.88	2.59	2.1						1.05	1.49	1.6	1.05
2.4	0.92	2.66	1.04						4.35	2.06929	3.04	2.18						1.8	0.48	2.18	0.63						2.91	1.06	2.19	0.93						2.14	0.55	1.99	0.46						1.37	0.93	1.63	0.84
2.89	0.92	2.75	0.59						2.52	0.333288	1.99	0.64						1.51	0.27	2.25	0.98						1.31	1.15	1.4	1.36						2.63	0.92	2.22	0.69						1.35	1.25	1.4	0.71
2.7	0.56	3.09	0.76						2.51	0.354569	2.19	1.4						1.21	0.34	1.61	1.3						2.14	0.45	1.59	1.11						1.78	1.25	1.59	1.26						1.35	0.71	1.38	0.93
2.95	0.29	7.51	1.37						6.16	0.94525	2.33	0.52						1.61	1.94	2.29	0.7						1.77	0.69	1.47	1.45						2.18	1.5	3.01	0.4						1.37	1.05	1.82	0.95
1.93	1.03	4.81	0.57						1.94	1.45976	2.66	1.14						1.45	0.39	1.83	0.86						1.65	0.63	2.07	0.96						1.06	2.04	1.89	0.86						1.05	2.31	1.85	0.89
3.21	0.92	3.36	1.91						2.95	1.33768	2.59	0.71						3.15	1.03	1.84	0.39						1.8	0.12	1.84	0.5						1.83	0.96	1.72	1.85						1.81	0.64	1.6	0.89
2.36	1.63	8.35	1.35						2.9	1.55787	1.83	0.38						2.17	1.88	1.43	1						1.51	0.84	2.93	1.09						0.95	0.27	2.42	1.46						1.23	1.1	1.59	1.47
2.97	0.25	5.61	1.41						3.37	1.56723	3.17	0.89						1.7	1.19	2.56	1.07						2.51	2.17	2.68	1.37						2.43	0.21	2.18	1.46						1.39	1.73	1.19	1.38
3.29	0.33	2.35	0.83						4.06	0.933848	2.7	1.12						2.78	0.69	2.37	1.16						2.83	1.87	1.89	1.13						1.97	1.33	1.76	1.77						1.37	1.4	1.35	0.79
2.76	0.47	2.17	0.89						2.51	0.356982	2.87	1.06						2.75	0.23	2.39	1.18						2.04	1.36	2.46	0.69						1.65	0.72	1.4	0.71						1.7	0.3	1.56	1.08
2.38	1.2	3.15	0.78						2.41	0.70635	1.95	0.71						1.7	0.34	2.6	1.52						2.08	1.81	1.57	1.31						1.81	1.76	1.45	0.84						1.69	0.32	1.33	1.29
3.05	0.39	3.34	1.05						2.06	1.82389	2.11	0.81						3.12	0.23	1.81	0.65						2.28	0.72	2.35	1.04						1.75	1.59	2.45	1						1.38	1.24	1.01	0.87
4.25	1.18	3.55	0.58						3.57	1.68334	3.29	1.08						1.66	0.21	2.15	0.9						3.25	0.5	1.66	1.73						1.9	1.35	1.74	1.02						1.52	0.32	1.36	1
2.35	0.72	3.18	0.72						3.65	1.15842	2.51	0.71						3.15	0.38	2	1.3						1.31	1.4	1.86	0.51						1.74	1.21	2.87	0.77						1.16	0.97	1.63	0.73
2.34	1.91	2.96	1.12						3.43	0.824189	1.76	0.67						2.46	0.72	1.84	0.81						1.85	0.18	2.25	0.72						2.52	1.6	2.04	0.85						1.85	2.21	1.49	1.03
3.28	0.98	1.7	1.29						1.9	1.28421	2.04	0.63						2.21	0.9	2.24	1.33						3.26	1.08	1.77	0.67						1.14	1.1	2.46	1.14						0.91	0.53	1.22	2.18
3.88	1.3	1.57	0.6						3.13	0.322378	2.15	1.25						2.12	0.65	1.99	1.07						2.9	1.23	1.34	1.89						1.73	1.29	1.6	0.68						2.81	1.51	1.24	1.03
3.65	2.08	5.45	1.34						2.37	1.90342	3.52	0.99						1.74	0.35	1.73	0.65						1.6	0.97	2.07	1.16						2.48	0.23	1.66	0.43						1.35	1.13	1.05	0.49
2.27	0.77	2.61	0.94						3.27	0.484286	3.29	0.9						3.12	1.01	1.67	0.83						2.78	1.81	2.6	0.73						2.01	0.85	1.98	0.46						1.93	0.2	1.81	0.83
3.11	0.39	2.57	1.23						3.28	0.096424	2.91	1.47						2.45	1.42	2.34	1.09						1.69	1.11	1.59	0.63						2.32	2.43	2.36	0.83						1.62	0.45	1.35	0.68
2.82	0.34	1.97	1.12						1.63	2.10965	2.4	0.98						1.96	1.21	1.78	1.49						1.81	0.99	2.85	0.95						1.63	1.54	1.48	0.91						1.42	2.11	1.47	1.18
3.96	0.12	2.27	1.45						3.44	0.191739	3.99	0.55						3.72	0.55	2.8	0.97						1.9	0.79	1.91	1.25						2.41	1.24	1.81	0.76						1.53	1.14	1.18	1.04
2.86	0.19	2.41	1.3						4.21	0.937466	4.18	0.88						1.59	0.13	2.06	0.62						2.48	1.28	2.24	0.92						1.96	1.65	2.17	0.72						1.97	0.62	1.17	0.93
2.59	0.47	2.38	1.03						3.19	0.267995	3.14	0.81						2.63	1.25	2.07	1.03						1.6	0.39	2.02	0.6						2.82	0.79	1.07	0.49						1.57	0.6	1.71	0.47
2.49	0.77	2.3	1.33						4.37	1.77124	1.75	0.75						3.92	0.18	2.63	1.06						2.18	2.02	3.05	1.02						2.42	1.41	2.51	1.48						1.03	1.96	1.74	0.71
3.03	0.55	2.28	1.16						2.82	0.777459	1.54	3.23						3.45	0.13	2.56	1.16						1.94	0.43	1.6	0.85						2.88	1.02	3.19	0.8						1.51	1.24	1.47	0.54
3.2	0.27	3.56	1.35						4.15	1.05713	2.3	0.66						2.56	1.47	2.12	0.9						2.88	1.49	2.74	0.78						1.87	1.25	2.35	1.52						4.13	0.79	1.3	1.99
3.22	0.49	2.55	0.31						2.62	1.33602	1.52	1.31						1.39	0.39	2.66	0.64						2.21	1.4	1.89	0.88						2.7	0.66	1.56	0.97						0.86	2.19	1.11	1.22
4.61	1.79	1.83	1.09						3.32	0.328623	5.82	1.1						3.45	0.83	2.08	0.93						1.42	0.45	2.13	0.81						3.43	0.26	1.42	0.77						1.13	0.82	1.3	1.47
4.37	1.17	2.65	1.06						3.44	0.219115	2.59	0.82						1.94	0.91	2.4	0.97						1.79	1.26	1.85	0.97						2.6	1.08	2.06	0.43						2.29	1.82	1.6	1.63
2.58	0.18	2.79	1.12						3.31	0.193656	1.94	1						2.28	0.9	2.55	1.31						2.82	1.75	1.58	0.63						2.53	1.23	2.85	0.79						0.97	1.62	1.44	1.04
4.23	1.53	3.5	0.89						3.36	0.339886	6.79	1.11						3	0.61	2.43	0.8						1.96	0.3	1.08	0.9						3.13	1.1	2.84	0.97						2.09	1.02	1.84	1.12
3.46	0.84	2.34	1.45						1.86	0.507684	2.02	1.26						2.61	0.62	2.25	0.78						2.34	1.47	1.72	1.38						3.27	0.65	2.46	0.47						1.26	1.49	1.6	0.99
3.48	1.2	2.24	1.22						2.94	1.52367	3.27	0.92						3.7	0.94	2.6	0.58						1.87	0.37	1.77	0.71						1.96	0.75	2.63	0.52						1.41	0.86	1.34	0.89
3.68	0.44	2.36	0.86						2.56	0.880954	2.24	0.85						2.25	1.11	2.43	0.97						2.4	1.33	1.66	1.37						2.15	1.09	2.04	0.58						1.38	0.57	2.05	1.07
3.57	1.85	3.14	0.81						3.99	1.03785	1.45	1.27						2.87	1.17	2.12	0.75						1.83	1.24	1.34	0.81						2.04	0.18	1.75	1.25						1.72	0.21	0.9	0.87
2.8	0.63	3.25	0.58						4.53	0.754749	2.97	1.02						2.84	1.54	3	0.95						1.24	1.28	1.48	1.21						2.82	1.56	2.23	0.56						1.99	1.67	1.24	0.75
4.06	1.19	3.15	0.79						2.62	0.877816	3.05	1.03						2.99	1.43	1.91	0.67						2.08	1.26	2.18	0.89						2.81	0.77	1.52	0.78						1.58	0.77	0.83	0.2
4.08	1.48	2.69	0.74						2.89	1.68945	2.17	1.23						2.94	0.97	2.57	1.16						1.64	1.42	1.85	1.25						1.5	0.27	2.74	0.72						1.2	1.49	4.59	0.82
4.08	1.36	2.17	0.79						2.2	1.42396	2.95	0.94						2.44	1.42	1.83	1.51						2.87	1.3	2.23	1.45						2.61	0.99	1.61	0.89						1.79	0.49	1.98	0.69
5.8	0.79	3.48	0.87						2.75	0.788237	3.14	1.16						3.04	0.98	2.14	0.95						0.81	1.72	2.31	0.83						1.99	0.13	1.9	1.91						4.11	0.55	1.17	1.29
2.53	0.7	4.03	0.8						2.18	0.708175	2.23	0.95						1.85	0.23	2.5	1.39						2.4	0.84	2.23	0.97						2.75	1.25	1.49	1.16						1.59	0.65	4.16	0.61
3.51	0.88	4.15	0.88						1.63	0.983562	2.13	1.61						2.1	1.11	2.65	0.7						1.41	2.44	1.86	0.94						1.71	0.66	1.16	0.89						1	1.05	1.22	0.96
1.96	1.73	2.44	1.5						1.56	1.42692	1.99	0.71						3.03	1.38	1.85	1.92						1.9	1.56	2.25	1.24						1.62	1	1.71	0.59						1.73	0.35	1.3	0.81
3.2	0.41	3.18	1.42						3.33	1.24172	2.57	1.26						3.29	0.38	2.21	0.86						2.55	0.82	1.23	1.18						2.49	0.76	3.1	0.76						1.33	1.61	1.04	0.65
5.8	0.43	2.31	0.71						1.52	1.41359	3.99	2.93						2.97	0.99	2.5	1.03						1.5	0.56	1.71	0.86						2.28	1.23	2.33	0.81						1.95	1.08	1.21	1.27
2.37	0.39	3.19	1.1						1.96	0.55691	2.68	1.17						2.65	1.45	2.96	1.06						1.29	0.53	1.45	0.89						2.46	1.1	3.08	1.49						1.32	0.99	0.97	0.7
2.54	0.67	2.22	0.49						1.41	1.24866	2.84	1.01						2.79	0.22	2.14	0.69						1.14	0.54	1.35	0.48						2.75	0.81	1.9	0.44						1.12	0.92	0.83	1.19
5.3	1.04	2.78	1.58						1.92	1.26583	2.55	0.95						3	0.98	1.81	0.53						1.35	0.72	1.75	0.79						2.08	0.98	1.71	0.8						1.24	1.11	1.15	1.04
4.1	2.12	3.65	1.71						2.64	0.365605	1.9	1.08						3.03	0.79	2.25	0.86						1.95	1.32	2.81	1.36						1.41	1.61	2.38	1.36						1.75	1.21	1.81	0.61
3.73	1.27	3.37	0.74						3.36	1.30727	2.67	0.99						2.83	1.11	1.47	1.23						2.27	1.43	1.77	1.01						1.24	1.03	3.53	1.07						1.58	1.77	1.03	0.83
2.18	1.7	3.81	0.47						2.21	1.36631	2.57	1.15						1.97	1.09	2.72	0.97						1.32	0.52	2.14	1.37						2.02	0.46	1.3	2.18						1.16	1.5	1.32	0.51
3.17	0.37	4.92	0.97						2.68	0.264203	3.05	0.44						3.53	0.55	1.9	0.43						2.58	0.91	2.03	0.72						1.01	0.82	2.24	0.55						1.96	1.24	1.47	0.53
5.09	0.9	3.67	1.02						2.59	0.918036	3.17	0.77						2.81	0.89	2.55	0.83						1.58	0.18	1.29	1.13						1.03	0.44	2.04	0.61						1.28	1.4	1.63	1
2.83	1.29	1.83	0.77						2.49	0.946407	3.08	0.97						3.57	1.23	2.15	1.42						1.57	0.38	1.21	0.84						1.44	1.17	1.79	0.68						1.45	0.91	2.2	0.81
3.18	1.25	1.71	1.49						2.11	1.54398	2.66	0.9						1.68	1.55	1.61	1.5						2.16	1.74	1.14	1.22						1.8	1.3	1.73	0.65						2.15	1.59	1.14	1.53
1.29	2.05	4.93	0.82						2.38	1.12421	3.06	1.23						1.24	0.89	2.13	0.99						1.53	1.21	1.92	1.15						1.32	0.95	2.03	1.7						2.54	1.03	1.07	0.99
1.76	1.07	3.28	0.88						2.08	1.69913	3.32	1.18						1.67	1.78	1.85	0.49						1.26	0.51	2.35	1.18						2.12	2.09	1.68	0.88						0.99	1.06	1.19	0.47
2.48	0.31	3.84	0.92						2.31	1.0901	2.33	0.85						1.38	1.49	2.27	0.92						1.61	0.75	2	0.6						2.13	1.01	2.04	2.55						1.4	1.83	1.51	0.8
2.46	1.16	2.15	0.75						2.53	0.238078	2.69	0.88						1.64	2.16	2.61	0.97						2.03	1.31	1.76	1.06						2.43	0.35	1.38	2.26						1.18	0.65	1.45	1.24
2.67	1.25	1.78	0.76						2.68	0.706543	2.59	1.22						2.01	1.46	2.55	0.75						0.94	0.45	1.73	0.95						2.55	1.07	2.86	0.42						1.68	0.16	1.45	0.74
3.52	1.12	3.19	1.06						3.07	0.859485	2.38	0.68						2.46	1.3	2.99	0.88						2.21	1.65	2.21	0.98						1.03	0.79	2.29	0.96						1.54	0.98	1.73	1.26
2.34	0.65	2.72	0.76						2.01	1.43638	2.29	1						2.62	0.53	3.02	1.22						1.69	1.1	1.37	0.92						1.66	1.22	1.46	2.02						1.52	0.91	2.08	0.92
4.06	1.72	3.15	1.21						3.06	0.310195	3.13	0.95						2.73	0.66	2.16	0.75						2.35	2.15	1.89	0.79						2.3	1.51	1.98	0.6						1.51	0.52	1.11	1.42
3.59	1.56	3.23	1.34						3.73	1.19833	3.8	0.95						1.93	1.52	1.56	1.21						1.85	0.3	2.49	1.08						2.72	1.3	2.45	1.05						1.06	1.07	1.57	1.64
3.17	1.28	2.79	1.22						2.73	0.398469	2.9	1.28						2.26	1.04	2.96	1.05						2.56	1.4	2.27	0.72						1.09	0.52	2.19	1						1.27	0.74	1.75	0.72
3.08	1.04	3.25	0.94						3.06	1.00137	3.04	1.19						1.68	2.34	2.28	1.33						1.59	1.53	2.61	0.86						1.27	1.07	1.51	0.82						1.02	0.66	0.9	0.99
2.89	1.64	3.82	1.41						3.4	0.126707	4.31	0.72						2.81	0.35	4.3	1.14						1.61	0.21	2.03	0.59						3.42	0.49	1.31	0.99						1.31	0.71	1.04	0.78
4.94	1.42	2.08	1.63						3.5	1.98566	2.82	0.98						2.66	0.39	1.54	0.65						2.92	1.18	2.78	1.16						1.54	0.92	2.29	0.68						0.95	1.9	1.3	0.96
2.29	0.64	1.7	1.34						4	1.25069	2.23	0.98						3.17	1.11	2.04	1						2.73	1.16	2.98	0.98						0.98	2.02	1.56	1.04						1.62	0.28	2.01	0.71
2.51	0.19	4.29	0.83						3.47	1.28181	2.12	1						1.27	0.15	3.24	0.99						1.04	1.65	3.19	1.02						1.64	1.98	2.26	0.41						1.09	1.47	1.1	0.51
4.55	1.23	4.09	0.99						3.73	1.21636	1.95	0.32						2.37	0.72	2.42	1.22						2.1	1.28	2.23	0.72						3.41	0.31	1.58	0.88						1.53	1.49	1.8	1.65
3.14	0.28	2.71	0.97						2.86	0.86095	2.63	1.35						3.21	0.85	2.22	0.79						2.01	0.35	2.89	0.78						1.29	1.51	1.85	0.88						4.22	0.61	1.41	1.15
3.25	0.9	2.22	0.55						2.29	1.35371	4.34	0.92						2.17	0.68	2.43	0.95						1.44	0.26	2.33	0.61						2.63	1.48	1.99	0.93						1.38	1.35	1.53	0.56
2	2.14	3.28	1.24						2.89	0.853636	1.85	0.79						1.47	1.38	1.79	0.63						2.1	1.21	2.11	0.92						2.02	1.44	2.13	2.23						1.75	0.5	1.3	1.17
4.74	0.83	4.18	1.3						2.25	1.32201	1.88	1.38						1.78	0.17	1.45	0.97						2.45	0.65	2.49	0.84						2.05	2.58	1.46	0.61						1.24	0.34	1.66	1.92
2.55	0.38	3.31	1.29						2.21	1.19832	1.68	0.64						1.44	1.52	2.69	1.08						2.59	1.78	2.62	0.72						3.56	0.21	2.19	1.37						1.29	0.96	1.42	0.98
3.02	0.27	2.69	1.34						3.17	0.674771	2.7	0.74						1.86	1.26	1.69	1.17						2.77	0.8	1.49	0.72						1.58	0.37	1.82	0.5						1.49	0.97	0.98	0.88
2.34	1.49	3.16	0.73						2.74	0.147516	1.82	0.59						2.32	1.45	3.09	1.17						2.84	1.29	2.81	0.75						1.98	1.09	1.46	1.19						1.68	0.37	1.61	0.69
4.59	1.15	5.62	0.88						2.91	0.28774	3.29	1.02						2.37	1.57	1.56	0.72						1.85	0.74	2.81	1.2						3.41	0.29	1.53	0.68						1.38	1.14	1.19	2.05
2.69	0.26	2.79	0.88						3.7	1.27678	2.07	0.83						2.72	0.97	1.81	1.39						2.15	1.23	1.38	0.9						2.21	2	3.08	0.78						1.61	0.93	1.81	1.64
4.35	1.66	3.25	0.94						1.91	1.76393	3.95	0.66						2.19	1.42	1.58	1.02						2.77	0.35	2.85	0.87						1.44	0.77	1.68	0.7						1.73	0.8	1.61	1.64
2.86	0.3	5.54	1.57						4.23	1.1718	1.57	0.88						3.03	0.2	2.49	1.05						1.71	0.37	1.72	0.97						1.95	1.06	1.82	1.23						1.56	0.64	0.76	0.57
2.38	0.8	3.44	0.71						2.84	0.937631	1.74	1						2.73	0.43	1.76	0.81						2.11	1.06	2.39	1.1						1.71	0.26	2.3	0.64						1.32	0.58	0.96	2.97
3.83	1.93	2.89	1.12						3.63	0.67538	2.66	0.87						2.79	0.39	2.14	0.79						2.06	0.69	1.82	1.01						2.61	2.02	1.85	0.88						1.68	0.46	1.74	0.62
2.81	0.56	5.29	1.02						2.14	1.89556	3.46	0.93						2.31	1.13	2.05	0.38						1.45	1.32	2.34	0.95						2.36	1.07	1.76	1.25						1.51	2.66	1.3	0.66
3.04	0.39	2.85	1.93						4.28	1.15818	3.25	1.28						3.25	0.42	1.9	0.86						1.89	1.22	2.86	0.75						3.08	1.52	2.05	0.51						1.73	0.09	1.18	1.04
3.58	1.81	3.05	0.86						3.55	1.08645	2.84	0.88						3.82	0.48	2.69	1.42						2.63	1.55	1.35	0.7						2.66	0.8	2.02	0.63						1.73	0.59	1.39	0.55
3.4	0.69	3.79	0.95						2.87	0.571754	3.34	0.95						1.51	0.15	2.4	1.18						1.47	2	1.92	0.69						2.86	1.13	2.53	0.81						1.29	0.67	1.24	0.55
2.56	0.65	3.6	0.76						2.69	0.412308	2.62	1.55						2.37	1.31	2.54	1.33						2.09	0.92	2.41	0.83						2.45	1.14	1.62	2.04						1.78	1.31	1.66	1.32
2.04	1.2	3.57	1.31						2.42	1.49332	2.78	1.05						1.98	0.98	2.37	1.01						2.05	1.59	2.27	1.21						2.41	1.25	2.44	0.69						2.01	0.26	1.16	0.71
2.22	0.78	2.94	1.11						3	0.516812	2.59	0.73						2.22	1.66	2.55	0.99						1.23	2.57	1.64	1.6						2.2	1.53	1.46	0.4						2.12	2.2	1.42	0.75
5.23	0.69	3.01	1.38						3.31	0.578174	1.98	0.84						2.76	1.48	1.99	0.95						1.99	0.64	2.95	1.2						2.89	1.35	1.5	2.76						1.27	1.49	1.36	0.99
2.29	1.38	3.22	0.7						2.12	1.68698	2.2	0.85						3.22	0.3	2.01	1.31						1.92	0.2	1.85	1.29						2.4	0.75	1.97	2.09						1.84	0.2	1.28	0.43
4.28	1.41	3.53	1.14						2.11	1.52192	2.13	1.51						1.95	1.09	2.27	0.94						2.8	0.75	1.46	1.4						1.93	1.74	2.75	1.94						1.17	1.25	1.93	0.78
1.83	1.97	2.79	0.94						2.69	0.452139	2.48	1.05						1.99	0.09	3.14	1.03						2.12	1.7	2.67	1.34						2.45	1.12	1.94	0.72						1.16	2.24	1.41	1.41
3.24	0.6	2.86	1.29						3.45	0.23026	2.85	1.41						2.8	1.26	2.38	0.78						2.77	1.16	2.89	1.06						1.71	0.56	2.28	2.01						1.59	0.6	1.76	1.71
2	1.05	3.55	1.12						2.51	1.09229	2.38	0.98						2.46	2.13	1.93	0.95						2.02	1.09	2.09	1.53						1.84	1.29	1.68	0.77						1.89	1.84	1.63	1.01
4.58	0.86	2.69	1.18						3.87	1.05318	3.56	0.8						2.77	1.17	1.7	0.83						2.05	1.6	2.52	0.8						1.88	1.07	2.02	0.79						1.37	2.46	1.21	0.84
3.84	1.26	2.29	0.82						2.64	1.2547	3.84	1.45						2.38	1.2	3.2	1.22						1.88	1.64	3.28	1.24						2.05	1.06	1.85	0.63						0.94	1.07	1.42	1.05
1.77	1.55	1.58	1.05						2.82	0.352043	2.86	1.26						2.03	1.17	2.09	0.76						1.14	1.59	3.2	1						2.61	0.98	1.74	1.31						1.17	0.63	0.97	1.22
3.66	0.67	2.57	0.75						3.55	0.259825	2.34	0.84						2.57	1.05	1.96	0.93						1.59	0.11	1.71	1.05						2.16	0.84	2.12	0.78						1.62	0.37	1.45	3.14
2.65	0.74	2.79	1.06						3.32	0.231432	3.18	0.9						2.21	1.13	2.63	0.84						2.04	0.67	2.03	0.96						2.83	1	1.44	2.43						1.11	2.12	1.43	0.56
1.81	1.04	4.2	0.81						2.83	0.690075	2.27	1.34						2.02	1.75	1.87	1.29						2.26	1.13	1.5	0.59						2.71	1.79	1.71	0.84						1.27	1.89	1.29	0.75
2.43	1.32	3.44	1.09						3.38	0.266306	2.42	0.88						3.32	0.85	2.42	0.88						2.22	1.74	1.33	0.98						2.06	1.68	1.89	2.93						0.93	1.51	1.26	1.21
4.53	1.09	3.27	1.04						2.59	1.60289	1.33	0.9						3.53	0.7	2.63	1.21						1.22	0.67	1.02	1.22						4.49	0.42	2.3	0.38						1.51	0.88	1.4	1.04
2.24	1.04	2.03	0.26						3.29	0.356718	3.43	0.93						2.05	1.47	2.78	0.84						1.89	0.11	1.75	0.5						2.76	0.85	1.11	1.42						1.86	1.31	1.16	1.53
3.41	0.24	1.74	0.52						1.84	1.62934	2.51	1.5						2.22	1	2.32	1.44						2.11	1.35	0.92	0.74						1.97	0.44	1.58	1.01						1.86	1.16	1.16	1.62
2.45	1.89	2.37	0.89						2.35	0.246373	2.01	0.52						2.27	0.86	2.56	0.93						2.23	0.99	1.6	0.69						1.48	0.44	1.69	1.51						1.98	1.13	1.78	1.26
3.35	0.2	2.36	0.67						2.99	1.14234	2.56	1.25						2.86	0.47	2.41	1.39						1.5	1.59	1.84	0.74						1.21	0.32	1.18	0.24						1.38	0.51	1.04	0.61
3.37	0.47	1.9	0.61						2.14	0.733711	3.09	1.01						3.06	1.98	2.4	1.35						1.1	1.29	2.4	0.92						2.09	1.26	2.01	0.8						1.73	0.19	1.76	0.96
2.64	0.29	4.95	0.54						2.16	1.81804	2.59	1.06						2.23	0.51	2.65	1.08						2.44	1.23	1.64	0.82						1.38	0.9	1.57	1.21						1.29	0.44	0.95	1.07
4.16	1.44	2.9	1.02						2.54	1.40648	2.52	1.07						2.48	1.3	3.83	0.76						2.04	0.96	0.99	0.94						2.49	0.84	2.05	0.67						1.09	0.83	1.93	0.64
2.3	0.18	3.57	0.84						3.02	0.249283	1.85	0.9						2.61	1.6	2.21	0.87						1.6	1.45	2.36	0.92						1.23	1.91	2.54	0.35						0.89	1.77	1.61	1.12
2.23	0.18	3.02	0.78						2.47	0.705502	2.8	1.2						2.55	1	3.33	0.93						5.42	0.66	2.16	1.13						1.28	0.35	3.24	0.57						2.16	1.03	1.77	1.21
2.68	0.36	3.15	0.54						2.38	0.429408	3.14	0.85						3.34	0.8	1.5	1.1						1.93	0.37	2.79	1						1.2	0.85	2	0.5						1.71	0.63	1.16	1.28
2.8	0.53	4.22	0.67						2.03	1.49118	3.65	1						1.02	0.11	2.75	0.99						2.92	0.66	2	1.21						2.16	2.05	1.46	0.42						1.97	1.44	1.42	1.13
2.9	0.34	1.76	0.84						2.78	0.33871	3.85	0.73						2.21	0.33	2.02	1.25						1.43	1.24	2.18	0.47						2.55	1.13	1.62	0.6						1.36	1.97	0.81	0.44
2.86	1.27	2.29	1.5						2.51	0.487659	2.41	1.14						2.77	0.4	2.01	1.6						1.67	0.18	2.02	1.25						1.47	0.14	2.67	0.89						1.45	0.24	1.07	2.19
2.48	1.48	1.65	0.51						1.91	0.88466	3.23	0.8						1.87	1.84	2.63	0.68						1.36	1.47	1.44	0.72						2.55	1.1	2.96	1.4						1.73	0.34	1.11	0.78
2.84	0.25	2.89	1.2						2.41	0.390938	3.51	1.01						2.11	0.84	2.48	1.15						1.47	1.1	1.29	0.61						1.6	1.15	3.03	0.52						1.36	1.29	1.4	0.61
2.84	0.64	1.73	0.9						1.92	1.39019	6.45	1.13						1.11	1.9	2.58	1.06						2.27	0.97	2.17	0.87						2.4	0.36	1.92	0.79						1.74	0.13	1.52	0.73
2.61	0.83	2.21	1.41						2.85	0.464831	3.51	0.6						1.47	0.96	2.78	1.02						1.87	1.28	2.17	0.86						1.8	1.76	2.72	1.62						1.01	1.12	1.52	0.72
2.58	1.57	3.28	1.3						2.76	0.700032	3.03	1.38						2.39	0.58	2.52	1.3						1.55	1.87	2.26	1.02						1.42	0.71	1.58	0.84						1.08	0.98	1.21	1.31
2.76	0.35	2.91	1.08						1.45	1.53002	2.34	0.45						2.16	1.14	2.07	1.2						2.27	1.61	1.8	0.6						1.82	1.46	1.63	1.36						1.91	1.08	1.32	0.29
3.23	0.69	1.72	0.73						3.13	0.248675	1.82	0.84						1.31	0.48	2.25	1.68						1.67	1.39	2.62	1.07						1.45	0.15	2.58	2						1.33	1.45	1.15	1.13
4.16	0.96	4.46	1.15						2.44	0.467514	2.65	1.16						1.57	0.79	2.21	0.76						1.48	0.8	1.43	1.3						1.9	0.19	2.52	1.77						1.18	0.97	1.71	0.56
3.52	1.9	2.06	0.62						2.98	0.95926	2.13	0.45						2.5	1.19	2.55	1.47						1.53	0.35	1.77	1.07						2.19	0.82	1.83	1.74						1.7	0.1	1.07	0.45
2.92	0.42	2.84	0.85						3.55	0.293165	2.81	1.37						1.47	1.25	1.96	0.44						1.32	0.14	1.86	1.16						2.34	1.59	1.48	2.39						1.51	1.01	1.13	1.14
2.94	0.89	2.29	0.53						3.2	0.548798	3.64	0.72						1.36	0.33	2.47	1.03						1.45	0.1	1.31	1.23						2.27	1.02	2.06	0.75						1.59	0.39	1.61	0.64
3.62	2.05	1.92	0.68						2.6	0.276422	3.73	0.77						2.08	1.54	2.27	0.93						1.4	1.77	1.69	1.21						2.4	0.67	1.5	1.24						1.83	0.19	1.04	2.21
5.64	0.85	2.9	1.19						3.94	1.01622	1.98	0.71						1.8	0.99	1.41	0.67						1.13	1.43	1.65	0.54						1.84	0.23	2.74	1.38						1.27	0.85	0.98	1.43
2.56	2	2.34	0.91						3.43	1.27816	2.3	1.27						2.92	0.68	2.9	1.28						1.45	0.37	2.34	0.55						2.72	0.76	2.34	0.65						1.38	1.03	1.39	0.62
2.2	1.34	3.08	1.02						3.7	1.40601	2.29	0.8						2.18	2.45	2.27	1.01						1.33	1.26	1.73	0.66						2.69	1.56	2.25	0.87						2.11	1.01	1.58	0.74
3.4	1.7	2.22	0.87						4.28	1.35296	2.52	0.89						2.61	2.18	2.37	1.06						1.62	0.97	2.36	0.97						2.43	0.8	2.25	0.57						1.25	2.3	1.46	1.11
1.31	1.58	4.05	1.19						3.51	0.135464	2.6	0.88						1.77	0.91	2.47	0.91						1.36	1.16	2.59	0.93						2.44	1	1.32	1.73						1.33	1.24	1.64	1.14
2.55	0.36	2.47	1.47						3.42	0.354978	2.82	0.43						2.88	0.47	2.92	0.93						2.46	0.78	2.68	1.67						1.78	0.87	2.09	1.53						1.33	0.63	1.46	0.93
2.54	0.97	3.79	2.03						3.33	0.234309	2.77	0.59						2.29	0.83	2.14	1.3						1.38	0.27	2.37	1.42						1.75	0.93	1.74	0.77						1.21	0.84	1.17	0.68
2.58	0.51	3.46	0.83						1.44	0.232575	2.56	1.12						2.97	0.62	1.47	0.96						1.52	0.38	1.75	1.03						1.93	0.85	1.53	1.15						2.13	1.36	1.55	0.94
2.32	0.24	4.46	1.09						3.32	0.379377	4.73	0.96						1.5	0.47	2.37	0.87						1.84	1.84	1.66	0.54						3.4	1.28	2.65	0.99						1.27	0.39	1.11	0.83
3.29	1.06	1.76	0.89						2.15	1.46471	1.83	0.76						2.32	0.72	2.38	0.93						1.34	1.26	1.27	0.76						2.55	0.82	1.92	1						1.9	0.58	0.97	0.4
2.01	0.19	2.06	0.71						2.01	2.05385	1.63	2.43						3.43	0.3	2.67	0.72						1.58	0.37	2.82	0.66						2.92	0.99	4.73	0.63						1.24	2.18	1.16	0.53
2.73	1.21	2.15	0.66						2.18	1.64157	2.16	1.13						1.98	2.54	1.53	0.95						1.22	0.3	1.75	0.69						2.56	1.22	1.88	0.49						1.25	0.61	0.99	0.61
2.15	0.27	2.42	0.79						2.29	0.866325	2.83	0.99						2.23	2.29	2.01	0.85						1.74	2	1.87	1.16						2.37	1.28	2.06	0.89						1.48	0.56	1.55	0.64
1.61	1.06	2.69	1						3.69	1.66903	2.68	0.95						1.87	1.89	1.72	0.96						1.08	1.22	2.67	0.71						3.24	1.22	2.9	0.44						1.67	1.09	1.3	1.53
2.11	1.65	3.57	0.74						2.94	1.00825	2.7	1.42						2.92	0.23	2.14	0.64						1.35	0.46	2.05	0.59						2.46	1.08	1.77	0.65						2.07	0.99	1.54	0.94
1.51	0.5	3.02	0.92						2.59	1.30744	2.43	0.88						2.48	3	1.78	0.71						1.67	0.92	3.09	1.16						2.45	1.58	2.41	0.59						1.74	0.46	1.88	1.95
2.29	1.1	2.41	1.28						4.25	1.04609	2.18	0.81						4.29	1.31	2.51	1.38						1.84	1.35	1.9	0.77						3.11	1.71	1.57	0.86						1.21	1.96	1.25	0.99
2.79	0.36	2.28	0.99						2.52	0.775849	1.72	0.7						2.07	1.12	2.82	1.39						2.2	2.14	2.49	1.14						2.94	1.22	1.55	0.62						1.85	0.5	0.88	0.71
2.96	0.22	2.77	1.02						4.12	1.20271	2.44	0.94						3.08	0.57	3.3	1.17						2.34	1.87	2.12	0.91						1.33	0.41	2.09	0.89						4.72	0.61	1.19	1.05
2.46	0.31	2.4	0.58						5.04	1.4849	2.76	1.89						3.28	0.46	3.78	0.53						1.75	1.41	2.76	1.23						2.87	1.36	1.67	0.62						1.54	0.33	1.41	1.4
3.12	0.26	2.93	1.65						1.95	0.803911	1.92	0.87						2.91	0.56	2.23	1.14						4.69	1.4	2.55	0.97						1.75	0.33	2.56	1.77						1.57	1.41	1.06	0.47
2.39	0.86	5.15	1.02						2.59	1.8475	3.63	0.83						2.53	1.07	1.94	0.82						2.22	0.98	3.08	1.2						1.86	0.21	1.66	0.53						1.2	2.69	1.04	0.97
3.01	1.02	2.75	0.49						1.98	1.73903	2.07	0.86						2.42	1.64	2.41	0.9						1.58	1.49	2.17	1.22						1.52	0.46	3.07	0.76						1.1	1.75	1.4	0.61
3.38	1.61	2.98	1.15						3.88	0.93271	4.04	0.92						1.77	1.62	2.66	1.66						1.58	0.15	2.29	0.68						3.03	0.79	1.99	2.7						2.13	1.1	1.51	0.99
2.19	0.98	2.78	0.78						2.36	0.985126	2.72	0.99						1.8	1.3	1.63	0.98						2.02	1.95	3.23	1.02						1.85	1.62	1.91	1.31						2.05	0.17	2.49	0.32
2.77	1.08	4.55	1.32						2.28	0.897968	3.46	0.9						1.91	1.02	2.27	0.99						1.37	1.39	2.45	0.84						1.58	0.19	1.83	0.66						1.79	0.12	1.01	1.48
4.01	1.72	2.82	1.7						2.29	1.65009	1.86	0.73						2.19	2.05	2.87	1.53						1.47	0.67	1.67	0.97						1.75	0.34	1.61	1.17						2.02	1.16	1.31	0.92
2.34	0.75	3.8	1						2.56	0.130805	1.9	1						1.93	0.38	3.06	0.92						1.29	2.18	2.46	1.31						2.7	1.34	2.41	1.15						1.83	0.89	1.06	0.51
2.66	0.15	5.03	0.95						2.79	1.42155	2.7	1.16						1.21	2.28	2.68	1						1.73	0.57	2.06	0.86						3.05	0.75	1.45	1.47						1.24	1.11	1.3	1.07
2.42	1.11	2.35	1.09						4.2	0.881405	2.48	0.98						2.66	1.22	1.76	0.6						1.42	1.03	2.48	1.08						2.74	0.89	1.85	1.12						0.97	1.34	1.09	0.82
2.44	0.21	3.17	1.07						2.95	1.76314	2.06	0.92						2.54	1.1	2.92	0.97						1.88	1.51	1.72	1.17						1.66	1.54	2.03	1.79						1.55	0.16	1.58	1.4
2.18	0.84	3.71	0.79						2.61	0.900835	2.4	2.7						3.78	1	3.03	0.95						2.06	0.56	3.35	0.83						1.63	1.21	1.38	1.81						1.29	1.76	1.22	1.49
4.24	0.81	3.62	0.84						3.01	0.263883	1.9	1.02						3.44	0.19	2.23	1.62						2.41	1.35	1.43	1.67						2.41	0.8	3.49	1.26						2.32	0.96	1.12	0.68
2.19	1.77	3.58	1.27						3.73	0.165988	6.39	0.81						2.07	1.3	2.49	0.79						2.58	1.15	2.77	0.79						2.95	1.41	2.55	0.89						1.94	0.2	1.91	0.96
2.11	0.86	2.73	1.31						3.24	0.308304	3	0.81						1.99	1.68	3	0.89						1.85	1.91	2.61	1.43						3.01	1.24	1.76	0.85						1.28	0.39	1.43	1.28
3.79	1.65	3.11	0.87						2.82	1.46535	2.66	1.33						2.53	0.99	1.72	1.22						1.74	0.48	3.32	1.24						1.98	1.42	2.52	2.42						2.01	1.1	1.12	1.67
3.67	1.38	4.34	0.92						3.68	0.130801	3.23	0.84						3.73	1.63	1.54	0.85						2.14	1.43	2.34	0.76						1.99	0.4	1.68	0.66						2.17	1.38	1.37	0.96
3.49	0.95	3.51	0.84						4.16	0.908292	3.06	0.92						3.46	0.36	2.58	1.28						2.97	0.86	2.07	1.1						1.64	0.47	1.36	1.72						1.31	1.34	1.06	1.04
1.5	2.06	2.55	0.85						2.96	2.0989	3.61	0.94						2.67	2.66	2.22	1.23						1.23	1.59	2.24	0.6						1	0.2	1.72	1.44						2.66	1.58	1.31	1.15
2.51	1.32	1.81	0.85						3.7	0.406279	1.88	0.81						2.36	0.53	2.01	0.95						1.95	2.01	1.93	1.01						1.84	1.32	2.1	0.95						1.28	1.05	1.57	0.57
3.11	0.26	3.68	1.55						1.94	0.596481	3.01	0.84						1.39	1.82	2.4	1.25						2.81	1.75	1.89	1.02						1.14	1.76	2.02	0.84						1.58	2.27	1.58	1.22
3.23	1.18	2.58	1.53						1.98	2.58548	3.29	1.18						1.17	0.36	2	0.88						2.02	1.53	1.79	0.53						1.64	1.45	1.35	0.79						1.62	0.06	1.05	0.42
2.88	0.29	3.75	1.2						1.46	1.75698	2.16	0.71						1.98	0.08	1.85	1.01						2.18	1.51	1.98	0.95						1.24	0.59	1.56	0.53						1.68	0.42	1.36	1.76
2.37	0.5	1.78	0.97						2.95	0.674223	1.77	0.76						1.47	0.36	2.03	1.03						1.2	1.69	1.53	1.59						1.2	0.83	1.84	1.13						1.23	1.27	0.79	0.28
2.38	1.32	3.64	1.05						2.61	0.183744	2.26	0.95						1.5	1.99	2.4	1.03						2.91	0.99	2.41	0.99						2.1	2.02	2.11	1.69						1.34	1.09	1.11	0.56
2.46	0.67	2.68	0.84						3.69	1.13046	2.6	0.95						1.87	2.04	1.93	0.96						1.91	0.8	1.86	1.16						1.98	0.89	1.4	0.57						1.21	1.33	1.64	1.17
2.65	0.64	1.32	1.12						3.84	1.6359	1.89	1.15						2.33	1.02	1.67	0.72						2.23	2.58	2.2	1.08						2.24	1.45	2.31	0.59						1.21	1.83	1.31	1.44
3.29	1.32	1.98	1.64						2.7	0.418459	2.23	0.88						1.33	0.35	1.55	0.81						1.6	0.21	2.01	0.8						2.14	2.04	1.52	0.68						1.32	0.75	1.72	1.09
2.86	1.22	1.91	0.38						2.31	0.770362	3.02	0.69						1.5	1.2	1.91	1.2						1.38	1.06	2.29	0.94						1.35	0.87	2.66	0.68						1.21	0.98	1.32	1.39
2.56	0.62	2.71	1.41						3.12	0.827627	2.89	0.74						2.17	1.44	2.49	0.74						2.68	1.47	1.27	1.21						2.38	1.11	1.7	2.23						1.94	0.49	1.17	0.54
2.63	0.45	1.75	0.88						5.38	0.377088	2.28	0.89						1.59	0.4	2.34	0.69						1.97	1.46	1.13	0.83						2.94	0.9	2.56	1.42						1.98	0.16	1.01	0.86
2.86	0.94	2.45	1.2						2.6	1.22727	2	0.92						2.7	0.29	2.6	1.02						2.22	1.49	1.99	0.57						2.54	1.1	1.17	0.64						1.54	0.14	1.32	2.56
4.91	1.96	2.24	1.24						2.3	0.640368	3.35	1.78						2.15	1.39	2.73	1.05						2.5	1	1.95	0.38						2.17	1.62	2.26	1.48						1.83	1.69	1.47	0.97
3.36	1.13	2.42	2.02						3.15	1.6362	2.1	0.66						3.11	0.36	1.79	1.13						2.09	0.87	1.82	0.71						1.58	0.48	1.56	0.75						2.07	1.19	1.15	1.17
3.57	0.68	3.13	1.33						1.5	1.97392	2.77	1.03						1.64	1.01	2.2	0.43						1.68	1.42	2.44	1.05						1.88	0.49	2.05	0.62						1.51	0.43	1.98	1.02
2.77	0.46	1.67	0.81						3.48	1.05181	3.48	0.95						1.22	0.23	2.9	0.69						1.78	0.71	2.04	0.47						2.22	1.85	2.05	0.62						1.54	0.25	1.66	0.87
2.36	1.82	2.63	0.92						2.84	0.1707	2.43	1.08						2.58	1.33	2.22	1.43						1.77	0.87	2.29	0.9						1.25	0.74	3.01	1.31						1.99	1.95	1.14	0.98
5.3	1.27	3.21	0.71						2.79	0.900923	1.65	0.95						2.13	1.1	2.46	1.34						2.16	1.76	2.23	0.8						1.85	0.89	1.62	0.34						1.32	0.99	1.2	0.82
3.78	1.19	3.73	0.99						2.02	1.00913	2.64	0.95						1.54	1.16	1.56	0.79						1.79	1.16	2.32	0.76						1.65	1.08	2.65	1.25						0.92	0.59	1.41	1.29
2.24	1.33	3.64	0.94						5.88	0.814663	2.97	1.24						2.25	0.7	2.11	1.29						2.29	1.71	2.36	1.18						3.35	0.22	2.38	0.88						1.19	1.58	1.4	1.24
5.73	0.89	2.4	0.65						3.46	0.893838	3.25	0.61						1.77	1.09	2	1.08						2.56	1.63	2.2	0.69						1.82	0.13	2.34	0.9						1.35	1.06	1.85	1.5
3.15	0.24	3.2	1.32						4.54	0.727581	3.09	0.71						3.33	1.33	2.48	1						2.64	1.92	2.43	1.36						2.26	1.2	1.98	1.45						1.63	0.25	1.21	0.48
2.44	1.34	2.97	1.62						2.81	0.166341	1.92	0.85						2.61	1.47	2.36	0.79						1.31	0.36	0.92	0.63						3.03	0.51	2.24	1.84						1.08	1.79	1.58	1.08
2.56	1.13	2.95	0.86						3.35	0.323013	1.83	1.72						1.45	0.95	2.25	1.35						2.25	0.08	2.23	1.01						1.53	1.54	2.36	1.87						1.43	2.83	2.08	0.8
2.84	0.4	3.59	0.73						4.25	1.51304	1.13	1.3						2.03	1.14	2.52	1.33						1.71	0.55	1.69	0.9						2.45	0.96	2.18	1.03						1.96	0.26	1.59	1.21
2.71	1.39	2.64	1.33						3.89	0.686892	2.64	1.22						1.94	0.85	2.13	0.82						2.01	0.41	2.77	0.82						2.48	0.86	2	1.01						1.22	0.99	1.54	0.72
4.72	1.35	2.29	1.27						3.42	0.196566	3.47	1.11						2.31	1.25	2.54	1.82						2.64	0.81	2.03	0.93						1.57	0.76	2.13	0.85						1.97	0.91	1.04	0.45
2.64	0.21	2.96	0.73						2.51	1.52048	2.61	0.7						1.92	0.8	1.62	0.97						2	0.16	1.59	1.32						1.69	0.33	2	0.83						1.55	0.77	1.03	1.41
2.1	1.26	1.48	1.32						4.2	0.29365	3.45	1.26						2.3	1.99	1.8	0.7						1.49	0.43	2.21	1.63						2.7	1.05	1.2	0.26						0.95	1.54	1.67	0.99
2.83	0.28	4.35	0.87						3.33	0.341719	2.29	0.86						2.44	1.57	2.76	0.72						1.37	1.1	1.8	1.16						1.73	1.53	1.91	0.38						1.31	1.98	1.12	2.45
2.65	1.42	4.19	0.59						2.4	0.570242	2.32	1.08						3.48	0.22	2.87	0.96						2.93	1.2	2.24	0.96						3.08	0.32	2.26	1.08						1.83	0.79	1.61	0.98
3.88	1.86	2.68	1.02						2.52	1.2447	1.67	1.33						4.08	1.59	2.16	0.37						1.65	0.2	2.08	1.08						2.42	0.85	1.87	0.54						1.75	0.68	1.51	1.09
3.14	0.38	3.27	1.34						2.82	0.188977	3.11	0.87						3.26	0.18	2.54	0.78						2.27	0.82	2.04	0.85						2.61	0.8	1.4	0.95						1.54	0.25	1.68	1.18
4.06	1.26	4.5	0.75						2.98	1.00008	2.24	0.92						2.83	0.53	2.97	1.29						2.09	0.75	2.15	0.75						1.85	1.1	1.91	1.19						1.32	0.62	1.73	1.21
3.32	0.2	2.8	1.22						2.35	1.24721	1.76	1.11						2.1	1.32	1.79	0.69						2.34	0.94	2.53	0.89						3.11	0.55	1.69	2.14						1.21	0.81	1.7	0.98
2.99	1.69	3.01	1.37						3.69	0.223998	4.01	2.04						2.1	1.28	2.65	1						1.83	1.1	1.2	0.27						1.39	0.64	2.2	0.87						2.22	1.68	1.24	0.93
2.48	1.16	2.23	0.77						2.83	0.834546	2.13	0.72						1.94	2.04	1.57	1.61						1.8	0.37	1.23	0.82						1.66	0.62	2.04	0.72						1.31	0.63	1.62	1.94
4.58	1.58	1.95	0.98						4.01	1.28366	3.42	0.89						2.51	2	2.6	1.01						0.9	0.55	1.74	1.05						1.67	0.32	1.98	1.01						1.41	0.36	1.37	0.39
4.03	1.6	2.62	1.46						3.46	0.340367	2.02	0.86						1.9	1.82	1.5	1.74						1.79	1.35	2.36	1.22						2.52	1.72	1.69	1.5						1.22	1.34	0.98	0.74
4.63	1.14	2.97	0.86						2.47	0.605524	1.78	0.63						3	1.63	2.48	1.81						0.84	1	2.67	1.02						2.57	1.02	1.4	0.73						1.2	1.27	1.58	1.05
2.38	1.19	2.79	1.64						1.76	1.35215	3.5	1.25						2.33	0.95	2.61	0.94						1.47	0.97	2.22	0.94						2.26	1.11	2.86	0.56						1.39	0.56	1.35	1.16
3.26	0.44	1.93	0.6						2.16	0.761632	2.86	1.03						3.48	1.22	2.93	0.94						1.35	0.1	2.54	0.66						2.27	0.21	2	0.83						1.3	0.86	1.63	1.25
3.39	0.25	3.77	0.88						1.42	2.63357	1.62	0.69						2.62	1.35	2.6	1.57						1.06	0.58	3.19	1.28						4.66	0.9	1.85	0.61						1.47	0.85	1.18	0.33
3.85	0.47	1.76	1.16						3.25	0.846687	2.72	1.71						3.18	1.45	1.8	1.08						1.48	0.74	2.82	0.41						2.94	0.83	1.51	1.09						1.44	0.28	1	0.66
3.32	0.31	3.23	0.7						2.99	0.849852	2.48	1.04						2.22	0.86	2.13	1.43						2.07	1.03	1.49	0.84						3.11	0.59	1.46	1.75						1.24	1.56	1.46	0.61
4.17	1.19	1.89	0.47						2.39	1.27306	2.47	1.34						2.58	1.49	2.38	0.81						2.09	2.04	2.45	0.79						2.05	0.9	2.98	0.58						1.18	1.79	1.11	1.36
3.93	1.1	2.55	1.14						2.37	0.197442	2.79	0.57						2.75	0.8	1.55	1.1						1.36	0.2	2.78	0.72						2.13	0.27	1.9	0.56						0.77	1.21	1.7	0.69
1.42	1.18	2.81	1.34						2.02	0.99482	2.18	1.16						1.63	0.25	3.01	1.46						2.02	1.37	2.59	1.2						2.48	1.36	2.18	0.8						0.95	1.73	1.56	0.6
2.15	0.61	2.71	0.63						2.1	0.771478	2.42	0.99						2.25	0.38	1.94	1.52						1.74	1.45	2.72	0.9						2.64	0.55	2.25	1.21						1.51	0.28	1.65	0.62
3.84	0.94	2.4	1.15						1.66	0.879065	3.32	1.14						1.96	0.74	2.56	0.65						1.58	1.85	2.27	0.76						2.56	0.7	1.6	0.7						1.34	1.12	1.3	1.84
2.53	0.17	4.51	0.94						3.1	0.824076	2.09	0.78						3.18	0.38	2.32	1.54						1.34	0.25	2.71	0.88						2.04	1	1.49	0.65						1.59	0.3	1.42	0.77
3.47	1.89	1.96	1.68						2.44	0.281553	2.06	0.69						2.51	1.3	1.58	1.86						1.53	0.81	2.2	1.5						2.95	1.34	1.83	1.45						1.5	1.94	1.42	2.27
2.62	2.57	2.13	0.73						3.55	1.28764	1.6	1.12						3.92	0.12	2.46	0.95						1.59	2.3	3.19	1.02						1.64	0.12	1.89	0.89						1.2	1.09	2.3	1.16
2.4	0.2	2.04	1.3						2.17	1.00611	3.83	0.98						2.11	1.43	3.13	0.96						1.29	1.1	1.35	1.85						1.48	0.49	1.85	0.81						1.75	0.57	1.99	0.91
2.6	1.14	3.96	0.92						3.32	0.566714	5.28	0.63						1.96	1.39	2.09	0.67						1.9	1.61	1.82	0.99						2.79	0.69	1.21	0.79						0.9	1	0.99	0.54
2.03	0.32	2.49	0.42						3.23	1.54036	3.49	0.92						2.57	1.41	1.93	0.9						1.1	1.45	1.96	0.67						1.35	1.92	1.87	2.68						0.92	1.25	0.84	1.05
1.97	0.63	4.92	1.09						3.45	1.3331	3.29	1.17						1.91	1.28	1.47	0.7						1.25	2.3	3.57	0.87						1.43	1.25	1.81	0.62						0.96	1.39	1.33	1.02
2.73	0.75	3.44	1.19						2.59	0.15909	2.04	1.01						2.48	1.19	2.22	0.86						1.72	1.55	1.94	0.48						1.84	0.89	1.99	0.65						1.69	0.18	1.03	0.58
1.66	1.42	3.82	1.23						2.64	1.61149	2.49	1.22						3.15	0.71	2.88	1.07						1.56	1.68	2.1	0.94						1.47	1.59	1.65	0.73						1.32	1.59	5.18	0.49
3.83	1.61	4.08	0.88						1.93	1.80028	1.45	2.7						4.42	0.33	2.24	0.99						1.94	1.16	1.92	0.91						1.15	0.03	3.53	1.28						1.57	0.94	1.38	0.83
3.26	1.26	2.46	1.27						3.57	1.31078	1.6	1.73						1.62	0.83	2.49	0.78						1.84	1.33	3.83	0.75						2.04	1.04	2.28	2.82						1.79	0.13	1.95	0.56
2.75	1.73	3.05	1.46						2.66	0.427659	2.72	0.93						2.29	1.94	2.49	1.12						1.78	1.74	1.83	0.95						2.28	0.92	2.43	1.87						1.95	1.54	1.74	1.33
2.65	0.32	2.99	1.3						3.39	0.469849	2.93	1.33						2.85	1.66	2.64	1.44						1.99	1.24	3.05	1.54						1.36	0.06	2.64	1.08						1.3	0.91	1.3	0.9
1.74	1.58	3.96	0.96						2.65	0.207743	4.08	0.97						3.31	0.25	2.23	1.39						1.46	0.34	2.8	0.76						2.05	0.61	2.17	0.59						1.26	0.64	0.93	0.7
1.45	0.4	3.35	1.21						2.01	1.80158	2.39	0.97						2.75	1.45	2.06	1.04						2.44	1.7	1.99	0.74						0.98	1.02	2.89	1.18						1.38	0.32	0.94	0.73
2.08	0.36	2.7	0.75						2.36	1.09988	1.98	1.26						2.09	1.12	3.07	1.24						2.58	0.74	2.63	0.81						1.51	1.4	1.47	0.76						1.35	1.73	0.98	0.72
3.28	1.67	2.55	0.91						4.33	1.6908	2.37	1.02						4.36	1.14	3.46	1.16						1.62	0.89	2.06	0.98						1.74	1.62	2.4	0.63						1.9	1.24	1.14	0.54
3.31	1.35	4.37	0.87						4.42	1.02071	1.83	0.63						2.71	0.96	2.18	1.17						2.08	0.8	4.42	0.87						1.72	1.73	1.84	0.4						1.5	0.4	1.47	0.63
5.09	1.45	2.73	1.14						2.87	0.500339	2.54	1.06						3.38	1.2	2.54	1.47						1.13	1.27	2.72	0.67						1.64	0.22	1.88	0.6						1.27	0.76	1.73	1.2
2.86	0.2	2.65	0.6						3.25	0.228721	4.56	0.59						2.2	1.99	1.66	0.94						2.19	1.07	2.1	0.65						1.74	0.08	1.98	1.33						1.67	0.23	1.09	0.47
3.11	1.02	3.96	1.53						2.39	1.45493	2.14	1.39						2.6	1.66	2.26	1.49						2.59	1.37	2.88	1.18						1.59	1.05	2.6	2.01						1.17	1.31	1.22	1.54
3.26	0.5	2.53	1.23						3.31	0.254408	1.24	1.21						3.78	0.29	1.59	0.62						1.62	0.36	2.01	0.8						3.04	1.17	2.05	0.37						1.36	1.26	1.03	1.08
2	1.31	2.11	1.3						2.18	1.03689	2.79	0.8						2.16	0.53	2.64	0.86						3.54	0.51	3.13	0.62						2.58	0.88	1.86	0.37						1.44	0.93	1.48	1.03
2.56	0.77	2.04	0.67						2.11	2.01135	2.29	0.93						1.56	1.88	1.32	0.13						2.32	1.63	2.09	0.67						2.09	1.3	1.97	1.01						1.12	1.12	1.56	0.91
3.12	1.1	6.31	1.2						2.16	1.42913	2.39	0.97						1.16	1.15	2.07	0.84						1.44	0.83	1.94	1.67						2.83	0.98	2.71	2.09						1.43	0.57	1.15	1.13
2.28	1.46	3.38	1.32						4.36	0.869671	3.01	1.3						3.48	1.29	2.59	0.92						2.87	1.24	3.45	0.88						2.09	1.01	2.68	1.54						1.23	1.34	1.01	1.39
3.3	1.31	4.07	0.82						3.08	1.31867	1.77	0.79						1.23	2.8	1.9	1.86						2.34	1.59	2.05	0.98						1.66	1.2	2.44	0.53						1.39	0.41	1.04	0.66
2.46	0.9	5.17	0.99						3.5	1.10185	2.48	1.17						2.66	0.2	2.35	0.61						1.75	0.28	2.18	0.78						3.36	0.49	1.97	0.59						1.35	1.05	2.91	1.03
2.39	0.52	2.05	0.54						4.35	1.55816	2.53	1.33						2.57	0.25	2.21	0.62						1.6	0.71	1.7	1.31						2	1.07	3.52	0.84						1.24	1.69	1.32	0.67
2.49	0.37	4.21	0.71						3.91	1.20979	3.32	1.11						1.8	2.01	2.61	1.17						1.58	0.38	1.9	0.98						2.12	0.99	1.86	1.94						1.25	0.81	1.35	0.91
2.63	0.28	3.17	1.49						1.85	1.39915	3.01	0.93						2.42	1.51	1.92	0.8						2.2	1.39	1.51	1.1						1.48	0.46	2.83	0.88						1.46	1.26	1.08	0.37
4.04	1.63	4.23	0.78						1.97	1.62666	2.85	0.87						2.23	0.69	2.29	0.6						2.47	1.4	2.24	1.38						1	1.08	1.47	0.68						1.72	0.33	0.98	0.84
3.08	0.28	4.13	1						2.17	1.59551	2.33	0.74						1.79	1.3	1.59	0.93						1.08	0.94	1.53	1.05						1.57	0.32	2.83	0.74						1.61	0.99	1.02	0.91
3.02	0.56	3.35	1.52						3.24	0.495457	2.83	1.2						1.98	1.13	2.75	1.24						2.28	1.06	1.63	0.93						1.53	0.57	2.09	1.24						1.27	1.05	1.04	1.1
4.33	1.63	2.78	0.48						5.71	1.05527	1.79	0.81						2.31	1.35	2.09	1.19						1.55	0.62	2.6	0.97						2.8	0.78	2.01	0.3						1.47	2.82	1.04	0.64
3.22	0.77	4.96	0.85						3.16	0.765827	3.07	1.12						3.05	0.25	2.53	1.04						1.88	0.47	1.95	1.07						1.5	1.13	1.92	0.39						1.39	1.51	1.73	0.58
3.26	1.3	2.82	1.6						5	1.17623	2.49	0.97						2.27	0.56	2.41	0.6						3.08	0.85	1.43	0.69						3.37	1.03	2.92	0.74						1.59	0.86	1.57	1.17
2.72	0.14	5.44	1.06						4.87	1.28943	2.66	1.41						1.5	1.07	2.04	1.1						0.82	1.6	2.26	0.66						2.69	1.32	1.61	0.55						1.35	1.41	1.78	0.63
2.78	0.28	3.68	1.15						2.99	0.856039	2.86	0.97						2.59	0.37	2.15	1.22						1.4	0.23	1.39	1.03						3.14	0.28	0.98	0.54						1.08	1.68	1.73	0.71
3.72	1.18	2.61	1.12						2.71	1.93494	1.96	0.95						1.87	1.16	2.89	1.24						1.81	1.17	1.86	0.63						3.01	1.44	1.75	1.77						1.34	0.74	1.72	0.7
2.89	0.61	2.8	1.74						2.49	1.21903	2.17	0.68						1.87	1.25	2.13	1.11						1.44	0.72	2.29	1.22						2.51	1.07	1.9	0.72						1.53	0.69	0.91	0.59
2.94	0.31	2.66	0.56						4.01	0.925591	3.06	0.94						2.14	0.83	2.54	0.91						1.98	0.17	1.6	1.16						2.36	1.44	1.89	0.65						1.54	0.59	1.25	0.59
5.24	0.43	2.45	1.18						2.89	1.0826	2.85	0.73						1.86	1.81	2.06	0.64						2.15	1.63	1.67	1.57						4.64	0.8	1.67	0.78						2.14	1.03	1.33	1.07
3.79	1.19	1.78	0.76						1.86	0.76699	1.72	0.78						2.03	0.97	2.7	1.15						2.04	0.33	0.94	0.99						2.57	1.43	2.3	0.55						2.19	1.31	1.83	0.56
3.2	0.36	1.99	1.13						1.52	1.02208	2.29	0.85						2.33	0.62	2.85	0.95						2.46	1.08	2.59	1.04						1.98	1.13	1.8	0.99						1.2	1.65	1.12	1.73
3.76	1.31	3.16	1.13						2.86	1.35169	2.83	0.68						1.79	0.3	2.33	1.03						1.19	0.86	1.33	0.99						2.6	1.23	1.68	1.65						1.37	0.67	1.12	0.77
4.05	0.97	3.38	1.11						1.28	0.898456	2	0.88						0.93	0.29	2.25	1.18						1.99	1.33	2.18	0.82						3.06	0.96	2.48	0.67						1.32	0.9	0.76	1.65
2.41	0.58	2.58	1.03						2.63	0.381762	2.62	1.24						1.82	0.53	1.85	1.59						2.38	1.76	2.23	1.05						3.33	0.51	1.93	0.8						1.16	1.38	1.33	0.56
3.4	0.27	3.02	1.06						1.94	1.10977	1.93	0.82						1.12	0.76	2.71	1.37						2.02	0.46	1.27	1.73						2.32	1.16	1.54	1.06						1.26	1.15	1.48	0.89
3.02	0.37	2.92	0.74						2.52	1.80452	2.31	1.02						2.01	1.06	2.53	1.06						1.77	0.12	2.42	0.65						2.04	1.74	1.74	0.62						1.97	0.97	1.34	1.23
2.95	1.49	1.95	0.88						1.82	0.810551	3.19	0.78						1.9	1.93	2.43	1.01						1.09	1.74	1.13	0.73						3.17	0.31	1.81	0.54						1.43	0.49	1.12	0.89
4.25	1.7	1.92	1.13						2.42	0.390941	1.98	0.98						1.48	1.66	1.73	0.65						2.48	1.47	2.29	1.19						3.88	0.22	1.28	0.59						1.43	0.79	1.53	0.88
3.22	0.14	3.98	0.88						3.19	1.25559	2.77	0.83						3.17	0.2	2.01	0.66						1.73	0.15	1.62	0.7						1.7	0.07	2.09	2.39						1.9	1.02	1.01	0.76
2.11	1.14	1.45	0.99						1.51	1.79149	2.78	0.89						1.7	0.57	1.75	0.71						2.39	1.61	2.22	1.4						2.81	1.32	1.67	0.88						1.05	1.31	0.9	1.46
4.23	1.5	2.47	1.01						1.76	2.61981	2.09	1.08						2.71	0.91	2.21	0.79						1.37	0.29	2.42	0.63						2.33	1.05	1.99	1.77						1.21	0.86	1.63	1.17
2.66	0.9	2.32	0.67						3.57	1.49149	3.1	0.93						2.19	0.41	2.37	0.81						1.43	0.14	2.64	1.05						2.91	1.9	2.35	0.79						1.17	2.04	1.42	1.22
5.38	0.78	3.43	0.9						2.95	0.484994	2.81	0.97						1.58	0.15	2.54	1.3						1.79	0.37	1.66	1.67						2.81	1.29	2.36	2.21						1.26	1.43	1.72	0.43
4.3	1.05	2.63	0.9						3.82	1.42204	1.93	2.35						2.82	0.64	2.93	1.19						1.86	0.21	2.87	0.74						1.35	0.76	2.64	0.76						1.02	1.16	1.1	0.56
3.23	0.31	1.99	1.2						1.94	0.229461	4.86	0.93						1.79	0.33	2.46	0.91						2.08	0.16	2.08	0.66						2.48	1.45	5.11	0.44						0.99	1.18	1.46	0.86
3.68	1.21	1.91	0.75						2.46	0.894353	2.47	1.01						1.38	0.1	2.5	1.19						2.03	1.05	2.48	1.15						3.25	0.71	2.62	0.83						1.37	0.7	1.7	0.84
4.18	1.32	3.67	0.79						2.27	0.515751	4.27	1.23						1.87	0.75	2.36	1.47						1.23	1.23	3.81	1.05						2.69	1.1	1.52	0.65						1.55	0.29	0.86	1.2
5.05	1.54	1.83	0.44						2.57	0.842063	2.26	0.6						2.3	1.34	2.11	1.24						1.53	1.58	1.39	0.32						2.24	1.06	1.74	2.25						1.67	0.11	1.67	0.68
3.12	0.79	3.12	0.8						2.81	1.95109	2.64	1.03						1.47	1.22	1.67	0.8						2.03	1.05	2.8	0.92						2.5	1.21	1.59	1.11						1.36	1.67	1.06	0.7
2.69	0.38	2.01	1.09						2.18	0.922531	3.01	1.05						1.57	0.53	2.03	1.17						1.91	1.75	2.56	0.47						1.62	0.19	2.19	0.48						1.37	1.66	1.03	0.96
2.52	1.62	3.19	0.91						3.28	0.230349	1.94	1.22						2.63	0.48	2.57	1.26						1.84	0.61	1.59	0.66						1.6	0.51	2.31	0.86						1.42	0.09	1.92	1.32
2.32	1.54	1.8	1.34						3.19	0.54306	1.49	1.14						3.31	1.13	2.27	0.91						2.29	0.84	2.98	1.04						2.08	2.25	1.89	0.91						1.59	0.43	1.47	1.18
2.58	1.16	1.67	0.74						2.66	0.954045	3.2	0.9						2.17	0.97	1.99	1.34						1.82	0.16	2.8	0.73						3.43	1.39	2.28	0.54						1.82	0.75	1.23	0.93
2.6	0.1	3.23	0.83						3.25	1.17097	2.03	0.38						1.33	0.67	1.6	0.81						2.11	0.26	3.23	0.74						2.75	0.96	2.9	0.66						1.75	1.25	1.57	1.15
2.02	2.7	2.34	1.13						2.75	0.300275	1.82	0.89						1.29	0.33	2.06	1.13						1.72	0.18	2.02	0.78						2.33	1.09	2.34	1.58						1.74	0.2	1.27	0.49
3.35	0.37	2.47	1.26						3.31	0.680004	3.08	0.57						3.02	0.7	1.41	1.47						2.34	1.25	2.6	0.69						2.64	1.41	2.69	0.38						1.92	0.32	1.88	0.77
2.94	0.33	2.4	1.03						3.73	0.501099	4.08	0.94						3.34	1.07	1.86	1.46						1.45	1.21	2.24	0.79						2.53	0.21	2.37	0.84						1.65	0.53	1.88	1.15
3.25	0.62	2.61	1.43						3.63	0.279145	2.86	0.88						2.31	1.58	1.56	1.13						1.34	0.94	2.45	0.95						2.15	1.37	1.86	2.17						1.23	1	0.98	0.55
2.91	0.35	2.69	1.32						2.07	1.24452	2.19	1.21						4.5	1.12	2.4	0.55						2.25	1.49	2.46	1.26						2.64	0.63	1.53	1.16						1.69	0.65	1.05	0.63
3.11	0.61	2.9	1.09						2.59	0.705489	2.64	0.94						3.23	0.79	1.88	0.73						1.63	1.82	2.54	0.86						1.68	1.51	1.61	0.86						1.91	0.76	1.67	0.5
3.83	0.23	2.9	0.95						4.31	1.58554	2.55	1.18						1.78	0.55	2.08	0.74						1.67	1.21	2.46	0.89						1.73	1.27	3.51	1.02						1.25	0.76	1.61	0.56
2.48	0.4	1.45	2.28						2.32	1.90318	3.21	0.83						2.83	1.37	2.15	0.61						0.97	0.83	2.08	0.8						2.13	1.83	2.59	0.93						1.11	0.64	1.23	1.58
4.31	1.15	2.34	0.73						2.41	1.38471	3.51	0.82						3.05	1.09	1.76	0.71						1.74	1.26	2.61	1.39						2.49	1.18	1.6	1.33						1.47	0.92	1.08	0.74
2.81	0.27	2.5	1.03						4.47	1.38593	3.52	0.79						3.06	1.62	2.67	1.86						2.36	1.3	6.46	0.77						2.36	0.64	1.49	0.79						1.83	1.38	1.48	0.55
2.55	0.35	2.5	1.2						2.44	0.883082	2.01	1.1						1.94	1.42	1.82	1.29						3.04	0.13	2.57	0.7						2.55	1.87	1.4	0.81						1.17	0.87	1.45	0.52
3.95	1.91	3.82	0.81						3	0.379468	2.3	1.07						2.18	1.04	1.74	1.09						1.62	1.09	2.56	1.22						2.13	1.2	2.45	0.55						4.09	0.88	1.55	1.47
2.59	0.53	2.64	1.37						3.03	0.152986	2.25	1.04						3.03	0.39	2.18	0.83						1.51	1.15	1.69	1.31						1.57	0.89	1.44	0.84						1.65	0.1	1.03	0.48
2.58	0.51	2.93	0.81						3.3	0.385258	2.49	1.28						1.85	0.35	1.84	1.34						1.06	1.49	2.86	0.81						1.22	0.73	2.35	0.5						1.3	0.56	1.39	0.78
2.98	0.27	4.6	0.7						2.95	0.820933	3.4	0.68						1.92	1.53	2.26	1.12						2.23	1.29	1.97	1.41						1.62	0.31	1.51	0.95						1.86	0.54	1.37	1.06
3.82	1.28	4.42	1.24						3.83	1.65462	1.96	0.98						1.78	1.45	1.86	0.74						1.65	1.68	2.46	1.21						2.26	1.53	2.51	1.49						1.87	0.2	1.48	0.98
3.48	0.32	3.46	0.82						3.63	0.729001	2.81	1.32						2.46	0.82	2.41	1.1						2.12	1.62	2.4	1.28						2.47	1.55	1.89	1.84						1.72	0.56	1.07	1.22
2.4	0.52	2.24	1.11						2.35	0.970701	2.72	1.23						2.05	1.28	2.07	0.85						1.68	0.88	2.97	1.25						3.31	0.13	2.41	0.45						1.09	1.22	1.16	0.8
3.2	0.55	2.99	1.21						3.32	0.652551	2.82	1.61						2.51	0.48	1.52	1.33						2.46	1.9	1.59	0.74						1.27	1.86	2.03	0.56						1.64	0.72	1.62	0.64
3.19	0.29	2.58	1.18						2.13	0.793885	2.47	1.15						1.5	0.91	1.48	0.4						1.23	0.48	2.39	0.76						2.83	0.9	1.87	0.65						1.55	0.87	1.56	0.94
2.68	0.7	3.62	1.34						2.49	1.23627	2.45	0.69						1.11	0.18	3.04	1.34						4.16	1.39	3.07	1.17						2.4	0.54	1.86	0.69						1.42	0.51	1.29	1.06
2.19	0.4	3.39	1.06						2.05	2.52594	3.56	0.92						0.92	0.21	1.6	1.14						2.15	2.29	1.71	1.06						2.29	1.75	1.16	0.57						1.64	1.08	1.34	1.24
2.3	0.48	3.91	1.04						2.99	0.482096	3.07	0.92						2.91	0.95	1.43	0.92						2.11	0.2	3.64	1.26						2.25	1.64	2.25	0.49						1.92	0.12	1.39	0.99
2.1	0.8	3.57	0.85						3.29	0.29514	2.28	0.96						1.63	0.85	2.3	0.92						0.94	1.68	3.46	0.7						2.2	0.94	1.9	0.42						1.48	1.4	0.76	1.33
2.32	1.82	2.98	0.77						2.02	1.60925	3.3	0.78						1.66	0.33	1.8	0.95						0.93	1.23	2.43	0.61						2.26	0.83	2.43	0.97						1.59	0.51	1.2	0.63
1.88	0.9	3.63	0.86						4.62	1.1064	1.73	0.86						1.94	3.03	2.47	1.29						1.32	2.94	2.01	0.46						2.7	0.93	2.44	0.63						1.61	0.22	1.48	0.94
2.47	0.6	4.13	1						2.74	1.30258	3.11	0.76						2.93	1.76	2.13	1.02						1.56	1.05	2.02	1.03						1.88	1.6	1.7	0.87						1.2	1.12	0.83	1.08
4.08	0.84	3.88	1.03						3.36	0.254175	2.34	0.83						2.76	0.2	3.17	0.81						1.81	1.54	2.91	0.74						2.66	0.99	1.73	1.04						1.94	1.15	1.81	0.67
2.4	0.4	2.74	0.94						4.82	1.14511	2.25	0.9						1.82	1.71	2.23	0.92						1.31	0.52	1.76	1.26						2.95	0.37	2.92	0.88						2.2	1.41	1.94	0.82
2.11	0.67	2.54	0.66						2.36	1.84658	2.44	1.08						1.73	1.6	1.48	2.13						1.49	2.51	1.4	1.31						2.55	1.1	2.92	1.66						1.18	0.83	1.09	0.64
3.32	1.03	2.01	1.24						3.13	0.505067	2.82	0.79						1.78	1.54	2.87	0.83						2.24	1.16	2.26	1.3						1.59	0.1	1.93	0.79						1.45	0.7	1.38	0.54
2.42	0.26	4.04	0.72						2.48	1.32414	4.1	0.72						1.97	1.62	1.65	1.37						1.28	0.81	1.69	1.05						2.61	1.71	1.68	0.93						1.84	0.5	1.54	0.92
3.43	1.22	3.19	0.87						3.46	0.215043	3.07	0.98						1.63	1.06	1.61	1.09						1.56	0.39	2.39	1.01						1.84	0.87	2.3	0.93						1.1	0.9	1.23	1.23
3.47	1.77	2.74	1.41						2.72	1.97136	2.45	1.74						3.25	0.26	1.65	1.26						2.37	0.78	1.82	0.68						3.03	0.72	2.36	0.88						1.89	0.18	1.25	1.41
2.55	0.59	4.26	0.94						4.15	1.06274	2.79	1.32						2.13	2.1	1.73	1.18						1.85	0.99	0.99	0.96						2.03	1.24	1.75	0.81						1.56	1.02	1.3	0.73
3.49	1.53	3.53	1.18						2.89	0.196569	3.96	1.09						2.99	0.26	2.08	1.03						2.41	0.79	1.39	1						2.29	1.18	2.03	0.98						1.59	0.06	1.09	0.98
4.91	0.72	2.56	0.77						2.83	0.403189	2.02	0.99						2.5	0.33	1.39	0.38						2.46	0.46	1.02	0.85						1.47	0.7	2.43	0.73						1.28	2.22	1.09	1.21
2.73	0.81	4.57	0.85						2.46	0.556435	1.26	0.94						2.92	0.86	1.81	0.66						1.06	1.51	1.72	0.93						2.66	1.07	1.96	0.48						1.28	1.06	1.23	1.37
2.65	0.63	3.45	0.78						3.06	0.99265	2.74	0.8						2.38	1.62	3.94	0.78						2.56	1.07	1.85	1.02						1.94	1.51	1.63	1.45						1.58	1.11	1.29	0.53
1.92	1.34	4.67	0.77						2.92	1.13845	3.53	1.34						2.33	1.73	1.48	0.53						1.45	0.17	1.85	0.52						1.84	0.05	2.15	0.71						1.6	1.35	1.41	0.66
3.08	0.62	5.13	0.91						2.04	1.16975	3.07	1.07						2.76	1.84	1.92	1.14						2.06	2.1	2.21	0.35						2.79	1.01	2.2	1.06						1.14	1.21	1.94	0.64
2.26	1.23	2.84	0.69						3.75	0.376783	2.46	0.95						2.68	0.5	2.56	1.41						3.05	0.85	2.66	0.7						2.5	1.45	2.35	0.68						1.71	0.21	1.08	0.82
3.01	1.5	3.98	1.02						1.38	1.37894	3.53	0.62						1.51	0.97	2.31	0.91						2.15	1.26	4.46	1.05						2.31	1.3	2.76	0.68						1.23	1.44	1.13	0.76
1.68	1.78	2.47	2.18						3.35	1.63051	2.39	1.03						2.09	0.77	2.17	1.34						1.82	1.1	1.6	1.44						3.49	0.36	1.45	1.38						1.18	1.21	1.19	0.49
2.49	0.73	2.15	1.73						2.23	0.909535	1.44	1.09						3.87	0.28	1.3	0.4						1.45	1.19	1.84	1.03						1.61	0.77	2.25	0.51						1.61	0.96	0.96	0.95
2.39	0.42	4.87	0.79						2.17	0.613263	2.92	0.84						1.92	0.88	2.58	1.08						2.99	0.86	1.51	0.87						2.34	1.19	1.64	1.67						1.35	0.72	0.93	1.28
2.33	1.65	3.26	1.06						2.47	0.294791	2.74	1.09						2.04	0.59	1.75	1.41						2.21	1.19	2.13	0.84						2.1	1.21	2.63	0.71						1.42	0.73	1.21	0.94
2.92	0.43	3.14	0.89						1.74	0.457978	2.52	1.08						2.8	0.91	1.83	0.63						2.03	0.76	1.84	1.18						2.89	0.99	2.76	1.86						1.22	0.83	1.06	1.07
3.02	1.15	4.26	0.64						3.11	1.04204	2.13	1.02						2.48	1.82	2.62	0.74						1.53	0.28	2.33	1.22						1.67	0.46	1.94	0.77						1.6	0.68	1.31	1.3
3.07	1.04	2.13	0.36						2.43	0.785769	2.29	0.96						2.86	1.25	2.63	1.34						2.32	1.07	2.37	1.04						3.42	0.95	1.71	2.35						1.06	0.45	0.95	0.98
3.94	1.33	2.76	1.72						1.93	1.77458	2.44	1.1						1.79	2.05	2.54	0.79						2	1.95	2.57	0.3						1.4	0.67	1.86	1.5						1.5	1.15	1	1.01
3.46	1.44	2.23	0.39						3.22	0.977953	2.94	1.17						2.62	0.98	3.69	0.37						1.72	0.37	3.98	1.15						2.39	0.86	1.41	1.2						1.24	0.64	1.01	0.45
2.8	0.62	2.14	1.72						1.57	1.93176	2.8	1.01						2.25	1.32	2.51	0.78						1.54	0.16	1.21	0.87						1.52	0.13	2.71	0.71						1.7	0.56	1.58	0.64
2.69	0.34	1.83	1						1.62	1.50929	2.01	1.1						2.12	1.02	1.72	1.02						2.23	1.02	2.35	0.67						2.22	0.2	1.78	1.38						1.17	1.06	1.2	0.47
3.81	0.65	3.47	0.99						4.05	2.16136	1.89	0.41						1.94	1.26	2.2	1.09						2.18	1.49	1.55	0.76						3.62	2.3	2.26	0.85						1.27	0.5	2.84	0.73
2.34	1.46	1.92	0.79						3.8	1.45477	3.18	0.85						1.52	0.4	3.21	1.1						1.68	0.28	2.59	1.27						1.5	1.35	2.45	0.59						1.48	0.11	1.23	1.47
3.93	0.24	4.35	0.78						2.43	1.22306	2.44	0.8						2.11	0.87	2.36	0.76						1.39	0.4	1.91	0.61						1.98	0.43	2.55	0.44						0.95	0.76	1.81	1.89
3.57	0.67	4.25	1.11						2.29	1.9438	3.43	1.1						2.71	1.36	1.68	0.67						1.49	0.23	2.22	0.82						1.94	0.17	2.91	1.13						0.8	0.19	1.49	0.57
2.53	1.74	2.97	1.18						2.71	0.445052	3.22	1.3						2.57	1.51	2.23	1.22						2.72	0.64	2.15	0.76						2.62	1.3	2.54	0.9						1.47	0.8	1.51	0.99
1.94	2.12	4.26	0.66						1.66	0.974676	2.92	1.38						2.8	0.86	1.9	0.63						1.62	0.22	2.72	0.86						2.59	1.51	1.94	0.35						1.15	1.12	1.24	1.31
2.57	0.44	2.61	1.66						2.96	0.278475	1.71	0.48						2.21	1.23	2.94	0.78						1.35	0.14	1.83	0.41						2.95	0.72	1.96	0.36						1.11	0.73	1.26	0.92
2.28	1.15	2.66	1.2						2.35	0.905055	2.64	1.33						1.77	1.01	1.75	0.98						1.2	1.12	1.96	0.73						1.8	0.4	2.04	0.86						0.95	0.36	1.91	0.54
3.65	1.87	2.38	0.82						4.24	1.5911	2.05	0.77						2.13	1.63	2.23	0.52						1.69	0.22	1.66	0.63						3.4	1.12	2.02	0.81						1.1	1.62	1.18	1.58
2.19	1.58	2.29	1.04						2.48	0.903028	2.39	1.18						2.22	1.43	2.3	0.92						1.57	0.14	1.43	1.04						2.18	1.48	2.38	0.71						1.86	1.01	1.62	0.87
4.31	1.18	2.4	1.39						2.13	0.877436	1.83	0.77						3.22	0.64	2.77	1.57						1.73	1.13	3.21	1.26						3.07	0.84	2.13	1.03						1.34	1.81	1.2	1.24
2.54	2.07	2.07	0.81						2.54	0.910563	2.8	0.9						2.68	1.53	2.32	1.42						2.92	1.26	1.85	0.65						1.76	0.25	1.03	0.9						1.91	1.25	1.7	0.65
2.75	0.31	1.6	0.68						2.76	1.30211	1.77	0.75						3.33	1.39	3.21	0.82						2.41	1.1	1.74	1.15						2.39	1.02	2.38	0.62						2.17	0.83	1.47	0.48
2.1	0.99	5.27	0.83						2.19	0.974102	3.68	0.76						2.89	0.7	2.35	0.78						1.78	0.16	1.9	0.78						1.32	0.48	2.31	0.81						1.23	2.56	1.53	0.75
3.22	0.33	3.82	0.86						3	0.207038	4.34	0.97						3.16	1.04	2.22	0.8						2.75	0.89	1.86	1.11						1.19	1.38	1.98	0.55						1.56	1.31	1.19	0.7
2.79	0.49	1.53	0.83						2.79	0.159463	2.7	0.83						2.91	1.17	2.12	0.81						1.25	0.97	2.41	0.74						1.04	0.25	1.6	1.42						1.18	1.88	0.93	0.6
2.79	0.37	2.72	0.95						2.83	1.45992	3.28	1.06						3.69	0.16	1.54	1.37						1.69	1.5	1.81	0.88						2.15	1.01	2.28	0.71						0.93	1.87	2.05	0.71
4.07	0.65	1.68	0.64						4.08	0.840938	3.69	0.8						1.28	0.62	1.45	0.55						2.17	2.13	3.34	1.36						1.88	0.96	1.06	1.65						1.85	1.1	1.2	0.71
3.21	0.26	2.42	1.38						3.22	0.30924	2.14	1						2.99	0.56	3.63	1.27						2.72	1.33	2.69	0.87						1.3	0.24	2.92	2.28						1.48	1.92	1.61	1.58
4.04	1.6	2.33	1.15						3.69	0.686655	2.12	1.23						3.59	0.29	2.09	1.3						2.36	1.3	3.57	0.9						1.43	1.22	1.56	1.92						1.08	2.3	1.78	1.25
2.22	1.5	3.73	0.82						3.1	0.399564	2.39	0.87						1.79	0.57	1.42	0.32						1.33	1.13	2.53	0.55						2.1	1.21	1.94	0.7						1.58	0.78	1.15	1.53
2.41	1.43	3.04	1.01						2.73	0.453073	2.88	1.48						2.05	1.36	3.44	0.81						1.56	1.33	2.18	0.95						1.78	0.53	2.45	0.51						1.25	1.23	1.17	1.21
4.02	1.13	2.16	0.67						2.33	1.5228	3.37	1.27						0.94	0.15	1.89	0.8						2.71	1.07	2.67	1.37						1.29	0.24	1.65	0.35						1.6	0.26	1.36	0.98
3.51	1.09	2.84	0.96						2.46	1.26231	2.99	0.76						1.68	1.31	1.4	0.97						1.17	1.38	1.66	1.01						3.19	0.33	2.74	0.86						1.63	0.8	0.91	0.79
3.04	0.8	2.67	0.9						3.9	1.40798	1.92	1.27						1.99	1.09	1.94	0.85						2.54	1.41	1.8	0.92						1.5	0.72	2.07	0.44						1.49	0.76	1.18	0.5
2.02	1.92	3.18	1.11						2.97	0.80614	7.4	0.8						1.8	1.77	2.16	0.94						1.95	0.29	2.45	0.79						1.35	1.03	1.56	1.4						1.14	1.31	1.1	0.99
2.56	0.26	3.37	1.1						1.81	0.54405	2.4	1.08						2.76	0.2	0.59	0.06						3.26	0.53	3.25	1.14						2.84	1.2	2.84	0.76						1.27	1.71	1.97	1.16
5.44	0.64	2.58	1.55						2.37	1.15307	3.31	1.16						2.26	1.05	2.09	1						1.93	0.46	1.71	0.78						2.66	1.89	1.79	1.05						2.16	1.15	1.77	0.85
3.18	1.37	2.37	0.64						4.34	1.27102	2.6	0.85						1.54	0.83	2.34	0.75						2.36	1.28	2.07	0.93						2.99	0.52	1.97	1.14						1.29	0.64	1.62	1.11
4.75	1.17	3.47	2						2.1	1.12293	2.17	1.04						1.66	1.33	2.58	1.23						2.29	1.21	1.93	1.04						1.45	0.18	1.51	0.54						4.77	0.2	1.25	0.88
3.01	0.67	2.6	0.67						2.62	1.5281	3.04	1.01						2.49	0.67	1.56	1.13						3.08	0.81	2.22	1						3.03	1.7	1.96	0.74						1.07	0.69	1.33	1.91
3.88	0.86	2.52	0.83						5.26	0.193848	3.31	0.82						1.6	1.46	1.86	1.03						1.93	0.77	2.04	0.83						2.38	0.87	1.64	0.83						1.98	0.89	1.16	0.43
2.98	0.56	4.23	0.83						3.61	0.156939	3.68	1.27						2.29	1.07	1.55	1.09						1.69	0.74	3.83	0.76						2.52	1.51	2.6	1.44						2.11	1.31	1.1	0.38
3.79	1.84	3.98	0.84						2.82	0.868313	2.65	1.09						1.91	1.95	1.57	1.48						2.92	1.67	1.71	1.24						2.79	1.23	1.8	1.68						2.16	0.17	2.07	0.78
4.42	1.64	1.9	1.25						3.41	0.701227	2.49	0.57						1.21	1.65	2.99	0.82						1.57	0.96	2.02	0.84						2.71	0.74	2.77	1.04						1.9	1.12	1.68	0.62
2.75	0.45	4.03	0.9						1.72	0.58127	7.06	0.7						2.45	1.54	2.37	1.17						1.03	0.75	1.52	0.78						1.94	0.58	1.75	0.91						1.75	0.93	1	1.17
2.63	0.46	2.57	2.08						1.75	1.19534	3.11	0.85						1.77	2.08	2.26	1.09						1.65	0.17	1.95	1.02						1.72	0.98	1.97	0.91						1.72	0.21	0.86	0.93
2.4	1.19	2.06	0.78						1.62	1.32485	2.41	1.08						1.81	2.28	2.26	0.71						2.23	1.85	1.4	0.7						2.31	1.73	2.28	0.88						1.59	0.29	2.13	1.24
4.47	1.11	1.99	1.02						1.65	1.70721	2.6	0.63						2.64	1.11	1.76	0.66						1.64	2.37	1.46	0.71						2.06	1.71	1.65	0.42						1.3	1.11	1.18	1.19
2.29	1.62	2.68	0.82						2.81	1.10357	2.19	1.25						1.5	1.01	2.88	1.16						1.7	1.16	1.77	0.58						1.83	1.23	3.06	0.81						1	1.72	1.46	0.67
3.17	0.45	1.82	0.97						2.29	0.551949	2.28	1.25						1.25	0.27	2.25	0.74						0.96	1.58	1.23	1.05						2.71	0.89	2.21	0.64						1.68	0.37	1.07	0.99
2.31	0.64	3.11	1.09						2.09	0.5655	2.14	1.47						1.33	0.39	1.67	1.09						2.31	1.08	1.51	1.11						2.46	1.06	1.49	2.33						1.26	1.55	1.63	0.82
3.27	0.37	5.07	0.8						2.86	0.439961	3.01	0.76						2.55	0.57	1.89	1.28						1.26	0.38	1.59	0.75						3.19	0.53	1.94	1.21						1.35	1.5	1.36	0.83
3.05	0.56	2.44	0.55						1.67	0.983456	3.44	0.71						1.51	0.31	1.72	1.1						2.32	1.36	1.26	1.19						4.08	0.13	2.02	0.82						1.39	1.22	1.81	0.52
3.53	1.19	3.14	1.07						2.06	2.01088	1.92	0.7						2.49	0.17	1.72	1.27						1.92	2.21	4.07	1.01						2.4	0.94	3.34	0.71						1.4	0.62	1.09	1.22
2.85	1.08	1.84	0.63						2.03	1.51583	2.69	1.24						3.11	0.18	1.97	0.64						1.48	1.03	1.31	1.79						1.51	0.85	2.61	0.81						1.91	1.18	0.85	0.44
3.22	0.44	2.27	1.05						1.76	1.24518	2.43	0.88						2.45	0.37	1.49	1.12						1.55	0.58	1.81	0.68						1.92	0.98	1.37	1.33						0.94	0.81	1.85	0.79
3.56	1.72	3.83	0.86						3.58	1.15981	2.44	0.61						1.98	1.06	2.52	0.84						1.42	1.67	2.18	0.73						2.28	2.97	2.39	0.56						1.86	1.06	1.48	0.72
3.12	0.36	2.48	0.86						3.36	0.744271	2.74	0.69						1.48	0.89	1.93	1.09						1.39	0.79	1.88	1.28						2.2	1.39	2.29	0.72						2.09	0.93	1.39	1.17
3.62	1.37	2.66	0.98						3.21	0.220272	2.83	0.94						1.69	0.14	1.67	1.34						1.34	0.24	1.83	0.95						2.42	1.92	1.99	0.44						1.69	0.71	0.97	0.52
2.65	0.79	1.95	0.66						2.51	0.680007	3.32	1.29						1.76	1.34	1.64	0.89						1.19	0.23	1.8	0.76						3.76	0.2	2.8	1.14						1.82	1.53	1.35	1.39
2.02	1.43	3.96	0.87						2.93	0.201681	1.89	0.91						1.55	0.32	1.82	1.32						1.1	0.97	2.01	1.26						2.17	1.31	1.82	0.83						1.41	0.79	1.33	0.96
2.08	0.33	1.88	0.66						2.38	0.671821	2.31	2.14						1.76	1.17	2.85	1.17						1.84	0.92	2.28	1.08						2.17	0.96	1.87	0.66						1.74	0.45	0.93	1.37
2.14	1.3	2.77	1.73						2.63	1.57887	2.62	1.08						1.29	0.63	2.88	1.14						1.84	1.74	1.32	1.23						1.9	0.09	2.07	1.25						1	1.42	1.79	0.85
3.04	1.4	3.11	0.85						2.72	0.747252	2.47	0.9						2.17	0.91	2.69	1.15						2.21	1.07	3.01	0.7						2.9	0.78	2.08	1.28						1.26	1.02	1.4	0.82
1.79	0.5	4.6	0.78						2.83	0.532277	2.16	1.02						2.99	0.47	2.64	0.95						1.86	1.4	2.18	0.94						4.27	0.31	2.65	0.85						1.05	1.1	1.85	1.05
2.89	1.6	4.57	0.69						2.81	0.757054	3.31	1.32						2.44	1.28	2.37	0.73						1.04	1.15	1.54	0.66						2.18	0.85	2.11	0.87						1.36	1.15	1.4	2.94
2.26	0.99	3.03	1.08						2.89	0.201824	1.93	0.95						2.31	1.34	2.11	1.05						1.21	0.57	2.31	1.16						2.94	1.26	1.33	1.04						1.66	1.01	1.32	0.24
1.92	0.44	3.21	1.54						2.64	0.669446	3.3	0.79						2.21	1.67	1.11	1.05						0.91	0.83	1.66	0.94						1.55	1.04	2.83	1.29						1.66	1.31	1.32	0.62
2.2	0.45	2.9	1.02						2.35	0.833039	1.71	0.74						3.39	1.23	2.09	0.96						2.05	1.14	2.27	0.7						0.93	0.49	2.91	1.22						1.08	1.11	1.26	2.82
2.58	0.57	4.45	0.84						2.49	1.20508	2.06	0.52						3.12	1.32	2.17	1.99						1.65	1.82	1.63	1.79						2.19	1.1	1.9	0.65						1.36	1.23	1.35	0.58
3.41	1.41	3.03	1.09						3.67	0.648632	3.76	0.99						1.79	0.3	2.34	1.19						2.5	0.91	2.56	0.99						1.54	1.36	1.53	0.7						1.78	0.43	1.81	0.99
2.93	1.02	4	1.41						3.53	0.573432	2.28	1.33						2.05	1.52	2	0.82						4.25	0.99	2.82	1.13						1.68	1.17	1.58	0.53						1.42	0.76	1.5	1.26
2.59	1.18	4.56	1.01						3.54	0.524696	3.25	0.71						2.81	0.99	2.43	0.79						3.97	1.1	1.86	0.74						1.67	1.48	1.29	3.75						1.86	0.2	1.35	0.59
4.78	1.57	3.49	1.37						3.95	1.12254	2.38	1.09						2.36	1.96	2.09	0.77						1.78	0.35	1.72	1.05						1.94	0.91	1.68	0.59						1.18	1.38	1.5	0.6
3.36	1.23	2.94	0.96						3.89	1.45983	2.31	1.13						1.82	1.19	2.72	1.41						1.34	1.12	2.44	1.37						1.32	0.41	1.55	0.58						1.42	1.24	1.11	0.85
3.06	0.31	2.92	1.22						4.46	1.19043	1.87	0.59						3.11	0.64	2.23	1.06						1.28	1.54	2.05	1.48						1.67	2.26	2.98	0.59						1.28	1.37	1.23	1.47
3.04	0.22	3.21	1.31						3.34	0.403745	2.34	1.23						3.23	0.35	1.85	0.67						1.43	0.51	2.24	0.71						1.9	1	2.18	0.96						1.29	0.98	1.74	1.1
1.53	1.41	2.7	1.2						2.92	0.504401	1.88	1.37						2.36	2.11	2.61	1.2						1.34	0.27	3.02	0.9						3.17	0.13	2.51	0.92						1.68	0.53	1.1	1.28
2.36	0.88	2.83	0.76						5.75	1.22408	3.07	0.98						2.1	1.35	2.26	0.96						1.44	0.15	1.7	1.06						2.32	0.84	1.69	0.47						1.42	0.79	1.25	1.38
2.71	0.67	5.08	0.92						2.62	0.694408	2.27	0.64						2.44	1.46	1.97	1.1						1.69	0.33	3.25	0.92						2.08	1.46	1.98	1.13						1.53	0.34	1.8	0.56
3.61	1.29	3.45	1.22						2.48	0.917973	1.92	0.89						2.21	1.21	2.11	0.66						1.79	0.72	1.81	0.7						1.76	0.82	1.99	0.81						1.36	1.41	1.21	0.96
2.28	2.03	4.21	1.12						4.16	0.610468	3.28	1.97						1.8	0.62	2.82	1						2.54	0.61	5.19	1.34						2.01	1.99	2.32	1.56						1.18	0.73	1.12	1.27
2.08	1.55	2.54	0.98						2.36	0.657025	2.51	0.98						3.35	1	1.72	0.44						1.85	0.22	2.06	1.22						0.97	2.55	1.42	0.44						1.44	2.12	1.37	1.17
1.87	1.53	2.41	0.82						2.85	3.29032	2.15	0.74						2.14	1.39	2.59	1.1						1.22	0.8	2.42	1.39						1.65	1.58	1.18	0.94						1.5	0.98	1.3	0.73
2.25	0.75	3.44	1.2						2.37	2.03674	2.72	0.52						3.14	1.46	2.3	0.85						1.39	0.4	1.89	0.81						2.28	0.94	2.91	1.13						1.38	1.56	1.26	0.69
4.36	0.73	3.46	1.17						1.76	1.94918	2.97	0.94						2.75	0.45	2.05	1.27						2.07	1	2.85	0.61						1.38	1.29	2.11	1.9						1.11	1.38	1.15	1.48
1.81	0.76	3.27	1						3.89	1.79162	1.96	2.43						2.97	0.6	1.18	0.62						1.88	1.55	2.91	1.21						2.65	1.03	1.6	0.5						1.79	0.4	0.98	1.07
2.51	0.5	3.11	1.48						2.28	2.22198	4.47	1.2						2.99	0.5	1.72	0.92						1.72	1.05	3.43	1.15						1.97	1.19	1.25	1.4						1.5	1.33	1.78	0.95
2.46	0.34	4.6	0.81						4.89	1.70315	3.3	1.02						2.51	1.08	1.47	0.73						2.49	1.27	1.81	1.22						1.33	0.87	1.48	1.57						1.28	0.72	1.76	1.06
2.9	0.26	2.62	1.18						1.77	2.56707	2.01	0.8						2.36	1.3	1.7	0.93						2.27	1.13	2.86	1.7						3.06	1.1	2.13	0.57						1.44	0.78	1.13	1.7
2.33	0.33	2.5	0.95						2.77	1.68124	2.23	0.97						1.98	0.12	2.08	1.34						1.79	0.2	2.12	0.67						1.58	0.14	2.67	0.78						1.24	0.94	1.07	1.51
3.44	1.12	3.41	0.96						2.13	1.20191	2.28	0.83						2.93	0.53	1.26	1.22						3.03	1.13	2.4	1.39						1.21	1.24	2.53	0.59						1.18	1.14	1.32	1
2.03	1.87	3.28	0.66						2.37	0.808446	2.55	1.02						3.46	0.31	2.22	1.23						1.62	0.18	1.58	1.2						3.39	0.55	2.34	1.64						1.23	0.96	0.74	0.79
2.35	1.17	3.47	0.78						4	1.31417	1.92	0.87						3.22	0.72	2.1	1.18						1.46	0.5	1.35	0.86						1.83	0.51	2.5	0.67						1.78	0.37	1.98	0.87
2.62	1.15	2.28	1.15						3.82	1.42912	1.9	1.49						3.19	1	1.92	0.58						2.43	2.06	2.37	0.99						2.37	1.26	1.71	1.08						1.66	0.71	1.06	0.81
3.35	0.51	4.73	1.42						3.53	0.121475	2.23	0.79						2.22	1.33	1.45	1.09						2.11	0.34	3.08	0.71						1.44	0.21	1.49	0.89						1.33	0.98	1.68	0.73
2.32	1.69	4.72	1.08						3.47	0.194252	2.62	1.37						2.27	0.69	1.51	1.04						1.69	0.92	1.87	0.93						2.22	1.57	2.61	0.38						1.48	1.88	1.49	0.54
2.26	0.84	2.45	1.03						3.3	0.213137	3.33	0.95						2.31	0.8	1.86	1.05						1.78	0.22	1.86	0.93						1.71	1.14	1.67	0.87						1.4	1.76	1.08	1.06
4.98	1.48	4.11	1.02						4.54	1.21413	1.92	0.72						2.5	1.56	1.92	0.88						2.12	2.45	2.27	0.64						1.34	0.62	2.33	1.66						1	1.14	1.98	0.88
3.94	1.95	2.6	0.77						2.3	0.592671	4.24	1.12						2.12	0.23	1.42	0.6						1.83	0.11	1.7	0.82						1.78	1.46	2.61	0.81						1.18	1.01	1.73	0.63
3.85	1.48	3.44	0.71						2.75	0.445676	1.65	0.98						3.72	0.59	2.45	0.93						2.16	1.37	1.56	1.18						1.99	0.18	1.6	0.35						1.08	1.68	1.37	1.81
2.96	0.26	2.36	0.57						1.73	0.750111	1.71	1.25						2.15	0.53	1.8	1.1						1.82	1.24	2.31	0.41						3.02	0.66	1.18	1.91						1.05	1.23	2.61	0.94
2.22	1.06	3.15	1.34						2.54	0.362673	3.16	1.15						1.85	1.88	2.05	1.33						2.3	1.5	3.8	0.92						1.74	0.16	2.24	0.67						1.34	1.38	2.83	0.85
3.03	0.83	2.85	0.84						1.4	1.80018	1.94	0.89						1.89	1.57	2.16	1.33						2.8	0.87	2.16	0.41						2.88	1.7	1.52	0.54						1.27	0.83	1.09	0.95
3.12	0.27	2.29	0.76						1.66	1.60191	3.7	0.88						1.81	1.59	2.1	0.69						2.23	1.18	1.52	0.58						2.53	0.78	2.32	0.71						1.39	0.62	1.59	1.2
2.42	1.37	1.86	0.41						2.13	1.70839	2.69	0.87						2.34	0.59	1.56	0.75						2.09	1.54	2.5	0.88						1.8	1.13	2.72	1.05						2.02	1.6	2.08	0.95
2.51	0.39	2.95	0.44						2.58	0.257225	3.19	1.03						1.39	1.55	2.07	0.78						2.41	0.86	1.77	0.43						2.1	0.85	1.72	0.58						1.38	1.17	2.44	1.11
3.59	1.06	2.5	1.68						2.56	0.252381	3.3	0.71						1.93	1.14	1.93	0.66						1.61	1.02	2.05	1.28						1.89	1.51	1.43	0.96						1.38	0.84	1.18	0.81
3.11	0.28	2.4	0.88						2.51	1.38768	3.2	1.23						1.9	1.47	2.25	0.75						1.99	1.42	2.68	0.81						2.06	0.83	1.58	1.11						1.59	0.48	1.24	0.64
3.42	0.47	2.95	1						1.97	1.62333	2.02	0.99						1.81	1.48	1.73	1.32						2.53	0.86	2.75	0.77						1.98	0.92	2	0.77						1.35	1.15	1.33	0.55
3.29	1.33	2.87	0.64						3.63	1.5455	3.09	1.09						2.3	0.76	2.24	0.98						1.91	0.31	2.9	0.83						2	1.1	1.11	0.66						1.01	0.73	1.04	0.6
3.84	1.59	2.16	0.92						1.99	2.69756	2.42	0.75						1.23	1.75	2.26	1.21						2.36	1.28	2.08	0.75						2.32	1.37	2.33	1.45						2.35	1.69	1.04	1.77
2.72	0.44	2.63	0.65						2.26	3.61883	3.15	1.11						1.94	0.98	3.48	0.71						1.68	0.68	1.69	1.19						1.69	0.64	2.44	0.5						1.76	1.47	0.8	1.04
3.67	0.9	1.19	1.27						2.95	1.29582	2.26	1.13						2.76	0.34	2.12	0.77						1.27	1.54	2.47	1.25						1.78	0.25	1.7	0.67						1.02	1.57	1.41	0.7
2.88	1.87	2.97	0.7						3.32	1.88962	4.09	0.85						2.18	0.56	2.14	0.98						1.64	0.17	1.69	1.24						2.92	1.72	2.73	2.49						1.52	0.11	1.64	0.85
2.1	1.7	2.37	1.36						2.94	0.2173	3.06	0.62						1.53	1.7	1.65	1.18						2.48	1.16	2.14	0.88						2.27	0.25	2.63	0.94						1.29	1.35	1.99	0.72
2.48	0.47	3.56	0.7						2.25	1.26832	2.49	0.88						1.93	1.7	1.26	0.95						1.35	1.38	1.87	1.11						1.78	0.18	2.14	0.5						1.09	2.43	1.29	1.43
4.49	1.91	2.67	0.81						2.49	0.677164	3.21	0.9						3.28	0.31	2.89	1.35						1.67	0.4	1.05	0.95						3.01	0.92	2.17	0.81						1.02	1.43	1.66	0.99
3.2	0.39	2.68	1.35						3.76	1.28463	2.67	0.58						1.62	1.68	1.41	1.49						1.39	0.23	1.57	1.34						3.17	1.19	3.45	1.47						0.99	1.66	1.59	1.5
3.79	1	3.56	1.33						3.03	0.470395	2.53	0.43						2.77	0.33	2.88	1.67						1.87	0.16	1.61	0.7						1.97	0.96	2.3	1.12						1.19	0.97	1.72	1.02
3.4	0.32	1.54	1.34						1.96	1.18078	3.33	0.76						2.28	0.7	2.19	0.88						2.09	0.27	1.48	0.69						1.28	0.42	1.72	0.93						1.59	0.04	1.63	0.92
2.82	0.39	1.99	1.89						2.45	0.920098	2.82	0.92						3.04	1.1	2.13	1.05						2.32	1.87	2.34	0.73						1.78	1.24	1.22	1.61						1.2	1.38	1.64	0.65
3.02	0.18	7.48	0.58						3	0.827061	2.4	0.9						2.55	1.79	2.53	0.95						2.11	1.11	2.34	0.68						1.28	0.77	1.13	1.22						1.65	0.9	1.3	0.86
1.85	1.04	2.69	1.1						2.76	1.79638	2.27	0.51						2.2	1.64	1.93	0.7						1.04	0.39	2.15	1.33						1.78	0.64	1.27	0.87						1.26	1.34	1.78	0.9
3.2	1.71	2.58	0.87						2.69	0.227034	1.67	1.38						2.7	1.23	2.75	1.21						2.48	1.3	2.06	1.16						1.66	1.84	3.18	0.87						1.28	1.23	0.96	0.62
2.51	0.96	3.2	1.29						3.29	0.272505	2.8	1.2						2.81	0.24	2.49	1.05						2.75	1.24	1.89	1.41						1.24	0.58	1.56	0.5						1.38	1.63	1.31	1.3
1.65	0.88	3.65	1.46						4.24	1.12344	2.76	0.87						1.7	0.73	2.02	0.54						2.13	1.61	1.85	0.55						1.49	0.25	2.59	0.97						0.88	1.34	1.24	1.63
2.37	1.44	2.8	1.85						2.98	0.650053	1.68	1.71						1.83	0.58	2.36	0.71						0.78	1.56	1.82	0.95						1.65	1.17	2.55	0.75						1.88	1.21	1.52	0.59
3.01	0.46	3.35	1.43						3.97	0.450096	2	0.99						2.01	1.81	1.48	1.38						1.27	1.01	2.02	2.57						1.38	0.29	2.3	0.41						1.43	0.78	1.14	0.67
3.58	0.97	1.89	0.85						3.84	1.53859	2.97	0.89						2.28	2.05	2.05	1.08						1.93	1.72	1.16	2.03						1.99	1.28	1.71	0.64						1.49	0.2	0.98	0.81
3.49	0.57	2.68	1.15						3.56	0.448649	2.71	0.78						2.48	1.11	1.73	0.63						1.01	0.95	2.37	1.04						1.37	1.62	1.95	0.8						1.83	2.01	1.33	1.27
3.22	0.8	2.37	0.62						2.51	1.92697	3.22	0.69						1.72	0.88	1.52	1.08						1.21	0.77	3.69	0.91						1.68	0.83	2.24	0.54						1.23	1.01	1.75	1.16
5.1	1.15	2.53	0.84						1.82	1.76979	2.31	0.95						2.41	1	2.3	0.9						1.02	1.34	2.02	0.67						1.79	1.1	1.95	0.73						1.7	0.45	1.98	0.58
2.31	1	5.07	0.86						2.78	1.65	8.16	0.75						2.49	1.74	1.88	0.79						1.34	0.52	2.15	1						2.58	0.77	2.17	1.59						2.07	1.31	1.21	1.33
3.53	1.19	2.65	0.6						2.76	0.618353	1.58	1.22						2.39	1.12	1.56	1.01						1.69	1.16	3	0.96						4.87	0.81	2.87	0.96						1.23	1.07	1.61	0.9
3.08	0.21	4.44	1.12						4.81	1.39456	3.37	0.91						2.82	1.04	2.25	1.24						1.65	1.42	2.01	1.48						2.24	2.82	3.04	1.05						1.42	1.3	1.81	0.94
2.82	0.32	4.01	0.42						3.99	0.816409	2.32	1.29						1.98	1.48	2.37	1.2						2.06	1.53	2.33	1.16						1.79	1.17	1.68	0.67						1.45	0.35	1.08	1.15
2.13	1.69	2.42	1.01						2.61	1.69619	2.66	1.01						2.18	1.2	2.56	1.3						1.33	0.35	2.6	0.49						2.05	1.19	1.77	0.89						1.93	1.18	1.09	0.66
2.43	1.83	1.68	0.72						2.27	0.576279	2.14	0.91						1.64	1.03	2.82	1.07						1.42	0.47	1.83	0.92						1.77	1.39	2.57	0.39						1.46	1.14	1.47	0.62
3.8	1.46	3.29	1.54						1.88	1.52277	2.71	1.45						3.33	0.82	2.09	0.64						1.21	0.33	2.44	1.02						1.24	2.13	2.53	1.23						2.03	0.23	1.33	0.71
2.03	0.35	3.03	1.16						3.48	0.144456	2.86	1.37						2.02	1.22	3.05	0.67						0.89	1.03	2.3	1.01						2.82	0.86	2.05	0.5						1.02	0.95	0.96	1.21
2.5	1.79	3.72	0.86						3.06	0.197093	2.92	1.77						2.68	1.21	1.78	1.69						1.54	1.33	2.26	0.59						2.56	1.3	1.71	0.84						1.69	5.6	1.69	1.01
2.81	0.51	2.88	1.83						4.31	0.379063	3.09	0.6						2.41	1.39	1.98	0.62						1.79	1.12	1.41	1.35						2.69	0.92	2.11	0.44						1.62	0.76	1.16	0.71
2.84	0.31	3.25	1.23						2.14	2.26399	3.6	1.14						2.25	0.66	2.44	0.91						1.42	0.4	2.47	0.96						2.06	0.18	1.57	1.84						1.62	1.33	2	1.51
2.18	0.39	2.28	0.94						2.92	1.73809	2.55	0.72						2.01	1.94	2.84	1.17						1.54	0.68	2.44	1.15						2.28	1.33	1.09	0.75						1.82	1.23	1.56	0.92
2.73	1.36	3.14	1.18						2.55	1.36758	2	0.82						2.2	0.46	2.06	0.6						1.33	0.92	2.68	0.53						2.48	1.18	2.27	0.84						2.04	0.2	1.61	0.58
1.96	1.31	4.49	0.7						1.52	1.79801	2.11	0.87						2.62	0.81	1.87	0.64						1.24	0.94	1.63	0.66						2.78	1.24	3.01	1.06						1.52	1.6	1.1	0.84
1.49	0.76	4.34	0.96						3.58	1.46941	2.53	0.75						3.12	0.05	1.98	1.05						1.38	0.65	2.34	1.59						2.45	1.31	2.13	0.49						1.13	1.2	2.12	0.67
1.95	1.14	2.63	0.96						3.19	1.53423	2.68	2.7						1.6	0.4	3.31	1.08						1.71	2.07	1.75	1.59						3.06	0.48	1.92	1.85						1.41	0.77	1.15	0.66
2.83	1.54	3.27	0.54						2.91	1.02716	2.16	0.96						3.47	1.37	1.99	0.77						2.32	0.61	1.9	1.09						2.31	1.21	1.65	1.03						2.41	1.15	1.18	1.21
2.79	0.7	3.96	0.96						2.75	1.92471	2.47	1.14						3.05	1.04	2.36	0.58						2.26	1.39	3.75	1.01						1.32	1.18	1.9	1.1						2.11	1.52	1.59	1.01
1.83	0.87	2.18	0.33						2.06	2.11652	2.92	0.61						2.31	1.39	1.78	1.36						1.67	1.19	1.72	0.61						2.93	0.77	2.35	1.6						1.52	1.62	1.68	0.61
3.9	1.44	2.84	0.3						3.09	1.52949	2.38	1.01						1.29	0.41	2.48	0.83						1.66	2.35	1.22	0.98						2.63	0.72	2.46	0.5						1.45	0.37	1.21	1.34
4.04	1.64	3.07	0.59						3.24	1.39372	3.86	1.05						2.28	1.71	2.03	0.62						2.24	1.46	1.98	0.72						2.21	1.44	1.77	1.27						1.15	0.94	1.56	0.71
1.95	1.39	1.99	0.97						1.52	2.33907	2.77	0.49						2.18	1.75	2.42	1.02						2.08	1.71	2.61	0.47						1.58	0.89	2.46	1.23						1.21	0.92	1.26	0.32
2.95	0.93	2.01	1.01						3.07	1.63819	4.8	1.21						2.18	0.53	1.89	1.11						2.21	2.17	1.34	1.07						2.07	1.3	1.77	0.96						1.62	0.26	1.6	1.01
3.09	0.35	2.95	1.12						2.54	1.22808	3.2	0.47						2.49	1.55	2.01	1.18						1.26	1.02	1.95	0.71						2.54	1.59	2.18	0.99						1.75	1.24	1.15	0.78
1.74	1.87	3.81	1.05						2.86	1.52699	2.29	0.77						3.2	0.44	2.11	0.64						2.01	1.64	2.5	1.14						2.79	1.32	2.81	0.52						0.99	0.7	1.59	1.42
2.13	0.82	3.55	1.31						2.78	0.266932	1.73	0.86						2.72	1.17	1.94	0.67						2.11	1.28	2.67	0.88						2.72	0.93	1.45	1.16						1.78	1.81	1.26	0.93
2.89	1.26	3.61	1						3.43	1.7662	3.5	1.12						3.16	1.38	2.66	0.82						2.01	0.85	2.72	1.1						3.5	1.77	2.18	2.08						1.22	0.9	1.03	0.47
2.02	1.11	2.84	0.97						1.67	1.39241	2.33	1.03						3.42	0.43	2.39	1.22						1.15	1.72	1.84	1.25						1.83	0.43	2.37	1.21						1.73	1.88	1.1	1.98
3.48	1.39	2.37	0.56						3.06	0.24733	2.46	1.18						3.04	0.75	2.45	1.37						1.5	0.22	1.35	1.64						2.71	1.02	2.12	0.91						1.31	2.14	0.93	0.81
2.43	0.64	4.44	0.77						2.18	1.21138	3.73	0.76						4.51	1.18	1.9	0.91						1.61	0.28	2.1	0.76						1.66	1.9	1.51	1.64						1.54	1.45	1.28	0.65
3.21	1.18	3.46	0.78						1.84	1.4469	2.34	1.14						3.93	0.69	1.9	1.01						2.25	1.55	2.22	0.94						2.12	1.06	1.45	0.58						1.73	1.94	1.6	0.58
4.32	1.81	2	0.99						3.21	0.528639	3.06	1.34						2.77	0.9	2.14	1.12						1.66	0.89	1.72	1.4						1.78	1.38	1.81	1.54						1.32	0.94	1.51	0.93
5.75	0.38	3.29	0.91						3.21	1.38111	2.71	0.98						2.59	1.28	1.97	0.85						3.2	1.38	2.96	0.97						2.52	1.18	2.05	0.56						5.78	0.42	1.46	0.96
3.23	0.67	1.95	0.7						5.35	1.08302	2.65	1.04						2.2	1.15	2.84	0.81						1.8	0.87	1.5	1.06						3.3	1.14	2.13	0.87						1	0.99	1.3	0.76
2.57	1.26	3.67	1.42						3.14	0.21376	2.66	0.67						2.32	0.21	1.86	1.15						1.88	0.78	1.72	0.88						2.27	0.15	1.71	1.85						1.31	1.35	1.16	1.18
2.03	1.44	3.37	1.05						2.43	1.75347	2.75	0.89						1.07	0.2	1.34	1.26						3.24	0.73	2.04	0.97						3.96	0.45	2.91	0.68						1.76	0.25	1.44	0.52
4.43	1.21	2.68	1.15						2.53	0.523553	3.33	0.69						1.58	1.34	1.97	0.67						2.03	1.14	1.7	0.81						3.23	0.93	2.08	0.65						1.41	1.01	1.46	0.44
5.12	1.79	3.15	1.09						2.42	1.61651	3.39	0.86						1.56	1.83	1.8	1.42						1.85	2.23	2.16	1.22						1.58	0.23	2.35	0.94						2.03	0.7	0.82	0.63
3.34	0.36	2.73	1.42						2.67	0.522562	4.43	1.03						1.77	2.1	1.69	0.98						1.18	1.22	3.18	0.98						2.66	0.81	2.1	0.81						1.62	0.56	1.02	0.84
2.07	1.01	4.26	0.96						2.59	1.27947	2.86	1.48						2.75	0.37	2.73	1.32						2.17	1.42	2.42	1.1						2.19	1.14	1.47	1.55						1.25	0.38	2.97	0.64
4.33	1.68	2.77	0.56						3.03	0.263955	3.49	1.08						1.3	0.3	1.94	0.51						1.45	0.78	1.64	0.81						2.18	1.6	1.22	0.52						1.04	1.84	1.19	1.36
4.47	1.68	7.16	1.02						4.19	1.81812	2.41	1.48						2.37	1.7	1.38	1.3						2.35	1.72	1.78	0.89						3.15	1.53	1.89	0.79						0.99	1.32	1.3	0.61
3.55	0.45	2.73	1.36						3	0.774942	1.58	1.53						1.73	1.59	2.07	1.11						2.14	0.62	1.48	1.08						3.65	0.11	2.45	0.79						5.05	0.27	1.31	1.79
2.91	0.78	3.54	0.98						2.95	1.20676	2.17	0.85						1.95	1.33	2.18	0.91						1.21	1.31	2.55	0.69						3.52	0.63	1.96	0.51						1.97	0.64	2.1	1.66
1.95	1.19	3.29	1.58						2.03	1.32989	2.4	0.96						3.17	0.91	2.79	1.22						1.46	0.96	1.78	0.66						2.8	0.8	1.97	0.85						1.28	0.79	2.19	1.31
4.01	1.11	4.67	0.46						2.25	1.99359	2.86	1.19						1.91	1.49	2.07	0.38						1.86	0.18	2.08	0.56						2.21	0.6	2.08	0.94						1.84	0.49	1.31	0.52
3.7	1.11	4.16	0.67						2.65	0.243598	2.62	0.81						2.22	1.39	1.88	0.74						1.62	0.15	1.93	1.39						1.96	1.26	1.79	0.93						1.68	0.34	1.78	0.66
2.8	0.42	2.79	1.36						2.46	1.23866	2.52	2.11						2.16	0.94	2.8	1.18						1.68	1.59	2.55	0.73						1.65	1.23	3.02	0.79						1.61	0.26	1.51	0.7
2.12	1.9	3.97	1.34						2.22	1.14283	2.36	1.18						2.16	1.4	1.27	0.83						2.16	1.46	2.55	1.3						1.34	1.69	2.82	0.73						1.35	0.67	1.31	1.45
4.89	0.79	5.76	0.95						4.47	0.90623	1.38	0.99						2.23	1.37	3.02	0.69						1.31	1.25	0.98	1						1.6	0.83	2.32	0.56						1.54	2.07	0.82	0.8
3.2	0.02	3.89	0.72						3.63	0.405547	2.97	1.1						2.26	1.77	1.64	0.85						2.43	1.72	1.58	0.81						1.24	1.26	1.48	0.62						1.1	1.16	1.33	0.88
2.79	0.15	2.95	0.9						3.25	0.090603	2.51	0.83						1.59	0.27	1.72	0.87						1.66	0.23	2.2	0.71						2.33	1.08	1.89	0.51						2.08	1.16	1.07	0.9
1.75	1.82	3.94	1.11						2.1	1.6734	2.41	0.68						1.9	0.29	2.23	0.94						2.88	1.51	1.45	0.95						1.45	1.95	1.77	0.71						1.15	0.8	1.04	0.6
3.52	0.56	4.59	0.99						2.55	2.20154	2.82	1.09						1.08	1.47	2.37	1.4						2.23	1.79	2.4	1.1						1.95	2.15	2.17	1.49						1.36	1.02	1.32	0.97
3.96	1.1	4.03	1.09						2.23	1.02458	1.75	1.08						2.83	1.5	1.81	1.25						1.71	1.52	1.68	1.01						2.58	1.59	2.72	0.75						1.68	0.34	1.54	0.91
2.49	0.38	2.2	0.98						2.65	0.524089	3.43	0.63						2.53	1.32	2.18	0.81						3.17	0.41	2.5	1.34						1.21	0.44	1.75	0.92						4.95	1.35	1.05	1.51
4.85	1.37	3.08	0.88						1.64	1.04847	3.16	1.38						2.34	1.41	1.96	1.12						1.07	0.56	1.65	0.9						1.94	1.13	2.93	0.78						2.18	0.95	1.33	0.55
2.86	0.17	3.19	0.95						2.75	1.9039	2.82	1.07						3.84	0.49	2.98	0.55						1.32	1.11	1.99	0.81						1.53	0.39	2.14	0.45						1.6	0.63	1.58	0.76
2.21	0.41	3.43	0.82						3.7	0.42285	2.6	2.22						2.44	0.76	2.72	0.93						1.74	0.21	1.88	1.77						2.05	1.19	2.65	0.96						1.85	1.51	1.1	0.27
3.73	1.13	5.06	1.06						3.06	0.683226	2.85	0.87						4.11	1.36	1.93	0.88						1.29	0.67	1.91	1.14						2.46	1.1	3.13	0.88						2.1	0.82	1.88	1.09
2.23	0.91	2.08	1.05						2.57	0.537134	2.84	1.12						2.78	0.61	1.57	0.85						3.13	0.97	2.21	1.38						2.66	1.28	2.49	1.74						1.1	0.71	1.43	1
2.82	0.86	2.35	0.82						3.46	0.365535	2.14	1.02						1.55	0.43	2.42	0.87						1.64	0.15	4.98	0.9						2.91	0.64	2.65	0.61						2.14	1.64	0.83	0.92
3.83	1.47	2.94	0.74						3.39	0.366593	3.14	0.94						2.99	0.72	2.49	0.51						2.61	2.07	2.39	1.46						1.64	0.68	1.3	1.59						1.41	0.4	1.79	0.19
3.77	1.06	2.11	1.04						2.31	0.793782	2.96	0.86						2.72	0.84	2.2	0.73						1.75	0.16	2.44	0.67						2.33	1.34	1.81	1.03						1.34	1.42	1.67	1.01
2.85	0.22	1.98	0.61						2.43	0.918388	3.18	1.57						4.83	1.38	2.48	1.1						1.63	0.9	1.57	1.17						2.67	1.39	2.51	0.87						1.57	0.3	1.57	0.61
1.84	1.59	2.06	0.55						2.21	1.40723	2.25	0.62						2.71	1.27	1.92	0.99						2.1	0.87	1.92	1.02						2.14	1.19	1.6	1.55						1.1	1.17	1.11	0.56
4.07	0.9	1.45	0.43						3.09	0.351508	4.21	0.84						2.89	0.68	1.93	0.68						1.84	0.17	2.9	1.18						2.73	1.72	2.21	0.67						1.37	0.82	1.29	1.48
3.29	1.04	2.47	1.03						3.65	0.270245	2.45	0.89						3	0.23	2.18	0.58						2.3	1.1	2.61	0.96						2.02	0.33	1.46	0.65						1.66	0.15	1.83	1.02
2.63	1	2.86	0.56						3.04	1.18176	2.63	1.27						1.73	0.14	2.08	1.87						2.2	1.63	2.57	0.76						1.08	0.94	1.75	1.7						1.64	0.26	1.01	1.35
3.24	1.75	2.68	0.94						3.12	0.318589	1.77	0.71						2.66	1.22	2	0.95						2.92	1.22	3.19	0.83						2.01	1.58	1.68	1.78						0.91	0.12	1.28	1.01
4.25	1.72	2.65	1.51						1.82	2.00264	3.26	0.89						2.43	0.81	2	0.51						1.39	1.11	1.58	1.14						2.45	1.14	1.87	0.74						2.03	1.3	1.48	1.05
2.85	0.92	1.92	1.22						3.06	1.32817	3.74	0.78						2.81	0.29	2.65	1.67						1.63	1.13	2.86	1.1						1.85	0.94	2.26	0.87						1.83	0.19	1.36	1.32
2.73	0.74	2.44	1.49						2.26	0.402027	2.8	0.96						2.85	1.01	2.57	1.16						2.4	1.31	3.19	0.83						1.67	0.87	1.57	0.45						1.41	0.91	1.14	1.13
2.09	1.32	2.6	0.98						2.45	0.216225	2.66	1.01						3	0.9	1.78	0.88						2.12	1.07	2.31	1.26						1.72	0.35	1.65	0.69						2.16	0.95	1.51	0.63
1.77	0.8	3.96	0.92						1.97	1.80979	2.91	0.75						1.59	0.21	2.26	0.85						2.27	1.2	2.06	0.59						2.09	0.63	1.33	1.12						1.38	0.85	1.68	0.98
2.67	0.32	2.81	0.54						2.06	0.554333	2.23	2.18						2.18	1.02	2.27	0.84						2.14	1.16	2.11	0.82						2.23	1.49	2.58	1.61						1.55	0.17	1.28	1.95
2.61	0.34	2.63	1.13						1.83	0.579152	1.92	0.76						3.02	0.31	1.74	1.1						1.89	0.75	3.73	0.98						1.92	1.15	4.6	0.92						1.81	0.35	2.73	0.66
2.74	0.44	3.89	1.08						2.34	0.203646	2.09	1.02						2.81	0.94	2.07	0.93						2.36	1.14	2.3	0.96						3.17	1.73	2.45	1.15						1.16	1.62	1.08	0.65
2.58	1.34	2.71	1.17						1.46	1.37702	2.77	0.97						2.42	1.47	2.04	0.9						1.49	2.07	2.56	0.81						2.76	1.24	1.96	0.47						1.5	0.11	1.68	1.01
2.53	0.39	2.4	1.51						2.49	1.23656	1.7	0.87						3.54	0.22	1.68	1.63						1.37	1.26	1.9	0.96						1.6	0.55	1.31	0.83						1.43	0.73	1.06	0.83
3.39	1.52	2.88	1.03						2.51	0.66954	3.97	0.85						1.67	1.72	3.16	1.35						1.68	0.25	3.79	0.88						2.26	1.58	1.95	0.64						1.46	0.83	1.91	1.01
3.65	0.93	1.78	0.94						1.27	0.743293	2.51	0.76						3.37	0.62	2.29	0.71						2.74	0.85	2.6	0.7						1.39	0.53	2	1.1						1.78	1.12	0.9	0.64
2.24	0.4	2.97	1.27						2.56	0.395757	2.13	0.77						3.36	0.39	1.89	0.71						2.1	0.55	2.26	1.29						2.73	0.9	2.48	0.53						0.82	0.37	1.41	0.64
3.02	1.54	2.38	0.57						2.27	1.73983	2.51	1.42						1.87	0.47	2.35	0.71						2.21	1.77	1.09	0.99						1.79	1.1	2.42	0.55						1.4	0.57	1.18	0.53
2.71	0.31	2.23	0.66						3.06	0.656306	2.11	0.6						2.99	0.8	2.26	0.68						1.41	0.66	2.38	0.91						3.64	0.65	2.45	0.89						1.33	1.79	1.65	0.48
2.06	0.71	3.15	1.24						2.37	0.144555	4	1.02						3.3	0.23	2.37	1.09						1.91	1.1	5.81	0.51						3.41	1.01	1.4	0.48						1.51	0.11	1.68	0.99
3.21	0.95	3.32	1.13						3.34	1.27783	1.97	1.97						1.61	0.2	1.97	1.24						4.01	0.37	1.68	1.33						2	0.29	1.61	2.4						1.33	0.82	1.08	1.02
3.59	1.51	3.63	1.09						2.46	0.885418	2.44	0.65						2.65	1.46	1.24	0.96						1.45	1.5	2.12	0.73						2.73	1.3	2.04	1.06						1.55	0.36	1.86	0.92
3.26	1.44	2.9	1.34						2.14	0.696207	1.77	0.5						1.58	0.45	1.99	0.36						1.65	1.26	2.88	1.06						3.3	0.48	1.73	1.18						1.56	0.31	1.6	1.13
1.85	1.43	2.88	0.89						1.81	0.482906	2.86	1.62						3.26	0.34	2.68	0.88						1.93	0.15	1.8	1.26						1.78	1.51	1.43	0.87						1.34	0.74	1.07	1.39
4.23	1.9	2.16	1.21						2.34	0.478524	1.97	0.53						2.43	1.28	2.56	0.88						1.75	0.2	3.25	1.14						2.42	1.22	2.43	1.29						1.28	1.51	1.1	0.58
2.27	0.28	2.66	1.19						2.05	1.69721	3.17	0.91						1.21	0.3	1.84	2.01						1.18	0.18	2.51	0.64						2.34	0.9	2.13	0.63						1.07	1.3	1.68	0.59
2.29	0.44	3.07	1.12						3.26	0.960762	2.1	2.72						1.82	0.95	2.36	0.74						1.95	1.22	3.1	0.95						2.44	1.12	2.74	0.88						1.43	0.98	1.57	1.38
2.43	0.88	2.69	1.28						2.49	0.281615	3.1	0.82						0.99	0.19	1.46	0.91						1.92	0.71	2.62	0.73						1.53	1.44	1.35	2.17						1.94	1.1	1.44	0.85
2.92	0.47	2.55	2.29						2.3	1.00025	2.87	0.87						1.74	1.71	1.59	1.59						2	0.28	1.6	1.63						1.68	2.66	2.06	0.64						0.98	0.86	1.07	0.79
3.3	1.66	2.58	1.07						1.75	0.041538	3.3	0.88						1.97	0.54	1.3	1.03						1.97	1.08	2.4	0.72						1.08	0.8	1.94	1.08						1.37	0.43	1.19	1.26
2.25	0.93	2.89	0.94						2.61	0.697703	2.9	1.07						2.35	0.59	2.25	0.95						3.06	1.09	2.17	0.54						1.03	0.43	1.41	0.59						1.05	1.34	1.96	1.07
4.05	0.85	3.78	1.45						2.68	0.392371	2.29	0.88						2.55	0.15	2.23	1.05						1.58	1.08	2.36	0.64						1.66	1.44	2.7	0.87						1.3	0.37	1.33	0.53
4.5	1.1	4.34	0.8						4.38	0.999058	2.11	0.57						2.03	0.97	1.65	1.22						2.34	1.53	1.9	0.72						1.69	1.76	2.41	1.78						2.8	0.99	1.37	0.55
4.2	1.24	4.53	0.9						5.3	1.28348	3.56	1.01						1.88	0.91	1.75	0.65						0.97	1.32	2.92	0.98						1.77	1.66	2.6	0.91						1.64	0.51	1.19	1.01
2.45	0.26	1.98	0.85						2.13	3.11548	3.23	0.78						1.67	2.95	2.17	0.66						1.73	1.14	3.45	2.75						2.15	0.23	1.55	2.34						1.75	0.61	1.14	0.75
4.51	1.45	2.5	1.26						2.61	1.62698	2.17	0.73						2.12	1.64	2.69	1.17						1.54	1.37	2.25	1.37						1.49	0.45	2.49	1.89						1.61	0.37	1.58	0.79
1.85	1.42	3.47	0.34						3.85	1.34247	2.88	1.02						2.06	1.57	2.58	0.98						1.06	0.63	1.1	0.91						1.78	2.06	2.54	0.59						2.14	1.26	1.02	1.37
2.55	0.23	4.18	0.69						4.08	1.55689	2.47	1.17						2.33	0.57	1.8	0.77						2.21	0.82	1.21	0.84						2.46	0.98	1.38	3.19						1.84	1.62	0.96	0.3
2.81	1.25	3.41	0.99						3.43	1.07038	2.29	1.13						2.17	1.29	2.66	0.9						1.71	1.67	2.96	1.07						2.53	1.15	1.37	0.75						1.36	1	1.8	0.75
3.48	0.58	3.77	1.23						2.17	1.57953	1.96	0.48						1.86	1.72	3.27	1.46						1.33	0.97	1.15	1.21						1.52	0.35	1.9	1.15						1.6	0.63	1.15	1.22
2.26	0.63	2.59	0.92						1.92	1.67115	2.26	0.64						1.74	2	2.77	0.59						1.07	0.93	2.04	0.84						2.04	2.71	1.2	2.04						1.84	0.52	1.45	0.69
4.67	0.98	4.52	0.68						3.77	0.540736	1.88	0.97						1.4	1.8	1.89	0.73						1.26	1.43	1.96	1.26						1.9	1.42	2.39	0.53						1.91	0.71	1.28	1.46
3.11	1.04	2.62	1.1						3.26	0.159837	8.01	0.83						2.98	0.99	3	0.67						1.34	0.41	1.37	0.98						1.4	0.65	2.42	0.65						1.53	1.32	1.11	1.2
3.04	0.21	2.89	1.18						3.3	0.237977	2.64	1.05						2.18	0.91	1.92	1.01						1.8	0.74	2.41	0.74						2.41	1.25	2.13	2.63						1.65	0.42	1.95	0.62
3.33	0.98	4.28	0.73						2.93	0.257824	2.78	1.11						1.7	1.11	1.68	0.96						1.37	0.23	2.37	0.76						2.17	0.95	2.8	0.54						1.23	1.12	1.88	1.25
3.13	0.15	4	0.54						1.91	1.54097	2.49	1.06						2.71	1.05	1.81	0.87						1.42	0.87	1.33	1.01						1.7	1.56	2.05	1.07						1.23	1.51	1.38	0.73
2.53	0.5	3.56	1.14						3.13	0.192816	3.41	0.67						2.2	1.97	2.31	1.76						1.17	1.02	2.13	0.9						2.72	0.46	1.69	1.73						1.13	1.47	1.64	0.63
1.94	0.95	3.56	1.24						3.66	1.24711	4.45	0.91						2.73	1.73	1.99	0.86						3.48	0.99	2.57	1.04						2	1.18	2.36	0.53						5.29	0.49	1.91	0.76
6.08	1.03	4.66	0.74						2.6	0.779783	3.69	0.64						2.15	1.25	3.42	0.72						1.94	0.61	2.24	0.83						1.34	0.79	1.31	0.56						1.16	0.92	1.67	0.84
3.16	2	3.75	1.02						2	2.43589	2.16	1.07						2.67	2.35	2.64	1.44						2.01	1.51	2.09	1.08						1.99	1.29	2.05	0.78						1.33	0.58	1.39	0.61
2.41	1.06	4.35	0.78						3.81	1.8283	2.21	1.04						1.63	0.59	1.44	0.62						1.08	2.3	1.68	0.8						2.16	1.25	2.67	1.92						1.36	0.96	2.04	0.74
1.97	1.32	4.29	0.72						2.95	0.959766	1.72	0.75						3.67	0.45	2.17	1.75						1.45	0.75	1.72	1.71						1.63	0.32	1.39	0.68						1.4	0.42	1.06	0.99
2.63	0.3	3.14	0.67						3.64	0.115058	3.41	1.08						3.18	0.31	2.56	1						0.93	0.94	1.69	0.96						1.55	0.59	1.96	1.25						1.47	0.13	1.18	0.76
4.13	0.99	2.42	1						3.31	0.586582	3.11	1.14						2.25	2.61	2.34	1.05						1.17	0.98	2.3	1.29						1.35	1.16	1.53	0.81						1.71	0.22	1.47	0.81
2.83	0.4	2.1	0.88						2.12	1.59485	2.42	1.09						2.71	1.07	2.06	0.88						1.49	0.53	1.93	0.81						2.09	1.03	1.59	0.92						1.66	0.9	0.95	1.28
2.72	0.45	1.83	1.45						3.73	1.10126	2.95	1.65						2.89	0.96	2.02	1.68						1.62	1.01	1.17	0.98						1.77	1.41	1.61	2.7						1.02	1.27	1.83	0.8
4.29	1.5	3.14	0.82						2.62	0.905213	1.91	0.64						2.38	1.75	1.45	0.8						1.79	1.96	1.67	0.71						2.1	0.9	1.93	0.49						1.62	0.17	1.72	0.83
3.58	1.28	3	1.13						2.97	1.13269	3.77	0.75						3.15	0.59	2.56	0.79						4.01	1.13	2.48	1.39						2.22	1.99	1.9	1.15						1.37	0.99	1.73	1.29
3.14	0.4	3.59	0.76						3.73	0.287628	3.31	1.31						1.67	0.23	1.58	1.39						1.71	1.5	1.07	2.48						1.62	0.96	2.24	0.69						1.39	1.23	1.05	1.47
4.11	1.52	3.1	1.61						2.59	0.368306	2.66	0.85						2.2	1.32	2.05	0.76						1.11	0.57	1.59	1.03						1.88	0.27	2.59	0.9						1.74	0.64	1.48	1.67
2.53	1.24	2.92	1.41						2.87	1.1066	3.09	1.2						2.21	1.33	1.87	0.49						1.18	1.3	1.93	0.33						3.12	1.67	1.76	2.29						1.48	0.38	1.13	0.53
2.86	0.74	2.53	0.64						4.11	1.21127	2.46	1.06						1.63	0.29	2.71	1.26						2.17	1.01	2.79	1.1						1.65	0.17	2.72	0.82						1.17	1.35	1.41	0.67
2.15	1.12	2.86	1.52						2.89	0.792619	2.12	0.79						2.08	0.36	2.29	1.33						1.76	1.11	1.24	1.23						1.78	0.15	3.74	0.52						1.75	0.42	1.15	1.02
3.09	0.16	2.5	0.71						2.36	1.3179	2.07	0.96						1.54	0.15	2.34	1.05						1.35	0.47	2.32	1.14						3.12	0.93	2.15	0.91						1.79	0.83	2	0.65
1.9	0.56	2.98	1.61						1.33	2.51455	1.55	1.41						2.84	1.19	1.88	1.34						1.81	1.79	2.74	0.54						2.21	0.25	1.77	0.56						1.95	0.59	1.17	0.67
5.46	1.26	2.37	0.71						4.5	1.31091	2.1	0.87						1.98	0.96	1.62	1.23						1.53	0.28	3.2	1.03						2.17	1.36	1.68	0.82						1.51	0.13	1.05	0.75
3.03	0.3	4.23	0.88						3.14	1.01764	3.05	0.73						1.83	0.47	3.03	0.59						1.93	0.46	2.32	0.84						3.12	0.29	1.24	3.25						1.46	1.53	1.76	0.72
2.62	0.29	3.18	1.34						3.25	0.434787	2.53	0.82						1.71	0.57	2.25	1.03						1.42	0.56	3.11	0.79						3.11	0.72	1.8	0.62						1.4	1.04	1.97	0.85
2.79	0.3	2.67	0.7						4.38	1.75214	4.42	1.03						3.12	0.52	2.07	1.49						5.42	1.1	1.41	1.03						2.02	1.02	2.1	1.74						1.47	0.87	1.35	0.64
3.56	1.56	2.11	0.33						2.21	1.57952	4.66	0.89						1.82	0.41	1.66	0.31						2.32	0.85	2.45	1.05						3.63	1.26	3.75	0.78						1.49	0.96	1.1	1.27
2.85	0.3	3.13	1						3.16	0.414708	3.03	1.33						3.11	0.69	1.94	1.39						1.13	1.28	1.56	0.66						1.8	0.4	2.71	0.72						1.23	0.73	0.94	0.71
3.79	1.41	1.99	1.2						2.52	1.26418	4.26	1.03						3.37	1.15	3.07	0.77						1.77	0.31	1.86	2.54						1.74	1.39	1.5	1.76						1.15	1.4	1.11	1.42
1.9	0.86	2.95	1.04						2.6	1.55443	3.27	0.94						2.65	1.22	2.83	0.92						1.45	0.19	3.47	1.21						3.21	0.89	3.2	1.28						1.79	1.12	1.42	1.55
4.3	0.68	2.58	1.17						2.82	0.416738	3.01	1.99						2.99	0.63	2.12	1.07						1.69	0.3	1.29	1.16						2.19	1.56	1.78	1.7						1.52	0.47	1.4	1.12
3.47	1.26	2.14	1.49						3.2	1.59777	3.55	1.31						2.87	1.48	2.92	1.06						1.51	0.2	1.69	0.7						2.06	1.05	3.57	0.71						1.26	1.17	1.62	1.37
3.66	1.43	2.32	0.63						4.19	1.96629	2.7	0.83						2.6	1.33	1.91	0.55						1.64	0.62	2.49	1.46						2.42	0.88	2.55	0.55						1.86	1.47	1.34	0.73
2.33	1.06	2.19	0.94						4.03	0.858705	2.19	1.1						3	1.05	2.9	0.84						2.12	0.91	1.82	1.07						2.68	0.85	2.37	2.37						1.5	0.86	1.37	1.68
3.26	0.25	3.16	0.97						3.47	0.320144	2.91	1.05						1.81	0.81	2.21	0.9						2.02	1.01	3.15	0.94						2.63	0.84	2.14	0.47						1.16	1.46	1.06	0.8
1.94	0.89	2.66	1.27						3.79	0.195542	2.57	1.38						2.8	0.98	1.83	0.7						2.73	1.58	1.2	1.86						0.99	0.41	2.2	0.79						1	0.88	1.66	1.23
2.32	1.76	3.94	0.93						4.47	1.36502	2.62	0.92						3.12	0.78	1.81	1.07						2.38	0.84	2.02	0.91						1.41	1.04	1.61	2.01						1.5	0.62	1.34	1.05
1.53	1.78	5.45	1.01						4.43	1.28418	3.23	0.89						2.3	1.54	3.01	1.62						1.92	0.97	2.7	0.99						2.16	0.88	1.71	0.57						2.77	1.11	1.6	0.64
2.98	1.21	4.44	0.67						1.48	1.27379	3.6	0.74						1.9	1.09	2.44	0.96						2.72	0.47	1.66	0.86						1.43	0.5	2.96	0.61						1.79	0.17	1.46	0.82
1.85	1.25	2.23	1.07						2.73	2.1922	3.13	0.92						1.21	0.18	2.33	0.73						1.48	0.47	2.52	1.19						1.95	1.29	1.97	0.6						1.06	1.05	1.42	1.26
3.06	1.41	2.05	1.31						2.44	1.4645	3.35	1.18						1.42	0.22	1.8	1.34						1.77	1.57	1.75	0.53						1.37	0.52	1.85	0.86						1.85	0.21	1.51	0.63
2.5	0.26	3.78	1.22						2.83	1.84355	2.29	1.04						1.45	1.53	2.05	1.42						1.53	0.7	3.09	0.92						1.34	0.55	2.33	2.18						1.37	0.74	1.07	0.59
3.69	1.23	4.21	0.92						2.31	0.247351	1.87	0.87						2.11	1.61	3.01	1.07						1.57	1	2.81	0.82						1.38	0.97	2.51	1.14						1.66	0.52	1.77	1.27
2.39	0.26	4.5	0.75						2.3	0.988183	2.13	0.96						2.63	0.42	1.93	1.11						1.8	1.08	2.61	1.09						1.76	0.48	2.56	1.37						1.17	0.64	1.06	1.18
1.82	2.31	2.83	1.46						1.71	1.40662	2.32	1.11						2.52	0.25	2.22	1.17						1.66	0.19	3.39	1.07						1.82	1.51	2.18	0.53						1.44	1.46	1.45	0.59
3.5	1.16	2.81	1.19						2.13	0.352565	3.05	1.56						2.23	0.78	2.28	1.16						1.74	1.65	1.97	0.82						2.69	0.8	1.76	2.48						1.9	0.81	1.31	1.35
2.69	1.66	3.41	1.6						2.11	0.847988	1.87	0.64						1.47	1.7	1.9	0.72						1.28	0.38	1.72	1.23						1.83	0.34	1.6	0.54						1.29	1.36	1.44	1.42
4.42	1.88	1.99	0.96						2.25	1.11814	3.25	0.75						2.62	0.33	1.8	0.77						1.94	0.79	1.09	1.39						3.4	0.47	1.34	1.17						1.47	0.6	1.55	1.58
4.01	1.23	2.46	1.16						2.16	1.07687	3.34	1.19						2.14	0.88	1.75	0.48						2.24	1.76	2.72	0.95						3.27	0.4	1.54	0.64						1.14	0.62	1.93	0.87
2.81	1.22	2.18	1.08						2.07	0.326708	1.6	0.75						2.64	1.11	2.26	1.1						1.79	0.51	1.88	0.96						1.28	0.86	2.45	1.31						1.15	0.9	1.94	0.69
1.76	1.07	1.64	0.87						3.74	1.35683	3.18	1.07						1.29	0.93	2.04	1.27						1.95	1.42	1.96	1.26						1.58	0.71	1.58	0.6						1.42	0.97	1.15	1.35
2.46	0.81	2.91	1.25						4.1	1.57838	3.59	1.42						2.08	1.06	2.38	0.95						1.16	1.13	2.48	0.82						1.76	0.95	1.35	0.62						1.12	1.15	1.19	0.58
2.35	0.66	1.53	1.02						2.77	0.142396	2.56	1.08						2.65	0.33	2.17	0.84						1.46	0.65	2.51	1.04						1.55	1.19	1.7	1						1.96	1.35	2.1	1.04
3.56	1.17	2.2	1.21						3.3	0.964883	3.2	0.98						1.36	0.34	2.32	0.89						2.19	0.93	4.62	0.76						1.05	0.87	1.9	0.6						1.71	0.16	1.53	0.75
3.08	1.85	3.09	1.15						3.62	1.24848	3.31	0.96						1.82	2.15	3.49	0.94						1.6	1.89	2.9	0.78						2.46	2.08	1.45	0.71						1.24	0.69	1.13	1.15
2.22	1.48	2.71	0.7						3.05	0.284472	3.33	0.79						2.81	0.32	1.56	0.92						2.01	1.76	2.33	0.67						2.1	0.57	1.65	1.3						1.57	0.92	2.11	0.6
2.99	1	1.87	1.21						3.71	1.31769	3.6	0.88						2.59	0.28	2.52	1.45						1.76	0.56	1.38	1.17						1.55	0.42	1.36	0.51						1.2	1.02	1.04	0.56
2.27	1.18	3.81	0.92						4.68	1.19496	4.14	1.06						1.79	0.91	2.94	1.01						2.41	1.97	1.87	0.73						3.79	0.19	1.49	0.9						1.46	1.04	1.01	1.18
3.43	0.23	2.71	1.02						1.56	0.409031	1.91	1.03						1.99	1.12	3	1.16						1.21	1.54	1.64	0.48						2.67	0.89	1.81	2.04						1.69	1.29	1.24	0.91
2.94	0.67	2.65	1.43						1.94	0.452988	2.67	0.87						1.8	1.82	2.07	0.97						2.69	1.38	2.4	1.39						2.25	1.34	1.85	1.51						1.44	0.41	1.19	1.16
3.59	0.87	3.06	1.28						1.81	0.737076	2.39	0.88						2.75	0.25	1.89	0.99						1.86	0.81	1.61	1.12						2.25	0.56	1.85	1.17						1.71	1.2	1.78	1.18
2.02	0.76	4.51	0.59						3.28	0.310051	2.63	0.83						2.02	1.35	2.18	0.32						2.41	1.36	1.57	0.89						2.07	1.37	2.12	0.79						2.13	1.03	1.48	0.83
2.46	0.92	3.25	0.98						3.94	1.08635	2.02	0.98						2.96	1.27	1.7	0.97						1.62	0.08	1.34	1.65						1.42	0.9	1.57	0.9						1.16	0.57	1.1	0.99
3.07	0.32	2.63	1.39						2.07	0.574333	4.28	1.02						3.16	0.74	1.74	0.96						1.62	0.16	0.93	1.08						2.38	1.19	1.93	1.17						2.08	1.45	1.32	0.88
3.71	1.44	2.79	1.06						2.21	1.12573	2.04	0.62						2.48	0.55	1.69	0.57						1.82	0.46	1.48	0.88						1.77	0.28	1.74	1.43						1.31	0.86	1.46	0.76
3.01	1.54	3.35	0.75						3.21	0.380484	2.66	0.89						2	0.83	2.27	0.89						1.76	0.54	1.36	0.78						2.05	1.46	1.03	0.69						0.98	1.05	1.46	1.23
4.05	2.34	3.34	0.89						2.28	0.797578	2.14	0.72						2.68	1.03	1.72	1.9						1.29	1.81	1.71	1.29						3.1	0.88	1.92	2.17						1.53	1.39	1.2	0.46
2.6	0.31	3.35	1.07						3.86	1.15858	2.92	1.01						1.88	0.71	2.91	0.74						1.38	1.1	1.72	0.89						1.8	0.97	2.4	0.72						1.39	1.17	1.68	0.99
2.37	0.87	2.46	0.64						2.93	0.33455	2.92	0.77						1.94	0.95	2.11	0.67						2.31	0.67	1.77	0.94						1.78	0.42	2.5	0.7						1.21	1.27	1.37	1.43
3.04	0.42	2.23	1.37						3.68	1.05833	2.82	1.32						2.35	1.12	3.04	1.16						2.1	1.35	3.42	0.8						2.3	1.43	2.2	0.74						2.02	0.34	1.26	0.57
2.15	2.13	3.52	0.77						3.69	0.29195	3.47	0.9						1.85	0.93	1.9	1.03						2.64	1.13	1.9	0.47						2.16	0.78	1.78	1.58						1.2	0.77	1.56	0.64
6.2	0.49	2.95	1.02						3.21	0.291083	4.01	0.99						1.76	0.11	3.02	0.79						2.44	1.03	3.63	0.7						1.88	0.21	2.79	0.85						1.26	1.26	1.5	1.44
3.21	0.48	2.7	1.43						5.14	1.01076	3.44	0.84						1.57	0.32	1.95	0.78						3.09	1.22	3.48	1.01						2.73	1	1.45	1.35						1.06	1.24	1.56	0.59
2.22	0.97	2.56	0.81						3.61	1.05425	2.45	1.06						3.15	0.85	1.51	1.34						1.88	0.31	2.38	0.76						1.92	0.1	1.91	1.38						1.19	0.82	1.59	0.49
2.26	1.75	2.98	1.33						2.93	0.894752	2.5	0.91						2.86	0.83	2.75	1.24						2.48	1.87	2.53	0.79						2.08	1.11	1.98	0.61						1.28	1.12	1.77	0.65
2.41	1.3	2.41	0.98						3.42	0.230939	3.41	0.86						2.16	1.76	3.21	1.06						2.88	2.39	1.99	0.93						2.6	0.9	2.49	0.7						1.73	0.72	0.86	1.03
5.79	0.5	3.14	1.61						4.03	1.4461	2.58	0.98						2.39	1.38	1.83	0.78						1.82	1.12	2.71	1.01						2.58	1.27	3.11	0.46						1.36	1.37	1.17	0.84
2.8	0.29	3.42	1.08						3.35	0.175583	2.9	1.02						3.53	0.21	1.88	0.89						2.25	1	2.52	1.05						2.02	0.61	2.45	0.6						1.29	1.01	1.37	0.89
3.08	0.29	2.74	1.49						3.12	0.509351	3.51	0.96						1.95	1.43	3.69	0.71						1.86	0.13	1.89	1.57						3.41	1.04	2.06	1.15						1.87	0.13	0.84	0.8
2.93	0.62	3.02	0.53						2.41	0.481883	2.39	1.16						2.65	1.1	2.19	0.68						1.08	0.53	2.5	0.72						2.77	0.92	3.23	1.9						0.84	1.58	0.85	0.2
2.25	1.48	3.57	0.61						2.64	1.2528	2.48	0.9						3.05	0.21	1.75	1.02						2.53	0.83	2.02	0.73						2.24	1.4	2.67	1.17						1.36	0.73	1.21	1.07
3.06	0.23	3	1.39						2.98	1.75081	2.07	0.93						2.01	0.29	2.17	1.2						1.76	0.15	2.2	0.89						2.48	1.28	1.95	1.72						1.67	0.35	1.76	1.05
2.07	1.48	2.47	1.45						4.2	0.837459	2.44	1						1.82	0.29	2.16	0.92						1.88	0.23	2.94	0.99						1.34	0.3	2.99	0.84						1.36	1.12	1.26	0.69
2.01	0.91	4.72	0.83						1.74	1.787	3.17	1.41						2.92	1.39	2.65	1.03						2.63	1.02	3.86	1.17						2.57	0.81	2.36	1.65						1.34	0.83	1.15	1.1
3.77	1.72	2.6	0.73						3.11	1.2958	1.99	0.64						1.78	0.2	1.51	1.08						2.49	1.51	2.62	0.82						1.41	1.72	1.61	0.46						1.32	1.51	0.99	1.16
2.41	0.5	3.54	1.31						2.38	0.498411	2.38	0.75						3.37	1.14	1.6	1.53						1.93	0.8	2.98	1.37						1.45	0.33	1.64	0.47						1.66	1.38	1.38	1.52
3.85	1.62	2.95	1.55						2.34	0.421285	1.92	1.35						4.15	0.82	1.38	0.3						1.89	0.23	2.2	1.01						1.47	1.43	3.05	1.6						1.19	1.66	1.21	1.73
3.17	0.73	3.03	1.1						3.73	1.64888	3.35	0.77						2.78	1.54	1.86	1.25						2.53	1.24	2.12	0.41						1.49	1.1	1.74	0.81						1.48	1.74	1.51	0.7
3.28	1.74	3.21	1.34						2.3	0.465243	2.72	0.88						2.86	1.24	2.33	1.42						1.28	1.27	2.96	1.24						2.32	0.86	1.59	2.41						2.21	0.95	0.77	0.86
3.24	0.41	4.06	1.01						2.54	0.192577	1.68	0.76						1.62	0.13	2.72	1.33						2.25	0.73	1.76	0.65						2.57	0.97	2.15	0.48						1.42	1.67	1.36	1.17
9.28	1.4	2.84	0.97						2.14	1.50012	2.08	0.95						2.57	0.8	2.33	1.35						1.56	0.36	1.71	1.3						1.79	1.28	2.6	0.68						1.49	0.45	1.57	1.44
2	1.7	3.59	0.97						2.17	2.45443	2.07	0.83						1.18	0.31	2.85	1.33						2.32	1.26	3.06	1.2						2.11	0.78	1.56	1.39						1.61	0.36	1.16	0.46
3.13	0.12	3.15	1.02						2.13	1.20981	1.57	1.09						2.31	0.88	1.44	1.57						3.56	0.33	1.65	1.23						3.04	1.41	1.91	1.44						1.61	0.28	1.96	0.94
4.01	1.31	4.04	0.58						3.4	1.58848	2.13	1.03						1.38	1.08	1.08	0.88						1.86	0.5	2.88	1.24						1.4	0.51	2.17	0.74						1.47	1.11	1.13	0.86
4.15	1.46	3.61	1.35						1.9	1.01307	2.58	0.73						2.29	1.58	2.29	0.77						1.17	2.01	2.82	0.77						1.5	2.48	1.89	1.14						1.83	0.89	1.46	0.72
2.18	1.41	3.48	1.14						1.41	1.18805	2.91	1.28						2.42	1.49	5.65	0.5						1.51	0.32	2.31	0.79						1.61	1.81	1.75	0.81						1.49	0.37	1.16	0.9
2.73	0.31	3.16	1.01						2.09	2.72743	2.65	1.3						2.73	0.14	2.42	0.72						3.27	0.66	2.17	0.49						2.58	1.13	3.48	0.72						1	1.42	1.1	0.95
1.93	1.18	3.49	1.1						2.47	0.480076	1.97	0.86						1.76	1.76	2.5	1.29						1.4	1.43	2.48	0.59						1.64	1.4	1.37	2.28						1.72	1.21	1.76	0.85
3.76	1.21	3.95	0.65						3.16	0.270261	2.4	0.81						2.28	0.78	2.8	1.03						1.22	0.32	2.07	0.79						1.47	1.19	1.77	0.89						1.26	0.93	1.57	1.64
3.38	0.61	3.19	0.88						3.86	1.6072	3.89	0.97						2.67	0.53	1.62	0.81						1.35	1.07	2.49	0.66						2.51	1.01	2.87	0.86						1.86	0.15	1.27	0.83
1.81	1.97	2.54	0.95						1.88	0.925471	2.27	0.91						2.21	1.42	2.35	1.16						1.64	1.16	1.5	1.26						1.84	1.49	2.05	0.5						1.81	1.27	1.47	0.86
3.28	0.19	2.22	0.81						2.73	1.02948	1.85	1.15						3.26	0.34	2.18	0.74						1.92	1.13	1.47	0.88						3.01	0.6	1.48	0.8						1.88	1.09	1.35	0.99
3.81	2.05	2.58	0.92						4.44	2.16861	1.83	0.95						1.59	1.22	1.85	1.4						0.96	0.75	2.56	0.68						3.09	0.49	1.75	0.61						1.41	0.02	1.55	1.04
3.35	0.86	2.93	0.79						2.43	0.759408	1.78	1.28						2.88	1.18	2.63	0.83						1.38	0.12	2.09	1.17						2.88	0.86	1.55	0.8						1.29	2.02	2.28	0.52
2.62	0.86	3.96	0.83						4.57	1.29659	2	0.66						1.96	1.02	1.82	0.63						1.92	1.1	2.2	0.72						3.49	0.53	2.07	0.67						1.37	0.83	1.45	2.2
3.1	0.37	2.9	1.39						3	0.608588	2.25	0.65						2.82	0.45	2.47	1.36						0.94	0.77	1.72	1.44						1.77	0.1	1.3	1.24						1.47	0.55	1.18	2.24
3.15	0.65	4.25	0.84						3.35	0.320336	1.66	0.69						2.09	1.36	2.26	1.61						1.15	0.79	2.03	0.79						1.26	1.91	2.35	0.66						0.92	1.51	1.58	1.09
2.16	0.78	3.47	1.16						2	1.61965	3.46	0.7						1.68	2.15	2.14	0.85						2.03	1.35	2.51	1.45						2.24	1.59	1.54	0.92						1.16	0.82	1.12	2.08
3.63	1.55	3.12	1.25						3.89	0.979461	3.5	0.82						2.48	0.49	1.98	0.53						1.66	1.05	2.83	1.12						1.62	0.58	2.35	0.76						1.59	0.9	1.79	0.92
3.08	0.19	2.7	1.81						1.6	1.65557	3.51	0.61						1.57	0.42	2.51	2.01						0.93	0.92	1.72	1.37						2.21	1.18	2.12	0.84						2.26	1.12	1.46	0.86
2.28	2.02	2.29	0.91						4.01	1.06089	2.03	0.74						2.65	1.04	1.27	1.19						2.6	0.45	1.76	1.86						2.81	1.72	2.06	0.74						1.32	1.23	1.79	1.18
3.2	1.44	3.61	1.47						2.95	0.433218	3.33	0.79						3.1	0.26	2.23	1.34						2.09	0.78	2.16	0.23						2.77	1.22	1.52	0.91						1.81	0.42	2.07	0.89
2.74	1.59	3.5	0.67						3.76	0.720038	1.83	0.47						2.18	1.15	1.52	1.33						2.3	1.17	1.62	1.29						1.64	0.39	1.89	0.68						1.22	2.3	1.26	1.39
2.65	1.86	2.13	0.77						1.49	1.70752	2.84	0.73						3.21	0.34	2.64	1.03						1.08	2.11	2.14	1.31						1.38	1.04	1.78	0.79						1.11	0.83	1.22	0.28
2.9	1.1	4.64	0.98						2.14	1.60279	2.93	1.22						2.56	1.12	1.77	1.35						2.04	0.8	2.32	0.98						2.71	1.01	2.52	0.78						1.7	0.96	1.77	0.88
3.17	1.08	2.18	0.81						2.85	0.547824	1.86	0.75						2.06	0.89	1.68	0.94						2.09	1.58	1.74	1.19						1.37	0.12	2.8	2.35						1.68	1.12	0.93	0.57
2.3	0.59	3.17	0.47						3.24	1.17434	2.8	1.3						1.44	0.35	2.17	0.9						1.79	0.67	2.19	0.96						2.61	1.05	1.75	1.41						1.15	1.33	0.89	1.11
1.6	0.78	5.07	0.39						4.55	1.71688	2.8	1.85						2.91	0.57	1.98	0.79						1.73	0.73	2.55	1.01						2.85	0.97	1.48	2.31						1.46	0.76	1.08	1.44
3.09	1.71	2.78	1.07						3.42	0.141543	2.01	1						3.1	0.88	1.93	0.97						1.72	1.19	2.09	1.12						1.88	0.3	2.21	0.79						1.26	1.97	1.29	0.92
2.76	1.56	1.97	0.77						2.2	1.27703	1.76	1.18						2	0.5	2.69	1.24						2.92	0.25	1.88	1.05						2.78	1	2.86	1.01						1.63	0.22	1.41	0.68
3.08	0.52	1.79	1.13						2.99	0.581709	4.22	0.58						2.27	1.65	1.45	0.98						1.34	1.57	1.52	0.88						2.48	1.6	1.92	0.79						1.58	0.38	0.94	0.73
2.03	0.29	3.28	1.32						3.2	0.202245	2.75	1.12						2.53	1.34	2.16	0.51						2.08	1.27	1.61	0.98						2.58	0.56	2.08	0.52						1.38	1.41	1.6	0.86
2.53	0.98	2.73	0.88						2.69	1.11787	3.55	0.85						2.08	0.85	3.03	0.79						1.29	0.95	1.89	0.82						2.36	0.73	2.81	0.99						1.2	1.8	1.29	0.92
4.56	0.74	2.97	1.16						2.18	1.2203	2.77	0.75						3.28	0.32	2.13	1.11						1.96	1.12	2.71	1.08						2.51	1.11	2.13	0.87						1.6	0.64	0.86	0.71
3.65	1.09	3.19	1.22						3.65	0.709618	2.21	0.97						2.13	1.3	1.7	1.21						2.57	0.9	1.88	1.15						1.63	0.44	1.77	2.12						2.45	0.85	1.29	0.89
1.43	1.07	4.18	0.84						2.99	1.23808	2.53	1.87						3.28	0.28	2.58	0.65						0.92	1	2.96	0.98						3.95	0.18	2.4	1.55						1.84	0.32	1.43	0.78
3.14	1.07	2.99	0.51						2.77	0.762341	2.07	1.61						1.86	1.07	2.3	0.93						2.54	1.53	2.97	0.6						4.72	0.47	2.17	2.48						2.05	1.21	1.41	1.44
3.68	2.31	2.27	1.05						1.46	0.178054	2.69	1.22						2.79	0.79	2.88	1.27						1.73	0.44	2.6	0.96						2.65	0.89	1.96	0.79						2.24	1.54	1.18	1.12
2.03	0.45	1.4	0.93						3.49	0.65183	3.08	1.23						3.15	1.1	2.46	1.01						1.66	0.57	2.24	0.95						2.24	1.2	1.9	0.73						1.4	0.41	1	0.35
3.04	0.54	3.58	0.84						2.32	1.60761	1.99	1.02						2.65	1.39	2.06	0.73						1.48	0.65	4.01	1.14						1.68	1.43	1.73	3.49						1.39	1.72	1.92	1.38
2.33	0.67	4.13	1.06						2.71	1.3445	2.41	0.79						1.64	0.09	2.24	0.93						2.2	0.95	1.94	1.41						3.31	0.6	2.7	0.7						1.97	0.41	1.59	0.63
1.92	1.87	3.43	1						3.04	0.811834	1.87	0.78						3.84	0.3	2.08	0.54						2.21	0.86	3.16	1.06						2.8	0.88	1.68	0.6						2.03	0.65	1.5	1.18
1.88	2.14	2.99	0.63						2.42	1.80825	2.43	1.26						3.18	1.05	2.65	0.88						1.71	0.16	2.85	0.84						1.89	0.23	3.13	1.11						1.75	0.97	1.17	0.45
2.31	0.4	3.89	0.75						4.33	0.980897	1.93	0.73						3.14	0.69	1.72	1.71						2.08	1.34	2.41	1.09						2.61	1.19	1.31	0.82						2.25	1.38	0.91	0.62
1.65	1.81	1.85	0.79						4.32	0.982611	2.4	1.12						2.75	0.8	2.41	0.75						2.1	1.51	1.52	1.26						3.45	0.43	2.13	0.71						1.52	0.44	0.78	0.79
3.11	1.07	2.79	1.11						2.47	1.3359	2.49	0.93						2.89	0.8	1.85	0.8						1.92	2.03	2.43	0.74						1.87	0.18	2.58	0.82						1.07	1.12	1.33	1.26
3.08	0.27	2.51	1.05						4.27	1.03548	2.58	0.73						2.66	0.99	2.31	0.89						2.16	1.08	1.58	1.72						1.79	0.1	1.96	2.57						0.97	0.79	1.21	1.12
3.46	0.76	2.52	1.09						3.49	0.246841	2.11	0.52						1.2	0.61	1.99	0.99						1.55	0.33	1.6	1.13						2.8	1.79	2.29	0.71						1.35	2.01	1.17	0.38
4.23	1.29	2.44	0.89						2.14	0.773385	2.53	1.28						1.76	1.95	2.32	0.86						1.9	0.38	1.88	1.06						2.08	1.25	2	0.48						2.1	0.82	6.62	0.71
3.02	0.37	2.18	0.49						2.73	0.224154	3.34	0.88						2.48	0.63	2.87	0.98						1.76	1.5	1.62	0.84						2.45	1.1	1.75	0.81						1.26	1.51	0.96	1.41
2.7	1.56	2.4	1.16						3.61	1.46087	4.6	1.13						1.72	1.27	1.62	0.76						2.82	1.21	2.1	0.65						2.53	1.02	1.71	0.76						1.54	0.7	1.54	1.09
3.99	0.8	2.27	1.25						2.58	1.11935	2.81	0.63						1.91	0.73	1.72	0.8						1.39	1.35	1.32	1.14						2.3	0.66	2.46	0.58						1.93	0.24	1.01	0.88
1.94	0.96	2.46	1.29						3.14	0.925462	3.08	0.72						1.32	1.4	1.94	0.68						2.22	1.51	1.89	1.07						1.77	1.05	2.93	1.69						1.39	2.06	0.94	0.84
3.5	0.96	3.56	0.8						2.22	0.931847	2.64	1.21						1.46	0.33	2.72	0.93						2.24	1.43	2.67	0.85						1.66	0.59	1.52	2.22						1.21	1.58	1.66	1.15
2.83	0.39	2.95	1.06						1.44	1.08675	1.99	0.77						2.3	1.59	2.08	0.72						1.38	0.23	2.79	0.85						3.24	0.97	1.98	1.44						1.22	0.96	1.43	1.77
2.03	1.17	2.37	0.53						1.58	2.4469	2.28	0.79						2.57	0.32	1.88	0.71						2.23	1.56	2.61	1.08						1.71	1.85	2.74	0.56						1.62	1.01	1.56	0.78
5.26	0.23	3.73	1.11						3.47	1.0361	2.14	3.04						1.65	2.49	1.92	0.94						1.4	0.13	2.49	0.91						2.57	0.3	2.32	0.53						1.89	1.22	4.48	2.68
3.94	1.26	2.98	0.73						2.43	1.04219	2.56	0.83						2.4	1.47	1.88	0.86						2.06	2.25	2.78	0.69						1.81	0.94	2.69	0.74						1.63	0.72	1.23	1.06
2.43	0.47	3.3	0.55						4.16	1.37938	2.7	1.37						1.69	1.74	2.01	0.81						2.03	1.16	2.1	0.51						1.57	1.19	2.46	0.94						1.61	0.58	1.44	1.13
3.24	1.34	4.48	0.77						4.03	1.53741	2.83	1.28						1.38	0.6	2.04	0.8						2.25	1.24	2.52	0.59						2.27	1.34	1.33	0.77						2.07	0.46	0.96	1.07
2.42	1.37	2.91	0.81						3.54	0.726133	2.45	0.94						1.49	1.14	1.78	0.95						1.68	0.11	2.08	1.06						2.64	0.54	1.2	0.86						1.26	0.36	1.62	0.55
2.68	0.82	2.01	0.54						2.74	0.761636	3.3	0.68						2.48	0.76	2.32	0.88						2.39	1.68	1.65	1.52						2.07	1.49	2.19	0.61						2.15	1.43	1.89	0.53
4.03	1.3	2.34	0.18						1.34	1.40866	3.1	1.18						1.82	1.54	2.59	1.05						1.53	0.65	1.52	0.69						1.77	0.89	1.69	1.44						1.57	0.58	1.75	0.68
3.32	1.8	4	0.76						2.1	1.12451	1.98	0.95						2.53	0.28	1.49	0.76						2.88	0.99	1.53	0.77						1.77	1.64	1.48	1.26						1.57	0.51	1.27	1.06
2.64	0.47	1.93	0.52						3.28	1.10559	2.65	1.06						2.41	1.56	3.01	1.17						1.08	1	5.33	0.67						2.31	0.76	1.87	1.18						1.38	1.07	1.2	0.41
2.95	0.21	1.96	0.73						2.68	0.896796	3.85	0.84						1.7	0.98	1.91	1.05						1.76	0.21	1.1	0.65						1.33	1.76	1.89	1.59						2.01	1.63	1.37	1.33
2.81	0.48	3.65	0.84						4.09	1.21857	2.07	1.55						2.81	0.58	1.33	0.82						2.56	1.49	2.02	0.86						2.56	1.21	1.82	1.07						1.26	1.62	1.61	1.18
2.66	0.85	2.02	1.8						2.16	1.90459	3.68	0.88						3.72	1.22	1.7	0.66						1.33	1.05	1.86	0.77						2.46	1.8	2.43	0.6						1.3	1.69	1.7	1
2.88	0.5	3.41	0.88						2.77	0.890599	3.38	0.93						1.52	0.21	1.84	1.48						1.61	1.14	1.93	1.35						1.23	0.83	1.45	0.75						1.21	1.08	0.81	1.55
3	0.34	3.75	1.38						1.68	0.273911	3.05	0.74						2.03	1.59	2.35	0.87						2.06	1.68	2.34	0.86						2.22	1.45	1.76	1.83						1.59	0.67	1.08	0.84
3.08	0.37	3.53	1.24						2.64	1.36101	2.76	1.27						2.63	1.13	3.08	0.75						1.83	0.22	2.21	1.04						1.81	0.19	1.59	1.11						1.62	0.13	1.18	0.51
2.3	2.03	2.37	0.97						2.86	0.223185	1.63	1.13						2.64	1.36	2.73	1.05						2.35	1.38	2.04	0.88						2.09	1.23	2.17	0.65						1.64	0.19	1.06	0.9
1.99	1.42	2.53	1.13						2.9	0.319168	2	0.32						3.33	0.26	2.98	1.14						2.38	1.13	1.17	1.28						1.94	0.56	1.74	0.79						1.33	0.65	1.51	0.65
2.66	0.52	2.24	1.24						3.06	0.985051	2.14	0.83						3.46	0.87	2.12	0.45						1.48	1.96	2.75	1.09						2.51	1.03	2.35	1.45						1.38	1.74	1.59	0.66
3.82	1.82	4.61	0.91						2.71	0.412498	4.53	0.63						1.95	1.59	1.14	0.8						1.95	0.76	3.13	1.33						1.92	1.18	1.78	0.86						1.43	1.45	1.64	0.8
3.72	0.49	2.72	1.05						4.7	1.11712	2.4	1.2						1.75	0.21	1.5	0.46						2.32	1.56	2.35	1.19						2.43	0.93	1.75	0.81						1.55	0.36	1.1	1.15
3.61	2.11	3.51	1.05						4.17	1.12722	2.28	1.25						2.39	1.39	2.87	0.97						2.38	1.34	1.8	0.73						2.66	1.8	2.31	0.71						0.9	0.09	0.94	0.89
4.04	1.88	2.93	1.07						2.42	1.78704	3.07	1.32						1.74	0.72	1.36	0.3						1.85	0.2	1.44	0.43						2.15	1.63	1.84	0.49						1.28	0.82	1.53	1.17
5.44	0.51	3.55	1.03						4.4	1.13608	2.01	0.9						2.57	1.26	3.52	0.95						2.03	1.31	1.75	1.02						2.93	0.97	2.09	1.52						1.73	1.73	1.47	1.47
2	1.24	2.93	1.55						2.3	1.29563	2.64	1.14						2.02	1.19	2.72	0.96						1.42	0.86	1.68	0.77						5.61	1.04	2.17	0.65						1.24	0.63	1.67	0.96
5.23	1.02	3.34	0.9						2.44	1.24531	2.87	0.65						1.78	0.43	2.84	1.24						2.21	0.86	2.73	1.18						3.41	0.68	1.83	0.73						1.03	1	1.54	0.95
3.45	0.54	2.72	1.16						2.3	1.45354	2.26	0.97						3.5	0.9	3.51	0.68						1.36	1.89	2.17	0.9						2.1	1.26	2.17	0.99						1.88	1.2	1	0.64
4.48	1.44	3.25	0.94						3.55	1.22889	2.17	0.85						2.5	0.8	2.73	0.8						2.88	0.76	1.8	1.67						2.02	1.66	2.43	1.06						1.02	1.13	1.39	2.25
2.37	1.28	4.32	0.94						2.37	0.605014	2.89	0.94						2.36	1.75	1.78	0.98						2.27	1.5	2.12	0.86						2.78	1.01	2.38	1.07						1.2	0.88	1.17	0.77
2.18	1.63	4.35	0.96						3.9	0.169724	2.44	1.82						2.23	0.34	1.41	1.37						2.28	1.3	1.89	0.6						1.66	1.53	1.56	2.45						1.33	1.71	1.82	1.13
2.64	1.9	4.55	0.63						3.17	0.960847	2.7	1.12						2.93	1.08	2.65	1.25						1.53	0.29	2.45	0.62						1.82	0.8	1.71	0.77						1.01	1.32	0.91	0.4
2.36	0.68	3.15	1.43						5.2	1.50345	1.82	0.46						3.25	0.79	3.3	0.79						1.96	0.64	2.27	0.94						3.1	1	1.62	0.97						1.43	0.72	0.89	1.17
2.67	1.07	2.47	1.19						2.42	1.18134	2.43	0.71						2.33	1.21	1.85	0.61						2.61	2.29	1.54	1.24						1.88	1.04	2.34	0.51						1.2	0.88	1.71	1.17
3	0.6	4.48	1.03						2.72	1.14037	2.82	2.16						2.83	1.53	1.79	1.01						2.36	1.35	2.38	1.04						1.58	2.39	1.69	1.12						1.53	1.7	0.9	1.19
2.29	0.83	4.58	0.54						4.23	1.04103	2.32	1.25						3.33	0.88	2.55	1.08						2.39	1.46	2.84	1.51						2.02	0.21	1.63	1.17						2.04	1.23	0.96	0.96
2.76	0.29	3.52	0.44						3.04	1.26136	2.12	0.63						1.94	0.76	2.99	1.03						2.74	0.84	1.94	1.9						2.31	1.24	1.27	0.48						1.24	0.98	0.81	0.46
3.32	0.39	3.08	1.19						2.98	0.413309	2.28	0.68						2.83	0.81	2.31	1.12						2.2	1.57	2.05	1.73						1.33	0.95	2.25	0.78						2.08	1.55	1.49	1.39
2.76	0.36	3.33	1.3						3.04	1.08583	2.5	1.32						2.61	1.56	2.26	0.81						2.39	1	2.18	0.71						2.85	1.43	1.63	0.69						1.1	0.31	1.61	1.08
4.62	1.5	2.73	0.41						2.7	3.19494	1.84	0.59						2.96	0.8	1.54	1.36						1.75	0.09	2.26	0.84						3.47	1.5	1.4	2.24						1.08	1.13	1.29	0.55
4.07	0.77	4.76	0.79						1.85	1.26317	4.45	0.6						2.15	0.61	2.71	1.16						1.58	1.06	2.04	1.65						2.29	1.16	1.85	0.69						1.45	1.81	1.4	0.75
1.91	1.36	3.12	0.59						1.64	1.51773	2.64	0.82						2.36	1.45	1.74	1.43						1.26	0.99	3.13	1.16						2.69	0.93	2.88	1.78						1.35	0.45	1.28	1.33
3.73	1.71	3.65	0.5						2.04	0.844632	1.6	0.62						4.26	0.28	1.32	0.55						4.34	1.1	3.09	0.73						2.69	0.69	2.12	0.81						1	0.55	1.18	0.78
2.27	1.1	2.26	0.92						2.98	1.4142	3.46	0.9						3.08	1.16	1.44	1.89						2.32	1.67	1.15	0.92						1.9	1.69	2.14	0.54						3.56	0.82	0.93	1.59
3.06	0.27	2.3	0.65						3.21	2.21807	2.71	1.13						1.58	0.58	1.39	0.99						1.76	1.03	2.29	0.8						1.47	1.03	1.94	0.77						1.38	0.39	1.43	1.38
4.14	1.21	4.74	1.14						2.69	1.88561	2.75	1.12						2.15	1.34	2.58	1.06						3.51	0.91	3.8	1.08						2.02	0.91	1.8	1.49						1.97	1.77	0.96	0.53
2.39	1.2	2.86	1.06						2.57	0.335278	4.75	0.98						2.67	0.54	1.48	1.24						1.87	0.53	1.87	0.86						1.32	6.36	1.98	1.51						1.17	2	1.43	0.94
2.78	1.16	2.25	0.72						2.11	1.5271	2.27	1.03						2.71	1.21	1.47	1.72						1.69	0.35	3.16	1.32						2.55	1.17	1.88	1.05						1.54	1.2	1.15	1.13
2.71	0.5	3.9	1.24						2.37	0.872036	3.67	1.57						2.93	0.76	1.99	1.22						1.76	1.07	4.07	0.97						2.25	0.3	1.76	0.76						1.35	1.2	1.13	0.79
1.66	0.57	3.29	0.61						2.65	1.86093	2.54	0.84						2.39	1.17	1.07	0.69						2.82	1.05	1.8	0.97						1.23	0.82	2.14	0.66						1.88	1.47	2.41	0.89
2.12	1.96	4.03	0.55						3.19	0.277402	3.78	0.85						1.44	1.29	1.96	0.68						1.45	1.13	2.91	0.68						1.24	0.96	2.07	0.52						1.17	0.83	1.07	1.22
2.05	0.52	3.88	0.77						3.65	1.47928	3.06	1.15						2.82	0.51	2.38	0.96						2.4	2.3	2.15	1.06						1.57	0.67	2.26	0.61						2	0.43	0.79	0.84
1.88	0.84	4.52	0.68						3.07	0.699914	2.02	0.85						1.23	0.19	1.58	1.09						1.11	0.37	2.07	2.43						1.59	1.26	3.64	0.56						1.63	0.22	1.19	0.7
3.02	1.53	3.1	1.79						2.57	0.238747	4.06	0.69						1.88	0.59	1.96	0.99						1.75	1.75	1.7	0.93						2.32	0.99	1.6	1.57						2.03	0.8	1.57	0.51
2.63	0.2	2.29	1.02						2.25	1.06432	2.96	0.92						1.62	1.42	2.07	1.28						1.22	0.9	2.19	1.12						1.36	1.32	2.19	1.07						1.45	2.61	0.98	0.73
2.48	0.71	4.56	0.95						4.39	1.54743	1.65	0.71						1.68	1.61	3.6	1.34						1.08	0.68	1.09	0.53						1.7	1.97	2.37	1.09						1.73	1.31	1.46	0.96
1.99	0.61	3.6	0.77						3.09	0.130321	3.86	0.83						2.74	0.21	2.58	0.98						1.9	1.39	2.8	1.03						2.65	0.11	2	1.43						1.51	0.9	1.71	0.43
2.15	1.19	2.03	1.78						2.77	0.392097	2.11	0.86						2.43	1.23	4.28	0.99						1.46	1.43	1.6	1.41						1.2	1.42	2.38	0.4						1.63	0.21	1.09	0.49
2.22	0.76	3.44	0.91						1.89	1.81264	2.43	0.9						2.12	1.57	2.07	0.95						2.33	1.18	1.47	0.99						1.21	0.33	1.4	0.38						1.42	0.25	1.37	1.76
2.3	0.21	3.25	0.66						2.21	1.13716	3.33	1.03						2.29	1.62	1.51	1.28						1.99	1.7	1.84	1.3						1.1	0.53	2.66	0.68						1.53	1.57	1.06	1.11
3.55	1.66	2.39	1.72						3.09	1.12912	3.11	1.07						1.46	0.51	3.14	1.08						1.78	1.44	2.38	1.11						1.22	0.88	1.71	0.6						1.29	1.33	1.53	0.82
3.2	0.56	2.63	1.06						2.55	0.97542	2.62	0.79						3.09	0.28	2.4	0.97						1.82	1.55	1.55	1.21						2.22	1.18	2.79	0.67						1.68	0.37	0.94	1.35
1.89	1.12	1.66	0.77						2.66	0.216657	2.02	0.98						2.15	1.11	1.68	0.9						2.77	0.85	2.55	1.03						1.13	0.14	2.06	0.59						1.27	1.12	1.27	0.19
2.86	0.36	3.15	0.83						3.03	0.140573	2.68	0.95						2.36	1.07	2.38	1.02						1.67	1.02	2.52	0.86						2.01	1.36	2.83	1.12						1.15	1.19	1.43	1.05
2.04	0.9	2.24	0.99						2.73	0.543384	2.56	0.88						4.19	1.56	1.14	1.69						1.82	1.18	3.9	1.02						1.17	2.33	2.13	0.82						1.22	1.61	0.85	0.99
3.32	1.54	3.56	1.08						5.66	1.53212	3.23	0.75						2.62	1.41	2.92	0.91						1.53	0.11	1.64	1.01						1.6	1.02	1.38	0.42						1.23	1.07	1.05	1.15
2.72	0.26	3.71	0.69						3.8	0.843702	2.23	1.47						2.1	2.3	1.55	1.33						2.04	1.38	2.62	0.86						1.37	0.15	2.37	0.81						1.92	0.97	1.3	1
3.44	0.97	2.29	1.13						3.07	0.858309	2.6	1.22						2.86	1.29	2.09	0.52						1.38	0.63	3.43	0.84						2.23	1.05	3.51	1.27						1.65	0.13	1.06	1.52
4.53	1.07	4.66	0.73						2.11	1.28668	1.93	1.12						3.03	0.24	1.88	0.95						1.78	1.98	1.74	0.99						1.68	1.45	1.39	1.26						2.94	0.13	2.59	0.96
3.49	0.3	3.36	1.06						2.46	1.19973	2.98	0.99						2.91	0.41	3	1.59						2.76	0.6	1.91	0.69						1.45	0.37	1.87	2.59						1.47	1.01	1.14	0.88
4.05	1.41	3.53	0.78						3.43	0.679196	1.59	1.7						1.7	1.9	2.12	0.91						1.9	1.23	1.65	1.3						2.51	0.61	1.54	0.65						0.94	0.46	0.84	1.34
3.5	1.18	2.71	1.02						2.33	0.934803	3.14	1.24						2.45	1.08	2.55	1.14						1.42	0.88	1.86	1.13						1.79	1.67	2.02	0.7						1.09	0.73	1.1	0.53
3.17	0.66	1.52	0.74						2.25	1.65677	2.59	0.97						2.11	1.55	2.41	0.7						1.44	0.42	1.85	1.81						2.48	0.63	3.13	0.92						1.16	1.91	0.96	1.13
3.84	1.33	2.57	1.4						3.61	1.19328	3.22	0.98						2.33	1.51	2.78	1.1						1.72	0.71	2.9	1.07						1.39	1.12	1.4	0.84						1.07	0.97	1.6	1.01
2.05	1.76	3.28	1.68						3.64	0.293537	2.22	0.69						2.53	2.29	2.45	1.11						1.9	0.56	2.59	1.76						2.26	1.4	1.34	1.64						1.29	1.67	1.76	1.36
3.72	1.15	2.44	1.01						3.82	0.818765	2.91	0.72						3.16	1.43	2.87	1.17						1.54	0.57	2.26	1.12						2.69	1.06	2.3	0.74						1.96	0.85	1.15	0.58
3.13	1.48	3.26	0.74						3.68	1.02623	2.25	1.16						2.93	1.69	1.91	0.87						1.63	1.5	2.45	0.66						1.27	0.89	1.52	0.94						1.88	1.64	1.35	0.28
4.19	1.47	2.91	1.59						3.25	0.164908	1.82	1.21						3.33	0.19	2.44	0.89						2.15	1.77	2.41	1.01						2.14	1.43	2.57	0.79						1.33	0.66	1.11	0.65
3.2	0.3	2.24	0.56						3.27	0.504715	3.12	0.95						4.13	1.25	1.54	1.34						1.67	0.43	1.7	1.19						1.35	0.53	2	0.91						1.36	1.22	1.64	0.94
1.82	0.55	3.46	0.73						3.01	1.17674	2.24	1.01						2.17	2.19	1.45	0.36						2.28	1.72	1.31	1.57						2.58	1.26	1.32	0.6						2.42	0.88	0.85	0.52
3.73	1.33	3.01	0.48						3.18	0.637886	2.37	1.57						1.98	0.91	3.1	1.07						1.9	1.08	2.38	0.8						1.88	0.66	2.01	0.48						1.14	0.47	1.26	1.21
3.56	1.71	3.12	1.8						3	0.332786	2.61	1.13						2.67	1.2	2.05	0.88						1.72	0.17	2.39	0.85						2.45	2.08	1.23	1.35						1.15	1.27	1.34	1.05
3.2	0.75	3.88	1.33						2.87	0.703383	1.81	0.71						1.74	0.12	2.93	0.81						1.41	0.62	2.29	1						2.43	1.03	1.71	1.83						1.71	1	1.64	1.24
3.99	1.56	4.1	1.54						1.94	1.73295	1.9	0.71						2.06	0.25	2.23	0.7						1.78	0.75	2.45	0.8						3.76	0.59	1.58	1.45						1.61	0.68	1.24	2.17
3.2	0.26	2.42	0.6						3.98	1.05739	1.69	0.59						2.88	0.58	2.7	1.18						1.44	0.2	2.24	0.88						2.3	1.38	1.78	0.72						0.86	0.62	2.01	1.16
5.58	1.2	3.49	1.8						2.43	1.03121	1.76	0.56						2.77	0.88	1.22	0.93						1.5	0.12	1.2	0.77						3.25	0.24	1.8	1.42						1.6	0.85	1.14	0.78
3.6	1.27	3.82	0.71						2.45	1.09116	2.18	2.31						2.49	1.37	2.39	1.19						1.37	0.66	1.87	1.11						2.21	1.19	2.99	0.94						1.13	0.78	1.04	0.85
2.72	0.27	3.11	0.9						2.25	0.141688	3.89	0.85						2.91	0.5	1.6	1.21						1.93	0.36	2.02	1.1						3.55	1.32	1.65	1.93						1.52	0.8	1.47	0.87
3.57	0.95	4.12	0.83						2.58	0.378779	2.49	0.77						4.52	1.23	3.06	1.12						1.53	0.4	1.4	0.84						1.55	0.29	1.83	1.67						1.83	1.85	1.33	1.61
3.55	0.49	4	1.09						1.59	2.6943	1.84	0.98						3.2	0.14	3.53	1.05						1.35	1.02	2.14	0.91						1.5	1.21	1.84	1.39						1.29	0.93	1.35	1.22
7.85	0.31	2.83	1.37						1.59	2.14066	2.65	0.79						2.46	2.45	4.54	0.78						2.05	1.6	2.7	0.7						2.31	0.6	1.96	1.34						1.33	1.12	1.1	0.97
1.77	0.94	3	3.42						3.27	1.2781	3.37	1.48						2.88	1.04	1.74	1.2						2.92	1.19	2.86	0.76						1.29	1.27	1.88	0.93						1.19	0.69	2.02	0.89
3.73	1.34	4.62	1.04						2.09	1.21823	2.34	0.99						2.72	1.91	2.4	1.36						2.19	1.66	2.17	0.66						1.43	1.26	1.72	0.62						1.21	2.03	1.55	0.69
3.72	0.95	4.08	1.02						3.08	1.26431	2.53	1.07						2.92	1.4	1.49	0.78						1.54	0.28	2.31	0.7						2.27	0.8	1.6	0.7						1.97	1.49	1.6	0.79
3.01	0.26	2.63	1.48						4.53	7.72258	2.23	1.32						4.22	0.99	3.46	0.92						1.76	0.65	1.6	1.17						1.68	1.19	2.7	0.06						1.48	0.65	0.92	0.57
3.42	1.98	3.66	1.02						3.82	1.18889	2.3	1.05						3.08	1.08	1.51	0.62						2.44	1.15	2.68	0.83						2.14	1.34	2.7	0.86						0.89	1.2	1.05	0.84
2.57	0.43	3.01	1.5						2.77	1.305	2.49	0.98						1.88	1.25	1.43	0.83						2.29	1.28	1.82	0.41						2.32	1.44	2.17	1.43						1.2	1.1	1.5	0.7
3.28	0.35	5.36	0.95						2.14	0.323894	3.18	0.67						3.71	0.23	2.19	1.31						1.81	0.41	2.68	0.88						2.48	0.88	1.77	2.03						1.94	0.93	1.47	1.43
3.58	1.28	3.14	0.98						2.42	0.263979	2.67	1.23						2.12	1.9	1.78	0.43						1.03	1.12	1.91	0.72						4.17	0.11	1.69	0.95						1.2	1.57	1.32	1.44
2.34	1.58	3.36	0.38						1.95	1.35404	2.82	0.88						2.19	0.51	2.39	0.96						1.66	0.15	1.28	1.32						2.35	0.72	2.4	1.22						1.5	0.54	1.05	0.76
4.95	2.31	2.85	1.03						1.69	1.3938	2.05	1.12						2.21	1.03	1.29	0.75						1.75	1.39	1.6	1.02						2.42	1.31	2.53	1.14						1.62	0.39	1.23	0.24
4.56	1.43	4.23	0.9						2.51	0.652038	1.84	1.14						2.28	1.98	2.6	0.83						1.17	0.67	1.79	1.08						2.4	0.93	2.38	0.81						2.22	0.34	1.44	1.03
2.57	0.55	2.39	0.72						2.5	0.397308	3.27	0.67						2.73	1.17	2.58	1.02						1.65	1.44	1.48	1.09						1.81	0.35	1.79	0.57						1.35	0.81	1.31	1.48
2.87	0.23	3.03	0.65						1.79	1.43447	2.29	0.57						2.42	1.02	2.4	1.23						1.52	1.32	1.27	0.76						1.84	0.17	1.88	0.81						0.99	0.68	1.43	0.77
5.18	1.01	3.1	1.95						3.36	1.41987	2.88	1.04						2.24	1.91	1.38	0.46						2.12	1.21	1.65	1.42						2.18	0.22	2.53	0.99						1.06	0.73	0.83	0.98
3.7	1.13	2.61	0.97						4.53	1.07855	3.07	1.02						1.73	1.25	2.11	0.93						2.28	0.82	3.31	1.03						3.34	0.9	1.67	0.84						1.5	1	1.8	1.34
2.74	0.36	2.18	0.9						2.83	0.265886	2.48	0.98						2.1	1.17	2.37	0.94						3.37	0.57	1.96	0.98						2.99	0.96	2.27	0.54						1.18	1.46	1.41	0.89
1.97	1.25	2.81	1.48						4.5	1.39891	1.87	0.92						2.21	1.32	1.26	1.32						2.27	1.33	1.37	0.89						2.22	0.92	1.59	0.72						2.19	0.63	1.74	0.5
3.97	1.41	2.46	0.86						2.78	0.71944	2.7	0.67						1.87	1.15	2.98	1.03						1.32	0.9	2.6	1.39						1.27	0.84	2.21	1.17						1.35	1.91	1.49	2.87
3.05	0.88	2.17	0.86						2.01	1.06844	1.59	1.11						1.6	0.65	2.82	0.8						1.36	1.55	2.12	1.02						2.36	1.71	1.81	1.56						1.53	0.34	2.24	0.71
4.05	1.31	1.46	0.99						2.29	0.980087	2.61	0.85						1.95	1.01	1.96	0.59						2.19	1.04	1.29	1.39						1.61	0.94	2.44	0.68						1.99	0.58	1.62	1.21
4.28	1.73	1.95	1.13						2.88	0.245984	3.51	1.12						1.28	0.34	2.22	0.88						2.28	1.1	2.68	1.52						1.87	1.65	2.39	0.85						1.43	1.24	1.66	0.98
5.11	1.02	2.5	0.78						2.26	1.11278	2.81	0.93						2.62	1.77	2.84	0.87						2.34	0.76	1.11	1.35						2.08	0.83	1.72	2.65						1.14	1.65	1.48	1.03
2.27	0.96	1.53	1.05						2.28	1.71996	2.76	1.27						1.47	2.58	2.66	1.32						1.61	0.31	3.06	1.35						1.57	0.28	1.82	0.64						1.24	0.8	1.33	1.47
2.59	1.24	2.23	0.49						4.24	0.842745	4.7	0.9						2.47	1.04	1.5	0.83						2.69	0.95	1.63	1.23						0.91	0.13	2.1	0.79						0.92	0.73	1.83	1.04
[truncated: 18,821 more rows]
[truncated: 11 more columns]

## Sheet: Figure. 5B
Fig. 5B
RdnaA2 strain containg Psyn66-lacZ or Pcon-lacZ plasmid cultivated in M6 medium with various aTc concentration
aTc concentration : 2 ng·ml-1 aTc									aTc concentration : 5 ng·ml-1 aTc									aTc concentration : 8 ng·ml-1 aTc
original data									original data									original data
Psyn66-lacZ		Pcon-lacZ		Binned Cell volume (µm3)	Rel. DnaA activity (ksyn66-1)				Psyn66-lacZ		Pcon-lacZ		Binned Cell volume (µm3)	Rel. DnaA activity (ksyn66-1)				Psyn66-lacZ		Pcon-lacZ		Binned Cell volume (µm3)	Rel. DnaA activity (ksyn66-1)
Cell volume (µm3)	Rel. lacZ mRNA conc. lacZ mRNA FISH intensity per cell volume, normalized to populational average	Cell volume (µm3)	Rel. lacZ mRNA conc. lacZ mRNA FISH intensity per cell volume, normalized to populational average						Cell volume (µm3)	Rel. lacZ mRNA conc. lacZ mRNA FISH intensity per cell volume, normalized to populational average	Cell volume (µm3)	Rel. lacZ mRNA conc. lacZ mRNA FISH intensity per cell volume, normalized to populational average						Cell volume (µm3)	Rel. lacZ mRNA conc. lacZ mRNA FISH intensity per cell volume, normalized to populational average	Cell volume (µm3)	Rel. lacZ mRNA conc. lacZ mRNA FISH intensity per cell volume, normalized to populational average
					Mean	SEM	Smoothed datat							Mean	SEM	Smoothed datat							Mean	SEM	Smoothed datat
1.54	1.06	2.892	0.894233	1.2	3	0.246928	2.97715		2.52	1.29	2.37	1.05	1.3	1.82848	0.237192	1.74237		1.51	2.71	1.72	1.28	1.2	1.26	0.087975	1.2635
1.59	0.87	2.35589	0.895578	1.3	2.72	0.121287	2.86052		2.43	1.03	1.98	0.86	1.4	1.25019	0.0992553	1.36659		1.61	0.65	1.22	0.89	1.3	1.09	0.072104	1.0981
1.08	1.13	1.23734	0.684434	1.4	2.72	0.111521	2.69938		1.6	1.65	2.62	1.5	1.5	1.12555	0.110804	1.10828		1.24	1.67	1.86	1.17	1.4	1.02	0.05752	0.988177
1.41	1.04	2.40704	1.10577	1.5	2.74	0.121914	2.4983		2.01	0.31	2.36	1.22	1.6	0.864291	0.0243671	0.96497		1.45	0.98	1.76	1.03	1.5	0.92	0.025952	0.934403
1.49	0.94	1.78597	0.898407	1.6	2.28	0.073934	2.26288		1.47	1.85	1.99	1.04	1.7	0.968645	0.0414394	0.937904		1.37	1.88	2.07	0.89	1.6	0.97	0.028501	0.937143
1.09	0.16	2.33807	0.880487	1.7	2.06	0.116905	1.98246		1.6	1.81	1.42	1.16	1.8	1.09097	0.0620241	1.03208		2.37	0.44	3.47	0.71	1.7	1	0.023073	0.995194
2.58	0.16	1.87258	0.754651	1.8	1.56	0.049664	1.63449		1.97	0.75	2.26	1.11	1.9	1.16788	0.05274	1.20852		2.37	0.72	2.45	1.12	1.8	1.07	0.025837	1.11515
3.09	0.6	2.48039	1.18845	1.9	1.25	0.037811	1.32978		2.78	1.13	2.2	1.02	2	1.4185	0.053924	1.45419		1.96	1.61	1.52	0.77	1.9	1.31	0.036547	1.30769
1.67	1.24	2.264	1.07834	2	1.18	0.078977	1.13083		1.86	0.62	2.18	0.87	2.1	1.80531	0.101887	1.77016		1.8	0.5	1.87	1.41	2	1.55	0.051789	1.57005
2.02	1.31	1.96191	1.47992	2.1	0.95	0.017602	1.04332		1.96	0.9	2.37	1.18	2.2	2.10771	0.0986514	2.14294		1.59	1.55	2.18	0.95	2.1	1.85	0.05257	1.87893
1.61	1.09	2.25981	0.750046	2.2	1.08	0.03609	1.04844		1.69	0.79	2.57	1.09	2.3	2.53509	0.104594	2.50451		3.06	1.35	1.81	0.84	2.2	2.22	0.062341	2.19201
2.31	0.21	1.93184	0.798693	2.3	1.14	0.06357	1.11052		2.32	1.12	1.53	1.67	2.4	2.87937	0.125519	2.83551		2.05	3.06	2.52	1.32	2.3	2.52	0.071429	2.47443
2.12	2.54	2.54851	1.24546	2.4	1.22	0.063466	1.20693		1.2	3.42	3.05	1.03	2.5	3.08904	0.10697	3.17222		1.43	1.08	2.37	0.93	2.4	2.72	0.07277	2.70564
2.19	0.7	2.10039	1.24538	2.5	1.33	0.099462	1.33247		1.75	0.62	2.9	0.95	2.6	3.34739	0.112376	3.44781		1.58	0.96	3.31	1.09	2.5	2.81	0.071796	2.86115
1.67	1.01	2.07417	0.169256	2.6	1.44	0.054856	1.46806		1.8	2.15	2.15	1.3	2.7	3.68125	0.150115	3.52732		1.78	1.9	3.1	0.99	2.6	2.92	0.078745	2.9145
1.8	1.53	2.34358	0.987304	2.7	1.62	0.062956	1.60596		1.76	3.11	1.61	0.83	2.8	3.64485	0.166501	3.39733		1.67	0.89	1.25	0.48	2.7	2.92	0.07959	2.84673
1.75	1.55	2.08225	0.657282	2.8	1.83	0.071781	1.77167		1.54	1.78	1.92	0.89	2.9	2.87305	0.111836	3.1007		2.39	0.94	1.67	1.04	2.8	2.72	0.078044	2.6589
2.84	0.16	2.06854	1.14994	2.9	1.94	0.082469	1.96809		2.45	0.27	2.39	1.76	3	2.57796	0.105645	2.74681		2.08	0.3	2	0.87	2.9	2.41	0.082341	2.37521
1.66	1.45	2.23206	0.869056	3	2.08	0.089891	2.15421		2.84	0.22	2.21	1.54	3.1	2.49662	0.121096	2.41748		1.79	0.36	1.87	0.59	3	1.97	0.070986	2.04628
1.72	1.44	1.49048	1.03611	3.1	2.37	0.121051	2.35424		1.9	0.71	2.16	1.06	3.2	1.95332	0.122766	2.09039		1.66	0.69	1.72	0.55	3.1	1.68	0.06769	1.77884
1.42	0.26	1.3546	1.12131	3.2	2.82	0.306242	2.57396		3.21	1.84	3.47	0.93	3.3	1.75705	0.105103	1.76494		3.07	0.89	1.65	0.59	3.2	1.48	0.069944	1.55909
1.35	0.43	1.98748	1.45435	3.3	2.45	0.136448	2.81116		1.8	1.32	1.73	1.02	3.4	1.50253	0.10153	1.44524		2.78	1.33	1.8	1.35	3.3	1.32	0.059689	1.37778
2.2	0.93	1.87223	0.930846	3.4	3.21	0.184676	3.06351		1.81	2.03	3.38	1.06						1.92	0.18	2.92	1.02	3.4	1.29	0.066644	1.23818
1.45	0.64	1.74064	1.85476						1.76	1.15	2.12	1.24						2.19	0.94	2.2	1.12	3.5	1.16	0.110234	1.1439
2.04	2.25	1.32325	1.02447						3	0.9	1.92	1.25						2.8	1.32	2	1.23
1.56	0.17	2.1019	0.795295						2.5	0.28	2.21	0.87						1.64	1.43	2.27	0.97
1.23	0.29	1.96688	0.577248						2.39	0.69	2.36	1.17						2.8	1.33	3.41	1.17
1.43	0.62	2.13615	0.675287						2.45	0.36	2.59	1.24						2.35	0.3	2.6	0.86
1.89	1.2	2.13398	0.846357						3.68	0.93	1.74	0.85						1.67	0.84	1.8	1.27
1.88	1.61	2.033	0.98976						1.42	0.85	1.81	0.89						1.32	1.29	3.57	0.9
2.98	0.4	1.1988	1.31549						2.7	1.29	2.48	1.04						2.58	0.42	2.81	1.01
1.66	0.36	2.34655	0.750664						2.74	0.34	2.09	0.99						2	1.05	2.23	1.09
1.83	1.32	2.74824	1.03401						2.16	1.9	2.26	1.5						1.57	1.42	2.05	0.88
1.65	0.16	1.51636	0.58891						1.91	1.76	2.04	0.76						1.54	2.2	1.79	1.06
2.34	2.26	1.9927	1.15725						3.1	0.09	2.6	1.1						2.35	0.7	1.82	0.68
2.03	1.73	1.60106	1.51928						2.42	0.56	2.82	1.24						2.25	0.67	2.49	1.18
3.04	0.69	3.39715	0.969815						2.09	0.98	2.3	0.96						1.78	0.47	1.9	0.65
2.13	1.28	2.46569	0.585213						1.73	3.18	2.04	1.04						1.91	1.88	2.18	1.58
1.59	0.15	2.01136	0.956218						2.36	1.07	1.74	0.71						2.79	0.5	1.87	0.94
2.15	1.31	2.31035	0.872644						2.62	0.37	1.31	1.35						2.98	2.24	2.54	1.16
2.44	1.38	1.83309	1.59816						2.68	0.46	2.24	0.96						3.15	0.61	2.35	0.88
2.32	1.48	1.50858	1.19414						1.6	1.68	1.85	1.11						3.14	1.98	2.46	0.96
2.59	0.73	1.50331	0.995477						2.2	1.17	1.15	0.63						2.82	0.25	1.65	1.33
1.67	0.4	1.90892	1.39146						1.92	1.54	1.57	1.81						2.46	0.29	1.92	1.26
1.9	1.08	1.68207	1.79997						2.57	0.14	2.35	0.95						1.64	1.2	1.91	1.09
2	0.67	2.2763	0.758222						1.6	0.9	1.65	0.91						2.24	0.93	2.16	1.44
3.01	1.08	1.44157	1.70971						3.4	1.33	1.95	1.07						2.77	0.41	1.84	1.11
1.99	0.74	1.38572	1.23608						2.11	1.04	1.82	1.23						1.77	2.73	1.79	0.75
2.64	1.4	2.06574	0.97543						2.1	0.85	1.84	0.82						2.51	1.64	2.08	0.91
2.12	1.62	1.45314	1.54899						3.43	0.15	2.55	1.17						1.86	0.97	2.53	1.18
2.61	1.97	3.3383	1.14401						2.99	0.66	1.98	0.93						2.67	0.25	2.15	0.59
3.04	0.16	2.79848	1.11899						1.6	1.79	2.16	0.69						2.93	0.31	2.6	1.21
2.22	0.78	1.65576	0.628538						2.7	1.33	2.41	1.09						2.15	0.51	2.38	0.9
1.89	1.13	1.28718	0.643113						3.54	0.44	1.74	0.74						2.62	0.22	2.24	0.95
1.31	1.18	2.61196	1.19185						2.98	0.27	2.64	1.83						1.38	0.99	1.22	1.63
1.8	1.73	2.62116	1.11857						2.42	1.17	1.89	0.86						2.76	0.5	2.73	1.25
1.61	1.26	1.72639	0.67466						3.83	1.14	1.16	0.96						1.6	1.16	2.2	0.87
2.97	0.75	2.42747	1.01326						2.12	1.84	0.91	1.16						1.82	0.56	1.18	1.53
3.1	1.85	1.79848	1.60528						3.04	0.2	2.05	0.58						1.79	1.43	2.88	1.04
3.15	0.19	2.27879	0.8086						3.13	0.61	2.73	1.08						2.06	1.24	2.05	0.99
1.39	0.14	1.14482	0.717717						2.56	1.49	3.06	1.05						2.8	0.47	1.3	0.99
2.01	1.17	1.44289	1.50993						2.91	0.35	2.48	0.65						2.81	1.06	2.07	0.77
2.29	1.94	2.12253	0.995766						2.34	1.43	1.64	1.15						2.64	0.35	2.1	1.32
2.65	2.78	2.70605	1.19263						2	1.7	2.16	1.09						2.3	0.12	1.79	0.67
2.04	1.25	1.27871	0.846513						3.27	0.72	2.24	1.06						2.11	1.59	1.98	0.79
2	1.15	2.06356	1.06632						2.2	1.77	2.2	0.56						2.96	1.49	3.08	1
1.82	1.24	2.59058	0.678025						2.99	0.14	2.7	1.56						3.34	0.28	2.2	0.99
2.28	1.44	1.54454	0.64557						2.25	1.06	2.03	0.89						2.71	0.53	2.01	0.9
2.31	0.92	1.56816	0.865086						2.35	0.64	1.73	0.76						1.96	1.53	2.65	1.02
3.21	0.99	1.62852	1.15315						2.19	1.91	1.63	0.75						1.76	1.14	2.23	0.91
1.82	0.67	1.58381	1.21588						3.23	0.11	1.68	0.92						2.07	1.49	2.03	1.29
3.39	1.33	1.42634	0.939914						2.24	0.91	1.52	0.84						3.1	0.98	1.41	1.13
2.25	3.06	2.07903	1.18919						1.83	1.15	2.37	1.24						1.33	0.72	2	1.01
2.76	0.64	2.81464	0.891297						2.52	1.41	1.68	0.66						3.78	3	1.43	0.74
2.4	1.35	1.93933	1.02281						3.55	0.95	2.15	1.4						2.53	0.18	2.05	1.12
2.75	0.59	3.15569	1.05642						3.31	1.21	2.3	1.04						2.78	0.45	1.62	1.11
1.72	0.2	2.50899	1.17624						1.77	0.48	2.32	1.45						2.91	0.27	1.79	1.1
2.35	0.94	1.97149	1.00144						2.39	0.37	1.54	0.39						2.92	0.23	2.48	1.09
1.93	0.99	1.61428	2.09604						1.67	0.92	2.19	0.96						3.23	1.14	1.67	1.05
1.74	0.12	2.49631	0.693605						3.08	0.44	1.54	0.72						1.99	1.68	1.47	0.91
1.98	1.15	1.98136	0.614926						2.92	0.15	2.42	1.19						5.44	0.28	2.66	1.31
2.33	0.97	1.67032	2.01908						2.21	1.21	2.84	0.86						2.23	0.69	2.06	1
1.85	1.73	1.8816	1.04009						4.05	1.59	2.3	1.02						3.98	2.19	1.38	1.13
2.51	1.19	2.30833	1.16894						1.9	0.64	2.23	0.91						2.32	2.88	2.1	0.9
2.21	1	1.9447	1.70954						2.57	1.07	1.86	1.36						1.54	0.78	2.46	1.08
3.78	0.2	2.19299	1.03793						3.34	1.02	1.91	1.55						1.41	1.03	1.44	0.61
2.16	1.47	1.81772	0.822913						2.74	1.35	2.58	1.28						1.22	1.23	2.45	1.26
1.79	0.98	1.63212	2.11037						1.96	0.18	3.02	0.77						2.97	1.96	2.29	1.35
2.27	1.16	1.98125	0.708493						2.99	0.86	1.67	0.97						2.47	0.77	2.04	1
2.79	1.53	2.14776	0.87363						2.67	1.33	2.38	1.16						2.67	1.67	2.03	0.98
2.37	1.51	2.14236	1.02947						1.68	2.05	2.16	0.85						3.3	1.25	1.89	1.37
1.78	0.98	2.05154	0.854027						1.79	1.16	3.22	0.94						1.91	0.81	2.5	0.68
1.93	0.82	1.18862	0.992326						2.06	0.21	2.31	1.33						1.45	1.39	2	0.94
2.53	1.3	2.03201	0.706193						1.79	1.24	1.54	1.11						1.6	2.46	2.54	1
2.09	1.17	1.77223	1.40709						2.32	0.21	2.81	1.23						1.87	0.88	2.48	1.08
2.14	0.97	2.17783	0.912007						2.19	1.32	1.97	1.17						2.4	0.75	1.93	0.58
1.33	1.26	2.22562	1.04834						2.51	0.39	2.31	1.08						2.15	0.27	2.2	1.22
1.34	1.34	1.34252	1.21029						1.88	1.13	1.8	0.9						1.59	2.22	1.57	1.09
2.24	0.74	1.2387	1.18502						1.94	2.05	1.52	1.02						1.45	2.66	2.4	1.78
2.07	0.22	1.61607	1.16383						2.71	0.82	2.51	1.02						2.22	0.21	1.51	1.06
1.79	1.24	1.56491	1.94965						2.34	0.75	3.12	1.46						1.83	1.53	2.63	1.26
1.78	0.72	2.07263	0.846548						1.92	1.76	2.2	1.02						2.1	0.46	2.92	1.34
2.37	0.73	1.46112	1.07056						1.95	0.88	2.93	0.89						1.87	2.66	1.65	0.79
1.93	1.66	1.8469	0.833175						1.58	0.71	2.61	1.48						2.59	0.56	2.87	1.44
1.3	0.24	2.24664	0.86347						1.9	2.01	2.23	0.79						2.39	0.7	2.66	1.04
1.8	1.18	1.6386	0.388797						1.52	0.88	2.52	1.12						1.53	2.41	1.89	1.01
1.39	1.63	2.15426	1.0024						1.69	1.43	2.21	0.97						1.44	1.1	2.07	0.85
1.61	2.19	1.73513	1.82003						1.8	1.21	2.79	1.01						1.95	0.22	1.92	0.62
2.18	1.07	2.04133	0.559152						2.66	0.42	1.42	0.99						3.28	0.89	1.9	0.96
2.28	1.36	1.53723	1.30262						3.16	1.01	1.7	0.84						2.87	1.44	1.6	1.14
2.1	0.73	1.46685	1.01126						1.32	0.43	2.21	1.16						2.01	2.33	1.75	1.06
1.36	0.38	1.62595	0.80222						1.75	0.8	2.24	1.43						3.01	0.98	2.49	0.96
1.71	1.62	2.12596	0.970526						2.14	1.78	1.55	1.15						1.73	1.86	2.12	1.28
2.15	1.25	2.04189	1.29666						2.6	0.11	1.97	1.33						1.93	1.26	2.3	0.97
2.75	0.31	1.9872	1.06414						2.38	0.28	4.95	0.89						1.87	1.33	1.47	1.84
1.7	0.49	1.88948	0.849721						2.56	1.03	2.4	1.07						3.1	1.26	1.93	0.75
1.11	0.25	2.18278	1.02841						2.68	0.53	3.38	1.03						2.08	2.19	1.34	1.68
1.8	1.51	2.06757	1.14095						1.84	1.66	1.97	0.53						3.21	1.18	2.17	1.11
1.79	0.99	1.96853	1.25529						1.74	1.52	2.23	0.82						1.93	1.58	2.76	1.08
1.3	0.21	1.63861	1.38386						1.53	0.74	2.56	1.68						2.58	0.49	1.95	1.55
2.33	0.65	2.26996	0.853494						2.04	1.16	3.26	0.75						2.09	1.92	3.32	0.75
1.77	1.46	1.88951	1.38599						2.21	1.33	1.39	0.62						2.6	0.31	2.72	0.97
2.24	1.37	2.60129	1.18162						2.65	0.21	2.43	0.97						1.6	0.61	2.19	0.8
1.45	1.52	1.72174	1.40651						3.13	0.24	2.48	1.25						3.02	1.03	1.84	0.34
1.36	1.24	1.68368	0.96603						2.44	0.46	1.29	1.76						1.54	1.03	2.3	0.66
2.48	1.64	1.50573	1.7007						2.42	1.79	2.68	1.73						2.3	0.76	2.14	0.77
1.81	1.4	1.21953	0.696892						3.16	0.75	2.84	0.83						2.45	0.58	1.57	0.67
2.15	0.97	1.64542	0.850822						2.18	0.47	2.01	0.99						3.91	1.86	2.36	1.09
1.98	1.35	1.82537	0.64603						2.55	0.63	2.47	1.51						2.31	0.64	2.57	1.87
1.5	1.03	2.21091	1.69254						2.04	2.09	2.25	1.42						2.74	0.31	2.87	1.23
1.81	1.39	2.15854	1.31102						3.04	0.18	1.77	1.14						2.67	0.32	2.59	0.74
2.34	1.04	1.72266	0.949736						3.67	1.05	2.33	1.24						3.83	1.09	2.06	0.96
2.3	1.48	1.43978	0.798633						3.22	1.2	1.69	0.61						1.57	1.17	2.57	1.15
1.83	1.23	1.71544	0.548475						2.06	1.16	2.12	1.24						2.27	0.93	2.77	1.06
1.64	1.74	1.45729	0.906102						1.86	1.41	1.48	1.15						1.93	1.12	1.41	0.71
1.43	0.75	2.25999	0.768167						3.06	0.68	2.93	1.09						1.97	0.73	1.77	1.22
2.21	1.06	2.34305	1.15854						1.63	0.45	1.56	0.84						2.18	2.17	2.58	1.54
2.55	1.15	3.09106	0.930222						3.34	0.56	1.88	0.68						2.43	0.66	2.22	0.9
1.52	0.3	1.73631	1.13915						2.11	1	2.38	0.77						1.67	0.53	1.93	1.11
2.22	2.21	2.25659	0.756662						2.66	0.51	1.78	0.67						2.16	0.37	1.65	0.66
1.78	1.29	1.90583	0.812694						2.21	0.94	1.86	1.05						2.19	0.8	2.29	1.44
2.27	1.13	2.62773	0.658948						2.96	0.61	2.36	1.05						2.28	0.44	2.87	0.99
1.66	0.5	1.61953	0.903775						3.31	1.48	2.26	0.79						2.6	0.43	2.51	1.56
2.29	1.43	1.811	1.28816						2.82	0.18	1.86	0.92						2.65	0.54	2.4	0.97
1.35	1.35	1.53011	1.40756						3.33	0.34	1.81	0.82						1.43	0.17	2.8	1.02
2.04	0.57	2.57977	0.544581						1.78	0.7	2.1	0.86						1.79	0.7	1.96	1.59
2.65	1.29	1.67602	0.938739						1.81	0.74	2.05	0.68						2.16	3	2.76	1.13
2.93	0.49	1.86711	1.07431						3.06	0.21	3.06	1.24						1.48	1.34	2.14	1.32
3.04	1.61	2.52441	0.758581						1.99	1.74	2.09	1.64						2.05	0.59	2.4	1.37
3.3	1.18	2.71489	0.982684						3.51	1.02	1.99	0.91						1.93	1.59	2.32	0.8
1.58	0.12	2.49206	1.1864						1.44	0.72	3.15	0.97						1.64	1.98	2	0.85
2.99	0.97	1.66415	0.747994						3.12	0.36	1.51	1.4						1.54	0.75	1.62	1.1
3.39	0.28	2.91106	0.373962						3.48	1.35	2.4	0.88						2.27	0.62	1.45	1.27
2.17	1.28	2.61512	1.03645						2.07	1.16	1.77	1.34						3.26	0.78	1.39	1.06
2.07	1.28	1.89565	0.57528						3.64	1.12	2.02	0.89						2.3	1.06	1.36	1.59
2.93	0.96	2.24156	1.21672						2.12	1.09	2.02	1.43						2.21	0.97	2.21	1.47
2.92	1.45	1.84887	0.949782						2.49	0.78	1.62	1.47						1.98	1.64	2.63	1.2
1.98	0.91	2.56109	1.53787						1.53	1.84	1.61	0.87						2.07	1.14	1.45	1.25
3.32	0.5	2.28246	1.14712						1.35	0.65	1.54	1.73						1.96	1.74	1.92	0.91
2.62	0.93	2.7793	1.11131						1.98	0.98	2.4	1.04						2.72	0.21	1.52	0.74
1.69	0.19	2.29136	0.485092						2.09	0.61	1.71	0.56						2.31	1.03	3.28	0.82
2.84	1.21	2.09424	0.615716						3.03	0.9	1.43	1.36						1.79	1.76	1.81	0.95
1.3	1.7	2.35507	0.684386						2.92	1.23	1.92	1.24						2.92	1.33	1.66	0.62
3.07	0.54	2.07721	1.03104						0.91	1.15	1.93	1.01						3.16	1.45	2.27	0.81
1.6	0.65	2.2428	0.719019						1.34	1.32	2.25	1.1						2.24	0.92	1.49	0.93
3.46	0.45	2.22002	1.00296						1.93	1.09	1.74	1.61						1.98	0.85	3.55	1.17
2.95	0.84	2.05282	1.03492						1.52	1.59	2.53	1.69						1.84	1.79	2.69	1.18
2.22	1.16	1.5227	1.10043						2.82	0.98	1.59	0.68						3.48	1.06	2.04	0.86
3.52	1.38	1.63666	1.12647						3	0.48	1.21	0.47						4.24	0.81	2.11	0.87
1.92	1.02	1.42061	0.768177						1.95	0.25	1.71	0.81						2.37	1.28	1.44	1.17
2.72	1.36	2.25295	1.11014						1.73	0.81	1.69	0.68						3.56	1.08	2.04	0.99
2.78	1.49	2.34702	1.7635						1.99	0.96	2.67	1.59						3.08	1.21	1.93	1.1
2.74	1.48	2.24155	1.30466						2.51	0.23	2.52	1.3						3.04	0.61	1.81	0.57
2.5	1.08	3.04458	0.985777						2.38	0.27	1.85	1.32						2.94	0.39	2.11	1.04
2.37	1.46	2.78347	1.03082						1.54	2.17	2.91	0.77						3.45	0.48	2.69	1.07
2.4	0.95	1.38588	0.673462						3.33	1.99	1.13	0.77						2.23	1.76	1.62	1.28
2.87	0.56	1.68037	0.743869						1.63	3.09	2.57	0.66						2.69	0.26	1.36	0.68
1.65	0.87	2.82121	1.10003						2.37	1.45	2.02	1.05						3.04	0.55	1.99	0.9
2.76	0.82	2.62366	0.796437						1.57	1.19	1.67	1.1						2.64	1.63	2.3	1.43
2.24	1.26	2.30327	1.20758						2.27	0.88	1.43	1.04						3.31	0.74	2.85	1.08
2.52	1.48	2.07306	0.598157						3.28	0.97	1.7	1.26						3.28	0.57	1.95	0.64
2.29	1.52	1.91116	1.45701						2.01	1.33	2.39	0.91						3.32	0.23	1.75	1.14
3.14	0.73	1.5246	1.72775						2.49	0.06	2.48	1.19						1.94	1.9	2.33	1.1
1.88	1.65	2.11265	1.14428						1.81	0.97	2.2	0.74						2.81	0.38	1.53	0.99
3.21	0.85	2.99948	1.43441						2.92	1	1.83	0.97						1.75	1.61	1.48	1.37
1.94	1.29	1.76044	0.792696						2.85	0.24	2.18	0.71						1.34	1.1	2.14	1.21
1.6	1.14	1.69474	0.998948						2.25	0.23	2.92	1.2						1.83	1.26	1.76	0.99
1.97	0.86	1.64439	0.932516						1.29	0.18	1.75	1.45						3.07	0.78	1.84	1.08
1.57	1.01	2.82632	1.05041						2.23	1.47	2.11	0.79						1.58	1.62	3.56	0.7
1.89	1.34	1.83054	0.799483						3.17	0.51	1.83	1.39						1.57	0.77	2.44	0.78
2.61	0.32	2.48501	1.22077						1.7	0.73	2.25	1.22						2.07	0.74	1.34	1.37
1.68	1.71	2.2785	1.13109						2.92	1.42	1.44	0.89						1.27	1.53	1.66	1.03
2.26	1.45	1.94406	0.758569						1.47	0.98	2.02	0.85						1.87	0.15	2.26	0.7
2.02	2.16	1.74611	0.832397						3.44	1.07	2.31	0.94						1.64	1.39	2.3	1.22
2.12	1.5	1.7633	1.22392						2.93	0.28	2.23	1.3						2.09	1.06	2.24	0.96
2.47	0.92	1.93153	0.780556						1.89	0.92	1.84	1.06						2.19	0.22	1.54	0.71
1.93	1.18	1.48478	1.70733						2.5	0.39	1.65	0.86						1.34	1.34	2.24	1.21
1.8	0.51	2.16355	1.1361						2.79	0.64	1.89	0.93						1.42	0.83	1.73	1.22
1.53	0.67	2.90715	1.16243						3.15	0.14	5.52	1.25						1.36	2.02	1.32	0.96
1.72	0.95	1.82044	0.894894						1.97	2.17	2.34	1.24						1.47	3	2.7	0.74
2.03	0.8	1.8564	0.637663						2.41	1.49	3.33	0.93						1.55	1.3	2.17	1.2
1.21	1.58	2.69261	1.10327						2.98	0.19	2.15	1.19						2.68	1.5	2.03	0.91
1.96	0.96	2.05004	1.18873						2.48	1.09	2.25	1.35						2.48	0.91	2.46	1.18
1.09	1.04	1.73863	0.717993						2	2.16	2.2	1.04						1.73	0.18	2.12	1.15
2.88	0.61	1.9978	1.51903						2.05	0.94	1.14	0.64						2.28	0.15	1.71	1.19
2.15	1.7	2.27601	0.966605						1.9	1.79	2.74	0.95						2.11	1.35	2.61	0.83
2.32	0.94	2.59972	1.21101						2.58	0.33	2.37	1.52						2.42	0.5	1.95	1.26
3.01	1.37	1.37022	0.905995						2.82	1.09	1.61	0.91						2.12	0.98	2.05	1.19
1.7	0.65	2.44791	0.88549						1.93	1.99	1.94	1.49						1.82	0.96	1.97	0.95
3.09	0.47	2.14333	0.802169						1.91	1.45	2	0.83						3.34	1.67	1.63	0.58
3.97	0.73	1.82508	0.545044						2.64	0.98	3.13	1.01						2.16	0.48	1.36	0.58
1.91	0.73	2.74203	1.12342						2.73	1.93	1.51	1.22						1.34	0.78	2.67	1.47
3.54	0.41	1.66454	1.38646						2.67	0.26	1.95	0.74						1.4	1.78	1.82	1
4.16	0.93	1.54672	0.855429						2.33	0.7	2.49	0.93						2.39	0.4	1.56	1.51
3.43	0.41	2.88441	0.829956						3.1	1	1.84	1.12						2.81	1.33	1.68	1.24
1.57	0.27	2.41355	1.22978						2.16	0.59	1.57	1.4						2.84	1.45	1.76	0.94
2.1	0.97	2.26535	1.1342						2.25	2.14	1.72	0.74						1.98	1.46	1.31	0.49
2.47	1.38	2.32305	0.764776						2.23	1.02	2.58	0.93						2.54	0.32	2.66	0.93
2.37	1.02	1.74336	1.0184						2.74	0.32	1.41	1.45						2.08	0.75	2.06	0.96
2.62	0.59	2.85743	0.892434						1.95	1.1	2.41	1.09						3.15	1.58	1.62	1.09
2.18	0.67	2.00448	0.760153						2.14	1.03	1.61	1.07						3.06	0.59	1.74	1.12
1.45	0.45	1.84496	0.825968						2.69	0.23	1.74	1.17						1.72	0.76	2.74	1.15
2.57	0.84	2.10387	0.639527						3.22	0.24	4.1	0.8						1.5	1.82	3.14	0.87
1.84	0.99	2.42793	0.983281						2.45	1.57	1.47	1.31						2.64	1.24	1.31	0.91
3.2	0.91	1.63469	1.15381						3.58	1.63	2.1	1.04						1.7	1.3	2.55	0.88
1.14	0.7	2.33437	0.954608						2.31	1.04	2.08	1.16						2.11	0.46	2.73	1.18
2.89	1.6	2.98695	1.02102						1.98	1.14	1.79	0.94						2.81	5.9	1.86	0.82
1.55	1.14	2.02867	1.0373						1.93	1.93	1.72	0.78						2.16	0.61	2.36	0.79
3.18	0.34	1.87387	1.42511						2.56	0.39	1.89	0.8						2.84	0.24	2.38	1.38
2.8	0.41	1.40272	0.498288						4.86	0.3	1.54	1.65						1.92	1.86	2.44	1.29
3.09	0.67	2.07528	0.859177						1.76	1.02	2.19	0.5						2.08	0.94	1.87	1.12
2.24	1.1	2.65953	1.09173						3.14	0.18	1.89	0.89						2.65	0.8	2.1	0.76
2.72	0.84	1.69518	0.598886						2.02	1	2.89	1.04						3.02	1.22	1.49	1.2
2.04	1.2	1.76654	1.16334						2.04	1.61	1.82	0.9						1.88	0.42	2.78	0.85
2.51	1.51	2.70387	1.05856						1.91	1.01	1.44	0.58						2.3	0.39	1.86	1.21
1.87	0.96	2.47953	1.02826						3.66	1.04	2.49	0.95						2.98	0.27	1.62	0.92
2.54	1.92	2.80473	1.29793						3.51	0.66	2.88	0.79						3.54	1.15	2.54	0.87
2.24	1.38	2.02215	0.791258						2.34	1.27	1.82	0.91						3	1.2	1.97	0.67
2.42	1.5	2.237	0.834545						2.27	1.08	1.77	1.05						3	1.01	2.15	1.14
2.9	1.26	2.36753	0.938414						1.84	2.13	1.86	0.96						2.89	0.14	1.98	1.3
3.64	0.76	2.31526	0.943524						2.23	1.59	2.34	0.88						1.65	0.9	2.55	1.15
2.46	1.43	1.35416	1.35058						3.18	0.95	2.02	0.97						2.53	0.14	1.66	1.12
2.24	2.04	2.38144	1.33768						1.74	1.8	2.74	1.13						1.6	0.63	2.59	0.93
1.82	0.2	1.93478	0.541628						2.48	0.3	2.21	0.96						3.57	1.36	2.36	0.86
2.74	0.66	1.94175	0.73404						1.99	0.6	2.15	1.05						1.88	0.59	2.54	1.36
2.58	1.35	2.41383	0.803448						2.09	1.79	1.7	1.25						2.69	0.17	1.87	0.72
2.64	1.13	2.29135	0.730696						1.8	0.94	2.36	1.43						1.98	0.78	1.42	0.68
1.65	0.24	2.06035	1.27869						1.25	0.89	1.33	0.94						2.21	0.95	1.28	1.15
1.9	0.21	2.90146	0.826434						2.75	0.51	2.69	0.66						2.75	0.56	2.3	1.1
3.09	1.32	2.98237	1.39788						1.61	0.99	1.62	1.22						1.8	0.33	1.81	1.1
2.39	1.35	1.4386	0.379526						1.91	0.43	1.9	1.07						1.62	1.28	1.6	0.48
2.49	1.65	1.84191	0.754594						2.34	0.87	1.81	1.11						3.71	0.6	1.1	0.68
1.66	0.67	2.12509	1.12207						1.79	1.63	1.92	1.09						2.68	0.83	2.8	1.21
2.5	1.65	1.88027	0.976779						1.57	2.39	2.14	1.05						2.82	0.49	2.44	1.42
1.48	0.72	2.27152	0.784406						2.31	1.17	1.49	0.56						2.06	1.11	2.54	1
1.58	0.24	1.98132	1.02611						1.67	1.49	1.75	1.03						1.71	1.12	1.38	0.89
3.97	1.49	2.16764	0.683265						3.18	0.75	1.59	0.62						1.99	1.02	1.19	0.79
1.87	0.33	1.53111	0.999163						1.77	0.68	2.1	0.64						3.48	1.67	2.07	1.17
1.23	0.84	1.3792	0.733763						1.53	0.95	1.86	0.66						3.05	1.74	2.94	1.2
1.7	1.45	2.81747	1.35309						1.57	1.46	2.05	0.93						2.79	0.8	2.32	1.03
1.64	1.84	1.82439	0.908936						2.14	0.83	1.95	0.59						1.96	0.82	2.75	1.1
2.42	1.1	1.97345	0.834569						1.77	1.37	1.95	1.59						1.9	0.82	2.74	0.75
1.1	0.14	2.24555	1.01651						2	1.97	2.29	1.68						3.2	0.81	2.78	1.12
1.67	1.03	2.13312	0.693334						1.95	0.68	2.01	1.1						1.45	1.58	2.19	1.07
1.69	1.68	2.03335	0.764234						1.48	1.12	2.2	1.24						2.03	0.68	2.19	1.28
2.14	0.82	2.14767	1.05857						2.19	0.45	1.92	1.41						2.11	0.78	1.96	0.84
1.89	1	1.37821	1.18504						2.75	0.4	3.64	0.53						2.63	0.24	1.66	1.11
1.58	1.44	2.00269	0.855457						2.24	2.05	2.01	0.87						2.54	0.16	1.99	1.01
1.48	1.13	1.26585	0.7609						1.61	0.76	1.96	0.97						3.49	1.18	1.07	1.16
2.45	1.27	1.33614	1.13074						1.79	0.99	2.12	1.11						1.55	1.33	2.26	0.87
1.65	1.03	2.7025	1.55371						2.26	0.35	2.26	0.94						2.07	1.61	2.6	1.3
1.58	1.4	2.14283	0.845572						2.08	0.51	1.84	0.94						3.88	1.01	3.45	0.99
1.77	1.52	2.19394	1.12229						1.83	0.88	1.92	1.01						2.26	0.72	2.06	0.78
2.03	0.92	1.61934	1.03401						2.58	0.35	2.29	1.43						1.13	0.18	2.41	1.33
1.58	1.35	1.45433	0.9223						1.65	2.32	2.32	0.94						1.65	0.39	2.8	1.05
1.71	1.52	1.83814	1.07895						3.09	1.36	2.43	0.85						1.82	1.38	2.87	0.92
2.03	1.01	1.41996	1.13175						2.7	0.16	2.16	1.15						1.45	1.6	1.64	0.95
2.62	1.15	2.17058	0.729468						1.9	0.75	1.55	0.75						2.24	1.87	1.83	0.97
1.43	0.83	1.64727	1.54689						2.76	0.26	1.94	1.13						2.22	0.7	1.63	0.92
1.91	1.3	2.37992	1.04047						1.86	1.43	1.74	1.4						2.92	1	1.66	0.88
2.92	1.64	2.97863	1.28807						1.5	1.38	1.9	0.84						2.52	0.18	1.09	1.5
3.03	0.41	1.8144	1.34749						2.96	1.84	2.37	0.93						1.56	0.69	1.68	0.75
2.74	0.81	1.87257	0.65982						3.7	0.33	2.17	1.41						1.82	0.51	1.49	0.58
2.05	1.1	2.17303	0.758419						3.69	0.94	2.96	1.09						2.02	0.45	1.47	0.66
2.57	0.42	2.37434	0.985441						2.79	0.85	1.52	0.69						1.94	1.57	1.25	0.57
1.62	1.1	2.0824	0.928492						3.79	0.53	1.96	0.69						2.67	1.54	0.94	0.75
2.42	1.38	1.22439	1.33816						2.43	0.42	2.02	0.72						3.03	1.1	2.34	1.08
3.28	0.99	2.0161	0.921634						2.76	0.54	2.09	1.55						2.63	1	1.99	1.01
1.98	1.33	1.75724	1.03429						2.97	0.27	1.92	0.71						2.28	0.28	3.11	0.76
2.12	1.07	2.07968	0.883664						2.88	0.41	1.5	1.07						2.51	1.08	2.61	0.99
3.24	0.9	3.10579	0.853158						2.24	0.56	2.23	0.82						1.81	0.92	1.7	0.78
2.41	0.44	2.08781	1.04171						1.57	2.04	2.24	1.14						1.32	1.32	2.98	1.41
1.93	0.22	2.41139	1.33435						1.61	2.35	1.71	1.04						1.79	0.68	2.96	1.39
2	0.89	2.24056	1.59112						1.62	0.31	2.87	1.69						2.43	0.8	2.14	1.68
1.57	0.26	1.70441	2.06065						2.07	1.39	2.44	1.08						1.49	1.02	2.12	0.98
2.94	0.46	2.60456	0.992445						1.97	1.92	2.1	0.95						2.32	0.2	1.9	0.83
2.12	1.4	2.26906	1.46934						2.17	0.53	2.27	1.02						1.85	0.98	2.17	1.64
2.2	1.05	1.57483	0.876942						2.28	0.47	2.25	0.96						2.63	0.45	2.73	1.24
2.54	0.86	1.51978	1.19465						3.3	0.96	1.93	0.89						1.46	1.73	2.35	1.13
2.09	1.55	2.54697	1.35827						2.59	0.1	2.98	0.92						3.53	0.98	1.26	0.98
1.4	0.63	1.52385	0.975742						2.54	0.99	1.96	1.28						1.65	2.91	2.47	0.9
1.56	0.26	2.73729	1.19637						2.55	0.62	2.26	0.92						1.74	2.38	2.05	0.75
2.77	1.14	1.97033	0.963981						1.63	0.78	1.49	1.1						3.05	0.24	2.35	1.3
2.77	0.13	2.04684	1.14841						2.96	0.52	1.01	0.72						1.39	1.77	2.89	1.03
3.38	0.29	1.65998	0.725801						3.08	0.72	3.32	1.11						1.72	1.62	2	1.3
1.89	0.98	1.69716	0.692284						3.57	0.35	2.67	0.91						1.95	2	1.83	0.93
1.4	0.58	2.26793	0.806427						2.71	0.79	2.15	0.72						1.61	0.66	1.68	0.8
3.41	0.77	2.85025	1.12012						2.45	1.74	2.63	1.41						1.4	0.97	2.32	1.41
1.96	1.59	2.56325	1.61143						2.33	1.09	1.91	1.1						2.6	0.18	1.83	1.76
2.26	0.71	3.39065	0.858134						1.65	1.96	1.71	0.86						1.75	0.68	2.85	0.99
1.78	0.34	2.53233	0.837362						2.48	1.02	1.98	1.04						1.23	0.36	2.1	1.73
2.85	0.31	1.16837	0.634546						2.03	1.25	1.58	1.17						2.52	0.4	1.77	1.46
1.94	0.43	1.59275	0.900036						2.8	0.64	1.69	0.75						1.87	1.06	1.96	0.86
2.81	1.54	2.49702	0.744137						2.87	0.52	3.16	0.94						2.99	0.58	1.96	1.1
2.5	1.32	1.69155	1.41216						2.5	1.4	2.15	1.47						2.64	0.15	2.32	1.21
1.74	0.57	2.00964	1.4064						1.48	1.05	2.59	1.12						1.81	2.18	1.84	0.98
2.88	3.33	1.50519	1.66991						1.48	0.21	2.35	1.22						2.99	0.91	1.53	1.19
2.56	1.12	1.80835	0.943671						3.6	1.69	3.11	1.07						2.02	2.38	1.98	1.22
2.51	1.26	1.45184	0.430853						3.27	0.29	1.8	0.83						2.67	0.44	2.37	1.2
2.05	2	1.82362	1.07459						2.22	1.27	1.63	0.56						1.8	2.39	3.01	0.65
1.65	1.18	1.67953	0.82679						3.27	1.29	2.03	0.49						2.27	0.66	2.53	0.88
1.98	1.02	2.2702	0.648698						2.05	1.05	2.19	1.02						2.41	0.31	1.63	0.71
2.49	1.22	2.69737	1.37114						1.35	0.58	1.58	0.82						1.57	0.72	1.43	0.64
1.97	1.18	1.73812	0.978808						1.98	0.21	2.28	0.72						2.32	0.14	1.24	0.88
2	1.8	1.67508	0.715792						2.31	0.6	2.59	0.62						2.41	0.2	1.59	1.7
2.05	1.23	2.008	0.76137						3.62	1.3	2.28	1.01						2.65	0.22	1.59	1.1
1.97	1.61	1.27365	1.23538						2.37	0.58	1.37	0.74						2.86	0.79	2.36	1.37
2.98	1.22	1.55147	0.928117						2.15	0.28	1.54	0.56						1.7	2.47	2.56	0.81
2.68	0.17	2.27437	0.965916						3.41	1.03	1.68	1.3						1.29	0.23	2.59	1.05
1.99	0.96	1.58001	0.915214						2.11	0.68	3.36	0.81						2.77	0.34	1.6	0.86
2.02	1	2.20271	1.36162						1.86	0.91	1.41	0.59						2.23	1.29	2.16	1.02
2.64	1.26	2.46049	0.839729						2.5	0.31	1.04	0.98						1.69	1.61	2.34	1.06
3.33	1.95	1.71386	1.0022						2.03	0.35	1.87	1.04						1.75	1.3	2.58	1.39
2.96	0.83	2.51383	1.52973						2.04	1.81	1.69	0.48						3.59	1.54	1.87	0.87
2.4	1.17	1.90053	1.04354						3.44	40.7	2	1.13						2.66	0.29	2.3	0.85
3.87	0.65	1.55993	0.627873						4.32	1.57	2.24	1.07						3.65	0.82	1.58	1.23
1.86	0.74	1.46906	1.10346						1.4	1.14	1.88	0.8						2.79	0.54	2.19	1.36
2.96	0.7	2.50199	1.11845						2.48	0.27	2.7	1.28						3.24	1.16	1.58	1.76
2.83	0.97	1.54293	0.63498						2.15	0.48	2.06	0.81						4.14	0.39	2.53	0.93
2	1.79	2.86744	1.17603						1.7	0.62	2.39	0.78						2.84	0.55	2.05	0.98
2.4	0.75	1.96739	0.628869						2.42	1.3	1.72	1.46						2.67	0.58	1.88	1.05
4.25	1.17	1.45405	0.910463						2.46	0.12	1.43	1						3.05	1.21	2.08	0.86
1.85	0.52	1.93711	0.957565						2.78	0.13	2.09	1.18						1.44	2.39	1.69	1.16
2.57	0.92	1.6993	1.14122						2.84	0.19	1.47	1.2						1.45	1.09	2.41	1.1
2.45	1.12	1.95514	1.36147						3.1	0.94	2.43	0.88						3.29	1.56	2.85	0.73
1.43	0.49	2.18322	1.25699						1.79	1.75	1.32	1.07						2.4	1.58	1.26	0.72
1.91	0.92	1.34223	0.731984						2.05	0.94	2.6	1.25						1.73	1.33	2.47	1.22
1.16	0.27	2.46655	1.20869						1.96	0.41	1.62	0.8						2.44	2.36	2.24	1.32
2.07	1.62	3.48733	0.958139						3.14	1.35	1.36	1.89						2.79	0.79	2.43	1
2.04	1.31	1.82117	1.11572						2.26	1.64	1.3	0.98						2.77	0.41	2.04	1.38
2.18	1	2.31163	1.18197						2.29	0.23	2.07	1.02						2.94	0.62	1.92	0.72
1.54	1.32	1.8766	0.612664						2.32	0.69	3.05	1.27						2.61	1.52	1.61	1.11
1.67	2.43	1.86146	1.22406						1.98	1.79	1.37	1.26						2.43	0.31	3.53	1.23
2.83	0.95	1.35881	0.503183						3.45	0.35	1.42	0.81						2.72	0.31	1.7	0.95
1.97	1.69	1.48385	0.587269						2.42	1.51	2.32	0.85						3.75	1.45	2.28	1.29
2.18	0.5	1.45018	0.916423						2.84	0.16	1.82	0.69						2.04	0.98	1.35	0.87
2.29	1.25	1.2768	1.92167						2.21	1.23	2.58	0.81						2.53	0.63	1.43	0.93
1.58	1.29	1.64108	0.715471						1.45	0.87	2.31	1.32						2.6	1.03	1.75	1.16
1.47	0.93	1.96857	0.968101						2.11	0.9	2.23	1.39						1.86	2.47	2.47	1.17
3	1.13	2.57127	1.04428						2.04	0.95	1.31	1.14						2.16	1.82	1.71	1.07
1.54	1.08	3.233	1.20571						2.6	0.5	2.58	0.93						3.2	1.42	2.68	1.16
1.54	0.73	2.75255	1.32171						2.06	1.38	2.33	1.58						2.56	0.76	2.1	0.7
1.52	1.4	3.41603	1.09197						2.53	0.19	2.33	0.99						1.63	0.22	1.58	1.07
2.56	0.97	3.27471	1.25632						2.75	0.24	2.09	0.71						3.17	1.07	1.85	0.86
2.15	1.54	2.57823	0.961714						3.39	0.86	2.38	1.29						2.45	0.39	2.1	1.2
1.54	1.2	1.71824	0.895416						1.73	1.53	1.6	1.08						2.02	0.7	2.64	1.16
1.65	0.87	2.13845	1.03513						3.68	1.31	1.34	1.14						1.98	1.21	2.48	0.86
1.94	1.24	1.84229	0.671461						1.54	0.45	1.67	0.8						2.64	0.29	1.59	1.34
2.93	0.36	3.08799	0.645116						2.09	0.97	2.49	1.04						3.43	1.3	2.88	1.28
1.7	0.82	1.29432	0.820887						2.1	1.31	2.21	1.26						1.57	2.77	2.58	1.44
1.71	1.06	1.14171	1.67254						2.77	0.41	1.82	0.8						1.84	1.72	2.02	1.44
2.47	1.6	1.61105	2.1208						1.93	2	1.85	0.62						2.45	1.35	1.73	0.88
1.68	0.76	2.31399	0.847576						1.7	1.16	2.36	1.07						1.92	0.98	2.43	1.17
1.7	1.01	2.37414	0.779079						1.99	0.56	2.23	1.39						1.66	1.45	2.23	1.17
2.11	1.96	2.2411	0.950997						1.64	0.65	1.55	1.24						1.93	0.47	2.22	1.05
2.74	0.73	2.12061	0.909736						3.1	0.54	2.06	0.92						1.99	1.08	1.34	0.79
2.05	1.07	2.99819	1.24881						3.2	0.38	2.79	0.85						2.84	1.29	1.32	1.13
2.27	1.41	1.2868	1.58264						2.88	1.57	1.77	1.27						1.89	0.77	1.7	0.9
3.37	0.2	2.06037	1.07232						2.29	0.85	1.44	1.19						1.45	0.77	2.09	1.61
2.78	1.45	1.27319	0.841453						3.54	0.51	1.65	1.01						1.2	2.04	1.43	1.25
2.24	0.96	2.51245	1.30829						1.6	1.11	1.75	1.43						1.72	0.97	1.57	0.53
1.72	1.12	1.62469	1.32876						4.43	2	2.71	1.58						2.04	1.12	1.67	1.2
1.4	1.44	1.74799	0.795722						2.42	1	4.04	1.08						1.9	0.71	2.79	0.94
1.48	0.88	2.89314	0.916935						2.58	0.55	1.21	0.79						1.08	1.46	2.65	1.17
2.51	1.23	1.48283	1.00745						2.14	1.59	2.27	0.95						2.47	1.78	1.6	0.72
1.19	1.08	1.62867	1.35276						1.93	0.94	3.3	1.12						2.08	0.64	2.53	1.4
1.91	0.79	2.94512	0.944882						2.74	0.51	2.94	0.95						1.72	1.37	2.29	1.37
1.26	0.09	1.59265	1.13103						3.88	0.92	3.16	1						1.91	1.85	1.61	0.91
2.42	0.93	2.37315	0.581731						2.6	0.21	1.39	0.63						1.66	1.5	2.15	1.17
2.14	1.4	2.33461	1.15373						4.31	0.18	2.47	0.97						2.21	0.21	1.8	1.39
2.21	0.05	1.11663	1.36852						3.14	0.21	2.53	0.89						2.6	1.06	1.82	1.56
3.45	0.83	1.44197	1.13649						2.55	0.7	1.33	0.73						2.13	0.12	2.16	0.95
3	1.21	1.88135	0.658331						2.51	0.23	2.06	0.84						2.68	1.2	2.12	1.23
2.5	1.01	1.64907	0.964177						2.59	0.19	1.46	0.91						1.39	1.34	3.31	0.75
2.55	0.64	1.93677	0.722887						2.77	0.97	2.4	0.79						1.78	1.18	2.73	1.45
1.86	1.34	2.66054	1.0506						2.34	1.3	1.42	1.35						2.44	0.25	1.35	1.05
1.21	0.4	3.18067	1.03043						1.38	1.28	2.25	0.86						2.36	0.14	1.55	0.89
2.01	0.51	2.22379	1.08628						1.8	0.44	2.3	0.99						1.95	1.12	1.51	1.21
3.33	0.61	2.30811	0.813261						1.55	0.23	1.7	0.87						2.29	2.15	2.18	1.27
1.36	0.47	1.50687	1.42215						1.87	1.47	2.56	1.07						2.79	1.48	1.18	0.88
1.51	0.28	1.59003	0.877663						1.55	1.12	1.95	0.79						1.21	1.54	1.82	0.75
1.97	1.88	2.35719	0.913413						1.49	1.15	1.72	1.36						2	0.24	1.93	1.04
3.13	1.03	2.18229	0.792435						1.74	0.44	1.85	0.82						1.84	1.53	2.18	0.42
2.79	1	2.19135	1.39831						1.87	1.18	1.79	1.56						2.6	1.06	2.61	1.17
2.39	0.85	1.57358	0.827022						1.41	1.08	1.81	0.88						3.03	0.98	1.68	0.59
2.58	0.14	1.65966	0.835529						2.52	0.97	2.11	0.82						2.52	0.29	1.5	1.18
1.51	0.1	2.18051	0.813774						2.03	0.21	1.81	1.12						3.36	1.61	2.03	1.24
1.61	0.71	2.68078	1.25133						1.31	1.63	2.52	0.88						4.25	1.29	2.64	0.88
3.33	1.82	1.47279	0.979428						2.21	0.19	2.13	1.52						3.5	2.76	1.29	1.25
2.1	0.9	1.99765	0.721939						1.11	0.33	3.84	0.87						2.01	1.01	2.12	1.23
2.2	1.73	1.327	0.606954						1.18	1.55	1.9	0.62						2.38	0.94	3.84	1.06
1.66	0.95	1.45734	1.4424						1.74	1.16	3.56	1.08						2.02	1.24	3.15	1.15
2.71	0.05	2.02949	1.29971						1.98	1.02	3.88	0.84						2.78	0.85	1.65	1.35
2.82	1.03	1.23524	0.883492						1.48	0.9	1.85	1.18						2.74	0.16	1.43	0.62
2.4	0.99	1.20548	1.10442						2.43	0.39	1.63	0.86						2.47	0.31	2.3	1.35
2.26	1.64	1.52544	0.956426						6.86	0.33	2.04	0.71						2.26	0.53	1.7	0.63
2.34	0.59	2.82168	1.46796						3.11	0.89	2.51	1.12						1.94	0.19	2.26	0.94
1.55	0.35	1.43926	0.829296						6.52	1.32	1.97	0.84						2.39	0.94	2.19	1.16
1.79	0.55	2.00964	0.977504						3.05	1.32	1.8	0.69						2.52	0.16	1.6	1.02
1.88	0.23	2.10504	0.959659						2.65	0.28	1.38	1.32						3.02	0.7	2.4	1.11
2.79	1.46	2.55906	0.839979						2.48	0.12	1.53	0.74						3.82	1.4	2.22	1.06
2.28	0.81	2.87397	0.962831						1.68	1.09	1.81	0.68						2.05	0.83	2.09	1.47
1.45	0.54	1.67604	1.20924						2.39	1.13	2.17	1.19						1.82	0.82	1.73	1.45
3.52	0.21	2.07327	0.82137						3.01	0.81	2.16	0.74						2.35	0.3	1.79	0.82
2.24	1.25	1.97235	0.625108						2.31	0.91	2.18	0.81						2.32	0.76	2.84	1.11
2.8	0.86	1.81605	0.822588						1.66	0.89	2.53	1.13						3.32	0.48	1.68	0.75
2.49	1.24	2.4077	1.3231						1.87	1.97	2.15	0.82						2.92	1.38	2.48	1.32
2.21	1.73	1.29342	0.94107						2.86	0.8	1.39	0.93						2.44	0.42	3.21	0.72
2.48	1.48	3.00106	0.905052						1.6	1.65	2.49	1.29						2.77	1.25	2.54	0.82
3.82	0.77	1.38805	0.710255						3.18	0.75	1.88	0.86						1.6	1.49	2.06	0.98
1.94	0.91	1.64662	0.998921						2.97	1.44	2.2	0.86						2.39	1.05	2.47	1.48
2.57	1.04	1.36919	0.639911						1.72	1.47	2.24	1.09						4.66	1.74	1.77	0.44
2.42	1.26	1.79443	0.573481						2.2	2.51	1.88	1.2						3.69	0.47	2.25	0.9
3.07	1	1.42095	0.625879						2.49	1.1	2.05	0.98						3.25	1.1	2.11	1.06
2.14	0.91	1.98015	0.710563						1.62	0.45	2.64	0.83						3.34	0.32	2.48	1.2
1.37	1.24	1.14903	0.732542						1.51	0.16	2.1	1.3						2.06	0.52	2.54	0.93
1.76	2.02	2.47041	0.660602						2.52	0.29	3.07	0.84						2.29	0.44	1.11	0.5
1.15	0.69	2.16776	1.12478						2.6	1.7	2.32	0.8						1.84	1.34	2.66	1.05
1.67	0.56	2.75119	0.966166						2.41	0.79	2.24	0.81						2.47	0.85	1.39	0.8
2.27	0.77	1.97372	0.968389						2.77	0.49	1.66	0.9						1.89	0.91	1.46	0.76
1.79	1.13	1.7035	1.2758						1.94	1.6	2.83	0.85						2.58	0.74	2.04	1.21
1.4	0.33	1.6434	1.02344						1.88	1.19	1.59	0.68						1.89	1.11	1.73	0.96
2.22	0.91	1.44117	1.51394						2.1	1.13	1.61	0.95						1.43	0.99	1.43	0.63
1.93	0.79	1.36836	0.645751						2.18	2.01	2.64	1.55						2.77	0.32	2.3	1.24
1.96	0.41	2.32753	1.00856						1.79	2.22	2.09	0.97						3.41	0.97	2.69	1.04
1.53	0.43	2.18546	0.701103						2.77	0.49	2.53	1.59						3.12	0.65	2.27	0.75
1.57	0.3	1.85013	1.22091						2.49	1.57	2.19	1.11						2.12	0.86	1.5	0.83
1.84	1.95	1.16659	0.77178						2.53	0.4	1.94	0.49						1.92	0.63	2.12	1.53
3.34	1.07	1.91382	0.570679						2.89	0.22	1.55	0.81						2.04	1.1	1.72	1.31
1.76	1.12	2.46301	1.43873						2.63	0.73	2.18	1.09						2.83	0.84	2.35	1.03
1.7	1.86	1.8377	1.50208						3.54	1.13	2.09	1.17						1.68	2	2.34	1.26
2.81	0.32	1.86419	0.5734						2.13	1.94	2.84	1.68						3.34	0.49	3.03	1.59
1.16	3.14	1.89092	0.545099						2.76	1.31	1.42	0.56						1.96	0.73	1.77	1.33
1.17	1.37	1.40275	1.15294						1.93	1.85	1.63	1.12						3.51	1.33	3.4	1.51
2.28	1.46	3.67918	0.875799						2.47	0.77	2.25	0.96						2.95	0.23	2.43	1.43
1.37	0.17	2.53181	0.849455						2.18	0.84	1.99	0.9						2.9	0.18	2.56	0.74
2.52	1.64	2.06008	0.840297						2.97	0.44	1.3	0.78						2.27	0.62	2.46	1.59
2.01	1.44	1.33289	0.887452						1.62	1.04	1.48	1.7						3.17	1.57	3.51	0.9
1.33	0.14	1.57057	1.07789						2.98	0.2	2.64	0.75						2.74	0.46	3.13	1.33
2.1	1.07	1.68801	1.91532						2	1.22	1.7	0.69						2.12	0.87	1.91	0.69
2.74	1.72	3.00131	0.697957						1.94	1.43	1.63	1.11						2.13	0.86	1.56	0.97
2.2	1.85	2.44244	0.831131						1.92	1.14	2.14	0.73						3.42	0.83	1.74	0.82
3.03	1.23	2.67056	1.21074						2.5	0.98	2.13	1.43						3.3	0.15	1.36	0.53
2.09	1.28	1.93841	0.914206						2.31	0.56	1.76	0.84						1.84	1.37	1.95	1.09
1.83	2.04	2.68226	1.46054						2.34	0.68	2.44	1.09						1.98	2.02	3.61	1.27
1.68	1.02	2.09832	0.92611						1.78	0.37	2.85	0.91						2.44	1.17	1.58	1.39
2.31	1.1	2.80696	0.885111						2.94	1.05	1.45	0.59						1.89	0.19	1.33	1.08
1.72	0.43	1.74253	0.909886						1.91	0.47	2.31	1.12						1.79	1.2	2.81	1.12
1.7	1.34	2.40217	0.779409						1.91	0.76	1.73	0.83						1.66	0.66	2.08	0.77
3.05	0.92	2.19235	1.04755						1.72	0.8	1.86	1.15						2.51	1.6	2.05	1.1
2.67	1.46	2.74733	1.19239						2.48	0.35	1.9	1.04						1.66	0.61	2.96	1.21
3.67	1.13	2.35749	0.667009						2.08	0.5	2.3	1.24						2.61	0.72	2.14	1.16
2.62	1.19	1.60046	1.26069						2.3	0.32	1.55	0.54						1.99	2.08	1.69	1.23
2.44	1.71	1.35156	1.08842						2.21	0.41	1.48	1.39						1.16	0.8	2.46	0.96
1.9	0.8	2.34803	1.16023						2.37	0.26	2.04	1.35						2.4	0.36	1.29	1.48
2.9	1.65	2.37415	1.3134						3.14	0.78	2.21	1.25						1.06	1.86	2.32	1.31
1.31	2.76	1.50386	1.10231						2.63	1.79	3.36	0.8						2.56	1.41	1.53	1.4
1.58	0.86	1.74924	0.750682						2.46	1.62	3.31	1.17						2.47	0.2	2	1.06
1.71	0.98	2.22692	1.0022						2.18	1.36	2.64	1.02						2.1	0.3	2.87	0.71
2.73	1.02	2.68261	1.37057						2.81	0.4	1.84	1.09						1.17	0.28	2.02	1
1.57	1.44	0.895545	0.714167						2.87	0.22	1.6	0.45						2.31	0.85	1.98	1.3
3.49	0.69	1.45268	1.01858						2.25	0.29	1.95	0.77						1.55	0.94	2.07	0.96
1.79	0.6	2.3285	0.957104						1.9	0.85	1.31	0.97						2.1	0.99	2.53	1.54
2.45	1.37	1.64635	0.917448						3.44	0.87	1.68	1.01						3.15	0.8	3.04	0.74
3.25	1.7	3.12594	1.1249						2.84	0.54	1.14	1.44						2.27	0.43	2.68	1.51
2.48	0.78	2.41328	1.02292						2.51	1	2.07	0.62						1.77	2.38	1.75	0.86
2.42	1.32	1.50629	1.27891						2.48	0.49	1.66	1.67						2.47	0.09	2.55	0.57
1.81	1.48	1.58099	0.945494						2.69	0.11	2	0.67						3.1	1.31	2.69	1.5
3.68	0.45	1.62092	0.825127						2.75	0.2	2.38	1.06						2.83	0.21	2.55	0.96
2.63	1	2.29326	1.30668						3	1.75	2.3	1.66						2.23	0.53	2.6	1.1
1.81	0.46	2.08798	1.69651						1.52	0.71	1.64	1.07						2.29	0.34	2.49	1.41
2.13	1.16	1.81754	1.69421						3.31	1.71	1.64	1.11						4.02	1.35	2.07	0.91
1.36	0.52	1.2705	0.776676						3.04	0.17	1.7	1.29						1.38	0.64	1.44	1.06
2.92	1.14	2.02361	1.06063						1.78	2.39	1.76	0.92						1.73	2.05	1.63	0.65
2.97	1.05	2.55456	1.41895						2.33	1.1	1.49	0.74						1.89	1.32	2.06	0.99
1.8	1.08	1.99884	0.681774						2.85	0.34	1.63	1.41						2.11	0.6	2.57	0.86
1.6	1.04	1.64022	0.762195						2.82	0.23	1.6	0.38						2.33	0.41	1.68	1.06
1.77	1.35	1.7192	1.7332						2	1.8	1.99	1.31						2.66	0.18	1.72	0.82
3.05	1	1.36413	0.599087						1.41	0.66	2.13	1.18						2.34	0.46	3.41	1.08
3.51	0.5	2.37639	0.851197						2.15	1.76	2	1						2.12	0.32	1.31	1.08
2.64	1.21	2.70314	1.35405						2.99	0.34	2.88	0.73						2.79	0.79	1.92	0.87
1.4	0.37	1.45339	1.86564						2.42	0.54	2.19	1.09						2.39	0.2	2.2	0.99
2.18	1.75	2.36098	1.1896						2.47	0.18	1.92	1.23						1.93	1.48	3.05	0.94
1.99	1.42	2.63651	1.53404						2.34	1.14	2.56	1.43						2.1	1.03	2.41	1.09
2.64	1.87	2.79881	1.36299						2.03	1.58	2.31	1.64						2.52	0.28	1.83	0.77
2.05	1.88	2.21258	1.3562						2.39	0.33	2.59	1						1.59	1.52	1.79	1.3
2.05	1.12	1.77584	0.859704						2.87	0.9	2.1	0.79						2.73	0.17	1.44	0.84
3.05	1.13	1.81764	1.55477						1.88	1.19	2.53	0.65						1.91	1.62	2.89	1.06
2.51	0.97	2.493	1.20252						2.61	0.77	1.78	0.63						2.91	0.54	1.67	0.69
1.55	0.19	2.17992	1.31037						2.06	1.15	2.41	1.32						1.43	1.57	2.68	1.14
1.62	1.34	1.89481	0.553541						2.69	1.42	1.84	1.23						3.43	1.43	3.35	0.62
1.56	2.01	1.93626	0.784246						2.03	1.64	1.3	0.92						3.44	0.92	2.77	1.16
1.58	0.75	2.42577	1.29997						2.8	1.31	2.37	0.71						2.23	0.93	1.78	0.65
1.68	0.36	3.03884	1.14552						3.43	1.6	2.62	1.06						2.21	0.9	2.04	1.01
2.38	0.1	1.69223	0.94008						1.71	1.44	1.91	1.53						2.56	0.15	2.47	0.91
1.55	0.88	1.44564	1.00379						2.1	1.47	1.89	1.13						2.53	0.25	1.66	1
1.37	0.4	2.59552	1.00883						2.21	0.63	1.98	0.73						2.12	1.97	2.82	1.78
2.78	0.68	1.48907	0.878937						1.56	0.71	2.91	0.66						3.48	1.65	2.57	1.23
1.37	1.48	1.36929	1.17349						1.24	0.9	1.89	0.9						3.7	1.29	2.46	0.78
2.82	0.39	1.88276	1.02069						2.59	0.32	1.91	1.15						1.56	0.85	1.66	1.37
1.63	1.91	2.69244	1.60898						2.36	0.33	1.66	0.57						2.12	1.36	1.97	1.02
2.55	0.85	1.24214	1.3237						1.91	0.1	1.57	0.91						2	1.78	2.78	1.39
2.54	0.21	2.71098	0.958157						1.57	0.62	2.05	0.97						2.26	0.36	1.71	0.59
1.56	0.33	1.21793	0.777853						1.99	0.59	2.71	1.23						3.25	0.64	3.02	0.88
1.36	0.37	1.70203	1.05089						3.4	1.56	1.48	0.72						1.84	2.29	2.61	1.44
1.35	0.2	2.29329	1.13193						2.43	0.46	2.35	0.81						2.88	1.3	1.95	0.78
1.77	0.84	1.34824	0.708453						3.02	0.31	1.94	1.21						2.23	1.1	2.07	1.04
2.48	1.1	1.54901	1.04078						3.4	0.78	2.73	1.07						1.89	1.9	1.92	0.88
1.69	1.63	1.17669	1.41673						3.1	0.49	2.24	1						2	0.58	1.56	1
1.91	2.06	1.75606	0.906549						2	1.97	1.32	0.73						2.34	0.86	1.7	0.82
3.03	1.01	1.38227	1.02771						3.49	1.56	2.24	1.36						1.99	0.94	2.03	1.14
1.48	0.23	1.99622	0.836383						1.68	1.55	2.53	1.31						1.97	1.67	1.99	1.02
1.56	0.85	2.57055	0.732604						2.7	0.16	2.27	1.03						1.43	0.65	2.52	1.48
1.66	1.33	2.20584	1.24186						2.66	0.25	2.87	0.86						2.19	1.1	1.55	1.15
2.93	0.28	3.99471	1.2528						2.28	1.46	2.75	1.19						1.91	0.28	1.85	1.01
2.6	1.21	1.73296	0.727116						3.76	0.76	2.42	0.91						1.13	1.72	2.06	0.57
2.05	1.66	1.66331	0.840029						2.14	1.76	2.02	0.86						1.58	0.75	1.53	0.68
2.12	0.63	3.0724	1.16639						2.21	2.43	1.72	0.7						2.15	0.31	2.21	0.87
1.75	0.66	1.85501	0.989936						1.79	1.67	2.26	0.96						1.3	1.97	2.03	1.23
1.64	0.5	2.36427	0.655951						2.87	0.81	1.54	1.61						2.93	1.09	1.61	1
1.76	0.64	2.5038	1.26049						2.85	0.72	1.19	0.51						1.97	0.7	3.25	1
2.53	2.1	2.44653	1.07763						2.36	1.55	1.56	0.57						1.61	1.36	2.31	1.42
1.95	1.02	1.64735	0.957918						1.87	1.05	1.79	1.15						2.46	0.71	2.77	1.25
1.63	0.82	2.02643	1.06186						2.01	0.68	1.34	1.14						2.25	0.26	1.14	0.82
1.78	1.1	2.48535	1.1297						1.29	1.05	1.71	0.96						2.3	0.18	1.93	1.14
2.46	1.12	1.43982	1.02846						1.86	0.2	2.13	0.73						1.71	0.21	1.74	0.89
1.22	0.59	1.98137	0.631981						2.35	0.39	2.26	1.03						1.6	1.38	2.73	1.1
1.54	0.25	1.98315	0.936759						1.85	0.76	1.84	1.01						1.44	1.05	2.86	0.98
2.64	0.7	2.88543	1.12308						1.82	1.52	2.62	1.49						3.44	0.65	2.65	1.2
3.06	0.32	1.56717	0.572346						1.61	1.38	2.33	1.27						1.94	1.28	1.76	1.44
1.65	0.35	1.90231	1.05166						1.55	1.97	2.66	1.03						2.74	0.59	2.19	1.08
2.78	0.87	1.0871	1.42772						2.98	0.71	1.96	1.18						1.69	0.79	1.63	0.8
2.35	1.34	1.67265	1.95899						2.94	0.93	1.76	1.05						3.01	0.3	2.91	1.68
2.44	1.61	2.4409	1.60451						2.47	2.01	1.6	0.52						2.77	0.96	1.6	0.57
2.82	0.99	2.33812	1.14198						2.6	0.11	2.05	1.16						1.67	0.97	2.49	1.22
2.06	1.28	2.37621	0.684822						1.76	0.96	2.96	0.22						1.57	1.7	2.61	0.77
3.3	1.64	2.02764	0.816754						3.25	0.47	2.17	1.1						3.15	1.11	1.68	1.36
3.24	0.43	2.23104	1.16331						2.29	1.2	2.41	1.17						2.78	0.97	1.74	1.05
2.32	1.32	1.95617	1.17968						2.81	0.18	1.74	0.59						3.13	0.62	1.94	0.33
2.58	1.28	1.84781	1.06175						2.24	0.71	2.34	0.81						2.04	0.24	1.4	0.99
1.8	0.79	1.59507	0.941904						1.7	0.78	1.61	1.15						2.85	1	2.29	1.59
2.53	1.07	2.25898	0.342121						2.34	1.04	1.86	1.1						1.76	1.87	1.83	0.55
3.37	1.62	2.17289	0.584961						1.73	1.25	2.12	0.96						2.29	1.18	1.47	1.68
3.99	0.13	1.47024	0.961021						1.71	2.31	1.96	0.97						2.06	1.2	3.02	0.77
1.73	1.64	2.15071	0.678146						3.08	0.73	1.44	1.18						2.17	0.19	2.3	1.02
2.2	1.44	1.55111	0.94961						3.59	1.86	2.27	1.18						2.89	1.17	2.55	1.26
2.86	0.64	2.67609	1.02075						2	1.48	2.01	0.8						1.44	2.04	1.5	0.47
2.72	0.49	2.55002	1.01584						2.01	0.86	1.68	0.99						2.12	0.99	2.34	1.34
1.34	0.93	2.52003	0.780904						2.02	1	2.61	0.76						1.44	0.36	1.91	0.54
1.55	0.45	1.85883	0.880342						1.89	0.62	3.1	1.11						3.43	1.23	2.1	1.18
2.48	1.11	2.05397	1.0004						2.35	0.16	1.88	0.96						2.3	1.4	1.33	1.15
3.25	0.79	3.02229	0.72098						2.17	0.85	1.7	0.79						2.68	0.48	2.01	0.92
3.49	0.19	3.08687	1.10927						3.29	0.08	4.22	0.62						3.29	0.55	1.81	1.18
2.19	0.3	1.71777	1.75769						2.2	1.11	2.77	1.26						2.43	0.17	2.94	0.9
2.33	1.63	2.27253	1.27181						2.52	1.03	1.87	0.97						2.11	0.99	1.79	0.76
1.48	0.97	2.7118	0.79832						2.08	1.28	1.8	0.5						3.85	1.69	2.2	1.24
1.85	1.11	2.47939	1.257						1.74	1.32	3.89	0.97						2.38	0.73	1.98	0.67
2.1	0.81	4.12804	1.03078						1.54	2.28	1.81	1.16						2.45	0.18	2.19	0.85
5.25	0.28	2.81282	0.908281						1.44	0.78	3.13	0.97						2.77	0.68	2.88	0.98
1.21	0.45	3.09976	0.755714						3.32	1.18	3.11	1.27						3.55	1.59	2.05	0.91
1.49	1.05	2.38695	0.987332						1.79	1.31	1.69	0.88						2.16	0.84	1.52	0.76
1.66	1.36	1.99436	1.06214						2.63	1.03	2.01	0.64						2.9	0.99	1.5	0.76
1.3	0.87	2.48428	1.34285						1.63	0.93	2.27	0.97						2.12	0.53	2.66	1.04
1.21	0.72	2.53334	1.26395						1.7	1.29	2.61	1.24						1.37	0.79	3.16	0.83
1.79	0.82	2.08272	0.707072						4.42	0.23	2.93	1.13						3.24	1.08	1.89	1.5
1.32	1.03	2.14684	0.847526						2.11	0.75	1.3	0.8						2.54	0.59	2.73	1.11
2.55	1.22	1.86773	0.925113						4.14	1.34	1.99	1.39						1.64	2.02	2.9	1.19
1.5	2.4	1.41626	1.007						2.35	1.24	2.83	1.12						2.69	0.57	1.99	1.02
1.66	0.48	1.77744	1.32291						2.13	1	1.4	1.17						3.22	1.66	2.33	1.01
2.05	1.09	2.80296	0.758524						3.02	0.69	2.15	0.95						2.26	0.37	1.83	1.15
2.63	0.19	2.41795	1.12336						2.03	2.08	1.81	1.42						3.11	0.18	2.6	0.67
2.58	0.26	2.17891	1.30113						3.42	1.05	1.33	0.82						2	1	1.74	0.59
1.56	1.11	2.30085	1.34944						2.47	0.85	1.65	0.92						2.81	0.29	1.23	0.62
1.08	0.26	2.27968	1.08914						1.75	1.2	2.63	1.09						1.36	0.32	2.01	0.89
2.29	1.84	2.05693	1.08804						1.43	1.13	2.11	0.93						2.86	0.24	1.54	1.29
2.08	1.26	1.90493	1.14232						2.82	0.39	1.35	0.73						2.67	0.2	2.8	0.72
1.61	0.94	1.83585	1.19318						2.06	0.87	1.84	1.19						2.08	0.89	1.48	1.2
2.18	1.05	2.4975	1.45097						2.1	1.04	1.51	1.1						1.74	1.12	3.13	1.11
2.09	2.02	2.94337	1.04832						2.02	1.21	2.01	1.16						2.08	1.71	1.75	0.62
2.49	1.14	1.67832	1.48927						2.58	0.06	1.51	1.33						1.8	1.1	1.71	0.8
1.38	0.13	2.31617	1.11026						1.7	0.99	1.8	1.41						1.65	2.06	2.6	0.86
1.17	0.79	1.7485	0.811344						2.62	0.21	2.56	1.22						3.5	1.09	1.38	1.29
2.3	0.77	1.2545	1.63656						3.01	1.08	2.39	0.66						2.84	0.44	2.74	1.02
3.04	0.48	2.23776	1.21721						2.32	0.19	1.44	0.73						2.7	0.41	2.75	0.79
2.16	1.23	2.51423	1.01205						1.53	0.58	2.71	1.02						1.54	2	2.58	1.26
2.11	1.31	3.105	0.80086						1.81	1.37	2.34	1.03						2.82	0.5	1.65	1.76
2.18	0.88	2.7518	1.268						1.76	0.63	3.09	0.75						3.52	0.85	2.27	1.17
1.34	0.72	2.77492	0.921587						2.14	1.32	1.53	1.92						2.61	0.35	1.82	0.67
2.21	1.01	2.43591	0.716619						0.98	1.03	1.95	1.21						2.3	0.32	1.72	0.78
1.72	0.48	1.85003	0.698495						1.88	0.46	2.17	0.8						1.83	1.88	2.52	1.56
2.5	0.68	1.73487	1.65869						2.64	0.22	1.79	0.72						3.3	0.74	1.64	0.49
1.2	0.81	2.14892	1.05939						1.64	1.09	1.5	0.68						1.64	1.8	1.69	0.88
1.37	0.61	2.63004	1.15325						1.88	0.57	1.63	1.18						2.74	0.72	2.37	0.71
2.34	1.3	3.02352	1.16132						3.15	1.15	2.52	1.22						3.39	0.91	2.14	0.79
1.98	2.21	1.93189	0.752242						1.82	2.19	2.19	1.12						0.96	2.81	1.44	1.41
3.99	0.64	2.50708	0.976253						2.91	0.3	1.56	0.48						1.73	0.37	1.59	0.49
2.25	0.66	1.62539	0.894157						2.65	0.82	3.44	1.02						2.33	0.73	2.2	1.1
2.26	1.23	1.32292	0.552473						1.58	1.03	2.3	1.44						3.06	0.83	2.53	0.94
1.9	0.42	2.24207	0.896407						1.78	1.25	2.55	0.78						2.29	1.08	3.55	0.85
2.65	0.87	1.87787	1.32441						3.3	1.22	2.13	1.38						2.24	0.36	1.87	1.18
2.03	0.6	1.96054	1.32274						2.34	2.04	2.98	1.26						1.58	0.96	2.88	1.11
2.95	0.54	2.89917	1.22707						2.35	0.84	1.99	1.26						3.44	0.58	1.54	1.16
2.36	1.31	2.23256	0.542265						2.79	1.64	2.08	1.29						2.31	0.2	3.17	0.95
1.46	2.13	2.45424	0.837414						1.76	0.45	2.04	0.97						3.63	1.06	1.86	0.88
2.12	1.33	1.85821	0.835061						3.44	0.29	2.58	3.42						2.19	0.91	1.61	0.73
2.19	1.19	2.80624	1.10456						2.93	0.81	1.81	0.89						1.75	1.97	1.58	0.86
1.57	0.8	1.72038	0.836079						3.29	1.15	2.83	1.11						1.85	2.76	1.48	0.56
1.91	1.23	1.95127	1.03316						2.67	0.07	3.15	1.17						2.75	1.59	4.11	1.01
3.45	0.17	1.97568	0.956455						2.66	0.27	1.73	1.02						1.77	0.22	2.51	0.91
3.5	0.48	2.02595	1.22082						1.31	1.38	1.4	0.89						2.54	0.58	1.81	0.95
1.47	1.38	1.93965	0.775639						1.73	1.09	2.76	1.15						2.58	0.99	2.52	1.21
2.75	0.97	2.06162	1.20382						3.18	1.81	2.71	0.99						1.63	2.59	1.58	1.1
1.77	1.06	1.61796	0.967041						2.29	0.34	1.29	0.81						1.29	0.63	2.11	1.14
2.39	1.05	2.94551	1.39223						2.11	1.15	1.77	1.5						1.81	0.54	2.16	1.05
1.48	0.2	2.66287	1.1501						1.91	0.57	2.04	0.97						1.59	1.45	1.66	1.09
3.13	0.91	2.61315	0.883401						2.4	1.19	3.42	0.76						3.51	1.17	2.04	1.67
1.93	0.25	1.90341	0.75776						2.49	0.29	2.1	1.74						2.42	0.87	1.27	0.56
2.38	0.68	1.76644	0.953492						6.79	0.46	1.84	1.24						2.61	0.87	2.37	1.28
1.45	2.56	1.66152	0.757929						6.52	0.55	2.44	1.4						3.37	1.34	2.58	1.26
2.01	1.04	1.83882	1.33672						2.04	2.35	2.24	1.37						3.14	1.94	2.67	0.87
1.91	0.88	2.19994	1.04029						2.77	0.62	2.49	1.26						1.41	1.39	2.07	0.85
2.91	1.1	2.73975	0.70842						3.19	0.58	3.08	0.95						1.55	0.99	1.76	0.72
2.27	1.17	2.69196	0.917446						1.54	1.86	2.05	0.66						2.31	0.3	2.12	1.25
2.07	1.37	2.29548	0.830413						1.75	0.55	2.54	0.95						2.52	1.86	1.94	1.09
1.75	1.07	1.55274	0.779278						1.8	0.84	2.64	1.15						1.37	0.85	1.84	0.9
2.1	1.18	2.17423	1.00029						2.77	0.09	2.19	1.2						3.09	1.46	2.38	1.33
2.27	1.58	3.28387	1.29849						1.17	0.4	2.34	0.73						3.57	1.85	2.58	1.31
1.25	0.45	1.83255	0.728845						2.7	0.26	2.92	1.61						2.39	0.74	1.5	1.21
1.54	0.24	1.50326	1.34059						2.1	1.7	2.36	0.76						1.44	0.87	2.68	0.78
1.32	0.79	2.44731	1.29039						1.56	1.24	1.44	0.75						1.5	0.76	1.94	1
1.53	2.54	1.75124	1.06768						1.94	0.23	1.78	0.63						2.19	1.29	1.75	1.73
1.57	2.58	1.59383	0.712215						2.22	0.44	2.69	1.3						4.89	1.83	3.07	1.23
2.82	1.25	2.80163	1.22642						2.38	0.28	2.25	0.89						1.74	1.17	2.91	0.92
3.74	0.18	2.47295	1.06938						1.32	1.27	2.53	1.24						2.76	0.34	1.93	0.88
2.8	1.09	1.776	0.20413						1.63	0.49	1.86	0.9						2.4	0.36	1.65	0.93
2.46	1.8	1.49056	0.752109						1.83	0.98	2.4	1.35						2.86	0.66	1.35	0.89
2.09	0.86	2.24572	1.38017						1.85	1.16	2.37	1.17						2.2	0.47	2.8	1.24
2.18	1.21	2.26957	1.07741						1.44	1.91	2.76	1.47						1.75	1.48	1.35	1.31
2.05	1.06	1.8102	0.488977						2.46	0.26	1.87	1.03						2.53	0.43	3.52	0.77
2.32	1.32	1.30194	1.30817						2.34	1.01	2.07	1.01						2.34	1.78	2.01	0.92
1.32	1.74	1.85322	1.40126						2.14	0.79	2.59	0.97						2.43	0.75	2.39	0.99
1.35	0.62	2.14078	0.586493						2.73	0.14	2.49	1.47						2.59	0.67	2.77	1.28
1.65	0.09	2.11764	0.503046						1.83	2.1	1.5	0.76						2.8	0.13	2.13	1.07
2.73	1.14	2.42894	0.930249						1.8	2.36	2.71	0.9						2.47	0.92	1.52	1.01
3.44	0.49	3.50731	1.02984						2.55	1.17	1.36	0.59						2.13	2.11	1.46	1.02
3.26	0.29	2.08131	0.834173						2.05	2.7	2.14	0.87						2.26	0.92	1.84	1.4
2.39	2.17	1.86813	0.673923						2.84	0.78	1.29	0.68						2.01	2	1.55	0.85
2.11	1.21	1.86037	0.766341						3.18	1.64	2.6	1.42						3.04	0.21	1.49	0.8
5.12	0.05	1.19202	1.40678						2.67	0.41	1.97	0.76						2.69	1	1.69	1.12
2.72	1.27	3.05003	0.591354						2.64	0.15	1.79	0.94						2.18	0.81	1.62	1.08
2.89	1.03	2.22107	0.443732						2.37	0.84	1.76	0.99						2.63	0.53	2.9	1.14
1.3	2.39	1.69233	1.12652						2.47	0.95	2.3	1.27						1.9	1.58	1.49	1.14
3.25	0.09	3.22441	0.797697						2.36	1.11	3.02	1.75						3.01	1.05	1.57	1.49
1.91	0.51	1.79256	0.961437						1.77	1.26	1.65	0.63						1.97	0.65	1.6	1.04
1.91	1.37	1.76882	1.19192						1.08	1.65	1.67	0.83						2.16	2.3	1.84	0.86
2.13	1.91	2.65825	1.03806						2.35	1.78	1.69	0.78						2.22	0.92	3.3	0.86
1.5	0.96	2.37902	0.863259						2.1	0.81	1.76	1.25						2.61	0.93	1.86	0.78
2.21	1.34	2.31137	1.0532						2.16	0.9	2.19	0.9						2	1.16	1.85	1.54
1.55	3.53	2.08118	0.570377						1.56	1.49	1.33	1.01						1.94	1.98	2.83	0.78
1.36	1.77	3.1801	0.766299						1.66	1.33	1.44	0.96						1.49	0.45	1.78	0.82
1.48	0.67	2.36058	1.70633						2.53	0.38	2.42	1.05						2.5	0.55	1.97	1.62
3.37	1.28	1.86573	1.3483						2.47	0.22	1.77	0.92						1.49	0.61	1.6	0.73
2.18	1.86	2.30576	1.08494						2.37	0.33	3.58	0.84						3.39	0.93	1.82	0.71
2.3	0.48	2.15418	1.03648						1.47	1.39	1.78	0.92						1.51	1.12	1.88	1.35
1.48	1.26	2.15876	0.786016						1.22	0.8	1.49	0.38						2.66	0.42	2.36	1.85
1.78	1.54	2.19968	1.47882						1.08	0.7	1.62	1.44						2.48	1.69	3.7	0.62
1.26	0.9	2.52084	0.745178						2.11	3.83	1.84	0.66						2.49	0.77	2.34	1.18
1.28	0.6	2.30856	1.01349						2.2	1.3	1.67	0.78						1.97	0.81	2.4	1.17
1.84	1.49	2.38303	1.07308						2.44	0.15	2.43	0.64						2.71	0.12	1.67	0.65
1.38	1.06	2.22694	1.25407						3.62	1.41	1.89	0.59						4.25	0.93	2.59	0.55
2.03	0.72	1.52044	0.964316						3.37	1.18	1.95	0.74						2.3	0.53	2.14	1.15
2	1.16	2.347	0.978861						2.45	0.58	2.2	0.8						1.65	1.28	2.14	0.77
2.13	2.42	2.1845	0.917191						2.84	0.45	2.11	0.93						1.92	1.08	1.77	0.75
1.29	1.53	1.46297	1.04914						2.02	1.45	2.02	1.35						1.53	1.61	2.6	1.34
1.98	1.26	1.82401	1.09167						2.37	1.07	1.76	0.74						2.46	0.42	3.61	1.21
2.45	0.91	1.65461	1.29214						2.13	0.48	2.05	1.09						2.48	1.17	2.35	1.13
1.51	1.27	1.5032	0.825121						1.82	0.59	1.49	1.83						1.98	1.25	2.16	0.83
2.34	0.42	1.31888	0.753239						1.96	0.43	3.01	1.38						2.76	0.1	2.59	0.78
1.8	1.74	1.09985	1.0924						1.8	1.28	1.93	0.85						1.95	1.83	2.3	0.93
2.26	0.91	1.94075	0.698024						1.23	1.57	1.83	1.04						1.25	2.27	2.4	0.87
1.73	1.49	2.16845	0.771126						1.77	2.39	1.7	0.62						2.73	1.76	2.18	1.12
2.54	0.56	1.52984	0.865607						2.02	0.68	2.08	0.86						1.85	0.73	2.04	1.14
2.43	0.29	2.02221	1.25842						1.71	1.39	2.85	0.7						2.64	1.77	1.78	0.85
2.28	1.16	1.37539	0.602854						1.32	1.69	1.9	0.78						2.09	1.06	1.5	1.17
2.29	1.03	1.50084	0.923823						2.19	0.68	2.14	1.02						1.09	1.55	1.76	0.57
1.76	0.75	2.49749	1.1069						2.06	0.84	1.61	0.55						1.54	2.5	1.74	1.34
2.21	1.11	2.60192	1.22466						1.34	1.88	1.85	0.78						1.2	1.39	1.72	0.69
1.47	0.46	1.28295	0.579438						1.73	0.87	2	1.37						2.28	1.83	2.04	0.87
1.63	0.74	2.08337	1.09011						1.4	1.09	2.21	1.54						1.71	0.36	2.09	1.02
2.19	0.67	2.1033	1.24311						2.12	0.68	3.54	1.03						1.26	2.4	1.28	1.31
1.46	0.83	2.3538	0.978431						1.98	2.2	2.18	1.04						1.29	2.31	1.9	0.92
2.49	2.09	1.54273	1.51456						3.23	1.08	1.84	1.2						2.19	0.25	2.89	1.17
1.54	1.71	1.95168	1.1415						1.61	3.57	2.32	1.13						1.81	0.2	1.87	1.34
3.2	0.16	1.45287	1.53496						2.1	0.42	2.19	0.88						2.52	0.25	1.41	0.75
1.9	0.94	1.72444	0.547659						1.44	0.91	1.53	1.01						2.01	0.31	1.62	0.96
1.49	0.7	1.90835	1.27787						1.7	1.95	2.18	2.05						1.8	2.05	2.48	1.06
2.46	1.28	2.04143	1.34794						3.07	0.21	2.05	1.04						2.09	0.25	2.81	0.93
2.5	1.5	1.79224	0.754119						3.12	1.09	1.46	0.35						2.12	0.3	1.87	0.98
2.17	1.84	2.80269	1.04465						1.85	1.68	1.83	1.21						4.49	1.26	3.18	0.92
2.03	1.78	2.27609	0.678425						2.29	0.29	1.95	0.91						1.41	2.66	2.77	0.89
1.02	1.48	2.43025	0.955535						1.72	2.06	2.5	1.49						1.19	1.05	2.05	1.32
2.26	1.26	2.17075	0.859322						2.86	1.69	1.69	0.61						1.61	1.32	2.36	0.69
2.54	1.01	2.27084	0.903053						1.59	0.82	1.89	1.29						2.26	0.73	2.11	1.06
2.85	0.4	3.64896	1.04615						1.37	1.26	1.8	0.65						2.35	0.56	2.2	1.05
1.31	0.19	2.10679	1.05653						2.72	0.25	1.29	0.76						1.53	1.5	2.45	1.08
1.89	1.76	2.47263	1.15848						2.34	0.65	3.71	0.71						2.82	1.17	2.06	1.05
2.57	1.44	2.34625	0.924427						1.73	1.68	2.05	1.09						2.66	0.22	1.56	0.81
1.62	1.01	1.85565	0.558806						1.51	0.72	2.35	0.95						1.88	1.08	2.25	1.75
1.51	0.97	2.34198	1.1852						2.51	1.2	2.77	1.17						1.94	2	2.1	1.07
2.1	1.19	2.88939	0.956341						2.32	0.8	1.48	0.81						3.37	1.19	1.19	1.05
1.86	0.7	1.94063	0.852696						2.04	1.26	2.3	1.06						1.51	1.95	1.57	0.82
2.41	1.17	1.84465	0.997558						2.25	1.88	2.59	1.08						2.76	0.71	1.97	0.88
2.49	1	1.18983	0.871346						1.48	1.86	2.42	1.01						2.15	0.13	1.82	0.82
2.79	1.05	2.1702	1.24477						2	1.75	2.03	1.06						1.68	2.07	2.1	0.76
2.72	1.77	2.23685	0.96089						2.88	0.72	1.79	0.61						2.28	0.16	2.87	1.15
2.41	1.13	2.42507	0.967998						1.57	1.13	1.58	0.79						2.6	0.18	2.12	1.03
1.55	0.55	1.81372	0.892092						3.11	0.49	2.04	1.24						2.11	0.61	2.26	1.22
2.73	1.21	2.67102	1.08773						3.12	0.09	3.25	0.88						1.44	2.28	1.6	0.77
2.36	1.61	2.17252	0.880672						2.24	0.6	3.07	0.88						1.62	1.67	1.4	1.09
2.69	1.61	1.54303	1.2333						1.46	0.82	2.03	1.18						1.92	0.99	2.65	0.96
2.6	2.09	1.59353	0.276427						2.03	1.86	2.18	0.59						2.59	0.14	1.47	1.03
2.54	0.73	1.16824	1.11376						3.31	0.24	1.49	1.14						2.22	0.32	2	0.67
2.53	1.01	1.99505	0.630529						2.19	1.67	2.3	0.81						2.29	0.92	1.66	0.75
2.44	0.74	1.59786	1.56817						2.37	1.03	1.87	0.56						1.69	1.85	1.79	0.61
2.48	1.26	1.35317	1.76844						1.76	0.85	1.57	1.35						2.45	2.44	1.82	0.84
3.55	0.13	1.48598	1.12214						3.24	0.12	1.56	1.05						2.33	1.72	2.01	1.43
2.69	0.65	2.2538	0.861007						1.2	1.09	2.48	0.97						2.46	0.63	2.1	0.87
1.73	0.31	1.79466	0.886118						1.8	1.13	2.51	1.26						1.74	1.2	3.48	1.2
1.55	0.97	1.52194	0.955637						1.7	1.27	1.76	0.89						2.37	0.31	2.73	0.93
2.58	1.49	2.75135	0.840067						1.27	1.33	1.52	0.75						2.99	1.49	1.44	1.09
4.3	0.38	2.96843	1.1583						1.55	2.64	1.62	1.44						1.84	1.17	2.38	1.28
2.04	1.79	2.48661	0.971384						1.05	2.28	2.32	1.59						2.08	1.65	2.24	1
1.78	0.77	2.24385	1.14327						1.48	1.53	2.64	1.17						1.99	1.2	1.59	0.87
2.64	0.81	2.42837	0.795187						1.99	0.27	2.68	1.17						2.86	0.28	2.61	1.84
1.92	1.58	1.66166	0.688987						2.97	2.1	1.38	1.31						2.07	1.2	2.84	0.68
1.98	0.76	2.0917	1.19053						1.47	0.89	1.77	1.01						2.4	0.13	2.74	1
3.39	1.26	1.68126	1.62309						2.01	0.86	1.67	0.51						1.51	0.71	1.44	0.63
2.38	0.8	2.04546	0.892984						2.45	0.88	2.26	0.91						2.58	0.47	1.56	1.16
2.67	1.41	1.52538	1.88062						2.21	1.02	2.02	0.42						2.63	0.57	3.79	0.79
2.62	1.03	3.15015	1.04865						2.99	0.71	3.04	0.81						2.39	0.19	2.13	1.18
1.82	0.68	1.86093	1.32576						1.58	2.44	1.97	0.69						2.38	1.77	2.79	1.14
2.98	1.76	2.28613	0.815815						1.55	2.36	1.57	0.74						3.1	0.64	1.63	0.72
2.59	1.96	1.85907	0.727155						2.1	0.58	1.82	0.38						1.95	1.08	2.06	1.09
1.4	0.79	2.80359	1.60754						1.39	0.56	2.2	1.06						2.86	0.36	1.69	1.19
1.39	0.96	2.49942	1.23363						2.08	0.17	1.9	1.13						1.21	0.52	2.63	1
3.87	0.86	2.50077	1.14319						2.51	0.4	3.02	1.31						2.43	0.43	1.85	0.95
2.31	0.17	1.3554	1.20901						2.16	0.74	1.36	0.66						2.73	0.43	1.64	0.61
1.5	1.32	2.1131	1.47415						2.65	0.05	1.88	0.67						1.91	3.08	2.5	1.21
2.16	0.65	2.25262	0.776355						1.83	1.74	1.23	0.5						2.9	0.2	1.91	0.96
1.54	1.59	1.34353	1.08882						2.98	1.39	2.08	1.07						1.88	2.57	2.08	1.26
1.92	2.1	2.30046	1.57167						2.91	0.25	2.38	0.9						2.1	0.93	2.64	1.1
1.32	1.05	2.18607	0.802963						2.49	0.27	3.86	0.68						3.39	0.87	2.29	0.93
1.05	1.52	2.43554	0.646285						1.72	0.56	3.62	0.7						2.69	0.31	2.82	0.81
1.69	1.54	3.03812	1.06394						1.55	1.77	1.8	1.33						1.59	1.32	3.27	1.1
2.48	0.5	2.33029	1.47302						1.37	0.9	2.78	0.96						1.56	1.19	1.92	1.34
2.45	1.29	1.66746	1.57209						1.99	0.82	1.31	1.2						1.55	1.79	2.47	0.88
1.22	0.34	1.46357	1.11838						1.94	0.92	2.5	1.04						2.29	0.69	1.79	0.92
3.06	0.42	1.57406	1.2719						2.31	0.16	1.61	1.15						3.15	1.14	2.31	1.41
1.93	1.59	1.92747	1.1675						1.29	1.34	2.27	0.75						2.93	0.43	2.56	1.22
2.42	0.65	1.70799	1.4024						1.6	1.04	2.3	1.02						1.43	0.22	2.13	1.1
1.21	0.21	2.44683	0.989696						1.86	1.78	6.06	1.1						3.68	1.13	2.36	0.85
1.18	0.33	1.71602	1.14458						2.19	0.56	1.57	0.75						2.95	0.55	1.68	1.93
1.92	1.86	1.34211	0.616825						2	1.56	2.52	0.87						1.35	0.47	2.06	1.04
1.68	1.99	1.88961	0.952032						2.43	1.51	1.95	0.57						1.98	1.26	1.68	0.93
2.4	0.53	1.80476	1.11586						2.71	0.27	1.78	0.81						3.04	0.97	2.7	1.18
1.82	1.83	1.42064	0.973341						1.89	0.84	2.53	0.94						2.07	2.05	2.26	1.46
1.13	0.57	2.8181	1.38744						2.38	0.57	2.21	1.21						1.91	1.33	1.62	0.94
1.7	0.78	1.97807	1.06153						1.87	0.89	2.22	1.16						3.84	1.07	1.79	1.02
1.59	1.38	1.8083	1.04244						2.2	0.04	2.59	1.18						4.56	2.31	1.82	1.09
2.36	1.42	1.56389	0.946232						2.41	0.8	1.42	0.85						2.28	0.97	2.07	0.9
2	1.08	1.64437	0.777531						4.11	1.27	1.6	0.93						1.94	1.2	2.05	0.8
1.62	1.51	2.3469	1.11529						2.25	0.91	1.89	0.73						1.82	1.17	1.97	1.1
1.32	1.25	1.94164	0.700912						2.77	0.13	2.25	1.01						2.4	0.68	2.15	0.8
2.95	0.14	1.84954	1.03842						2.24	0.77	2.51	1.15						2.84	0.95	2.93	1.37
1.53	1.65	1.40167	0.780314						2.44	0.15	1.83	0.95						2.87	0.22	2.6	1.06
1.65	1.43	1.71216	1.09081						2.2	1.74	1.6	1.3						1.62	0.71	2.47	0.74
1.75	1.07	1.28255	1.10053						1.65	0.88	2.71	1.04						2.9	1.05	2.3	1.05
2.44	1.24	2.46543	1.24139						2.94	1.36	3.19	0.77						3.97	1.6	1.77	1.06
2.54	0.83	1.55672	1.0884						5.02	0.63	1.92	1.25						1.89	1.56	2.13	0.74
1.39	0.11	1.93838	0.844073						2.61	0.31	2.38	1.01						3.42	1.01	2.2	0.95
2.56	0.73	1.35164	1.14177						1.31	1.28	1.77	1.16						3.36	1.37	2	0.95
2.38	1.69	1.4573	0.699857						2.59	0.46	1.91	1.5						1.79	1.82	2.25	0.9
1.34	0.18	2.1348	0.762077						6.37	0.55	2.43	1.26						1.84	0.54	2.95	0.87
2.25	1.76	2.14097	0.663365						2.08	1.12	1.87	0.73						1.55	0.89	2.2	0.97
1.48	0.44	1.79588	1.08957						1.97	0.61	1.92	0.52						1.65	1.49	1.79	0.65
1.75	1.5	1.67636	1.15219						1.59	0.84	1.64	1.19						3.48	1.94	2.38	0.82
1.59	0.22	1.79364	1.26963						2.53	0.53	2.43	0.97						2.3	1.22	2.24	0.99
2.31	0.58	2.05387	1.12932						2.97	0.55	1.8	1.01						2.33	0.2	1.92	1.22
1.49	0.13	1.8825	0.169711						2.26	0.87	2.82	1						3.08	0.17	1.94	0.94
2.56	0.85	2.08107	0.9108						2.33	0.57	2.03	0.71						4.76	0.67	1.49	1.45
2.75	0.65	1.61998	0.543258						2.95	0.57	1.57	1.06						2.27	2.11	1.81	0.77
2.74	0.89	2.17455	0.624524						2.85	0.74	2.58	1.21						2.72	1.07	2.09	1.14
1.71	0.87	2.39511	0.859328						2	2.18	1.36	1.32						2.7	1.5	1.04	1.09
2.21	0.94	2.16028	0.834226						3.08	0.36	2.87	0.91						2.11	1.14	2.23	0.68
2.42	1.08	1.49721	0.804132						1.87	1.57	1.66	1.68						2.88	0.4	1.42	0.75
2.26	1.14	1.62926	0.651964						2.01	0.4	3.37	0.69						2.52	0.56	1.55	1.38
1.55	1.1	2.08991	0.870115						2.18	0.26	2.89	0.76						1.71	1.4	1.88	1.24
2.24	2.11	2.24044	0.9101						1.88	0.76	1.63	0.7						2.07	0.43	2.43	0.92
1.3	0.3	1.99154	0.876441						1.85	0.79	2.28	1.14						1.48	1.13	1.11	1.48
2.26	1.24	1.71158	1.30655						2.71	0.59	2.01	0.96						1.22	2.35	1.71	0.83
2.29	0.55	2.20087	1.21875						1.47	2.38	2.14	1.01						2.67	0.99	2.91	1.07
1.36	0.98	1.37613	0.780955						2.59	2.64	2.38	1.12						2	0.28	3.14	1.15
1.65	0.95	4.55111	0.614226						2.29	1.25	1.35	0.82						2.62	2.68	1.61	1.04
2.25	1.49	1.27735	1.05244						4.04	1.53	1.96	0.87						3.2	1.4	2.3	1.23
1.37	0.05	2.73884	1.07669						2.41	1.14	1.81	1.02						1.6	1.43	2.82	0.95
3.29	0.14	2.47977	1.06196						2.89	0.28	2.16	0.81						1.91	0.57	1.97	0.67
3.42	0.64	1.02346	0.989887						2.91	0.15	3.12	0.98						1.5	0.74	2.25	1.11
2.27	1.51	1.68667	0.96884						2.3	0.38	2.95	1.43						3.19	1.07	2.39	1.16
2.16	1.17	1.57	1.16054						2.26	0.69	1.85	0.86						1.86	0.46	2.19	0.83
3.07	0.9	1.76988	1.08922						2.95	0.28	2.36	1.02						1.68	1.02	2.61	1.03
3.18	1.7	1.70088	0.732111						1.99	1.67	1.9	1.11						1.93	0.32	2.09	1.16
1.45	0.28	2.2084	0.805142						2.87	0.22	2.93	0.99						2.24	0.74	1.84	1.13
1.95	0.72	2.27007	0.804269						1.78	0.94	2.14	0.98						1.79	1.06	2.03	1.05
3.07	0.64	1.89466	1.03383						2.66	0.29	1.38	1.05						2.87	0.76	2.19	0.85
1.82	1.1	1.98592	0.582085						2.44	0.64	3.04	1.16						2.69	1.61	1.56	0.73
3.3	1.29	2.67942	1.21905						2.08	0.68	3.08	1.08						2.12	0.16	2.45	1.15
1.78	1.32	2.66102	0.838181						2.22	0.38	2.01	1.06						1.94	0.98	2.13	1.1
2.11	1.83	2.65531	1.62274						2.67	0.16	1.55	1.36						1.91	0.85	1.35	0.63
1.67	0.41	2.38949	1.24787						1.08	0.58	1.95	1.05						2.61	1.25	2.83	0.96
2.74	0.86	1.45411	1.35631						2.47	0.15	2.26	1.49						1.44	0.93	1.77	1.06
2.13	1.51	1.82664	0.896975						1.42	1.39	1.87	0.99						2.55	0.17	2.58	0.92
2.44	0.62	3.13967	1.04679						2.43	0.51	1.87	1.22						1.96	2.38	2.2	1.06
2.96	1.54	2.60455	0.879924						2.02	0.58	2.31	1.19						2.67	1.16	2.73	0.97
3.18	1.15	1.38616	0.790794						2.28	0.28	2.18	1.14						1.85	2.46	2.12	0.58
3.25	0.26	3.0734	1.10145						1.94	1.8	2.23	0.82						1.92	1.34	2.09	1.1
2.37	1.46	2.11329	1.25876						1.89	0.84	2.05	1.21						1.93	1.59	1.92	0.86
2.43	1.56	2.42046	0.839351						1.77	1.14	2.23	0.84						2.64	0.51	2.19	0.94
2.02	1.85	2.15947	1.09147						2.55	0.13	2.74	1.51						2.9	0.44	1.8	0.78
2.1	1.15	1.91378	0.74005						2.14	1.07	1.43	2.6						2.41	0.74	2.41	1.31
2.32	1.41	1.70185	0.942199						1.37	1.7	4.02	1.08						1.61	1.59	2.27	1.21
2.48	1.62	2.82969	1.0265						2.53	0.24	1.69	1.02						3.17	0.88	1.59	0.71
4.05	1.43	2.29631	1.43855						1.66	0.8	2.39	1.03						2.42	0.34	1.55	0.61
1.84	0.23	2.23465	0.50463						1.86	0.74	2.25	0.69						2.31	1.15	2.62	1.2
1.88	1.83	1.39576	1.14236						1.85	2.05	2.38	1.39						2.8	0.25	1.43	0.8
1.6	0.9	1.70113	0.746639						2.95	0.83	1.78	1.46						3.36	1	5.32	1.19
2.6	2.01	2.51868	0.839819						1.9	1.62	2.1	1.13						1.74	1.13	2.25	1.31
1.84	1.47	2.16446	0.896488						2.08	0.61	2.31	0.95						2.65	1.1	2.1	0.72
1.84	0.89	1.99162	1.34027						1.88	1.12	1.54	0.46						2.32	0.67	1.8	0.45
2.31	1.2	2.02507	0.700239						1.75	2.38	2.9	0.92						2.24	1.28	2.51	1.26
2.62	0.83	1.82925	2.08952						1.97	0.23	2.65	0.98						1.91	1.43	2.63	1.34
2.85	1.18	1.0808	2.38022						1.16	0.78	2.79	0.81						4.12	1.18	1.42	0.51
1.94	1.24	2.15138	1.59098						3.67	1.25	2.08	0.8						2.17	0.24	1.88	1.04
2.14	0.96	2.58372	1.4007						2.33	1.44	1.85	1.11						2.02	1.54	2.08	0.5
1.76	0.37	2.41959	1.01311						2.16	1.65	2.51	1.23						2.29	0.74	1.65	0.99
2.16	0.68	2.45466	1.95592						2.27	0.84	1.58	0.61						3.22	0.45	1.55	1.01
2.34	0.81	1.80318	1.18918						2.1	0.97	1.37	0.75						2.68	0.53	2.37	0.71
1.85	0.26	1.24049	0.718005						1.85	2.98	2.54	1.16						2.37	1.37	1.81	1.01
1.99	0.21	1.58896	0.754479						2.11	0.49	2.26	0.63						3.06	0.65	1.83	0.92
2.38	0.79	1.94369	1.2812						1.35	2.52	1.87	1.06						2.94	0.57	3.84	1.2
1.28	0.5	2.29409	0.727366						2.15	0.27	1.61	0.87						3.14	0.22	1.9	0.94
2.18	1.39	2.36336	1.11511						1.59	1.34	1.45	0.79						2.11	0.89	2.15	1.52
3.53	0.28	1.95236	1.16636						1.55	0.47	2.14	1.45						2.35	0.32	2.22	1.66
2.15	1.38	2.55606	1.15227						1.76	1.25	2.73	0.93						2.55	1.01	9.61	0.72
2.42	1.5	1.90726	1.00364						2.15	0.13	2.37	0.85						2.4	0.51	2.69	1.34
3.04	1.17	2.50306	1.1165						1.46	1.51	1.54	0.84						1.89	1.14	1.89	1
3.01	0.91	2.07314	0.961075						1.26	1	3.59	1.13						1.63	0.72	2.34	0.93
3.23	0.43	1.88707	1.44212						2.63	0.35	2.04	1.15						2.15	0.3	1.77	1.19
2.14	0.55	1.76196	1.1984						1.97	1.2	2.22	1.32						2.8	0.23	1.62	0.66
3.22	0.71	1.94698	0.611653						2.17	1.15	1.73	0.93						2.28	0.79	1.75	0.93
3.52	0.29	1.36796	0.953135						3.13	1.16	2.24	1.46						1.77	1.18	1.52	0.73
2.93	0.59	2.3191	1.12322						2.18	0.19	2.91	0.77						1.67	2.72	2.23	0.96
2.29	1.05	4.90543	0.71474						1.57	1.12	1.09	0.92						2.95	0.31	2.52	1.12
2.53	0.79	1.53201	1.18768						1.47	2.23	2.59	0.86						2.9	1.12	1.78	0.85
3.04	0.26	1.48351	1.21533						1.73	1.18	1.98	1.26						2.16	0.99	1.79	1.01
2.6	1.47	2.2219	0.79712						1.41	0.14	1.47	0.76						2.39	1.05	1.77	1.02
1.27	1.34	1.78446	0.76904						2.31	0.14	2.16	1.17						4.14	1.31	2.84	0.85
2.36	1.06	1.64056	1.38849						1.32	0.75	1.97	0.86						2.15	0.64	2.55	1.02
1.7	1.06	2.67811	1.43573						1.87	1.17	2.26	1.04						1.59	1.59	2.37	0.66
3.06	0.64	1.7101	0.934199						3	0.28	1.84	0.9						2.65	0.21	2.5	1.14
1.94	0.93	1.35415	1.40027						2.49	0.39	1.6	1.54						2.39	0.16	2.03	0.95
2.08	0.64	1.22578	0.873883						2.86	1.28	2.36	0.81						2.26	2.01	2.15	0.82
2.41	1.59	2.01579	1.07637						1.97	0.98	1.91	1.17						1.67	1.65	2.53	1.07
2	0.77	1.7453	0.963138						2.49	0.41	1.32	1.17						2.1	0.32	1.7	0.97
1.5	0.5	1.90161	0.783948						2.65	0.53	2.37	1.14						1.59	1.45	1.55	1.37
1.82	1.21	2.11364	0.898868						2.11	1.86	2.81	0.73						1.82	0.79	2.69	1.14
1.61	0.95	2.39801	0.80251						2.09	1.9	2.54	0.77						1.48	2	2.03	1.15
1.79	1.02	2.62865	0.983295						2.89	0.21	1.46	0.77						2.18	0.35	2.23	1.32
1.23	0.4	2.6518	1.65941						2.53	0.3	0.93	1.09						1.9	1.27	1.39	1.18
1.12	0.24	1.66949	1.14073						2.12	0.29	1.33	1.45						1.48	1.59	1.5	1.22
2.12	0.54	2.37593	1.42331						1.85	0.59	1.63	0.68						2.76	0.09	2.43	1.11
1.67	1.8	3.01959	0.725331						2.04	1.08	1.65	0.55						3.19	1.33	2.92	0.57
2.14	1.21	2.1496	1.04495						1.76	1.75	2.32	1.05						3.33	1.49	4.36	1.88
1.65	0.62	2.27873	0.998206						1.97	0.58	1.99	1.48						2.53	0.78	2.06	1.86
1.94	0.89	2.35703	0.971374						2.7	0.9	2.4	0.95						3.57	1.84	3.3	1.4
1.88	1.73	1.52888	0.673086						2.06	0.8	3.53	1.25						2.8	0.18	1.91	1.22
2.21	1.43	1.53539	0.335682						2.3	1.48	2.12	0.73						2.51	0.08	1.72	1.04
1.75	1.52	1.92342	1.06844						2.65	0.37	2.62	0.9						2.52	0.26	1.9	0.93
1.6	0.77	1.34524	0.576426						2.21	0.6	2.84	0.81						1.66	1.21	2.11	1.01
2.92	0.97	2.73477	1.0384						1.58	1.13	1.87	0.74						2.3	0.38	0.92	1.33
2.03	0.27	1.47372	1.47268						2.36	0.36	2.45	0.91						2.07	1.46	2.07	1.47
2.08	1.37	2.13875	1.02941						1.63	1.51	1.89	0.85						2.5	0.22	2.02	1.17
2.34	1.45	2.12212	0.795719						2.42	0.86	1.82	1.18						3.03	0.7	1.85	0.9
2.23	1.02	1.68401	1.75308						4.66	1.12	2.14	0.96						2.57	0.21	1.77	0.84
1.91	1.5	2.27116	0.999325						2.17	1.46	2.02	1.2						2.18	0.43	1.82	0.96
1.74	2.04	2.36431	1.22382						1.71	1.76	2.74	0.82						2.6	1.46	2.47	1.31
2.01	1.45	2.06993	0.654262						3.26	1.13	3.42	0.79						1.55	2.15	1.95	1.93
2.49	0.84	1.78139	0.536213						2.75	0.4	2.11	0.83						1.4	1.48	1.61	0.64
1.28	0.27	2.67333	1.24603						1.58	1.47	2.3	0.88						2.98	1.11	3.01	0.97
1.93	1.39	1.88342	0.832161						2.28	0.66	2.03	0.58						2.61	0.42	1.68	0.84
1.67	0.55	2.35744	0.918089						3.12	0.21	10.43	0.47						1.22	1.52	2.2	1.13
2.72	0.8	2.03035	1.89475						2.66	0.75	2.33	1.31						1.58	1	1.81	0.56
1.95	0.43	2.0711	1.10136						2.78	0.17	3.76	1.2						1.67	0.84	3.24	0.97
1.3	0.46	1.70907	0.647544						3.04	0.36	1.54	0.48						1.62	0.93	2.5	0.77
1.62	1.13	1.79754	0.962222						4.55	1.06	1.19	1.38						2.64	1	1.48	0.82
2.45	1.45	1.80044	0.815345						3.19	0.76	2.38	0.71						1.59	1.22	2.37	0.83
2.21	1.76	2.30133	0.771804						2.96	0.3	2.6	1.08						2.97	1.21	1.87	0.8
3.42	2.1	2.22201	1.08693						2.68	0.78	2.77	0.93						1.8	0.65	2.44	1.04
2.49	1.22	1.7733	1.32763						2.26	0.28	1.79	0.84						1.43	2.53	1.68	0.65
1.65	1	2.53491	1.11705						1.43	1.24	3.4	1.01						2.06	0.34	2.43	1.12
1.82	1.19	1.67414	1.1162						1.4	0.74	2.7	1.33						2.33	0.97	3.22	0.75
2.59	1.36	1.47873	0.950363						1.76	0.97	1.97	1.54						1.74	0.24	1.84	0.95
1.27	0.41	2.41643	0.828024						2.21	0.33	1.86	1.14						2.32	0.58	1.49	1.24
2	1.75	1.4765	0.741816						2.31	0.14	2.04	1.05						3.17	0.87	2.11	1.01
2.49	1.28	2.47372	1.26561						2.44	0.21	2.36	1.56						2.48	1.24	2.46	0.88
2.33	0.98	2.04854	0.66037						2.75	0.27	3.22	1.15						1.97	0.28	1.31	0.64
1.58	0.2	1.8295	0.406368						2.11	1.02	2.31	1.42						2.73	0.49	1.41	0.98
2.56	1.08	2.22444	1.13351						2.91	1.2	2.27	1.02						2.23	0.26	2.36	1.19
2.39	1.15	2.07303	0.954506						3.69	0.67	3.29	1.44						2.3	0.37	2.43	1.09
2.96	0.26	2.18194	1.05184						2.68	0.37	2.04	0.97						2.17	0.25	2.53	1.12
3.01	1.17	2.30353	0.703201						1.88	0.92	2.66	1.05						1.95	1.81	2.1	1.27
2.17	1.22	1.54472	1.20382						2.47	0.45	1.73	0.7						1.76	1.44	1.33	0.85
2.98	0.53	2.52145	0.915678						2.17	1.3	2.97	0.77						1.61	1.44	2.05	0.94
1.73	0.44	1.72983	0.818568						1.98	0.83	1.81	1						2.5	0.28	2.71	1.33
2.26	0.8	2.32983	0.732264						2.41	1.15	2.03	1.38						2.4	0.13	2.49	1.62
1.69	0.42	1.41915	1.4385						2.75	0.39	2.4	0.93						1.9	1.59	2.38	1.17
2.14	0.65	1.66246	0.928429						2.63	0.31	1.97	1						2.67	0.99	2.73	1.39
1.55	0.66	1.90572	0.81201						3.83	0.59	1.58	0.64						2.04	0.93	1.66	0.98
1.55	0.61	2.01706	0.860725						1.7	0.85	2.08	1.16						2.51	0.43	1.49	0.51
2.92	0.79	1.50016	1.3398						2.03	1.02	2.07	1.17						2.83	0.85	1.64	1.01
2.7	0.97	1.63424	0.87923						1.91	4.39	1.77	0.81						2.2	0.2	3.01	0.86
1.84	1.37	1.96063	0.611657						1.62	1.22	2.28	1.06						2.05	0.61	1.33	1.99
2.18	0.87	2.09213	0.768165						2.44	0.49	1.81	0.98						1.91	0.47	2.29	0.78
2.71	1.55	1.76944	0.902965						4	1.71	2.66	1						1.77	1.5	1.25	0.65
2.62	2.36	2.43255	1.52668						2.42	0.13	1.87	0.7						1.19	0.94	1.37	0.53
1.83	1.2	2.18807	1.03218						1.84	1.61	4.17	0.83						1.77	1.25	2.82	1.49
2.17	1.15	1.69156	1.08167						2.49	0.06	2.16	0.93						1.58	1.76	2.95	0.95
2.66	0.21	1.38156	1.10373						3	0.36	2.23	1.19						2.56	0.4	1.51	0.83
4.54	1.36	1.55573	0.909137						2.95	1.25	1.71	0.69						1.91	1.35	1.52	0.97
1.8	1.3	2.7743	0.965255						1.65	1.46	2.6	0.92						2.5	0.23	2.45	1
3.1	1.51	1.59861	1.40625						3.54	0.55	2.67	1.17						1.79	0.75	1.53	0.77
1.98	0.98	2.1053	0.893508						2.82	0.27	1.76	1.12						2.58	0.33	2.04	0.64
2.71	1.15	1.24755	1.14695						2.39	0.19	3.08	1.06						2.27	0.9	1.96	0.74
2.41	0.74	1.57433	0.856045						1.4	0.6	1.67	0.86						2.27	0.15	1.33	0.76
2.97	0.66	1.42105	1.09687						2.48	1.34	1.4	1.02						2.11	1.34	2.63	0.92
2.02	1.1	1.42012	0.69801						3.04	0.41	1.57	1						1.8	2.26	3.86	1.16
2.56	1.95	2.09765	1.03848						1.99	1.85	2.13	1						2.28	0.24	2.17	0.95
2.76	0.9	1.61724	1.05898						2.02	1.86	1.99	1.01						1.81	0.69	1.47	1.09
3.15	0.39	1.67394	0.819442						2.65	0.11	2.27	0.95						1.28	0.42	1.91	0.9
1.83	1.14	2.80004	1.25991						1.87	1.28	2.26	1.03						2.83	0.41	2.42	0.73
1.75	1.11	1.44236	0.976544						2.85	0.12	2.27	1.84						2.56	0.47	2.48	0.73
2.81	1.09	2.3206	0.873535						1.11	0.55	2.71	0.98						3.33	2.05	2.52	0.75
3.22	0.79	1.59291	1.42975						1.73	0.21	2.5	1.19						2.64	1.03	3.26	0.96
2.28	1.91	2.05945	1.27103						1.36	1.82	2.67	1.5						1.87	2.04	2.27	0.81
1.2	1.44	1.56703	1.02821						1.47	1.92	2.43	1.46						1.54	2.77	1.85	0.97
3.56	0.24	2.22801	1.12498						1.95	0.97	2.11	1.33						2.12	2.22	1.76	0.88
1.64	0.45	1.6945	0.485169						1.94	0.28	2.62	1.27						1.94	0.67	2.24	1.55
1.91	1.38	2.63811	1.2154						2.01	0.72	2.15	0.77						1.86	1.08	2.66	0.85
3.94	0.18	2.12122	0.914103						2.26	0.12	2.22	0.98						2.21	0.29	2.38	0.12
2.25	1.03	3.19355	1.04546						1.71	0.76	2.42	0.81						2.77	0.46	1.6	0.83
3.09	1.94	1.03557	0.986326						2.84	0.88	1.91	1.25						3.13	2.02	2.26	1.07
2.59	1.38	1.74299	1.51176						1.48	1.31	2.2	1.16						1.62	2.64	2.24	1.08
3.6	0.06	2.04758	0.594845						2.12	0.27	1.78	0.94						2.61	0.31	2.3	1
2.9	1.12	3.36142	0.894642						2.47	0.43	1.88	0.79						3.37	0.39	2.27	0.9
1.99	0.97	2.30192	1.33615						1.65	1.21	3.29	0.78						2.11	0.97	2.19	1.27
1.89	1.57	2.31371	0.984053						1.81	1.35	1.09	0.71						1.93	1.48	2.64	1.2
1.14	0.11	1.75669	1.01697						1.57	1.67	1.92	1.35						2.37	0.45	2.84	1.07
2.69	0.42	2.1382	2.18341						4.17	2.18	1.58	1.4						2.82	0.14	2.93	1.01
1.37	1.07	2.16287	1.14973						2.14	1.44	1.98	0.96						2.94	1.33	2.64	1.09
1.48	1.49	1.08474	0.458502						2.15	1.06	2.47	1.69						2.18	0.67	2.77	1.17
1.64	1.35	2.29334	0.830575						2.88	0.16	2.94	1.11						2.67	1	2.09	0.61
2.13	0.32	1.72347	1.7965						2.59	0.54	2.54	1.53						2.79	0.44	1.85	1.29
1.89	0.35	1.94514	1.16624						2.17	0.6	1.51	0.8						2.14	0.58	1.75	1.13
1.62	1.29	3.47285	0.996193						3.15	0.92	3.6	1.45						1.67	0.94	2.13	0.94
1.52	1.32	2.56858	1.26306						3.09	0.93	2.56	1.36						1.71	1.04	2.28	0.83
1.89	1.03	1.5118	1.56491						2.5	0.23	1.82	0.96						1.8	1.57	1.9	0.9
1.72	1.2	2.8502	1.09777						1.92	0.6	2.5	1.14						2.86	0.31	1.83	0.89
2.31	0.99	1.58007	1.2728						2.19	1.14	2.72	1.16						1.93	1.62	2.54	1.12
2.05	0.56	1.85397	0.888894						3.07	0.32	1.14	0.93						1.92	1.12	2.52	1.01
1.4	0.38	2.031	0.639115						2.22	1.12	2.46	1.02						2.31	0.48	2.39	1.4
1.67	1.06	2.65147	2.08307						1.33	0.17	2.75	0.93						2.52	1.01	2	0.98
2.17	0.99	2.47289	1.15789						2.18	0.54	2.09	0.9						2.02	2.56	2.98	1.21
1.56	1.18	2.28021	1.23684						3.69	1.07	2.59	1.16						2.37	0.89	2.47	1.03
1.35	1.1	1.6223	0.879778						2.28	0.51	2.03	1.29						2.13	0.88	2.03	0.66
2.12	0.97	1.79121	0.79411						2.2	0.63	1.7	0.89						2.54	1.08	1.37	0.98
1.59	0.99	1.63751	1.52303						4.16	27.8	2.53	0.87						2.68	0.39	2.48	1.34
1.63	1.32	1.9904	1.40586						1.89	1.31	2.39	1						2.81	2.22	2.65	1.05
1.43	0.96	1.97292	1.18001						3.52	0.95	2.37	1.22						2.36	0.87	2.6	0.72
2.81	1.19	2.02313	1.29919						2.18	0.81	2.66	1.19						1.32	2.32	2.57	1.21
2.2	1.18	1.43892	1.06389						2.97	0.25	2.51	1.06						2.32	0.65	2.93	0.8
2.13	1.52	2.14732	1.17765						2.82	1.34	1.57	0.62						1.73	1.44	1.39	0.69
1.3	0.53	2.61449	0.976748						2.61	0.19	2.15	0.84						0.91	1.76	2.07	1.32
1.11	2.2	1.81099	0.971053						2.33	0.78	2.02	1.53						1.49	0.97	1.65	0.88
1.85	1.39	1.61712	1.07074						3.67	0.84	1.97	0.91						2.24	0.52	1.46	0.76
2.85	0.92	1.47546	1.4484						3.13	0.92	2.01	0.65						2.03	0.47	1.41	1.23
1.93	1.1	1.68279	0.854458						2.37	1.43	2.19	1.21						1.53	0.72	1.59	1.12
1.8	0.85	2.30106	1.1015						3.59	0.46	1.72	1.07						4.02	0.64	1.76	0.57
6.56	0.93	1.63282	1.58166						2.39	1.14	2.49	1.13						2.4	1.37	2.44	0.75
1.87	2.17	2.80468	1.09025						2.3	0.71	2	0.6						2.36	0.96	2.68	1.25
1.68	0.61	1.30213	1.10099						4.33	1.45	2.22	0.89						1.74	0.54	2.94	0.92
3.11	1.05	2.97568	0.691788						3.07	1.02	2.73	1.17						1.91	0.21	1.96	0.94
2.44	1.23	1.59686	1.15394						2.48	1.33	2.7	0.66						2.16	0.29	2.13	1.38
2.25	0.38	1.55085	0.867632						1.87	0.26	2.84	0.93						1.88	1.55	2.32	1.4
2.5	1.1	1.94147	1.07348						1.73	1.47	2.27	1.02						1.55	0.97	2.28	1.17
2.4	1.88	1.85382	0.739514						1.56	0.76	2.57	0.74						1.76	0.78	2.45	1.09
2.24	1.36	1.20254	1.3264						1.65	1.28	2.07	1.03						1.62	0.28	1.38	1.21
1.61	1.06	2.89364	0.857224						2.03	0.64	1.52	0.58						2.24	2.05	1.73	0.88
1.37	1.13	2.87439	0.756136						3.11	0.72	1.96	0.8						2.73	1.28	3.03	1.04
1.33	0.85	1.59522	1.39876						1.91	1.13	2.5	0.78						1.75	1.36	1.96	0.68
1.89	0.36	2.3184	1.09364						1.84	0.88	1.73	0.85						1.96	0.83	1.55	0.85
2.25	1.66	1.59362	1.14753						1.79	2.73	2.45	0.9						1.74	1.7	1.63	0.92
1.63	0.91	1.65725	1.05577						2.62	0.79	1.62	1.1						3.19	0.66	2.28	1.33
1.65	0.75	2.78268	1.05231						2.48	0.98	2.18	0.72						2.59	0.53	1.96	0.87
2.77	1.03	1.39767	0.693007						1.8	0.73	2.22	0.91						2.12	0.15	2.25	1.02
2.56	1.09	2.31112	0.867329						1.7	0.82	2.5	0.65						2.33	0.47	1.9	1.46
1.22	0.85	1.31706	0.915888						2	0.73	4.64	1.39						1.78	0.87	1.57	0.64
1.63	1.01	1.8129	0.648308						2.27	0.34	1.06	0.48						1.9	2.21	2.23	0.79
2.91	0.08	1.98528	1.1491						1.86	0.64	2.1	0.66						1.67	1.64	2.79	1.08
2.41	0.79	1.75191	0.805065						1.98	0.63	2.07	1.44						2.84	0.86	2.19	0.74
1.68	0.49	1.61144	1.41579						2.13	0.77	2.55	0.69						1.63	0.76	1.94	0.53
2.76	0.5	1.37979	0.716371						2.5	1.2	2.63	1.19						2.2	0.55	2.75	0.92
2.99	0.82	2.67788	1.23891						3.35	1.14	2.47	1.76						2.6	0.95	2.1	0.7
2.75	0.99	2.15536	0.893129						1.54	2.14	1.5	0.74						1.74	1.82	2.42	1.27
1.49	0.31	1.39826	0.775018						2.41	0.24	2	0.96						2.45	0.5	1.37	1.46
2.64	2.1	2.72079	0.608686						2.8	0.36	1.33	0.97						2.09	0.34	2.62	1.49
2.71	1.18	1.66456	1.79121						1.95	0.62	1.75	1.01						2.05	0.74	1.79	1.22
2.62	0.84	1.45821	0.940328						1.55	0.95	2.55	1.12						2.26	0.42	1.39	0.69
2.28	0.35	1.40954	0.921354						1.79	1.17	2.38	1.03						2.63	0.95	2.12	1.05
2.32	0.98	1.47539	0.734742						2.4	0.24	1.56	1.59						1.23	0.51	2.45	0.98
2.19	1.42	2.29071	0.812235						2.2	1.18	3.36	0.48						1.52	0.4	1.95	0.74
2.48	1.34	2.28027	0.804228						2.03	0.44	2.01	0.78						1.31	1.95	1.78	1.18
1.56	2.1	2.37275	1.01336						1.74	0.89	1.4	0.43						2.52	0.59	2.66	1.02
2.55	0.76	2.05395	0.787368						1.67	1.49	2.57	0.83						2.35	0.41	2.67	1.1
2.72	0.74	1.49602	1.34373						2.26	0.92	2.13	0.76						1.56	1.15	2.75	0.81
3.53	0.59	2.25278	0.921482						2.81	0.08	1.31	0.58						1.81	1.09	2.59	0.9
2.53	2.03	2.06569	1.25857						2.27	0.9	2.49	1.09						3	0.78	2.87	1.02
5.11	1.05	2.37197	1.2637						2.04	0.98	2	1.33						2.65	0.25	2.08	0.9
3.1	1.12	3.36416	0.967098						2.72	0.36	1.49	0.62						1.9	1.52	2.43	1.12
3.04	0.81	2.01223	0.513006						2.57	0.63	2.12	1						1.79	1.01	1.64	0.78
2.12	1.13	2.47988	0.67053						2.77	0.25	1.92	0.93						2.05	3.22	3.65	0.67
1.23	0.92	2.5002	0.937128						2.51	0.26	1.95	1.1						2.3	0.31	2.2	0.97
1.91	1.68	3.0036	0.873121						2.53	0.48	2.46	1.4						2.82	0.32	2.01	0.97
2.44	0.41	2.45462	0.778728						1.66	0.45	1.64	0.67						2.03	1.09	1.92	0.81
2.91	0.99	1.91612	1.80531						2.2	4.95	1.89	0.9						2.38	1.36	1.76	1.19
1.78	0.92	2.10702	0.625823						2.5	0.26	2.47	0.9						5.33	0.88	1.95	1.12
2.4	0.02	2.68072	0.8968						2.35	1.43	1.94	0.88						1.75	2.4	2.58	0.71
1.48	1.57	1.93653	1.05243						2.3	0.44	2.32	0.77						2.84	0.29	2.45	0.89
2.08	1.32	1.70562	1.16548						1.38	0.23	2.66	1.44						2.9	0.32	2.2	1.3
1.84	1.96	2.58914	1.05372						2.65	0.32	1.5	0.93						2.2	1.38	3.06	1.01
2.1	1.05	2.30988	0.996909						2.49	0.14	1.44	1.74						1.61	1.31	1.86	0.82
1.25	1.01	2.044	0.946652						2.39	0.13	2.04	1.05						3.2	0.74	2.75	1.31
2.65	0.38	1.52531	1.93471						2.05	0.99	2.63	0.79						2.39	0.22	1.98	0.84
2.32	1.13	2.07504	1.43073						1.93	1	2.2	1.04						2.36	0.25	1.9	1.14
1.82	1.33	2.27546	0.691311						2.68	0.55	2.36	1.6						2.16	0.86	1.9	1.15
2.38	0.11	1.41539	0.875602						3.08	0.16	2.15	0.87						1.86	1.73	2.84	1.06
2.23	1.25	1.58087	1.31121						3.43	0.78	1.49	0.72						2.13	1.34	1.86	1.02
2.01	1.58	2.8675	0.868471						4.1	0.42	2.76	1.25						2.3	1.26	1.86	0.58
1.46	0.47	1.91412	0.948378						2.36	1.68	2.6	0.62						1.37	2.35	2.01	0.78
1.2	0.36	1.96616	1.32743						3.43	1.39	1.27	0.52						2.34	0.41	1.94	0.94
2.3	1.84	2.47741	1.06896						3.24	0.43	2.16	0.91						2.8	0.29	1.92	0.96
2.72	2.11	1.90714	0.913424						2.55	0.9	1.62	0.89						1.96	0.99	2.41	1.14
1.38	0.23	1.53183	0.935814						2.95	0.36	2.09	0.94						1.98	0.98	2.24	1.44
1.88	1.82	1.29569	0.577849						2.39	0.75	1.7	1.04						2.82	0.79	2.46	1.02
1.52	2.23	2.25371	0.965313						2.72	0.33	1.88	0.57						2.77	0.92	2.04	1.11
1.74	0.98	2.22177	1.07353						1.75	1.16	2.23	1.74						1.89	0.88	2.93	0.73
2.26	1.04	2.06152	0.857017						2.3	1.3	2.29	0.99						2.81	0.26	1.79	1.78
2.72	1.09	1.93427	0.925309						2.3	1.34	1.37	0.98						2.46	0.37	1.41	0.99
1.72	1.02	1.39999	0.796534						3.84	1.6	2.19	1.07						2.82	0.23	5.34	1.11
2.8	0.62	1.84914	0.919717						2.14	1.66	1.96	1.49						3.85	0.81	3.84	0.96
3.06	0.26	2.21508	0.886629						2.72	0.39	1.77	0.99						2.16	0.1	2.29	1.15
1.79	1.28	2.61893	0.939836						2.75	0.47	2.19	0.77						1.58	0.98	2.53	0.67
2.94	1.16	2.67318	0.838135						1.29	0.54	1.67	0.88						2.88	0.46	2.18	1.28
1.52	0.58	3.11046	0.843488						1.74	1.4	1.83	0.83						3.34	0.23	2.12	1.2
1.95	1.31	2.31621	0.724803						2.67	0.37	2.4	1.17						2.98	1.04	1.76	0.97
1.59	1.03	1.63305	0.729005						2.45	0.27	3.42	1						1.93	0.6	1.87	0.89
1.69	0.19	1.8567	0.671222						1.99	1.11	1.89	0.82						2.39	1.27	2.54	0.89
2.69	1.91	2.08099	0.960223						1.94	0.53	4.14	1.79						1.28	0.29	2.2	1.04
1.58	0.68	1.64083	0.88037						2.14	1.49	1.17	0.89						1.86	0.52	2.93	0.79
1.49	0.2	1.72922	1.00028						3.15	0.1	1.79	0.8						2.52	0.93	2.46	0.73
1.78	1.34	1.7165	1.45331						3.59	0.45	2.27	0.75						2.54	1.25	2.4	1.25
1.14	0.95	1.35996	0.911203						2.56	0.82	2.2	1.31						2.32	0.28	2.52	1.22
2.19	0.92	2.79618	0.847122						2.28	1.29	2.01	1						1.59	1.5	1.8	0.59
2.51	1.6	1.88768	0.745957						1.68	1.69	1.72	0.84						2.18	0.2	1.94	0.84
1.66	0.88	2.4512	0.843719						2.19	1.09	2.75	0.96						2.31	0.63	1.73	1.1
2.65	0.96	4.03444	0.911461						2.7	1.48	3.26	0.85						2.12	0.39	2.17	1.14
2.34	1.02	2.58647	0.778581						1.29	0.94	2.74	1.12						1.42	1.08	2.48	0.75
3.17	0.16	4.77732	0.966424						1.3	1.75	2.16	0.93						2.24	0.55	1.54	0.42
2.7	1.11	2.93632	1.22383						2.28	0.47	1.89	1.08						1.58	1.46	2.69	0.62
1.8	0.31	1.27901	0.844046						1.46	1.99	1.86	0.96						1.42	0.7	1	1.14
3.14	0.26	1.82482	1.87543						2.31	0.72	2.69	0.83						1.98	0.53	1.49	0.66
2.4	2.02	1.87014	1.04595						1.67	0.71	1.64	1.08						2	1.66	1.51	2.1
1.99	1.42	1.23603	1.04498						1.68	1.02	1.42	1.03						2.12	1.01	2.34	1.11
1.43	0.57	1.69622	0.906156						1.7	1.92	1.3	0.59						2.84	1.45	2.62	1.11
1.91	0.76	2.362	0.81113						1.59	1.8	1.6	0.89						2.19	0.18	2.26	1.69
3.17	1.75	2.75196	1.27482						1.69	0.81	1.56	0.72						1.39	1.72	2.34	0.73
2.7	0.95	2.44884	0.606145						2.17	0.14	1.53	0.8						4.35	0.8	1.67	1.3
2.44	1.5	1.71292	0.71127						1.36	2.55	2.33	0.67						2.14	0.38	1.84	1.13
3.64	0.3	2.49741	1.44053						1.87	1.26	1.98	0.64						1.81	0.36	1.91	0.87
3.76	0.7	1.5952	0.62186						2.44	0.21	2.43	0.9						1.51	1.7	2.12	0.96
2.11	1.63	1.78461	0.67139						1.89	1.54	2.11	0.72						3.15	0.72	2.72	1.15
1.6	0.57	2.07015	1.01984						2.16	1.51	3.49	0.71						3.98	0.31	1.84	1.08
2.97	0.99	1.47654	0.747452						3.98	0.87	2.03	0.74						1.37	2.98	1.88	1.07
1.77	1.15	1.75862	0.890156						1.84	0.62	1.49	0.77						2.41	0.55	2	1.01
3.36	0.1	2.36386	0.847207						1.98	2.04	2.9	1.15						1.93	1.3	2.01	0.79
1.63	0.25	1.68224	1.01315						1.76	0.81	2.16	0.62						1.83	1.56	1.82	0.58
1.63	0.51	3.0586	0.841698						1.7	1.27	1.41	0.55						1.77	1.26	2.98	1.03
3.18	0.28	1.44166	1.02449						2.99	0.43	1.66	1.24						2.22	0.2	1.99	1.14
3.01	1.76	2.74535	1.24097						2.72	0.15	2.03	0.94						2.46	0.14	2.28	1.33
1.91	1.78	1.51357	1.86387						3.17	1.22	1.4	1.07						2.04	0.6	1.3	1.07
2.19	0.52	2.32069	1.12954						1.62	1.26	2.71	0.69						2.75	1.53	1.58	0.79
3.16	0.25	2.07717	0.569405						3.24	1.82	2.36	0.94						1.95	1.21	2.63	0.72
2.41	0.91	1.92548	0.618191						1.83	1.5	2.12	0.88						2.72	1.42	1.51	0.54
1.97	1.78	1.78184	0.933494						2.36	0.63	1.97	0.97						1.56	1.12	1.85	0.53
1.71	0.16	2.04153	1.12452						2.4	0.1	2.65	1.33						1.45	0.15	2.9	1.12
2.66	0.96	2.73744	1.39262						3.18	0.42	1.79	1.37						1.8	0.87	2.14	1
3.54	0.15	2.13825	1.0013						1.58	1.21	2.14	0.9						2.75	0.12	2.53	0.99
2.25	1.22	2.80866	1.46749						1.84	0.94	1.58	1.25						1.28	1.02	1.26	0.6
1.38	0.61	2.21388	0.796479						2.03	3.82	1.93	1.03						2.91	0.4	2.1	0.77
3.03	1.6	1.73701	1.10193						2.96	1.12	2.71	1.17						1.68	2.02	1.85	1.44
2.22	1.78	1.46595	1.49386						3.42	0.55	1.48	0.75						2.24	0.2	2.75	1.17
2	0.47	1.89364	1.24437						2.35	0.22	1.77	1.23						2.63	0.36	2.79	0.86
1.06	0.76	1.88161	0.412878						1.92	1.71	1.15	1.21						1.65	1.95	2.53	1.24
2.49	1.42	2.23172	1.20388						1.7	2.41	1.84	1.12						2.5	0.24	2.52	0.8
2.04	1.14	2.33727	0.855855						2.21	0.87	2.38	0.89						1.86	1.78	2.08	0.96
3.26	0.94	1.79906	1.02606						3.63	1	2.02	1.63						1.91	1.13	2.09	0.86
1.85	1.33	1.76655	1.21591						1.8	0.93	2.29	1.14						2.26	0.62	2.06	0.78
2.74	1.34	3.27617	0.528187						1.53	4.45	2.97	0.91						3.03	1.78	2.14	1.02
2.53	0.87	1.86266	0.988403						3.18	1.72	2.84	1.36						1.54	0.59	2.09	1
1.68	0.35	1.66357	1.10486						2.75	0.91	2.19	1.01						2.33	0.42	1.55	1.51
2.3	0.68	2.06895	1.03157						1.79	1.68	1.55	0.75						3.31	1.21	1.47	1.07
1.83	0.76	1.50396	1.85691						2.14	0.82	3.14	1.12						1.95	1.24	2.39	0.76
3.59	0.58	2.4069	1.22811						1.83	1.78	2.16	1.18						2.71	0.79	2.84	0.97
1.96	0.43	1.63539	0.697769						2.07	1.31	2.61	0.99						1.59	0.52	1.79	0.76
1.43	0.93	2.27444	1.24565						3.18	0.27	2.05	1.13						2.82	0.17	2.46	0.88
1.78	0.96	1.96704	0.655256						1.94	1.86	1.82	1.03						1.98	1.49	1.82	0.62
2.71	1.22	1.53498	0.935106						2.12	1.75	1.9	0.78						2.56	0.18	1.74	1.25
2.58	1.9	2.29475	0.924639						1.63	0.82	2.67	0.81						3.59	1.32	1.91	0.96
2.73	1.14	1.92422	1.02915						2.3	0.96	1.73	0.53						3.26	1.24	3.83	1.1
1.53	1.76	2.82532	1.3832						1.83	0.69	2.37	2.45						1.68	2.12	2.28	0.96
1.4	0.92	2.69228	0.849553						1.99	2.03	2.44	0.64						1.6	1.26	1.68	1.02
1.38	0.38	2.83243	1.4442						2.69	0.69	2.93	1.02						2.21	0.6	2.77	1.53
2.02	0.9	1.56128	0.773142						2.37	0.07	2.21	1.35						3.19	0.13	2.15	1.71
1.19	1.59	2.07169	0.820423						3	0.51	1.82	1.44						2.38	2.72	1.81	1.23
1.66	1.41	2.30129	0.714269						3.27	0.53	2.98	1.02						2.53	0.84	2.24	0.84
1.33	0.25	1.43084	1.31898						3.09	0.74	1.9	1.01						1.8	1.58	1.73	0.58
1.39	0.8	2.04743	0.861007						2.15	1.06	2.15	0.8						3.57	1.04	1.55	0.59
1.53	0.93	1.903	0.765782						1.88	1.6	2.54	1						2.37	0.45	2.87	1.06
1.03	1.35	1.34889	1.04303						2.53	0.11	2.41	0.76						2.26	0.43	2	0.79
1.64	0.59	1.62947	0.616552						3.28	1.02	2.05	0.99						3.21	2.1	1.98	0.93
2.05	2.26	1.82513	1.2451						2.12	1.7	3	1.25						3.37	0.26	2.15	1.42
1.49	1.56	1.47302	0.996491						2.81	0.77	1.48	0.77						2.39	1.15	2.18	1.27
2.21	1.58	1.69379	1.43936						2.47	2.38	2.15	0.79						2.14	1.07	2.45	0.95
1.29	0.18	1.83746	0.654989						2.37	1.62	1.42	0.98						2.45	1.32	2.53	0.72
2.56	0.6	2.37001	0.780473						3.18	0.29	3.61	1.02						1.86	2.03	1.61	0.83
2.23	0.87	2.7285	0.870041						3.35	1.34	2.8	1.02						3.28	1.34	2.64	1.32
2.16	2.13	1.74658	1.00715						3.27	0.49	2	1.79						2.74	0.27	2.1	0.88
1.71	0.8	1.85462	0.652445						2.83	0.14	3.22	0.77						2.47	0.98	1.86	0.87
1.31	11.94	2.45814	0.882708						2.64	0.89	2.04	0.86						2.17	2.12	1.94	0.87
1.76	1.37	1.36838	1.36502						3.05	1.69	2.2	0.67						3.13	0.2	1.85	1.26
1.98	0.19	2.6813	1.1751						2.73	1.13	2.56	0.92						3.24	1.93	1.93	0.76
2.34	1.58	1.52588	1.20965						1.56	0.67	2.44	1.27						1.58	1.04	2.81	0.93
1.48	0.83	1.42643	0.50405						3.12	0.97	2.27	1.14						2.84	0.54	1.97	0.75
2.11	0.85	2.58529	1.29687						2.13	1.35	2.47	0.81						3.2	0.18	1.41	1.34
1.69	1.31	2.05019	0.712434						3.11	0.45	1.97	0.6						4.53	1.13	1.62	1.24
2.21	1.33	2.41353	0.969274						1.11	0.3	2.06	0.69						2.56	0.14	1.64	0.77
1.45	0.46	1.9972	1.18318						1.9	0.29	1.58	0.81						2.59	1.92	1.2	2.7
1.87	1.34	1.72626	1.22235						1.85	1.99	2.24	1.1						1.43	1.02	2.01	0.97
2.26	1.32	2.62909	0.949228						1.82	1.5	1.82	0.8						2.22	1.03	1.47	0.83
2.95	0.24	2.31897	0.867563						1.49	1.01	1.99	0.67						2.85	0.61	1.78	1.22
1.57	0.71	2.76956	0.871646						2.34	0.45	2.64	0.79						1.84	0.35	2.59	1.15
1.52	0.42	1.64164	1.36516						2.12	0.46	1.66	0.83						2.14	0.39	2.52	1.23
3.02	1.65	1.47318	1.63921						2.32	0.15	1.87	0.81						2.09	0.51	2.23	1.06
2.45	1.31	2.64151	1.08068						1.39	0.89	2.54	1.05						1.58	1.18	1.89	0.58
1.96	1.45	1.49259	0.924951						1.9	1.23	1.59	1.04						1.65	0.2	1.93	1.04
2.71	1.95	2.24584	0.960911						2.53	0.17	2.37	1.11						1.15	2.09	2.22	0.87
1.31	1.52	1.62054	1.15892						2.91	0.98	2.07	1.18						1.63	0.49	1.04	1.08
1.89	1.4	2.2215	0.921865						1.42	1.2	2.95	0.7						2.72	1.54	2.34	0.98
2.5	1.36	1.61886	1.0279						2.37	0.18	1.78	0.68						1.85	0.17	2.42	0.91
2.6	0.68	2.42268	0.609552						1.87	0.6	2.48	0.98						1.76	1.08	1.63	1.61
1.95	1.03	1.44981	0.929799						1.83	2.07	2.14	0.9						1.05	1.78	1.9	1.29
2.28	1.23	2.49143	0.73801						1.85	0.53	2.61	1.8						2.66	1.35	2.04	1.12
2.83	0.39	2.51351	0.884187						2.31	1.32	1.91	1.16						1.23	1.13	1.67	1.27
1.24	1.65	2.20781	1.01284						1.89	0.75	2.81	0.6						2.21	0.74	2.99	1.04
2.2	0.6	1.60217	0.889488						1.91	0.58	1.4	1						1.85	0.81	2.09	1.11
3.33	0.49	1.78728	1.0052						1.44	1.21	1.61	1.35						2.44	0.2	2.76	1.02
1.96	0.25	1.90134	0.84428						1.39	0.87	2.19	1.12						1.42	1.58	2.6	0.77
2.93	1.14	2.54826	0.767998						1.91	1.07	1.92	0.84						1.65	0.63	2.39	0.92
1.99	1.21	1.31791	0.915103						1.96	0.91	1.98	1.33						1.94	1.06	1.79	0.97
1.92	1.91	5.80203	3.49741						2.17	0.26	2.42	1.03						2.49	0.41	1.94	1.06
3.57	1.14	1.64431	1.19896						1.74	0.95	1.73	1						1.27	2.59	3.14	0.61
2.6	1.34	1.47144	0.973767						1.94	0.92	1.85	0.74						2.36	0.74	2.91	0.86
3.26	0.83	1.80303	1.77072						2.53	1.3	1.61	1.07						1.98	2.42	1.72	0.57
3.73	0.89	2.58198	1.05927						2.38	0.22	1.94	0.88						2.59	0.26	3	0.88
1.47	0.79	2.00706	0.867898						2.33	1.15	2.21	0.91						1.93	1.22	2.54	1.08
3.69	0.33	2.22008	1.25125						1.88	1.45	1.73	1.24						1.86	1.15	2.62	1.04
2.65	0.54	2.4368	0.920296						1.74	1.11	2.4	1.16						2.43	0.58	1.74	1.42
1.39	0.51	1.96444	1.19619						1.94	2.07	2.11	0.57						1.13	0.1	2.38	0.85
1.57	0.2	2.26346	1.1118						2.09	1.39	1.47	0.85						2.58	0.33	1.9	1.31
1.84	0.38	2.07714	0.709677						2.43	0.63	2	0.99						2.77	0.55	2.45	1.04
3.23	0.46	1.64866	0.82694						1.51	1.87	2.25	0.67						3.4	0.76	2.47	1.17
3.65	0.64	2.15622	1.07419						1.88	1.37	1.57	1.06						1.66	2.09	1.95	1.36
2.24	0.93	1.33198	1.27573						1.98	1.77	2.51	0.89						1.98	0.54	1.73	0.72
2.98	1.63	2.82802	0.946461						3.27	2.93	2.9	1.51						2.13	0.11	1.54	0.97
2.84	1.3	1.36057	0.906892						3.28	0.4	1.66	0.51						1.09	1.17	2.28	1.43
2.86	1.34	1.94294	0.685392						1.65	1.47	2.37	0.97						2.47	0.86	2.41	1.45
1.34	0.46	2.08926	0.7006						1.31	0.06	1.77	1.03						1.52	0.97	2.09	1.02
1.94	0.21	1.29909	1.34885						2.12	0.93	2.45	1.18						1.42	0.79	2.06	0.69
2.67	1.43	2.04995	0.878689						3.51	0.62	1.78	2.14						2.88	2.18	2.13	0.73
1.93	0.94	1.69878	0.933023						2.49	0.54	2.19	1.75						1.9	0.66	1.64	1.06
1.72	0.62	2.45201	1.24418						2.96	0.41	2.06	0.71						2.06	1.32	2.3	0.83
1.85	0.08	1.92273	0.729471						2.9	0.14	2	1.21						2.28	0.55	1.96	0.93
3.11	1.77	1.50813	0.803392						2.53	1.26	2.5	2.88						1.68	1.65	2.57	0.86
2.3	1.83	2.14655	0.60328						2.58	0.87	1.79	0.7						1.64	1.84	2.27	0.96
2.86	0.66	2.0908	0.791112						2.21	0.55	2.3	1.17						1.17	0.83	2.49	1.22
2.25	1.39	2.61307	1.21604						2	0.43	2.33	0.83						1.7	1.11	1.49	0.9
2.05	0.55	2.05291	1.72237						1.73	1.67	2.29	1.06						3.13	0.41	1.69	0.75
1.75	0.74	1.93485	0.658653						3.06	0.27	2.53	1.08						2.12	1.13	1.88	1.31
2.11	0.37	1.9507	0.714073						1.91	0.67	1.61	1.04						1.55	1.71	1.93	0.68
2.31	1.08	2.71512	0.886729						2.64	0.35	1.78	0.59						2.44	0.67	2.11	0.71
1.22	0.32	2.00419	0.60888						2.24	0.47	2.48	0.97						2.51	1.55	2.56	1.33
2.14	0.99	2.02269	1.23457						1.62	9.54	3.52	1.44						2.21	1.16	2.57	1.82
1.8	1.48	2.55865	1.04842						2.9	0.21	2.12	0.76						2.04	0.32	2.1	0.96
0.97	1.62	2.26657	1.27411						3.68	1.58	2.04	0.81						1.4	1.42	2.06	0.74
1.57	1.31	1.72511	0.713535						4.03	2.04	1.87	0.56						1.98	2.55	2.16	1.24
1.23	0.62	1.78368	0.812993						2.54	1.03	2.91	0.98						3.75	1.37	1.87	0.91
2.34	1.03	1.96605	0.751678						7.47	1.05	2.12	1						3.19	1.17	2.04	0.94
1.14	0.09	2.18788	0.345371						2.29	0.63	2.22	0.72						3.15	0.98	2.79	1.13
1.96	0.92	1.91537	1.10743						2.09	0.78	1.25	1.09						2.31	1.05	1.75	0.45
2.34	1.03	2.72537	1.01782						2.72	1.15	2.76	1.36						1.99	1.02	2.55	0.73
1.93	1.34	3.36153	1.31645						3.04	1.11	3.2	0.91						1.6	1.11	1.78	0.63
1.41	1.11	1.65918	0.861471						2.73	0.22	1.39	0.46						3.61	1.08	1.77	1.06
1.29	0.68	1.70557	0.697115						2.53	0.37	1.48	0.4						2.12	0.17	3.1	0.91
2.12	0.56	2.17825	0.772654						3.54	1.59	1.47	0.89						3.67	1.99	1.32	1.8
1.34	0.34	1.78115	0.793879						1.86	0.24	3.37	1.17						2.11	0.82	1.76	0.76
2.04	0.77	1.98847	1.35095						1.73	1.22	2.76	0.97						2.15	0.28	2.51	1.13
2.31	0.67	2.23898	3.92999						3.16	1.34	3.06	0.85						1.87	1.48	3.31	0.98
2.17	1.13	1.40528	0.740764						2.08	1.17	2.13	0.98						1.62	2.58	1.93	1.68
2.4	0.23	1.48186	1.15284						2.43	0.59	2.6	0.87						2.98	0.34	2.21	1.02
1.45	1.38	2.13759	1.05417						3.88	1.07	1.93	0.5						1.7	1.53	1.86	0.86
1.95	1.23	1.40715	0.730617						3.29	0.86	2.52	1.58						2.71	1.37	2.29	1.26
1.45	0.96	1.87927	2.16433						2.92	1.57	1.46	1.3						1.8	1.73	1.91	0.91
1.27	1.14	2.46146	1.08891						3.07	0.72	1.99	0.99						3.54	1.66	1.61	0.88
2.18	1.21	1.47478	0.562241						1.89	1.35	2.24	1.43						2.45	0.19	2.14	0.96
1.73	1.2	2.34867	0.780662						3.93	0.5	2.31	0.92						4.05	0.97	2.79	1.44
2.55	0.5	2.4998	1.02557						3.37	0.66	1.41	1.48						2.46	0.36	1.35	0.43
2.23	0.56	1.78301	0.95638						1.76	0.63	2.37	0.76						2.27	1.9	3.93	1.01
1.79	1.44	2.95655	0.766267						2.93	0.19	1.7	1						2.1	0.44	2.1	1.47
1.37	0.39	3.85292	1.27107						2.11	1.37	1.73	1.4						2.52	0.12	1.4	0.58
1.67	0.95	2.41405	1.30111						2.07	0.62	1.52	1.15						3.08	1.38	2.31	1.54
2.14	0.99	1.3459	1.002						1.7	1.38	1.77	1.6						2.54	0.27	1.32	1.09
1.37	0.28	1.51501	0.666701						1.98	0.62	3.18	0.92						2.57	0.32	1.49	0.69
3.31	1.44	2.15882	1.19437						1.92	0.86	1.79	0.76						2.04	1.56	1.17	0.98
2.68	1.05	1.80862	1.10213						1.45	1.49	1.48	1.36						2.87	1.56	3.13	0.72
1.5	0.93	2.29742	0.930545						2.44	0.2	2.49	1.29						1.33	0.75	1.56	1.42
2.14	1.78	1.75172	0.699557						2.66	0.38	1.83	0.3						3.01	0.31	2.41	1.04
2.36	0.65	2.44161	0.911252						1.81	0.95	1.79	0.6						2.25	1.86	3.02	1.15
2.18	0.78	2.48694	1.04625						2.57	0.31	1.94	1.02						1.86	0.8	2.86	0.89
1.32	0.34	1.98573	0.77079						1.86	0.85	2.81	1.48						2.97	0.67	1.19	1.2
2.3	1.05	2.13419	0.822902						1.78	0.75	2.09	1.2						1.96	1.61	1.76	1.16
2.01	1.32	2.05469	0.656756						1.96	0.38	1.48	0.92						3.5	2.22	2.05	0.7
2.1	1.63	2.22426	1.46022						2.64	0.79	2.05	0.89						2.38	0.59	2.39	0.75
2.3	0.84	1.90966	1.10659						2.5	0.69	1.9	1.16						1.46	0.56	2	1.14
2.67	1.79	1.41065	1.0124						1.26	1.43	1.77	1.13						2.51	0.39	1.6	0.75
1.44	1.93	1.37971	0.780849						1.88	0.54	3.06	0.89						2.45	0.35	4.2	0.72
1.13	0.18	1.50357	0.62361						2.45	1.38	2.33	1.64						2.24	0.76	2.24	1.16
2.55	1.51	1.59489	1.05068						2.27	0.51	1.45	0.42						3.07	0.35	1.84	0.57
2.45	1.48	1.19643	1.03214						1.73	0.92	2.46	1.31						3.38	1.22	3.09	1.03
2.47	1.02	1.92961	0.722485						1.98	1.31	2.84	0.8						3.15	1.02	1.67	0.77
1.77	1.35	1.48839	0.997289						2.52	0.41	2.53	0.89						2.2	0.19	2.33	1.48
1.24	0.65	2.54221	0.828692						2.49	0.64	1.51	1.42						3.35	1.44	1.83	1.17
1.69	0.17	2.25688	1.03756						3.09	0.69	2.06	0.88						1.75	1.18	1.7	0.91
2.3	0.86	2.36333	0.912824						2.48	0.28	2.69	1.32						2.36	0.38	2.49	1.3
1.59	0.28	2.07822	1.32063						1.73	1.82	2.45	1.16						2.5	0.85	2.25	0.95
1.71	0.42	1.90427	0.914457						2.67	0.24	1.36	1.17						2.31	0.7	2.64	0.94
3.32	0.23	1.61846	0.884421						2.53	0.58	1.72	1.29						1.67	1	1.91	1.17
2.19	0.55	1.85285	1.10822						2.64	1.01	1.6	1.69						2.32	0.54	2.03	0.86
[truncated: 20,097 more rows]

## Sheet: Figure. 5C
	Figs. 5C, 7G
[truncated: 11 more rows]
