# Supplementary material for: Extrusion-modulated DnaA activity oscillations coordinate DNA replication with biomass growth
Source: eLife. 2025 Nov 18;14:RP107214. doi: 10.7554/eLife.107214 (PMC12626423; doi:10.7554/eLife.107214)
Supplement: Figure 6—source data 1. [file elife-107214-fig6-data1.xlsx]

## Sheet: Fig. 6B
	Fig. 6B
	replicate1	Strain	Growth condition	Time after DnaA shutdown (min)	Relative dnaA mRNA (normalized to wild-type MG1655)	Relative dUnCas12f1 mRNA (normalized to the level before induction)	Integrated dilution factor introduced during bacterial culture transfer	OD600	cell number per ml	cellular oriC numbler	Total oriC number per ml	Relative total oriC number (normalized to the level before induction)
		CRidnaA1	M1	-4	0.869346	1	1	0.163	84876000	8.21242	6.97038e+08	1
			M1 + aTc (50 ng·ml-1 )	1	1.0424	21.8027	1.5	0.129	67785000	8.0803	8.21584e+08	1.17868
				3	1.06545	204.765	1.5	0.137	72270000	8.07769	8.75662e+08	1.25626
				5	0.945286	223.419	1.5	0.147	76953000	8.09167	9.34017e+08	1.33998
				7	1.01113	239.972	1.5	0.157	82886000	8.05703	1.00172e+09	1.43711
				10	1.01662	257.065	1.5	0.174	91912000	8.06766	1.11227e+09	1.59571
				15	0.740877	235.097	1.5	0.2	106320000	7.92914	1.26454e+09	1.81416
				24	0.264555	250.024	2.5	0.157	84807000	7.32286	1.55257e+09	2.22739
				32	0.0922327	241.682	2.5	0.196	108115000	6.61407	1.7877e+09	2.56471
				48	0.0574817	220.456	7.5	0.107	59023000	5.05076	2.23583e+09	3.20762
				60	0.0670903	254.432	7.5	0.149	86501000	4.13486	2.68252e+09	3.84846
				72	0.0680506	257.155	7.5	0.205	125183000	3.34991	3.14514e+09	4.51215
	replicate2	Strain	Growth condition	Time after DnaA shutdown (min)	Relative dnaA mRNA (normalized to wild-type MG1655)	Relative dUnCas12f1 mRNA (normalized to the level before induction)	Integrated dilution factor introduced during bacterial culture transfer	OD600	cell number per ml	cellular oriC numbler	Total oriC number per ml	Relative total oriC number (normalized to the level before induction)
		CRidnaA1	M1	-4	1.02754	1	1	0.174	86365000	8.1976	7.07986e+08	1
			M1 + aTc (50 ng·ml-1 )	1	1.06423	58.8673	1.5	0.132	68719000
				3	1.08119	194.687	1.5	0.142	73290000	8.07981	8.88254e+08	1.25462
				5	1.09135	223.841	1.5	0.151	77008000	8.12029	9.37991e+08	1.32487
				7	1.08095	245.103	1.5	0.159	82464000	8.05247	9.96058e+08	1.40689
				10	0.960045	253.101	1.5	0.176	90959000	8.05791	1.09941e+09	1.55287
				15	0.877422	285.296	1.5	0.2	106221000	7.94263	1.26551e+09	1.78748
				24	0.281884	234.945	2.5	0.16	84623000	7.35112	1.55519e+09	2.19663
				30	0.118619	252.788	2.5	0.198	106145000	6.68945	1.77513e+09	2.5073
				38			5	0.12	63716000	6.11193	1.94714e+09	2.75025
				53	0.0569896	270.333	5	0.184	104726000	4.62737	2.42303e+09	3.42243
				63			10	0.124	71360000	4.01101	2.86226e+09	4.04282
				77			10	0.177	107207000	3.00882	3.22567e+09	4.55612
				85	0.0640014	335.21	10	0.217	137076000	2.44624	3.35321e+09	4.73626
	replicate3	Strain	Growth condition	Time after DnaA shutdown (min)	Relative dnaA mRNA (normalized to wild-type MG1655)	Relative dUnCas12f1 mRNA (normalized to the level before induction)	Integrated dilution factor introduced during bacterial culture transfer	OD600	cell number per ml	cellular oriC numbler	Total oriC number per ml	Relative total oriC number (normalized to the level before induction)
		CRidnaA1	M1	-4	0.981687	1	1	0.172	87943000	8.14928	7.16672e+08	1
			M1 + aTc (50 ng·ml-1 )	1	1.11132	3.07451	1.5	0.141	71118000	8.05916	8.59726e+08	1.19961
				3	1.1206	201.518	1.5	0.15	76967000	8.02511	9.26503e+08	1.29278
				5	1.08691	238.436	1.5	0.158	80891000	8.01482	9.7249e+08	1.35695
				7	1.01523	261.41	1.5	0.168	86174000	8.04604	1.04004e+09	1.45121
				10	1.05589	245.567	1.5	0.183	96063000	7.9743	1.14905e+09	1.60332
				15	0.79814	254.161	1.5	0.211	111430000	7.87681	1.31657e+09	1.83706
				25	0.229299	244.733	2.5	0.175	92732000	7.12249	1.65121e+09	2.30399
				32	0.0982131	237.893	2.5	0.212	113149000	6.53023	1.84722e+09	2.5775
				43			5	0.148	78861000	5.50899	2.17222e+09	3.03099
				55	0.0462766	223.585	5	0.208	119972000	4.48213	2.68865e+09	3.75157
				67			10	0.145	84419000	3.79673	3.20516e+09	4.47228
				79	0.0526241	323.478	10	0.2	122924000	2.87294	3.53153e+09	4.92768

## Sheet: Figure 6E
Fig. 6E	experimental data
Strain		initiation mass normalized to wild-type MG1655
	Rel. dnaA mRNA	replicate 1	replicate 2	replicate 3	replicate 4	replicate 5	Mean	SD
RdnaA1	0.24	1.31	1.21	1.41	1.29	1.33	1.31	0.072111
	0.34	1.15	1.1	1.19	1.2	1.25	1.178	0.0563028
	0.52	1.1	1.01	1.1	1.12	1.09	1.084	0.0427785
	0.67	1.02	0.93	1.04	1.08	1.04	1.022	0.055857
	1.14	0.98	0.88	0.96	0.98	0.97	0.954	0.04219
	1.82	0.88	0.82	0.9	0.92	0.94	0.892	0.0460435
	2.83	0.75	0.74	0.83	0.8	0.84	0.792	0.0454973
	3.47	0.73	0.69	0.77	0.73	0.76	0.736	0.031305
	5.28	0.68	0.61	0.7	0.64	0.72	0.67	0.0447214
	7.23	0.65	0.55	0.65	0.6	0.66	0.622	0.0465833
Fig. 6E model simulation
Rel. dnaA mRNA	extrusion
0.25	1.12457
0.287175	1.1132
0.329877	1.10759
0.378929	1.10719
0.435275	1.09838
0.5	1.08703
0.574349	1.07076
0.659754	1.06491
0.757858	1.04372
0.870551	1.02587
1	1.00027
1.1487	0.980272
1.31951	0.950639
1.51572	0.926575
1.7411	0.907252
2	0.880016
2.2974	0.857292
2.63902	0.831134
3.03143	0.80183
3.4822	0.765519
4	0.730063
4.59479	0.690136
5.27803	0.647781
6.06287	0.603745
6.96441	0.561887
