# Supplementary material for: Extrusion-modulated DnaA activity oscillations coordinate DNA replication with biomass growth
Source: eLife. 2025 Nov 18;14:RP107214. doi: 10.7554/eLife.107214 (PMC12626423; doi:10.7554/eLife.107214)
Supplement: Figure 7—source data 1. [file elife-107214-fig7-data1.xlsx]

## Sheet: Figure. 7B-C 
	Fig. 7B
	Host strain	reporter plasmid	Growth condition	[aTc] ng·ml-1	Relative hns mRNA level (normalized to wild-type MG1655, using rpoA as the reference)					Relative Psyn66 trancripts (mcherry) level (normalized to to average expression without aTc induction, rpoA as reference)					Relative Pcon trancripts (gfp) level (normalized to to average expression without aTc induction, rpoA as reference)					Relative DnaA activity (Ratio of Pcon trancripts to Psyn66 trancripts)
					rep.1	rep.2	rep.3	Mean	SD	rep.1	rep.2	rep.3	Mean	SD	rep.1	rep.2	rep.3	Mean	SD	rep.1	rep.2	rep.3	Mean	SD
	Rhns1	Psyn66-Pcon-FPs	M6	0	0.21	0.2	0.21	0.206667	0.0057735	1.13	0.9	0.97	1	0.117898	1.09	0.95	0.97	1.00333	0.0757188	0.964602	1.05556	1	1.00672	0.0458477
				4	0.55	0.71	0.47	0.576667	0.122202	0.77	0.9	0.79	0.82	0.07	0.96	1.05	0.89	0.966667	0.0802081	1.24675	1.16667	1.12658	1.18	0.0611851
				8	1.22	1.27	1.06	1.18333	0.109697	0.75	0.8	0.79	0.78	0.0264575	0.95	1	0.98	0.976667	0.0251661	1.26667	1.25	1.24051	1.25239	0.0132431
				16	2.81	2.95	2.26	2.67333	0.364737	0.71	0.93	0.7	0.78	0.13	1.05	1.17	1	1.07333	0.0873689	1.47887	1.25806	1.42857	1.3885	0.115729
				50	4.71	5.25	4.53	4.83	0.3747	0.79	0.88	0.86	0.843333	0.0472582	1.33	1.46	1.35	1.38	0.07	1.68354	1.65909	1.56977	1.63747	0.0598913
	Fig. 7C
		reporter plasmid	Growth condition	Rel. hns		Cellular oriC number					Cellular mass (OD600 ml per 109 cells)					initiation mass (10-10 OD600 ml)					growth rate (h-1)
	Host strain			Mean	SD	rep.1	rep.2	rep.3	Mean	SD	rep.1	rep.2	rep.3	Mean	SD	rep.1	rep.2	rep.3	Mean	SD	rep.1	rep.2	rep.3	Mean	SD
	Rhns1	Psyn66-Pcon-FPs	M6	0.206667	0.0057735	2.47	2.51	2.51	2.49667	0.023094	0.85	0.81	0.85	0.836667	0.023094	4.96	4.67	4.91	4.84667	0.155027	1.01	1.01	1.04	1.02	0.0173205
				0.576667	0.122202	2.74	2.75	2.73	2.74	0.01	0.81	0.8	0.8	0.803333	0.0057735	4.25	4.22	4.23	4.23333	0.0152753	1.07	1.04	1.07	1.06	0.0173205
				1.18333	0.109697	3.09	3.07	3.03	3.06333	0.0305505	0.83	0.82	0.84	0.83	0.01	3.88	3.85	3.98	3.90333	0.0680686	1.04	1.04	1.04	1.04	0
				2.67333	0.364737	3.71	3.59	3.59	3.63	0.069282	0.9	0.89	0.92	0.903333	0.0152753	3.52	3.57	3.69	3.59333	0.0873689	1.04	1.04	1.04	1.04	0
				4.83	0.3747	4.04	3.93	3.95	3.97333	0.0585947	0.99	0.95	0.97	0.97	0.02	3.52	3.48	3.53	3.51	0.0264575	0.97	0.97	0.97	0.97	1.35974e-16

## Sheet: Figure. 7D-E
	Fig. 7D
	Host strain	reporter plasmid	Growth condition	Time after DnaA shutdown (min)	Relative hns mRNA level (normalized to wild-type MG1655, using rpoA as the reference)					Relative Psyn66 trancripts (mcherry) level (normalized to to average expression without aTc induction, rpoA as reference)					Relative Pcon trancripts (gfp) level (normalized to to average expression without aTc induction, rpoA as reference)					Relative DnaA activity (Ratio of Pcon trancripts to Psyn66 trancripts)					Relative dnaA mRNA level (normalized to wild-type MG1655, using rpoA as the reference)
					rep.1	rep.2	rep.3	Mean	SD	rep.1	rep.2	rep.3	Mean	SD	rep.1	rep.2	rep.3	Mean	SD	rep.1	rep.2	rep.3	Mean	SD	rep.1	rep.2	rep.3	Mean	SD
	Rhns1	Psyn66-Pcon-FPs	M6	-2	0.13	0.22	0.13	0.16	0.0519615	0.806953	1.2782	0.914846	1	0.246895	0.891256	1.22733	0.881414	1	0.196935	1.10447	0.960201	0.963456	1.00938	0.0823706	1.02	1.38	0.92	1.10667	0.241937
				1	1.63	1.44	1.31	1.46	0.160935	1.02518	1.08149	0.861235	0.989302	0.114428	1.2029	1.15042	0.886106	1.07981	0.169794	1.17336	1.06374	1.02888	1.08866	0.0753969	1.02	1.31	0.98	1.10333	0.180093
				3	3.04	2.92	2.32	2.76	0.385746	1.14982	1.11642	0.953272	1.07317	0.105169	1.21473	1.1565	0.867125	1.07945	0.186173	1.05645	1.03591	0.90963	1.00066	0.0795044	1.14	1.31	0.94	1.13	0.185203
				5	3.47	3.23	2.96	3.22	0.255147	1.08705	1.05587	1.06592	1.06961	0.0159137	1.1121	1.03902	0.973601	1.04157	0.0692857	1.02305	0.984045	0.913386	0.973493	0.0555877	1.08	1.07	1.11	1.08667	0.0208167
				7		2.87	2.93	2.9	0.0424264		0.80575	0.98964	0.897695	0.13003		0.917564	0.938782	0.928173	0.0150034		1.13877	0.948609	1.04369	0.134464		0.82	1.08	0.95	0.183848
				10	3.16	3.45	2.85	3.15333	0.300056	0.757381	0.897227	0.903537	0.852715	0.082622	0.803838	0.994807	0.914663	0.904436	0.0958942	1.06134	1.10876	1.01231	1.0608	0.0482232	0.88	0.99	0.92	0.93	0.0556776
				15	3	4.01	3.03	3.34667	0.574659	0.678532	0.878464	0.834919	0.797305	0.105139	0.776399	1.15453	0.902626	0.944517	0.192512	1.14423	1.31426	1.08109	1.17986	0.120594	0.84	1.05	0.96	0.95	0.105357
				20	3.76	3.56	3.25	3.52333	0.25697	0.716453	0.708341	0.807225	0.744006	0.0548992	1.03148	1.0827	1.0563	1.05683	0.025617	1.4397	1.52851	1.30856	1.42559	0.110653	0.88	0.9	1.09	0.956667	0.115902
				25	3.65	3.01	4	3.55333	0.502029	0.626754	0.591434	1.00953	0.742571	0.231864	0.999949	0.956639	1.36005	1.10554	0.221466	1.59544	1.61749	1.34721	1.52005	0.150086	1	0.78	1.4	1.06	0.314325
				30	3.3	4.04	3.28	3.54	0.433128	0.576618	0.76175	0.921256	0.753208	0.172477	0.97318	1.40358	1.59134	1.3227	0.316917	1.68774	1.84257	1.72736	1.75256	0.0804347	0.96	1.12	1.17	1.08333	0.109697
	Fig. 7E
	Host strain	reporter plasmid	Growth condition	Time after DnaA shutdown (min)	Cellular oriC number					Cellular mass (OD600 ml per 109 cells)
					rep.1	rep.2	rep.3	Mean	SD	rep.1	rep.2	rep.3	Mean	SD
	Rhns1	Psyn66-Pcon-FPs	M6	-2	2.59	2.59	2.58	2.58667	0.0057735	0.95	0.92	0.9	0.923333	0.0251661
				1	2.55	2.56	2.54	2.55	0.01	0.92	0.93	0.89	0.913333	0.0208167
				3	2.55	2.56	2.55	2.55333	0.0057735	0.92	0.9	0.9	0.906667	0.011547
				5	2.55	2.58	2.55	2.56	0.0173205	0.93	0.92	0.91	0.92	0.01
				7	2.58	2.61	2.6	2.59667	0.0152753	0.92	0.9	0.9	0.906667	0.011547
				10	2.6	2.64	2.61	2.61667	0.0208167	0.91	0.87	0.9	0.893333	0.0208167
				15	2.69	2.71	2.68	2.69333	0.0152753	0.9	0.9	0.89	0.896667	0.0057735
				20	2.77	2.8	2.78	2.78333	0.0152753	0.92	0.92	0.91	0.916667	0.0057735
				25	2.89	2.88	2.86	2.87667	0.0152753	0.92	0.95	0.94	0.936667	0.0152753
				30	3.03	3.02	2.98	3.01	0.0264575	0.95	0.94	0.93	0.94	0.01

## Sheet: Figure. 7F
	Fig. 7F
	Rhns2 strain containg Psyn66-lacZ or Pcon-lacZ plasmid cultivated in with various aTc concentration
	M6 medium									M6 medium									M6 medium									M6 medium									M6 medium									M1 medium
	aTc concentration : 0 ng·ml-1 aTc									aTc concentration : 4 ng·ml-1 aTc									aTc concentration : 8 ng·ml-1 aTc									aTc concentration : 16 ng·ml-1 aTc									aTc concentration : 50 ng·ml-1 aTc									aTc concentration : 0 ng·ml-1 aTc
	original data									original data									original data									original data									original data									original data
	Psyn66-lacZ		Pcon-lacZ		Binned Cell volume (µm3)	Rel. DnaA activity (ksyn66-1)				Psyn66-lacZ		Pcon-lacZ		Binned Cell volume (µm3)	Rel. DnaA activity (ksyn66-1)				Psyn66-lacZ		Pcon-lacZ		Binned Cell volume (µm3)	Rel. DnaA activity (ksyn66-1)				Psyn66-lacZ		Pcon-lacZ		Binned Cell volume (µm3)	Rel. DnaA activity (ksyn66-1)				Psyn66-lacZ		Pcon-lacZ		Binned Cell volume (µm3)	Rel. DnaA activity (ksyn66-1)				Psyn66-lacZ		Pcon-lacZ
	Cell volume (µm3)	Rel. lacZ mRNA conc. lacZ mRNA FISH intensity per cell volume, normalized to populational average	Cell volume (µm3)	Rel. lacZ mRNA conc. lacZ mRNA FISH intensity per cell volume, normalized to populational average						Cell volume (µm3)	Rel. lacZ mRNA conc. lacZ mRNA FISH intensity per cell volume, normalized to populational average	Cell volume (µm3)	Rel. lacZ mRNA conc. lacZ mRNA FISH intensity per cell volume, normalized to populational average						Cell volume (µm3)	Rel. lacZ mRNA conc. lacZ mRNA FISH intensity per cell volume, normalized to populational average	Cell volume (µm3)	Rel. lacZ mRNA conc. lacZ mRNA FISH intensity per cell volume, normalized to populational average						Cell volume (µm3)	Rel. lacZ mRNA conc. lacZ mRNA FISH intensity per cell volume, normalized to populational average	Cell volume (µm3)	Rel. lacZ mRNA conc. lacZ mRNA FISH intensity per cell volume, normalized to populational average						Cell volume (µm3)	Rel. lacZ mRNA conc. lacZ mRNA FISH intensity per cell volume, normalized to populational average	Cell volume (µm3)	Rel. lacZ mRNA conc. lacZ mRNA FISH intensity per cell volume, normalized to populational average						Cell volume (µm3)	Rel. lacZ mRNA conc. lacZ mRNA FISH intensity per cell volume, normalized to populational average	Cell volume (µm3)	Rel. lacZ mRNA conc. lacZ mRNA FISH intensity per cell volume, normalized to populational average
						Mean	SEM	Smoothed datat							Mean	SEM	Smoothed datat							Mean	SEM	Smoothed datat							Mean	SEM	Smoothed datat							Mean	SEM	Smoothed datat
	1.72	1.35	2.49	0.85	1	1.32134	0.0740548	1.29899		1.2	0.9	1.35	0.99	1	1.04999	0.0508992	1.05836		1.35	1.86	1.6	1.31	1.1	0.891409	0.0259923	0.888632		1.49	0.19	1.67	0.94	1.1	1.24789	0.0437046	1.16272		1.28	0.23	1.73	1.2	1.2	1.88811	0.121361	1.80865		1.49	0.51	2.23	0.81
	1.41	0.89	1.22	1	1.1	1.08741	0.0363629	1.13275		1.64	0.36	4.14	1.03	1.1	0.963777	0.0364752	0.943764		2.36	1.26	1.89	1.26	1.2	0.932777	0.0241171	0.940024		2.6	0.94	3.47	0.4	1.2	1.29535	0.0348595	1.37723		1.26	0.86	1.77	0.61	1.3	2.10885	0.0989854	2.26768		2	1.17	1.73	1.13
	1.73	1.21	1.31	0.7	1.2	1.0353	0.0363392	1.0341		1.81	0.73	0.99	1.1	1.2	0.915582	0.0200246	0.921871		1.19	1.46	2.45	0.93	1.3	1.09348	0.0297059	1.07802		1.04	2.19	1.56	1.12	1.3	1.47151	0.0340607	1.60306		1.79	1.31	1.36	0.88	1.4	2.52675	0.0929293	2.51335		1.55	0.33	1.73	0.72
	1.53	0.68	1.26	1.45	1.3	1.03839	0.041706	1.00607		1.7	0.76	1.76	0.66	1.3	0.981211	0.0204251	0.989684		1.63	0.87	1.47	1.29	1.4	1.24939	0.0280657	1.3032		2.36	1.58	1.21	1.02	1.4	1.82195	0.0397076	1.83215		2.17	1.08	2.06	0.81	1.5	2.60112	0.0843239	2.55348		2.06	2.63	1.73	0.88
	1.86	0.91	1.7	0.88	1.4	1.00463	0.027075	1.03177		1.38	0.99	1.41	1.04	1.4	1.17926	0.0253783	1.16357		2.4	1.49	1.82	0.87	1.5	1.60514	0.0376583	1.64489		1.49	0.39	2.07	1.04	1.5	2.06544	0.0393538	2.10017		1.7	1.65	2.2	0.7	1.6	2.37216	0.0821208	2.29826		2.29	1.25	1.72	0.77
	0.97	1.49	2.23	0.68	1.5	1.1317	0.029702	1.11595		1.69	0.63	1.84	0.95	1.5	1.41876	0.0305544	1.44735		1	1.15	1.15	1.05	1.6	2.05671	0.0461309	1.99053		1.55	0.43	2.28	1.06	1.6	2.31324	0.045152	2.25686		2.39	1.14	2.43	1.1	1.7	1.75858	0.0680412	1.80975		1.46	0.41	2.06	0.65
	1.87	0.36	1.65	0.82	1.6	1.25031	0.0286465	1.29606		1.1	1.93	1.31	0.88	1.6	1.81157	0.0403894	1.79522		2.17	1.34	2.29	1.12	1.7	2.19687	0.0499525	2.19465		1.47	0.47	2.99	1.2	1.7	2.22265	0.0441166	2.17365		1.39	0.74	1.62	0.86	1.8	1.27495	0.0531859	1.31935		1.98	1.16	2.25	1.09
	1.5	1.18	2.32	0.8	1.7	1.55621	0.0352932	1.53335		1.82	0.76	2.75	0.92	1.7	2.09985	0.0459932	2.103		1.6	0.58	1.87	0.94	1.8	2.17434	0.0483983	2.13038		1.83	1.02	2.32	1.11	1.8	1.84882	0.0428585	1.86514		1.77	1.19	1.7	1	1.9	0.999871	0.0372345	1.00777		1.96	1.55	1.86	0.56
	1.77	0.75	2.57	0.91	1.8	1.76999	0.0384759	1.75951		1.6	0.17	1.56	0.87	1.8	2.23709	0.0529175	2.22662		1.32	1.07	2.26	1.06	1.9	1.87387	0.0506119	1.86148		2.05	1.35	1.49	0.44	1.9	1.44791	0.0332712	1.46076		1.61	0.18	1.03	0.9	2	0.873232	0.0242865	0.896613		1.66	1.97	2.52	0.6
	2.02	0.3	1.22	1.05	1.9	1.91519	0.0447637	1.90989		1.78	0.24	1.24	1.51	1.9	2.13599	0.0529062	2.12174		1.67	0.21	1.5	1.34	2	1.46393	0.0448135	1.5312		1.57	1.02	2.13	1.44	2	1.09833	0.0284173	1.13284		2.9	0.55	1.39	0.81	2.1	0.939636	0.0294402	0.890861		3.61	0.58	1.91	1
	1.68	0.56	1.67	0.65	2	1.95761	0.04415	1.95446		1.21	0.95	2.08	1.01	2	1.84455	0.0560551	1.86906		1.36	1.1	1.71	1.01	2.1	1.26018	0.044621	1.24299		1.43	0.7	1.7	0.97	2.1	0.940922	0.0229276	0.948095		2.2	1.22	1.24	1.07	2.2	0.930379	0.0184251	0.943423		1.11	0.38	1.54	0.37
	1.17	1.72	1.31	1.33	2.1	1.91322	0.0564914	1.91622		1.42	0.32	1.73	0.84	2.1	1.59499	0.0723628	1.59618		2.34	0.64	1.75	0.76	2.2	1.05733	0.04683	1.05806		2.26	0.93	2.23	0.94	2.2	0.886791	0.0210761	0.88135		1.94	1.27	2.68	1.17	2.3	1.02755	0.0252308	1.03002		1.9	1.88	1.95	1.27
	1.69	0.5	1.22	0.89	2.2	1.79308	0.0730119	1.80374		1.47	1.16	1.21	0.66	2.2	1.30273	0.0639348	1.31253		1.77	1.2	2.36	0.73	2.3	0.945193	0.0506943	0.953204		1.8	1.17	1.69	1.17	2.3	0.897546	0.0236136	0.877793		1.83	1.12	1.88	0.78	2.4	1.18384	0.0567184	1.17731		2.13	0.86	2.08	1.06
	1.12	1.18	1.46	1.41	2.3	1.62637	0.0843809	1.61324		2.11	1.27	1.79	0.88	2.3	1.0185	0.0466219	1.01355		1.75	0.37	1.45	0.49	2.4	0.92926	0.0519608	0.922068		1.56	0.45	1.98	0.8	2.4	0.889474	0.0201589	0.906549		1.62	0.2	1.36	1.08	2.5	1.37696	0.0560037	1.39359		2.3	1.39	2	0.69
	1.58	0.35	1.48	1.04	2.4	1.34127	0.0942336	1.34587		1.67	1.37	1.82	1.05						1.08	1.18	2.51	0.99	2.5	0.963699	0.0882827	0.965744		1.54	0.64	2.21	1.66	2.5	0.95831	0.0246542	0.949883		1.34	0.48	1.88	1.38	2.6	1.69604	0.088882	1.66413		1.75	1.1	1.71	0.92
	1.41	0.87	1.78	1.42						2.07	1.09	2.3	0.94						2.2	1.45	1.69	0.92						1.95	1.88	1.41	0.61	2.6	1.0348	0.0351478	1.01637		2.03	1.36	2.61	0.93	2.7	1.9774	0.11942	1.9911		1.48	0.51	3	1.32
	1.38	1.96	1.39	1.54						1.34	1.1	1.32	0.9						1.23	1.07	2.3	0.75						1.95	1.3	2.34	0.99	2.7	1.08204	0.0324171	1.10806		1.17	1.06	1.74	0.95						1.77	0.71	1.71	0.55
	1.22	0.75	1.75	1.2						1.82	0.27	2.12	0.68						1.52	1.44	2.21	1.12						1.57	0.34	1.34	0.85	2.8	1.2333	0.0592714	1.22379		2.82	0.62	1.96	0.87						4.15	0.83	3.14	1.24
	1.72	1.54	1.37	0.82						1.67	0.3	2.09	1.22						2.05	1.33	2.65	1.56						1.6	1.15	1.26	1.25						1.62	1.83	1.67	0.55						1.3	1.16	3.66	1.05
	1.62	0.72	1.93	1.03						1.38	0.87	2.12	0.8						1.56	1.34	2.22	0.69						1.43	1.05	2	0.69						1.13	0.75	2.15	0.83						1.55	0.68	2.82	0.55
	1.52	1.09	2	0.75						1.52	0.56	1.15	0.5						1.63	0.99	1.89	0.64						1.83	0.88	1.72	0.89						2.04	1.14	2.22	0.78						1.56	0.47	2.79	0.69
	1.64	0.54	1.27	0.9						2.26	2.12	1.2	1.05						1.25	0.43	1.42	0.61						2.03	1.13	1.95	0.92						1.42	0.22	3.53	0.88						1.66	0.67	2.03	1.05
	1.58	1.45	1.9	1						1.26	1.6	1.71	1.13						3.04	0.97	1.69	1.43						1.83	0.81	2.58	0.33						1.58	0.32	1.43	1.18						2.31	0.8	1.77	0.59
	1.53	1.26	1.77	1.15						1.16	0.98	1.6	2.08						1.09	1.82	1.46	1.4						2.15	1.12	2.09	1.24						1.83	1.74	1.62	1.17						2.33	1.3	2.99	1.21
	1.48	1.46	2.01	1.07						1.53	1.02	1.43	0.67						2.21	0.92	1.36	1.34						1.93	0.48	1.76	0.91						2.55	1.39	1.92	0.59						1.55	0.73	2.65	0.79
	1.14	1.21	0.83	0.88						1.82	0.42	1.56	0.93						1.08	1.35	2.22	0.93						1.41	0.55	1.39	0.98						2.21	0.89	2.44	0.96						1.37	0.96	2.2	0.72
	2.18	1.26	1.46	1.06						1.74	1.21	2.25	0.67						2.42	1.01	1.42	0.86						1.4	0.3	1.43	1.13						2.12	1.34	2.43	1.25						1.91	0.98	1.56	0.78
	1.15	1.39	2.93	2.01						1.69	0.45	1.59	1.01						1.55	0.6	1.18	0.65						1.88	0.31	1.58	0.98						2.02	1.16	2.14	0.68						1.72	1.55	1.63	1.5
	1.71	0.57	1.74	0.67						2.1	1.86	1.77	1.03						2.51	1.48	2.19	0.8						2.19	0.88	1.82	0.45						2.32	0.78	1.85	1.19						1.82	0.74	2.25	0.58
	1.49	2.23	1.42	1.34						2.5	1.58	1.77	0.85						1.37	1.7	1.91	1.28						1.42	1.67	1.4	1.24						2.17	1.02	2.12	1.22						2.31	1.25	2.02	0.92
	1.86	0.4	1.51	0.86						1.47	0.98	2.39	1.34						1.11	1.26	1.57	0.45						1.66	0.97	1.5	1.38						1.35	0.75	1.88	0.85						2.27	1.8	1.56	1.64
	1.97	0.64	1.51	1.03						1.36	1.12	2.39	0.84						1.69	0.36	1.74	1.16						2.41	0.8	1.56	1.22						2.74	0.71	1.48	0.7						1.71	0.48	2.19	0.88
	2.21	1.03	1.66	1.5						1.43	1.24	2.08	1.38						1.22	1.48	1.65	1.25						2.01	0.88	2.16	0.76						1.47	0.68	2.6	0.94						2.25	1.42	3.1	0.8
	1.47	1.71	2.52	0.9						1.18	0.8	1.47	0.65						1.79	0.39	1.98	1.08						1.97	2.4	1.5	0.68						1.53	0.96	1.79	0.98						1.97	0.35	1.89	0.71
	2.58	1.07	1.31	0.47						0.97	1.49	2.1	0.96						1.68	1.21	1.97	1.55						1.64	1.26	1.66	1.68						1.83	1.51	1.94	1.13						2.86	1.54	1.85	0.85
	5.21	0.08	2.62	1.23						1.54	0.57	4.42	1.09						1.66	0.57	1.6	1.26						2.74	1.03	1.89	2.37						1.84	0.71	2.1	0.73						1.98	1.64	1.77	0.89
	1.97	1.06	2.23	0.98						1.65	1.33	1.63	0.8						1.75	0.64	1.86	0.74						1.65	0.4	1.63	0.85						1.89	0.14	2.52	1.03						1.39	1.49	1.67	0.48
	1.36	2.48	1.25	1.53						1.53	0.41	1.59	0.33						1.36	0.34	1.85	0.78						1.77	1.38	1.37	1.52						1.13	0.69	2.01	1.93						1.52	0.47	2.57	0.74
	2.51	1.64	1.9	1.17						0.94	0.68	1.6	1						1.87	1	1.62	1.03						2.32	1.16	1.43	0.63						1.43	1.13	2.17	1.16						2.54	0.66	2.31	0.97
	1.88	0.65	2.32	0.96						1.89	0.27	0.89	0.81						2.09	1.13	1.97	0.84						2.41	1.15	1.32	1.08						1.4	0.82	1.33	2.31						1.87	1.72	2.65	1.11
	1.74	0.36	2	1.54						1.4	0.77	1.16	1.19						1.48	0.76	1.76	0.82						1.1	0.26	1.72	1.35						2.36	1.03	1.83	0.99						1.56	1.21	1.7	0.93
	2	0.44	2.11	1.18						2.02	0.61	1.4	0.65						2.16	0.88	1.35	0.61						1.45	0.83	1.86	0.56						2.74	0.19	2.05	0.97						1.85	0.5	1.34	0.76
	2.24	0.99	1.27	0.42						1.04	0.82	2.51	0.9						1.43	0.46	1.68	1.11						1.94	0.39	1.53	0.59						1.83	1.01	1.67	1.88						2.46	0.41	2.37	0.81
	1.83	0.93	1.68	2.04						2.05	0.3	1.28	1.37						1.9	1.18	1.67	1.47						2.24	1.6	1.9	0.93						1.54	0.31	1.54	1.36						1.48	0.28	1.27	1.02
	1.72	0.33	2.11	1.28						1.61	0.87	1.85	0.9						1.45	1.28	2.28	1.06						1.53	0.62	1.9	1.13						1.98	1.17	2.35	1.35						1.54	0.39	2.62	0.81
	1.3	0.77	1.4	0.65						1.62	1.54	1.28	1.52						1.49	0.39	1.82	1.19						1.69	0.43	2.34	1.38						1.97	1.64	2.53	0.87						1.23	0.81	2.42	1.03
	1.25	1.06	1.4	1.24						2.69	1.24	1.21	0.9						1.29	1.53	1.54	0.93						1.7	0.48	2.57	1.12						1.65	0.41	2.12	1.15						1.13	1.38	1.38	0.93
	1.53	0.87	1.69	1.12						1.11	2.51	1.53	1.23						1.62	0.71	1.17	0.61						2.28	1.13	1.98	0.93						1.8	1.03	1.42	1.33						1.29	1.24	2.06	0.78
	1.77	0.24	1.46	1.16						2.12	1.9	2.15	1.02						3.17	0.09	1.79	1.21						2.89	0.97	2.24	0.68						1.49	0.57	2	0.59						2.32	2.19	3.4	0.8
	1.49	1.41	1.09	1.63						1.23	1.95	1.99	0.94						1.66	1.11	1.58	1.04						1.84	1.16	1.14	1.22						1.45	0.5	2.83	1.31						2.35	1.5	2.9	1.39
	1.71	1.28	1.41	0.43						1.89	0.26	2.58	0.91						1.88	0.26	1.43	1.12						1.59	0.62	1.44	0.78						1.82	1.12	2.29	0.95						2.24	2	2.52	0.54
	1.4	1.05	1.1	1.25						1.73	2.04	1.7	1.08						1.81	0.25	1.59	1.1						1.96	1.03	1.42	1.25						2.08	1.04	1.71	0.75						2.79	0.89	2.12	1.37
	1.56	0.45	1.29	0.61						1.64	0.23	2.43	1.12						1.8	0.24	2.63	1.53						1.91	1.04	1.62	0.91						1.68	1.26	2.21	0.61						2.84	0.89	1.85	1.61
	1.88	1.67	1.87	0.93						1.75	0.37	1.46	1.19						1.26	1.54	2	0.73						2.04	1.07	2.23	0.92						1.78	1.32	2.48	1.3						1.32	0.24	1.94	0.59
	2.2	1.15	1.63	1.16						2.65	1.57	1.8	1.3						1.71	0.34	1.83	1.4						1.97	1.02	2.87	0.81						1.67	1.4	2.53	1.07						2.43	1.35	1.32	1.41
	2.32	1.67	1.26	0.89						1.56	0.85	2.53	1.02						1.55	1.54	1.65	1.45						1.15	1.38	1.65	0.95						1.44	1.56	2.29	0.96						1.96	1.31	1.95	0.93
	1.16	1.04	2.03	0.96						1.42	2.27	1.29	0.82						1.42	1.17	1.98	1.52						2.41	1.1	1.78	0.94						1.51	0.37	1.93	1.2						1.47	0.61	1.87	1.19
	1.93	1.62	1.03	1.41						1.76	0.36	2.62	0.61						1.49	0.34	1.6	0.76						1.32	0.48	2.17	0.78						1.7	0.92	1.93	0.92						1.89	1.45	1.77	0.9
	1.19	0.76	2.18	1.46						1.38	0.72	2.18	0.96						1.83	0.43	1.17	0.99						1.55	0.86	1.85	1.3						2.12	1.06	1.52	0.83						1.36	0.33	2.3	0.67
	1.79	0.37	2.59	0.79						1.06	1.41	0.9	1.06						1.58	1	1.26	0.7						2.43	1.53	1.54	1.36						2.13	1.41	2.27	1.02						1.66	0.98	1.62	1.45
	2.04	0.5	1.83	0.59						1.02	1.54	1.96	0.86						1.44	0.85	2.25	0.81						1.55	0.85	1.77	1.25						1.29	1.05	2.07	0.68						2.04	0.93	1.48	1.41
	1.95	1.52	1.99	1.06						1.52	0.25	1.67	1.17						1.2	0.39	2.28	1.16						1.96	0.16	1.26	0.56						2.27	1.15	1.92	0.35						2.71	0.95	2.18	0.99
	1.76	1.22	1.33	0.81						1.38	1.21	2.55	0.64						2.09	0.39	1.02	0.59						1.49	0.26	1.84	0.82						1.39	0.15	1.66	1.17						2.18	1.36	2.92	0.97
	1.9	0.69	2.11	1.08						2.32	0.94	1.1	1.26						1.64	0.54	1.38	1.72						1.39	1.47	2.03	1.46						1.49	0.22	2.5	1						1.78	0.18	1.66	1.55
	0.99	1.1	1.97	1.44						1.48	0.47	1.24	1.49						1.37	0.77	2	0.82						2.08	0.33	0.92	0.46						1.93	1.37	1.88	0.68						1.41	0.36	1.82	0.93
	1.91	0.67	1.14	0.37						1.8	0.4	1.21	0.94						1.63	0.54	1.58	0.67						2.15	1.49	1.42	1.12						1.71	1.55	2.27	1.11						1.41	1.36	2.31	0.7
	1.98	0.46	1.89	1.32						1.15	0.73	1.83	0.88						1.59	0.36	1.47	0.66						2.46	1.2	1.66	0.97						1.77	1.37	2.4	0.75						2.24	1.4	2.61	0.94
	1.43	0.96	1.95	1.04						1.07	0.29	1.44	1.03						2.43	1.21	1.72	1.09						1.91	0.19	1.68	1.54						2.55	1.04	1.86	1.24						1.33	1.12	2.03	1.75
	1.25	2.07	1.68	1.35						1.23	1.09	2.26	0.95						1.26	1.77	1.29	0.66						2.04	1.98	2.05	0.92						2.11	0.9	2.81	0.75						2.2	0.61	1.53	1.4
	1.91	1.47	1.5	1.95						1.9	0.51	1.5	0.56						1.12	1.08	1.91	0.93						1.84	0.86	1.84	0.89						1.54	0.91	1.57	0.63						1.35	0.84	2.35	0.86
	1.3	1.6	1.79	1.06						1.66	0.81	1.76	0.73						1.88	0.53	1.71	0.91						1.18	0.35	2.3	1.64						1.47	0.28	1.75	1.58						1.98	0.59	1.45	0.25
	1.78	0.99	1.09	1.19						2.06	0.2	2.27	1.18						2.05	1.21	1.74	0.92						1.94	1.38	2.63	1.4						3.06	0.29	1.93	1.17						2.03	1.8	1.24	0.77
	1.19	1.27	2.07	1.17						1.53	1.05	2.14	1.39						1.47	1.1	1.74	1.14						1.54	0.49	1.69	1.17						2.82	1.13	2.42	0.99						1.97	1.26	1.8	0.99
	1.95	0.71	1.66	0.81						1.81	0.13	1.79	0.8						7.02	1.69	1.77	0.77						1.93	0.47	1.6	1.32						1.7	0.36	1.98	1.08						1.49	0.44	1.94	1.21
	1.18	1.05	1.98	0.94						1.61	0.51	0.93	0.83						1.35	1.27	2.15	1.17						1.28	0.77	2.11	1.34						1.7	0.56	1.44	0.96						2.27	1.46	2.29	0.47
	1.89	0.33	2.43	1.28						1.42	1.04	1.39	0.69						1.14	1.64	1.86	1.12						1.58	0.63	1.29	0.84						1.59	0.2	2.05	0.83						2.56	0.71	2.25	0.53
	1.36	0.94	1.87	0.8						1.43	0.31	1.1	0.46						1.84	0.29	2.28	1.1						2.7	0.95	2.14	0.99						1.41	0.28	1.83	0.85						1.54	0.54	2.48	0.24
	2.54	1.33	1.35	0.54						2.45	1.74	1.63	0.68						1.42	0.92	1.11	0.49						2.66	1.01	2.63	1.12						2.21	1.24	1.45	0.57						2.89	0.53	1.51	1.75
	1.79	0.74	1.27	1.26						1.75	1.62	1.5	1.56						1.61	1.45	2.26	1.19						1.2	0.95	1.66	1.54						1.78	0.38	1.7	0.94						2.42	1.52	2.53	1.01
	1.27	0.97	2.01	1.19						1.15	1.01	1.28	0.81						1.72	0.33	1.92	1.53						1.96	1.39	2.09	1.48						1.93	1.32	2.13	1.17						1.85	1.23	2.04	0.8
	3.99	0.28	1.5	0.9						1.48	1.44	1.24	0.56						2.3	1.02	2.89	1.16						2.77	0.51	2.25	1.32						2.43	0.84	2.22	1.02						1.57	0.64	2.05	1.82
	1.99	1.16	1.16	0.49						1.13	1.57	2.01	0.83						0.94	1.29	1.78	0.66						1.97	1.48	1.78	0.94						2.24	1.39	2.96	0.69						1.9	1.4	2.11	0.84
	1.11	0.62	2.21	1.13						1.36	1.97	1.7	0.93						1.28	0.7	2.38	0.96						1.66	0.22	2.72	1.02						2.02	1.29	1.61	0.97						2.62	1.19	1.85	1.33
	1.24	1.61	1.43	1.16						1.39	1.44	1.3	0.7						1.59	0.91	1.48	0.56						1.07	0.54	1.93	0.71						1.65	1.37	1.62	0.98						2.24	1.38	2.29	0.66
	1.12	1.46	2.06	1.25						1.23	1.3	1.26	0.74						1.93	0.31	1.41	1.05						1.37	0.51	1.55	0.44						1.76	2.34	2.02	1.1						2.11	1.01	2.55	1.2
	1.74	0.88	4.22	0.77						1.71	1.77	1.09	0.39						1.8	1.72	1.84	1.06						1.2	0.4	1.36	1.14						1.56	0.99	2.44	0.99						2.48	1.01	3.15	1.45
	1.81	0.27	2.27	1.28						1.3	1.28	1.15	2.23						1.8	0.47	1.91	0.86						1.72	0.57	1.47	1.79						1.61	1.69	1.95	1.23						1.48	0.53	1.93	1.22
	1.4	1.38	2.23	1.03						2.4	0.63	2.18	0.88						1.17	1.27	1.72	0.46						1.59	0.29	2.73	1.04						2.26	1.11	1.79	0.87						1.8	1.44	1.62	0.77
	1.73	0.38	3.8	1.35						1.65	0.28	1.32	1.15						1.77	1.09	2.07	1.15						1.82	1.56	1.79	1.12						1.82	1.33	1.58	1.31						1.81	0.65	1.97	1.02
	1.88	0.69	6.03	1.16						2.52	0.93	1.65	0.95						1.67	0.64	2.04	1.18						2.39	0.57	1.43	0.95						1.29	0.92	2.5	0.78						2.32	1.4	1.7	0.83
	1.91	0.75	1.6	1.01						1.91	1.15	1.81	0.92						1.98	0.42	1.5	1.71						1.56	0.5	0.84	2.06						1.75	0.67	1.91	0.58						1.36	1.44	2.06	0.8
	1.18	0.99	1.1	0.71						2.11	1.3	1.69	1.42						1.6	0.46	1.67	0.93						1.63	1.97	1.47	0.91						1.95	1.11	1.57	0.87						1.8	1.08	2.18	0.65
	1.89	0.42	2.08	1.28						0.91	0.22	2.77	0.06						1.94	0.46	1.66	1.88						1.53	0.75	1.61	1.01						2.03	1.5	2.85	1.07						2.12	1.32	2.23	0.98
	1.84	1.07	1.41	0.76						1.35	1.05	1.94	0.78						1.44	1.31	1.27	1.01						1.53	0.7	1.79	0.6						1.44	0.19	1.36	1.32						2.95	2.14	1.9	1.71
	1.13	1.45	1.55	1.01						1.75	0.25	1.62	0.92						1.38	1.63	1.41	0.96						1.55	0.29	2.07	1.51						1.03	1.2	1.79	0.83						2.51	0.97	2.86	1.11
	1.99	1.06	1.51	0.8						1.66	1.02	1.55	0.89						1.77	0.28	1.47	1.43						1.72	0.67	1.71	1.22						2.59	0.37	1.67	0.65						2.35	0.78	3	0.73
	1.7	0.47	1.49	1.51						1.72	0.46	1.45	0.81						1.78	0.58	1.52	1.33						2.06	1.55	3.5	1.04						1.56	0.13	1.66	1.18						2.74	0.67	2.92	0.66
	1.29	1.43	1.84	0.72						1.6	0.26	1.71	1.66						1.28	1.12	1.47	0.94						1.22	1	1.79	0.96						1.61	0.83	1.95	1.45						2.84	1.71	1.63	0.8
	1.52	1.11	1.72	0.79						1.29	1.79	1.55	1.98						2.04	0.88	1.98	1.02						1.74	1.52	1.38	1.23						2.48	0.29	2.21	0.93						1.91	0.33	1.92	1.47
	1.26	1.38	1.75	1.34						1.83	0.73	2.55	0.95						1.39	0.53	1.31	1.68						1.81	1.82	1.7	1.48						1.53	0.22	1.57	1.61						2.16	0.87	2.95	0.6
	1.41	1.08	1.64	1.1						2.1	0.26	1.41	2.01						1.59	0.82	2.13	1.06						2.17	1.48	2.21	0.95						1.1	1.02	2.29	0.99						1.93	1.72	1.24	0.29
	1.1	1.39	1.72	1.28						1.6	0.92	0.84	0.83						1.86	1.05	1.39	1.19						1.94	1.18	1.52	0.68						1.61	0.64	2.3	1.19						1.51	0.48	2.45	0.54
	1.96	0.45	1.41	0.51						1.25	1.27	1.68	1.13						1.91	1.59	1.63	0.85						1.76	1.05	5.3	1.28						2.09	1.16	1.96	0.91						2.24	1.48	1.94	1.5
	1.6	3.03	1.47	1.4						2.11	1.68	1.84	1.26						1.98	1.57	1.44	1.38						1.45	0.64	2.26	1.12						1.26	0.15	1.69	0.98						1.92	1.38	1.82	1.03
	1.91	0.75	1.16	0.73						1.12	1.53	1.79	0.58						1.62	0.34	1.13	1.1						1.43	0.43	1.46	0.88						1.67	0.29	1.02	1.12						2.64	0.31	1.84	1.76
	1.54	1.31	2.09	0.61						1.88	0.66	1.66	0.9						1.8	1.05	1.59	1.21						2.27	1.66	1.97	0.78						1.61	0.59	1.25	0.63						2.6	0.57	2.36	1.24
	1.49	1.41	1.53	1						2.19	1.55	2.02	1.01						1.72	1.73	1.85	1.01						1.4	1.07	2.3	0.99						1.99	1.25	2.33	1.16						1.61	0.92	2.17	1.84
	1.89	0.8	1.8	0.89						1.26	0.78	1.12	0.66						1.77	1.1	1.39	1.4						1.78	1.21	1.83	0.62						2.3	1.29	2.59	0.81						1.43	0.39	3.51	0.95
	1.44	1.11	1.75	0.88						1.22	1.53	1.33	0.61						3.4	1.02	1.75	1.08						1.04	1.55	1.73	0.59						3.07	0.95	1.43	1.61						1.56	1.88	1.27	1.45
	1.28	0.94	1.7	1.35						1.55	0.88	1.57	1						1.98	1.09	1.44	1.16						1.5	1.15	1.81	1.4						1.58	0.39	2.64	0.62						2.24	1.79	2.07	0.85
	2.43	1.2	1.7	1						1.7	0.64	1.77	1.09						1.99	1.31	1.28	0.88						1.43	0.54	2.17	1.04						1.36	0.25	1.48	2.1						1.48	0.99	2.12	0.94
	1.69	1.5	1.92	1.18						0.92	1.35	2.79	1.16						2.31	1.18	1.45	0.88						1.14	1.3	1.91	0.67						1.28	1.11	2.26	1.22						1.91	1.51	2.3	0.36
	1.6	1.32	1.22	0.93						1.23	0.67	2.26	0.74						1.86	0.91	2.09	0.91						2.25	0.86	1.64	0.9						2.37	1.24	2.08	0.93						1.53	0.65	1.95	1.59
	2.28	0.41	1.25	0.84						2.08	0.49	1.52	1.62						1.44	0.85	1.77	1.22						1.29	1.33	1.31	1.09						2.22	1.1	1.71	1.03						2.07	2.41	1.74	0.85
	1.49	0.77	1.69	1.63						1.66	0.5	2.03	0.66						1.51	0.48	1.4	1.2						1.43	1.15	1.43	0.94						2.93	0.73	1.56	0.95						2.3	1.41	2.65	0.9
	3.65	1.27	1.84	0.93						1.78	0.52	2.46	0.73						1.28	2.3	1.66	0.9						1.4	0.67	2.41	0.75						2.14	1.29	2.56	1.12						2.82	1.2	1.48	1.15
	2.18	0.57	1.11	1.08						1.83	0.98	1.53	1.02						1.75	1.41	1.41	0.64						2.2	1.18	1.69	0.86						1.96	1.87	1.71	0.93						2.89	0.74	2.51	1.05
	1.77	1.12	1.73	0.97						2.01	0.27	1.5	0.92						1.28	1.45	2.56	0.68						1.7	0.26	1.29	1.27						1.78	1.57	1.87	1.19						1.82	1.3	1.64	1.49
	1.57	0.44	1.37	0.58						2.44	1.29	1.74	0.85						1.83	0.2	2.16	1.05						1.66	1.5	2.36	0.72						1.86	1.23	2.18	1.05						2.04	1.81	1.78	1.2
	1.23	1.97	1.52	0.98						2.02	0.95	1.31	0.6						1.58	0.5	1.81	1.14						1.74	1.68	1.98	1						2.62	1.16	1.95	0.72						1.7	1.98	2.18	0.92
	1.61	0.4	1.95	1.03						1.62	0.97	1.66	0.76						1.74	0.44	2.03	0.77						2.28	1.99	1.44	1.7						1.5	0.87	1.28	0.81						1.61	1.62	2.01	1
	1.06	0.52	1.53	0.97						2.65	1.07	2.38	1.54						1.74	0.26	1.22	0.78						1.11	1.05	1.94	0.95						1.94	1.29	2.03	0.97						1.64	1.33	1.25	0.42
	2.12	1.41	1.52	0.67						1.39	1.27	1.69	1.74						1.7	1.11	1.17	0.77						2.2	0.85	1.36	0.42						1.78	1.22	1.45	0.83						1.64	1.29	1.67	0.87
	1.44	1.09	1.76	1.25						1.81	0.32	1.66	0.92						1.71	0.78	1.36	0.78						1.96	1.22	1.79	0.96						1.55	0.39	2.16	1.08						4.01	1.39	2.65	1.48
	1.92	0.38	1.41	0.4						1.73	0.39	1.82	0.78						1.71	1.68	2.24	1.63						2.85	0.41	1.9	0.73						2.52	1.08	1.63	1.31						3.04	0.28	2.34	1.68
	1.63	0.57	1.58	1.32						1.17	1.31	3.05	1.4						1.65	0.24	3.42	0.06						2.09	1.33	1.86	0.69						2.17	1.49	1.63	0.98						2.08	0.68	2.57	1.29
	1.86	0.58	1.71	1.72						1.59	0.3	1.49	0.76						1.72	0.81	1.5	0.54						2.35	1.47	2.05	1.11						1.75	1.59	2.4	0.83						1.62	0.37	1.9	1.89
	2.58	1.8	1.84	0.62						1.22	1.54	2.09	1.06						1.7	0.15	1.6	1.15						2.78	0.91	1.25	0.56						1.51	1.8	1.8	0.81						1.99	1.96	1.8	0.75
	1.41	0.81	1.99	0.98						1.54	0.76	2.41	1.13						2.14	1.56	4.93	0.86						1.72	0.49	1.78	1.05						1.21	1.57	1.77	1.27						1.8	1.16	2.27	0.48
	2.07	0.47	1.62	0.91						1.55	1.26	2.5	0.69						1.44	0.65	1.63	0.85						2.23	1.3	2.14	1.23						2.6	1.72	3	0.69						2.67	0.9	1.29	1.13
	1.77	1.37	1.49	1.24						1.75	0.85	1.85	0.94						1.5	0.96	2.34	1.08						2.33	1.39	1.82	1.21						2.44	0.5	2.39	0.95						2.55	0.72	1.57	1.43
	2.24	0.24	1.77	0.77						1.92	0.36	2.07	2.4						1.22	0.66	1.4	1.18						1.38	0.57	1.79	0.84						1.17	0.35	2.95	0.97						2.06	1.62	2.91	1.18
	1.49	1.09	2.07	1.68						1.54	1.76	3.68	0.79						0.97	0.45	2.65	0.78						2.31	1.1	1.76	1.22						1.82	1.11	2.5	1.37						1.28	0.13	2.85	1.22
	1.47	1.12	2.16	1.17						1.4	1.27	1.81	0.68						1.33	0.99	1.8	0.8						1.47	0.75	2.3	0.92						1.72	0.33	1.39	0.48						1.53	0.89	2.35	1.21
	2.04	1.49	1.13	0.55						1.72	0.62	1.41	1.18						1.57	0.42	1.07	0.77						1.32	0.76	1.79	1.31						1.51	0.27	1.61	1.13						1.31	0.87	1.42	1.94
	2.25	0.64	1.39	0.83						1.2	1.67	1.31	1.48						2.02	0.41	1.8	1.29						1.92	1.09	1.51	0.8						1.46	0.44	1.94	1.39						2.14	0.94	2.07	1.1
	1.57	0.99	1.72	0.61						1.74	0.57	1.04	1.84						1.47	0.28	1.66	1.14						1.69	1.84	2.23	0.63						1.78	0.25	1.42	1.28						2.3	0.75	2.56	1.31
	2.18	1.45	2.43	1.08						1.55	0.73	1.21	1.34						1.63	0.42	1.48	0.64						1.23	0.55	1.9	0.93						1.24	0.38	2.55	0.56						1.97	2.04	2.2	0.63
	1.47	0.93	1.9	0.68						1.18	1.75	1.73	0.66						2.5	1.22	1.26	1.04						1.89	1.07	1.12	0.66						1.8	0.49	1.68	0.77						2.19	1.24	1.8	1.71
	1.76	0.21	1.75	0.75						1.4	0.94	0.88	1.1						1.41	1.25	1.75	1.05						1.63	1.05	1.88	1.08						1.13	0.9	1.96	0.45						1.73	0.28	3.12	1.25
	1.94	0.5	1.68	0.91						1.4	0.88	1.28	0.94						1.18	1.31	1.62	0.34						2.29	0.82	1.72	1.17						2.7	0.45	2.06	0.94						2.04	1.67	2.83	1.44
	1.86	0.51	1.52	1.19						1.68	0.66	1.24	1.18						1.15	1.25	1.97	0.73						1.31	0.23	1.37	1.13						1.79	0.42	1.97	0.69						1.88	0.79	1	0.79
	1.82	0.78	2.37	1						1.38	1.83	0.96	0.74						2.05	1.34	2.21	0.94						1.12	0.43	1.88	0.74						2.23	1.31	2.24	0.85						1.62	2.14	2.33	1.11
	1.27	1.04	1.31	0.58						2.36	1.18	1.39	1.04						1.17	1.09	1.4	1.09						1.65	1.16	2.04	1.3						2.12	1.59	1.94	0.81						1.33	0.3	2.62	1.36
	1.45	0.95	1.83	1.45						1.51	0.81	1.48	1.05						1.19	1.05	1.82	0.81						2.01	0.29	1.65	1.56						1.74	1.15	2.3	0.82						1.77	1.06	2.18	1.25
	1.88	1.36	1.75	0.85						1.33	0.76	1.73	1.66						1.58	1.74	1.37	1.09						1.72	0.47	1.19	0.82						1.51	0.85	2.34	1						2.01	1.33	2.15	2.13
	1.95	0.57	1.94	1.23						2.11	0.41	1.67	1.19						2.27	1.22	1.47	1.55						1.45	0.88	2.07	0.78						0.94	0.85	2.28	0.75						2.06	0.57	2.46	1.06
	1.29	1.84	1.61	0.92						1.68	0.18	2.1	1.32						1.37	1.34	2.45	1.1						3.03	0.91	1.65	1.51						1.12	2.02	1.92	0.88						1.21	0.37	2.11	1.35
	1.37	0.94	2.32	1.11						1.34	1.02	2.07	1.6						1.04	1.58	1.56	1.03						2.13	0.96	1.06	1.65						1.98	1.09	1.88	0.84						2.31	0.82	1.48	0.47
	3.22	1.79	1.74	1.89						1.45	1.14	2.08	0.62						2.13	1.93	2.37	0.52						2.36	1.22	1.81	1.16						2.33	1.26	1.64	0.86						2.5	1.09	2.93	1.25
	1.77	0.59	2.49	0.85						1.44	0.54	2.73	1.11						1.42	1.59	2.56	0.94						1.54	0.23	1.21	1.05						1.4	0.63	1.49	0.87						2.92	0.61	0.97	1.54
	2.18	1.64	1.77	0.89						1.62	0.81	2.24	1.05						1.72	0.55	1.86	1.26						2.79	1.2	2	0.74						1.11	1.47	1.71	0.77						1.82	1.22	2.93	1.03
	1.8	0.24	1.87	1.05						1.67	0.52	2.37	0.8						1.59	1.32	1.58	0.8						1.32	1.23	1.35	1.02						2.29	1.06	1.93	0.51						1.9	0.85	1.74	1.18
	1.69	0.23	2.45	0.95						2.03	0.37	1.05	1.44						1.68	1.3	1.75	1.33						2.13	1.06	2.16	0.83						2.39	0.68	2.07	1.2						3.08	0.3	2.3	0.83
	1.38	1.07	1.73	1.49						1.41	0.62	1.76	0.66						1.98	1.25	1.66	1.22						1.22	0.73	2.36	0.78						2.04	1.9	2.15	1.33						1.84	1.23	1.44	0.8
	1.25	1.37	1.97	0.99						1.55	0.68	1.84	0.85						2.06	0.3	1.82	1.23						2	0.3	1.82	0.53						1.58	0.23	2.09	0.66						2.69	0.47	2.44	1.22
	1.72	0.95	1.3	1.11						1.89	1.23	1.15	0.27						2.03	0.46	2.19	0.65						2.44	0.93	1.56	0.76						3.57	0.21	1.5	1.59						2.7	0.61	2.48	1.03
	1.39	0.82	2.03	0.68						1.91	0.4	1.9	0.92						1.83	0.45	1.74	1.06						1.98	1.4	1.65	1.29						2.72	0.88	1.8	1.13						2.83	0.25	2.09	1.11
	1.34	0.26	1.8	1.14						1.84	0.3	1.76	0.67						1.63	1.12	1.99	0.56						1.83	1.04	1.6	1.43						1.19	0.88	1.96	1.17						2.9	0.52	1.98	0.62
	1.59	0.99	1.93	1.23						1.63	0.53	1.21	1.15						2.52	1.12	1.89	1.53						1.59	0.23	2.26	0.94						2.41	1.21	2.04	1.06						1.7	0.5	2.35	0.96
	1.74	0.48	1.4	1.16						2.07	1.65	1.8	1.08						1.9	0.23	1.23	0.88						1.96	0.86	1.81	0.59						2.6	1.36	1.17	1.05						1.9	0.25	2.23	1.06
	1.44	1.41	1.61	0.66						1.76	0.22	2.03	0.87						1.31	1.12	1.21	0.47						1.13	1.1	1.51	1.64						1.27	0.22	1.92	0.91						1.95	1.71	2.27	1.54
	2.15	1.12	2	0.79						1.51	1.02	2.11	0.84						1.34	1.05	1.4	1.26						2.03	1.01	1.54	1.23						1.47	0.2	2.52	1						2.21	1.47	2.04	1.12
	1.44	0.9	1.63	1.05						1.21	1.59	1.11	0.84						2.06	0.74	0.94	1.37						1.51	0.41	1.58	1.15						1.88	1.12	2.68	1.81						1.58	0.61	1.79	0.9
	1.51	1.27	3.84	1.18						1.83	0.87	1.68	1						1.39	1.19	2.06	1.19						1.99	0.84	1.99	0.83						1.89	1.02	1.55	0.53						1.62	0.53	1.75	1.15
	2.21	0.79	2.36	1.33						1.61	1.24	1.95	0.97						1.92	0.74	1.86	1.74						1.23	1.53	2.38	0.93						2.17	1.11	1.8	1.55						2.68	0.98	1.89	1.05
	1.8	1.25	1.66	0.88						1.37	1.05	1.57	1.57						1.88	1.55	1.98	1.39						1.58	1.23	1.89	1.04						2.05	0.77	1.28	0.4						1.24	0.77	1.75	1.52
	1.35	0.87	1.34	0.96						2.14	0.53	1.99	0.95						1.43	1.43	1.67	0.55						1.47	1.03	2.15	1.13						2.02	1.48	2.04	1.18						1.42	0.43	1.84	1.21
	2.04	0.39	1.71	0.83						1.19	1.75	2.35	0.9						2.53	1.51	3.49	1.04						1.75	1.34	2.35	0.68						1.09	0.98	1.77	0.7						2.01	1.2	1.28	0.52
	1.72	0.25	1.55	1.18						1.44	1.14	1.84	0.77						1.99	0.47	1.42	1.45						1.32	0.95	1.94	1.06						1.2	0.2	1.79	0.52						1.44	0.54	2.04	0.95
	2.15	0.73	1.75	1.01						1.51	0.9	1.33	1.06						1.73	0.81	1.47	0.92						2.5	1.26	1.59	0.69						2.42	0.69	2.26	0.85						2.09	1.02	2.07	1.87
	1.97	0.32	1.57	1.14						0.98	1.29	2.27	1.37						1.76	1.08	1.8	1.07						1.25	0.72	2.3	0.98						2.66	0.18	1.77	0.92						1.49	0.3	2.63	0.97
	1.6	1.46	1.99	1.18						1.25	1.47	1.59	1.27						1.63	1.07	1.47	0.74						2.61	1.12	1.99	0.51						2.1	1.27	2.08	0.9						1.71	0.29	1.53	1.42
	1.72	0.24	2.3	0.94						1.8	0.35	2.95	0.86						1.27	1.07	1.15	0.89						1.96	0.41	1.86	0.73						1.72	0.17	1.53	0.67						2.66	1.42	2.45	0.98
	1.72	0.35	1.54	1.06						2	1.54	2.36	0.91						1.76	0.53	1.01	1.59						1.92	0.82	1.5	0.85						1.67	1.2	2.03	0.54						2.25	0.77	3.45	0.86
	2.42	0.33	1.78	0.91						1.25	1.62	1.44	0.81						2.26	1.64	1.22	0.81						1.4	0.85	1.92	1.06						2.46	0.78	2.07	1.25						1.5	0.55	1.59	0.48
	1.44	0.89	2.11	1.09						1.71	0.43	1.16	0.56						0.93	1.35	1.94	0.9						1.56	0.61	2.22	1.23						2.09	1.03	2.55	0.92						1.61	0.21	1.48	0.99
	1.66	0.84	1.32	0.99						2.23	1.62	1.71	1.36						1.9	1.07	1.61	1.03						1.69	1.03	1.41	1.06						1.4	0.9	1.67	1.76						1.83	1.08	2.27	1.12
	1.41	1.01	1.66	1.05						1.75	0.52	2.26	1.34						1.84	0.94	1.8	0.83						1.11	0.8	2.1	0.85						1.75	0.92	1.79	1.44						3.7	0.41	2.74	0.64
	1.5	0.83	1.5	0.41						1.16	2.17	1.47	0.8						1.96	0.6	2.33	1.04						1.86	1.03	1.64	1.09						2.53	0.94	2.31	0.6						1.08	0.44	3.02	0.48
	1.72	0.61	1.11	1.35						1.71	0.64	1.4	0.65						1.31	1.84	1.63	0.73						1.6	0.52	2.95	1						1.75	1.48	1.51	1.62						1.74	0.28	1.56	0.76
	1.19	1.56	1.39	0.95						1.09	0.83	1.07	1.3						2.06	0.92	1.82	1.68						2.65	1.42	2.09	1.86						1.72	1.41	2.64	1.28						1.34	0.89	2.6	1.1
	3.09	1	0.96	0.81						0.96	1.24	1.8	0.55						1.37	0.42	1.56	0.58						1.55	0.37	1.7	0.41						1.75	0.1	1.67	0.83						2.64	0.59	2.31	1.1
	1.69	1.28	1.88	0.73						1.41	1.21	2.11	1.17						1.78	1.73	1.95	0.74						2.26	0.92	1.57	0.85						1.71	1.12	1.93	0.99						2.48	2.5	2.55	0.89
	1.79	0.86	1.24	2.03						2.95	2.03	0.97	1.48						2.26	0.82	1.75	0.99						1.93	1.25	1.63	1.04						3.08	0.19	2.79	1.37						2.63	1.58	2.78	0.83
	1.42	0.84	1.43	0.7						0.96	1.04	1.24	0.79						1.93	1.47	1.98	0.8						1.33	1.25	1.56	0.95						1.81	1.35	2.12	0.53						2.19	1.1	2.5	1.32
	1.66	0.59	2.01	1.2						1.48	0.67	1.42	1.25						1.2	1.43	1.55	1.06						2.63	0.96	1.47	0.99						1.62	0.71	1.93	0.83						2.23	1.82	2.22	0.81
	1.87	0.33	1.8	0.97						1.23	1.82	1.04	1.32						1.48	0.61	1.26	0.73						1.54	1.32	2.31	0.91						2.15	1.26	1.67	0.46						3.09	0.81	1.61	0.82
	2.14	0.73	2.03	0.75						1.22	0.88	2	0.73						1.56	0.75	1.47	1.76						2	0.94	2.47	0.91						1.32	0.38	2.3	1.05						2.55	1.17	2.06	0.77
	1.19	0.88	1.55	1.78						1.24	1.44	1.18	1.05						1.11	1.1	1.47	0.9						1.67	0.21	2.12	1.3						1.23	0.51	1.61	1.2						2.29	1.58	1.92	1.47
	1.26	1.27	1.94	1.15						1.85	0.35	2.52	1.41						1.07	0.88	1.04	0.5						1.08	1.17	2.49	0.59						2.65	0.9	1.84	1						2.52	1.54	1.75	0.79
	1.09	1.03	2.05	1.24						2.14	0.81	1.08	1.72						1.86	1.23	1.48	1.18						1.34	1.02	2.4	1.33						2.53	0.58	2.03	0.85						2.17	0.98	1.68	0.88
	1.06	1.12	1	1.07						1.9	0.2	1.27	1.04						1.84	0.24	2.21	0.82						1.06	0.67	1.96	1.25						2.1	1.02	1.37	1.23						1.63	0.91	2.26	1.09
	1.51	0.16	1.3	0.44						1.18	0.25	1.61	1.34						1.88	0.18	1.83	0.74						1.55	1.81	1.16	1.72						1.66	0.29	1.93	0.52						1.08	2.64	2.62	1.26
	1.22	0.93	1.5	0.38						1.73	0.34	1.74	1.23						1.85	0.85	1.86	0.77						1.54	0.24	2.4	1.08						1.67	0.68	3	1.1						1.49	0.45	2.49	1.02
	1.59	1.14	1.63	0.98						2.14	1.26	2.25	0.98						1.86	1.31	1.53	0.97						1.56	1.11	1.55	0.89						3.26	0.31	1.37	0.82						1.68	1.57	2.02	1.2
	1.59	1.19	1.68	0.68						1.75	0.28	1.26	0.64						2.27	1.54	1.06	0.67						1.64	0.87	2.16	1.07						1.98	0.43	1.74	1.62						2.96	0.5	1.74	1.55
	1.16	1.41	2.22	1.1						4.62	1.13	2.88	0.5						1.31	1.48	1.8	1.01						1.7	0.34	2.36	0.94						2.56	0.62	1.57	0.86						1.12	0.64	2.93	0.67
	1.88	0.25	1.77	0.46						1.95	0.21	1.66	0.87						1.31	1.72	2.01	1.21						2.07	1	3.73	1.01						1.57	0.37	1.91	1.69						1.54	1.98	2.81	1.09
	1.19	0.86	1.64	1.51						1.09	1.49	1.16	1.04						2.01	1.14	1.72	0.67						1.29	1.07	1.83	1.48						1.86	1.09	2.77	0.9						1.6	1.12	1.25	1.31
	1.75	0.39	1.22	1.23						1.01	0.92	2.01	0.54						1.13	0.99	1.11	0.72						2.21	1.36	1.56	0.73						1.75	1.34	2.75	0.83						2.12	1.51	2.04	1.05
	1.86	1.13	1.59	1.04						1.9	0.52	1.58	0.83						1.36	0.81	1.63	0.96						1.99	0.98	1.21	1.79						2.43	1.32	2.03	0.73						2.64	1.62	1.67	0.88
	1.98	0.98	1.97	1.04						2.27	1.06	1.78	1.24						1.29	1.27	2.06	0.96						1.57	0.37	1.78	1.86						1.46	1.61	2.48	1.03						2.02	0.84	1.68	1.2
	0.99	1.48	1.39	0.67						1.51	1.03	1.51	1.1						1.33	1.41	1.33	1.35						1.32	1.35	1.76	0.92						2.47	1.15	1.63	0.81						1.35	0.51	2.31	0.42
	1.88	0.64	1.46	1.11						2.29	1.02	1.72	1.38						1.35	0.81	2.03	0.61						1	2	1.68	0.72						0.97	2.03	1.82	0.97						1.46	0.78	2.24	0.56
	1.74	1.07	2.13	1.06						1.46	2.13	1.5	1.23						2.38	1.23	2.24	0.88						2.13	1.54	1.52	1.63						1.79	1.13	1.78	0.79						1.14	0.75	2.16	1.17
	3.02	1.26	1.81	1.22						1.09	0.35	1.7	0.95						2.13	1.02	1.63	0.55						2.09	1.28	2	1.32						1.18	1.33	2.14	0.89						2.56	0.85	1.58	0.57
	1.33	1.66	3	0.87						1.79	0.72	1.14	0.67						1.51	0.79	1.29	1.02						2.03	0.84	2.12	0.42						2.23	1.39	2.42	1.13						1.48	1.54	1.84	2.19
	1.81	0.83	2.32	1.16						1.79	0.53	1.8	1.19						1.44	1.26	1.46	0.96						3.48	0.36	1.83	1						1.7	0.32	1.61	1.01						1.93	1.4	2.08	0.96
	0.91	1.39	2.49	0.94						1.98	0.37	2.04	1.28						1.8	0.82	1.62	1.17						1.13	1.98	1.77	0.79						1.54	0.71	2.56	1.28						1.37	1.74	1.8	1.54
	1.62	0.92	1.72	1.09						1.57	1.77	1.16	0.41						1.78	1.11	1.38	1.26						2.06	1.13	1.29	0.8						2.58	1.36	1.85	0.83						1.4	0.37	2.29	0.96
	3.09	2.46	1.61	0.71						1.6	1.67	1.52	1.53						2.25	0.79	1.74	1.07						1.97	1.74	2	1.04						1.22	1.72	1.74	0.97						2.91	1.26	1.18	1.88
	1.81	0.94	1.68	1						2.15	1.66	2.46	0.92						2.05	1.23	1.6	1.03						2.23	1.77	2.31	1.15						2.44	0.95	1.31	0.55						2.14	1.25	2.05	1.9
	2	0.91	2.62	0.97						0.88	1.94	2.96	1.05						2.16	1.19	1.69	0.94						2.11	0.48	1.33	1.8						2.69	0.33	1.35	1.32						1.85	2.24	1.88	1.04
	1.96	0.32	2.32	1.21						2.01	0.26	1.09	1.01						2.92	1.21	1.55	1.3						1.68	1.23	1.57	1.33						2.34	1.22	2.08	1.52						1.93	0.22	1.84	0.96
	1.66	0.56	1.88	0.81						1.36	0.72	1.16	0.42						1.75	0.4	1.61	0.56						0.93	2.02	1.61	1.26						1.94	1.32	1.85	0.78						2.17	1.39	2.22	0.98
	3.8	1.21	1.68	0.8						1.55	1.11	2.25	0.67						1.99	0.33	1.54	0.6						1.4	0.27	1.87	1.3						1.64	0.43	3.2	0.95						1.64	0.31	2.21	1.26
	1.77	1.98	1.53	1.05						1.42	0.93	1.51	1.45						1.58	0.81	1.84	1.04						2.22	1.11	1.59	0.77						1.03	1.02	3.94	1.14						2.3	1.06	2.08	1.31
	1.93	0.93	1.53	0.68						1.47	0.57	1.42	0.83						2	1.43	1.61	0.78						1.52	0.84	1.15	1.46						1.45	0.08	1.24	0.63						2.83	0.48	2.21	1.32
	1.32	1.28	2.38	0.85						1.3	1.06	2.27	0.68						1.61	2.17	1.47	1.72						2.48	1.15	1.24	1.18						1.79	1.12	2.35	0.61						1.56	0.59	1.45	1.44
	1.61	1.54	1.78	0.82						1.27	0.48	2.28	1.25						1.75	0.22	1.7	0.53						1.14	1.55	2.95	0.88						3.02	0.85	1.37	0.58						2.32	1.3	1.95	0.89
	1.07	1.4	1.67	1.07						1.27	1.93	2.05	1.09						1.09	0.24	1.66	1.46						1.81	1.23	1.45	1.46						2.48	1.26	2.06	0.87						1.88	0.93	2.98	1.08
	1.57	0.92	3.38	1.31						1.29	0.88	2.83	1.18						1.18	1.22	2.66	0.78						1.46	1.18	1.8	0.79						1.78	1.26	1.54	0.79						2.05	1.5	2.33	0.97
	1.24	1.3	1.18	0.95						1.65	0.6	1.91	0.69						2.26	2.09	1.09	0.91						1.6	1.49	2	1.04						2.81	0.51	1.04	0.5						2.44	0.49	2.46	1.16
	1.55	1.54	1.52	2.08						0.91	0.52	2.44	0.86						1.82	0.46	2.22	1.24						1.07	1.71	1.3	2.17						2.22	1.39	2.64	0.75						2.79	0.97	2.02	0.88
	2.22	0.78	1.17	1.58						1.43	1.49	1.8	1.36						1.37	1.67	4.77	0.94						1.28	1.59	1.74	1						1.34	0.98	2.67	0.68						2.81	0.42	2.46	0.76
	2.13	0.08	1.23	0.58						1.34	0.34	1.88	0.76						1.46	0.98	3.96	0.86						1.48	0.6	1.78	0.7						2.49	0.91	2.01	1.11						1.71	2.06	1.73	0.56
	1.13	1.22	1.85	1.41						2.01	0.25	1.28	0.66						2.26	0.69	1.31	0.66						1.25	1.03	1.22	1.42						1.53	0.35	2.12	1.25						2.33	1.02	1.63	1.44
	2.15	0.21	1.28	0.64						1.28	1.32	1.32	0.81						2.12	0.88	1.52	0.58						0.89	0.35	1.24	0.89						1.8	1.59	2.65	0.6						2.36	0.99	2.27	1.27
	1.31	1.71	2.5	1.13						2.18	1.19	1.69	0.91						1.57	0.16	1.7	0.75						1.02	0.82	1.76	1.35						1.61	0.34	1.19	1.56						2.29	1.23	2.58	1.47
	1.93	0.64	1.68	0.97						1.72	0.78	1.66	1.48						1.29	0.8	1.96	0.97						1.44	0.29	1.57	1.41						1.52	1.17	2.76	1.1						2.45	0.99	0.93	1.03
	1.64	0.32	2.93	0.93						2.01	0.9	1.9	0.8						1.22	1.2	1.51	1.23						2.41	1.78	1.74	0.8						1.63	0.29	1.41	0.84						1.79	0.89	1.81	1
	1.71	1.36	1.76	0.79						1.87	1.48	1.63	1.24						2.84	0.54	1.59	0.74						2	0.88	1.51	1.14						1.66	1.13	1.63	1.19						2.2	1.57	1.8	1.07
	2.1	0.41	2.24	1.34						1.17	1.36	2.11	1.16						1.06	1.46	1.6	1.47						1.8	0.5	1.6	1.03						0.91	0.83	1.44	0.94						2.51	0.33	2.44	1.54
	1.35	1.53	1.52	1.39						1.06	1.87	2.25	0.58						1.57	1.23	2.38	1.68						3.63	1.19	1.65	0.7						1.54	0.21	2.09	0.85						1.38	0.47	2	0.56
	2.23	0.99	1.43	1.49						1.3	1.51	1.2	0.05						1.85	0.21	2.23	1.08						3.01	1.02	2.44	1.22						2.59	1.06	1.43	1.04						2.68	0.87	1.92	1.14
	1.98	1.45	1.36	1.28						1.56	1.06	1.61	1.41						1.42	0.9	1.62	0.82						1.98	0.97	1.22	1.28						1.88	1.53	1.46	0.7						1.77	1.33	2.8	0.97
	1.7	1.41	1.77	0.7						1.73	0.76	2.15	0.7						1.58	1.31	1.27	0.48						1.47	0.57	2.05	0.9						1.29	1.89	1.82	0.84						1.46	0.79	2.06	0.77
	1.34	1.15	1.54	0.81						2.26	1.27	2.11	0.97						1.93	1.43	2.44	0.53						1.01	2.72	1.73	2.52						1.96	0.75	1.81	1.22						1.84	0.32	2.05	1.53
	2.17	0.32	1.56	0.89						1.2	1.16	1.16	0.52						1.56	1.04	1.58	0.53						1.55	0.38	2.2	0.94						1.61	1.7	2.79	1.23						1.92	1.26	1.61	1.46
	1.8	0.85	1.6	0.79						1.42	1.27	1.37	1.09						1.57	0.31	2.27	0.73						2.79	1.05	1.37	0.89						1.7	2.11	2.3	1.01						1.74	1.2	2.31	0.8
	1.14	1.39	1.66	1.02						1.4	1.27	1.57	1.06						2.13	0.31	1.98	0.92						2.03	0.81	2.17	0.59						2.15	0.21	1.63	1.1						2.56	1.22	2.95	1.37
	3.78	0.81	1.6	1.13						1.88	0.4	1.97	0.81						1.75	0.79	1.52	1.17						2.03	1.29	1.75	1.05						2.66	1.05	4.14	0.65						2.45	2.35	2.65	0.76
	1.66	0.96	1.36	1.64						2.01	0.8	1.41	1.72						1.45	1.03	1.45	0.63						1.45	2.82	2.05	1.04						2.11	1.1	1.31	0.94						1.04	0.99	1.61	0.64
	2.59	1.23	1.55	0.92						1.79	0.8	1.27	1.08						1.6	0.26	1.69	1.29						2.03	1.59	1.78	0.94						1.24	0.25	1.56	1.37						3.18	0.48	2.68	1.43
	0.99	0.32	1.86	1.1						2.34	0.84	1.12	0.63						2	1.7	1.37	0.73						2.22	1.44	1.28	0.8						2.44	0.68	1.41	1.24						1.93	1.44	1.63	1.01
	1.72	1.34	4.19	0.74						1.62	1.12	1.93	1.02						1.75	0.29	2.89	0.84						1.06	0.15	1.82	1.37						2.31	0.86	2.39	1.24						2.49	1.42	2.32	1.07
	1.39	0.97	1.6	1.17						1.26	0.86	2.55	0.89						1.7	0.87	1.51	1						1.21	1.91	1.23	1.15						2.76	0.48	1.92	0.56						2.34	0.98	1.87	1.26
	1.97	0.8	3.15	0.47						1.48	1.53	1.76	2.33						1.54	1.66	2.01	1.49						1.06	1.4	1.59	1.05						2	1.79	4.12	1.35						2.1	1.65	1.79	0.06
	1.04	0.45	1.5	0.7						1.48	1.7	1.68	0.88						1.46	1.14	1.74	0.85						1.99	1.66	2.32	1.14						1.92	2.17	1.56	1.54						1.18	1.68	1.91	1.56
	2.03	0.5	1.18	1.17						1.45	0.39	1.69	1.07						1.76	0.81	2.08	1.03						1.56	0.95	1.09	1.16						2.05	1.41	1.94	1.11						2.17	2.15	2.37	0.91
	1.99	0.49	1.71	0.85						2.32	1.83	1.45	1.3						1.7	0.48	1.47	1.5						1.77	1.68	2.24	0.89						2.45	1	2.19	0.7						1.38	0.27	1.35	0.93
	1.4	0.72	1.63	0.82						2.01	1.68	1.29	0.69						1.83	1.96	1.78	0.95						2.39	1.33	1.61	0.96						1.74	1.07	1.82	0.8						1.78	0.31	2.02	0.78
	1.38	1.01	1.53	1.47						1.44	1.07	1.5	1.5						1.24	1.17	1.21	0.29						1.29	0.71	2.03	1.41						1.83	1.15	1.75	0.67						1.77	1.25	2.21	0.9
	1.4	1.09	1.94	0.95						1.23	0.84	2.22	0.92						1.53	0.3	1.69	0.72						1.33	0.27	2.36	0.81						2.13	1.27	2.02	0.69						1.54	0.35	1.86	1.83
	1.68	1.3	1.81	1.15						1.94	1.48	1.52	0.9						1.22	1.14	1.67	1.33						2.17	1.51	2.47	1.36						1.41	1	1.16	0.71						1.27	0.55	1.73	0.75
	1.94	0.23	1.8	1.41						1.59	1.13	1.65	0.99						0.95	0.59	1.48	0.82						1.96	1.02	1.9	1.03						2.13	1.72	2.13	1.43						1.5	1.12	1.66	1.71
	2.11	0.3	1.81	0.86						1.77	0.33	2.36	0.73						3.21	0.72	1.22	1.01						1.56	0.89	1.55	0.67						1.35	0.64	1.43	0.86						1.2	0.97	2.05	1.36
	2.27	0.32	1.56	0.78						2.32	0.36	1.79	1.62						2.51	1.36	2.14	0.79						2.06	0.85	1.65	0.69						1.49	0.18	1.81	1.03						2.17	0.88	2.6	0.98
	1.2	1.53	1.62	1.29						1.21	0.75	1.89	1.62						2.02	0.38	2.45	0.88						1.43	0.34	2.72	1.13						1.7	0.3	1.84	1.29						1.56	1.57	2.3	0.59
	1.37	2.43	2	0.89						1.29	2.49	1.11	1.39						1.93	0.31	2.14	0.63						2.45	1.16	2.76	0.86						1.78	1.31	1.74	1.56						1.47	0.49	1.7	1.34
	1.86	0.84	1.23	1.11						2.24	1.61	1.17	1.65						1.28	0.94	1.43	1.14						1.5	0.41	2.49	1.05						2.85	0.66	2.7	0.73						2.51	0.47	1.19	1.2
	1.84	0.95	2.25	1.03						2.15	0.32	1.69	0.84						1.87	1.71	1.82	1.04						2.09	0.34	2.24	0.9						1.99	1.48	1.82	1.01						1.84	1.45	2.29	1.1
	1.58	0.8	2	1.03						1.32	1.23	2.19	1.18						1.43	1.34	1.49	1.23						1.31	0.19	1.67	1.67						1.94	1.46	2.2	0.84						1.96	1.2	1.89	0.48
	1.09	1.6	1.94	0.89						1.86	2.07	1.7	1.84						1.65	0.29	1.64	1.11						2.17	1.44	2.69	1.43						2.35	1.46	2.69	1.36						2.69	0.94	2.11	1.13
	2.09	0.53	1.48	1.06						1	0.5	1.63	1.31						2.67	1.2	1.99	1.25						2.07	1.15	2.3	0.92						2.22	1.46	3.62	1.01						1.95	1.72	2.79	0.95
	1.49	0.91	1.52	1.01						1.34	0.62	1.59	1.08						1.91	1.14	1.4	0.63						2.47	1.49	1.7	0.72						1.47	1.39	1.77	1.05						2.16	1.54	2.71	1.27
	1.36	0.9	1.61	0.61						1.52	1.38	1.09	1.24						1.51	0.81	1.5	0.7						1.07	1.18	1.74	1.33						2.06	1.22	0.94	1.62						2.19	1.96	3.11	1.9
	1.53	1.67	3.19	1.04						1.51	1.1	1.65	1.15						1.45	1.26	2.21	0.77						2.45	1.07	1.47	1.22						2.01	1.35	2.6	1.13						2.16	1.92	1.85	1.01
	1.28	1.09	2.27	1.33						1.59	0.56	1.1	0.92						1.71	0.14	2.3	0.96						2.43	1.33	3.02	1.09						1.42	1.68	1.29	1.48						1.55	0.48	2.41	0.94
	1.64	1.07	1.45	0.69						1.15	1.34	1.87	1.26						1.41	1.86	2.64	1.16						1.67	1.24	1.19	1						1.53	1.17	1.84	0.65						1.66	1.51	1.87	1.8
	2.01	1.17	2.41	0.74						1.2	1.02	1.84	0.49						1.71	0.52	2.33	0.51						1.98	1.7	1.65	1.47						2.94	0.53	1.98	0.96						2.55	1.34	2.07	1.31
	1.64	0.59	1.83	1.35						2.01	0.77	1.9	1.19						1.39	1.53	2.77	1.34						1.49	0.13	1.26	0.73						1.4	0.61	2.14	1.3						2.24	1.41	1.9	1.19
	1.97	0.36	3.33	0.66						1.65	0.17	0.84	1.05						1.7	0.36	2.1	0.84						1.89	0.54	1.4	1.48						2.6	0.4	2.8	0.72						1.67	0.54	2.83	1
	2	1.79	2.14	1.39						1.37	0.59	1.5	0.82						2.46	1.13	2.57	1.2						1.72	0.36	1.66	0.62						1.94	1.35	1.38	0.97						1.98	0.52	1.95	1.14
	1.97	0.73	1.16	1.14						1.74	0.27	1.07	1.22						1.33	1.38	1.22	1.04						2.23	1.38	1.93	1.38						2.55	1.4	1.7	0.89						1.42	1.07	2.21	0.85
	1.54	1.47	1	0.97						1.33	1.15	1.22	0.7						2.34	1.29	1.21	0.89						1.54	0.74	2.33	0.96						1.63	0.52	2.11	1.43						1.97	0.64	2.5	0.74
	1.46	1.41	2.7	1.21						1.33	1.01	1.35	1.79						3	0.79	2.57	1.07						1.95	1.31	1.41	0.79						1.85	0.99	1.45	0.76						1.35	0.81	3.65	1.63
	1.18	1.68	2.88	0.67						0.88	1.21	1.37	1.31						1.56	1.41	2.92	0.81						1.04	1.8	1.53	1.01						2.26	1.02	2.41	0.88						2.07	1.08	2.56	1.63
	1.23	1.21	2.7	0.57						1.43	0.44	1.8	0.74						1.86	0.62	1.88	1.41						2.55	0.75	1.95	1.2						1.14	0.7	1.11	0.75						1.57	0.13	1.38	1.29
	1.2	0.42	1.81	2.81						1.63	0.37	1.59	0.68						2.24	1.3	1.07	1.37						2.23	1.22	2.44	0.9						1.21	1.11	1.27	0.96						2.06	1.01	2.48	0.84
	1.46	1.19	1.43	0.72						1.48	1.13	1.35	0.92						1.62	0.84	1.92	1.12						1.68	0.23	2.2	0.77						2.04	1.66	1.42	1.72						1.65	0.49	2.81	1.49
	1.54	1.12	2.08	0.98						1.69	0.44	2.53	1.04						1.72	0.95	3.21	1.51						1.6	0.34	1.59	1.05						1.88	1.79	1.74	1.47						2.25	0.92	2.63	0.93
	1.47	1.2	1.01	1						2.38	0.77	1.65	1.29						1.13	0.71	1.33	0.54						1.69	1.44	1.66	1.71						1.35	1.41	2.09	0.69						1.32	0.53	2.75	1.41
	1.47	1.45	1.85	1.05						1.71	0.81	0.93	0.98						2.25	1.05	1.81	1.07						2.25	0.96	2.63	1.32						2.41	0.83	2.01	1.08						3.2	0.61	2.19	1.42
	1.25	1.82	1.1	1.38						1.7	0.87	1.07	0.58						1.3	1.55	1.29	0.5						1.13	1.63	2.69	0.85						2.8	0.97	2.13	0.81						1.68	0.73	1.84	1.01
	1.65	1.15	3.07	1.22						1.54	1.14	1.39	1.61						1.24	1.12	1.49	0.53						2.37	1.44	1.44	0.94						2.2	0.73	2.03	0.93						1.53	0.41	2	0.66
	1.38	0.93	2.2	0.94						1.43	1.72	0.96	1.34						1.57	2.7	1.06	0.36						1.36	0.37	1.63	0.7						1.38	0.15	1.35	1						2.61	0.76	1.8	0.86
	1.52	1.11	2.15	0.61						1.27	1.73	2.02	0.8						1.88	1.52	1.45	0.57						1.25	0.29	1.5	1.01						1.66	1.5	1.84	0.79						2.08	0.95	1.35	0.76
	1.64	0.77	1.31	0.92						1.08	1.5	1.99	1.6						2.32	1.23	1.46	0.74						1.19	0.36	1.62	1.1						1.57	0.53	2.34	0.9						1.74	0.65	2.47	0.78
	1.36	1.15	1.58	0.91						1.75	0.18	1.57	1.27						2.18	1.06	1.65	1.15						1.93	0.34	1.54	1.79						1.97	1.6	1.83	1.47						2.39	1.44	2.27	1.19
	1.97	0.32	1.85	0.63						1.75	0.28	1.41	0.55						1.73	1.91	1.35	0.87						1.93	1.84	2.06	0.89						1.45	1.39	1.8	1.19						1.42	0.37	2.3	0.66
	1.25	1	1.17	0.78						1.4	1.63	1.81	1.08						3.19	0.4	2.25	0.58						1.08	1.16	2.3	0.99						1.58	0.33	1.56	1.09						3.09	0.38	2.11	1.16
	2.01	1.18	1.39	1.33						1.41	0.96	1.07	1.44						5.59	0.53	1.94	0.72						2.29	0.93	2.02	0.59						1.95	1.5	2.42	0.93						2.43	1.05	2.34	1.05
	2	1.09	1.7	0.95						1.67	1.1	1.41	0.94						1.66	2.12	2.28	0.79						1.8	1.4	2.29	0.82						2.17	1.01	1.6	0.83						1.89	1.52	2.49	1.23
	1.43	1.18	1.95	0.77						1.87	0.43	1.58	1.1						1.49	0.34	1.53	1.07						1.8	0.94	1.45	0.83						2.45	0.85	1.4	0.69						2.22	1.35	1.91	0.8
	1.71	0.91	1.53	0.74						1.65	0.28	1.24	0.51						1.38	0.97	1.15	1.03						1.56	0.53	2.34	0.89						2.34	0.91	2.04	0.63						1.77	0.17	3.56	1.11
	2.1	1.31	1.52	0.43						1.61	0.59	1.29	1.04						1.96	0.27	1.18	0.41						1.33	1.08	2.35	0.76						1.66	1.42	1.97	1.23						2.29	0.29	1.99	1.09
	2.29	1.26	2.22	0.99						1.92	0.91	1.47	0.72						1.33	1.11	2.13	1.17						1.36	1.2	1.41	1.38						2.16	24	1.62	1.09						2.94	0.37	2.5	1.13
	1.43	1.78	1.18	0.43						2.6	0.8	2.24	1.12						1.8	1.4	1.6	1.82						1.77	0.55	0.98	1.26						2.82	0.78	2.31	0.85						1.74	0.32	1.62	1.26
	1.44	1.62	2.28	1.01						1.7	0.51	1.5	0.64						1.38	0.63	1.46	1.12						1.6	1.11	1.51	0.94						2.48	0.85	1.77	1.06						2.38	1.1	2	0.76
	1.37	1.11	1.74	1.06						1.58	0.98	2.83	0.87						1.97	1.12	1.59	1.29						1.74	1.35	1.33	0.63						1.7	1.69	2.72	0.93						1.48	0.42	2.01	0.86
	1.02	1.88	2.63	1.12						1.58	1.31	1.33	0.65						2.09	2.11	1.81	1.23						1.91	0.94	1.42	0.52						2.51	0.91	1.8	0.83						1.1	1.7	1.67	0.77
	1.5	1.17	1.16	0.56						1.23	0.98	1.31	0.74						2.01	0.43	1.39	1.56						2.96	1.34	1.47	1.91						1.88	1.75	2.96	1.47						2.49	1.19	3.47	0.75
	1.57	1.28	1.91	0.99						1.55	0.98	1.93	0.76						1.43	0.94	1.36	0.58						2.07	0.88	2.12	0.92						2.29	0.26	1.79	1.08						2.04	1.02	1.63	1.01
	1.32	2.09	1.2	0.62						1.33	1.28	1.84	1.48						2.47	1.46	2.23	0.89						2.86	0.9	1.91	1.05						1.32	0.26	1.65	0.97						1.33	0.74	1.54	0.8
	1.56	1.34	1.45	0.99						1.93	0.63	1.71	0.8						2.14	1.03	1.25	1.2						2.09	1.49	2.56	0.77						2.02	1.18	2.39	0.91						2.15	1.01	2.19	0.98
	1.31	1.14	2.16	0.8						1.25	0.73	1.46	0.55						1.17	0.95	1.89	0.76						1.62	0.29	1.09	0.87						1.65	1.5	2.29	1.2						2.71	0.27	1.75	0.53
	1.75	0.77	1.49	1.26						1.78	1.02	1.89	1.02						1.15	1.36	1.35	0.63						2.08	0.88	1.87	0.77						1.78	1.61	2.02	1.18						1.6	0.3	2.09	0.74
	1.77	1.43	1.92	1.15						2.34	1.07	0.97	0.42						1.78	0.4	1.82	0.82						1.04	1.09	1.66	0.99						2.49	0.66	2.41	1.46						1.57	0.22	1.79	0.88
	1.29	1.02	1.39	1.07						2.07	0.96	1.08	1.57						0.95	2.77	1.29	0.91						1.86	1.68	2.01	0.5						1.71	1.46	1.07	0.99						3.37	0.17	1.64	0.86
	1.87	0.43	2.25	1.35						1.64	0.22	2.21	0.98						2.34	1.64	1.48	0.87						1.49	0.48	2.13	1.02						2.32	0.83	1.85	0.66						2.43	1.27	3.81	1.16
	1.69	0.82	1.98	1.59						1.16	1.63	1.68	0.81						2.52	1.13	1.36	0.63						1.85	1.05	1.85	0.78						2.45	1.09	1.98	0.76						2.61	0.44	2.36	1.19
	1.51	0.47	2.02	0.88						1.78	0.34	1.56	1.05						2.26	1.31	1.69	0.68						1.33	0.29	2.12	1.01						2.23	0.88	1.3	1.82						3.34	0.31	2.22	0.86
	1.99	0.21	1.38	0.83						1.49	0.4	1.96	1.24						1.28	1.7	1.76	0.65						1.98	1.31	1.53	1.64						1.35	0.17	2.05	1.13						1.86	0.9	1.95	1.07
	1.66	1.02	1.91	0.93						1.17	1.31	1.13	0.64						1.35	0.97	2.16	1.01						1.56	1.61	2.55	1.45						1.71	0.91	2.45	0.3						1.2	1.27	2.12	1.61
	1.94	0.98	1.45	0.99						1.74	0.42	1.26	0.88						1.43	0.54	1.52	1.11						1.52	0.74	1.46	0.95						2.3	1.34	1.67	0.73						2.07	1.64	1.47	0.6
	1.32	0.85	1.54	0.99						1.95	0.45	0.97	0.58						1.68	1.3	1.47	0.89						1.43	1.13	1.9	0.74						2.97	0.91	2.5	2.16						2.51	1.63	1.76	0.93
	1.65	0.73	1.99	0.7						1.56	1.06	2.46	0.99						1.57	1.31	2.95	0.93						1.82	1.04	2.06	1.11						1.39	0.58	2.17	0.69						2.04	0.6	1.92	1.47
	1.08	1.13	2.03	0.99						1.38	0.67	2.72	0.68						1.68	0.63	1.85	0.93						1.36	0.66	1.31	1.59						2.28	0.94	1.44	1.1						1.88	0.29	1.68	0.77
	1.74	0.92	1.92	1						1.7	0.32	2.16	1.36						2.07	1.46	1.55	1.3						2.3	1.36	1.59	0.81						2.81	0.91	1.82	1.3						1.87	1.09	2.61	1.23
	1.33	1.55	2.92	1.46						1.08	1.22	2.06	0.85						1.83	0.96	2.23	1.15						1.38	1.17	1.54	1.02						1.97	1.48	1.39	0.77						1.9	1.34	2.43	0.85
	1.19	1.85	1.71	1.18						1.85	0.86	1.5	0.96						1.5	0.52	1.92	0.81						1.45	0.73	2.11	0.65						2.52	1.07	1.89	0.86						2.06	2.14	2.93	0.86
	1.01	0.38	1.5	0.86						1.76	0.23	1.35	0.91						2.31	1.22	3.96	0.78						1.07	1.05	1.37	1.4						1.04	1.42	1.92	1.25						2.59	1.14	2.13	0.57
	1.38	1.44	1.61	1.12						1.8	0.34	1.2	1.24						1.74	0.79	1.61	1.42						2.42	1.16	1.51	0.93						2.6	0.97	1.52	0.66						2.16	0.84	2.23	0.91
	1.39	1.51	1.88	0.96						1.62	0.64	4.39	0.78						2.33	1.25	1.79	0.74						1.45	0.95	1.45	0.97						2.41	1.16	1.99	0.99						2.13	0.77	1.76	1.5
	1.34	0.94	1.91	0.78						1.33	1.23	3.52	1.82						1.78	0.55	1.67	0.71						2.24	1.31	1.78	1.06						1.26	0.34	2.43	1.03						2.04	0.78	1.96	0.62
	1.65	1.07	1.26	0.73						1.57	0.14	1.45	0.81						0.9	0.92	1.86	1.24						2.14	1.88	1.97	1.89						1.22	0.49	2.78	1.45						1.99	0.85	3.18	0.8
	1.52	1.04	1.42	0.77						1.59	0.91	2.98	1.24						1.87	1.16	2.16	0.6						0.84	1.29	0.99	1.35						2.26	1.91	1.69	1.47						2.44	0.81	2.22	0.87
	1.48	1.95	1.33	0.51						1.83	0.58	1.37	0.74						1.99	0.92	1.21	0.98						1.97	0.73	1.29	0.74						2.68	0.93	1.4	0.99						2.24	1.51	2.42	0.66
	1.51	0.92	4.43	1.1						1.55	0.7	2.07	0.6						1.71	1.09	1.19	0.73						2.87	1.66	0.98	0.58						2.75	0.72	1.17	1.16						2.02	0.24	1.91	0.63
	2.35	1.33	1.53	1.04						1.01	1.46	1.38	1.06						1.37	1	1.89	0.72						2.07	0.79	2.04	0.9						1.86	1.25	1.93	0.97						2.05	0.61	1.7	0.85
	1.51	0.87	1.81	0.83						2.26	0.74	2.2	0.66						1.38	1.26	1.76	1.21						1.86	1.23	1.23	0.68						2.07	0.52	1.79	0.53						2.01	1.02	1.48	0.67
	1.13	0.94	1.33	1.66						1.36	0.81	1.99	1.52						1.82	0.36	1.76	1.13						1.73	0.25	0.99	0.58						1.96	1.26	2.42	1.64						2.03	1.66	1.88	1.14
	1.05	1.16	1.82	1.08						2.28	1.26	1.74	0.69						1.38	1.3	2.37	0.97						2.31	1.12	2.21	1.17						2.54	0.93	2.25	0.7						1.86	1.41	2.67	0.74
	1.23	1.82	1.15	1.02						1.61	0.52	1.36	0.99						2.1	1.19	1.13	0.33						1.5	1.73	2.24	1.03						1.86	1.53	2.61	1.33						2.98	0.61	1.73	0.64
	0.83	0.65	1.64	1.08						1.56	0.87	1.54	1.19						1.13	1.05	1.95	0.9						1.75	0.28	2.43	1.27						1.9	1.23	2.93	0.89						2.37	1.61	2.28	1.14
	2.02	0.87	1.63	0.88						1.84	1.14	1.44	0.9						1.91	0.25	1.66	1.34						1.52	0.23	1.63	0.78						2.28	1.4	1.66	1.26						2.48	1.78	2.13	0.59
	1.34	1.18	1.61	0.82						1.69	0.75	1.49	1.07						1.47	0.93	1.98	0.86						2.56	1.93	1.7	1.23						1.97	1.06	2.14	0.98						2.02	1.76	2.1	0.92
	1.13	1.48	1.76	0.57						1.95	1.3	1.13	0.64						1.42	2.15	1.51	0.97						2.26	1.7	1.83	1.54						1.37	0.56	2.11	0.88						3.4	0.35	1.56	1.29
	2.09	0.72	1.69	0.72						1.32	1.21	1.9	1.19						1.45	0.5	1.57	0.89						1.72	1.47	1.89	0.81						2.16	1.34	2.78	1.12						2.71	0.95	2.27	0.92
	1.88	0.31	0.95	0.94						2.36	1.67	1.6	1.43						1.22	1.46	1.97	1.09						1.87	1.81	1.61	1.31						1.31	0.31	2.08	0.7						1.62	0.77	2.7	1.09
	2.14	0.31	1.84	1.06						1.34	0.65	1.64	0.76						1.59	0.77	1.93	1.05						1.95	0.57	1.91	0.61						1.41	0.1	1.71	1.09						1.98	0.86	2.37	0.61
	1.7	1.11	1.69	1.02						1.26	1.02	2.38	1.05						1.79	1.08	1.47	0.52						2.04	0.33	2.29	0.88						3.7	0.38	2.11	0.78						3.01	0.31	2.33	0.9
	1.92	1.27	1.8	0.97						1.85	1.52	1.36	0.41						1.75	0.51	1.69	0.79						2.46	1	1.71	0.92						1.44	0.38	1.37	1.07						1.33	0.46	1.37	0.78
	1.86	0.77	1.48	1.39						1.69	2.42	1.99	1.7						2.61	0.99	1.26	1.27						1.83	0.4	2.14	1.27						2.28	1.32	2.24	1.16						1.56	0.14	2.98	0.98
	2.15	0.28	1.2	1.23						1.43	0.72	1.83	0.62						1.44	0.64	1.36	0.79						1.61	0.26	1.58	0.86						2.36	1.05	1.3	0.49						1.59	0.4	1.38	1.19
	1.5	2.05	1.45	1.8						1.89	0.44	2.14	1.35						2.49	1.22	2.11	1.05						1.51	0.89	1.71	1.44						1.98	1	1.38	0.44						2.6	1.29	1.43	0.96
	1.88	0.19	1.48	1.26						1.72	0.42	1.24	0.9						1.21	1.93	1.59	0.75						2.73	0.97	2.66	1.28						1.6	0.39	1.23	1.28						1.56	1.45	2.67	1.4
	1.49	0.81	1.36	0.66						1.27	0.7	1.78	0.74						1.95	1.56	1.44	1.04						1.66	0.64	1.95	0.87						2.79	0.23	1.6	0.8						1.47	0.88	2.49	0.8
	1.74	1.13	1.6	0.09						2.06	1.03	1.88	1.57						1.35	0.91	1.44	1						2.04	1.03	1.4	0.84						1.84	1.02	1.42	1.1						1.87	0.77	2.71	1.04
	1.74	1.02	1.83	1.85						1.77	0.31	1.21	0.89						1.46	10.54	1.61	1.58						1.64	1.11	2.46	1.21						1.43	1.36	1.71	1.13						2.41	0.9	2.09	1.07
	1.98	1.04	2.82	0.84						1.97	1.8	1.25	1.17						1.28	1.4	1.89	1.2						2.43	2.11	1.67	0.97						2.58	0.63	1.63	1.01						2.59	1.5	2.89	1
	1.95	0.8	1.78	1.71						1.63	0.25	2.05	1						1.54	1.02	2.15	1.04						2.17	1.8	1.75	0.66						2.26	1.27	1.39	1.21						3.07	0.7	1.6	0.62
	1.46	2.02	1.59	1.38						1.12	1.01	1.74	1.02						2.14	1.01	1.82	0.63						1.39	1.5	2.23	0.85						1.4	0.97	2.27	0.95						1.93	1.55	2.09	1
	1.56	0.68	1.57	0.94						1.36	1.75	1.99	1.19						3	0.21	1.16	1.03						1.43	1.08	1.94	1.13						2.25	0.89	0.99	1.43						2.47	1.5	3.01	1
	1.75	0.72	1.8	0.89						1.28	2.36	1.74	1.15						1.01	1.05	1.64	1.87						2.02	1.88	2.06	0.93						2.3	1.3	2.3	1.1						2.51	0.9	2.35	0.91
	1.92	1.02	1.96	1.21						2.14	1.39	1.5	0.96						1.79	1.12	1.51	0.65						1.56	0.73	1.65	1.26						2.17	1.34	1.79	1.71						1.53	1.56	1.89	0.93
	1.16	1.3	1.12	1.14						2.12	1.26	1.21	0.65						1.16	1.02	1.75	0.72						1.76	2.2	1.51	1.3						2.57	0.96	1.6	1.54						1.82	0.21	1.77	0.28
	2.27	0.71	2.16	0.81						1.35	1.13	1.2	1.16						1.32	1.41	2.4	0.91						1.6	1.67	1.42	1.39						1.87	1.47	1.85	0.62						1.7	1.1	1.52	0.9
	2.32	0.55	1.72	0.75						2.18	1.34	1.61	0.97						2.1	1.19	1.86	0.68						1.01	1.58	2.18	1.15						1.68	0.4	1.91	1.34						1.95	0.9	2.07	1.36
	1.67	0.78	1.94	1.03						0.99	0.33	2.03	1.29						1.37	0.88	1.21	0.83						1.49	0.47	1.57	1.42						2.05	1.01	1.92	0.73						2.49	1.05	2.59	1.16
	1.74	0.49	1.3	0.62						1.59	0.46	1.17	0.89						2.05	1.51	1.91	0.97						1.55	0.48	1.37	1						4.43	1.15	1.41	1.01						2.34	1.17	1.94	0.7
	1.5	1.32	1.13	0.9						1.98	1.71	4.24	0.77						1.72	0.9	1.68	0.8						1.61	0.81	2.73	1.26						1.63	0.2	1.76	1.47						1.98	1.7	2.45	1.44
	1.51	0.56	2.59	1.61						1.16	0.85	2.01	1.17						1.51	0.39	1.99	0.84						1.24	1.25	1.54	1.15						1.96	0.98	1.91	1.53						2.32	1.21	1.47	1.22
	1.73	1.26	1.84	1.32						1.44	1.43	1.37	1.14						2.81	0.76	1.41	1.03						1.71	2.01	2.34	1.03						2.53	0.54	2.63	0.96						1.58	0.22	2.03	0.79
	1.72	1.16	1.78	0.99						1.56	0.46	1.49	1						1.44	1.25	1.69	1.38						1.48	0.95	1.61	0.99						1.21	1.13	1.46	0.67						2.21	0.84	2.89	1.03
	1.71	0.36	1.99	1.53						1.19	1.3	1.86	1.24						1.28	1.3	1.53	0.95						1.79	1.61	2.16	1						2.13	1.24	2.33	0.92						1.27	0.23	1.11	1.21
	1.87	1.24	1.74	0.95						1.2	0.64	2.38	0.92						1.96	1.72	2.06	0.98						1.19	1.33	1.7	1.24						1.39	0.35	1.77	0.7						1.52	0.3	1.83	0.56
	1.86	0.43	1.85	1.24						1.68	0.79	4.47	1.63						1.62	1.24	2.32	0.49						2.2	1.66	2.07	0.56						1.68	1.57	3.2	1.41						1.81	1.11	2.05	0.59
	1.96	0.65	1.64	1.13						1.64	1.32	2.1	1.58						2.53	1.07	1.64	1.49						1.51	0.36	1.94	1.11						1.48	0.16	1.6	1.55						2.28	0.99	3.54	1.06
	1.98	0.28	1.62	0.79						1.51	1.61	2	0.79						1.75	0.42	0.68	0.76						1.51	0.67	1.39	0.74						2.11	0.96	2.2	0.99						2.04	0.45	1.45	0.46
	1.29	1.65	1.17	0.8						1.51	0.79	2.6	1.13						1.41	0.91	3.82	0.98						1.7	1.37	2.18	0.78						1.65	0.19	1.96	1.51						2.18	2.22	3	1.08
	1.87	0.55	2.21	1.03						1.91	1.21	1.84	0.87						1.29	2	4.56	1.27						1.03	1.23	2.02	0.87						1.16	0.8	2.75	0.87						2.65	0.24	1.15	0.53
	1.38	1.14	1.1	1.03						1.64	1.07	1.64	1.65						1.19	2.42	2.01	1.03						1.52	1.25	2.35	1.02						2.46	0.95	1.54	0.71						1.36	0.61	2.45	0.87
	1.69	0.34	3.01	1.61						1.41	2.3	1.19	1.47						1.75	0.15	1.85	0.74						1.25	0.66	2.39	0.86						2.12	1.52	1.29	1.39						1.53	1.91	1.28	1.87
	1.28	1.02	2.12	1.13						1.73	2.43	3.3	1.17						1.73	0.53	2.12	0.8						1.82	1.64	1.89	0.78						1.9	1.28	1.79	1.12						1.66	1.46	3	1.03
	1.74	0.47	1.54	0.84						1.26	1.34	3.8	1.34						1.86	1.1	1.2	0.66						1.73	1.08	1.96	1.35						1.4	0.3	1.78	1.07						1.53	1.44	1.97	0.8
	2.43	1.59	1.27	0.86						1.8	0.47	1.76	1.21						2.26	0.68	2.08	0.92						1.51	0.57	2.29	0.82						1.8	1.66	1.75	0.53						2.31	1.92	2.46	0.98
	1.56	2.05	1.64	0.98						1.68	1.49	2.17	1.03						1.86	1.34	1.14	1.84						1.49	1.96	1.73	1.36						2.3	0.98	1.99	0.36						2.54	1.42	2.19	1.08
	3.34	1.51	1.53	1.02						1.27	1.43	1.35	1.01						1.92	0.5	1.51	1.89						2.12	1.3	2.06	0.95						2.39	1.42	1.64	0.84						1.77	1.1	1.68	1.09
	2.12	0.42	1.88	0.93						2.04	0.24	1.45	0.99						2.17	0.74	1.73	0.57						1.83	1.47	1.72	0.64						1.96	0.74	2.05	0.45						1.92	1.46	1.96	1.11
	1.83	1.64	2.45	0.83						1.49	0.53	1.61	1.19						1.32	1.93	4.34	0.88						2.17	0.84	2.42	0.89						1.43	0.65	1.94	0.98						1.71	0.5	2.53	1.34
	1.38	1.74	1.63	1.18						0.95	1	1.69	0.9						1.85	0.45	1.5	0.82						2.04	1.5	1.51	0.8						1.32	0.33	2.45	1.47						2	1.51	2.7	1.04
	2.1	0.41	1.71	1.35						1.64	0.7	1.45	1.04						1.59	1.72	1.71	0.93						2.25	0.11	1.59	0.88						2.34	1.39	1.56	1.02						1.89	0.6	1.8	0.62
	1.64	0.81	1.95	0.69						3.34	1.4	1.84	0.97						1.85	0.26	3.32	0.99						2.44	0.97	1.7	1.38						2.12	1.24	2.16	1.11						1.22	0.85	2.63	0.76
	1.65	0.54	4.36	1.19						1.18	1.09	1.79	1.16						2.16	0.96	1.94	1.01						1.52	0.29	1.8	0.88						1.94	1.25	1.5	1.72						2.85	0.71	3	0.66
	1.94	1.02	2.02	1.29						1.74	1.12	1.19	1.29						2	0.41	4.16	1.06						2.09	1.44	1.71	1.2						1.46	0.58	1.59	0.68						1.55	0.59	1.76	0.82
	2.47	0.3	2.13	1.01						1.28	0.89	1.12	0.67						1.59	1.26	2.02	0.7						2.07	1.22	1.36	0.69						1.89	1.31	2.47	1.71						2.25	1.66	2.34	0.85
	1.65	1.81	1.26	1.03						2.51	1.36	1.12	0.77						2.29	1.28	1.31	1.38						1.27	0.41	1.37	0.87						1.98	1.01	1.76	1.32						2.01	1.9	2.28	0.59
	1.72	1.34	1.92	0.68						1.29	0.72	1.89	1.74						1.04	0.73	1.66	1						1.57	1.72	1.45	1.23						1.77	0.9	2.09	1.04						2.75	1.12	2.05	0.29
	1.1	0.36	1.23	0.89						1.76	0.98	2.11	0.77						1.43	0.16	1.26	1.48						1.19	1.28	1.27	1.24						2.01	1.94	2.39	1.28						2.63	0.83	1.29	1.35
	1.75	0.22	1.13	0.35						1.52	0.9	1.46	0.96						2.11	0.94	1.01	0.44						1.55	0.81	2.19	0.89						2.09	1.98	2.24	0.99						1.5	0.4	1.86	1.15
	1.77	0.4	1.46	0.81						1.18	1.55	2.32	0.83						2.09	0.56	1.71	0.54						1.54	0.36	2.16	0.66						1.39	0.26	1.65	0.66						2.52	0.73	2.17	1.27
	1.47	1.2	2.58	0.73						1.03	1.45	1.48	0.78						1.96	0.35	2.34	0.74						1.2	1.08	2.28	0.64						1.74	0.29	1.64	1.14						2.01	0.83	2.84	0.8
	1.01	1.57	1.09	1.45						1.35	1.21	1.25	1.53						1.96	0.45	1.37	1.14						1.52	0.84	2.38	0.84						2.06	0.99	2.07	1.12						1.73	0.36	2.1	1.04
	1.78	1.17	1.91	0.71						1.42	1.79	1.58	0.94						1.66	0.99	2.04	1.2						1.68	1.39	1.68	1.11						1.15	0.22	1.81	0.72						1.88	0.8	2.04	0.92
	2.18	1.42	1.25	1.02						1.66	0.95	1.62	1.05						2.69	1.38	1.14	1.55						1.76	0.65	2.36	0.7						2.31	1.65	2.37	1.54						2.38	1.32	2.02	0.82
	1.4	1.14	1.62	1						1.27	2	2.24	1.67						1.11	2.17	1.03	0.64						1.48	1.35	2.3	0.88						1.64	0.5	1.63	1						2.01	1.22	1.72	0.71
	1.13	1.24	1.75	0.87						1.93	0.22	1.86	0.99						1.96	1.73	2.12	0.69						1.47	0.64	1.92	0.79						1.95	0.85	1.5	0.79						2.53	1.02	2.33	1.66
	1.57	1.02	1.26	0.96						1.65	1.14	4.24	1.86						1.77	1.19	1.89	1.27						1.88	1.35	2.01	1.37						1.53	1.83	2.8	0.71						2.36	1.74	1.93	0.96
	2.1	1.13	1.48	1.01						1.55	0.28	2.77	1.64						2.05	1.25	1.48	1.23						2.38	1.4	1.94	0.89						1.78	1.5	1.97	0.97						1.8	1.21	2.9	1.03
	1.57	1.63	1.84	1.03						2.04	0.83	1.48	1.09						1.06	1.06	2.3	0.9						1.68	1.15	2.06	0.82						1.85	1	1.63	1.39						1.7	0.3	3.15	1.5
	2.1	0.86	1.62	1.05						1.68	0.76	1.34	0.89						1.61	0.23	2.06	0.8						1.37	1.42	1.21	0.84						1.43	0.49	1.42	1.01						1.82	0.63	1.26	1
	1.01	0.57	1.66	0.68						1.97	0.2	2.03	0.91						1.06	1.16	1.73	1.01						1.38	1.46	2.15	0.92						2.14	1.19	1.68	0.58						2.37	0.67	2.67	1.61
	1.56	0.61	1.43	1.18						1.77	0.42	1.49	1.07						1.94	0.43	1.64	1.14						1.98	0.98	1.67	1.36						1.96	1.45	1.85	1.03						1.24	0.25	2.34	1.07
	1.5	1.12	2.32	0.84						1.18	0.93	1.51	1.01						2.12	1.45	1.98	1.19						2.1	1.14	1.25	0.8						2.54	1.21	1.62	1.72						1.69	0.47	1.81	1.34
	1.99	1.23	1.49	0.45						0.95	2.09	1.32	0.91						2.44	1.07	1.74	1.08						1.3	1.94	2.17	1.43						1.4	0.59	1.91	0.73						2.62	0.06	1.98	0.67
	2.73	0.97	1.81	0.54						1.4	0.75	1.56	1.17						1.52	0.7	1.66	0.9						1.94	1.37	1.28	0.64						1.95	1.34	1.65	1.21						1.28	1.44	1.77	1.4
	1.6	1.28	1.52	1.04						2.07	0.16	2.2	1.08						1.19	1.35	1.31	0.93						2.69	1.08	2.08	0.93						1.69	1.49	1.24	1.58						2.12	0.75	1.83	1.18
	2.09	1.14	2.38	0.87						1.73	0.2	1.29	0.91						1.82	0.29	1.32	0.82						1.95	0.42	2.46	0.7						2.26	1.22	1.96	0.97						1.51	1.26	1.53	0.78
	1.2	1.27	2.08	1.67						2.2	1.17	1.21	0.75						1.91	1.02	2.51	0.95						1.92	0.26	1.55	1.37						2.34	1.2	2.85	0.76						1.26	0.64	1.97	1.06
	1.95	1.59	1.54	0.8						1.4	1.3	2.05	1.01						2.22	1.24	1.58	0.86						1.27	1.16	1.8	1.12						1.97	1.03	2.39	1.13						1.76	0.79	1.49	1.57
	1.98	0.29	1.93	0.88						1.85	0.71	2.09	0.76						1.34	1.74	1.44	0.74						1.82	0.8	2.1	0.63						1.11	0.63	2.44	1.51						2.07	1.41	1.65	1.22
	1.43	0.97	1.66	1.06						1.18	0.87	1.58	1.35						2.31	1.8	2.42	0.8						1.74	0.35	2.06	0.84						1.18	0.6	2.12	1.33						1.93	1.6	3.29	0.64
	1.98	1.16	2.83	0.31						1.09	0.19	1.63	0.86						1.42	0.83	1.96	1.31						1.56	0.39	2.11	1.03						1.66	1.58	2.2	0.68						2.79	0.43	1.53	2.39
	1.61	1.83	1.58	1.2						1.62	0.2	1.8	1.32						1.83	1.22	1.98	1.2						1.58	0.26	1.52	1.19						1.44	0.41	1.99	0.91						2.5	0.77	1.61	1.01
	1.09	1.06	1.6	1.13						2.3	0.67	1.74	0.85						1.99	0.89	1.5	0.9						1.35	0.53	2.45	1.12						1.88	1.42	2.17	1.08						1.97	2.98	1.54	0.79
	1.29	1.11	1.77	0.79						2.29	1.33	1.57	1.3						1.46	0.98	1.46	1.38						1.56	0.4	1.67	1.52						2.23	1.27	1.68	1.4						1.73	1.8	2.21	0.62
	2.4	1.61	1.91	1.43						1.27	0.95	1.87	1.09						2.12	1.38	0.98	0.71						1.45	1.88	2.33	0.83						2.24	1.33	1.45	0.78						2.21	1.18	3.1	1.03
	1.79	0.85	1.53	0.73						1.56	0.74	2.19	0.66						1.37	1.78	1.24	0.94						1.51	0.16	1.78	1.08						2.38	1.05	1.49	0.81						1.35	0.41	2.52	1.35
	5.96	0.5	1.29	0.78						1.48	0.66	2.14	0.81						1.21	0.65	1.66	1.33						2.19	1.08	2.41	0.7						1.99	1.05	2.62	0.78						2	2.14	1.82	0.84
	1.26	0.61	1.88	0.05						1.7	0.76	1.27	1.09						1.15	1.3	1.87	0.83						1.7	0.2	2.73	0.99						1.66	1.23	1.58	0.59						1.55	0.33	3.91	1.72
	2.65	1.42	1.3	1.31						1.25	0.66	1.67	0.93						2.41	1.35	1.47	1.14						1.78	1.2	1.9	0.7						1.21	0.45	1.4	1.35						1.69	1.42	1.84	0.98
	1.5	0.79	2.05	0.52						2.03	0.4	1.95	0.59						1.68	0.67	1.87	0.95						0.92	2.26	1.11	0.12						2.13	1.4	1.69	1.11						2.62	0.89	2.59	0.58
	1.98	0.47	2.29	1						1.59	1.58	1.66	1.26						1.63	1.42	1.43	1.29						2.03	1.33	1.28	0.77						1.49	0.66	2.59	1.54						2.74	0.31	2.67	1.24
	4.98	0.41	1.78	0.42						1.37	0.87	1.68	1.12						2.23	1.16	1.89	0.68						2.23	1.92	1.92	0.74						1.49	0.67	1.78	0.82						1.25	0.4	2.28	1.15
	3.68	1.25	1.85	0.44						1.91	0.25	2.02	1.05						1.28	0.88	2	0.78						1.96	1.73	1.35	1.06						1.76	1.03	1.71	0.78						1.55	0.51	2.47	0.65
	1.44	1.2	1.58	1.23						2.05	0.39	1.74	0.77						1.67	1.83	1.37	0.91						1.93	0.61	1.49	1.33						1.5	0.13	2.47	0.61						1.73	1.8	1.75	1.21
	1.26	1.35	1.98	0.56						2.58	1.19	1.36	1.17						1.16	0.72	1.93	0.72						1.77	0.37	2.49	1.28						2.53	0.85	2.29	0.96						2.48	0.49	1.73	1.16
	1.81	0.39	2.49	0.73						1.71	0.24	1.36	0.82						1.17	1.07	1.63	1.32						1.97	1.59	1.37	1.29						1.73	1.39	1.88	1.32						2.02	1.13	2.49	1.23
	1.88	0.79	1	1.33						1.75	0.3	2.06	0.83						2.42	1.21	3.4	1.53						1.71	0.22	1.78	0.98						2.57	0.48	2.04	0.97						1.93	1.26	1.32	1.46
	2.06	1.08	1.43	0.62						1.69	0.33	1.48	1.27						1.76	1.37	1.75	1.4						1.95	0.52	1.56	1.47						1.31	0.78	2.18	0.95						1.65	1.49	2.28	0.89
	1.08	1	1.24	0.81						1.44	1.19	1.78	1.37						1.83	0.18	1.42	0.8						1.95	0.3	1.17	1.13						1.79	1.08	2.44	0.86						1.87	0.6	3.12	0.68
	1.88	0.74	1.76	1.3						2.83	1.88	1.83	1.04						1.59	1.21	1.52	1.19						2	1.18	2.02	1.02						1.17	1.39	1.19	1.08						1.5	1.1	1.88	1.25
	1.08	1.49	1.3	0.76						1.87	1.62	0.96	0.57						2.28	1.62	10	1.76						2.23	1.39	1.58	0.45						1.14	0.73	1.93	0.5						2.57	0.99	1.09	0.05
	2	1.62	1.08	0.87						1.44	0.9	3.8	1.1						2.24	0.97	1.99	0.63						1.38	0.22	1.74	0.84						1.3	0.78	2.18	1.17						1.79	1.17	1.5	1.23
	1.98	0.76	1.1	0.99						1.19	1.23	1.18	0.65						1.9	0.34	1.6	1.41						1.4	0.89	1.17	0.73						1.8	0.71	1.83	0.81						3.46	0.62	2.05	0.46
	2.46	1.19	1.43	1.2						1.89	0.58	1.53	1.42						4.08	1.53	1.17	1.32						2.48	0.81	1.25	0.96						1.29	0.35	1.83	0.6						1.34	0.37	1.32	0.56
	1.49	1.3	2.13	1.26						2.28	0.71	1.54	1.28						2.39	0.95	1.96	0.73						1.25	1.14	1.88	0.65						1.75	0.6	1.61	1.77						1.73	1.05	2.55	0.59
	1.59	0.83	1.45	1.38						1.7	0.88	1.98	0.72						1.61	0.31	1.54	0.82						2.68	1.31	1.97	1.41						2.51	0.91	2.18	1.23						1.63	0.96	3.28	0.86
	1.93	1.05	4.16	2.31						1.39	0.88	1.87	1.55						1.33	1.49	1.91	0.8						1.57	0.22	2.37	1.01						1.61	0.19	1.84	0.7						1.22	0.83	2.61	1.24
	2.33	1.72	1.18	0.76						1.74	0.66	1.93	0.98						1.02	0.54	1.44	0.99						2.78	1.04	1.4	0.77						1.26	1.15	1.54	1.27						2	1.57	1.97	0.91
	2.1	0.24	0.98	0.64						1.3	1.33	1.89	1.17						2.3	1.07	1.43	1.17						1.15	1.18	1.42	0.69						1.56	0.49	1.33	0.55						1.77	1.55	2.33	0.92
	1.35	0.71	1.3	1.21						1.06	1.29	1.38	1.61						1.54	1.09	1.29	1.2						1.15	0.53	2.12	0.7						2.18	1.14	1.42	0.61						1.59	1.09	1.62	0.66
	1.32	0.32	1.23	1						1.45	0.49	2.03	1.51						1.68	0.36	1.59	0.84						2.28	1.12	1.43	0.82						2.59	0.99	2.59	1.03						1.43	1.62	3.04	0.68
	2.07	1.45	1.44	1.46						1.63	0.5	4.29	0.63						1.56	0.19	1.93	0.6						1.44	1.27	2.55	0.92						1.21	0.93	1.78	1.28						2.31	0.3	1.86	1.18
	1.33	1.49	1.39	0.41						1.18	1.6	1.59	1.26						2.03	1.35	1.53	0.7						1.98	1.22	1.2	0.62						1.68	0.74	2.72	0.61						2.05	0.13	2.42	0.74
	1.24	1.57	1.82	1.02						1.4	1.39	1.62	1.27						0.88	1.48	1.44	1.46						1.83	0.08	1.52	0.8						1.89	1.82	1.12	0.52						2.07	1.41	1.47	1.43
	2.41	1.42	1.59	0.79						2.44	1.14	1.81	1.02						1.55	0.34	1.8	0.95						1.25	2	2.17	1.3						1.83	0.41	1.62	1.02						1.28	1.08	1.73	0.8
	1.48	0.89	1.17	1.1						3.67	0.29	1.31	0.59						1.85	0.53	1.22	1.03						2.18	1.53	1.75	0.85						2.39	0.8	1.88	0.71						1.15	0.39	2.07	0.74
	1.18	1.35	1.22	0.69						2.2	1.06	2.44	0.93						1.12	1.79	1.47	0.77						1.55	0.24	2.46	0.8						1.9	2.09	1.73	1.31						1.98	0.49	2.04	0.81
	1.3	1.79	2.4	0.66						2.18	0.73	2.02	1.08						1.31	1.41	2.05	1.01						1.81	0.98	1.57	1.1						1.87	1.6	2.1	0.87						1.98	1.2	2.68	0.84
	1.58	1.34	1.48	0.68						1.49	0.48	1.53	1.32						1.21	1.13	3.32	0.89						1.97	1.81	1.72	1.08						2.41	1.29	1.72	0.63						1.9	1	2.06	0.95
	1.32	1.52	2.04	0.58						2.22	0.24	1.6	0.72						1.09	0.65	1.66	1.79						2.54	0.9	1.26	1.12						1.87	0.23	1.18	1.27						1.07	2.03	1.8	0.79
	2.55	1.23	2.1	1.52						1.52	0.67	1.61	0.93						1.4	1.11	1.75	1.15						1.25	1.08	1.69	0.96						1.61	1.01	1.98	0.74						1.88	1.44	1.54	0.52
	1.78	1.16	1.39	0.99						1.92	1.31	1.29	0.54						1.46	0.78	1.31	0.49						1.38	0.87	2.16	1.18						1.41	1.04	1.87	1.11						1.42	0.26	1.84	1.06
	2.45	0.87	1.79	1.09						1.96	0.77	1.45	0.75						1.27	1.01	2.09	1.14						1.51	0.83	1.72	0.85						2.14	1.48	2.07	1.17						1.51	0.97	2.1	0.26
	1.47	0.91	1.84	0.8						1.21	1.2	1.19	0.94						1.59	1.18	1.51	0.95						1.78	0.86	1.31	1.16						2.34	0.73	1.84	1.2						2.04	1.32	1.65	0.98
	1.39	1.33	2.01	1						1.15	1.04	1.91	0.84						1.21	0.76	1.42	0.57						1.86	1.33	1.61	0.98						1.87	1.05	2	0.72						2.57	0.52	2.46	0.8
	2.07	1.44	1.83	0.7						2.92	0.6	1.47	1.04						1.26	1.37	1.71	1.39						1.42	0.39	2.72	0.87						2.17	1.7	1.4	0.84						1.72	0.43	2.07	0.51
	2.04	0.37	4.19	0.94						1.45	1.41	2.16	0.7						1.87	1.48	1.58	0.97						1.72	0.81	1.79	0.74						1.47	1.19	2.2	0.87						1.57	0.25	2.06	0.61
	1.45	0.78	1.64	2.02						1.84	0.26	2.06	1.25						1.66	1.14	1.84	1.06						2.95	0.98	2.16	0.76						1.78	1	1.3	0.68						1.91	1.29	2.19	0.62
	1.88	1.33	1.28	0.48						2.38	1.3	3.12	1.11						2.15	1.17	1.23	1.24						1.26	0.67	2.78	1.17						1.81	1.64	2.42	1.17						1.52	1.57	1.49	1.5
	1.95	0.23	1.66	1.19						1.99	1.37	2.22	0.91						1.68	0.73	1.89	1.08						1.07	1.2	2.75	1.02						1.53	1.15	1.76	0.69						1.93	0.13	1.99	0.94
	2.15	1.31	1.71	1.2						0.96	0.21	1.65	0.97						2.2	1.34	1.62	0.75						1.84	0.88	2	1.19						1.52	0.18	1.69	0.33						2.12	1.52	2.19	1.21
	1.21	0.66	1.98	1.09						1.17	0.91	1.63	0.5						2.04	0.75	1.31	2.3						1.23	0.34	1.83	0.88						1.96	1.16	2.83	0.97						2.26	0.75	3.75	0.96
	0.96	0.2	2.09	0.98						1.42	1.14	1.74	1.02						1.66	1.54	2.59	0.89						1.16	1.71	2.44	0.8						2.77	0.61	1.73	0.83						2.32	0.8	1.6	0.86
	1.67	0.95	1.58	1.1						1.26	1.32	1.78	0.81						1.65	0.8	1.9	0.7						2	1.31	2.58	1.14						2.09	1.49	1.41	0.79						1.24	0.86	1.86	0.66
	1.6	0.94	1.73	0.63						1.92	1.01	1.73	0.8						1.53	1.47	1.7	1.62						2.25	0.73	2.54	0.96						1.86	1.13	1.69	0.98						1.75	0.16	2.32	1.19
	1.78	0.39	2.15	1.31						1.52	0.58	1.95	0.62						1.65	0.69	2.18	0.85						1.42	0.29	1.64	1.46						2.25	0.95	2.19	1.09						2.04	0.92	2.28	1.03
	1.46	1.7	1.39	0.88						1.98	1.19	1.14	0.69						1.84	0.42	2.52	1.5						1.07	1.4	2.21	1.06						1.6	1.28	1.09	1.48						3.44	0.47	1.28	0.69
	1.39	1.25	1.78	1.12						1.44	1.38	1.64	0.75						1.78	1	1.82	0.96						1.64	0.19	1.57	1.09						1.42	0.6	2.82	0.99						2.57	1.16	2.7	0.71
	1.43	1.3	1.75	0.8						1.89	0.23	1.75	1.36						1.59	0.2	1.69	1.06						2.08	0.82	1.74	0.86						2.5	0.9	1.39	1.37						1.98	0.47	2.5	0.64
	1.31	0.96	1.55	1.3						1.34	2.57	1.96	1.02						1.2	1.62	1.97	0.73						2.03	0.65	1.23	0.42						1.16	0.99	1.23	0.72						1.75	0.25	1.6	0.63
	2.55	1.48	1.99	0.89						1.09	1.38	2.23	1.1						1.65	1.08	1.36	0.9						1.83	1.06	1.74	0.87						1.73	1.59	1.56	1.51						1.66	0.61	1.43	1.29
	1.7	0.68	2.05	1.1						1.15	1.26	1.99	0.32						1.43	0.51	1.97	0.55						1.17	0.65	1.48	0.58						1.5	0.81	1.84	0.73						2.03	1.4	1.15	1.34
	1.87	0.64	1.7	0.88						2.03	0.8	1.4	0.99						2.05	1.33	1.73	0.68						1.19	1.26	2.08	0.42						2.11	1.5	1.95	0.73						1.28	1.04	2	1.01
	2	0.61	1.66	0.75						1.53	0.98	2.21	0.83						1.78	0.34	1.55	1						2.42	0.91	1.63	0.6						1.83	1.84	2.34	0.6						3.6	0.28	2.02	1.25
	1	0.57	1.62	1.17						1.26	1.18	1.79	1.02						1.49	1.03	1.29	1.11						2.22	1.65	1.34	0.64						1.31	0.59	1.41	1.04						1.83	1.07	2.36	0.85
	1.34	1.3	1.5	1.22						1.97	1.15	1.1	0.79						2.02	1.05	1.79	1.3						1.22	0.31	2.34	0.76						2.11	1.49	1.81	0.93						1.58	0.64	1.94	1.45
	1.54	1.34	1.64	1.13						1.41	1.79	1.3	0.87						1.31	0.9	2.07	0.92						1.65	1.73	1.67	0.66						2	2.19	2.27	0.98						1.77	1.11	2.4	1.42
	1.76	0.94	1.59	0.55						2.01	0.35	2.09	0.61						1.48	0.86	2.12	0.98						1.56	0.81	1.18	1.07						2.29	1.02	2.22	0.72						2.72	0.31	2.21	1.05
	1.39	1.31	1.56	0.74						1.62	0.99	1.27	1.21						1.51	1.23	1.41	1.18						2.21	1.4	1.91	0.5						2.37	0.95	1.43	0.71						2.18	1.86	2.16	0.71
	1.45	0.36	1.82	0.97						1.34	1.44	1.77	0.7						1.64	0.11	1.44	0.74						2.47	0.79	2.01	0.99						1.6	0.29	2.47	1.18						2.93	1.05	2.89	2.19
	1.66	0.43	1.86	0.84						1.72	1.27	2.94	0.95						2.49	1.55	2.05	0.49						1.96	1.81	1.35	0.97						2.12	0.76	1.94	1.18						1.4	0.46	1.9	0.47
	1.41	0.97	1.9	1.05						1.54	2.09	1.32	1.03						1.29	1.44	2.03	0.64						2.46	0.53	1.75	1.63						1.69	0.62	1.94	0.59						2.42	1.08	1.63	1.21
	2.29	0.61	2.06	0.91						1.26	2.39	1.68	1.09						0.91	0.45	1.8	0.71						2.38	1.06	1.68	0.61						1.54	0.18	1.59	1.22						2.22	2.2	1.96	1.04
	2.03	0.22	2.15	1.36						1.84	0.21	1.73	1.29						1.87	0.37	2.24	0.64						1.56	0.25	2.31	1.04						2.41	1.25	1.35	0.75						2.13	1.4	2.55	1.34
	2.14	0.23	1.43	1.12						1.52	1.18	1.59	1.6						1.18	0.77	2.44	0.89						1.89	1.15	1.09	1.02						1.9	0.99	1.87	1.21						2.28	3.11	3.44	1.53
	1.19	0.51	2.44	0.73						1.32	2.32	1.54	1.05						1.68	0.99	2.07	1						1.86	1.37	1.64	0.85						2.45	0.6	2.58	0.89						2.15	1.39	3.08	0.91
	1.66	0.26	1.76	0.93						2.25	1.44	1.5	1.59						1.6	1.2	4.08	0.48						1.52	0.42	1.31	1.49						3.25	0.16	2.13	0.62						1.61	0.96	1.89	1.03
	1.39	0.97	2.17	0.69						1.41	1.38	1.93	1.07						1.71	0.34	1.2	0.78						1.52	1.3	2.87	1.03						2.48	1.33	1.87	1.15						1.19	0.72	1.64	0.72
	1.33	0.81	1.86	1.21						1.71	0.34	1.72	1.25						1.57	0.29	1.99	0.76						1.18	1.67	1.72	0.82						1.84	1.17	2.3	0.96						2.03	0.65	2.73	0.67
	1.49	1.35	1.43	1.28						1.59	1.63	1.38	0.59						1.34	1.17	2.35	0.73						3.16	0.25	2.02	0.74						1.69	1.36	2.02	0.97						2.21	0.47	1.92	1.1
	1.08	1.26	3.61	0.53						1.37	1.28	2.09	0.9						2.06	0.2	1.88	0.93						2.1	0.55	1.47	0.72						2.66	0.79	2.63	1.06						3.61	0.26	2.59	1.69
	1.24	1.47	5.71	0.18						1.19	1.08	1.36	1.24						1.19	1.59	6.73	0.6						2.13	1.51	1.37	0.56						1.96	1.22	2.04	1.43						2.29	1.45	1.74	1.04
	0.89	1.79	3.9	1.18						1.83	0.59	1.59	1.36						2.19	1.44	1.82	1.31						1.77	0.82	2.39	1.44						2.74	1.26	2.23	1.01						2.26	0.91	3.22	0.94
	1.33	1.34	6.56	1.37						1.42	0.91	2.07	1.51						1.71	1.55	1.86	0.81						1.64	0.34	1.44	0.69						2.41	1.13	1.54	0.73						1.89	1.2	3.52	1.04
	1.41	0.83	2.19	0.97						1.11	1.6	1.1	0.73						1.97	1.01	1.37	0.51						2.16	1.22	1.84	0.67						1.19	0.68	1.58	0.95						1.49	0.51	4.65	1.12
	1.28	1.12	1.86	0.58						1.45	1.2	1.31	0.93						2.43	1.19	1.58	0.6						1.55	1.51	1.4	0.97						2.05	1.53	1.88	0.55						1.21	0.24	2.08	0.89
	1.43	0.39	1.66	1.25						1.44	1.32	1.32	1.32						1.64	0.29	1.8	0.81						1.88	1.12	2.2	1.01						2.41	0.84	1.35	0.98						1.96	1.16	1.65	1.07
	1.63	0.69	1.49	0.63						1.33	1.21	2	1.08						2.58	1.37	1.32	1.75						1.94	1.29	1.69	1.11						1.91	2.15	2.13	1.31						2.29	0.93	2.59	1.38
	1.68	1.25	1.52	0.71						1.91	0.45	1.84	0.93						1.62	1.75	1.55	0.94						1.81	0.63	1.18	1.1						1.75	1.2	1.66	1.03						1.48	0.41	1.67	0.91
	1.42	1.29	1.67	1.35						1.37	1.27	1.85	1.19						2.09	0.57	1.62	0.64						1.51	1.06	2.07	0.71						2.29	1.96	1.66	0.98						2.77	1.38	1.88	0.64
	1.49	0.98	1.54	1.28						1.75	0.38	1.48	0.82						1.96	1.15	2.01	1.02						2.11	1.68	1.71	0.94						1.46	0.41	1.17	1.42						1.16	0.76	1.66	0.75
	1.58	1.8	1.85	0.44						1.72	0.35	2.41	0.69						1.77	0.4	1.06	0.76						1.45	0.15	1.75	0.86						2.2	1.79	1.61	1.32						2.54	1.01	2.12	0.87
	2.03	0.24	1.51	0.72						1.73	0.83	1.59	0.79						1.58	2.02	1.41	1.33						2.26	0.92	2.18	0.68						1.67	0.95	2.09	0.58						3.01	1.11	1.04	0.54
	3.39	0.3	1.81	0.92						1.19	1.49	1.93	1.4						1.21	0.78	1.61	1.51						2.34	1.55	1.94	0.97						2.06	0.8	1.78	0.93						2.09	2.67	1.39	0.76
	1.59	1.07	1.91	0.92						1.38	2.19	1.7	1.16						1.73	0.14	1.26	0.98						2.29	1.14	2.01	1.22						2.19	1.19	1.25	0.96						1.25	0.34	2.59	0.74
	2.21	1.67	1.42	1.27						1.31	0.59	1.61	1.08						2.46	1.37	1.76	1.23						2.21	1.34	1.52	0.91						2.21	1.67	1.66	1.53						2.01	1.11	2.09	1.28
	2.05	1.23	1.98	1.13						1.21	1.4	2	1.37						1.46	0.23	1.46	0.85						1.4	0.6	1.16	1.19						2.01	1.78	2.11	1.3						1.41	0.5	2.66	0.83
	3.05	1.16	1.79	0.79						1.58	0.97	2.05	0.83						2.14	0.69	3.7	1						2.78	0.32	1.74	1.28						2.1	1.58	2.29	1.36						2.07	0.34	2.93	1.26
	1.06	0.82	1.21	0.4						1.31	1.02	1.54	0.69						1.91	1.4	2.05	0.86						1.11	1.1	1.68	0.5						2.49	0.68	2.24	0.83						2.26	0.54	2.76	0.54
	1.66	0.39	1.18	1.11						1.46	1.25	2.06	0.64						1.84	0.96	2.04	1						2	1.37	2.09	1						2.36	1.55	1.12	1.2						2.03	0.71	2.65	0.83
	1.13	1.25	1.39	0.83						0.91	0.44	1.27	1.03						2.62	1.48	1.55	0.93						1.76	0.49	1.82	1.54						1.41	0.21	1.94	1.01						1.75	0.69	2.89	0.6
	1.61	1.31	2.16	1.04						1.38	1.02	1.32	1.43						2.08	1.23	3.14	0.91						1.61	0.84	1.65	0.86						2.23	1.68	1.51	1.01						1.6	0.64	1.45	0.74
	2.18	0.69	1.83	1.65						1.34	1.07	2.04	0.96						1.82	0.35	1.75	1.57						1.67	0.45	1.33	0.85						1.97	1.44	3.02	1.14						1.25	0.43	2.42	0.97
	2.64	0.97	1.35	0.87						0.96	1.19	1.65	1.16						1.46	1.58	5.9	0.92						1.89	1.09	1.43	0.93						1.47	1.16	2.55	1.21						2.55	0.71	2.04	0.87
	1.88	0.47	1.77	1.39						1.73	0.2	2.35	0.95						1.42	1.04	1.44	0.84						1.4	0.32	1.86	0.86						1.6	0.39	1.63	0.11						2.13	1.36	1.87	0.65
	1.84	0.51	1.56	1.56						1.14	1.77	2.18	0.77						1.46	0.81	1.29	1.67						1.73	0.79	1.5	0.93						1.85	1.32	1.34	0.92						2.19	1.77	2.5	1.64
	1.14	1.21	1.25	0.59						1.71	0.21	1.47	2.3						1.95	0.45	1.39	0.65						0.95	1.38	1.57	0.66						3.12	1.23	1.53	0.77						1.81	1.08	2.12	1.44
	1.43	1.92	1.98	0.74						1.35	0.65	1.6	1.29						2.05	1.2	2.05	0.89						1.78	1.07	2.74	1.21						1.96	1.15	1.47	0.98						2.16	1.16	2.8	0.78
	1.12	1.13	2.41	1.33						1.55	0.41	1.48	1.13						1.98	0.71	1.67	0.8						3.59	0.28	1.9	1.33						2.22	0.7	1.67	0.84						1.07	0.32	1.93	1.23
	1.74	1.06	1.88	1.55						0.82	1.4	1.67	1.42						1.08	1.5	1.36	0.79						1.93	2.12	1.9	1.15						2.49	0.31	2.5	1.15						1.49	0.33	1.18	0.78
	1.15	0.96	1.64	1.21						2.04	1.66	1.26	0.97						1.72	0.58	1.4	0.61						1.61	0.52	2.45	1.01						1.34	0.21	1.38	0.67						3.87	0.9	2.52	1.19
	1.99	0.48	1.71	1						1.45	1.56	1.68	1.09						1.52	1.13	1.57	0.7						3.49	0.29	1.82	1.24						1.81	1.38	1.48	0.94						1.75	1.32	3.15	1.08
	1.85	0.54	2.7	1.17						1.94	0.99	1.68	0.88						2.07	0.26	1.9	1.01						1.89	0.89	1.81	1.02						1.19	1.46	2.22	0.85						1.21	0.57	2.3	0.85
	1.24	0.29	1.68	1.08						1.24	1.15	1.51	1.64						2.02	0.16	1.46	1.16						1.42	0.24	1.72	0.93						2.78	0.36	1.8	1.09						1.52	0.52	3.3	0.93
	2.37	1.27	1.84	0.91						1.94	0.28	1.25	1.19						1.51	1.6	1.33	1.1						1.54	0.81	2.44	0.66						1.52	0.76	1.94	0.89						2.07	0.78	2.2	0.94
	1.39	0.77	2.17	1.23						1.19	1.25	1.63	0.96						2.41	1.44	1.96	0.59						1.97	1.27	2.22	0.73						1.51	1.03	1.58	0.72						1.79	0.26	1.44	0.91
	0.95	0.62	1.4	1.36						1.71	0.8	1.27	0.44						2.36	1.25	1.65	1.11						1.2	0.23	1.52	1.24						1.8	1.1	2.06	0.69						1.4	0.25	2.68	1.98
	1.46	1.03	1.89	0.95						2.09	1.21	2.32	0.95						1.47	0.64	1.55	1.36						2.64	0.53	2.21	0.81						1.32	0.27	1.72	0.97						1.86	1.24	1.74	1.05
	1.57	0.28	2.03	0.76						1.85	0.16	1.61	0.85						1.96	1.24	2.58	0.87						2.58	1.1	1.71	0.95						2.29	1.21	2.55	0.97						2.06	1.39	2.04	0.67
	1.17	0.29	1.66	0.84						1.74	1.7	1.87	0.97						1.87	0.13	1.46	1.22						1.29	1.29	2.21	0.74						1.49	0.53	1.48	2.05						2.66	0.78	2.14	0.7
	1.39	1.31	1.48	1.13						1.45	1.08	1.05	1.01						1.27	1.18	1.72	0.8						1.54	0.17	1.92	1.01						2.07	0.16	2.08	1.29						2.3	1.65	2.76	1.28
	1.43	1.42	1.49	1.34						1.48	1.65	1.95	0.8						1.74	0.43	1.87	0.56						2.05	1.75	1.56	1.18						1.7	1.13	1.5	0.33						2.21	0.88	1.84	1
	1.83	0.28	2.17	0.98						1.85	0.21	1.46	1.08						1.77	0.61	1.84	0.84						1.44	0.87	1.82	1.05						2.15	0.77	2.07	0.99						1.87	2.59	2.07	0.92
	1.5	0.76	1.95	1.3						2.02	1.17	1.88	0.88						1.62	0.56	1.67	0.99						1.97	0.71	1.83	0.96						1.67	0.67	1.66	1.15						1.74	1.17	3.34	1.29
	1.56	1.76	1.42	0.84						1.63	1.9	2.15	0.75						1.51	0.86	2.03	0.61						1.5	0.8	2.45	0.65						1.73	0.2	1.99	0.95						2.06	0.3	1.7	2.11
	1.43	0.55	1.95	0.78						2.04	0.56	2.25	0.8						1.85	0.31	1.8	1.25						2.56	0.33	1.59	0.82						2.46	0.6	2.16	1.27						2.27	1.73	1.54	1.16
	1.43	1.28	2.42	1.29						1.32	1.66	1.91	0.72						2.27	1.05	1.46	1.37						2.04	1.37	1.66	0.67						1.36	0.14	2.58	1.98						1.9	0.84	2.69	0.85
	0.83	1.24	2.14	1.02						1.05	0.95	1.39	0.26						1.72	2.06	1.53	1.37						1.8	0.17	1.86	0.93						1.51	0.23	1.61	0.8						2.88	0.19	3.08	1.36
	1.14	1.1	1.97	1.14						2.11	1.47	2.12	1.06						1.18	0.57	2.03	0.9						1.26	1.04	2.3	0.82						1.95	1.55	2.37	1.34						1.27	0.5	2.12	0.9
	2	0.91	1.71	1.01						1.75	1.18	2.07	0.8						1.92	2.03	1.52	1.16						1.08	0.5	1.15	1.41						1.31	0.25	1.37	1.09						2.06	1.18	1.71	1.03
	1.2	0.54	1.79	0.81						1.85	0.22	1.03	0.73						1.91	1.18	1.1	0.93						1.29	1.77	2.27	0.97						1.54	0.36	1.9	1.02						1.27	0.18	1.52	1.37
	3.16	1.1	1.89	0.85						2.02	0.71	1.66	0.72						2.35	1.22	2.11	1.26						2.84	0.98	1.68	1.56						2.34	1.56	1.93	0.91						1.96	1.4	1.96	1.02
	1.39	1.07	2.04	0.69						1.79	0.17	1.51	0.66						1.21	1.55	3.25	1.42						1.52	1.25	1.62	0.79						1.46	0.21	1.66	1.07						2.16	1.24	1.46	1.34
	3.81	1.33	1.28	0.82						2.21	1.12	1.28	0.41						1.19	1.5	2.62	1.3						1.45	0.93	2.12	0.69						2.16	1.47	1.91	1						1.83	1.62	1.71	0.53
	3.98	0.77	1.77	1.01						1.84	0.38	2.23	0.69						1.74	0.22	2.12	0.36						1.41	1.83	1.63	1.1						2.42	0.86	2.02	0.72						1.35	1	1.86	1.46
	2.18	0.43	2.04	1.04						1.49	1.35	1.62	1.76						2.04	0.99	1.48	0.78						1.48	1.23	1.22	0.59						1.04	0.93	2.02	0.87						1.44	0.23	1.6	1.28
	1.64	0.69	1.94	1.39						2.24	1.72	1.84	1.2						1.64	1.19	1.92	0.66						1.55	1.04	1.31	1.23						2.04	1.21	2.96	1.22						2.14	0.59	2.17	0.78
	0.97	0.49	1.31	0.71						1.95	0.41	1.38	2.13						1.61	1.4	2.3	0.8						1.5	0.57	1.86	0.48						1.09	0.66	2.17	1.32						1.46	0.49	1.51	1.73
	1.27	0.75	1.92	1.33						1.64	0.44	1.44	1.18						2.43	1.77	2.61	1						0.93	0.9	1.86	0.92						1.76	1.3	2.16	0.85						2.25	1.42	1.82	1.05
	1.5	0.65	1.72	0.75						1.49	1.2	1.24	1.27						1.53	0.27	2.53	1.05						2.13	0.75	1.92	1.55						1.76	0.6	2.67	0.61						1.84	0.3	2.05	0.66
	1.05	1.72	1.58	1.16						1.91	1.45	1.53	0.58						1.03	1.68	2.07	0.54						1.91	1.43	1.48	0.9						1.33	0.19	2.11	0.83						2.53	0.78	1.88	1.22
	1.04	1.24	1.87	0.64						2.1	0.49	1.68	1.28						1.51	0.56	1.35	1.2						2.06	1.27	2.65	1.21						1.55	0.28	3.52	0.93						2.5	0.62	2.13	0.77
	1.35	1.08	1.54	1.45						2.12	1.48	1.2	0.96						2.3	1.61	1.58	0.96						1.63	0.37	1.41	1.12						1.47	0.86	3	0.96						2.41	1.69	1.93	0.91
	2.36	0.91	1.21	0.85						3.58	0.47	2.13	0.53						1.48	0.18	3.05	1.24						2.21	0.66	1.42	1.23						1.4	0.89	1.64	0.63						1.93	0.76	1.63	0.62
	1.78	0.6	1.52	1.07						1.42	0.79	1.64	1.11						1.46	0.35	1.79	1.51						1.45	1.36	2.56	0.94						1.5	0.8	2.04	0.99						1.39	0.36	2.5	0.85
	1.9	1	1.64	0.89						1.72	0.77	2.04	1.17						1.14	1.17	1	0.27						2.31	1.04	1.5	0.89						2.5	1.07	1.63	0.8						1.75	0.86	2.16	1.06
	1.34	0.84	1.4	1.3						1.51	0.68	1.69	1.1						2.3	1.12	1.88	1.14						1.67	0.17	3.21	1.19						1.58	0.83	2.74	1.23						2	1.65	1.86	1.35
	1.3	0.18	1.62	1.33						1.22	1.64	1.76	0.93						1.61	0.8	1.31	1.24						2.25	1.53	1.71	1.76						1.85	1.4	1.96	1.14						2.39	0.95	2.14	0.98
	1.87	0.63	1.18	0.71						1.36	0.94	1.58	1.06						1.06	0.23	1.84	1.33						2.34	0.86	1.39	1.2						1.65	1.44	1.63	0.98						2.16	1.25	1.88	1.06
	1.53	1.28	1.97	1.6						1.49	0.97	1.43	1.21						1.59	0.78	1.79	0.7						1.51	1.41	1.48	0.81						2.82	0.33	1.5	1.29						2.52	0.42	2.02	0.72
	1.66	0.99	1.63	1.24						2.69	1.56	2.02	1.63						2.05	0.26	1.49	1.08						1.71	0.73	2.1	0.74						1.25	0.32	1.65	1.41						1.61	0.85	2.41	0.86
	2.14	0.62	1.63	0.82						1.73	0.9	1.43	1.1						1.42	1.98	1.35	0.93						1.71	0.93	1.59	0.83						2.38	0.6	2.18	1.1						1.51	0.33	1.35	1.2
	1.9	2.5	1.42	1.21						1.84	0.18	2.08	0.69						1.77	1.08	2.12	0.84						2.08	1.33	1.18	0.74						2.02	1.25	1.95	0.83						2.91	0.43	2.24	1.16
	1.9	0.82	1.33	1.44						1.42	0.49	1.81	2.34						2.02	0.41	1.7	1.21						1.89	0.9	1.58	1.63						2.25	0.75	1.75	0.78						2.29	0.36	2	1
	1.45	1.5	1.01	0.47						2	1.02	1.97	1.2						1.64	1.4	1.76	0.58						1.46	0.26	2.62	0.86						1.41	0.3	1.73	0.72						1.5	2.58	1.98	0.52
	1.54	0.48	1.58	0.86						1.61	0.35	2.12	1.06						2.78	1.22	1.97	0.66						1.51	1.33	1.93	0.77						1.17	0.22	1.17	1.33						1.66	1.04	1.58	1.23
	0.98	2.27	1.39	1.09						1.94	1.02	1.35	1.04						1.35	1.78	1.8	0.86						1.46	0.18	2.96	1.19						1.47	0.52	1.24	0.9						1.88	0.31	3.25	2.86
	1.18	0.77	1.57	0.89						3.12	0.31	2.24	0.56						1.61	0.3	2.24	0.69						1.74	0.7	1.85	1.57						1.67	0.93	1.95	1.45						2.71	0.33	2.33	0.71
	1.29	2.07	2.26	0.81						4.57	1.39	1.94	1.01						3.22	0.92	1.62	1.25						1.93	1.02	2.73	1.09						1.28	1.1	1.63	0.73						2.46	1.84	3.21	0.72
	1.54	1.18	1.71	1.04						1.47	1.61	1.23	0.84						2.58	0.89	1.87	0.93						1.42	1.13	2.62	1.07						2.3	1.21	1.64	1.2						3.41	0.38	2.7	0.95
	1.62	0.21	2.21	1.08						3.11	0.84	2.28	0.84						1.44	1.01	1.85	0.82						1.43	0.58	2.2	0.44						2.21	1.79	1.95	1.01						2.09	0.8	1.69	0.96
	1.48	0.83	1.03	0.36						1.06	1.23	1.73	0.88						1.21	1.11	1.58	0.87						1.4	0.4	1.78	1.43						1.72	1.18	1.74	0.85						3.7	0.47	2.08	0.6
	1.11	0.9	1.87	0.97						1.25	1.4	0.84	0.9						1.09	0.46	1.12	0.75						1.96	0.8	3.37	1.03						1.35	0.82	2.07	1.2						2.09	1.44	2.96	0.81
	1.25	0.9	1.12	1.53						1.34	1.01	2.34	0.86						2.19	0.29	1.52	1.42						1.48	0.91	1.74	1.84						2.25	1.05	1.22	0.87						2.95	0.87	2.33	0.59
	1.66	1.22	1.12	0.65						1.6	0.12	1.08	0.42						1.48	1.18	1.59	1.11						1.04	0.26	2.09	0.58						2.2	1.49	1.37	0.83						1.35	1.75	2.21	0.61
	1.31	1.37	1.19	1.4						1.9	0.23	1.38	1.52						2.09	1.08	2.39	1.03						1.1	0.6	1.7	1.23						2.15	1.5	1.62	1.2						2.28	0.95	3.34	0.95
	1.54	1.13	1.67	0.83						1.69	0.57	1.52	0.82						2.14	1.4	1.41	0.97						1.76	0.52	1.91	1.36						2.13	0.95	1.11	1.5						1.91	1.72	2.85	0.52
	1.91	0.89	1.87	0.73						2.1	0.59	1.44	1.14						1.15	1.32	2.37	1.3						2.14	1.09	1.9	1.7						1.41	0.65	1.48	1.34						3.6	0.51	1.52	1.08
	1.92	0.8	1.75	1.16						1.92	0.72	1.33	0.79						1.64	0.76	1.45	1.58						1.48	1.13	1.7	1.12						2.51	0.93	1.84	1.03						1.63	0.43	2.48	0.92
	1.52	1.55	2.05	1.04						0.89	0.41	1.16	0.7						1.67	1.28	1.44	0.96						1.67	0.45	1.35	1.39						1.64	0.96	1.66	0.59						1.61	0.86	1.85	1.45
	1.54	0.48	1.76	1.17						1.01	1.44	1.06	0.26						2.38	1.41	1.57	0.92						2.16	1.22	1.25	1.04						0.98	0.77	1.82	0.74						2.22	0.46	2.05	0.75
	1.62	1.32	1.55	0.8						2.3	0.26	1.1	1.1						1.94	0.42	1.63	1.17						2.02	0.98	1.21	1.08						2.9	0.33	1.29	0.96						2.38	0.57	2.31	1.01
	1.23	1.32	1.71	1.43						2.46	1.25	1.36	1.05						1.72	1.25	1.83	0.43						1.69	0.78	1.17	1.19						2.17	1.04	2.08	0.84						1.73	0.38	1.79	1.26
	1.51	1.78	1.52	0.67						1.39	1.47	1.84	0.86						1.08	1.64	1.38	0.75						2.45	1.6	1.42	1.43						2.05	1.67	1.23	2.67						1.68	0.16	2.31	0.49
	1.2	1.18	1.88	0.92						2.42	1.03	1.92	1.29						1	2.34	1.43	1.32						1.92	0.76	1.77	0.9						1.99	1.61	2.17	0.95						2.24	2.36	1.86	0.54
	1.92	1.09	1.83	1.05						2.13	1.03	1.24	0.72						1.36	0.85	1.76	1.15						1.45	0.49	1.64	0.99						3.01	0.36	1.68	1.11						2.1	1.19	1.66	0.8
	1.26	1.61	1.97	1.1						1.49	1.68	1.29	0.83						1.77	0.73	1.94	0.57						2.45	0.8	1.45	0.89						1.96	1.68	1.97	1.1						1.92	0.96	2.04	0.98
	1.25	1.08	1.99	0.77						1.38	1.25	2.43	0.72						1.48	0.79	1.48	0.71						1.25	1.44	2.2	0.64						2.81	1.69	1.37	1.31						2.19	1.81	2.81	1.02
	1.44	1.4	1.71	0.77						1.23	1.75	1.37	1.43						1.65	0.82	1.96	0.78						2.02	1.64	1.5	0.7						2.37	1.37	1.53	1.72						2.27	1.18	1.81	0.38
	1.43	1.48	1.38	0.67						1.77	0.35	1.17	0.99						1.97	1.11	1.28	0.85						1.03	1.36	1.47	1.29						2.32	0.87	1.55	0.83						2.22	1.19	2.25	0.58
	1.91	1.03	1.93	1.01						1.05	1.12	2.01	0.75						2.26	1.45	2.32	0.82						1.52	0.47	1.75	1.55						1.93	1.16	1.55	0.98						2.28	0.93	2.86	1.03
	1.21	0.37	2.22	1.01						1.6	0.25	1.31	0.74						1.12	1.72	1.98	1.28						1.56	0.16	1.82	0.99						1.21	0.95	1.73	0.69						1.8	0.65	2.69	0.68
	3.9	1.19	2.21	0.92						1.53	1.03	1.62	0.97						1.72	0.56	1.79	1.31						1.04	1.75	2.79	0.9						2.2	1.56	2.48	0.66						2.59	1.24	1.13	0.88
	1.25	1.13	1.57	1.23						1.02	0.77	1.13	0.63						1.7	0.36	1.62	1.13						0.96	0.14	2.31	0.58						1.84	1.57	1.41	0.96						1.59	0.4	2.16	1.02
	1.91	0.83	1.6	0.88						1.34	2.06	1.31	1.03						1.33	0.4	1.41	1.52						3.01	0.26	1.61	1.29						2.05	1.22	1.65	0.82						2.35	1.85	2.46	0.87
	1.33	1.61	1.83	1.25						1.23	1.14	1.59	1.79						1.44	0.81	2.31	0.84						1.62	0.6	1.81	0.79						2.6	0.79	1.34	0.8						1.93	0.35	2.36	0.91
	2.51	1.01	1.86	0.86						1.47	1.14	2.19	1.36						1.82	0.32	2.23	1.42						1.76	0.34	1.46	0.69						1.88	0.93	1.51	0.7						1.32	1.03	2.34	0.75
	1.71	0.71	1.53	1.27						1.69	0.51	1.81	0.76						0.85	1.58	1.31	0.76						1.03	1.28	2.37	0.98						1.54	0.17	1.67	0.77						2.78	0.93	1.88	1.02
	2.18	0.54	1.17	0.89						1.64	0.95	1.61	0.84						1.22	1.44	2.78	0.6						1.39	0.51	2.11	0.52						1.98	1.44	1.79	0.9						1.93	0.72	2.38	0.68
	1.32	0.71	1.05	0.89						2.59	1.08	1.73	0.65						1.85	0.55	1.88	0.91						1.94	0.94	2.05	1.12						1.58	0.65	2.27	1.12						2.35	0.72	3.41	1
	1.24	0.74	2.39	0.75						1.34	1.76	2.12	1.06						1.17	1.49	1.72	1.17						1.35	0.96	2.86	0.9						2.3	1.06	1.76	0.49						1.88	1.21	2.76	1.21
	1.28	1.06	1.39	1.25						1.91	0.36	3.12	1.01						1.83	0.25	2.56	1.26						0.96	2.39	1.53	0.52						1.57	0.7	2.17	0.91						1.03	0.77	1.89	0.77
	1.45	1.39	1.44	0.77						1.38	0.96	1.47	1.24						2.35	1.47	1.73	1.28						1.89	0.95	1.81	0.77						1.8	1.73	2.54	1.17						2.5	1.09	2.51	1.19
	2.16	0.95	1.44	0.36						1.56	0.6	2.23	0.74						1.28	3.19	1.59	0.86						1.28	0.26	1.49	1.29						2.26	1.27	1.41	1.26						1.34	0.33	1.92	1.4
	1.55	1.03	1.25	1.81						1.73	1.12	2.05	1.11						2.53	1.23	2.26	0.55						1.86	1.39	2.03	0.71						1.72	1.43	1.3	1.5						2.06	0.7	2.41	1
	1.52	0.44	1.23	0.59						1.85	0.4	1.45	1.15						1.65	0.85	1.85	1.11						1.39	0.75	2.2	0.67						2.11	1.48	2.74	0.78						2.03	1.58	2.16	1.29
	1.4	1.61	1.62	0.83						1.36	1.48	2.48	0.99						1.72	1.46	1.43	2.02						2.09	1.27	1.98	0.77						1.81	1.41	1.67	1.34						1.83	0.37	1.91	1
	1.62	1.41	1.63	0.98						1.72	0.21	1.84	1.59						1.48	0.3	1.61	1.46						0.99	0.8	2.25	0.87						1.72	0.31	2.12	1.22						1.48	0.6	1.82	1.1
	2.37	1.65	3.57	1.43						1.65	1.66	1.5	0.73						1.98	1.27	1.02	0.86						1.91	1.29	2.06	0.74						2.31	1.33	2.91	1.23						1.92	1.24	2.73	2.27
	1.77	0.33	1.96	0.9						2.11	0.2	1.53	0.96						1.55	1.8	1.82	0.94						1.43	0.29	1.28	0.59						2.23	1.42	1.58	1.54						2.13	1.28	2.17	1.83
	1.04	0.29	2.35	1.25						1.69	0.87	1.52	1.36						1.51	1.45	1.4	0.94						1.8	1.44	1.77	0.63						2.31	1.46	1.65	0.62						2.36	1.31	3.19	1
	1.29	2.26	2.17	1.02						1.56	1.27	1.3	1.4						1.47	1.7	1.4	0.82						1.73	1.72	1.34	0.48						1.92	0.97	2.11	0.99						2.27	1.36	2.44	1.24
	1.8	0.99	2.03	1.41						1.55	0.44	1.89	1.65						1.76	1.03	1.78	0.94						2.3	1.33	2.52	0.99						1.43	1.38	1.86	0.63						2.21	0.31	2.02	1.27
	4.18	1.05	1.84	1.13						1.49	0.28	1.66	1.21						2.13	0.26	1.43	1.41						1.9	1.49	1.38	0.88						2.1	2.09	2.5	0.99						1.62	0.64	2.26	0.61
	2.97	0.32	1.32	0.59						2.44	1.42	1.49	1.2						1.05	1.94	1.33	0.39						1.57	0.89	2.57	1.11						3.23	1.01	2.65	0.71						2.11	1.32	1.29	1.02
	1.31	1.43	1.52	1.29						4.87	0.4	1.55	0.9						1.63	0.96	1.26	0.49						1.74	0.65	1.5	1.01						2.29	0.81	2.62	1.3						2.22	1.49	2.17	0.71
	1.47	1.04	0.96	0.72						2.69	0.68	0.98	0.53						2.27	0.37	1.39	0.51						1.77	1.31	1.62	0.71						1.73	0.89	1.63	0.9						2.87	0.9	2.19	1.35
	1.82	0.65	1.12	1.37						0.86	1.6	1.64	1.13						2.55	1.38	1.92	0.9						1.58	0.53	2.45	0.59						1.78	0.29	2.26	0.79						2.09	1.51	2.11	0.91
	1.36	2.05	0.98	1.41						2.39	1.64	1.56	0.67						1.61	0.99	2.03	0.91						1.71	1	2.92	0.71						1.47	0.31	2.05	0.95						2.33	1.18	1.92	0.87
	1.85	0.96	1.89	1.71						1.04	1.85	2.09	1.28						2.92	1.07	1.2	1.42						2.32	1.13	2.79	0.91						2.16	0.88	1.86	1.2						1.37	0.26	2.53	0.75
	1.57	0.55	1.81	0.93						1.46	0.44	2.04	0.94						1.95	0.88	2.06	1.27						1.82	1.29	1.69	0.99						2.54	0.34	1.48	1.98						1.68	1.67	2.74	0.25
	1.61	0.56	1.35	0.98						1.2	1.31	1.21	0.85						1.74	2.52	1.89	0.45						1.2	1.65	2.45	0.92						2.17	0.72	2.31	0.94						1.91	2.5	2.09	1.02
	1.85	0.33	1.39	1.18						1.53	0.88	2.45	0.53						1.62	0.32	2.03	0.95						1.66	0.24	1.32	1.5						2.04	1.51	1.53	1.75						1.72	0.87	1.61	1.81
	1.32	1.41	1.59	1.08						2.18	1.64	1.29	1.05						0.97	1.61	2.13	0.31						1.66	1.18	2.01	1.6						2.02	1.04	1.75	1.2						1.99	0.71	1.59	1.08
	2.25	0.95	1.62	0.94						1.11	0.77	3.67	1.65						1.3	1.61	1.66	0.49						1.12	0.56	2.31	1.3						1.16	1.04	1.26	1.09						2.72	1.52	2.25	1.08
	2	0.42	1.69	0.76						1.24	0.67	1.84	0.88						1.2	1.96	1.31	1.32						2.01	21.88	1.65	0.83						1.77	1.09	1.61	0.82						3.99	0.32	2.57	0.77
	1.78	0.2	1.78	1.14						1.89	1.38	1.19	0.98						2.25	1.77	1.69	1.11						1.97	1.41	2.02	0.56						1.32	0.56	1.63	1.66						2.38	1.65	3.14	1.63
	1.05	1.48	1.49	1.14						2.04	0.76	1.59	1.09						1.73	0.57	1.31	0.67						1.76	1.36	1.83	0.83						1.93	1.53	2.09	2.2						2.12	0.85	1.02	0.67
	1.59	0.8	1.21	1.07						1.46	0.57	1.42	0.94						1.7	1.11	3.62	1.09						1.74	0.28	1.46	0.96						0.97	1.21	2.46	0.84						1.62	1.86	2.23	1.17
	1.74	1.13	1.32	1.02						1.77	0.72	1.27	1.65						2.39	0.48	1.89	1.29						1.42	0.13	2.16	0.7						1.65	0.95	2.44	0.86						1.47	1.74	2.74	1.25
	1.75	1.26	1.45	1.41						1.81	0.37	1.86	1.32						1.96	0.32	3.74	0.66						2.02	1.21	1.93	0.78						2.1	0.82	1.74	1.3						1.98	0.53	2.15	1.04
	1.69	1.48	1.17	1.31						1.98	0.46	1.46	1.08						1.48	0.79	1.41	1.23						1.61	0.25	1.59	1.45						1.83	1.02	2.65	1.03						1.35	0.37	2.1	0.57
	1.69	0.51	1.15	0.76						1.61	0.6	1.79	0.81						2.29	2.16	1.63	1.13						1.82	1.89	2.2	0.63						2.53	1.14	4.5	1.18						2.33	1.79	1.44	0.8
	1.79	2	1.24	0.73						1.82	0.31	1.3	1.19						1.62	0.96	1.16	1.26						1.54	0.59	2.09	0.92						2.08	1.18	2.37	0.8						2.06	0.84	2.55	0.74
	2.26	0.59	1.07	0.6						1.39	0.74	0.79	1.46						2.03	0.41	1.4	0.78						1.83	0.67	1.69	1.04						1.74	1.66	2.5	0.7						1.66	1.38	2.17	1.88
	4.62	1.52	0.95	0.75						1.35	0.99	1.6	1.1						1.53	0.63	2.31	0.97						1.97	1.28	2.09	0.92						2.65	0.55	1.8	0.91						1.91	0.43	1.83	0.87
	1.4	1.12	1.28	1.21						1.45	0.49	1.17	1.12						1.56	0.81	1.45	0.71						1.33	0.79	2.9	0.98						1.82	0.82	2.04	0.91						3.38	0.3	1.86	1.33
	1.86	0.49	2.01	1.17						1.55	1.22	1.33	0.72						1.66	0.31	1.69	1.95						1.3	0.85	2.04	1.15						1.9	2.21	1.6	0.93						1.17	1.43	1.3	2.14
	1.2	1.27	1.33	1.5						1.25	1.41	1.6	1.15						1.87	0.31	1.2	0.6						1.45	0.26	2.29	0.98						2.05	1.23	1.84	1.18						2.28	1.89	1.56	0.63
	1.58	0.95	1.3	1.31						1.56	1.18	1.87	0.61						1.38	1.01	1.78	1.61						1.11	1.82	1.88	1.31						3.03	0.41	1.85	1.07						1.63	0.75	1.78	1.01
	1.27	1.34	1.95	1.36						1.31	1.99	1.4	0.74						1.82	0.32	2.02	1.05						1.9	1.3	1.85	0.58						1.18	1.33	2.09	0.82						1.59	0.93	2.32	1
	1.71	0.29	1.25	0.59						2.3	0.64	1.28	1.95						1.52	0.89	1.74	1.21						2.24	1.31	1.71	1.55						1.74	1.36	1.65	1.1						2.06	0.87	1.47	1.24
	1.57	1.4	1.47	0.8						1.39	1.55	1.9	1.31						1.66	0.57	1.42	0.55						2.08	1.61	2.91	0.82						1.8	1.16	1.88	1.73						2.03	0.63	1.57	0.69
	1.91	1.2	2.09	1.69						1.94	0.61	2.33	0.79						1.79	1.31	1.33	1.23						1.77	1.3	1.45	1.51						1.03	0.79	1.97	1.23						2.43	0.41	1.77	0.72
	1.28	0.68	1.82	0.65						1.68	0.74	1.68	1.21						1.43	0.81	2.24	0.49						2.45	1.76	1.6	1.43						2.11	0.85	2.02	1.11						1.64	0.37	2.55	0.99
	2.19	1.16	1.69	0.82						1.44	0.66	2.14	1.38						1.16	1.72	1.11	1.01						2.04	1.89	1.46	1.03						1.76	0.27	1.36	0.93						2.23	1.49	2.63	1.12
	2.39	0.94	1.21	1.51						1.92	0.39	1.86	1.01						1.6	0.26	2.53	0.94						1.93	1.52	1.06	0.81						1.77	0.99	2.25	0.63						2.15	0.15	1.98	1.23
	1.98	0.69	1.77	1.55						2.03	0.91	2.83	1.25						1.1	1.08	1.78	0.66						1.63	0.77	1.67	0.64						2.06	1.31	1.57	0.99						3.17	0.89	2.26	0.89
	1.41	1.1	1.56	1						1.26	0.47	1.38	1.09						1.65	0.18	1.98	1.39						1.04	0.63	1.83	0.5						1.98	1.35	1.72	1.22						2.51	2	3.36	0.81
	1.99	0.48	1.99	1.01						1.31	1.19	2.97	1.38						1.84	0.38	1.61	1.15						1.72	0.72	1.49	0.83						1.83	1.42	1.76	1.07						2.89	0.36	1.36	0.59
	2.33	0.95	1.64	0.81						1.58	0.22	1.21	0.5						2.48	1.03	1.51	1.3						1.2	0.62	3.01	1.06						2.01	1.5	1.17	0.89						2.17	0.79	1.91	1.04
	2.01	0.7	2.66	0.87						2.69	1.16	1.77	0.69						1.79	0.34	1.88	1.02						2.1	1.96	1.6	1.21						2.51	0.78	1.65	1.02						3.29	0.44	2.27	1.79
	1.87	0.98	2.04	1.16						1.52	1.01	1.12	0.64						1.77	0.33	2.57	1.25						1.52	1.65	2.47	0.67						2.05	1.38	2.01	1.14						2.81	0.49	3.06	0.92
	1.69	0.75	1.82	0.84						2.19	1.32	1.1	0.55						1.42	2.78	1.24	0.73						1.26	1.34	2.19	1.17						1.63	1.36	1.58	1.13						2.26	0.53	3.81	1.12
	2.51	1.23	2.17	1.03						1.52	1.2	1.29	0.58						1.54	0.78	1.23	0.97						1.25	1.61	2.2	0.82						1.49	0.44	1.48	1.31						2.23	1.04	1.96	0.73
	1.17	0.55	1.51	0.64						1.44	2.22	2.07	0.61						1.25	0.78	1.06	1.27						1.32	1.86	2.71	0.66						1.71	0.89	1.63	1.76						2.21	1.06	3.43	0.94
	1.29	1.19	1.57	0.71						2.06	0.93	1.17	0.77						2.23	1.4	1.59	1.25						1.28	1.67	2.64	0.76						1.16	1.63	1.26	0.81						1.77	0.55	1.65	2.98
	2.42	0.82	1.65	0.66						1.67	0.37	1.36	1.71						2.65	1.55	1.93	0.76						1.14	0.82	1.67	1.09						1.48	0.1	1.44	0.82						2.89	0.47	2.69	0.64
	1.59	0.26	1.44	1.75						1.74	0.49	1.3	1.28						1.98	0.41	2.64	0.75						1.73	0.56	2.33	1.01						1.13	1.49	1.44	0.49						2.32	0.3	1.64	1.58
	1.17	0.92	1.74	1.66						1.89	0.33	1.42	1.3						1.71	0.26	2.12	0.74						1.88	1.6	2.26	1.1						1.47	0.88	1.42	1.02						2.1	1.15	2.41	1
	1.88	0.24	1.93	1.44						1.33	1	1.28	0.81						1.52	1.06	1.58	0.82						2.28	0.71	1.86	1.11						1.73	1.61	1.32	1.38						2.29	1.06	3.1	1.03
	1.54	0.52	2.02	0.93						1.22	1.42	1.69	1.25						2.05	1.63	1.57	0.72						1.94	0.49	1.49	0.92						2.93	0.28	2.2	1.52						2.3	1.14	1.94	0.66
	1.52	0.64	1.22	0.43						3.99	1	0.93	1.1						1.48	1.15	1.38	0.87						2.12	1.53	2.44	1.1						1.59	0.84	1.35	1.26						2.8	0.74	1.7	1.06
	1.47	0.49	1.25	0.07						0.79	2.25	3.61	0.69						1.48	0.77	1.92	1.31						1.89	1.05	1.96	1.18						2.25	0.54	1.23	1.35						2.09	1.24	1.24	0.98
	1.95	0.41	1.11	1.08						1.65	0.91	1.27	1.2						1.3	0.8	1.6	0.71						1.56	0.55	1.75	0.84						1.97	1.12	2.12	1.15						1.62	1.26	2.91	0.85
	1.88	0.7	1.42	1.03						2.08	0.37	1.97	1.29						1.55	2.08	1.3	0.3						2.1	0.72	1.85	1.14						2.06	1.03	1.56	0.88						1.44	1.36	2.39	1.07
	1.51	0.76	2.11	0.7						1.56	1.13	1.9	0.84						1.47	1.53	4.07	0.17						1.27	0.9	1.85	0.8						1.2	0.45	1.21	0.44						1.5	1.28	1.64	0.76
	1.85	0.95	1.55	0.96						1.41	1.75	1.31	1.07						1.87	0.35	1.88	0.41						1.88	0.75	2.53	1.1						1.83	2	1.99	1.4						2.41	0.87	7.86	5.16
	4.2	0.65	1.41	1.73						1.16	0.83	1.51	0.74						2.13	0.35	1.76	0.89						1.56	0.94	2.42	1.15						1.85	1.03	1.82	0.88						2.27	1.79	2.49	0.62
	1.48	1.13	1.58	0.75						1.66	0.23	1.58	0.63						1.48	1.15	1.73	1.21						1.67	1.29	1.93	0.83						1.57	0.21	1.88	0.9						2.3	0.68	2.96	1.2
	1.97	0.29	1.69	0.7						1.74	0.95	1.54	0.68						1.66	0.74	1.59	1.54						1.63	0.29	1.95	0.96						1.41	0.64	1.36	0.98						1.19	0.67	1.7	1.88
	1.73	0.55	1.91	1.02						1.37	0.58	1.28	0.83						1.98	0.44	2.81	1.07						1.41	0.28	2.5	1						1.7	0.83	1.59	0.78						2.18	0.99	1.47	1.12
	1.87	0.18	1.93	1.55						1.73	0.25	1.86	0.84						1.21	1.2	2.56	1.05						1.65	0.74	2.09	1.04						1.9	0.83	1.71	1.13						2.36	1.46	1.88	0.71
	3.01	2.08	2.27	0.98						1.95	0.27	1.27	0.7						1.15	2.27	1.86	0.34						2.02	1.7	1.42	0.79						1.38	0.53	1.13	0.89						1.85	1.5	1.87	1.29
	1.12	1.1	1.2	0.99						1.34	1.54	2.23	0.87						1.73	0.3	1.45	0.94						2.48	1.4	1.93	0.92						1.65	0.33	2.02	0.76						2.49	1.1	2.35	1.23
	1.33	2.27	1.97	1.36						1.59	1.27	2.12	0.99						1.76	1.76	2.2	0.53						1.93	1.13	2.31	1.2						1.92	1.12	1.52	1.12						2.09	1.04	1.9	1.6
	1.7	1.17	1.6	0.89						1.42	1.47	2.17	1.19						1.63	1.21	1.41	0.86						1.95	0.22	1.54	0.8						1.5	0.43	1.12	0.64						1.91	2.72	2.69	0.36
	2.04	0.77	2.2	0.61						1.9	1	1.27	1.01						2.16	1.51	2.58	0.55						2.15	1.28	2.27	0.94						1.94	1.58	1.71	1.27						1.31	1.01	2.9	1.62
	1.94	1.43	1.9	1.36						1.96	0.23	1.63	0.85						1.29	1.5	1.9	0.8						1.42	1.28	1.5	0.81						2.4	0.81	1.73	1.27						1.12	1.2	2.11	0.58
	2.55	1.4	1.14	1.08						1.66	0.57	1.62	1.26						2.27	1.05	1.86	1.08						1.83	0.24	1.83	1.64						1.8	1.64	1.68	0.66						2.57	0.69	1.6	1.39
	2.36	1.16	3.34	0.84						1.34	1.06	3.72	0.65						2.32	1.02	2.72	0.47						1.83	0.96	1.3	0.78						2.34	1.44	2.73	0.87						1.94	1.31	1.9	0.82
	1.73	0.65	2.2	0.81						1.58	0.92	3.94	1.7						1.5	0.86	1.54	0.64						1.4	0.46	1.42	1.1						1.1	0.85	1.79	1.02						1.48	0.92	1.43	0.78
	1.73	1.15	1.87	1.02						1.93	1.4	3.72	0.29						1.4	0.99	1.58	0.85						2.14	1.29	1.39	1.05						1.74	1.71	1.49	0.68						1.89	1.13	3.48	1.03
	1.28	2.02	1.8	1.2						1.83	0.53	1.48	0.81						1.03	1.27	1.85	1.04						2.33	0.74	1.83	1.06						2.48	1.23	1.5	1.03						1.97	1.89	3.21	1.45
	1.64	1.17	3.58	0.69						1.71	0.33	1.77	0.11						1.21	2.52	1.57	0.98						1.43	0.54	1.54	0.79						1.97	0.93	1.69	0.78						2.48	2.25	2.35	1
	1.31	1.19	1.57	0.76						2.18	0.84	1.69	0.89						1.7	0.12	1.36	1.52						2.01	1.2	2.61	0.75						1.8	1.25	2.47	0.74						2.15	0.89	1.7	0.56
	1.53	0.21	2.72	0.61						1.14	2.34	1.57	1.22						2.23	1.06	1.91	0.77						1.63	0.44	1.77	0.58						1.76	1.67	2.74	1.09						3.52	0.67	1.91	1.03
	1.89	0.59	2.29	1.06						1.04	0.92	1.25	0.45						1.58	0.37	1.44	0.8						1.54	0.41	2.06	1.25						2.12	0.86	1.87	0.99						1.92	0.37	1.84	0.56
	2.28	1.53	1.2	0.99						1.48	1.06	1.3	0.42						1.64	0.23	1.85	1.11						2.01	1.41	2.73	0.86						1.77	0.72	1.46	1.55						1.58	1.07	2.22	1.06
	1.8	0.7	1.75	1.29						2.44	1.18	1.08	1.08						1.47	0.78	2.07	0.75						1.66	0.98	2.19	0.89						2.23	1.12	1.91	0.98						1.69	0.26	2.32	1.63
	2.26	1.08	1.6	1.08						1.51	2.2	1.36	0.82						1.12	1.4	1.96	1.24						1.93	1.64	1.53	0.75						2.01	0.37	1.77	1.13						1.23	0.44	2.16	1.39
	1.56	1.15	1.77	1.09						1.99	0.96	1.29	0.52						1.87	0.53	1.33	0.66						2.45	0.95	1.73	1.55						2.59	0.96	2.64	1.16						1.39	0.18	2.15	0.88
	2.91	0.68	1.68	0.92						1.91	0.34	0.99	1.12						1.6	0.27	1.3	0.92						1.79	1.38	1.66	0.89						2.21	0.67	2.02	0.9						2.23	1.05	2.6	0.86
	4.39	0.88	2.1	1.06						2.01	0.32	1.4	1.41						1.54	0.29	1.73	0.99						1.32	0.22	1.58	1.09						1.62	1.58	1.65	0.76						1.83	1.33	1.71	0.98
	1.59	0.84	1.48	1.09						2.3	1.02	1.34	1.83						1.44	1.78	2.01	0.66						1.43	0.56	1.43	0.87						2.41	0.88	1.74	1.53						5.3	0.61	3.29	1.53
	1.53	1.23	2.02	1.04						1.28	0.91	1.19	1.33						1.97	0.38	1.79	0.89						1.37	0.68	2.5	0.83						2.21	0.96	2.19	0.88						1.98	1.36	1.98	0.61
	1.64	0.62	1.77	0.83						1.67	1.05	1.54	1.44						0.97	1	2.46	0.76						1.97	1.46	1.45	0.91						1.87	2.05	1.65	1.19						1.9	0.43	1.95	1.59
	1.38	1.24	1.81	0.54						1.16	0.86	1.9	0.89						1.46	0.62	1.41	1.78						1.21	1.03	1.61	0.7						1.18	0.81	1.88	1.24						2.12	1.81	2.39	0.95
	1.61	0.91	1.35	1.15						3.81	0.28	1.41	0.97						1.23	1.49	2.26	0.92						1.04	0.87	1.76	1.17						1.66	0.32	2.45	0.78						2.04	2.33	2.6	0.82
	1.93	1.21	1.67	0.68						2.25	0.94	3.1	0.75						1.14	1.55	1.95	0.9						1.33	0.29	1.39	0.97						2.21	1.22	1.66	1.6						1.99	0.95	2.01	0.67
	1.36	1.48	1.94	1.06						2.37	0.21	1.75	1.09						2.34	1.18	1.49	1.41						2.53	1.73	2.42	1.1						1.48	0.23	2.53	1						1.84	1.51	1.29	1.31
	1.03	1.42	1.56	0.89						1.42	1.4	1.05	2.54						1.64	0.74	1.81	1.1						1.14	1.34	1.6	0.75						2.41	0.32	1.93	1.01						1.98	1.23	2.61	1
	1.45	1.3	1.48	1.06						1.76	1.13	1.53	1.09						1.86	1.37	1.62	1.08						1.34	1.43	2.11	0.99						1.74	1.61	1.79	0.89						1.56	1.21	1.81	0.44
	1.52	1.3	1.26	1.1						1.43	1.42	2.08	0.88						1.44	0.35	1.59	1.12						1.49	0.48	1.53	1.01						1.99	1.29	1.6	1.49						1.64	0.49	2.41	1.16
	1.17	0.67	1.11	0.9						0.99	1.47	1.73	0.67						1.57	0.75	2.77	1.1						2.55	0.23	2.28	0.59						2.86	0.85	2.42	0.92						1.37	1.52	1.79	0.51
	1.71	0.45	1.3	1.21						1.94	0.16	2.24	1.05						2.34	1.49	1.79	0.9						0.94	1.13	2.02	1.05						1.6	0.4	1.81	0.78						2.02	1.78	1.39	0.98
	1.78	0.54	1.19	0.61						1.83	1.24	1.47	0.95						1.88	0.88	1.84	0.69						1.63	1.35	1.51	0.75						1.97	2.37	2.09	0.94						2.36	1.19	1.88	0.69
	1.28	0.87	2.03	0.6						1.86	0.66	1.52	1.09						1	0.4	1.57	0.82						1.48	1.34	1.39	0.81						1.65	0.18	2.12	1.35						1.72	1.64	1.64	0.85
	1.7	1.44	1.41	1.04						1.44	1.03	1.79	1.48						2.13	0.6	3.23	1.03						1.93	0.59	1.45	1.78						1.79	1.26	2.31	0.81						4.63	1.4	1.46	1.02
	1.63	1.26	1.54	1.64						1.57	0.32	1.57	1.4						1.56	1.23	2.43	1.2						1.89	1.21	1.38	0.8						2.07	1.37	1.45	1.12						2.17	0.64	2.47	1.11
	1.98	1.57	1.64	0.89						1.39	1.26	1.34	0.62						1.99	0.34	1.34	0.69						1.44	1.33	2.12	1						1.47	0.77	2.31	1.33						2.45	0.94	2.41	1.23
	1.61	0.74	1.55	0.64						1.49	0.75	2.34	0.78						2.63	1.48	1.54	1.29						1.8	2.21	2.38	0.61						2.88	0.8	2.05	1.37						1.67	0.39	2.47	1.02
	1.25	0.78	1.5	1.81						1.73	0.33	1.21	0.78						1.47	1.16	2.22	0.84						2.23	1.3	1.68	0.83						2.4	1.23	1.53	0.93						1.59	1.66	2.22	1.14
	1.35	1.54	1.89	1.05						1.89	0.83	2.34	1.04						1.64	0.76	2.04	1.05						2.72	0.72	1.73	0.81						2.04	1.8	2.63	0.99						1.97	1.04	1.17	0.96
	1.84	0.67	1.04	0.27						1.63	0.36	1.06	0.57						1.17	1.04	1.74	1.16						2.01	1.9	1.63	0.9						3.11	0.95	1.59	0.94						1.46	1.72	1.73	0.68
	1.6	0.81	2.06	0.69						1.67	0.68	1.64	1.17						1.28	0.59	2.19	0.68						1.13	1.06	1.91	1.56						2.44	1.4	1.94	1.39						2.38	0.55	2.21	0.6
	1.95	1.12	1.52	1.04						2.38	1.9	1.78	1.1						2.31	1.2	1.64	0.96						2.69	1.11	2.05	0.68						2.2	1.3	1.37	1.31						2.28	0.38	2.48	0.87
	1.13	0.77	1.26	0.59						1.3	1.37	1.55	1.89						1.37	1.51	1.38	0.55						1	0.75	1.59	1.29						1.6	1.37	1.47	1.32						2.88	0.42	2.04	0.9
	1.68	0.52	1.88	0.81						1.24	1.26	1.84	0.91						2.04	0.86	1.54	1.15						1.43	0.33	1.59	0.83						1.55	0.42	1.55	0.95						1.79	2.15	1.93	0.7
	1.49	1.29	1.43	0.86						1.58	1.67	1.55	1.47						1.16	1.42	1.76	1.07						1.92	1.31	1.67	1.04						1.78	0.91	1.72	0.92						1.8	1.14	2.7	0.46
	1.67	0.72	1.67	1.17						1.74	0.63	1.18	1.29						2.31	1.45	1.22	1.12						1	1.42	2.3	1.03						2.32	1.73	2.62	0.76						1.37	1.88	2.55	0.97
	1.78	1.37	1.96	1.06						1.01	1.1	2.36	0.68						1.84	0.88	1.78	0.78						2.31	1.35	1.63	1.27						2.96	0.07	1.89	1.44						2.61	0.67	2.02	0.83
	2.01	0.69	1.18	0.51						1.32	0.69	1.34	0.88						1.34	1.13	1.73	1.55						1.79	0.76	2.76	1.22						1.62	0.75	1.83	0.95						2.35	0.58	1.75	1.04
	1.79	0.67	1.67	0.84						1.71	0.19	1.79	1.2						1.45	0.83	1.65	0.72						1.77	0.94	1.45	0.47						1.31	0.23	1.03	0.9						3.08	0.6	2.36	0.68
	2.12	0.88	3.59	1.29						1.18	1.37	1.37	1.02						2.47	1.13	2.43	0.96						1.07	1.22	1.98	1.28						1.56	0.45	2.39	1.23						2.82	0.67	2.42	0.52
	2.28	0.85	1.58	0.95						1.23	1.26	1.49	0.85						2.32	0.78	1.68	0.59						2.05	1.51	2.05	1.72						2.48	0.95	1.75	0.28						2.39	1.12	1.49	1.8
	1.07	0.8	1.68	0.86						1.44	1.38	1.02	2.11						1.87	0.27	1.95	1.4						0.97	0.97	2.1	0.62						1.63	0.25	1.73	0.78						1.87	1.46	2.05	0.05
	1.65	1.75	1.87	0.87						1.46	0.6	1.76	0.8						1.47	0.71	1.85	1.11						1.34	1.17	1.53	0.62						1.03	1.41	1.99	0.87						2.23	1.44	1.86	0.72
	2.6	1.08	2.38	0.92						0.71	0.96	1.54	0.34						2.17	1.59	1.39	1.24						2.51	0.27	2.67	1.41						2.3	0.7	1.66	0.97						2.15	0.44	3.05	0.88
	2.36	1.69	1.7	0.84						1.64	1.05	1.34	0.96						1.52	0.93	1.53	0.65						1.87	1.25	1.74	1.12						2.24	1.21	2.07	1.15						2.25	1.09	2.33	0.43
	1.19	0.51	1.47	1.16						1.72	0.43	2.01	1.17						1.67	0.31	1.61	1.03						1.29	1.23	2.52	0.95						2.13	1.13	1.73	1.01						2.61	1.55	1.6	0.57
	1.51	0.57	1.49	1.33						0.94	0.39	1.54	1.01						1.37	1.57	1.51	0.71						2.43	0.48	2.19	0.76						1.3	0.65	1.83	1.18						2	0.83	3.52	1.2
	1.74	0.74	1.39	0.99						2.84	0.69	1.86	0.87						1.56	1.57	1.72	1.04						1.23	1.5	2.45	1.03						1.88	1.11	1.89	1.53						1.41	0.45	2.43	1
	1.84	0.2	1.97	1.04						1.73	0.53	1.15	0.56						1.47	1.12	1.65	1.14						1.95	1.65	1.54	0.78						2.21	0.9	1.18	0.81						2.82	0.29	1.83	0.9
	1.43	0.43	1.08	0.68						1.51	0.72	1.71	1.07						1.47	0.36	2.45	1.12						1.52	0.59	2.21	1.33						1.98	1.45	1.57	0.87						2.16	0.48	1.94	0.4
	2.23	0.9	1.52	0.98						1.19	0.78	1.13	1.24						1.79	1.99	1.67	0.59						1.66	0.15	1.33	0.78						1.67	0.72	1.3	1.52						1.24	0.81	1.88	0.93
	4.26	0.78	1.07	1.13						1.62	1.35	1.54	1.2						1.6	0.89	1.79	1.04						2.21	1.31	1.53	1.25						1.32	0.65	1.83	0.81						2.19	1.56	2.79	0.61
	3.66	0.48	2	0.64						1.63	0.77	1.65	0.69						2.52	1.37	1.74	0.95						2.1	1.38	0.99	0.96						2.94	0.79	2.47	0.81						3.08	0.47	2.7	0.79
	1.89	1.36	1.83	0.84						1.12	1.41	1.08	1.05						5.44	2.25	1.88	0.7						1.16	1.35	1.43	1.18						2.17	0.81	2.35	1.14						2.8	0.47	3.03	0.92
	1.43	0.98	1.95	1.45						1.54	0.49	1.83	0.97						1.11	1.37	2.13	0.97						1.11	1.62	1.38	1.5						1.58	0.36	2.97	1.46						2.72	0.84	2.59	0.93
	1.68	0.74	2.74	1.05						1.67	0.91	1.42	1.3						2.32	1.09	1.67	1.41						1.49	1.44	1.8	1.19						1.17	0.59	2.97	1.21						2.32	0.82	1.91	0.57
	1.35	0.88	1.91	0.99						0.99	0.46	1.51	0.61						1.29	1.08	1.68	1.46						1.54	1.44	1.73	0.72						2.38	1.17	3.26	1.53						3.1	0.55	2.38	0.6
	1.62	0.93	2.8	0.65						1.12	1.4	1.77	1.17						1.97	1.52	2.35	1.1						1.78	1.76	1.44	1.34						2.33	0.82	2.05	1.11						2.95	0.64	2.07	1.27
	1.31	1.72	1.45	1.59						1.97	0.35	1.73	1.18						1.25	0.7	1.8	0.94						2.61	0.93	2.18	1.01						2.19	1.16	1.35	1.52						1.48	0.39	2.4	1.15
	1.74	1.29	1.9	1.24						1.92	0.76	0.99	0.38						1.2	0.83	1.4	1.3						2.84	0.53	1.48	1.74						1.34	0.19	1.29	0.45						2.23	0.79	1.86	1.07
	1.39	0.59	1.19	1.45						1.71	0.29	2.15	0.83						1.51	0.25	1.48	1.09						1.53	1	1.77	0.94						2.19	1.46	1.42	1.55						2.32	0.92	2.67	0.66
	1.67	0.29	2.66	1.08						1.1	1.37	1.32	1.05						1.77	1.08	1.63	0.9						2.22	0.71	1.48	0.79						1.05	0.39	1.97	0.6						2.8	1.03	1.29	1.01
	1.86	0.88	1.55	0.86						2.04	1.76	1.91	0.92						1.16	1.28	1.73	1.31						2.01	2.49	2.98	0.86						1.32	0.55	2.18	0.96						2.44	1.87	2.16	1.3
	1.68	1.35	1.95	0.67						1.33	1.85	1.31	1.48						1.28	0.55	1.61	1.3						2.03	1.23	1.61	1.46						2.38	0.87	1.63	0.77						1.7	0.85	2.74	0.84
	1.64	0.79	1.78	0.92						2.04	0.77	1.82	0.89						1.64	1.13	1.48	2.03						1.6	0.24	2.41	1.24						1.57	0.33	1.44	0.68						1.76	1.81	1.77	0.25
	1.21	0.86	1.42	0.96						1.59	0.79	1.84	0.85						1.5	0.21	1.68	0.93						2.47	0.95	1.54	0.51						1.47	0.77	1.9	0.6						1.95	1.64	2.85	0.87
	2.33	1.76	2.49	1.12						1.44	0.94	1.65	0.73						1.41	0.94	1.65	0.78						1.7	1.17	1.62	1.35						1.15	1.28	1.56	1.32						1.56	1.33	2.42	0.86
	1.35	1.34	1.8	0.82						1.5	1.6	3.24	0.82						1.7	1.25	3.68	1.15						2.17	1.24	2.09	0.82						1.7	0.92	1.69	0.56						1.86	1.24	1.7	0.59
	1.98	1.14	1.27	1.28						1.66	0.45	1.48	1						1.59	0.9	1.27	0.57						1.33	0.67	1.32	0.72						1.72	1.36	1.66	1.36						2.45	0.68	1.78	0.75
	1.98	0.21	1.82	0.8						1.63	0.71	1.37	0.68						1.93	1.62	2.37	1.11						1.57	0.29	1.52	0.83						2.26	0.92	1.47	1.01						3	0.29	2.33	0.51
	1.01	1.11	2.01	1.14						1.61	1.56	1.31	1.47						2.25	0.9	1.59	1.47						1.57	0.31	2.61	1.17						1.96	1.18	1.72	1						3.25	0.24	1.43	0.25
	1.49	1.7	1.73	1.47						1.81	0.35	1.85	1.56						2.32	0.68	1.41	0.95						1.49	0.54	1.96	0.78						1.98	1.78	1.93	0.61						1.74	2.47	2.15	1.43
	1.19	1.67	2.11	1.06						2.3	1.25	2.47	1.37						1.66	1.48	1.89	0.94						1.78	1.63	1.36	0.84						2.45	0.33	2.16	1.06						2.1	1.12	2.88	0.63
	1.24	0.57	1.62	0.99						2.57	1.13	1.08	0.3						1.53	1.52	2.75	0.94						2.54	1.25	1.52	1.65						1.69	0.13	1.61	0.77						2.17	1.57	1.34	1.48
	1.98	0.94	1.69	1.27						1.69	0.87	1.77	1.23						1.87	0.26	2.12	0.77						1.58	0.24	1.53	1						1.52	0.47	2.23	1.38						1.98	1.47	1.97	0.86
	1.91	1.19	1.58	0.78						1.61	0.26	1.19	1.46						1.56	1.47	1.9	1.04						1.19	0.45	2.45	0.68						1.52	0.17	2.25	1.39						1.32	0.52	3.15	1.41
	1.33	1.21	2.09	0.92						1.3	2.26	2.12	1.49						1.15	1.09	1.34	0.82						1.61	0.27	1.49	0.63						2.37	0.58	1.97	1.21						2.51	0.91	2.08	1.1
	1.18	0.77	1.45	0.4						1.92	0.28	1.9	1.27						1.49	1.3	2.27	1.19						2.3	1.1	3.02	1.14						2.26	1.45	1.39	0.7						1.61	0.85	2.44	1.05
	1.06	0.88	1.93	0.61						1.25	1.03	1.66	0.44						1.65	0.81	1.47	0.94						1.62	1.46	0.95	0.52						2.06	1.88	2.55	1.14						1.58	0.12	2.39	0.84
	2.22	1.1	2.12	1.04						1.47	1.47	1.85	1.09						1.52	1	1.48	0.29						1.32	0.78	2.06	0.86						1.23	0.68	1.32	0.62						1.23	1.34	2.55	1.02
	2.08	1.18	1.66	1.35						1.84	0.5	4.66	0.93						1.38	1.51	1.16	0.77						2.59	1.34	1.33	1.47						2.93	1.37	1.29	0.56						2.35	1.36	2.28	0.66
	2.33	1.06	1.02	1.34						1.87	0.33	1.49	1.04						1.9	0.82	1.23	1.43						1.38	1.05	1.32	0.62						2.38	1.12	1.84	1.23						1.7	0.14	3.02	1.04
	1.73	0.71	1.66	1.18						1.11	1.04	1.06	0.55						2.2	1.16	1.82	0.91						2.47	2.12	2.18	0.89						2.51	1.06	3.01	1.31						1.48	0.34	1.82	0.84
	1.96	0.28	1.97	0.93						1.98	1.47	1.75	1.4						1.68	0.68	1.15	1.16						1.72	0.96	2.53	0.85						1.96	1.34	1.26	0.32						1.69	0.34	1.45	0.77
	1.85	0.36	2.06	1.04						1.9	2.37	1.43	1.27						3	1	1.65	1.01						1.9	1.08	1.31	1.49						1.46	0.61	2.07	1.28						1.25	0.41	2.45	0.77
	2.43	0.93	1.71	0.06						1.2	1.25	1.44	1.52						1.87	0.59	1.66	0.62						1.41	0.99	1.6	1.09						1.91	0.88	2.57	0.92						1.86	2.63	2.04	1.34
	1.51	0.79	1.87	1.17						1.35	1.29	1.61	1.46						1.01	0.9	1.57	0.92						2.21	1.87	1.43	0.73						1.92	2.37	1.67	1.01						1.39	0.31	2.34	1.13
	1.83	0.43	1.55	1.35						2.13	0.47	1.35	1.29						1.5	1.43	1.77	0.98						1.67	0.31	4.74	1.01						1.86	1.45	1.89	1.1						1.78	1.27	3.04	0.74
	2.32	1.2	1.32	1.04						1.79	0.3	1.96	0.7						1.85	0.27	2.68	1.51						1.6	0.98	8.94	1.54						1.64	0.94	1.54	0.75						1.8	1.27	2.31	1.04
	1.56	1.33	2.09	1.25						1.25	1.12	1.67	1.2						1.92	1.2	1.24	1.13						1.66	0.62	1.59	0.96						2.07	1.03	2.35	1.06						2.98	0.29	1.65	0.59
	1.53	0.71	2.47	0.84						1.07	0.38	1.15	1						1.62	1.02	1.58	0.89						2.32	1.24	1.66	0.5						1.77	1.25	1.24	1.82						2.02	0.99	2.14	0.67
	1.27	0.2	2.65	1.01						1.74	0.92	1.16	0.66						1.85	0.61	1.59	1.32						1.28	1.3	1.59	1.4						1.28	0.13	1.38	1.06						1.96	0.32	2.05	1.44
	1.75	0.34	1.17	1.32						1.46	2.27	1.38	1.17						2.32	1.26	5.47	2.81						1.93	0.27	2.35	0.96						1.45	1.69	1.6	1.35						2	1.21	1.79	2.06
	1.88	0.54	1.41	0.87						1.74	0.22	1.19	0.85						1.41	1.65	1.52	0.85						1.84	1.35	1.85	0.7						3.04	0.58	1.54	0.91						1.49	1.88	2.75	0.66
	1.45	2.06	1.49	0.75						1.28	1.33	1.56	1.49						1.84	1.54	1.56	1.18						1.45	0.83	2.01	0.87						1.67	0.98	3.1	1.08						1.28	0.5	1.37	0.88
	2.26	0.83	1.36	0.97						1.12	1.06	1.67	0.96						1.41	1.72	3.03	1.05						1.69	1.19	2.46	1.05						1.48	0.15	1.88	0.88						1.31	0.95	3.23	0.9
	1.6	0.37	1.45	1.3						1.5	1.47	1.47	0.8						1.69	2.12	1.74	1.45						1.57	0.66	1.79	0.78						1.57	0.9	2.59	0.75						1.44	0.8	2.09	0.73
	1.96	0.78	1.64	0.71						1.49	1.3	1.85	0.7						1.73	0.74	1.59	1.21						1.65	0.24	1.3	0.96						2.37	1.05	1.12	1.65						2.32	1.16	2.82	1.04
	1.36	1.5	1.24	0.66						1.16	0.8	1.96	0.86						1.39	1.61	1.85	1.03						1.77	0.24	1.53	0.99						2.75	1.01	2.29	0.84						2.43	1.79	1.61	1.41
	1.94	0.9	1.94	0.78						1.21	1.36	1.08	0.76						1.42	1.14	1.46	1.03						2.84	1.24	1.62	1.13						2.67	0.89	1.37	0.57						1.56	0.6	1.9	0.58
	3.14	1.23	1.74	1.49						1.42	1	1.37	1.08						1.36	0.8	1.15	0.93						1.93	1.43	2.03	1						1.81	1.55	1.74	0.99						2.34	1.57	2.38	0.83
	1.32	1.37	1.88	0.74						1.33	0.81	1.36	1.11						1.83	0.8	1.45	0.81						1.42	1.98	1.56	1.29						2.18	1.54	1.72	0.85						1.56	0.28	2.74	1
	1.36	0.58	1.37	0.82						1.34	0.53	1.33	0.78						1.25	1.96	1.38	0.78						1.96	1.3	1.42	1.24						2.17	1.31	2.41	0.99						2.76	0.5	1.92	1.3
	1.52	0.64	1.84	0.76						1.67	0.3	2.16	0.91						1.69	0.59	1.29	1.5						1.63	0.34	2.14	1.02						1.52	0.92	1.66	0.75						2.46	1.21	2.27	0.82
	1.31	1.38	2.13	0.57						2.46	0.65	1.3	1.13						1.92	0.54	1.25	0.69						1.9	0.22	1.29	0.69						1.58	0.17	2.11	1.58						2.03	1.15	2.63	0.8
	1.06	0.85	1.73	1.03						1.86	0.16	1.06	0.81						1.74	0.1	1.7	1.55						1.78	1.31	2.15	0.84						2.03	1.73	2.68	1.27						1.66	1.2	1.91	1.22
	1.56	1.35	1.72	1.56						1.15	1.31	1.27	0.84						1.33	0.76	1.79	1.66						0.71	3.42	1.2	1.06						1.11	1.05	1.59	0.7						2.2	0.73	1.72	0.45
	1.86	0.35	1.38	0.43						1.35	1.29	1.85	0.86						1.3	1.47	1.67	1.39						1.41	1.29	1.34	0.67						2.82	0.49	1.73	0.69						1.86	1.07	2.25	1.35
	1.53	1.11	1.38	0.96						1.31	0.74	1.63	1.03						2.02	1.81	1.45	0.87						1.43	0.62	1.41	1.03						2.71	0.26	1.43	0.89						2.12	0.27	1.61	1.59
	1.42	1.08	1.74	1.28						1.01	0.79	1.98	1.07						2.28	0.84	2.33	0.05						1.06	1.35	2.12	1.87						1.71	0.25	1.47	0.66						1.82	2.42	1.82	0.98
	1.07	1.27	1.48	1.11						3.74	1.33	1.06	0.98						1.31	0.77	2.2	1.09						1.58	0.58	1.33	0.48						1.73	0.59	1.37	1.04						1.39	1.85	2.06	0.63
	2.15	0.93	2.1	0.86						1.83	0.31	2.45	0.95						2.07	1.01	1.96	0.97						1.23	0.38	2.14	0.91						2.06	1.53	1.4	1.09						2.12	1.12	1.22	1.14
	1.51	1.15	2.15	1.1						1.55	0.43	3.87	0.93						1.62	0.34	1.92	0.57						1.24	0.9	1.15	0.56						1.58	0.27	1.68	1.04						1.54	0.94	3.04	1.43
	1.72	0.84	1.19	1.16						1.69	0.58	3.32	1.22						1.49	0.73	2.38	1.22						2.33	0.63	1.65	1.19						1.28	0.83	1.79	1.01						2.63	1.42	1.59	1.57
	3.8	0.82	2.43	1.12						1.6	0.67	1.77	1.01						1.24	2.09	2.01	1.38						1.61	1.64	1.44	0.68						1.77	1.62	2.25	0.65						2.45	1.29	1.82	0.92
	1.45	1.94	1.59	1.1						1.67	0.73	1.65	1.35						1.83	0.74	1.96	1.04						2.51	1.44	1.54	1.34						1.4	1.33	1.66	1.53						1.88	0.47	1.83	1.19
	2.34	1.08	1.46	1.1						1.61	2.22	2.93	0.86						2.44	1	1.97	0.88						1.41	0.24	2.01	0.74						1.7	1.32	2.09	1.34						1.88	1.14	3.11	1.06
	1.53	0.73	1.96	1.05						1.32	1.72	1.32	1.12						1.95	0.27	1.3	0.77						1.66	1.38	2.93	1.06						1.42	0.8	2.32	0.99						1.56	0.23	1.95	1.21
	1.67	1.39	2.05	0.59						1.88	0.47	1.9	0.88						2.32	0.93	1.74	1.45						1.47	1.56	2.13	0.78						2.34	1.44	2.75	1.42						3.17	0.82	2.3	1.28
	1.11	0.67	2	0.6						1.58	0.89	1.4	0.72						1.92	0.77	1.4	2.36						4.35	1.04	1.75	1.48						1.78	0.93	2.43	1.1						1.47	0.38	1.65	1.12
	1.32	1.48	1.15	1.61						1.27	0.89	1.31	0.91						1.54	0.32	0.95	0.78						2.1	1.29	2.23	1.04						2.02	0.82	2.38	1.09						1.73	1.53	2.3	0.37
	1.87	1.37	1.09	0.88						2.39	1.1	1.59	1.19						1.35	1.49	1.76	0.44						1.77	0.25	1.21	1.75						2.62	0.53	2.27	0.96						1.68	1.81	2.26	0.62
	1.24	1.7	1.86	1.13						2.47	1.58	1.27	0.99						2.19	0.22	1.16	0.84						2.11	1.75	2.53	1.32						1.24	0.64	2.56	0.88						2.38	1.22	2.57	0.66
	1.48	1.76	1.28	0.56						1.4	1	2.26	0.95						1.9	0.65	1.79	1						1.1	1.8	2.23	0.98						3.04	0.63	2.1	1.1						1.79	0.5	3.55	1.3
	1.73	0.8	2.62	0.91						1.84	0.46	0.93	0.67						1.31	0.68	1.48	0.72						1.33	1.06	2.81	0.95						1.53	0.82	2.46	1.13						1.45	0.37	2.79	1.28
	2.09	1.18	1.44	0.91						1.78	1.76	1.62	1.16						1.37	1.46	1.43	0.6						2.46	1.39	1.55	1.01						2.05	0.83	2.1	0.61						2.05	1.52	2.3	0.71
	1.9	0.51	2.25	1.7						0.95	2.11	1.35	0.91						1.64	1.41	1.54	1.02						2.17	1.62	1.81	0.7						2.21	1.27	2.3	0.72						1.4	0.22	2.73	0.62
	1.83	1.47	1.26	1.39						1.48	1.17	2.01	1.07						2.28	0.88	2.02	0.77						1.65	0.17	2.05	1.27						2.68	0.88	2.12	0.92						2.46	1.04	2.04	1.17
	1.14	1.45	1.3	0.8						1.42	1.08	1.52	1.18						1.88	0.26	1.49	1						2.9	0.79	1.7	1.72						2.06	1.23	2.01	0.76						2.26	1.46	1.67	1.2
	1.53	0.41	1.53	0.96						2.06	1.06	1.51	1.02						1.73	1.19	1.52	0.96						2.27	2.05	2.23	0.86						2.37	0.8	1.79	0.56						2.41	1.06	2.96	1.02
	1.62	0.77	1.73	1.32						1.92	0.2	2.34	0.81						2.15	1.87	1.62	0.76						1.84	0.76	1.05	0.76						1.27	0.41	2.23	1.23						1.77	1.01	1.65	1.45
	1.5	0.75	1.74	1.26						1.4	0.82	1.63	1.04						1.91	1.2	2.69	0.84						1.3	0.55	1.77	1.22						2.15	1.44	1.98	0.71						1.47	1.28	1.88	1.34
	2.14	0.72	1.6	1.23						2.04	1.38	1.18	0.74						1.51	0.77	1.42	0.92						1.13	1.26	1.5	1.09						2.33	1.01	2.2	1.24						3.6	0.3	2.18	0.88
	3.46	0.46	1.82	0.92						1.23	1.8	1.34	1.41						1.88	1.39	1.47	0.85						2.65	0.55	1.82	1.12						1.74	1.24	2.47	0.8						1.97	1.31	2.87	0.8
	1.65	1.51	1.38	0.73						1.92	0.25	1.02	1.72						1.89	0.18	1.59	0.61						1.83	2.3	1.69	0.63						1.2	1.33	2.45	0.69						1.79	1.24	2.93	0.72
	1.08	0.54	2.54	0.71						1.1	0.66	1.9	0.88						1.46	1.47	1.66	1.02						1.87	1.36	1.83	0.97						1.55	0.19	2.2	0.8						1.66	0.18	3.51	1.33
	1.51	1.68	1.09	0.99						1.46	1.18	1.43	1.51						1.52	1.12	2.69	0.75						1.56	1.78	0.89	0.94						1.53	0.63	2	1.26						1.47	0.45	1.86	0.84
	1.33	2.14	1.95	1.59						1.24	0.93	1.36	0.61						2.45	1.42	2.19	1.36						1.69	1.43	2.21	0.8						1.73	1.06	1.83	0.98						2.08	1.76	1.62	1.19
	1.35	0.75	1.33	0.95						1.2	0.79	1.15	0.56						1.18	0.88	1.37	1.23						1.49	0.65	1.82	1.22						2.29	1.07	2.22	1.14						1.6	0.3	2.24	0.65
	1.78	0.39	1.78	0.74						1.68	0.22	1.67	0.84						3.35	1.98	1.17	1.17						1.87	1.91	2	1.83						1.73	1.5	1.99	1.07						1.74	0.56	2.02	0.8
	2.21	0.83	1.01	0.97						2.19	0.2	1.21	0.26						1.84	1.06	1.69	1.17						1.59	2.32	1.8	1.72						1.56	0.54	1.16	1.46						2.33	1.11	1.6	0.61
	1.49	1.68	1.77	1.16						2.4	2.1	1.56	0.79						1.66	0.18	1.92	0.74						1.58	1.33	1.57	0.57						3.18	0.65	1.79	0.59						1.58	0.36	2.3	1.04
	2.78	1.29	1.32	0.62						1.39	1.64	1.75	1.09						1.48	1.28	1.72	1.3						2.17	1.3	2.2	1						1.98	2.33	1.34	0.69						2.66	0.99	2.04	2.36
	2.12	0.18	1.38	0.63						3.58	0.57	1.75	1.11						1.33	1.67	1.52	1.05						1.2	1.02	1.5	1						2.05	1.16	1.65	0.49						2.57	2.06	1.6	0.24
	1.91	0.97	1.56	2.04						1.73	1.46	1.44	1.05						1.16	1.26	1.78	1.35						1.58	0.34	1.07	0.48						1.69	1.62	2.73	0.99						2.48	1.73	1.9	0.91
	1.49	0.27	1.46	0.61						1.81	1.06	1.93	1.06						1.21	0.77	1.48	0.91						1.68	0.63	1.77	1.19						2.22	1.34	2.31	0.94						2.87	0.67	2.27	1.29
	1.49	0.77	1.68	0.89						1.36	2.13	1.55	0.98						0.93	1.38	1.29	0.57						1.7	0.18	2.27	0.7						2.87	0.07	2.48	1.16						1.73	0.28	1.71	1.03
	1.57	0.77	1.51	1.08						1.52	1.38	1.46	1.34						1.01	1.51	2.78	1.1						1.41	1.07	2.42	1.32						2.65	1.34	1.47	1						1.24	0.79	1.85	0.74
	1.96	1.32	1.26	1.09						1.84	0.26	1.8	0.73						0.93	1.17	1.56	1.27						1.38	0.37	1.73	1.14						2.24	1.02	2	0.48						1.71	0.32	3.72	0.77
	1.18	0.86	2.09	1.59						1.89	0.57	1.75	1.02						1.88	0.45	2.17	1.09						1.64	0.29	1.45	1.15						1.61	0.55	1.45	0.76						1.78	1.45	1.84	0.83
	1.6	1.65	1.8	1						1.67	1.18	1.76	1.17						1.19	0.82	1.82	1.17						1.29	0.21	1.88	1.11						1.69	1.84	2.13	0.69						1.67	1.08	2.05	0.8
	1.98	0.52	1.83	1.18						1.35	1.12	2.57	1.07						1.2	1.27	1.82	1.02						2.29	0.98	1.11	1.43						2.33	0.75	1.86	0.73						2.83	0.43	3.07	1.59
	1.72	0.32	1.43	0.69						1.36	0.83	1.63	0.7						1.87	0.91	2	0.94						1.99	1.62	1.96	1.06						1.47	0.49	1.57	1.38						1.86	0.48	3.19	1.22
	2.41	1.21	2.97	1.57						1.34	1.7	1.81	1.22						1.35	0.81	1.78	0.63						1.42	1.08	2.21	1.08						2.39	0.89	1.49	0.6						1.99	0.18	1.54	0.67
	1.55	1.22	1.37	0.64						1.33	1.72	1.15	0.64						1.77	0.25	1.28	0.98						1.97	1.13	1.87	0.86						1.79	1.46	2.26	1.09						1.74	1.88	1.54	0.97
	1.7	0.59	2.59	0.85						1.35	2.54	2.38	1.02						1.66	0.41	1.67	1.26						1.69	1.68	2.21	0.77						1.61	0.13	1.67	0.95						2.43	2.23	2.67	1.6
	1.25	1.33	1.88	1.86						2.11	1	1.74	0.85						4.37	1.08	2.11	0.91						1.39	0.76	1.41	1.03						2.34	1.06	1.94	1.29						1.99	1.05	1.87	0.84
	1.27	1.37	1.6	0.68						2.02	1.27	1.05	0.36						1.72	0.35	1.88	0.81						1.97	1.45	1.39	1.15						2.54	0.48	1.31	0.66						2.82	0.6	2.7	0.96
	1.08	14.09	1.51	0.53						1.06	1.8	1.35	0.86						1.96	1.02	1.41	1.01						1.46	1.31	2.43	0.95						2.15	1.69	1.43	1.19						2.34	0.28	2.53	0.8
	2.04	0.56	1.56	1.44						1.3	1.39	1.33	0.93						1.47	1.18	2.13	0.88						2.4	1.17	1.81	0.76						1.49	0.55	1.6	1.28						2.61	1.78	2.34	1.35
	2.01	1.02	1.44	1						2.33	1.2	1.7	1.08						1.14	1.74	1.72	1.13						1.62	0.47	2.41	0.81						1.88	1.27	1.49	1.26						2	1.21	2.08	0.8
	1.77	1.26	1.81	1.53						1.49	0.97	1.43	0.97						1.14	1.47	2.32	1.12						1.42	1.01	1.35	0.71						1.58	0.57	1.77	1.65						3.2	0.26	2.02	0.54
	1.27	1.46	1.66	1.11						1.71	1.37	1.43	0.7						2.67	1.45	2.41	1.11						1.85	0.97	1.85	0.79						1.41	1.01	2.45	1.58						2.78	0.98	1.72	1.06
	1.75	0.7	1.3	0.68						1.62	1.03	1.73	0.71						1.95	1.07	1.82	1.85						2.23	1.05	1.96	1.02						1.45	0.16	2.22	1.07						1.87	0.35	1.83	0.7
	2.08	0.34	1.7	1.19						1.58	0.3	1.29	1.07						1.44	0.85	2.03	1.04						1.62	0.27	1.5	0.8						1.43	0.72	1.43	1.07						2.3	1.21	1.84	1.87
	1.53	1.5	1.5	0.78						1.02	1.73	1.33	0.71						1.17	1.53	2.22	0.81						1.63	0.51	1.91	1.45						2.05	1.65	1.93	1.09						1.68	0.4	1.79	0.74
	1.61	2.13	2.18	0.86						1.07	0.18	1.44	0.82						1.6	0.6	2.34	0.86						2.89	1.1	1.27	0.95						2.22	1.13	1.39	1.32						2.02	1.89	2.74	0.72
	1.82	1.4	1.84	0.68						1.81	0.59	1.82	1.15						1.65	1.86	1.68	1.25						2	1.6	1.43	0.6						2	1.4	2.4	0.87						2.09	1.22	2.92	1.07
	1.21	1.32	3.43	0.8						1.76	0.62	1.61	1.23						1.7	0.22	2.29	0.84						2	1.43	2.71	1.18						1.29	1.05	1.54	1.03						1.6	1.19	1.93	1.25
	1.67	0.34	2.19	1.04						1.23	1.2	3.1	1.1						2.77	1.01	1.66	0.91						1.29	1.06	1.4	1.52						1.58	0.52	3.05	1.02						2.06	0.73	2.5	1
	1.65	0.82	8.28	2.32						1.95	0.22	1.94	0.72						1.19	2.33	2.69	1.07						1.84	0.18	1.79	0.74						1.88	0.76	1.04	1.23						1.84	1.64	2.4	1.03
	1.88	1.37	4.72	1.16						2.32	1.09	1.9	0.91						2.47	1.33	2.92	1.41						1.48	1.63	2.48	0.96						2.52	0.8	1.94	0.51						3.27	1.55	2.17	0.93
	2.29	1.96	1.04	1.05						1.2	1.25	1.67	0.58						2.15	1.76	1.74	2.06						1.92	1	1.61	1.27						1.77	1.36	1.46	0.51						5.66	1.48	2.98	1.05
	1.61	1.06	1.68	0.94						1.61	0.91	2.41	0.92						1.5	0.78	2.25	0.54						1.57	0.3	2.64	1.11						1.8	1.96	2.44	1.4						1.38	0.58	2.57	0.85
	1.5	1.12	1.74	0.6						1.41	0.5	1.24	0.47						1.64	0.23	2.09	0.68						1.64	0.16	2.42	0.91						1.78	0.83	1.78	1.3						1.88	1.13	2.2	1.32
	2.11	0.99	1.36	0.77						1.8	0.49	2.22	0.84						2.22	0.81	1.27	0.95						2.07	1.4	1.2	1.12						1.47	0.9	2.56	0.98						1.92	0.55	2.61	0.92
	1.86	0.23	1.58	0.57						1.01	0.99	1.92	1.41						2.1	1.64	1.42	0.66						2.41	0.85	2.17	1.11						2.02	1.06	1.1	1.24						1.99	1.8	2.06	0.78
	2	0.72	1.21	0.7						1.64	1.51	1.31	0.79						1.71	0.31	1.4	1						2.25	1.02	2.24	0.56						1.96	1.26	1.68	0.83						1.16	0.54	1.96	0.63
	1.22	1.05	1.18	0.96						2.68	1.12	2.19	0.73						4.06	1.08	2.1	0.7						1.77	0.61	2.13	0.91						2.02	1.03	1.77	1						1.72	0.2	1.17	1.44
	1.75	0.71	1.13	1.36						1.47	1.03	0.99	0.77						1.47	0.64	1.28	0.84						2.09	1.27	2.36	0.91						1.31	0.09	2.04	0.97						1.94	0.13	2.54	1.81
	2.4	1.27	1.86	0.64						1.49	0.36	1.8	1.4						1.36	0.93	3.99	0.87						1.61	0.35	2.81	0.83						2.13	0.17	1.46	1.6						2.76	0.26	1.7	0.78
	1.51	1.15	1.27	1						1.46	0.68	1.33	1.59						1.74	0.24	1.22	1.88						2.84	0.65	2.2	0.44						1.66	0.27	1.83	0.58						2.35	0.59	1.35	0.8
	1.88	0.62	2.44	1.03						1.75	0.95	2.35	0.66						1.59	0.72	2.05	0.79						1.44	0.99	1.67	0.85						1.58	0.51	2.09	1.19						3.47	0.31	1.57	1.89
	1.76	0.23	2	0.69						1.25	0.88	1.54	1						2.7	1.67	1.47	1.36						1.95	0.29	1.74	0.83						1.79	1.76	1.77	1.8						1.92	1.32	1.82	1.1
	1.46	1.13	1.46	1.61						1.61	0.64	1.31	1.56						1.36	1.43	1.62	0.81						1.42	1.65	1.3	0.91						2.42	0.83	1.91	0.93						2.1	0.25	2.96	1.29
	0.96	0.26	1.52	1.09						0.84	2.78	1.43	0.97						1.87	0.2	1.75	0.96						1.82	0.72	1.53	0.73						1.39	0.4	1.76	0.87						2	1.53	2.75	0.54
	1.05	0.45	1.58	0.96						1.57	1.09	1.43	0.83						1.32	1.17	1.7	0.49						1.33	1.41	2.12	0.75						1.63	0.17	1.46	0.83						1.59	0.35	2.49	0.82
	0.92	0.28	1.39	0.98						1.74	0.18	1.84	1.12						1.91	0.35	1.69	1.25						0.95	2.9	2.63	0.71						2.52	1.51	1.96	0.67						2.37	0.89	1.54	0.6
	1.96	0.29	1.2	0.99						1.86	0.39	1.56	0.96						1.65	0.3	1.4	0.99						1.7	0.31	2.08	0.56						1.86	0.89	1.44	0.73						2.16	0.92	2.48	0.51
	1.71	1.1	2.09	0.64						1.58	0.4	2.06	1.2						2.14	0.8	1.38	0.41						1.19	0.81	1.53	0.65						1.63	0.19	2.08	1.19						1.77	0.67	2.72	1.06
	1.18	1.39	1.82	1.09						1.61	0.49	1.57	1.35						1.33	1.07	1.66	1.02						1.09	1.1	1.7	1.08						1.78	1.24	1.88	0.96						1.52	0.6	2.87	1.12
	1.74	0.19	1.45	0.73						1.84	0.8	1.85	1.52						1.91	1.1	1.73	0.82						2	1.82	1.8	1.12						1.76	0.21	1.2	1.02						2.13	0.88	2.1	0.99
	1.75	0.44	2.3	1.03						1.33	1.13	1.4	0.7						1.44	0.5	2.18	0.6						2.93	1.17	1.91	0.47						2.24	1.53	1.89	1.13						2.7	0.93	1.85	1.35
	1.7	1.35	1.72	0.97						1.6	1.3	2.21	1.45						2.01	0.47	2.28	0.96						2.34	1.09	2.16	0.81						2.73	0.19	1.67	0.79						2.38	0.96	2.37	0.69
	2	0.41	1.44	0.71						1.54	0.35	1.19	0.89						1.07	1.25	1.62	1.33						2.84	1.54	1.86	0.7						1.9	1	2.15	1.09						2.49	0.85	2.77	0.99
	1.76	1.44	1.7	1.41						1.19	0.64	1.2	0.31						2.48	1.59	2.73	0.94						2.43	1.54	1.77	1.26						1.85	1.38	1.23	1.11						2.21	1.05	1.89	0.55
	1.56	1.56	1.72	0.83						1.42	1.57	1.31	0.91						2.36	1.48	1.83	1.21						2.96	0.93	1.37	1.03						2.06	0.9	1.64	0.91						3	1.03	2.12	0.77
	2.33	0.56	1.87	0.53						1.18	1.69	1.44	0.52						2.51	1.13	1.3	1.26						1.5	1.19	1.8	1.6						2.13	1.68	2.15	1.16						1.61	0.89	2.32	0.96
	2.07	1.36	1.13	0.62						1.93	0.39	2.03	1.03						2.25	1.74	1.65	1.29						1.64	2.3	1.45	0.74						1.87	0.64	2.36	0.7						2.74	0.47	2.32	0.87
	1.48	1.77	1.76	1.24						1.87	2.26	1.46	2.2						1.32	1.83	1.36	0.85						2.2	1.34	1.63	0.84						1.74	0.97	1.76	1.1						1.52	0.96	1.53	1.16
	1.86	0.41	1.58	0.78						2.56	0.99	1.84	0.81						1.2	1.14	1.96	1.15						1.97	1.46	2.03	0.84						1.84	1.1	1.5	0.75						1.77	0.21	2.59	0.71
	1.68	1.31	1.86	0.83						1.61	1.98	1.91	0.65						1.83	0.96	1.5	0.68						2.41	1.2	1.45	1.14						1.71	0.36	2.54	1.29						1.77	1.42	1.99	0.51
	1.79	0.61	1.21	0.8						1.53	1.24	1.6	1.26						1.54	0.76	1.55	0.98						2.35	1.85	1.4	0.95						1.86	0.66	1.44	0.85						2.6	1.23	2.34	0.88
	1.64	1.81	1.26	0.69						1.7	1.31	1.25	1.01						1.81	0.28	1.84	1.03						2.28	1.49	2.62	0.85						2.35	1.41	1.67	1.29						1.58	0.29	1.58	1.13
	1.86	1.04	1.75	1.43						1.43	1.74	1.42	1.76						1.33	2.18	1.36	1.17						1.97	1.16	1.46	0.66						4.07	1.43	2.16	0.83						3.26	0.68	2.28	1.12
	2.08	0.79	0.9	0.86						2.33	0.88	1.42	0.86						1.86	0.26	2.13	1.08						1.64	3.01	1.97	0.73						2.32	1.11	1.52	1.22						2.12	1.13	1.89	1.31
	1.68	1.16	1.83	1.39						1.3	0.69	1.67	1.01						1.84	1.02	1.34	0.92						2.22	1.3	3.07	1.41						2.33	1.03	2.66	0.84						2.1	0.48	3.39	0.74
	2.11	1.48	1.54	1.3						1.48	0.92	1.21	0.84						1.12	1.27	2.46	1.07						1.54	0.32	1.55	1.72						1.81	1.19	2.41	0.78						1.54	0.23	2.38	0.55
	1.72	1.12	1.42	0.88						2.17	0.48	1.24	1.73						1.58	0.29	2.02	1.04						1.8	1.8	2.09	0.97						2.12	0.69	2.34	0.62						1.72	0.72	2.3	1.04
	2.5	1.19	1.58	0.95						1.63	1.08	2.29	0.84						1.4	0.86	0.94	0.52						1.72	1.58	1.56	1.2						1.88	1.37	2.03	1.45						3.02	0.68	1.68	1.12
	1.78	0.36	1.64	0.98						1.64	0.37	3.16	1.13						1.94	0.48	2.32	1.47						2.25	1.41	1.99	0.83						2.22	1.2	2.39	0.8						1.91	0.22	1.61	0.72
	2.01	0.34	1.33	0.81						2.31	1.32	1.43	1.68						1.37	1.1	1.87	1.04						1.75	0.24	2.39	0.68						1.76	0.57	1.94	1.08						2.81	0.8	1.79	1
	1.82	0.84	1.78	1.53						1.03	2.44	1.66	0.97						1.8	1.21	1.57	1.38						2.25	1.33	1.38	0.59						2.69	0.66	2.04	1.27						1.69	1.85	1.67	0.9
	1.55	2.41	2.09	1.02						1.73	1.11	1.97	0.83						1.46	0.6	1.77	1.75						1.99	0.67	1.57	1.48						2.44	1.54	1.72	1.39						1.89	0.61	2	0.98
	1.68	0.37	1.46	0.73						1.47	1.52	1.59	1.02						1.33	0.9	1.24	1.22						1.9	0.29	1.42	1.14						2.14	1.41	2.51	1.09						1.99	0.6	2.69	1.02
	1.77	0.67	2.22	0.71						1.51	1.01	1.86	1.13						1.35	0.28	1.04	1.06						2.42	0.92	1.14	0.8						2.12	0.79	1.39	1.19						1.83	0.62	1.86	1.5
	1.9	1.14	1.32	1						2.01	0.25	1.9	1.42						1.16	1.25	2.04	1.4						1.35	0.49	3.03	0.81						1.43	0.24	1.27	0.74						1.64	0.99	2.9	0.67
	1.67	1	2.41	0.64						1.8	0.27	1.22	0.89						1.17	0.39	1.63	1.52						1.81	0.76	1.87	0.8						2.24	1.29	1.55	1.46						3.15	1.33	2.21	0.67
	2.02	0.43	1.01	0.82						1.19	1.19	1.44	1.08						1.59	0.73	1.62	1.48						2.59	0.24	1.77	0.87						1.47	0.4	2.33	1						1.68	1.69	2.8	1
	1.54	0.34	0.95	0.69						1.53	0.67	1.98	1.42						1.2	1.21	1.89	0.9						1.51	0.36	1.64	0.78						2.21	1.04	2.08	0.87						1.34	0.31	1.71	0.69
	2.12	0.54	1.91	1.24						1.35	0.71	1.46	1.2						1.77	0.28	1.6	0.49						1.22	1.71	1.6	1.4						1.22	0.7	1.81	0.85						2.31	0.89	1.75	1.04
	1.54	1.12	2.34	1.13						2.11	1.07	1.05	1.33						1.99	0.34	1.34	1.63						1.3	0.71	1.91	1.03						2.12	0.54	2.23	0.87						1.38	0.25	1.79	1.15
	1.69	0.4	1.43	0.87						1.19	1.73	1.09	0.96						1.22	1.14	1.65	0.67						1.01	0.18	1.44	0.41						1.75	0.35	2.15	0.73						2.56	1.57	2.16	0.72
	1.67	0.66	1.26	1.14						0.97	1.05	1.27	0.51						2.02	1.18	1.7	1.3						2.02	1.27	1.6	0.83						1.85	1.13	1.6	0.35						1.81	2.22	2.35	1.42
	2.06	1.01	1.26	0.39						1.6	1.11	1.5	0.94						1.5	2.89	1.87	1.05						1.34	0.72	2.4	0.75						1.28	0.26	1.38	0.57						2	1.16	2.61	1.04
	1.06	1.16	1.48	0.9						1	0.4	1.61	1.32						1.32	0.51	1.13	0.68						1.95	1.45	1.91	0.9						2.23	1.21	1.51	0.36						1.94	1.08	2.6	1.19
	2	0.72	1.6	1.13						1.7	0.44	1.84	1.54						1.6	0.5	1.7	1.01						2.08	1	1.36	1.26						2.69	0.67	1.37	0.78						2.49	1.09	2.74	1.09
	1.73	1.11	1.98	1.14						1.9	0.94	1.13	1.35						1.99	0.79	1.34	0.83						1.4	0.72	2.26	1.24						2.12	1.34	1.29	1						2.06	1.58	2.28	0.96
	1.37	1.57	1.74	0.7						1.72	0.29	1.53	0.93						1	1.86	1.02	0.54						4.17	1.35	1.4	0.78						1.38	1.4	2.8	1.34						1.72	0.29	2.47	0.9
	1.6	1.27	1.83	1.28						1.47	0.9	1.23	0.85						2.29	0.68	2	0.42						2.15	1.06	1.85	0.66						1.44	0.31	1.66	0.88						2.49	1.44	3.18	1.11
	1.36	0.91	2.49	0.8						1	1.23	1.61	0.81						1.21	0.5	1.4	1.46						2.26	0.93	1.82	1.1						2.33	0.64	1.47	0.54						1.79	1.39	2.27	1.31
	1.32	1.6	1.02	0.53						1.57	0.63	1.57	1.27						2.16	0.74	1.37	1.24						1.88	1.42	1.49	1.3						1.62	1.27	2.12	0.63						1.94	1.13	2.54	1.04
	1.42	0.84	1.28	1.31						1.04	1.08	1.47	0.75						2.08	1.47	1.4	0.89						1.42	0.19	2.1	1.26						2.96	0.21	1.3	0.94						2.72	0.4	2.58	1.64
	1.54	0.93	1.28	0.38						2.27	1.43	1.5	1.12						1.73	0.19	2.41	0.93						2.47	0.99	1.87	1.1						2.12	1.25	2.22	1.14						2.89	0.34	2.7	1.6
	2.04	1.15	2.36	1.09						1.6	1.95	1.38	1.27						1.08	1.5	1.57	0.78						1.19	1.17	2.2	1.25						1.33	1.08	1.17	1.08						1.97	1.18	2.06	1.32
	1.4	0.53	1.73	0.97						1.06	1.2	1.56	1.26						1.82	0.22	1.62	1.05						1.5	0.51	2.4	1.73						2.48	1.16	2.43	0.82						3.22	0.3	1.73	0.74
	1.75	0.83	1.44	1.24						1.49	0.71	1.81	1.27						1.45	1.08	1.62	0.86						1.63	1.5	1.97	0.8						1.89	1.46	2.58	1.18						1.67	0.97	2.07	0.95
	1.38	1.5	1.94	1.29						1.28	1.72	1.28	1						1.35	1.13	1.66	1.33						1.07	0.65	2.28	0.07						2.36	1.21	1.3	1						2.31	1.35	1.38	1.16
	1.02	1.48	2.01	1.22						1.51	1.11	1.62	0.72						1.41	0.62	1.53	0.84						1.67	0.19	1.47	0.95						1.96	1.13	1.69	1.23						2.98	0.83	1.31	0.52
	1.58	0.83	2.33	0.71						1.7	1.49	2.12	1.62						1.91	0.49	1.71	0.83						1.52	0.36	1.57	2.3						2.17	1.72	1.62	0.96						2.95	0.89	2.47	1.08
	1.91	0.71	1.47	0.89						1.37	0.96	1.85	0.94						1.64	1.12	2.49	0.52						2.53	0.97	1.76	0.93						1.17	1.29	1.91	1.05						1.96	0.26	3.18	1.15
	1.47	1.81	1.77	1.01						1.54	1.42	1.62	0.8						1.66	1.48	2.46	0.82						2.01	0.97	1.39	1.13						1.41	1.11	2.83	1.26						1.89	1.73	1.9	1.06
	2.4	0.77	1.96	1.26						1.25	1.8	1.86	1.02						1.7	0.39	1.56	0.32						1.97	1.06	1.77	0.6						2.2	0.57	2.11	0.76						2.02	1.51	1.34	0.98
	1.45	1.51	2.04	0.93						2.53	0.94	1.55	0.79						1.34	1.09	2.22	0.66						1.11	0.81	1.65	1.11						1.63	0.12	2.18	0.7						1.88	0.7	2.98	1.74
	1.18	1	1.16	0.59						1.69	0.31	1.81	1.11						1	1.13	1.49	0.82						1.5	0.76	1.8	1.01						2.48	0.59	2.25	0.9						2.64	0.23	1.44	0.89
	2.04	1.36	1.27	1						1.98	0.37	1.39	1.39						1.61	1.72	1.65	0.56						1.31	0.48	2.94	1.31						2.56	1.22	1.75	0.69						3.05	0.53	2.22	1.72
	1.42	1.13	1.17	1.68						2.12	0.08	1.44	0.49						1.44	1.71	1.8	0.94						1.35	0.56	3.68	1.17						1.89	1.02	1.48	1.01						1.59	0.17	1.88	1.07
	1.19	1.09	1.92	1.36						1.56	0.37	1.99	1.78						2.02	0.34	1.39	1.01						3.02	0.23	2.7	1.31						2.56	0.86	2.61	0.9						1.44	0.5	2.69	0.6
	1.39	0.83	1.55	1.08						1.25	0.63	1.52	0.76						2.2	1.08	1.33	1.09						1.48	1.29	2.02	0.6						2.58	0.21	1.31	0.4						1.44	0.81	1.73	1.06
	1.61	1.5	1.87	1.17						3.68	4.77	1.97	1.07						1.61	0.84	1.6	0.62						1.54	0.54	2.36	0.84						1.7	0.41	1.97	1.2						1.88	1	3.05	0.95
	0.9	0.62	1.16	0.65						1.56	1.27	1.58	1.29						1.74	0.86	3.91	1.45						2.26	1.1	1.96	0.53						2.68	0.52	2.47	1.34						2.51	1.06	2.56	0.94
	1.16	1.53	1.03	0.82						1.36	1.39	1.69	1.51						1.4	0.86	2.85	1.26						1.31	1.17	1.52	0.82						2.4	1.03	6.02	7.6						1.6	0.92	2.14	0.68
	2.06	0.46	2.33	0.58						1.39	0.77	1.97	1.09						1.66	0.2	2.09	0.9						1.8	1.49	1.64	0.8						1.62	0.84	2.42	0.92						1.98	1.16	1.89	0.26
	1.83	0.5	1.47	1.01						1.62	0.65	1.11	0.45						2	1.47	1.41	1.32						1.78	0.76	2.77	0.66						2.14	1.33	2.48	1.46						1.48	0.28	2.36	0.82
	1.53	1	1.18	0.81						1.36	0.99	1.14	0.74						1.54	1.73	1.45	1.06						2.31	1.29	1.77	0.59						1.66	0.98	3.52	0.87						3.06	0.39	2.02	0.87
	1.86	0.18	1.35	0.46						1.44	2.02	1.82	0.91						1.85	0.19	1.41	1.26						1.54	0.53	2.03	0.89						2.14	1.23	1.32	1.14						1.93	0.44	2.03	1.22
	1.59	0.97	2.07	1.2						2.22	1.14	2.12	0.96						1.96	1.1	1.2	0.41						2.35	1.27	2.55	0.76						1.31	0.2	1.81	0.85						1.15	0.97	2.06	0.83
	1.15	1.39	1.68	1.35						1.9	0.33	2.04	1						1.29	0.68	1.53	1.99						1.13	1.79	2.27	0.84						2.58	0.24	1.56	1.21						1.71	1.26	1.57	1.17
	2.56	1.33	1.48	1.22						1.58	1.36	1.08	1.36						1.96	0.55	1.4	1.42						2.19	1.51	1.91	0.73						4.16	1.74	2.22	1.59						2.6	0.72	1.46	1.44
	1.19	0.25	1.84	0.82						1.71	1.11	1.94	0.75						1.25	1.44	2.15	1.2						1.16	0.91	1.49	1.19						5.17	4.81	1.95	1.06						1.63	1	2.45	1.08
	1.48	1.65	1.03	0.91						1.53	1.45	1.78	1.37						1.77	0.1	1.75	0.9						1.25	1.89	2.56	0.91						2.07	1.57	1.92	1.54						1.6	0.16	3.55	0.93
	1.96	0.69	1.64	1.06						1.72	1.85	1.82	0.56						1.39	1.61	1.99	0.92						1.35	0.23	2.21	0.7						1.67	0.57	1.7	1.79						2.13	0.34	2.72	0.72
	1.63	0.63	1.57	1.08						1.64	1.83	1.89	0.89						1.69	0.2	1.33	0.88						1.12	1.27	2.03	1.02						1.71	0.08	1.94	1.63						3.07	1.17	2.79	1.13
	1.98	0.56	1.57	0.91						1.42	1.15	2.75	0.71						1.58	0.19	1.67	1						1.52	0.26	2.03	0.91						2.76	0.77	2.69	0.85						2.52	1.46	1.96	1.38
	1.29	1.16	2.02	0.97						1.72	0.2	4.34	1.06						1.61	0.5	1.65	0.82						2.7	1.18	2	0.9						1.47	0.91	2.6	0.93						1.65	1.14	2.54	0.7
	2.14	0.72	1.46	0.81						1.17	1.43	2.05	1						1.57	0.21	1.93	1.22						3.2	0.98	1.63	1.22						1.61	0.9	2.6	1.08						1.88	0.23	1.67	0.93
	1.34	0.29	1.35	1.51						2.21	1.26	1.37	1.25						1.5	0.34	1.93	0.96						1.7	1.13	1.43	0.98						2.34	1.29	2.15	0.83						1.38	1.08	2.71	0.81
	1.5	0.56	2.56	1.12						1.56	0.8	2.25	0.8						1.5	0.42	2.19	1.04						1.28	0.23	2.06	0.48						1.78	1.24	2.25	0.65						1.29	0.43	2.04	0.54
	1.67	1.56	1.64	0.99						1.64	0.41	0.96	0.8						1.44	0.95	1.61	1.19						1.44	0.91	2.24	0.89						1.98	1.45	2.09	0.94						1.83	1.29	1.57	0.9
	2.23	1.1	1.22	0.87						2.07	1.2	1.57	1.43						1.83	0.27	1.75	1.13						1.91	1.38	2.17	1.05						1.78	0.83	2.55	1.09						1.54	0.26	1.45	0.86
	1.77	0.62	1.45	1.39						1.53	1.81	1.83	1.04						1.96	0.91	2.11	1.2						2.11	0.83	1.89	1.09						2.68	1.08	2.27	1.19						2.58	1.03	1.99	1.24
	2.32	0.92	2.48	0.77						1.95	0.37	1.45	1.11						1.28	1.42	1.89	0.68						1.88	1.08	1.72	0.86						2.84	0.23	2.91	1.17						2.5	0.93	1.79	1.17
	1.87	1.16	1.62	0.74						1.36	0.86	1.63	1.06						1.27	0.19	1.84	1.41						1.72	0.27	1.61	2						4.06	0.47	1.7	1.41						2.43	0.88	1.28	1.52
	1.38	1.22	1.25	1.76						2.28	0.9	1.58	0.81						1.31	1.01	1.4	1.39						1.86	0.25	2.04	1.05						2.12	1.32	1.67	1.18						1.48	1.24	2.78	1.62
	1.49	0.74	1.55	0.59						2.12	0.34	0.91	0.49						1.41	1.06	1.4	0.75						1.71	0.13	1.03	1.07						2.31	1.22	2.03	0.92						1.8	1.56	3.27	1.15
	1.94	0.97	0.87	1.05						1.43	1.63	1.24	1.06						1.18	0.22	1.59	2.21						1.79	0.88	1.85	0.78						2.39	1.81	1.49	0.76						3.32	0.63	2.77	0.71
	1.41	1.23	1.68	1						1.45	1.78	2.15	0.82						2.52	1.7	1.35	0.77						1.67	0.75	2.46	0.57						1.57	1.06	1.9	0.9						2.68	1.92	1.21	1.02
	1.75	0.83	0.95	0.85						1.76	0.7	1.07	0.77						1.81	0.25	2.79	1.16						2.14	1.15	2.29	0.76						1.94	0.93	1.9	1.22						1.68	0.85	3.55	1.33
	1.7	0.89	2.15	1.03						1.98	1.29	1.51	1.4						1.35	1.34	1.7	1.27						2.19	1.61	2.7	1.3						1.36	0.68	1.69	1.47						2.25	1.48	3.01	0.7
	2.29	1.03	1.63	1.33						1.24	1.29	2.12	0.93						1.49	1.15	1.69	1.43						1.47	0.97	1.65	1.21						1.85	0.86	2.28	1.16						1.54	1.07	1.94	1.16
	1.29	1.03	1.57	0.91						0.83	1.52	1.56	1.07						2.62	0.87	1.53	1.14						1.57	1.46	1.59	0.87						1.96	2.21	1.55	1.07						1.91	1.11	2.54	1.29
	1.7	1.24	1.65	0.96						2.3	1.53	1.54	1.17						1.84	1.2	1.93	1.22						2.23	1.5	1.47	1.32						1.41	2.53	1.85	1.31						2.09	0.82	1.62	1.27
	1.41	1.18	0.97	0.96						2.22	1.45	1.38	0.78						1.52	0.99	1.44	0.5						1.72	0.67	1.52	1.34						2.53	0.88	1.71	0.7						1.51	0.22	2.63	1.18
	1.85	0.78	0.98	0.72						1.36	1.1	1.26	1.1						2.1	1.77	0.98	0.46						1.62	0.14	1.53	1.31						1.7	0.89	2.24	1						1.74	1.07	3.26	1.27
	1.82	1.33	1.2	0.47						1.49	1.07	1.12	1.13						1.47	0.58	1.9	0.54						3.08	0.41	1.43	1.14						1.13	0.59	3.14	0.78						2.69	1	2.19	0.63
	2.19	1.23	1.76	0.9						1.5	1.5	1.95	1.29						1.53	1.54	1.38	1.58						2.79	1.49	1.37	0.64						1.64	1.76	1.14	1.09						2.29	1.17	3.7	0.95
	1.9	0.35	1.31	1.81						1.83	0.32	1.83	0.79						1.43	1.3	1.46	1.05						1.68	1.2	1.96	1.15						1.16	1.03	1.1	0.76						1.01	0.64	2.34	1.38
	1.76	0.83	1.4	0.86						1.12	1.7	1.19	0.72						1.11	0.82	1.87	0.73						2.05	1.55	1.26	1.05						2.01	1.11	2.62	0.76						2.93	0.3	2.36	0.94
	1.18	1.29	2.08	0.59						2.16	1.38	1.58	1.04						1.69	0.37	2.04	0.9						1.47	1.15	1.99	1.09						1.52	1.74	2.26	0.81						2.22	1.51	3.37	1.12
	1.52	0.49	1.19	0.78						2.14	1.27	2.06	0.93						1.85	1.61	1.23	1.06						1.77	0.77	1.93	1.04						1.92	1.12	1.92	1.02						1.68	1.54	2.35	1.38
	1.48	0.93	1.76	1.04						3.9	0.91	1.6	1.05						0.92	1.81	1.49	1.22						1.26	1	1.71	1.17						2.52	1.25	1.65	1.08						2.13	0.44	1.61	1.05
	1.13	1.35	1.31	0.97						2.42	1.71	1.95	1.24						2.06	0.23	1.84	1.14						2.48	1.22	1.94	1.08						2.01	1.02	1.73	1.16						2.86	1.35	3.03	1.41
	1.36	0.89	1.66	1.17						1.57	1.19	1.8	0.87						1.51	1.38	1.62	0.72						2.4	1.35	2.24	0.78						2.71	0.63	1.54	0.85						2.13	1.01	1.24	1.09
	1.22	0.14	1.73	0.4						1.45	1.01	2.2	1.14						2.07	1.72	1.26	1.04						2.12	1.22	1.62	1.52						3.11	0.44	1.78	1						1.63	0.6	1.95	1.07
	1.54	1.21	1.71	0.89						1.37	0.92	1.64	1.15						1.33	2.05	0.9	0.75						1.21	1.52	1.64	0.76						1.75	1.13	1.88	1.37						2.81	0.77	2.93	0.94
	1.43	0.42	1.38	1.09						1.66	0.25	2.12	0.5						1.88	0.78	2.21	1.07						3.01	0.96	3.48	1.02						3.07	0.44	1.93	0.5						2.63	0.23	3.63	1.83
	1.03	2	1.39	0.69						1.63	0.65	1.69	1.23						2.19	1.01	1.56	0.42						1.99	0.21	1.38	1.51						1.73	0.65	1.78	0.79						2.23	1.35	3.21	1.3
	2.16	0.92	1.62	1.2						0.97	1.42	2.51	1.07						1.29	1.5	1.41	0.7						1.64	0.31	1.82	1.09						2.43	0.97	2.57	0.84						2.05	1.23	1.57	2.8
	2.39	1.12	1.91	0.94						1.47	0.48	1.7	0.84						1.19	1.77	1.22	1.21						1.74	0.97	1.6	0.49						1.36	1.13	2.74	1.1						1.93	1.51	2.51	0.99
	1.35	1.1	1.98	0.85						1.88	1.38	2.07	0.77						1.85	0.15	0.93	0.46						2.17	1.1	1.77	1.1						1.31	0.77	2.73	0.69						1.82	1.77	1.84	1.41
	1.07	1.26	0.87	0.87						1.22	1.15	2.08	0.79						1.92	0.2	1.89	0.84						2.04	0.84	1.28	1.39						1.5	0.38	1.88	1.32						2.05	1.99	2.54	1.41
	1.42	2.38	1.43	1.39						1.7	0.85	1.34	0.93						1.9	0.54	1.15	0.88						1.41	0.22	1.27	0.98						1.23	0.56	1.6	1						2.09	1.73	2.71	0.67
	1.52	1.24	2.43	0.96						1.55	1.29	1.02	0.63						1.66	0.3	1.11	1.11						1.28	1.16	1.64	0.91						1.62	1.54	2.04	1.84						1.35	2.51	2.8	1.58
	1.33	1.2	1.1	1.18						1.85	0.28	1.17	0.53						2.48	1.08	1.2	0.98						2.71	0.8	2.08	1.59						1.02	1.41	2.01	1.28						1.31	1.43	1.84	0.91
	1.5	1.07	1.83	0.52						1.76	0.89	1.61	1.19						4.05	0.26	1.93	0.58						2.38	1.08	1.48	1.13						1.95	1.29	2.87	1.18						1.91	0.52	2.7	0.81
	1.5	1.43	1.23	1.09						1.09	0.26	1.44	0.55						1.64	0.95	1.2	0.47						1.83	0.24	2.27	0.74						1.45	1.43	3.06	0.98						2.43	1.24	2.48	1.02
	1.6	0.65	1.13	0.58						2.42	1.2	1.69	1.13						1.54	0.56	1.89	1.23						1.97	0.85	2.22	0.59						1.36	0.9	2.28	1.33						1.9	1.62	3.35	1.03
	1.6	1.24	1.32	0.88						1.82	0.64	1.57	1.08						1.29	1.13	1.08	1.1						2.11	1.39	2.84	0.99						1.93	1.08	1.97	0.73						1.79	1.2	2.55	0.81
	1.36	1.36	1.57	1						1.45	1.18	2.06	1.13						1.68	0.18	1.83	0.97						1.35	1.46	2.66	0.57						2.15	1.12	1.24	0.64						1.79	1.35	2.05	1.32
	1.72	0.96	2.5	1.29						1.64	0.3	1.69	1.1						2.24	1.19	2.64	0.9						2.64	1.53	1.73	1.13						2.91	0.65	1.56	0.67						1.87	1.46	1.46	1.46
	1.83	0.99	1.43	0.86						1.22	1.59	1.71	1.69						1.8	0.95	2	0.89						2.16	1.78	1.77	1.15						2.36	0.68	2.23	0.74						1.56	0.79	1.64	1.37
	1.03	0.5	1.3	1.17						1.18	1.41	2.32	0.61						1.44	1.69	1.77	0.81						1.06	0.89	2.58	0.69						2.89	0.2	1.92	1.24						1	0.86	1.94	0.62
	1.04	0.76	1.51	1.15						0.98	1.34	1.17	1.01						1.43	0.24	2.61	0.85						1.72	0.88	1.62	0.98						1.47	0.2	2.16	0.86						1.66	0.35	2.16	1.17
	1.89	0.66	1.34	0.46						1.56	1.45	1.03	0.34						1.73	1	1.97	1.05						2.24	0.76	2.11	0.77						1.11	1.14	2.57	0.83						2.25	0.34	2.75	1.46
	1.9	0.71	1.86	0.99						1.19	1.13	2.08	1.04						1.18	1.23	1.82	1.29						2.13	0.97	1.51	1.22						1.09	1.25	1.36	1.56						2.8	0.43	1.63	0.58
	1.29	0.76	1.83	1.54						1.1	1.43	2.77	1.68						1.53	1.49	1.44	0.84						1.63	1.01	2.82	0.87						1.84	1.58	1.84	1.06						1.75	0.53	2.39	0.83
	1.67	1.06	1.4	1.13						1.27	0.96	0.97	0.92						1.97	1.31	1.96	0.84						2.1	1.31	2.48	0.92						1.23	0.81	2.25	1.04						1.37	1.39	1.55	0.6
	1.55	0.99	1.04	1.07						1	1.23	1.04	0.82						2.39	1.19	1.64	1.37						1.34	0.24	1.9	0.85						2.2	0.91	2.53	0.96						2.03	1.18	1.66	1.85
	1.77	0.94	1.84	1.13						1.46	1.09	1.8	0.87						2.59	1.03	1.33	1.37						2.75	0.94	1.84	1.02						2.3	0.93	2.64	1.12						1.75	1.73	3.05	1.25
	1.6	1.01	1.77	1.63						2.28	1.21	1.39	0.6						1.5	0.53	1.77	0.7						2.27	1.21	3.11	1.09						2.95	0.26	1.69	1.18						1.72	1.48	2.72	1.34
	1.23	0.78	1.22	1.16						1.44	0.84	1.59	0.66						1.97	1.25	1.78	1.1						2.41	1.47	2.24	0.9						1.38	1.14	3.11	0.98						2.16	1.08	1.92	0.77
	2.02	1.01	1.07	1.65						1.65	0.82	1.95	1.12						1.53	0.72	1.28	0.37						1.98	1.51	2.19	0.96						1.64	0.13	1.63	1.25						1.63	0.47	1.46	2.1
	2.07	0.87	1.86	0.97						1.53	1.13	1.26	1.28						1.34	1.82	1.69	1.11						1.43	1.51	2.71	0.84						1.5	0.61	1.38	1.09						1.8	1.4	1.6	1.04
	1.3	1.9	2.15	0.58						2.04	1.01	1.84	1.52						1.62	0.58	1.98	0.81						1.14	0.91	2.3	0.74						2.25	0.63	1.45	0.89						1.93	0.9	2.82	0.89
	2.29	1.4	2.24	1.42						2.01	0.47	2.1	1.06						1.34	0.98	1.22	0.9						2.77	1.2	1.57	0.91						1.27	0.95	2.17	0.68						1.98	1.27	2.49	0.87
	1.28	0.93	2.13	0.82						1.97	0.83	1.4	1.1						2.3	1.59	1.96	0.59						1.34	0.39	2.97	0.78						1.98	1.35	1.83	1.04						2.08	0.59	1.69	1.28
	1.45	0.99	1.77	1.55						1.67	0.69	1.27	1.48						1.23	1.07	1.72	0.74						1.63	1.7	2.47	1.26						1.8	1.15	2.82	0.95						1.99	1.3	2.64	1.31
	1.46	0.93	2.43	1.46						1.37	1.86	1.47	1.43						1.62	0.87	3	1.02						1.82	1.79	2.07	0.54						2.37	1.2	2.04	1						1.42	0.78	1.58	0.81
	1.53	1.08	1.65	1.07						1.37	0.84	1.99	1.08						1.69	0.26	1.67	0.66						2	1.03	2.17	0.93						2.28	2.08	2.05	0.95						2.13	2.83	1.85	0.64
	1.58	1.13	1.52	0.9						1.32	1.07	1.83	1.01						1.31	1.9	1.72	1.1						1.75	1.3	1.4	0.99						1.73	1.08	2.81	0.87						2.31	1.09	1.84	0.64
	1.95	0.69	1.63	1.14						1.96	0.18	1.83	1.01						1.57	0.86	1.68	1.54						1.28	1.25	1.82	1.26						1.73	1.83	1.52	0.97						1.51	1.16	1.76	1.05
	1.41	0.85	1.3	0.51						1.39	1.37	1.49	1.3						1.08	0.38	2.15	0.85						1.75	0.86	1.63	1.5						2.12	2	2.5	0.97						1.87	1.68	2.39	1.57
	1.62	1.13	1.43	0.83						1.65	1.25	2.39	0.94						3.12	1.31	1.22	1.19						2.25	0.81	2.21	0.98						2.64	1.84	1.68	0.54						1.76	0.75	6.68	1.04
	1.12	0.78	1.36	1.54						1.04	0.6	1.3	0.58						2	1.13	1.42	1.5						1.4	0.55	1.98	0.71						1.96	1.39	1.21	0.53						2.09	1.35	2.31	0.95
	1.42	2.42	1.36	0.96						1.87	1.07	1.46	0.73						1.6	0.66	1.83	1.11						2.51	0.33	1.77	0.72						2.2	1.2	2.54	1.13						1.78	0.29	2.26	1.02
	1.96	0.45	2.04	1.44						1.62	2.49	1.68	0.86						1.8	0.44	1.6	1.18						0.93	0.75	1.69	1.59						1.95	0.56	2.17	0.9						2.22	0.84	1.61	1.29
	1.31	1.06	2.42	0.79						1.48	0.89	1.58	1.22						2.61	1.45	1.8	0.83						1.45	1.18	2.71	1.17						1.32	0.25	2.44	0.55						1.91	1.3	2.41	0.65
	1.82	0.64	2.05	0.67						1.75	1.72	1.4	1.02						1.67	0.17	1.28	0.81						1.52	0.82	1.47	1.25						2.12	1.07	1.16	1.07						1.79	0.75	2.69	1
	1.57	1.07	1.49	1.14						1.49	1.09	5.28	1.02						2.56	1.36	1.35	1.5						2.82	0.9	2.8	1.15						1.92	1.06	1.98	1.14						1.44	0.91	2.26	0.8
	1.68	1.52	1.47	0.84						2.01	1.27	1.62	0.95						2.41	1.41	1.7	1.02						2.21	1.12	1.86	1.33						1.44	0.41	1.74	0.49						4.09	1.58	1.98	1.04
	1.47	1.14	1.4	1.08						1.32	1.34	1.26	0.9						1.33	0.36	1.5	0.69						2.54	1.33	1.74	0.71						2.21	1.28	2.82	0.94						3.6	0.81	2.93	0.92
	1.51	1.47	2.23	1.2						1.97	0.2	1.47	0.99						1.39	0.74	1.91	0.98						1.32	0.73	2.55	0.69						1.09	0.53	2.48	0.64						6.26	0.68	1.71	1.19
	1.91	0.39	2.62	1.23						1.61	0.99	1.09	0.39						1.5	1.46	2.01	0.74						1.86	2.05	4.25	1.36						1.95	1.05	2.58	0.64						2.48	0.83	1.57	1.12
	1.8	0.8	2.03	1.21						1.34	2.17	2.04	0.66						2.01	0.55	1.21	0.82						2.3	2.12	2.14	1.05						2.81	0.59	1.73	0.66						2.96	0.93	2.69	0.92
	1.32	0.67	2.28	1.59						0.92	0.74	1.63	1.06						1.5	1.56	1.38	0.63						1.39	0.12	2.72	0.97						1.67	1.58	2.44	1.02						1.76	0.35	2.24	0.44
	1.68	1.54	1.05	1.86						2.19	1.28	2.11	1.12						1.77	0.59	1.68	1.62						1.65	1.01	2.15	0.94						1.91	1.04	2.05	0.64						1.58	0.87	2.33	0.77
	2.2	0.29	1.84	1.4						1.55	1.16	1.73	1.22						1.75	0.47	1.49	1.25						1.44	0.35	2.01	0.54						1.79	0.54	2.71	1.14						3.01	0.06	2.38	1.55
	2.43	0.56	1.99	1.11						1.19	1.09	1.69	0.8						1.34	1.15	1.34	0.67						1.07	0.93	1.61	0.89						1.31	0.99	2.49	0.82						2.01	0.95	3.65	1.1
	1.52	1.1	1.56	0.94						1.38	0.69	1.02	0.59						1.41	1.46	2.52	0.99						1.22	2.12	2.21	0.98						2.18	1.07	1.55	0.9						1.71	0.58	3.2	0.74
	3.35	1.11	1.7	0.97						1.74	1.04	1.18	1.31						1.37	1.13	1.89	1.31						2.68	0.75	1.87	0.8						2.27	0.77	1.72	1.34						2.52	0.76	2.21	0.59
	2.2	0.35	2.31	1.8						1.82	1.26	1.56	1.19						1.28	1.48	2.06	0.81						2.23	1.22	3.68	0.63						2.98	1.19	1.44	0.72						1.97	0.87	1.63	0.37
	2.07	0.25	1.9	1.31						1.71	0.5	2.68	0.99						2.04	0.82	2.29	1.01						1.51	0.52	1.53	0.72						1.86	1.23	1.83	1.14						2.57	0.8	1.93	0.69
	1.94	0.23	1.38	1.02						0.97	2.42	1.77	1.35						1.58	0.51	2.67	0.64						1.55	0.23	2.06	0.67						1.78	1.36	2.11	1.04						2.18	0.53	2.09	0.68
	1.27	1.92	1.61	1.38						1.44	0.74	1.68	0.81						1.25	1.37	2.14	0.86						1.93	1.65	2.68	0.86						2.85	0.52	2.48	1.47						2.46	0.57	3.23	0.61
	1.08	1.02	1.22	0.71						2.01	1.54	2.16	0.96						2.02	0.27	1.89	0.92						1.24	0.81	2.11	0.64						2.79	1.35	1.98	2.32						1.92	1.82	2.47	1.5
	1.81	0.23	1.68	0.97						1.97	0.49	1.3	0.79						1.33	1.11	1.22	1.52						1.19	0.92	1.45	0.63						1.91	1.04	2.08	1.08						1.14	2.08	2.64	1.35
	1.75	1.33	1.82	1.7						1.21	1.28	1.89	1.77						3.61	1.27	2.31	0.64						1.77	2.2	2.95	1.34						2.12	1.25	2.15	1.05						1.17	0.69	1.64	1.47
	1.65	0.8	1.51	1.54						0.76	1.25	2.15	0.6						2.44	1.7	1.48	1.15						1.48	0.25	1.48	1.35						1.82	1.04	2.13	0.68						1.96	0.25	2.38	1.48
	1.56	1.03	1.88	1.01						4.65	1.15	1.55	0.86						1.52	0.29	1.62	0.77						2.31	1.63	2.41	0.76						2.25	1.7	1.8	1.11						1.44	1.47	2.63	0.88
	5.36	0.67	1.82	1.33						1.29	1.52	1.33	1.49						1.38	0.86	2.05	0.71						1.25	0.26	1.37	1.34						1.38	1.29	2.1	0.69						1.83	0.8	1.75	1.05
	1.03	1.35	7.06	3.95						3.34	1.18	1.6	0.93						1.47	1.09	1.53	0.95						1.89	0.77	2.12	1.2						1.27	0.72	1.97	0.79						1.77	0.3	2.53	1.35
	1.24	1.54	1.92	0.74						1.79	0.5	1.89	0.63						1.54	0.44	1.35	0.88						2.69	0.73	1.07	0.58						2.93	0.69	2.29	0.81						1.92	1.13	2	1.13
	1.58	0.24	4.43	1						1.15	1.24	1.63	1.25						2.09	1.53	1.36	0.69						1.42	0.95	1.61	1.09						1.82	1.42	1.87	1.24						1.58	0.41	1.63	2.24
	1.55	1.04	3.63	1.24						1.57	0.26	1.21	0.9						1.67	0.89	1.69	0.98						1.8	0.85	2.91	0.82						2.11	0.16	1.74	0.84						1.98	0.37	2.26	1.02
	1.02	0.46	2.45	1.15						1.42	1.07	1.49	1.09						1.51	1.15	1.93	0.98						2.11	1	1.33	0.91						1.58	0.75	2.18	0.93						3.61	0.69	1.66	0.96
	1.21	1.94	1.95	1.52						1.06	0.5	1.87	0.91						1.23	1.31	1.27	0.86						2.21	1.3	1.73	0.78						1.47	0.18	1.67	1.32						1.05	0.93	2.02	0.79
	1.57	1.72	1.49	1.4						1.47	1.49	1.55	0.71						2.39	1.68	1.94	1.11						1.67	0.71	2.79	0.62						1.59	1.83	1.58	0.87						1.91	0.89	2.94	0.93
	1.95	0.21	2.4	2.59						1.16	0.74	1.66	0.83						1.71	0.18	2.1	0.97						1.33	0.4	1.65	1.55						2.59	1.46	1.37	0.7						1.56	0.47	2.12	0.91
	2.51	1.43	1.41	0.61						1.76	0.92	1.52	0.94						1.35	1.15	2.08	1.48						1.75	1.06	1.74	1.27						1.16	0.35	1.6	0.74						1.79	0.4	2.54	0.66
	1.58	1.05	2.34	0.69						1.85	0.44	2.29	0.87						1.65	0.36	1.81	0.28						1.29	1.75	3.1	1.15						1.35	0.71	2.36	1.13						1.43	0.51	2.43	1.26
	1.44	1.34	1.37	0.96						1.37	0.44	1.2	0.8						1.75	0.44	2.4	0.95						2.22	1.11	2.14	1.24						1.38	0.13	1.78	0.62						2.19	1.04	2.04	1.01
	1.45	1.21	1.66	1.34						2.06	1.38	1.55	0.69						1.94	1.11	1.57	1.19						2.42	1.19	2.07	1.31						2.06	1.63	1.19	1.35						2.98	0.54	2.45	1.27
	1.32	1.53	1.12	0.92						1.78	0.74	1.24	1.26						1.33	0.99	1.3	0.47						1.26	1.46	2.49	0.62						1.76	1.41	1.45	1.02						2.26	1.02	1.82	0.95
	1.23	1.21	1.54	1.66						1.64	0.9	1.34	1.15						1.21	0.91	1.63	1.22						1.75	1.25	2.33	0.47						1.75	1.24	1.75	0.77						1.2	0.64	2.42	0.84
	1.19	0.93	1.62	1.05						2.21	0.97	1.92	0.64						1.72	0.45	2.18	0.97						1.86	0.2	1.26	0.49						2.19	0.82	1.48	0.44						1.62	1.39	3.08	0.7
	1.13	1.4	2.19	0.76						2.08	1.13	1.63	0.99						1.17	1.2	2.51	0.79						2.05	1.37	2.1	0.93						1.52	0.8	2.54	1.12						1.72	0.59	1.91	0.07
	1.49	0.64	1.96	0.92						1.58	1.47	2.11	0.64						1.55	0.24	1.31	0.66						2.13	1.44	1.53	0.94						1.61	0.38	2.14	1.25						1.52	0.97	2.28	1.19
	1.3	1.52	1.79	0.42						1.23	1.56	1.45	0.76						1.88	0.57	1.13	0.59						1.1	0.88	2.24	0.41						1.19	1.22	1.97	1.6						1.24	1.73	1.66	1.29
	1.59	0.95	2.06	1.17						1.71	0.43	1.76	1.19						1.36	1.08	1.76	1.01						1.43	2.09	1.8	0.76						1.67	1.56	2.02	1.45						2.1	0.28	3.33	1.33
	5.66	1.35	1.37	0.69						1.53	0.34	2.2	0.99						1.17	1.26	1.74	1.01						1.25	0.9	1.79	0.75						1.11	1.35	1.39	1.32						2.12	0.84	1.67	1.17
	1.38	1.57	1.23	1.12						1.41	0.49	2.37	0.84						1.83	0.81	1.5	0.94						1.21	0.33	1.42	0.68						1.59	0.26	2.72	1.38						2.45	1.27	2.03	0.46
	1.16	1.18	2.13	0.88						1.74	0.67	1.53	1.43						2.02	1.12	2.36	1.11						1.91	1.56	2.03	0.8						2.34	0.3	2.09	1.29						2.49	0.44	2.28	0.5
	1.06	0.83	2.9	0.69						1.48	0.71	1.81	1.17						1.41	1.27	2.49	0.85						2.3	1	2.88	0.86						1.42	1.17	1.36	1.27						1.05	2.21	1.25	1.65
	1.57	0.49	1.77	0.69						1.18	0.65	1.83	0.96						1.38	1.18	1.02	0.48						1.81	1.69	1.81	0.59						2.77	0.56	3.17	1.2						2.21	0.76	2.01	0.85
	2.04	1.04	1.33	1.28						1.59	0.19	1.34	0.77						1.67	0.26	1.9	1.55						2.09	1.06	2.14	0.75						2.84	1.18	2.17	0.55						2.13	1.14	3.02	0.84
	1.73	1.32	2.21	0.95						1.76	0.86	1.5	1.47						1.96	1.3	1.57	1.32						1.97	1.15	1.98	0.64						1.19	1.02	2.71	0.97						2.6	0.86	1.92	1.32
	1.55	0.26	1.26	1.12						3.84	0.74	1.17	0.88						2.67	0.94	1.59	1.6						1.45	0.63	3.14	1.09						1.73	0.78	1.82	1.69						2.3	1.42	1.72	0.67
	1.71	0.88	0.89	0.66						1.88	0.44	1.97	1.31						1.51	1.92	1.71	0.89						1.89	0.33	1.96	1.19						2.14	1.24	2.2	1.05						2.45	0.34	2.43	0.64
	2.14	1.38	1.06	1.12						1.33	0.94	1.15	1.01						1.51	0.14	1.41	1.44						1.7	0.45	2.08	0.71						1.28	0.73	1.48	0.69						2.14	1.14	1.92	0.73
	1.39	1.14	1.69	1.02						1.67	0.68	1.71	1.26						2.3	1.4	2.83	1.39						2.05	1.25	1.33	0.96						1.83	1.97	1.21	1.78						1.53	0.67	2.12	1.32
	1.45	1.28	1.84	0.82						1.54	0.71	2.41	1.12						1.88	0.86	1.53	1.6						3.23	0.59	1.05	0.88						1.34	0.84	2.05	1.01						3.06	0.76	2.7	1.43
	1.43	0.89	1.01	1.21						1.37	1.92	1.36	1.2						1.66	0.62	1.34	0.29						1.8	1.45	1.27	1.34						1.84	1.39	2.17	1.48						3	0.52	2.25	1.16
	1.73	0.23	1.77	1.11						1.47	0.74	1.7	0.66						1.97	1.06	2.72	1.23						1.72	0.32	2.12	1.37						1.61	1.14	1.47	0.71						1.43	0.79	1.48	2.12
	1.85	0.39	1.84	0.92						1.66	0.22	1.47	1.88						1.49	1.09	1.56	1.35						1.37	0.27	1.4	1.04						1.82	0.7	1.59	1.16						1.92	1.28	3.03	0.7
	1.28	1.42	1.97	1.02						2	0.53	1.78	0.98						1.56	0.68	1.54	1.03						1.41	1.08	2.43	0.92						1.58	1.2	2.24	2.07						1.55	1.29	1.64	0.59
	1.38	1.53	1.66	1.15						1.34	1.16	2.36	0.74						2.05	1.53	2.25	0.51						1.51	0.89	1.5	1.55						1.84	1.01	2.57	0.93						1.58	1.44	1.53	0.82
	1.84	0.37	2.02	0.65						1.63	0.33	1.29	1.44						2.02	1.14	1.67	1.14						1.58	0.8	1.49	1.41						1.88	1.93	2.45	1.24						2.3	1.4	1.63	1.02
	1.19	1.39	1.74	0.62						1.78	0.63	2.07	0.91						2.47	0.18	1.62	2.06						1.73	1.11	2.07	0.73						1.78	1.35	2.47	0.62						2.25	1.09	1.77	1.16
	1.92	0.55	2.35	1.02						1.79	0.46	1.37	1.08						1.47	0.48	1.55	1.16						2.25	1.77	1.44	1.16						1.69	0.13	1.75	0.77						1.41	0.83	1.82	1.38
	1.45	1.03	1.61	1.01						1.34	1.28	1.86	0.7						1.64	1.18	7.45	1						2.01	1.12	1.3	0.94						1.78	1.08	2.09	0.97						1.88	1.68	1.55	0.91
	1.54	1.86	1.57	1.07						1.38	0.66	1.99	0.94						2.44	1.15	1.37	0.97						1.98	1.24	1.53	1.13						1.2	0.91	2.37	0.96						2.62	1.43	2.56	0.95
	1.93	0.46	1.08	1.23						1.87	0.7	1.76	0.77						1.21	1.28	1.97	1.25						1.89	1.71	1.53	1.18						2.09	0.67	1.54	1.2						1.65	1.34	1.9	1.36
	1.88	0.37	1.6	1.21						1.53	0.77	1.85	1.29						1.55	0.89	2.21	0.67						1.49	0.26	1.39	1.15						1.52	1.76	1.57	0.93						1.62	0.36	1.52	0.53
	1.08	1.37	1.79	0.7						1.74	0.87	1.52	0.72						1.31	0.88	1.95	0.71						2.04	2.35	3.17	1.32						1.28	0.56	1.53	1.09						1.71	0.36	1.9	1.04
	1.19	2.33	1.78	0.9						2.59	1.7	1.07	0.55						1.75	0.93	1.79	0.78						1.25	1.23	1.48	1.62						1.44	0.3	2.1	0.86						1.62	0.89	1.51	1
	1.78	0.66	1.94	0.97						2.22	0.34	1.62	1.35						2.05	1.48	1.82	0.73						2.46	0.68	1.43	1.01						1.38	1.08	1.39	1.12						1.54	0.36	1.8	0.91
	2.21	0.7	2.61	0.65						1.28	0.89	4.07	2.16						1.76	0.33	1.62	1.08						2.54	1.09	2.02	1.49						2.08	1.46	1.96	1						2.1	1.23	2.14	0.96
	1.88	0.56	1.8	0.86						1.2	1.12	3.74	1.03						1.3	1.68	2.06	1.32						2.09	1.19	1.72	0.52						1.94	1.23	1.56	0.91						2.06	0.54	1.18	1.92
	1.93	0.62	2.18	17.92						1.56	0.6	2.5	1.48						2	1.33	1.62	0.72						2.34	1.32	1.32	0.77						2.15	1.22	1.6	0.65						2.91	0.3	2.69	1
	1.24	1.63	1.88	0.79						1.41	0.17	1.07	0.97						2.63	1.43	1.63	1.31						3.78	2.04	1.94	0.9						1.62	0.3	1.73	1.54						3.94	0.74	1.89	1.03
	1.88	0.26	1.21	0.52						1.93	1.1	2	1.23						1.84	0.85	1.74	1.46						1.3	0.68	1.88	0.79						1.62	0.16	1.57	1.06						1.25	0.88	2.66	0.9
	1.61	1.81	1.3	2.14						2.15	1.03	1.54	1.61						1.73	1.19	2.1	2.12						2.07	2.28	1.26	0.62						2.18	1.29	2.11	1.12						2.57	0.87	2.09	1.1
	1.17	0.96	2.54	0.75						1.6	1.09	1.4	1.11						1.66	1.04	1.65	1.45						1.49	1.6	2.51	0.89						2.41	0.6	1.3	1.03						2.14	1.33	1.26	0.91
	1.2	0.46	2.02	0.94						2.2	1.29	1.37	0.39						1.93	1.51	3.3	1.52						1.9	1.53	1.35	0.72						1.77	1.09	1.43	0.99						2.3	0.49	2.13	1.07
	2.26	0.18	0.86	1.02						3.26	1.72	0.97	1.62						1.85	0.24	1.52	1.19						2.13	1.24	1.65	0.79						2.89	0.25	1.34	1.54						1.86	1.57	2.55	0.82
	1.4	1.16	2.19	1.13						3.24	1.17	1.61	1.22						1.27	0.83	1.96	0.85						1.65	1.23	1.74	0.37						1.36	0.36	2.45	1.14						1.69	0.4	2.97	1.49
	1.41	0.94	2.11	1.07						1.62	1.39	1.54	0.8						1.6	0.9	1.59	1.95						1.43	1.04	1.37	0.97						2.4	0.94	1.43	1.18						2.09	1.44	2.15	1.01
	1.49	1.32	1.76	0.85						1.65	0.4	1.82	1.4						1.74	1.47	1.43	0.49						2.38	1.01	2.18	1.31						2.57	0.5	2.14	0.83						1.81	1.98	2.47	0.94
	1.48	1.05	1.78	1.16						1.43	1.99	1.39	0.43						2.04	1.42	3.82	1.02						0.91	2.42	1.46	0.87						1.99	0.95	2.4	1.06						1.54	1.19	1.78	0.39
	2.31	0.28	2.13	1.1						1.53	1.41	1.92	0.85						1.7	0.31	1.54	1.11						2.22	0.66	2.12	0.99						2.51	0.88	2.86	1.12						2.8	1.15	2.29	0.92
	2.17	0.28	1.84	1.24						1.56	1.05	1.43	0.65						1.56	0.61	2.25	0.86						2.82	0.67	1.96	1.2						2	1.06	1.96	0.85						2.04	1.69	1.76	1.12
	1.39	1.75	1.49	0.79						1.36	1.04	1.19	0.93						1.27	1.14	2.01	1.13						1.17	1.17	1.55	1.13						2.1	0.84	2.67	0.74						1.73	0.39	2.93	0.82
	1.83	1.31	1.7	1.18						1.35	1.33	2.18	0.88						1.56	0.78	1.2	0.56						1.22	0.56	2.1	0.66						1.3	1.26	2.15	1.01						1.8	0.42	1.33	1.51
	1.88	0.76	1.41	0.49						1.6	0.41	1.44	1.16						1.51	1.01	2.21	1.01						2.32	1.3	1.85	0.77						1.54	1.35	2.93	0.83						1.64	0.39	1.62	1.03
	1.39	1.61	1.48	0.89						1.71	1.42	2.29	1.96						1.44	1.16	1.26	0.87						2.35	1.07	1.3	0.86						2.29	1.16	2.03	0.91						1.65	1.37	3.13	1.24
	1.47	1.17	1.25	1.75						1.83	0.82	1.09	0.66						1.86	0.41	1.08	1.18						1.28	0.51	2.68	0.88						1.43	0.12	2.07	0.84						1.63	1.31	2.22	1.2
	1.92	0.55	2.11	1.44						1.38	0.68	1.65	1						1.61	0.35	1.96	0.92						1.05	0.88	1.33	1.19						1.58	0.17	1.42	1.34						2.42	0.44	1.77	1.35
	1.6	1.58	2.17	1.06						1.55	0.65	1.35	0.59						1.84	0.54	1.77	0.81						1.88	0.26	1.55	1.21						2.48	1.39	2.05	0.79						2.17	0.68	1.99	0.81
	1.04	1.59	1.9	1.21						1.67	0.3	2.75	1.05						2.83	1.08	1.62	1.17						2.16	1.01	1.94	0.81						1.84	1.97	2.24	1.1						1.97	1.68	2.14	0.97
	1.52	1.01	2	0.88						1.34	1.36	2.01	1.44						1.52	0.47	1.45	0.8						1.78	0.37	1.91	0.64						1.87	1.64	2.18	1						0.97	1.07	2.01	0.51
	2.69	2.23	1.51	1.22						1.85	1.62	1.59	0.79						0.87	2.05	1.82	1.25						1.62	0.21	1.24	1.07						2.04	1.3	2.47	1.3						1.39	1.98	3.76	0.87
	1.63	0.91	1.36	0.51						3.85	0.98	2.29	1.21						1.87	0.2	1.78	0.69						1.74	0.69	1.78	0.57						1.37	0.65	1.46	0.92						2.22	0.53	2.14	0.65
	1.12	0.55	1.35	1.02						1.43	0.82	0.93	1.17						1.32	1.79	1.45	1.01						3.54	0.49	1.84	1.25						2.3	1.22	1.46	0.75						2.4	1.49	2.02	0.7
	1.83	0.33	1.44	1.16						1.5	1.2	1.35	0.64						1.74	0.65	1.15	1.29						1.35	0.98	2.69	1.28						2.89	0.38	2.8	0.83						1.91	1.33	1.78	0.93
	2.18	1	1.15	0.99						1.01	1.2	1.41	1.57						1.72	1.05	2.5	1.03						1.99	1.42	1.57	0.78						2.6	1.4	2.2	0.84						2.34	0.89	2.14	1.05
	1.66	0.78	2.18	0.64						1.66	0.83	1.68	1.36						1.62	0.79	1.72	1.13						1.28	0.63	2.43	1.08						2.99	0.96	2.01	0.75						1.99	0.87	2.59	1.09
	1.6	1.02	1.74	0.92						1.52	0.97	1.19	0.68						2.34	1.17	1.78	1.02						1.26	0.54	1.92	0.83						1.85	1.61	1.77	1.27						2.66	1.16	1.56	1.26
	1.31	0.85	1.78	1.52						1.64	0.59	1.66	0.85						1.35	1.25	2.49	0.84						1.43	0.44	1.88	0.95						2.6	1.01	1.91	0.65						3.02	0.18	2.1	0.87
	2.3	0.35	1.65	0.91						1.23	1.06	4.64	0.9						1.74	1.08	2.23	0.81						1.52	0.16	1.87	1.19						1.47	0.39	1.63	0.4						2.14	0.84	2.04	0.94
	1.69	0.89	1.92	0.76						2.01	0.93	1.99	1.13						1.95	1.96	1.89	0.86						1.42	0.91	1.84	0.9						2.55	1.05	2.35	0.88						1.84	1.25	1.48	0.52
	1.98	0.78	1.57	0.7						1.56	1.34	1.36	0.82						2.08	0.45	2.18	1.42						2.3	1.18	1.84	0.95						1.26	0.81	1.66	1.34						2.64	1.19	1.84	1.12
	1.54	0.71	1.37	1.12						1.15	1.55	0.94	1.48						1.62	0.26	1.81	0.85						2.15	0.99	1.27	0.52						2.35	1.41	1.97	1.09						1.55	0.4	2.4	1.12
	4.1	0.85	2.3	0.98						1.38	1.95	1.45	0.46						1.66	0.88	1.66	1.46						1.64	1.08	0.95	0.92						2.01	0.94	2.09	1.66						3.64	0.3	2.34	0.77
	1.72	1.05	1.7	1.34						2.23	0.99	1.47	0.57						2.42	1.22	1.86	0.99						1.62	0.31	2.73	1.45						1.82	1.07	1.81	0.9						1.61	0.8	1.77	1.03
	1.7	0.84	1.4	0.7						2.14	1	2.4	0.93						1.24	1.89	1.08	1.08						1.52	0.48	2.26	0.95						1.68	1.23	1.55	1.05						2.33	1.65	1.88	0.88
	1.23	1.16	1.21	0.59						1.81	1.16	1.37	0.84						1.28	1.07	1.3	0.43						2.22	1.1	1.01	0.66						2.76	0.64	2.17	1.46						2.18	1.59	2.18	1.25
	2.26	0.31	1.5	0.91						1.81	0.87	1.35	0.72						1.61	0.4	2.25	0.69						2.2	1.11	2.19	0.71						1.88	0.92	2.16	1.31						1.83	0.69	2.85	0.85
	1.55	1.01	2.03	1.25						1.82	0.21	1.46	1.29						1.48	1.23	1.48	1.31						2.07	1.57	1.9	1.85						2.11	0.82	2.24	1.02						1.69	1.47	2.64	1.27
	1.99	1.52	2.38	1.19						2.1	1.95	1.68	1.14						1.19	1.51	1.38	0.7						2.09	0.27	1.51	1.4						1.74	1.74	1.5	1.11						1.83	0.35	1.85	1.18
	1.27	1.03	1.81	1.19						1.34	1.89	1.68	1.18						1.76	0.37	1.18	0.62						2.03	1.27	1.66	1.36						1.97	1.51	1.6	1.28						1.13	1.93	2.07	1.33
	1.86	0.31	1.41	0.92						1.27	1.37	3.41	1.46						0.89	0.82	1.86	0.62						1.15	1.05	1.47	0.86						1.72	1.71	2.12	0.93						3.21	0.78	3.07	1.02
	1.17	1.16	1.94	1.51						0.93	1.29	1.56	1.11						0.97	1.18	1.66	1.37						1.88	0.39	1.42	0.9						1.11	1.7	2.35	1.11						1.77	0.88	1.37	1.41
	2.32	0.89	1.26	0.4						1.54	1.9	2.19	0.58						1.79	1.37	1.82	0.9						0.89	0.84	2.48	0.94						1.81	0.38	2.72	0.98						2.95	1.13	1.67	0.61
	1.16	2.14	1.2	0.83						1.76	0.3	1.39	1.7						1.96	1.27	1.96	1.31						1.23	1.53	1.73	0.76						1.52	0.41	1.33	1.64						1.51	0.73	1.75	0.94
	1.26	1.32	1.2	0.98						2.27	0.47	1.51	0.71						2.68	1.41	1.76	1.06						2.18	1.76	1.32	1.45						1.98	0.95	1.6	1.03						1.67	0.52	1.91	0.93
	0.93	0.58	2.05	1.33						1.73	0.36	2.04	0.75						1.67	0.55	1.97	0.52						0.99	0.71	2.26	1.17						1.44	0.57	2.28	1.09						2.34	1.13	1.93	1.43
	1.98	1.04	1.34	1.03						1.16	1.13	1.35	0.93						1.51	0.62	1.22	1.44						1.73	1.15	1.59	1.22						1.9	0.89	1.47	1.05						2.28	1.05	2.29	0.93
	1.51	0.85	1.94	0.82						1.52	1.38	1.29	0.74						1.01	0.9	1.67	1						1.8	1.5	1.57	1.19						1.48	0.19	1.66	0.95						2.18	0.97	2.1	0.9
	1.37	1.28	2.75	1.03						1.2	0.97	1.67	0.92						1.57	0.31	1.34	0.94						1.5	0.32	1.38	0.78						1.76	0.97	2.7	1.3						2.39	0.49	3.03	1.37
	1.55	1.15	1.24	0.71						1.71	0.34	1.5	1.23						2.42	1.34	2.44	1.09						1.49	0.71	1.38	1.78						1.7	1.48	1.61	1.27						0.97	1.56	2.24	1
	1.49	0.99	2.4	0.92						1.49	1.5	2.34	1.18						1.54	0.88	2.74	0.77						1.41	0.51	2.27	0.84						1.88	1.21	2.76	0.92						1.68	0.28	1.8	0.82
	1.58	0.74	1.44	0.68						1.92	1.51	1.67	1.01						1.02	0.41	1.7	1.14						1.52	0.42	1.79	1.25						2.23	1.76	2.64	1.17						1.98	1.05	1.94	1.76
	2.55	1.54	1.57	0.87						1.25	1.94	1.73	0.49						1.44	1.18	1.32	0.51						2.45	1.02	1.66	0.67						1.28	0.28	1.5	0.98						1.81	0.56	1.81	1.68
	1.57	0.8	2.17	0.93						2.01	0.47	1.43	0.85						1.28	1.36	1.4	1.78						1.7	0.58	2.02	1.54						2.66	1	2.08	0.82						2.05	0.53	1.61	1.14
	2.42	1.95	2.79	1.22						1.37	0.64	1.65	0.86						2.23	1.3	1.32	0.78						1.12	1.39	1.63	0.73						1.85	1.55	1.61	0.93						2.53	0.51	1.28	2.17
	1.5	2.18	1.25	0.99						1.07	0.89	1.63	1.3						3.43	1.7	0.92	0.51						2.15	1.21	2.03	0.91						2.26	0.7	1.97	0.86						1.29	1.86	3.47	0.97
	1.48	1.02	1.41	0.77						1.34	1.04	1.65	0.94						2.61	1.07	1.53	0.93						2.09	1.53	2.53	0.71						2.51	1.3	1.35	0.68						1.92	1.3	2.73	1.5
	1.2	0.89	1.9	1.08						1.14	0.69	2.2	0.9						0.94	0.61	1.84	1.03						2.02	1.22	1.84	1.38						1.5	0.15	1.88	0.75						2.73	1.08	2.17	0.85
	1.11	0.39	2.18	1.14						1.58	1.08	1.68	1.22						1.21	0.7	1.52	1.1						1.59	0.6	1.8	1.2						1.79	0.95	1.43	0.8						2.68	1.14	1.71	0.89
	2.21	1.37	1.54	0.58						1.39	0.37	1.92	2.02						1.46	0.35	1.66	1.14						2.23	1.27	2.95	0.65						1.8	2.24	1.78	1.09						1.63	1.46	2.03	1.04
	1.41	1.63	1.39	0.26						4.68	0.88	2.35	0.85						1.23	1.11	1.26	1.09						0.98	1.85	1.62	1.02						2.04	1.41	2.35	1.34						1.74	1.24	1.58	2.47
	1.78	0.36	1.77	0.88						1.97	0.55	4.91	1.14						1.92	0.39	1.72	1.48						1.65	0.51	1.27	1.07						1.75	0.17	1.26	1.24						1.89	1.37	2.29	1.1
	2.11	0.95	1.16	1.85						1.45	1.13	1.03	0.75						1.1	1.39	1.09	0.93						0.94	0.53	1.7	0.82						2.27	1.89	1.48	0.71						1.62	0.95	1.4	0.87
	1.82	0.97	1.99	1.12						1.52	1.41	1.71	0.57						1.91	0.74	1.69	0.52						2.11	1.22	2.64	1.47						2.3	0.55	2.09	0.86						1.67	1.84	1.75	1.26
	1.75	0.59	1.17	0.84						1.46	2.12	1.66	0.99						1.77	0.25	1.16	1.26						1.47	1.08	2.08	1.39						1.16	1.31	1.36	0.73						1.77	1.16	1.94	2.08
	2.24	0.68	1.91	0.89						1.45	1.11	1.59	0.95						1.87	0.12	1.68	1.27						1.39	0.39	1.66	1.02						2.02	1.67	2.28	1.08						1.78	0.25	2.23	0.91
	1.47	1.07	1.64	1.09						8.77	1.93	1.77	1.23						1.58	1.05	2.02	0.58						1.17	1.05	2.47	1.31						3.97	0.57	2.22	1.47						1.94	1.81	2.27	0.82
	1.73	1.26	1.97	1.46						1.35	1.31	1.32	1.17						1.77	0.26	1.84	0.73						1.81	0.93	1.66	0.97						2.39	0.7	2.12	0.86						1.72	0.93	1.59	1.07
	1.78	1.4	2.28	1.09						2.03	1.1	2.45	0.94						2.88	1.17	1.69	1.06						1.21	1.83	1.61	1.41						1.94	1.92	1.8	0.77						2.05	1.58	1.83	1.97
	2.15	0.19	1.4	0.76						2.01	0.3	1.69	1.36						1.6	1.07	2.56	0.67						1.95	1.66	1.44	0.97						2.36	1.28	2.27	1.01						1.92	0.48	1.66	1.01
	1.4	1.18	2.74	0.5						1.33	1.35	1.25	0.53						3.2	1.24	2	0.68						2.51	1.24	2.27	0.79						2.03	0.78	1.77	1.05						2.4	1.18	1.77	1.63
	1.62	0.99	1.39	0.52						1.54	0.97	1.18	1.21						1.42	0.46	2.56	1.24						1.39	0.22	1.79	0.97						0.99	0.47	1.52	1.12						1.95	1.12	2.07	1.02
	1.89	0.78	1.76	0.77						1.53	0.94	2.01	1.17						1.59	0.95	1.29	0.81						1.96	1.15	1.33	0.94						1.83	0.13	1.63	0.7						2.95	0.43	1.95	0.86
	1.24	1.94	1.75	0.62						1.78	0.47	2.18	1.1						2.35	0.51	1.31	1.05						1.9	1.53	2.11	1.28						1.52	1.1	1.76	0.76						1.5	0.52	2.79	1.2
	1.18	1.38	1.33	0.98						1.83	0.93	1.78	1.46						1.08	1.38	2.23	1.25						1.83	1.31	1.76	1.39						1.83	0.92	1.19	0.9						1.36	0.65	3.08	1.18
	1.87	0.46	1.7	1.26						1.42	1.31	1.36	0.9						1.02	0.9	1.87	1.07						1.49	1.54	2.22	0.59						1.85	1.09	1.32	0.33						2.17	1.46	2.09	1.43
	1.66	0.23	5.24	0.89						1.09	1.34	1.86	0.88						1.39	1.13	1.48	0.43						1.55	0.22	1.96	1.04						2.29	0.68	3.14	1.21						1.47	0.06	1.47	1.7
	2.12	0.6	3.4	0.78						3.24	0.86	1.59	0.68						1.63	0.86	1.77	1.36						1.85	0.85	1.44	1.01						1.44	1.01	2.76	0.97						5.08	0.49	3.87	0.93
	1.24	1.5	2.1	0.68						2.23	0.51	2.57	1.16						2.15	1.52	1.63	1.61						2.36	1.65	1.78	1.55						1.88	1.58	2.58	1.01						2.93	0.8	2.34	0.86
	4.86	0.98	1.52	0.88						1.74	0.32	2.46	1.1						1.49	0.37	1.64	1.41						1.99	1.72	2.86	0.89						3.28	0.23	1.46	0.69						1.76	0.25	2.26	0.84
	2.02	0.53	1.98	0.79						2.07	0.83	1.71	1.37						1.43	1.46	2	1.48						1.84	0.33	2.13	0.94						2.15	0.78	2.19	0.97						2.26	1.68	1.68	0.44
	1.29	1.91	1.64	1.08						1.87	0.66	1.67	1.22						1.34	0.86	1.54	1.14						1.94	1.1	1.53	0.71						1.5	1.13	1.68	0.99						2.21	1.28	1.34	0.87
	1	0.85	1.51	0.45						2.42	1.68	2.68	0.83						2.37	1.14	1.22	0.88						1.22	1.16	1.85	0.76						1.55	0.27	2.22	1						1.9	1.07	2.14	0.82
	1.79	0.51	1.26	0.68						1.86	1.1	1.49	0.4						1.54	1.49	1.46	0.51						1.46	0.88	1.83	0.75						2.42	1.08	1.66	1.67						2.04	0.95	3.03	1.15
	1.72	1.1	1.66	0.58						1.66	0.49	1.4	1.11						1.3	0.86	2.94	1.11						1.81	0.24	1.51	0.41						2.39	2.15	2.43	1.33						3.41	0.46	3.16	0.97
	3.02	1.47	1.47	0.7						2.21	1.25	1.34	0.66						1.76	0.44	2.3	1.48						1.84	1.63	1.71	0.74						1.51	0.87	1.22	0.93						2.34	0.91	2.17	0.94
	5.21	1.5	3.12	1.07						1.66	0.77	1.39	1.06						1.08	1.43	1.86	0.93						1.03	0.96	1.64	1.47						1.93	1.55	2.48	1.73						2.2	1.58	3.01	0.88
	1.68	0.38	1.77	0.72						1.1	1.35	1.24	0.93						1.89	0.27	1.43	1.67						1.6	0.43	1.56	2.45						2.4	1.19	1.9	1.11						2.34	1.25	1.89	0.9
	1.1	1.47	1.23	0.45						1.29	0.77	2.02	0.78						2.82	0.7	1.67	1.33						1.04	1.89	1.85	0.68						3.88	0.85	1.81	0.66						2.28	0.96	1.82	1.32
	2	0.71	1.46	0.56						1.72	0.62	1.65	0.36						1.64	0.19	1.27	1.41						1.49	1.19	1.44	0.61						1.34	2.24	2.71	1.51						1.74	0.32	1.68	1.3
	1.95	1.62	1.41	0.77						1.89	0.16	2.08	0.64						1.49	0.87	2.04	0.98						1.97	1.26	1.15	0.51						1.69	1.78	1.23	0.56						2	1.27	2.5	0.79
	1.35	1.08	1	0.43						1.07	1.45	1.51	0.86						1.79	0.79	1.37	1.21						1.29	0.98	2.88	1.18						2.4	1.56	1.8	0.72						1.58	0.37	1.52	0.94
	1.39	1.49	1.94	0.56						1.41	1.24	1.16	1.01						1.73	0.14	1.12	0.58						2.4	1.31	1.97	0.44						1.32	0.29	2.53	1.45						2.15	0.39	2.07	1.02
	1.8	0.45	1.61	1.01						1.87	1.59	2.14	0.78						1.69	1.2	0.82	0.2						1.56	0.35	1.21	0.87						2.34	2.23	2.96	1.51						2.14	1.54	2.84	0.73
	1.52	1.04	1.38	0.21						1.02	0.78	1.71	1.1						1.84	0.31	1.17	0.52						1.48	0.72	1.58	1.51						2.53	0.75	1.43	0.95						1.6	0.23	2.26	0.63
	1.67	0.8	1.55	1.13						1.51	0.33	1.87	1.12						1.67	1.01	1.63	1.09						1.23	0.77	2	0.87						1.31	0.25	1.57	0.55						3.15	0.64	3.07	1.31
	1.57	0.68	1.56	0.95						1.9	1.34	1.09	1.47						2.28	1.37	1.65	1.56						1.17	1.26	1.98	1.62						2.08	1.03	1.81	2.26						1.86	0.28	1.99	0.82
	1.26	1.99	1.56	0.97						1.24	3.03	1.17	1.31						1.73	1.15	2.02	0.82						2.64	1.1	1.76	1.11						1.99	1.77	2.28	1.11						1.57	1.01	2.14	1.02
	1.49	1.38	1.15	1.35						2.11	0.38	4.22	1.04						1.51	1.2	2.07	1.35						2.21	0.46	1.39	1.03						1.67	0.19	3.26	1.43						2.4	0.78	2.58	0.74
	1.45	1.39	1.04	0.53						1.12	1.28	1.93	0.71						1.41	2.22	1.54	1.74						1.83	0.77	1.69	1.35						2.16	1.63	1.57	1.06						2.51	1.27	3.14	1.5
	1.35	1.39	1.88	0.72						1.95	1.03	1.12	0.85						1.84	0.97	2.28	0.87						1.83	0.23	4.78	0.89						1.84	1.59	5.48	0.84						1.92	0.46	1.63	1.03
	1.62	1.15	1.88	1						1.27	1.81	1.49	1.14						1.67	0.36	1.39	0.64						2.07	1.63	2.44	0.67						1.66	0.17	1.86	0.89						2.43	0.71	2.89	1.11
	1.97	0.87	1.29	1.05						1.35	0.62	1.25	0.97						2.92	1.04	1.61	1.06						2.19	1.3	1.63	0.91						2.2	1.52	2.66	0.89						1.64	0.79	2.45	0.8
	1.19	0.56	1.99	1.49						1.61	1.08	1.46	1.38						1.6	1.43	1.79	0.96						1.46	0.77	2.05	1.42						2.3	0.78	2.31	1.04						2.46	0.96	1.9	0.83
	1.88	0.49	2.2	1.34						1.61	1.29	2.44	0.97						1.68	0.29	1.57	0.78						1.62	0.6	1.91	1.27						1.03	0.7	1.96	0.8						2.44	0.86	1.46	1.42
	1.14	1.67	1.1	0.52						1.52	1.32	1.55	0.65						2.03	0.3	2.96	0.66						2.23	0.5	1.86	1.03						2.23	1.28	1.56	0.62						2.61	0.72	2.55	0.6
	1.88	0.53	1.56	1.41						2.31	1.05	1.86	1.17						1.87	0.91	1.86	0.69						1.84	1.86	2.91	0.82						1.28	1.11	2.99	0.79						2.33	0.63	3.14	0.98
	1.32	1.48	2.02	1.47						1.27	1.87	2.37	0.76						2.09	0.99	2	1.33						1.51	0.95	1.42	1.13						1.35	0.45	3.53	0.74						2.62	1.27	1.26	1.17
	1.83	0.4	1.41	1						1.39	1.11	1.77	1.6						1.85	0.46	1.92	0.92						2.06	0.95	2.22	1.06						1.69	0.36	2.6	0.9						1.72	1.17	1.84	0.72
	1.73	0.57	1.87	1.02						1.44	1.91	1.49	1.73						1.8	0.99	1.72	1.13						2.57	1.45	1.47	0.89						1.24	0.13	2.35	0.67						1.26	0.35	2.25	1.11
	1.42	1.38	2.58	0.79						1.58	0.46	2.78	0.07						1.41	1	1.33	0.66						1.66	0.29	1.43	0.85						2.65	1.3	2.06	0.74						1.52	0.37	2.03	0.49
	1.74	1.31	1.46	1.28						1.88	0.91	2.29	0.86						1.56	0.67	1.94	1.27						1.62	0.83	1.96	0.73						2.16	1.49	2.12	0.91						3.23	0.33	2.17	1.15
	1.29	1	1.86	0.9						1.65	4.13	1.38	1.25						1.37	1.13	1.98	0.68						1.77	0.21	2	1.2						1.41	0.31	1.86	1.12						1.98	0.9	1.61	0.67
	1.59	1.21	2.06	1.97						1.75	0.47	2.83	0.76						1.48	2.16	1.36	0.73						1.45	0.51	1.68	0.62						2.55	0.31	1.65	0.95						1.69	0.4	2.57	1.43
	1.3	1.22	1.6	1.33						2.69	1.34	1.15	0.54						2.13	0.68	2.11	1.04						1.8	0.51	2.74	0.84						1.56	1.48	1.8	1.13						2.68	1.18	2.2	0.91
	1.05	1.53	1.4	1.15						1.66	1.31	1.41	0.78						1.22	0.64	1.11	0.81						2.3	1.64	2.18	0.68						2.03	1.16	2.3	0.96						2.3	2.2	2.32	1.28
	1.96	1.31	1.55	1.72						1.38	0.87	2.14	0.79						1.66	1.11	1.73	1.5						2.4	1.38	1.22	0.99						1.35	0.76	1.68	1.23						2.06	0.92	1.54	0.87
	1.3	1.9	1.87	0.7						1.28	1.49	1.95	1.24						1.37	1.21	1.81	0.85						1.71	0.6	1.77	2.04						2.25	1.27	1.83	0.8						1.59	0.31	1.87	1.71
	2.61	1.42	1.72	1.43						2.02	0.3	1.94	1.44						2.71	1.62	1.51	1.06						1.8	0.14	1.37	0.82						1.33	0.7	1.89	1.22						2.05	1.81	2.11	1.34
	1.27	0.94	0.94	1.03						1.65	0.66	1.37	1.02						1.7	1.15	3	0.86						2.02	1.16	2.1	0.06						2.45	1.74	2.02	1.19						1.43	0.93	2.37	0.8
	1.53	1.03	1.97	1.01						1.87	0.41	4.47	0.65						2.53	0.94	1.23	0.98						1.26	0.58	1.08	1.46						2.63	0.14	1.55	1.05						2.1	0.37	1.36	0.91
	1.72	1.02	1.56	0.75						2.01	1.6	1.72	1.55						1.95	1.43	2.44	1.27						2.55	1.06	1.77	0.68						1.57	0.38	1.84	0.69						2.11	1.33	1.9	1.05
	1.48	1.53	1.48	1.38						1.9	1.36	1.03	0.55						1.3	0.37	1.58	0.93						0.9	1.21	1.64	1.59						1.28	1.09	1.73	0.88						1.47	1.19	2.04	0.93
	1.3	1.05	2.44	1.34						2.21	0.34	1.39	1.1						1.4	0.44	2.35	1.1						2.38	1.27	1.75	0.86						1.22	1.09	1.81	0.83						1.56	1.34	1.85	0.78
	1.65	1.4	1.85	0.95						1.5	1.42	1.55	0.86						1.35	1.05	1.99	1.05						1.69	1.45	2.34	0.93						1.47	0.14	2.09	0.79						2.71	0.51	1.53	0.77
	2	0.28	1.7	0.84						1.15	1.75	1.55	0.64						1.11	1.54	1.14	0.59						1.95	0.18	1.71	1.63						2.45	0.27	2.13	1.13						3.01	0.76	2.43	1.19
	1.76	0.51	1.22	0.94						1.83	0.58	1.35	1.51						2.79	0.79	1.42	1.01						1.13	0.5	2.15	1.01						2.21	2.08	1.38	0.52						2.18	1.24	2.07	1.21
	1.44	1.49	1.73	0.56						1.32	0.87	1.33	1.22						1.54	0.13	1.59	0.97						1.35	0.23	2	1.01						2.1	0.73	2	1.04						1.41	0.83	1.91	1.15
	1.14	2.15	2.19	1.08						2.04	0.83	0.7	0.62						1.9	0.32	1.55	0.69						1.44	0.25	1.7	1.34						1.25	0.93	1.51	1.14						2.18	1.16	3.2	0.81
	2.34	1.65	1.78	1.03						1.51	0.81	1.31	0.82						1.66	0.6	2.72	0.79						1.23	0.85	1.83	0.96						2.15	0.98	1.84	0.97						1.78	1.12	1.94	0.99
	1.69	0.66	1.01	0.89						1.48	1.27	1.59	1.15						2.11	1.77	2.13	0.78						1.82	0.22	1.84	0.78						1.36	1.58	3.98	0.93						1.76	1.84	3.57	1.07
	2.27	1.28	1.82	1.78						2.68	1.12	1.19	0.72						1.89	1.47	1.56	0.57						1.85	1.24	1.27	1.2						1.8	1.16	1.97	1.16						1.86	0.26	2.08	0.83
	1.24	0.78	2.35	1						1.34	0.57	1.43	1.14						1.23	1.01	2.03	1.03						1.49	0.2	1.84	1.32						2	1.52	2.23	1.06						1.85	0.94	2.05	0.8
	1.63	1.14	2.35	0.75						1.43	0.89	1.15	0.7						1.37	0.81	2.82	0.84						2.12	0.95	2.12	1.2						1.82	0.59	1.69	0.51						1.96	0.34	2.1	1.2
	1.39	1.72	1.49	1.35						1.42	0.88	0.93	0.7						1.87	1.68	1.24	0.6						1.5	0.16	1.67	0.98						1.16	0.75	2.32	1.2						1.77	0.75	3.43	1.05
	2.01	0.7	2.2	0.86						1.47	0.81	1.04	1.14						2.18	1.22	1.03	2.21						1.84	0.22	2.42	1.18						2.11	1.25	1.76	1.15						2.01	1.49	2.3	0.59
	2.59	0.89	2.09	1.22						1.5	1.46	1.35	1.18						1.32	1.68	1.9	0.9						1.64	0.2	1.4	1.07						1.92	1.47	2.05	1.68						2.28	1.49	1.87	0.86
	1.27	0.61	2.47	0.97						2.17	1.11	1.13	0.89						0.99	1.84	2	1.07						2.13	1.17	1.73	1.12						1.98	1.6	1.66	0.81						2.11	0.95	1.81	1.22
	1.98	0.26	1.93	1.06						1.71	1.42	1.76	0.96						1.6	0.32	1.57	0.8						1.74	1.12	1.59	1.24						1.1	0.87	2.35	0.91						2.25	0.97	2.58	0.98
	1.92	0.8	1.98	1.02						1.56	0.25	1.98	1.25						1.83	0.54	1.87	0.88						2.25	1.17	2.02	1.07						1.34	0.29	1.61	0.54						2.21	1.22	3.8	1.61
	1.47	1.17	1.48	0.93						1.07	1.33	1.99	0.88						1.92	1.33	1.21	0.67						1.63	1.19	1.8	1.01						1.6	0.5	2.61	1.16						1.62	1.7	2.15	0.84
	1.48	0.71	2.18	0.92						1.51	2.01	2.02	1.09						1.52	1.1	1.28	1.23						1.65	0.41	1.6	1.15						2.53	1.27	1.65	0.94						2.26	1.2	2.22	0.75
	1.37	1.15	2.35	1.03						1.16	1.36	1.22	0.8						1.43	0.31	2.04	1.11						2.68	1.42	1.82	1						1.61	0.92	1.3	0.81						2.41	2.05	1.68	1.14
	5.02	1.26	1.76	2.34						1.92	0.41	1.44	1.53						1.2	1.91	3.48	0.68						1.6	0.38	1.26	1.18						1.44	0.6	2.28	1.41						1.38	0.39	2.06	1.61
	1.52	1.91	1.09	1.02						1.97	0.34	2.15	0.91						2.27	1.65	1	1.02						1.81	0.2	2.12	0.73						1.65	0.78	1.43	1.41						2.85	0.75	3.76	0.84
	1.18	1.64	1.42	1.2						1.71	0.46	1.23	0.98						1.81	0.28	2.08	0.97						2	0.74	1.98	0.71						1.58	0.85	2.08	1.47						2.83	0.25	2.87	1.42
	2.11	0.2	2.31	1.12						0.78	1.69	1.69	0.76						1.73	0.71	1.37	0.69						1.85	0.71	2.29	1.22						1.75	1.3	1.41	1.51						2.01	0.67	2.28	0.95
	1.95	1.32	4.16	0.93						1.19	1.82	1.91	1.16						1.73	0.31	1.44	0.51						6.5	1.17	1.46	1.17						1.41	0.94	1.75	1.02						1.61	0.35	3.75	1.05
	1.32	1.06	1.57	0.61						1.57	0.58	1.69	0.72						1.36	1.78	2.02	0.59						1.56	2.38	3.12	1.73						1.62	0.8	2.35	1.16						1.54	0.43	2.89	1.05
	1.96	0.71	2.12	0.61						2	1.21	1.95	0.59						1.83	0.92	0.9	1.78						1.4	0.68	2.72	0.82						1.04	0.32	2.11	0.97						1.51	0.21	1.68	1.59
	1.27	1.03	1.22	1.53						2.2	0.76	1.62	0.97						1.09	0.96	1.34	0.49						1.74	0.53	2.11	0.7						0.88	0.29	1.79	0.73						2.14	0.39	1.81	1.23
	2.56	1.15	2.3	1.4						1.05	1.45	0.99	0.62						1.87	0.82	1.3	0.77						2.47	1.16	1.85	1.03						2.07	0.92	1.75	0.67						2.34	0.05	1.71	0.9
	1.5	0.21	1.83	0.7						1.45	0.71	1.88	1.32						2.33	1.63	2.8	0.82						1.91	2.22	1.28	0.69						1.56	1.47	2.15	0.68						2.51	1.29	1.96	1.49
	1.59	1.12	2.17	0.77						1.38	1.72	2.35	0.86						1.8	1.06	1.67	1.36						2.29	1.44	2.1	1.11						2.65	1.32	1.99	1.46						1.27	0.86	2.19	1.05
	1.91	0.39	2.3	1						1.65	0.91	2.04	0.85						2.57	1.95	1.64	0.76						1.53	0.93	2.69	0.16						2.08	0.81	1.84	0.65						2.23	0.99	2.64	1.47
	0.97	0.37	1.89	1.28						2.01	0.87	1.95	0.79						2	1.01	2.42	0.62						2.28	1.03	2.02	0.91						1.42	0.34	2.67	1.09						2.12	0.61	2.53	0.85
	1.71	1.26	1.77	0.83						1.42	1.33	1.8	0.91						2.09	0.63	2.43	0.78						1.86	1.4	2.01	1.03						1.38	0.89	1.69	0.95						1.79	1.06	2.35	0.93
	2.56	1.29	1.87	0.92						1.83	0.16	2.3	0.76						2.17	1.2	2.15	0.65						1.68	0.44	1.58	0.63						1.98	1.22	1.91	0.95						1.62	0.09	2.22	1.11
	1.48	0.87	1.72	0.79						1.35	0.66	1.23	0.47						1.34	0.23	1.2	1.03						2.18	0.21	1.68	0.89						1.73	0.19	1.93	0.85						1.85	1.18	1.51	0.98
	1.77	1.11	1.59	0.58						2.31	1.46	1.67	1.19						2.52	1.21	1.39	1.57						1.96	1.89	2.36	1.3						2.61	0.7	3.13	1.16						1.78	0.99	3.08	0.87
	1.58	1.16	1.75	1.01						1.83	1.23	1.61	0.95						1.96	0.65	1.55	1.36						1.63	1.18	1.87	1.56						0.84	2.04	1.92	0.93						1.58	1.79	2.12	0.72
	1.62	0.91	1.15	1.05						1.69	0.94	1.3	1.28						2.14	0.59	2.94	1.01						1.23	1.11	2.59	0.91						1.99	1.05	1.17	0.84						1.42	0.64	1.88	0.86
	1.4	1.03	1.61	1.12						1.35	0.87	1.65	1.23						2.73	1.36	2.19	0.77						1.89	1.39	1.52	0.7						2.49	1.04	1.57	1.04						2.33	1.4	1.99	0.82
	1.6	0.76	2.07	0.69						1.49	1.89	1.44	0.67						1.74	0.8	1.32	1.18						1.66	1.07	2.17	0.93						2.33	0.82	1.91	0.74						1.57	0.81	2.19	0.6
	1.3	1.43	2.14	1.2						1.11	1.05	1.76	0.77						2.67	0.95	1.37	0.87						1.74	1.48	1.49	2.27						2.42	0.39	1.95	1.12						1.96	0.27	2.27	1.22
	1.08	0.21	1.31	0.94						2.25	0.89	2.23	1.46						1.69	0.42	1.63	0.6						1.09	1.33	2.65	1.12						3.57	0.93	2.89	1.09						1.25	1.02	1.61	0.6
	0.85	1.08	1.73	1.16						1.46	1.1	1.6	0.68						1.99	1.17	1.23	0.99						1.34	0.23	1.09	0.7						2.49	0.69	2.64	0.93						1.77	1.58	2.17	1.47
	2.1	1.49	2.17	0.99						1.93	1.25	1.98	0.92						2.12	1.05	1.3	1.38						2.07	1.31	1.87	1.45						1.47	1.68	1.33	0.72						2.68	1.22	2.36	0.75
	1.45	0.62	1.13	0.7						1.51	1.2	1.42	1.11						0.97	1.84	1.65	1						1.24	0.22	1.94	1.06						2.19	1.05	1.95	0.74						2.16	0.75	2.01	0.69
	1.23	1.46	1.8	0.73						1.64	0.51	1.8	1.07						1.6	0.49	1.41	0.72						1.88	0.42	1.1	1.82						1.75	1.19	2.06	0.8						2.03	1.54	1.83	1.17
	1.08	1.11	1.63	1.27						1.79	0.5	1.83	1.22						1.48	0.47	1.5	0.59						1.31	1.84	1.88	0.79						1.69	2.15	1.71	2.3						1.85	0.82	2.53	0.67
	1.88	0.91	1.4	0.57						1.57	0.29	1.77	1.45						1.7	0.22	1.96	0.93						1.87	0.45	1.78	1.29						1.83	1.29	1.51	1.3						2.08	1.29	2.88	0.98
	1.49	1.47	1.56	0.85						1.68	0.29	1.62	0.81						1.35	0.73	1.52	0.62						1.32	0.71	1.09	0.98						1.75	1.37	1.63	0.87						2.09	1.65	1.8	1.44
	1.37	1.58	1.23	0.73						1.97	1.24	1.1	0.78						1.93	0.29	1.98	0.96						2.23	1.44	2.28	1.27						1.24	0.3	2.94	0.92						1.8	1.92	2.21	0.81
	1.92	1.4	1.13	1.98						1.76	0.49	2.06	0.88						1.72	0.74	1.51	0.69						1.23	0.84	1.03	0.9						1.1	0.08	2.44	1.14						2.22	1.41	2.52	1.48
	1.57	1.66	1.47	1.14						2.15	1.29	1.33	0.58						1.38	0.93	1.28	0.67						1.9	1.5	1.65	0.67						1.14	0.26	1.45	1.73						1.41	0.64	1.46	2.02
	1.29	0.92	1.93	1.5						1.57	0.8	1.63	1.49						1.72	0.25	1.48	1.33						2.44	1.27	1.58	1.18						2.54	1.17	2.22	0.5						1.6	1.58	1.86	1.5
	1.59	1.48	1.38	1.08						1.08	0.72	1.47	1.25						1.27	1.36	1.04	1.04						1.37	0.37	2.71	0.99						2.55	0.93	2.14	1						1.59	0.51	2.85	1.47
	1.81	0.46	1.49	1.3						1.18	1.63	2.82	1.03						2.22	1.17	1.05	0.49						1.7	0.25	1.89	0.92						2.04	1.33	1.28	0.8						2.03	0.77	1.8	0.72
	1.38	1.46	2.07	1.33						1.27	1.52	1.65	1.11						0.98	1.51	1.78	1.24						1.82	1.32	1.75	1.55						1.7	0.85	1.37	0.89						2.76	1.13	1.24	0.81
	1.85	0.49	1.84	1						1.12	0.97	1.56	1.15						2.39	1.09	1.4	0.93						1.81	0.11	2.32	1.08						1.38	0.35	2.25	1.21						2.58	1	1.88	0.85
	2.12	0.7	1.46	1.03						1.46	0.75	1.67	0.93						1.1	1.48	1.71	0.72						1.89	1.13	1.54	0.81						1.54	0.31	2.09	0.94						2.4	0.68	1.92	0.94
	2.02	0.56	1.86	0.82						2.19	0.49	2.11	0.67						1.38	0.57	1.35	1.2						1.71	0.94	2.21	0.56						1.83	0.68	1.36	0.72						1.25	1.12	2.04	0.7
	1.48	1.05	0.89	1.01						1.35	0.93	1.57	1.05						1.85	1.22	1.79	0.61						2.04	1.36	1.27	1						2.8	0.98	1.33	1.38						3.23	1.23	2.45	1.47
	1.5	1.57	1.73	1.03						1.23	2.08	1.39	1.15						1.78	1.07	1.17	1.73						2.81	0.97	1.62	1.28						2.03	1.2	1.49	1.07						1.63	1.86	2.7	1.09
	1.62	0.72	2.16	1.03						2.54	2.29	2.11	0.92						1.03	0.79	2.42	0.58						1.28	1.3	1.37	1.51						1.61	0.5	2.66	0.76						1.56	0.51	2.14	0.5
	3.09	1.03	1.7	1.5						1.94	0.59	2.19	0.78						1.24	0.99	1.23	1.29						1.91	1.67	1.44	0.85						1.72	0.44	1.92	0.99						1.92	1.28	1.61	0.48
	1.45	1.17	1.64	1.3						1.26	1.83	1.36	1.62						1.63	0.87	1.21	0.73						2.05	1.69	2.09	0.84						1.74	0.23	1.85	0.58						1.51	0.56	1.66	0.63
	2.11	1.2	2.21	1.15						1.07	1.81	1.19	0.42						1.17	1.85	1.97	0.86						1.95	1.01	2.32	1.01						3.27	0.23	2.23	1.06						2.61	1.59	2.73	1.14
	1.46	1.04	2.07	0.75						1.47	1.56	1.64	1.05						1.11	0.85	1.57	1.37						1.63	0.71	1.17	0.39						0.84	1.04	2.13	1.03						2.77	1.35	2.25	1.85
	1.62	1.03	2.38	1.05						1.08	0.69	2.04	1.23						1.35	1.29	1.63	1						2.32	0.94	2.12	0.71						1.85	1.36	2.99	1.61						1.94	1.86	1.78	1.26
	2.65	1.76	2.97	1.53						1.59	1.2	1.66	1.32						1.18	1.01	1.34	0.63						1.09	1.91	1.74	1.23						1.67	2.16	1.89	1.28						2.36	1.23	2.26	1.31
	2.07	0.67	1.99	1.08						3.1	1.45	2.14	1.03						1.81	0.99	2.49	0.71						1.11	1.54	1.67	1.36						1.63	0.31	1.69	0.83						2.07	2.12	2.8	0.99
	1.95	0.95	2.11	1.01						3.58	0.52	1.72	1.41						3.25	0.76	1.46	1.28						1.61	1.67	1.28	0.91						1.36	0.6	1.62	1.72						2.33	1.38	2.58	0.92
	2.32	1.72	1.26	0.65						1.21	1.12	4.54	1.08						1.11	0.81	1.49	0.98						2.43	0.76	1.82	0.98						2.02	1.42	2.11	1.07						1.08	0.61	1.73	0.57
	1.89	0.36	1.56	0.75						1.35	0.79	1.59	1.01						1.59	0.51	1.92	0.92						2.02	1.57	1.48	0.91						1.63	1.01	2.38	1.62						1.88	0.72	2.04	0.99
	1.8	0.44	1.68	0.6						1.51	0.94	2.48	1.08						1.36	0.45	1.34	1.04						1.53	0.16	1.75	3.8						1.9	1.31	2.01	1.02						1.27	0.82	1.71	1.42
	1.89	0.47	1.42	0.79						2.71	1.22	1.22	1.46						1.77	0.25	1.82	1.43						1.39	0.78	1.86	0.84						2.11	0.92	2.27	1.19						2.05	1.36	1.18	1.24
	1.8	1.14	1.56	0.82						1.53	2.02	1.17	0.9						1.57	2.03	1.68	0.81						1.86	1.02	1.64	1.08						1.78	0.95	1.82	0.9						1.72	1.51	2.88	0.82
	1.45	1.39	1.62	0.7						1.5	0.41	1.4	0.94						1.42	1.28	2.05	1.13						2.17	1.64	1.82	0.84						1.69	1.51	1.51	0.68						1.04	1.8	1.32	1.42
	1.53	2.22	1.76	0.82						1.24	1.46	1.55	1						1.76	0.23	2.38	1.03						1.34	0.58	1.64	1.34						2.04	1.23	1.25	0.59						1.81	0.83	2.01	1.35
	1.53	1.2	1.87	0.76						1.9	0.96	1.83	0.89						1.59	0.3	2.34	1.18						1.67	1.99	2.29	0.8						1.87	1.06	2.37	1.15						2.17	1.51	1.65	1.16
	0.99	0.52	1.7	1.48						1.3	0.98	1.74	0.62						1.29	1.92	2.19	0.52						1.18	0.77	1.92	1.05						1.61	0.21	1.39	0.96						1.56	1.63	2.48	0.64
	1.6	1.61	2.07	1.03						1.55	1.24	1.04	1.32						2.42	1.52	1.55	1.06						2.09	1.15	1.85	0.91						2.62	0.85	0.95	2.13						2.85	0.44	2.9	1.12
	1.45	1.72	1.26	0.94						1.32	0.55	1.78	1.32						1.67	0.23	2.59	0.75						4.49	0.65	1.77	1.24						1.49	1.55	2.79	1.15						1.99	2.07	3.01	1.55
	2.08	0.64	2.54	1.35						1.45	1.19	1.84	1.12						0.98	0.73	2.29	1.03						1.69	0.15	1.36	0.94						2.44	0.48	2.08	0.98						1.45	0.24	1.55	1.05
	2.08	0.74	1.28	0.95						1.4	1.35	1.82	0.71						1.51	1.27	2.19	0.9						2.03	0.99	2.54	1.06						2	0.72	1.82	0.5						2.04	0.81	2.06	0.81
	2.37	1.07	2.35	0.82						1.28	1.86	2.05	1.03						1.86	1.42	1.17	1.24						1.97	0.39	1.98	0.8						1.97	0.08	2.38	0.81						1.36	0.31	2.2	1.7
	1.75	1.66	1.2	0.63						1.71	0.36	1.84	0.75						1.8	0.67	1.53	0.82						1.41	0.86	1.62	0.7						2.77	0.35	2.17	0.59						1.31	1.32	2.43	0.92
	1.56	1.18	0.96	0.8						1.05	1.87	1.55	0.91						2.22	1.33	0.98	0.77						2.45	1.43	2.4	1.12						1.97	1.05	1.96	1.32						2.4	1.01	2.15	0.8
	1.82	1.76	2.03	1.06						1.15	1.82	1.13	1.14						2.03	0.85	1.6	0.74						0.9	1.65	1.67	0.99						2.61	1.06	1.53	0.88						2.24	1.59	3	0.85
	1.44	1.52	1.12	0.63						1.94	0.66	1.29	1.43						2	0.69	1.2	1.24						1.49	0.66	1.23	1.06						1.85	1.84	1.8	1						3.67	0.33	1.49	0.86
	1.74	1.09	2.29	0.63						1.38	1.13	1.67	1.14						1.86	0.56	1.82	1.33						1.83	0.73	1.62	0.92						2.09	1.3	2.37	0.88						2.06	1.13	2.66	0.79
	1.62	1.29	2.39	1.23						1.36	1.27	1.14	0.99						1.59	1.07	1.27	1.44						1.8	0.39	1.96	0.63						1.8	0.97	1.61	0.71						1.68	0.71	1.77	0.74
	1.61	1.65	1.54	1.11						2.35	0.27	1.32	0.58						2.46	1.26	1.52	1.56						1.02	1.71	1.78	1.22						1.79	1.42	3.44	0.89						2.64	0.46	1.75	0.77
	1.66	0.71	1.4	1.14						1.09	1.7	0.97	0.74						1.81	0.36	1.69	1.12						1.91	1.38	1.41	1.89						1.48	0.22	1.87	1.01						2.03	1.2	1.85	1.08
	1.4	0.6	1.22	0.42						2.12	1.09	2.02	1.15						1.7	0.91	1.4	0.58						1.83	0.24	1.83	1.15						3.07	0.16	1.4	0.95						1.59	0.27	1.68	1.52
	2.07	1.46	1.71	1.29						1.77	1.23	1.01	0.82						2.03	1.25	1.16	0.94						1.33	1	2.29	1.32						2.34	1.28	1.86	1						1.31	0.6	1.33	2.65
	3.91	0.96	1.15	1.17						1.46	1.9	1.86	1.03						1.79	0.32	1.75	0.53						1.5	0.32	2.16	0.85						1.92	1.52	1.88	0.8						1.41	1.4	2.28	1
	1.05	1.87	1.44	0.7						1.08	1.18	1.75	0.87						1.79	0.31	1.49	0.85						1.42	2.59	2.21	0.85						2.41	0.8	1.28	0.9						1.95	1.52	1.41	0.73
	1.94	0.29	1.52	0.53						1.66	0.25	1.05	1.56						2.76	1.41	2.08	0.86						2.16	1.48	2.03	0.45						1.03	0.66	1.83	0.65						2.11	0.81	2.21	0.82
	1.18	0.92	1.8	0.85						1.89	0.54	1.18	0.38						2.64	1.79	1.76	0.76						1.44	1.44	1.17	0.44						1.4	0.31	1.83	1.1						1.6	0.42	2.3	0.5
	1.27	1.07	1.14	1.13						1.78	1.29	1.85	1.21						2.44	2.09	2.68	0.68						2.02	1.37	2.64	1.26						2.52	0.98	1.57	0.78						1.87	0.88	1.42	0.98
	1.31	1.06	1.6	1.01						1.74	0.46	1.05	0.54						2.47	1.41	1.59	0.96						1.95	0.48	1.77	0.59						1.44	0.23	2.26	0.76						1.33	0.29	2.02	0.56
	1.7	1.32	2.24	0.86						1.51	0.91	1.26	0.68						1.86	0.81	2.58	0.95						2.59	1.14	1.66	1.39						1.51	0.26	1.53	0.54						1.42	0.48	1.67	0.76
	0.96	1.65	1.4	1.08						1.09	0.55	1.64	1.11						1.78	0.4	1.82	1.14						1.55	0.1	1.33	0.93						1.35	2.09	2.77	1.33						2.4	0.57	1.88	0.66
	2.04	0.23	1.36	0.88						1.6	0.3	1.67	1.15						1.51	0.63	2.14	0.93						1.76	1.51	2.42	1.1						1.61	0.73	1.19	0.51						3.13	0.67	2.26	1.04
	1.65	0.83	1.43	1.15						1.08	1.9	1.74	0.9						1.91	1.44	1.79	0.89						2.24	0.91	1.26	0.59						2.44	0.97	1.69	1.23						2.09	1.71	1.79	1.29
	1.84	1.18	1.84	0.96						2.08	0.79	2.01	1.48						1.77	0.46	2.62	1.37						1.56	1.15	1.58	0.8						2.54	1.02	1.36	1.08						3.05	0.54	1.98	1.5
	1.63	0.44	2.22	1.51						2.23	0.91	1.42	1.51						2.3	1.61	1.86	1.31						2.19	1.93	2.11	0.81						2.09	1.4	1.89	0.82						1.91	0.64	2.03	0.71
	1.52	1.2	1.59	1.65						1.68	0.31	1.33	0.69						3.43	1.06	0.96	1.68						1.53	1.79	1.92	0.66						1.93	1.68	2.26	0.59						2.85	0.42	2.11	0.58
	1.32	0.75	2.16	1.18						1.41	0.89	1.89	0.75						1.85	1.27	2.01	1						2.01	1.04	2.27	0.62						1.67	1.1	1.94	1.71						2.47	1.16	1.75	0.62
	1.54	1.48	1.48	0.6						1.67	0.54	1.58	1.43						1.74	0.94	1.27	0.81						1.8	1.59	1.62	1.41						1.96	1.49	2.57	1.45						2.66	0.48	2.47	0.82
	1.32	1.4	1.98	1.04						1.06	1.57	3.96	2.71						1.13	1.34	4.28	0.79						1.68	0.34	1.68	1.34						2.41	0.98	1.39	1.03						1.97	0.85	2.74	0.94
	1.36	1.29	1.53	1.62						1.4	1.01	1.99	1.01						1.59	1.06	1.56	1.29						2.45	1.26	1.72	1.21						1.6	0.23	3.01	1.54						1.45	1.2	2.68	0.49
	1.53	1.23	2.07	0.71						1.31	0.24	1.38	0.71						1.6	0.31	1.33	0.81						2.06	1.38	1.25	0.78						2.14	0.9	1.44	0.73						1.4	0.61	2.6	0.44
	1.14	1.78	2.03	1.18						1.65	0.91	1.69	0.78						1.92	1.27	1.78	0.62						1.66	0.77	1.49	1.58						1.68	0.23	1.6	0.89						1.77	0.64	1.59	1.24
	1.21	1.37	1.86	0.72						1.45	1.07	1.04	0.3						1.65	0.16	1.23	0.79						1.94	0.99	1.37	0.56						2.24	1.15	1.59	0.75						1.5	0.59	1.98	0.6
	1.51	0.9	1.48	0.57						1.3	1.44	2.56	0.97						1.44	1.43	1.3	0.94						2.35	1.4	2.57	1.4						1.15	0.66	1.68	1.59						1.78	0.45	2.73	1.01
	1.84	1.21	1.34	0.95						1.57	0.48	1.71	1.73						1.21	1.55	2.26	1.06						1.87	1.78	2.77	0.69						1.94	1.71	1.83	0.84						1.93	1.61	2.87	0.71
	1.18	1.12	1.79	1.01						1.43	2.25	1.78	1.29						1.71	0.68	1.86	0.45						2.49	1.61	1.93	1.31						1.88	0.99	2.2	0.71						1.82	1.36	3.09	0.96
	1.42	1.27	1.4	1.42						0.82	1.83	1.54	0.8						1.45	0.63	1.68	1.33						1.58	0.26	1.07	1.35						1.49	0.24	1.77	0.88						1.86	1.99	2.55	0.85
	1.35	0.91	2.05	1.07						1.76	0.8	1.38	1.07						1.24	1.95	1.66	0.98						2.21	1.87	2.3	0.65						1.59	0.15	2.15	0.51						2.26	1.41	2.73	0.86
	0.95	1.47	2.1	1.22						1.37	0.77	1.28	0.91						1.18	1.49	1.48	0.97						1.85	0.5	1.92	0.51						1.83	1.53	2.01	2.12						2.33	0.75	1.92	0.71
	1.2	2.41	1.58	1.1						1.49	1.19	2.21	1.18						1.37	0.2	1.76	1.21						1.84	0.23	1.87	1.59						2.15	1.32	2.19	1.71						2.12	0.93	2.44	0.9
	1.64	1.27	2.26	1.2						1.79	0.79	1.89	0.54						1.72	1.81	1.19	0.45						2.19	1.48	1.09	1.39						1.26	0.75	1.56	1.23						1.56	0.65	3.02	0.85
	1.6	1.56	1.46	1.2						1.76	0.3	1.28	1.19						0.93	1.49	1.46	0.99						1.46	0.97	1.5	0.89						1.93	0.91	2.39	1.02						1.97	1.34	2.11	0.58
	1.57	0.42	1.83	1.44						1.45	0.56	1.74	1.38						1.45	1.15	1.95	1.05						1.6	1.21	2.46	1.22						2.17	1.34	2.34	0.85						2.18	0.29	2.27	0.78
	1.22	1.4	1.66	1.41						1.74	0.6	1.31	0.9						1.52	1.3	1.69	1.08						1.6	0.34	1.92	0.69						1.63	0.87	2.24	0.57						2.47	1.55	2.9	0.77
	1.18	0.91	1.87	0.55						3.76	1.12	1.67	1.26						2.83	1	1.5	1.53						1.45	0.92	1.96	0.71						2.44	0.27	2.61	1.17						1.93	0.75	2.31	0.45
	1.26	1.84	1.34	1.4						3.04	0.82	1.64	1.31						1.75	0.32	1.71	0.8						2.18	0.83	2.46	0.62						1.59	1.07	2.5	1.02						2.07	0.86	2.05	0.61
	1.78	1.03	1.82	0.77						3.58	1.26	1.85	1.98						1.4	1.38	1.21	0.62						2.53	1.33	2.54	1.01						2.28	0.97	1.58	0.8						1.77	1.13	4.48	0.96
	1.87	0.28	2.65	0.95						2.89	1.71	1.18	0.62						1.5	0.65	2.15	0.95						2.13	1.07	2.05	0.82						2.09	1.56	2.24	0.83						2.27	1.37	1.5	1.15
	1.52	1.09	1.55	0.6						3.6	1.62	1.52	0.92						1.7	0.39	1.76	1.16						2.6	1.7	2.5	1.09						1.39	0.22	2.79	0.84						1.88	1.32	1.92	0.85
	1.23	1.44	1.68	1.16						1.42	1.01	1.7	0.5						1.86	0.75	1.79	0.89						1.98	1.55	2.48	1.23						1.05	1.87	1.35	1.37						2.04	1.21	2.43	0.67
	1.52	0.47	2.27	1.06						2.07	1.2	2.35	0.98						1.41	0.95	1.66	0.33						1.29	0.96	1.76	0.67						1.71	1.34	1.58	1.02						2.96	1.55	2	0.88
	1.38	1.6	2.24	0.93						1.64	1.06	1.33	1.24						1.42	1.31	1.72	2.41						2.8	1.06	2.43	0.89						2.09	2.08	1.84	1.21						1.73	0.52	2.68	0.82
	1.78	0.53	1.94	1.01						1.38	1.29	2.13	1.23						1.19	1	1.23	0.64						1.64	1.11	1.05	0.66						1.54	1.52	1.28	1.5						1.98	0.45	1.16	1.42
	1.78	0.36	2.37	0.83						2.69	1.4	1.33	2.31						2.34	1.14	2.09	1.19						2.5	1.24	2	0.7						1.57	0.91	2.04	0.85						1.72	1.27	3.11	0.8
	2.17	0.32	1.19	0.97						1.4	1.29	1.55	0.96						2	1.1	1.62	0.59						1.51	0.45	1.44	0.76						2.33	1.04	2.02	1.07						2.22	0.24	1.64	1.7
	2.19	0.41	1.4	0.73						1.55	0.86	2	1.31						1.29	0.45	2.01	1.08						2.2	2.1	1.64	0.9						1.95	1.68	2.54	1.28						3.65	0.62	2.03	0.59
	2	0.39	2.82	1.27						2.07	0.53	2.08	0.6						1.36	0.41	2.44	0.83						1.32	0.51	1.63	1.09						1.36	1.47	1.68	1.14						2.32	2.01	2.35	1.55
	1.78	0.61	5.22	2.18						1.34	1.56	1.86	0.84						1.21	2.19	2.07	0.7						1.37	0.89	2.06	1.15						2.15	1.02	1.93	1.04						2.07	0.14	2.14	0.98
	1.85	1.65	1.9	0.95						1.39	1.7	1.42	0.71						1.58	0.22	1.73	1.06						2.37	1.08	2.38	0.87						1.22	1.53	1.91	0.83						2.51	1.4	1.69	0.86
	1.39	1.65	1.51	0.42						1.33	0.81	1.7	0.77						0.98	1.43	1.19	1.13						1.8	0.43	1.91	0.88						2.25	0.81	1.74	0.93						1.47	0.29	1.45	0.55
	1.62	0.74	1.52	0.71						1.65	0.56	1.01	0.8						1.36	1.44	1.77	1.23						1.5	0.77	1.82	1.01						2.63	1.01	0.9	0.65						1.89	1.69	2.32	1.05
	1.75	0.72	1.73	0.65						2.09	0.37	1.14	1.29						1.18	1.39	1.73	0.98						2.17	1.4	1.66	0.96						1.97	1.2	1.71	0.96						1.18	0.86	2.13	1.07
	1.75	1.23	1.88	0.72						1.77	1.41	2.06	1.08						1.91	1.71	1.32	1.32						1.49	0.56	2.68	0.98						1.29	0.52	1.74	1.33						3	0.75	2.33	0.95
	1.45	0.24	1.26	0.76						1.04	1.07	1.73	1.15						1.25	1.34	1.86	1.26						2.24	0.98	1.91	1.03						2.54	1.15	2.15	1.06						1.97	1.91	1.31	1.11
	0.89	1.28	2.33	0.84						1.89	1.39	1.82	1.61						1.78	1.11	2.71	0.59						3.32	0.46	1.82	1.01						1.66	1.85	1.76	1.06						1.9	0.26	2.31	0.68
	1.36	1.41	1.96	1.1						1.71	0.43	1.28	1.04						1.52	0.68	2.04	0.47						3.19	0.29	1.55	1.04						1.23	1.58	2.25	0.81						1.76	0.37	1.89	1.37
	2.29	0.91	1.39	1.32						1.9	1.12	1.82	1.01						2.58	0.92	1.93	0.79						1.92	1.44	2.72	0.98						1.65	0.85	1.87	0.71						1.59	0.73	1.88	1.11
	1.2	1.24	1.28	0.59						1.74	1.52	1.95	1.21						1.77	0.22	1.59	1.83						1.3	1.04	2.21	1.26						2.81	0.29	1.87	1.28						1.88	0.83	1.41	1.45
	1.21	1.06	1.63	0.82						1.99	0.76	1.37	0.76						1.41	1.3	1.81	0.57						2.27	1.39	1.78	0.65						0.97	0.77	1.67	1.69						2.26	2.26	1.79	1.26
	1.95	0.26	1.53	0.67						1.33	0.54	1.88	1.7						1.19	1.78	1.8	1.01						2	1.7	1.64	1.05						2.62	0.74	1.41	0.84						3.24	0.77	1.15	0.55
	2.01	1.24	1.3	0.95						1.2	1.34	1.38	0.7						1.72	0.52	1.52	1.02						1.49	0.94	2.08	0.06						1.95	1.32	1.83	1.49						2.03	0.88	1.57	1.33
	1.65	0.58	1.73	1.05						0.91	1.44	1.87	1.03						1.62	0.43	1.81	0.71						1.63	0.08	1.32	0.66						1.99	1.54	1.69	0.43						1.68	0.27	1.63	0.84
	1.12	0.78	2.19	0.95						1.54	0.38	0.77	2						1.22	0.7	1.51	1.06						2.29	0.2	1.45	0.82						2.22	0.53	1.67	1.17						2.9	1.58	1.75	0.87
	0.99	1.84	1.5	0.7						1.64	0.64	2	0.76						1.57	1.08	1.35	0.74						2.34	1.33	1.78	0.81						2.09	1.08	2.08	0.68						2.44	0.41	1.86	0.81
	1.85	0.34	1.59	1.29						1.55	0.97	1.65	1.43						2.05	0.47	2.39	1.1						1.34	0.89	1.38	0.94						1.64	1.19	1.66	1.11						2.23	0.98	1.61	1.08
	1.28	0.42	1.92	1.78						1.18	0.85	1.76	1.38						2.29	1.24	1.91	0.94						1.68	0.51	1.16	0.64						2.34	1.49	1.49	1						1.33	0.25	2.06	0.66
	1.31	1.03	0.93	0.8						1.68	0.94	2.72	0.96						1.7	0.85	1.19	1.2						1.32	1	1.68	0.88						2.28	1.51	1.35	1.39						1.46	0.31	1.77	1.05
	1.44	1.43	1.45	0.76						1.83	1.39	1.41	1.22						2.55	0.81	2.26	1.38						1.17	2.02	1.99	0.96						1.71	1.83	2.15	0.95						2.22	0.95	2.35	0.72
	1.84	0.52	2.39	0.85						1.49	1.17	1.43	0.92						1.72	0.25	1.8	0.89						1.66	0.27	1.53	0.6						1.68	1.17	2	1.03						2.95	1.16	1.14	1.81
	2.27	1.24	1.87	0.72						2	1.25	1.35	0.59						1.34	2.3	2.05	0.83						2.85	1.57	1.92	0.69						2.44	1.15	1.85	0.98						2.04	1.06	2.46	0.57
	1.34	0.71	1.46	1.76						2.33	1.16	1.48	1.3						5	0.14	1.1	1.03						1.54	0.6	1.93	0.96						1.75	0.67	1.91	0.86						2.5	1.57	1.84	0.78
	1.61	1.34	2.06	1.13						1.62	0.09	1.61	1.31						1.66	1.87	1.77	1						1.32	0.86	1.56	0.95						1.87	0.81	1.5	1.05						2.46	1.55	2.85	1.52
	1.42	1.56	1.49	0.48						2.67	1.85	1.34	0.5						1.69	0.92	1.72	1.34						2.31	1.48	2.41	1.17						1.91	0.67	1.82	0.92						1.44	2.17	2.13	0.66
	1.52	1.49	1.74	1.58						1.67	1.17	1.26	0.58						1.54	0.26	2.59	1.24						1.54	1.03	2.74	0.94						2.68	1.11	2.38	1.79						2.03	0.14	2.01	1.04
	1.58	1.14	1.72	0.86						1.85	0.5	1.04	0.99						1.18	1.85	1.85	1.18						1.29	1.1	1.1	0.73						1.88	1.51	1.96	0.96						2.38	1.49	2.03	0.84
	2.14	0.42	1.14	1.25						1.33	1.38	1.3	1.33						2.41	1.74	2.17	1.21						3.06	0.53	1.93	0.8						1.67	1.71	1.3	1.06						2.01	0.24	2.15	0.61
	2.28	0.3	1.48	1.84						1.31	1.25	1.9	1.47						1.82	1.4	3.65	1.16						1.6	1.5	2.92	0.59						2.52	1.42	2.88	1.36						1.99	1.53	1.87	1.26
	1.26	0.44	2.15	0.78						1.51	0.7	1.14	1.13						1.62	0.6	1.76	1.08						1.34	0.57	1.79	0.74						0.98	1.11	1.79	1.31						2.4	1.22	2.28	1.12
	5.73	1.32	1.62	1.86						1.39	1.02	1.51	0.57						2.55	1.19	1.24	0.32						1.23	0.93	1.47	1.3						1.44	0.15	2.13	0.69						1.87	0.24	1.54	0.98
	1.58	1.2	1.62	1.73						1.58	1.04	1.66	0.95						1.23	1.08	1.04	0.73						1.72	1.31	1.81	0.89						1.45	0.35	1.33	0.88						1.48	1.88	2.51	0.22
	2.03	0.82	1.95	0.87						1.52	0.83	2.56	0.94						2.02	1.54	2.7	1.16						1.38	1.3	2.3	0.7						2.54	0.33	2.46	0.49						2.54	1.7	2.03	1.23
	1.36	1.58	1.47	0.93						1.9	0.71	1.71	0.96						1.09	1.89	1.77	1.15						1.81	1.18	2.8	0.74						2.06	1.05	2.31	0.92						1.42	0.47	2.21	1.02
	1.45	1.7	1.37	0.76						1.39	0.59	1.81	1.14						2.05	0.95	1.61	1.16						2.19	1.25	1.99	0.53						2.22	1.4	1.69	0.9						2.19	2.21	1.78	1.39
	1.67	1.06	1.41	1.45						2.17	0.14	1.87	1.18						1.26	0.87	1.36	0.91						2.39	1.76	1.74	1.22						2.21	0.99	2.34	1.03						2.01	0.72	1.72	0.86
	2.02	0.51	1.73	1.48						1.4	0.34	2	0.34						1.33	1.29	1.45	1.48						1.26	0.28	2.16	0.72						1.35	0.38	1.68	1.77						2.3	0.93	1.83	0.37
	3.28	2.24	1.65	0.72						1.99	0.33	1.93	0.73						1.78	0.36	1.56	0.86						1.33	1.1	1.57	1.22						1.71	1.28	2.54	0.98						2.13	1.22	2.06	0.93
	3.3	0.51	1.46	1.5						1.74	0.27	1.63	1.36						1.75	2.03	2	0.74						1.45	0.35	2.41	0.8						2.21	1.06	1.8	1.32						1.74	1.06	2.14	0.81
	2.89	1.08	2.36	0.65						1.34	1.93	1.4	1.12						1.76	1.11	1.88	1.67						1.31	1.74	1.79	1.06						2.19	0.93	2.57	1.21						2.36	1.33	2.35	1.11
	1.43	1.72	2.24	0.95						2.1	0.2	1.48	0.89						1.58	0.44	1.36	1.08						1.64	0.2	1.34	0.98						2.16	1.25	1.75	1.36						1.84	1.34	1.86	0.8
	1.23	1.01	1.92	0.99						1.35	0.94	1.87	0.94						1.5	0.22	1.73	0.4						1.34	1.38	1.63	1.16						1.4	0.37	2.29	0.82						2.32	1.29	2.98	1.14
	1.22	1.5	1.91	1.39						1.56	0.84	1.35	0.64						1.25	1.11	1.8	0.96						2.03	1.33	1.9	0.71						1.94	1.29	2.44	1.04						2.62	0.91	1.91	0.76
	2.36	1.1	1.56	2.03						1.47	1	1.56	1.07						1.06	1.79	2.21	0.92						1.49	2.57	2.64	0.79						1.71	1.53	1.4	1.19						2.34	1.66	3.02	0.89
	1.43	1.65	1.46	1.21						1.69	1.12	1.46	1.09						1.32	1.66	1.57	1.35						1.86	1.57	1.98	0.98						1.83	0.72	2.16	1.14						1.76	0.17	1.62	0.7
	1.12	0.81	1.7	0.79						1.37	1.23	2.26	0.8						1.21	1.84	1.72	0.99						2.07	0.99	1.81	1.34						1.29	0.79	2.23	1.22						2.06	1.59	2.42	0.78
	1.75	0.71	1.8	1.09						1.6	1.3	1.45	1.59						2.69	1.28	2.27	1.06						1.4	0.77	1.93	0.74						1.84	0.49	1.67	0.48						2.32	0.94	1.78	1.09
	1.52	1.44	1.54	1.08						1.72	1.03	1.78	1.03						1.62	0.72	1.14	0.81						1.3	0.89	2.38	0.92						1.96	1.02	1.84	0.99						1.92	0.93	2.32	0.92
	1.13	1.7	1.38	0.75						1.48	1.17	1.6	0.9						1.71	0.78	1.48	1.24						1.89	1.26	1.75	1.08						2.08	1.12	2.9	1.14						2.72	1.5	1.28	1.57
	1.03	1.88	1.31	1.01						1.79	1.46	1.39	1.28						2.09	0.65	1.31	0.92						1.87	1.08	1.21	1.33						1.7	0.92	1.6	0.54						3.5	0.39	2.12	2.28
	1.06	1.1	1.93	1.4						1.95	0.73	1.72	1.31						1.73	1.08	1.24	1.17						2.55	1.35	2.08	0.98						2.22	0.78	1.5	0.95						3.37	0.63	2.18	0.8
	1.62	1.08	1.76	0.81						1.26	1.28	1.68	0.67						1.11	1.73	1.84	0.98						1.3	0.94	1.17	0.72						2.61	1.08	2.29	0.91						1.27	0.27	2.1	1.03
	1.38	1.14	1.83	2						2.15	0.17	1.73	1.24						1.82	1.78	2.3	0.61						2.16	1.26	1.47	0.77						1.29	0.24	1.82	0.85						2.38	0.56	2.34	1.33
	1.35	1.48	1.81	1.04						1.56	0.9	1.76	0.85						1.33	1.02	1.17	1.1						1.42	1.31	1.88	0.7						2.07	1.27	1.75	1.14						1.16	0.66	2.11	0.88
	1.99	0.93	2.79	0.85						1.76	0.21	1.87	1.02						1.82	0.41	1.37	1.54						1.21	0.96	2.18	0.8						3.03	0.17	2.1	1.35						1.08	1.32	2.21	1.42
	1.63	1.06	3.72	1.13						1.08	1.27	2.08	1.43						1.26	1.1	1.98	1.48						1.62	0.78	1.27	0.93						2.12	2.29	1.09	1.1						1.78	0.21	2.41	0.92
	1.35	1.19	2.25	0.82						1.23	1.5	1.53	1.06						1.15	0.54	1.06	0.49						2.45	1.39	1.14	0.94						1.99	1.46	2.71	0.67						1.93	1.71	3.16	1.21
	1.41	1.55	1.58	0.98						1.43	0.35	2.16	1.13						2.02	1.84	2.9	0.92						1.34	0.71	1.42	0.49						1.49	0.22	1.94	0.95						1.85	0.61	2.2	1.1
	2.22	0.43	3.07	0.79						1.79	0.27	1.73	0.66						1.48	1.12	2.22	0.49						1.33	1.54	3.31	0.96						2.6	0.78	1.24	1.7						1.28	0.36	1.67	1.94
	1.56	0.68	1.44	0.61						1.53	0.19	1.89	0.8						1.68	0.34	1.79	0.72						1.69	1.43	1.24	0.64						1.81	1.15	1.36	0.71						1.38	0.2	3.48	1.3
	2.02	0.51	2.29	1.17						1.45	1.37	1.72	0.71						1.93	1.26	1.59	0.83						1.32	0.64	1.34	0.73						1.72	0.18	1.89	1.32						2.32	0.51	1.55	1.38
	1.62	1.35	1.57	0.85						1.77	0.46	1.49	0.86						1.81	0.61	1.69	0.98						2.53	0.95	1.65	0.83						2.02	1.12	2.48	1.38						2.96	1.07	1.94	1.39
	1.92	0.71	0.9	1.68						1.52	1.33	1.83	0.64						1.38	1.03	1.83	0.97						1.33	0.55	2.07	1.03						1.89	1.68	2.99	1.29						2.69	1.29	1.65	1.07
	1.84	0.24	1.8	1.06						2.07	1.39	1.21	0.63						2	0.96	1.51	1.39						1.93	1.24	1.8	0.66						2.09	1.02	1.21	0.83						1.78	1.64	2.11	0.66
	3.7	1.19	3.41	0.97						1.12	0.56	1.58	2.06						1.69	0.33	1.23	0.66						1.31	0.21	1.78	0.89						1.35	0.64	2.16	1.9						2.35	0.83	2.92	0.89
	3.02	1.04	1.92	0.71						1.93	1.3	1.96	0.77						1.26	1.85	1.83	1.36						1.37	0.54	1.77	0.84						2.33	1.47	2.06	0.65						2.25	1.69	2.68	1.51
	1.46	1.27	1.42	0.87						1.32	1.21	1.7	1.1						1.46	1.73	3.03	1.79						1.4	0.89	2.52	0.58						1.84	1.14	1.35	0.86						2.88	1.87	1.92	0.8
	2.09	1.04	2.02	0.87						2.26	1.13	1.12	1.15						1.36	1.12	1.79	0.79						1.53	0.85	1.38	0.95						2.62	1.02	2.48	1.3						1.79	1.37	2.39	1.08
	1.62	0.81	1.99	0.72						1.36	0.97	2.08	0.72						1.86	0.91	1.08	0.96						2.09	0.96	1.9	0.67						2.13	1.81	2.11	1.1						2.3	1.1	2.02	0.92
	2.01	0.74	1.72	0.63						2.18	1.35	1.42	0.86						1.97	1.36	1.64	0.65						1.38	1.36	1.64	0.76						1.4	0.82	2.69	0.69						2.03	0.26	1.65	1.46
	1.86	0.61	1.81	1.04						2.13	0.84	1.96	0.63						1.37	0.87	1.61	1.2						1.7	0.35	2.14	1.47						2.56	0.94	1.69	0.68						1.7	0.25	2.57	1.31
	1.68	0.28	1.87	1.35						1.94	0.35	1.45	0.85						1.54	1.48	1.95	1.27						1.63	0.13	1.69	1.02						1.89	1.41	2.04	0.83						2.17	1	2.15	1.11
	1.89	0.67	1.35	0.92						2.11	1.24	1.08	0.92						1.65	1.22	1.34	1.32						1.71	0.52	1.98	0.98						1.85	1.16	1.24	1.6						2.97	0.7	2.54	0.79
	1.45	1.28	1.83	0.74						1.59	1.12	1.63	1.41						1.13	0.82	1.24	0.8						2.21	1.11	1.23	0.5						1.28	1.34	1.31	1.07						1.34	0.52	2.57	1.49
	1.41	1.66	1.24	1.16						2.12	0.23	1.34	1.69						2	0.3	1.6	1.06						2.11	1.41	1.56	0.82						2.31	0.72	1.66	2.97						4.14	1.66	1.82	1.19
	2.42	1.31	1.77	1.42						1.66	0.21	1.43	0.71						0.94	1.85	2.24	0.79						1.73	1.39	2.01	1.2						1.51	0.46	1.99	1.24						1.82	0.69	1.76	1.29
	1.96	0.88	2.33	0.88						2.07	2.07	1.13	0.58						1.42	1.25	2.01	0.94						1.8	1.04	1.85	0.82						2.01	1.25	2.25	1.37						2.06	1.72	1.57	0.96
	1.41	0.74	2.12	0.79						1.39	1.16	2.32	0.75						2.07	0.41	1.29	0.9						2.32	1.69	2.02	0.7						2.12	1.16	1.55	0.83						3.03	0.7	1.64	0.97
	2.15	0.76	1.56	1.03						1.52	0.44	1.96	0.87						1.73	0.18	1.16	0.65						2.06	0.66	3	0.9						1.5	0.74	1.83	0.88						2.22	1.35	2.62	1.02
	1.41	1.3	2.18	0.05						1.7	0.61	1.44	0.9						1.45	0.81	1.47	0.78						1.38	0.18	2.37	0.95						2.26	1.12	1.44	0.91						1.58	0.64	2.01	0.76
	1.44	0.78	1.48	0.87						1.28	0.49	1.43	0.75						1.49	0.79	1.9	1.18						2.57	2.06	1.8	1.03						1.5	1.29	1.64	0.98						1.5	0.48	1.82	1.51
	1.6	1.96	1.69	1.48						1.53	0.41	1.29	0.75						1.93	0.95	1.26	0.8						1.57	0.34	1.66	1.06						1.76	1.63	1.31	0.71						1.9	1.41	1.5	0.83
	2.15	0.78	1.82	0.78						1.45	0.74	1.88	0.95						1.46	1.87	1.08	1.06						1.73	0.3	1.44	1.09						1.3	0.57	1.71	0.85						1.74	1.07	2.6	0.87
	1.83	1.45	1.11	0.88						2.19	0.6	1.63	1.47						1.99	1.78	1.71	0.99						1.53	1.17	2.4	1.12						2.35	1.57	1.69	1.02						2.19	1.18	2.53	0.87
	1.77	1.16	1.55	0.69						1.5	1.34	2.65	0.98						2.32	1.18	2.75	1.09						1.72	0.69	1.67	0.85						1.91	1.22	1.45	0.96						1.39	0.23	2.82	1.12
	2.36	1.18	1.6	1.51						1.46	0.44	2.19	0.62						2.11	0.41	2.25	1.33						1.39	1.41	1.26	1.34						1.96	1.38	1.45	1.46						1.82	0.9	1.72	1.21
	1.59	0.96	2.24	1.1						1.43	1.4	1.17	0.63						2.01	1.03	2.03	1.38						2.17	1.74	1.36	1.23						0.92	2.01	1.91	0.7						2.71	0.41	2.79	1.16
	1.81	0.44	1.62	0.74						1.51	0.99	2.22	0.71						1.57	1.53	1.53	0.72						1.7	0.56	1.66	1.42						2.16	2.09	1.74	0.96						3.39	0.6	1.79	1.3
	1.96	1.71	1.28	1.64						1.57	1.05	2.94	1						1.41	1.02	1.28	1.09						1.32	0.83	2.14	1.19						2.33	1.17	1.84	1.1						1.51	0.46	1.65	1.52
	2.32	1.08	2.04	0.76						1.96	0.53	1.88	0.99						1.22	1.36	1.27	0.9						1.09	1.17	2.62	1.39						1.86	0.87	1.64	0.94						1.79	1.74	1.75	0.68
	2.09	1.2	1.99	1.02						1.34	1.06	1.34	1.13						1.15	2.61	1.59	0.69						2.08	1	1.24	1.17						1.75	1.53	1.48	1.77						2.46	1.81	1.99	1.73
	1.67	0.51	1.78	1.48						1.13	1.04	1.38	1.55						1.7	0.74	1.39	1.19						1.52	0.9	2.41	1.52						1.58	1.38	1.68	0.77						0.91	0.73	1.77	2.2
	1.97	0.98	1.57	1.34						2.28	0.42	2.13	0.92						0.94	3.68	1.46	0.9						1.58	0.3	1.94	0.63						1.81	0.45	2	0.64						1.37	0.18	2.42	1.59
	2.29	1.02	2.05	1.16						1.14	1.12	1.74	1.04						1.48	1.16	1.53	1.02						1.73	0.19	2.09	1.5						1.75	0.56	2.09	0.99						2.07	1.75	1.81	1.77
	1.68	0.98	1.82	0.91						1.13	0.86	1.5	0.51						5.36	1.2	1.63	1.48						1.32	0.7	1.19	1.59						2.29	2	1.93	0.59						3.68	1.39	1.78	1.28
	1.33	1.33	2.3	0.8						1.66	0.63	1.42	1.56						1.23	0.69	1.81	0.72						1.57	1.59	1.69	0.62						1.52	0.26	2.01	0.74						1.79	0.21	1.79	0.63
	1.85	0.65	2.01	1.4						1.99	1.03	1.48	0.76						1.54	1.92	2.32	0.93						2.46	1.97	1.42	0.86						2.22	0.73	1.27	1.05						2.12	1.22	1.92	0.81
	1	1.13	1.75	1.11						1.82	0.94	1.68	0.8						1.77	0.96	1.68	0.68						1.25	0.94	1.93	0.94						1.57	0.13	2.24	1.25						1.54	0.32	2.08	0.7
	3.56	0.06	1.62	1.25						1.49	2.08	1.52	1.24						1.34	1.4	2.15	1.04						2.08	1.03	4.71	0.97						1.37	0.65	1.49	0.45						1.28	0.47	2.12	0.73
	1.7	1.17	1.89	0.81						1.92	0.77	1.75	0.63						1.29	1.46	1.92	1.2						2.38	1.48	2.61	0.73						1.17	0.56	4.88	0.92						1.98	0.66	2.63	0.93
	2.09	1.14	2.34	0.97						1.88	0.84	2.1	0.91						2.39	1.29	1.87	0.68						1.57	1.1	2.41	0.99						1.4	0.14	1.68	0.82						1.56	0.39	2.52	1.3
	1.54	1.51	1.75	1.03						3.68	0.97	1.31	0.89						1.48	0.88	2.04	0.96						1.76	1.13	1.64	0.96						1.6	1.8	2.37	1.27						1.79	1.43	1.75	0.97
	1.71	0.71	1.7	0.55						1.48	1.36	1.26	0.95						2.03	0.77	1.16	0.79						1.34	1	1.56	0.73						1.62	0.97	1.31	0.95						2.07	0.96	2.01	1.04
	1.71	1.73	2.17	1						1.76	1.57	1.69	0.83						1.83	0.33	0.92	0.84						1.21	1.14	1.72	1.32						1.42	0.56	1.58	1.05						1.93	1.1	2.5	1.25
	1.69	1.03	1.89	1.12						1.7	0.85	1.97	1.17						1.5	0.71	1.21	1.14						1.42	0.51	1.96	1.52						2.11	1.12	2.5	0.84						2.16	1.45	2.03	1.4
	1.73	0.67	2.42	1.25						1.6	0.42	1	0.97						1.69	1.06	1.97	1.74						1.97	0.95	1.6	0.8						1.46	0.23	2	0.85						2.13	0.75	2.65	0.98
	1.49	0.61	1.62	0.5						1.94	1.54	2.5	0.85						2.35	1.09	2.12	0.83						1.45	0.25	1.78	0.88						2.1	0.96	3.02	1.06						2.07	0.63	2.79	0.65
	1.75	0.36	1.8	1.1						1.16	1	1.58	1.42						1.67	1.27	2.05	0.97						1.25	1.71	1.63	0.87						2.19	1.55	1.75	1.5						1.32	1.03	2.12	0.86
	1.1	0.85	2.66	0.84						1.08	1.99	1.47	1.65						1.4	0.16	2.73	0.91						2.08	1.52	1.55	1.25						1.56	0.75	2.46	1.31						2.35	1.15	2.56	0.9
	1.57	1.45	2.09	1.19						1.61	1.19	1.92	0.47						1.46	1.71	1.42	1.01						1.3	0.93	2.28	0.77						1.24	0.97	2.71	0.94						1.77	0.25	2.03	0.32
	1.78	1.24	2.18	0.78						1.55	1.49	1.56	1.46						1.69	0.47	1.77	1.02						2.15	1.8	1.36	1						2.63	1.15	1.48	0.8						1.8	0.39	2.02	1.26
	1.93	0.63	1.82	1.1						1.19	0.89	1.18	0.75						1.44	0.22	2.26	0.66						2.1	0.58	1.98	1.08						2.83	0.9	1.17	1.31						2.27	0.25	2.8	1.15
	1.55	1.26	2.44	0.95						1.66	0.32	1.72	0.91						1.43	0.3	2.02	1.44						2.1	1.47	1.02	0.97						1.95	0.95	1.69	1.24						2.69	1.12	2.3	0.93
	1.8	1.59	1.57	0.96						1.49	1.09	1.76	1.72						1.77	0.9	2.28	0.57						2.08	1.09	1.84	0.76						2.51	0.96	1.36	1.01						2.32	0.8	1.73	0.24
	1.91	0.79	3.99	0.69						2.06	0.14	1.84	1.05						1.58	0.44	2.2	0.52						1.21	1.38	1.38	0.63						1.93	1.47	2	0.7						1.79	0.44	2.91	0.55
	1.98	0.61	3.21	1.24						2.03	1.23	1.34	1.22						1.01	1.63	1.76	1.14						1.78	0.89	2.37	0.77						1.61	1.23	1.4	1.17						2.09	0.48	1.67	0.92
	1.9	0.6	6.95	0.93						3.91	1.36	1.56	0.93						2	0.41	2.15	0.77						1.81	0.59	2.08	1.13						1.59	0.93	2.39	1						2.72	1.12	1.22	1.34
	1.64	1.06	1.79	0.92						1.42	0.21	1.62	1						1.62	0.83	5.67	0.87						1.53	1.11	1.23	0.58						1.51	0.16	1.77	0.91						1.62	0.74	4.01	1.21
	1.81	1.33	1.31	1.14						1.89	1.46	1.27	1.8						1.82	0.57	1.61	0.89						1.88	0.42	1.61	1.43						2.11	1.83	1.38	0.84						1.86	0.94	1.54	0.78
	1.26	2.05	1.45	0.65						1.22	2.01	3.94	0.81						1.84	1.36	1.98	0.7						2.29	1.47	1.45	1.03						1.56	0.58	1.85	0.99						2.06	0.67	4.43	1.4
	1.37	0.93	3.65	1.82						2.53	0.75	1.2	0.8						1.13	0.54	1.77	1.17						1.5	1.49	2.18	0.75						2.53	1.45	1.32	0.93						1.69	0.68	2.42	0.81
	1.65	0.57	1.43	1.11						1.3	0.87	1.5	0.8						1.95	0.35	1.49	1.05						1.92	1	1.46	1.51						2.55	1.36	1.67	1.07						2.22	0.92	2.29	0.69
	1.35	1.3	1.46	0.67						1.18	1.17	1.5	0.88						1.85	0.34	1.5	1.06						1.81	1.55	1.5	0.81						1.75	0.68	1.37	0.84						2.19	0.97	2.16	0.45
	0.99	0.4	1.14	0.76						1.28	1.79	2.2	0.62						2.36	1.72	1.55	1.19						1.45	0.39	2.24	0.44						2.82	0.29	1.58	0.53						2.35	1.39	1.61	1.16
	2.74	1.45	1.91	1.47						1.21	1.78	1.62	1.36						1.4	1.41	1.47	0.87						1.58	0.77	2.51	1.22						1.55	0.28	1.21	0.76						1.8	1.56	2.12	0.81
	1.54	1.5	1.74	0.94						1.4	0.59	1.3	1.1						2.28	0.9	1.68	1.78						1.82	0.88	1.31	0.54						1.82	1.36	1.45	1.03						2.46	1.76	2	0.46
	1.26	1.65	1.76	0.89						1.25	1.27	1.71	1.1						2.58	1.85	1.2	1.26						1.37	0.74	1.49	0.86						1.89	0.74	1.93	0.93						2.23	0.83	2.39	0.6
	2.06	0.4	2.3	1.66						1.52	0.56	1.38	1.03						1.72	1.1	1.8	0.94						1.32	0.79	2.7	0.67						2.41	1	2.13	1.1						1.8	1.29	2.39	1.51
	1.5	1.4	1.44	0.62						1.31	1.55	1.63	0.68						1.57	1.22	1.41	1.07						1.71	0.33	1.83	1.4						2.44	0.88	1.36	1.07						2.06	1.76	1.66	0.75
	1.52	1.12	1.68	0.71						1.64	0.3	1.19	0.61						1.26	0.79	1.64	0.6						1.41	0.49	2.1	1.04						1.95	0.98	1.78	1.33						3.29	1.02	1.51	0.66
	1.49	0.94	1.78	0.92						1.67	1.48	1.58	0.86						1.61	0.76	2.11	1.14						1.42	0.86	1.71	1.11						1.5	1.03	1.51	0.94						2.13	1.04	2.7	0.58
	1.74	0.66	1.04	0.95						1.66	0.98	1.76	0.37						1.82	0.3	2.05	0.49						2.51	1.37	1.71	0.74						2.05	1.32	1.3	0.81						2.28	1.59	1.54	1.77
	1.37	0.08	1.59	1.08						1.85	1.04	1.22	1.13						1.53	1.17	2	0.75						1.49	0.2	2.27	0.87						2.47	0.62	1.87	1.62						0.86	1.05	1.89	1.31
	1.54	1.36	0.98	0.97						1.98	0.3	1.43	1.14						1.75	0.94	2.41	0.93						2	1.26	2.02	0.79						2.1	1.35	2.46	1.01						1.58	1.02	2.31	0.7
	1.65	0.88	1.54	0.72						1.48	1.28	2.59	0.94						1.42	1.71	2.04	0.66						1.63	1.3	1.55	0.78						1.78	0.8	2.07	1.15						1.89	1.05	1.73	1.9
	1.66	1.15	1.88	0.92						1.4	2.08	1.66	0.54						3.56	0.6	2.49	0.94						1.88	0.43	2.02	0.73						2.44	1.22	2.01	1.16						2.55	0.86	1.24	1.29
	1.52	0.6	1.75	1.11						2.2	0.19	2.02	1.69						1.92	1.21	1.74	1.17						2.29	1.34	2.15	0.78						2.21	1.1	2.41	0.95						1.57	0.75	2.1	0.81
	1.64	1.56	1.71	1.17						4.79	1.68	1.39	0.59						1.55	2.13	1.76	0.74						2.29	0.66	1.37	1.56						1.62	1.22	1.53	0.97						1.75	1.08	2.59	1.63
	1.39	0.75	1.83	1.04						1.52	1.29	1.68	1.07						2.05	0.84	1.65	1.71						1.34	1.87	2.44	0.93						2.26	0.58	2.03	0.8						2.41	1.14	1.81	1.31
	1.5	1.37	1.79	1.22						2.08	0.42	1.55	1.58						1.19	0.81	1.72	1.06						2.01	1.35	2.72	0.96						2.78	0.84	1.8	1.34						1.94	1.74	1.53	1.88
	1.8	0.74	2.09	0.72						1.43	0.94	1.73	1.27						2.72	1.13	1.8	0.77						2.27	1.26	2.16	0.77						2.23	1.55	1.44	1.21						1.5	1.11	1.85	1.27
	1	0.97	1.65	0.94						1.56	1.28	1.55	0.94						1.85	1.68	1.73	1.17						2.03	1.2	2.61	1.42						2.47	0.82	1.88	1.22						1.22	0.65	1.68	1.9
	1.43	0.75	1.23	1.12						1.11	1.19	1.68	1.22						1.19	2.45	1.54	1.11						1.33	0.64	1.84	1.22						1.9	2.46	2.03	0.98						1.39	0.7	1.7	0.43
	1.88	1.04	2.17	0.58						1.68	1.56	2.34	1.36						1.17	1.77	1.2	0.98						1.66	0.21	1.71	0.71						1.98	1.16	1.46	1.46						1.72	1.25	2.36	0.84
	2.01	0.63	1.93	0.9						1.46	1.64	1.25	1.24						2.35	0.92	2.18	0.96						1.48	1.28	1.34	0.56						2.51	1.2	1.59	0.85						1.88	0.72	2.59	1.63
	1.36	1.44	2.1	1.11						1.46	1.92	1.39	1.17						1.48	1.54	1.53	1.02						1.99	1.13	1.55	1.04						1.69	1.01	1.67	1.28						1.16	2.12	2.66	0.65
	1.43	1.56	3.54	0.77						1.28	1.21	1.39	0.62						1.34	0.9	1.55	1.69						1.61	1.38	1.64	1.19						1.69	1.58	2.08	0.81						3.76	0.76	3.01	0.82
	1.64	0.81	1.76	0.96						1.85	0.31	1.26	1.19						1.98	0.88	1.59	0.6						1.48	1.49	1.81	0.73						2.23	1.2	1.8	0.75						2.22	1.88	1.88	0.67
	1.31	0.99	2.26	1.21						1.74	1.42	1.27	0.56						2.03	0.88	1.77	0.76						1.38	0.94	2.24	0.88						2.32	0.64	2.42	1.15						1.37	0.26	2.01	0.83
	5.03	0.93	2.65	0.85						1.64	1.34	1.44	1.04						1.38	1.36	2.12	0.84						1.44	0.89	1.52	1.33						2.14	1.1	2.29	1.25						1.45	1.22	2.3	1.79
	0.96	0.66	1.93	0.48						1.41	1.13	0.93	0.53						1.84	0.42	1.41	0.72						1.55	0.27	1.48	1.12						1.76	1.43	2.34	1.34						2.3	1.01	1.51	1.58
	1.16	1.64	2.08	1						2.29	1	1.2	1.81						1.59	1.44	2.32	1.01						1.12	0.82	1.15	0.54						1.7	0.25	3.13	0.96						1.43	0.33	1.88	0.58
	1.69	0.56	1.64	0.81						0.85	0.17	1.34	1.23						1.71	0.19	2.12	0.71						1.77	0.94	2.35	1.35						1.53	0.5	2.29	1.22						1.45	0.51	1.89	0.05
	1.39	1.17	2.02	1.08						1.74	1.06	1.45	0.97						1.7	1.14	1.02	1.02						1	0.33	2.09	0.68						3.42	0.87	1.39	1.21						1.99	0.86	1.98	1.63
	1.82	1.16	1.97	1.04						1.24	0.47	1.87	0.6						1.51	0.76	2.24	0.89						1.01	0.92	1.88	0.57						1.97	1.19	2.95	0.56						2.65	0.71	1.98	0.82
	1.56	1.08	1.79	1.31						1.47	1.34	1.63	1.23						1.45	1.1	2.11	0.91						1.06	0.31	1.37	1.14						1.69	1.27	2.01	0.77						2.51	1.04	2.04	0.36
	1.59	1.31	1.7	0.64						1.73	0.75	1.71	0.81						1.5	0.77	1.88	0.9						1.53	0.62	1.94	1.06						1.59	2.45	2.14	0.98						1.36	0.34	2.85	0.62
	2.29	1.41	2.33	1.48						2.02	1.08	1.22	1.04						2.21	1.49	1.53	1.23						1.87	0.21	1.47	1.08						1.65	1.23	3.57	1.37						2.17	0.59	2.62	0.88
	1.77	0.67	2.25	0.9						1.24	1.32	1.38	0.7						1.58	0.82	1.18	0.68						1.03	0.71	2.39	0.72						2.12	1.4	1.62	0.71						2.1	1.01	1.81	1.04
	1.76	0.62	1.61	1.14						1.42	1.01	1.1	0.73						1.75	0.41	1.85	1.1						1.05	1.15	1.95	1.38						1.92	1.52	1.98	0.96						1.83	0.86	2.06	1.22
	1.25	1.17	2.01	1.08						2.08	1.12	1.94	0.59						1.91	0.29	1.63	1.11						1.54	0.48	1.33	0.61						1.32	0.14	1.81	0.9						3.02	1.01	2.35	1.29
	1.22	1.29	1.68	0.66						1.27	1.04	2.42	0.74						1.74	0.27	1.82	1.26						1.65	0.42	1.8	1.16						1.9	1.04	2.3	0.87						1.72	0.4	2.24	0.51
	1.61	0.83	1.25	1.1						1.42	1.3	1.72	0.82						1.45	0.68	1.21	1.29						1.43	0.38	2.01	1.01						1.86	1.69	1.62	0.8						2.16	1.14	1.92	0.28
	2.02	0.37	1.01	0.81						1.53	1.1	1.03	1.24						1.96	0.28	1.84	0.86						1.99	1.34	2.13	0.77						1.68	0.4	1.42	0.95						1.75	0.86	2.11	0.87
	1.69	0.98	1.61	1.18						1.11	1.76	0.94	0.56						1.43	1.18	2.32	1.26						1.57	1.02	2.19	0.81						1.99	1.11	2.64	1.07						1.54	0.92	1.13	1.34
	1.06	0.72	1.18	0.84						1.26	1.96	2.21	1.13						1.52	1.39	1.56	0.62						2	1.6	1.8	1.09						2.1	0.98	1.94	0.62						1.76	0.3	2.16	0.65
	1.74	0.27	2.18	0.99						2.04	1.14	1.01	0.84						1.96	0.58	1.94	1.1						1.5	1.69	2.17	0.83						2.84	1.2	1.43	1.29						1.62	1	1.96	1.03
	1.42	1.24	1.8	1.08						1.1	1.43	2.03	1.1						1.68	1	1.52	0.79						1.67	1.81	1.62	1						2.12	1.23	2.56	1.39						2.2	1.11	1.7	1.32
	1.49	1.39	1.44	1.64						1.72	1.46	1.98	1.82						1.2	0.58	3.83	1.11						1.24	0.6	1.34	0.83						1.34	1.45	2.7	1.16						2.05	0.77	2.38	0.87
	1.62	1.07	2.24	1.03						1.05	3.2	1.81	0.87						1.45	0.86	1.92	2.11						1.09	1.47	2.19	0.59						2.31	1.58	1.48	1.07						3.39	0.09	1.61	1.18
	1.99	0.59	1.99	1.7						1.25	1.01	2.34	1.21						1.25	1.36	2.09	0.71						1.91	1.45	2.65	0.71						1.46	0.67	2.02	0.84						2.44	0.91	2.69	0.92
	2.4	0.84	1.38	1.21						2.1	0.09	2.56	0.6						1.98	0.97	1.96	1.07						1.95	1.46	1.24	1.44						1.62	1.19	2.04	1.14						1.77	1	2.28	1.96
	1.93	1.1	1.34	1.25						1.18	1.39	1.74	1.05						1.7	1.18	1.3	0.83						1.45	0.2	1.58	0.66						3	0.26	1.62	0.76						2	0.17	1.72	1.16
	1.96	0.52	1.79	0.78						1.17	1.45	1.68	0.9						1.39	0.84	1.11	0.69						1.13	1.2	2.12	0.98						1.63	0.19	1.82	1.48						2.13	1.97	3.67	0.59
	1.33	1.23	4.91	1.41						1.1	0.92	1.98	0.82						1.46	0.69	1.77	1.1						2.23	1.65	1.24	0.73						2.51	0.55	1.66	1.32						2.17	1.9	1.33	1.45
	1.77	1.15	3.37	0.9						1.97	0.3	4.88	1.16						1.23	1.47	1.89	0.8						1.57	0.72	1.55	1.46						1.92	1.44	2.02	0.73						2.97	0.26	1.42	1.07
	1.21	1.14	1.73	1.1						1.11	1.97	1.27	1.75						1.35	0.86	2.03	0.92						1.43	0.54	2.31	0.97						2.07	0.75	2.63	0.84						2.75	0.7	2.09	2.01
	1.23	1.15	1.74	1.25						1.88	0.26	1.06	0.49						1.78	0.29	3.24	1.31						1.95	0.99	1.42	0.98						1.19	0.34	1.4	1.09						2.78	2.07	1.86	1.3
	1.63	1.3	0.94	0.91						1.23	1.46	1.9	0.7						2.71	0.37	1.37	0.79						1.61	1.63	1.4	1.58						1.83	1.61	1.63	1.38						2.04	1.48	1.5	1.53
	1.41	1.34	1.25	0.77						1.3	1.32	1.37	1.6						1.46	0.53	1.28	0.68						3.17	0.73	1.94	1.39						1.45	0.18	1.69	1.42						1.94	1.13	2.14	0.55
	1.38	1.77	2.18	0.66						1.5	0.18	1.38	1.7						1.45	1.2	1.8	0.58						1.84	2.2	2.01	0.86						2.52	1	1.88	1.32						1.67	1.24	2.22	0.96
	1.44	0.85	1.76	0.89						1.91	1.19	1.24	1.16						1.88	1.03	2.19	1.28						2.46	1.69	3.21	0.81						2.16	0.42	2.77	1.51						3.76	0.64	1.69	1
	1.61	1.64	1.77	0.62						1.81	0.26	1.71	1.02						1.52	0.59	1.79	1.12						2.57	1.11	1.63	0.77						1.29	0.61	1.33	0.75						3.63	0.56	1.39	0.65
	1.78	0.49	1.95	0.74						1.35	1.83	1.87	1.22						2.23	1.2	6.02	1.25						2.04	1.75	1.74	0.77						1.45	0.4	1.4	0.88						0.98	2.2	1.92	0.93
	1.5	1.1	1.35	1.82						1.87	0.91	1.93	1.35						2.3	0.97	1.59	1.09						2	1.18	1.43	1.48						2.12	1.21	1.36	0.88						2.18	1.02	1.54	1.27
	1.41	1.29	2.21	1.08						1.37	0.97	1.67	1.15						1.29	0.89	1.5	0.48						1.77	0.23	2.35	1.27						1.7	1.91	2.25	0.79						2.03	0.71	2.26	1.05
	1.71	0.25	1.33	0.55						1.75	1.13	1.47	1.71						1.7	0.43	2.02	0.97						2.54	1.07	1.38	1.03						1.74	1.26	2.04	0.68						2.28	0.96	2.32	1.01
	1.14	0.36	1.23	1						1.62	0.45	1.34	0.78						1.11	1.67	2.02	1.46						1.33	1.08	1.91	1.12						2.2	0.99	1.66	0.98						1.49	0.2	1.96	1.2
	1.71	1.5	1.8	1.22						2.79	1.32	1.55	0.78						1.46	0.96	1.17	1.01						2	0.85	1.71	1.05						1.69	1.14	2.39	1.16						2.27	1.72	1.82	1.38
	1.51	1.19	1.29	0.83						1.89	1.1	1.74	1.22						1.52	1.41	1.66	0.94						1.57	0.22	1.52	0.99						1.97	1.3	1.86	1.17						1.98	1.61	1.51	1.93
	1.26	1.37	1.37	1.06						2.01	1.04	1.48	1.38						1.34	1.29	1.96	1.05						1.52	0.33	1.31	1.04						1.88	1.09	2.63	1.07						1.94	1.04	2.37	1.03
	1.6	0.99	1.48	0.68						1.54	0.93	2.29	1.22						1.38	1.43	1.62	1.26						2.24	0.71	2.77	1.5						2.08	1.47	1.94	1.04						2.41	0.44	2.57	0.83
	1.6	1.04	1.68	1.44						1.67	1.35	1.94	1.22						1.39	0.24	1.4	0.7						1.54	0.66	2.14	0.74						2.67	0.34	2.4	1.09						2.86	1.37	4.11	1.31
	1.93	0.98	1.36	0.88						1.7	1.43	1.58	0.97						1.27	1.78	1.92	1.24						1.44	0.14	2.39	1.17						1.38	0.86	2.91	1.36						2.92	0.97	1.7	1.5
	2.26	0.31	1.49	0.81						1.85	0.61	1.48	0.76						1.19	1.17	1.69	1.52						1.21	1.19	1.85	0.86						2.35	0.79	1.53	1.08						1.65	0.74	2.45	0.8
	1.88	0.44	1.34	1.19						1.63	1.11	1.34	0.8						1.7	0.66	1.79	1.27						1.52	0.49	2.95	1.1						1.83	0.89	1.16	1.74						1.8	1.86	2.69	0.82
	1.84	0.42	1.31	0.83						1.65	0.74	1.47	1.1						1.58	0.68	2.5	0.84						1.45	1.4	2.46	0.72						2.12	1.05	1.69	1.43						1.64	0.26	2.06	1.01
	1.19	0.92	1.45	0.77						1.61	0.37	1.59	1.43						2.23	1.91	1.87	1.23						2.02	1.65	1.83	1.11						1.61	1.14	2.13	0.67						1.6	0.26	1.44	1.24
	1.59	1.42	1.11	0.79						1.45	1.48	1.58	0.56						1.35	0.75	1.45	0.77						2.5	1.24	1.85	0.91						2.85	1.36	1.97	0.99						1.96	0.93	2.14	1.05
	1.39	1.58	1.15	1						2.18	1.83	1.49	0.75						1.69	1.16	2.12	0.77						1.69	2.28	1.4	0.91						1.76	1.18	1.73	1.49						2.02	0.34	1.39	0.63
	1.66	1.51	2.04	1.09						3.92	0.26	2.09	0.6						1.56	0.6	1.19	0.95						1.7	1.82	1.84	0.85						2.03	1.73	1.76	0.84						1.83	1.49	2.77	0.97
	1.41	1.32	1.65	0.46						3.15	0.68	0.97	1.17						1.35	0.6	1.6	0.7						2.07	1.28	2	0.61						2.09	0.72	1.23	0.68						2.26	1.19	1.84	1.03
	1.94	0.39	1.71	0.78						1.53	0.46	0.97	1.53						1.46	0.27	1.47	1.38						1.88	1.75	2.42	0.76						1.78	1.15	1.97	1.17						2.5	1	2.32	1.11
	1.47	1.64	2.13	0.88						1.12	0.79	1.42	0.64						1.47	0.89	1.48	0.95						2.69	1.15	1.82	1.33						2.44	0.65	2.13	0.99						2.55	1.43	2.15	1.44
	2.15	0.48	1.18	0.51						1.89	1.15	1.76	0.79						2.62	2.15	1.54	0.95						1.95	1.35	2.77	1.67						1.78	0.61	1.73	0.96						2.39	0.6	1.8	1.25
	1.18	0.31	1.63	1.63						2.06	0.99	1.13	1.1						1.37	0.5	2.2	1.7						1.54	1.03	1.74	0.99						1.85	1.15	1.34	1.12						2.77	0.56	1.53	0.96
	1.59	1.05	2.22	1.21						1.44	1.33	1.32	0.9						1.74	0.33	1.31	0.86						2.37	1.18	1.75	0.54						1.99	1.17	3.2	1.04						1.89	0.5	1.91	0.98
	1.63	0.9	1.51	0.89						1.6	1.21	1.81	1.38						1.42	0.48	1.23	0.86						2.42	1.21	1.63	1.87						1.53	0.4	2.03	0.85						1.93	0.87	3.23	0.81
	1.63	1	2.24	1.1						2.02	1.15	1.07	0.55						1.12	1.8	1.74	1.04						1.28	1.75	1.9	1.07						2.21	1.15	1.51	0.75						2.46	0.82	2.41	1.01
	1.45	0.86	1.41	0.8						1.08	0.77	1.35	0.77						2.04	0.58	1.56	1.19						2.26	1.99	1.99	0.61						2.21	2.05	1.63	0.99						1.48	1	2.03	1.25
	0.94	0.6	2.03	0.81						1.8	0.22	1.35	0.96						1.65	0.52	1.11	0.7						2.13	1.12	2.38	0.79						2.29	1.03	1.81	1.27						1.91	1.31	2.26	0.97
	1.6	1.07	1.31	1.15						1.26	1.66	0.97	1.1						2.43	1.08	2.08	1.04						2.14	1.12	1.77	0.78						2.43	1.36	2.16	0.91						1.87	1.36	2.29	0.79
	1.33	1.57	2.25	1.22						1.23	1.07	2.36	1.19						1.74	1	1.19	0.7						1.59	0.17	1.83	0.72						1.51	0.76	2.15	0.7						1.81	0.87	2.33	1.45
	2.19	0.27	1.67	0.97						1.24	1.02	1.84	1.41						1.98	1.03	2.04	1.17						1.44	1.23	1.61	0.5						2.18	1.6	2.26	1.73						1.49	1.06	1.68	1.23
	0.96	0.64	1.42	1.14						1.91	0.84	1.34	0.78						3.17	1.12	1.56	0.61						2.2	1.22	2.26	0.96						1.41	0.7	2.29	1.27						1.63	0.52	2.55	1.17
	1.14	1.26	2.68	1.03						1.16	1.4	1.44	1.41						2.5	1.23	1.3	0.73						0.89	0.68	2.47	1						2.03	1.82	1.49	1.19						1.48	1.03	1.87	1.26
	1.59	0.85	2.09	1.41						1.04	1.53	1.47	1.87						1.6	0.8	1.8	1.67						2.32	1.63	2.05	0.7						2.48	0.31	2.34	0.55						1.52	0.52	2.87	1.32
	1.45	0.86	1.54	1.25						1.6	0.42	3.06	1.72						2.19	0.56	2.06	1.25						1.88	1.5	1.66	1.34						1.89	1.07	2.96	1.22						1.62	1.26	2.23	0.89
	1.49	1.18	1.49	0.96						1.39	0.94	1.38	0.62						1.8	1.65	1.54	0.84						2.11	0.18	1.88	1.38						2.1	1.73	2.48	0.86						2.21	1.28	1.63	0.88
	1.26	1.15	3.37	0.92						0.94	1.38	1.35	0.8						2.25	0.91	1.29	1.23						1.26	0.43	1.75	0.67						1.99	1.68	2.65	0.32						2.57	1.11	2.58	1.14
	1.9	1.59	1.81	1.05						1.86	1.11	1.28	1.59						1.79	0.63	1.51	1.39						1.67	0.34	2.08	0.99						1.59	0.17	1.8	0.73						1.59	0.22	2.15	1.28
	1.23	1.59	1.92	0.99						1.29	1.12	1.13	0.7						1.91	1.36	2.29	0.83						1.95	0.82	1.62	0.97						2.25	1.44	1.68	0.79						2.26	0.87	1.36	1.01
	1.56	1.14	2.07	0.85						1.09	0.69	1.79	1.23						1.76	1.54	1.87	0.48						1.32	1.28	2.03	0.53						1.61	1.31	1.86	0.82						1.87	2	1.86	0.97
	1.72	0.77	1.25	0.91						1.42	1.37	1.42	1.16						1.48	1.59	1.37	1.6						1.68	0.65	1.84	0.78						1.24	0.79	1.84	0.43						3.39	0.06	1.96	1.57
	1.33	1.79	1.35	0.71						1.77	0.68	1.25	0.5						1.33	1.89	2.01	0.76						2	1.54	1.64	1.11						2.25	1.18	1.02	0.69						1.67	1.07	3.08	1.06
	1.73	0.79	1.29	1.41						1.15	1.45	1.85	1.22						1.84	0.48	2.5	0.95						1.84	0.38	1.58	0.83						2.08	1.81	2.14	0.8						2.28	1.85	3.09	0.55
	1.59	0.56	2.19	1.89						1.4	0.96	1.13	0.71						1.1	1.22	2.03	0.61						2.01	1.72	1.41	1.33						1.86	1.14	2	0.75						1.53	0.68	2.59	1.21
	2.94	1.31	1.35	1.15						2.1	1.18	1.96	1.3						1.49	1.12	1.51	1.25						2.52	1.35	2.25	0.88						1.7	0.28	1.78	1.04						2.65	0.56	2.18	1.56
	1.54	1.23	2.23	0.91						1.48	0.78	1.72	0.91						1.68	1.42	1.7	0.91						1.46	0.96	2.17	0.97						2.56	0.99	1.76	0.63						2.99	1.13	1.35	1.37
	1.22	1.34	1.67	2.05						1.44	1.22	2.2	0.93						1.45	1.77	1.4	0.37						2.1	1.81	1.76	0.6						1.37	0.59	2.03	1.15						1.81	0.35	1.49	2.02
	1.92	0.74	1.71	1.22						1.51	1.03	0.84	2.33						2.33	1.26	1.58	1.51						2.3	0.85	1.72	1.09						1.4	0.29	2.12	1.3						1.84	1.36	2.75	0.71
	1.43	0.45	1.27	0.86						1.51	1.59	1.62	0.93						1.41	1.04	1.06	0.72						2.55	1.21	1.89	0.67						2.06	1.47	2.49	0.94						2.56	0.4	2.93	1.05
	1.29	1.16	1.78	1.32						1.3	1.01	2.17	1.2						1.3	1.27	2.19	0.5						1.3	1.69	1.97	0.63						1.77	1.64	1.31	0.89						1.62	0.51	2.26	0.9
	1.97	0.44	1.36	1.08						1.78	0.29	1.25	0.07						1.86	0.85	2.09	0.8						1.93	1.56	1.45	1.24						1.3	0.07	2.9	0.75						1.55	0.75	1.99	0.99
	1.26	1.05	2.01	1						1.59	1.63	2.43	0.89						1.76	0.27	1.61	1.14						1.52	0.33	1.99	1.16						1.89	1.43	3.08	1.38						1.63	0.77	1.89	1.24
	2.31	0.33	1.48	0.83						0.93	0.87	1.24	0.89						1.66	0.33	1.26	1.23						1.35	1.11	2.19	0.64						2.12	1.11	1.37	0.87						3	0.87	1.57	1.39
	1.73	1.06	1.7	1.34						1.33	1.23	1.69	0.98						1.72	0.95	0.99	1.11						2.32	1.77	1.81	1.49						1.4	0.14	2.78	0.94						2.33	1.54	2.29	0.84
	1.53	1.58	1.89	1.13						1.48	0.46	6.1	1.45						1.11	0.73	1.59	0.97						1.7	1.97	2.74	1.13						2.32	0.22	2.44	1.39						1.5	1.36	1.77	0.62
	1.19	1.35	2.24	0.99						1.5	0.64	1.56	1.04						1.73	0.51	1.55	0.99						1.61	0.19	1.09	0.87						1.58	1.27	1.48	1.81						2.25	0.75	2.05	0.62
	2.03	0.34	3.29	1.03						1.16	0.53	1.02	0.82						1.31	1	1.49	1.47						2.81	0.45	2.08	0.66						2.31	0.79	1.67	0.85						2.14	0.95	1.6	1.04
	2.12	0.46	2.04	1						1.03	1.14	1.84	0.96						2.55	1.46	2.18	1.36						1.64	0.85	1.58	1.69						1.77	1.15	2.61	1.18						1.72	0.22	2.56	1.13
	2.3	0.47	1.19	1.75						1.14	1.31	1.97	0.69						1.45	0.33	3.92	0.86						2.48	0.21	1.41	1.28						1.63	1.11	2.57	1.07						3.02	1.1	1.84	0.49
	0.98	0.3	2.08	0.53						1.37	1.42	1.38	1.3						2.1	1.38	1.6	0.94						1.44	0.5	2.27	0.87						2.32	1.51	2.6	1.3						1.6	0.37	2.04	1.34
	1.34	0.93	2.06	1.02						2.88	1.2	1.28	1.32						1.83	1	1.5	0.94						2.27	0.99	1.83	1.08						2.42	1.53	1.51	0.31						2.46	1.77	2.66	0.7
	1.29	1.03	1.21	0.99						1.77	0.58	1.9	1.15						1.68	0.37	1.87	1.42						2.3	1.51	1.43	0.53						1.31	0.79	2.28	1.07						2.48	1.11	2.17	0.77
	1.54	0.99	1.53	1.15						1.83	0.39	1.6	1.18						1.6	0.24	1.34	0.97						1.74	0.9	2.07	1.36						2.13	1.32	1.85	0.79						1.9	0.93	1.77	1.1
	1.76	1.04	1.64	0.86						1.28	0.5	1.56	1.09						1.41	0.28	1.92	0.75						2.23	1.28	1.48	1.04						1.62	1.9	1.44	1.18						2.1	1.59	2.38	1.19
	1.6	0.53	1.36	1.03						1.01	0.32	1.98	0.76						2.28	1.11	2.03	0.61						1.94	0.93	1.47	0.56						2.16	0.91	1.78	0.8						2.62	0.43	2.26	0.78
	1.32	1.51	2.36	0.96						1.5	1.12	1.92	0.97						1.66	0.72	2.36	0.95						1.2	0.78	1.62	1.26						1.97	1.45	2.2	0.98						2.65	0.64	1.74	0.8
	1.14	0.96	1.42	0.85						1.35	1.09	1.46	1.06						1.48	0.1	3.47	1.24						1.71	1.8	1.63	0.9						1.06	0.18	1.54	1.02						1.63	0.18	2.9	0.98
	1.84	0.36	2.72	0.96						1.72	1.43	1.46	0.76						2.28	1.16	2.1	0.93						2.64	1.05	1.76	1.14						2.26	0.86	1.9	1.02						1.56	0.2	2.23	0.87
	2.25	1.35	1.41	0.71						2.01	0.25	2.13	0.89						2.21	1.44	2.17	0.8						1.61	0.42	1.68	1.67						1.62	0.75	1.41	0.54						2.3	0.43	2.24	1.34
	1.12	1.14	1.06	0.34						1.44	0.07	1.82	0.69						3.81	1.15	1.8	0.57						1.3	1.03	1.58	1.33						2.25	0.93	2.12	0.78						1.77	1.24	2.07	1.06
	1.18	1.14	1.28	0.67						2.49	1.27	1.68	1.07						2.44	1.75	2.6	0.6						1.93	1.27	2.2	0.71						2.25	0.53	1.77	1.22						1.54	0.39	1.51	0.93
	1.9	0.44	1.46	1.87						1.93	1.05	1.37	0.92						1.25	0.63	2.37	0.73						1.17	1.01	1.51	0.53						1.84	1.07	1.55	1.39						2.2	1.46	2.36	0.57
	1.08	0.31	1.3	0.63						1.86	0.26	1.11	1.35						1.41	1.11	2.54	1.6						1.94	1.43	2.5	1.17						1.84	1.65	1.66	1.62						2.23	0.8	2.14	0.74
	1.69	1.31	1.79	0.65						1.49	0.76	1.3	1.55						1.96	0.27	2.27	1.35						1.55	0.91	2.07	0.63						1.91	1.77	2.78	1.15						2.01	1.43	1.68	1.2
	2.33	1.44	2.22	1.31						1.8	0.34	1.2	1.32						1.96	0.88	1.77	1.34						1.46	0.42	1.73	1.14						2.75	1.04	2.08	1.11						1.48	0.04	2.44	0.66
	1.68	1.18	1.97	0.7						2.46	0.65	1.4	1.28						1.39	0.64	1.48	1.05						1.76	0.78	1.76	0.65						1.47	0.23	1.85	1.09						2.11	1.67	1.55	0.45
	1.89	1.08	2.26	0.95						1.53	0.94	1.47	0.91						1.23	0.81	2.12	1.09						1.96	1.18	1.67	1.41						1.92	1.44	1.89	0.91						1.62	0.28	2.05	0.61
	1.76	0.74	2.69	0.91						2.04	0.35	1.51	1.31						1.22	0.61	1.26	0.5						1.23	0.67	1.75	1.42						1.13	1.32	1.44	1.02						1.32	0.49	1.74	0.76
	1.02	1.46	1.99	1.54						1.88	0.97	2.23	1.37						1.56	1.28	2.31	1.07						1.24	1.38	1.42	0.65						2.43	1.02	2.07	1.05						1.92	1.14	2.79	0.94
	1.46	1.16	1.66	0.81						1.51	2.03	1.37	1.26						1	1.07	2.14	1.17						1.53	0.79	2.73	1.05						2.15	1.79	1.59	0.94						1.28	0.91	2.24	0.78
	1.87	0.93	1.52	1.25						1.73	0.21	1.33	1.49						1.52	1.49	1.56	1.03						1.73	0.75	1.26	0.62						1.69	1.71	1.44	1.04						1.42	0.47	2.65	0.51
	1.63	0.85	1.05	1.42						2.06	1.01	1.93	1.2						1.82	0.88	1.37	1.01						2.06	1.14	1.55	0.93						1.29	0.75	2.62	1.14						1.66	0.48	2.48	0.63
	1.23	1.53	1.59	0.7						1.03	2.17	2.39	1.09						1.23	1.05	1.66	1.08						1.29	0.82	2.11	0.59						2.21	1.24	1.77	0.94						2.94	0.36	2.11	1.34
	2.15	0.34	1.45	0.77						1.96	1.05	1.15	1.13						1.88	1.37	1.64	1.02						1.6	0.3	1.57	0.77						2.03	1.59	2.52	1.21						1.39	0.3	2.05	0.65
	1.11	0.51	1.93	1.2						1.65	0.42	1.63	1.22						2.14	0.42	2.63	0.79						2.62	0.66	1.91	0.76						2.21	1.24	1.47	1.54						1.96	0.36	2.01	0.96
	1.5	1.1	1.78	1.09						2.07	0.43	1.5	0.64						1.94	1.65	2.59	0.79						1.23	0.93	1.34	1.54						2.45	0.88	1.71	0.75						1.9	0.31	2.56	0.79
	1.83	0.24	1.64	0.79						1.89	1.54	1.93	0.83						1.94	1.36	1.64	0.64						1.73	1.59	2.06	0.62						2.43	0.97	2.01	1.24						2.59	0.71	2.64	0.68
	1.08	0.34	1.73	1.26						2.89	0.77	1.23	1.12						1.2	1.15	1.27	1.05						2.36	0.95	1.82	0.9						1.93	2.3	2.12	1.64						2.21	1.31	2.21	1.07
	2.26	0.61	2.13	0.78						1.1	1.26	1.41	1.76						1.6	1.12	2.1	1.08						1.69	0.99	1.91	1.11						2.76	0.36	2.69	0.77						2.13	0.46	2.35	1.09
	1.75	1.08	1.76	1.19						1.38	1.56	1.29	1.03						1.62	0.45	1.76	0.9						1.54	0.45	2.66	0.83						1.91	1.77	1.41	0.99						2.14	1.13	2.02	0.72
	1.46	1.24	1.44	0.86						1.22	1.28	1.67	0.68						1.9	1.03	1.25	1.06						1.01	1.48	2.3	1.15						1.53	0.84	2.21	1.17						3.35	0.34	1.92	1.15
	1.49	0.55	1.01	1.75						1.03	1.76	1.53	0.88						1.63	0.46	1.91	1.26						1.78	1.67	1.56	1.56						1.29	0.47	2.27	1.17						2.15	1.31	2.74	0.84
	1.82	1.09	2.2	0.68						0.84	1.07	1.18	1.27						1.46	0.84	1.26	0.84						1.62	0.94	2.19	0.99						2.2	1.27	2.57	0.87						1.75	1.24	2.67	0.56
	1.64	0.6	1.59	1.01						1.68	0.26	1.35	0.71						1.39	0.64	1.15	0.95						1.39	0.67	1.65	0.86						1.86	1.1	2.16	0.93						2.58	0.69	2.45	1.09
	1.79	1.22	1.87	0.75						1.56	1.09	1.15	0.96						1.89	1.3	1.37	1.31						1.31	0.31	1.23	0.81						1.7	0.3	2.72	1.65						2.13	1.72	2.64	0.5
	1.14	0.55	2.02	1.26						1.18	1.41	1.45	0.41						1.64	1.59	1.28	0.45						1.89	1.65	1.65	0.48						1.84	1.17	1.83	0.93						2.09	1.29	2.58	1.17
	2.03	1.03	1.56	1.44						1.32	0.8	1.45	0.79						1.75	0.35	1.99	0.71						1.66	0.59	2.37	1.35						1.38	0.27	2.76	0.78						1.31	0.47	1.68	1.37
	1.68	1.09	1.92	0.81						1.93	0.97	5.33	1.9						2.5	1.41	1.41	1.3						1.03	0.46	2.17	0.82						1.9	1.22	2.18	1.46						2.04	0.2	1.4	1.02
	1.89	1.61	1.76	1.23						1.93	1.34	1.86	1.4						1.88	0.42	1.74	0.51						1.57	0.4	1.48	1.02						1.53	1	1.24	1.1						2.14	0.8	1.3	0.59
	1.86	1.6	1.57	0.81						1.16	1.63	1.41	0.79						0.95	0.74	1.51	0.98						2.05	0.26	1.59	1.02						1.45	0.18	1.36	1.15						1.66	0.72	2.25	0.53
	2.23	0.86	1.83	0.73						1.32	0.59	1.9	0.83						1.24	1.31	1.71	0.99						1.74	1.61	1	1.18						2.05	1.02	2.16	0.94						1.5	1.37	1.68	0.64
	1.22	1.32	1.71	1.24						1.34	1.11	1.81	0.43						1.54	0.6	1.15	1.1						1.65	1.17	1.65	0.49						2.6	0.65	1.61	1.08						1.67	0.28	1.66	0.47
	1.73	1.12	2.27	0.49						1.74	0.26	1.34	1.18						1.24	1.2	2.42	1.14						1.3	0.73	1.47	0.51						1.99	1.55	1.43	1.89						2.77	0.69	1.82	0.68
	2.78	0.08	1.87	0.58						1.16	0.81	1.61	1.09						2.78	0.93	1.59	0.42						2.33	0.97	1.55	0.78						1.9	1.78	2.26	1.2						1.98	0.86	1.58	0.69
	1.59	0.49	2.28	1.64						1.9	0.24	1.28	0.88						1.31	0.54	1.85	0.82						1.39	1.56	1.49	0.64						1.33	1.2	1.29	1.32						2.08	1.13	1.92	1.01
	2	1.02	1.61	0.9						1.45	0.4	1.1	1.43						1.42	0.99	1.47	1.11						1.55	0.88	1.5	1.04						2.52	0.59	1.54	0.91						1.61	0.44	1.59	0.75
	1.74	1.07	2.04	0.65						1.46	1.67	1.46	1.16						1.18	1.11	1.54	0.7						2.24	1.15	1.51	0.63						1.79	1.08	2.34	0.91						1.26	0.41	2.01	0.93
	1.33	1	1.94	1.42						1.74	0.39	1.19	0.68						1.69	0.23	1.76	0.81						1.22	1.5	2.02	1.34						2.34	0.79	1.75	1.64						1.2	0.95	2.82	0.79
	1.56	0.86	2.32	0.94						2.02	1.47	2.33	1.15						1.63	0.17	0.87	0.36						1.5	0.48	2.6	1.55						1.82	0.95	1.85	0.6						3.01	1.02	3	1.11
	2.2	0.95	1.66	1						1.33	1.18	1.71	1.22						1.9	0.17	2.14	0.79						2.29	1.27	1.83	1.25						2.69	0.83	1.71	1.28						1.87	0.57	2.25	0.89
	1.47	1.34	1.96	0.9						1.16	1.31	1.76	0.73						1.5	0.47	1.57	0.94						2.24	1.11	1.66	1.15						2.5	0.77	1.92	0.91						1.76	0.61	2.08	1.06
	1.27	0.98	1.83	0.55						1.37	0.65	1.57	0.96						2.08	1.02	1.65	1.13						1.13	0.79	1.51	0.87						1.71	0.48	1.41	0.74						2.52	1.54	2.17	0.88
	2.77	0.48	1.72	0.8						1.59	1.03	1.42	0.89						1.76	0.74	1.98	0.9						2.87	1.25	1.91	1.25						2.2	1.62	2.2	0.95						2.29	1.59	3.06	0.79
	1.37	0.86	1.59	0.61						1.11	2.01	1.49	0.71						1.69	0.23	2.62	0.95						1.84	0.23	2.4	0.97						2.21	0.54	1.7	0.76						2.7	0.36	2.84	1.15
	1.8	1.56	2.22	1.15						1.74	1.3	2.03	1.01						1.44	0.75	2.35	0.51						2.03	1.28	1.87	0.69						1.69	1.39	2.18	0.8						2.18	1.1	1.86	1.2
	1.34	1.88	1.55	0.77						1.63	0.74	1.46	0.53						1.03	1.92	3.35	2.52						1.51	0.39	1.44	1.36						1.78	1.18	2.36	1.24						0.92	0.65	1.79	0.8
	1.43	1	2.19	0.86						1.43	1.09	1.47	1						1.77	0.42	2.61	0.94						2.21	1.1	1.58	1.3						1.29	1.2	2.15	1.23						2.62	1.16	1.7	0.86
	1.86	0.82	1.27	0.53						1.55	0.91	1.92	0.7						1.09	0.85	1.49	1.78						1.84	1.26	1.48	1.56						1.43	1.14	2.19	0.64						1.43	0.79	1.86	1.44
	2.26	0.26	1.85	1.33						1.9	1.5	1.31	0.65						1.58	1.81	1.64	1.15						1.71	1.34	2.04	1.28						1.8	1.77	2.4	0.92						1.65	0.67	1.7	1.33
	1.98	0.84	1.49	0.46						1.56	1.46	1.49	1.35						2.05	1.31	2.66	1.03						2.16	1.87	1.91	0.88						2.56	0.88	1.93	0.73						1.87	1.15	2.89	0.95
	1.14	1.8	2.35	0.94						2.46	1.26	1.83	0.88						1.99	1.38	1.84	1.11						1.15	1.59	1.37	1.09						1.97	1.58	3.05	1.22						2.28	0.98	2.3	1.19
	1.24	1.25	2.02	0.83						1.14	1.88	2.22	1.1						1.3	1.55	0.89	1.5						1.72	1.61	1.24	1.03						2.52	0.69	2.11	0.79						1.88	0.71	2.49	0.77
	1.31	1.07	1.68	1.06						2.2	1.28	1.51	1.22						2.4	1.29	1.57	0.76						1.2	1.14	1.06	1.66						1.86	0.17	2.6	1.17						1.97	1.09	2.48	0.85
	2.28	0.6	1.69	1.21						1.35	0.25	1.87	1.29						1.93	0.22	1.36	0.9						1.8	0.16	1.72	1.29						1.84	1.16	3.25	1.02						0.91	0.52	2.09	0.71
	1.93	0.74	2.68	1.03						1.87	0.46	1.67	0.52						1.93	1.68	1.5	1.24						2.3	1.14	1.43	1.35						1.91	1.26	1.21	1.62						2.12	0.75	1.98	1.12
	1.61	0.43	1.42	0.71						1.06	1.09	1.94	1.22						1.16	1.98	1.5	1.46						1.74	0.4	1.49	0.8						1.91	1.62	1.72	0.98						0.84	1.54	2.32	0.79
	2.01	0.57	1.33	0.64						1.87	0.57	1.18	1						1.34	1.4	1.15	0.91						1.54	0.84	1.38	0.73						2.03	1.12	2.56	0.83						3.05	0.57	1.14	1.11
	2.38	1.37	1.11	1.1						1.53	0.7	1.12	1.53						1.59	0.37	1.86	1.39						1.44	0.81	2.05	0.46						2.82	0.62	1.67	1.3						1.84	0.91	2.05	1.36
	1.73	0.65	2.12	1.94						1.88	0.27	1.25	0.39						1.85	0.35	2.16	0.97						1.94	1.62	1.5	1.18						1.62	0.48	1.57	1.23						1.68	0.53	3.28	0.5
	1.75	0.18	1.28	0.4						1.35	1.21	1.97	0.98						2.38	1.68	1.95	1						2.17	0.86	1.45	1.09						1.79	1.1	1.68	1.32						2.22	1.12	1.83	0.85
	1.17	1.32	1.24	0.49						1.64	0.91	1.4	1.27						2	1.4	1.61	0.97						1.08	0.61	1.85	0.65						2.18	1.14	2.07	1.07						2.03	1.49	2.58	1.3
	2.28	1.52	1.82	0.74						1.63	1.32	1.56	1.24						1.53	0.46	2.5	0.8						1.89	1.46	1.48	0.81						1.43	0.68	1.85	0.85						2.37	0.83	1.8	0.58
	1.91	1.08	1.74	1.01						1.42	1.81	1.58	1.48						1.49	1.62	1.24	1.32						2.66	1.48	1.48	2.39						1.19	0.98	2.09	1.29						1.25	0.66	2.17	0.75
	0.97	0.24	2.13	0.94						1.16	0.84	2.02	0.62						2.14	1.15	1.43	1.03						1.58	1.88	1.39	1.19						1.48	0.49	2.33	0.98						1.67	0.78	1.44	2.25
	1.31	0.08	1.96	1.19						1.76	0.21	1.7	1.3						1.96	1	1.83	1.11						2.32	1.05	1.68	1.08						2.37	1.38	2.71	0.96						1.35	1.19	2.5	0.47
	1.52	0.84	1.74	0.92						2.12	16.64	1.99	1.04						1.66	0.42	1.76	1.37						0.89	1.57	2.09	0.49						1.26	1.65	1.48	1.72						2.84	1.62	2.27	1.75
	1.97	1.46	1.45	0.61						1.51	0.28	2.46	0.88						2.23	1.42	1.29	2.11						1.67	1.39	4.74	1.06						3.43	0.21	2.26	1.01						1.49	0.36	2.64	0.92
	2.24	0.3	1.6	1.5						1.22	1.27	1.73	0.81						1.56	0.85	1.19	1.3						2.01	1.69	2.18	1.42						1.47	0.33	2.02	1.66						2.43	1.45	1.99	0.95
	2.3	1.13	1.83	1.06						1.59	2.39	1.87	1.34						1.33	0.85	1.57	0.82						1.28	0.34	1.17	1.6						2.36	0.94	1.35	1.27						1.4	0.91	2.28	0.77
	1.41	0.81	1.82	0.77						1.7	1.17	1.47	0.79						1.61	0.56	2.3	0.9						1.7	0.53	1.58	1.36						1.46	0.45	2.55	0.92						2.78	1.42	3.05	1.57
	1.17	0.62	1.97	0.77						1.76	0.73	1.29	1						1.6	1.13	1.51	1.46						1.65	0.92	1.29	0.51						2.31	0.83	2.27	2.05						2.93	1.26	1.92	0.88
	1.53	0.82	1.89	1.24						1.76	0.26	1.46	0.64						2.4	1.31	2.93	1.74						1.59	1.38	1.57	0.91						1.45	1.64	1.98	1.32						2.59	0.84	2.41	0.77
	1.87	0.56	1.61	0.79						2.06	1.16	1.73	0.94						1.88	1.26	1.94	1.06						1.15	0.81	1.31	0.99						1.89	1.39	1.83	1.39						1.35	0.54	2.93	0.9
	1.63	1.56	1.7	0.51						1.86	2.06	1.28	0.45						1.83	1.84	9.32	1.16						1.45	1.33	1.34	1.43						1.36	0.37	1.65	1.73						2.1	0.94	1.86	1.72
	1.25	1.41	1.3	1.51						1.74	1.5	1.71	0.57						1.27	1.03	5.15	1.42						1.47	0.66	1.45	1.43						1.95	1.32	2.59	1.51						1.88	0.92	1.58	1.78
	2.02	1.15	1.65	0.98						2.08	1.55	1.52	1.25						1.87	1.23	3.73	1.39						2.13	1.22	1.52	0.75						2.2	1.44	0.92	0.63						1.6	0.91	3.01	1.42
	1.78	0.54	1.62	1.33						1.45	1.44	1.18	0.68						2.18	0.8	1.45	1.28						1.36	0.87	1.5	1.35						1.42	1.35	1.09	1.97						1.75	0.59	2.14	0.61
	1.66	1.18	1.89	1.25						1.02	0.12	1.31	0.96						1.39	1.37	1.47	0.98						2	1.55	1.81	0.67						2.21	1.38	1.87	1.09						1.97	0.81	1.59	0.64
	2.13	0.9	1.34	1.16						1.96	0.18	1.13	1.19						1.57	0.3	1.7	1.24						1.42	0.4	1.37	0.92						2.59	0.4	1.87	1.41						1.64	0.14	2.57	0.57
	1.35	2.09	1.46	1.41						1.21	1.73	1.57	1.01						2.22	1.83	1.77	0.75						1.83	1.18	1.69	1.15						1.06	0.65	2.07	1.03						2.77	0.68	1.61	1.91
	1.09	0.74	1.4	0.74						1.46	1.62	1.52	0.85						1.42	0.8	1.3	0.44						2.02	0.85	1.72	1.28						1.45	0.14	1.65	0.56						1.78	1.18	2.77	1.5
	1.62	1.3	1.46	1.25						1.77	0.27	1.97	0.89						2.16	1.38	2.63	1.06						3.49	0.52	1.86	1.16						1.25	0.43	2.16	1.1						2.42	1.4	1.78	1.98
	1.68	0.2	1.44	0.74						1.18	1.9	1.67	0.84						1.21	2.18	1.52	0.55						1.47	0.33	1.03	1						2.58	0.91	2.77	1.71						2.88	0.94	2.76	1.02
	1.93	0.53	2.01	0.58						1.21	0.8	1.94	0.9						1.47	1.45	1.61	1.54						1.21	1.57	1.98	1.17						1.74	0.2	1.17	0.47						2	1.37	2.92	0.91
	1.35	1.01	2.03	1.22						4.53	0.97	1.26	1.05						1.4	1.09	1.69	0.66						2.35	0.93	1.7	0.71						1.78	1.25	3.12	0.92						1.92	1.27	2	0.8
	1.27	1.09	1.37	0.58						2.45	1.1	1.5	1.38						1.3	1.74	1.41	0.25						1.95	1.36	1.48	0.89						1.38	0.51	2.71	0.8						2.61	0.65	1.55	1.99
	1.73	0.77	1.9	1.48						1.48	0.84	1.39	1.41						1.2	1.03	1.49	0.45						1.03	1.84	1.65	0.76						1.59	0.23	2.18	1.01						1.87	0.94	2.61	0.66
	1.56	0.48	1.84	0.85						1.31	1.72	1.24	2.03						1.54	0.37	1.31	0.57						1.57	0.69	1.82	1.22						1.97	1.23	2.55	1.27						1.72	0.63	1.67	1.18
	1.57	1.31	1.45	0.73						1.76	0.11	1.79	0.71						1.07	0.65	1.65	1.16						1.35	0.37	1.74	1.11						1.37	1.13	1.17	0.64						2.66	1.68	1.98	1.43
	1.4	0.72	1.88	1.27						1.58	1.05	1.42	1.17						1.69	0.29	2.28	1.57						1.59	0.3	2.33	1.15						1.8	1.3	1.57	1.07						1.47	0.48	2.74	0.59
	1.88	0.21	1.82	1						3.2	1.42	1.92	1.21						1.14	0.79	1.57	0.71						2.97	0.8	1.37	0.63						1.64	0.48	1.62	0.69						1.87	1.37	1.68	1.77
	1.72	1.18	2.37	1.2						2.43	1.54	1.69	1.47						1.86	0.66	2.05	1.33						1.61	0.19	1.82	1.08						1.36	0.83	2.14	1.03						1.91	1.16	1.99	0.86
	1.4	2.8	1.13	0.7						1.44	0.61	2.11	0.77						2.42	1.12	2.2	1.27						2.73	1.33	2.18	1.39						1.61	0.71	1.15	0.92						1.94	0.53	2.52	1.12
	1.58	0.26	1.57	1.39						1.59	1.08	2.13	1.55						1.99	0.96	1.91	1.52						1.39	0.19	2.23	1.14						1.93	1.28	1.26	0.84						2.37	1.29	3.24	0.66
	1.66	0.4	1.56	1.19						1.5	1.26	2.05	1.42						2.38	1.11	3.93	0.9						1.55	0.77	1.19	0.99						1.86	0.32	2.84	0.83						2.11	0.33	2	1.04
	1.92	1.29	1.97	0.72						1.34	0.82	1.4	1.04						2.16	1.82	1.72	0.86						2.31	1.47	2.79	0.95						2.69	0.88	2.59	1.08						2	1.15	2.82	1.1
	1.26	1.34	1.12	0.73						1.56	0.19	2.22	0.79						1.4	0.93	1.46	1.04						1.74	0.28	2.01	1.15						1.97	0.84	2.19	1.17						1.32	0.88	2.24	0.94
	1.84	1.56	1.74	1.31						1.8	0.81	3.16	1.15						1.71	0.83	1.34	0.48						2.1	1.32	1.87	1.06						2.56	1.5	1.9	1.62						2.07	0.74	1.79	1.52
	1.77	0.21	1.81	1.4						1.47	0.29	1.75	0.74						2.18	0.77	1.68	0.61						1.24	0.63	1.8	1.08						2.13	1.96	1.39	0.79						1.79	0.61	1.77	0.51
	1.12	1.52	1.62	1.02						1.44	0.35	1.26	0.88						1.36	1.72	1.31	1.06						1.5	0.25	2.08	0.88						2.76	0.91	2.51	1.07						2.29	0.8	2	0.85
	1.64	0.8	2.01	0.6						1.44	0.88	1.94	0.34						1.27	1.04	1.38	0.83						2.58	1.17	1.58	0.9						2.17	0.77	2.22	0.84						1.95	1.04	2.39	0.99
	1.42	0.68	1.6	1.18						1.76	1.54	1.73	0.66						2.04	1.33	1.28	0.84						2.08	1.23	1.62	1.76						1.7	0.8	2	0.64						1.81	0.48	1.82	0.65
	1.47	0.82	1.8	1.02						1.42	1.24	1.44	1.09						1.07	1.35	1.74	0.85						1.77	0.46	2.04	0.59						2.59	1.5	1.66	1.6						1.81	1.17	2.54	1.33
	1.14	1.5	3.99	0.63						1.45	0.28	1.82	1.39						1.14	1.57	4.99	0.78						1.45	2.06	1.65	1.27						1.55	1.19	1.93	1.28						1.25	1.58	2.14	1.08
	1.47	1	1.79	0.97						1.64	1.12	1.55	1.89						1.83	1.19	1.48	1.02						1.81	1.87	1.3	0.89						2.46	1.23	2.65	0.72						3.73	1.58	1.66	1.69
	1.75	1.34	2.13	1.08						2.25	0.39	1.29	0.84						1.38	1.34	1.96	0.98						1.96	1.19	1.63	0.72						1.38	0.37	2.27	0.76						2.12	1	1.81	0.71
	2.14	0.95	1.95	0.59						2.6	0.31	1.18	0.61						1.59	0.93	2.26	0.82						1.96	1.02	2.17	1.36						2.26	1.6	1.61	1.17						1.7	0.27	2.01	1.74
	1.09	1.5	1.88	1.1						1.23	0.45	1.9	0.94						2.13	0.74	1.2	0.62						1.88	1.03	2.36	1.43						1.83	1.39	1.43	1.05						2.06	1.32	2.58	0.91
	2.19	0.45	1.31	0.92						1.83	0.99	2.92	0.75						1.25	1.88	1.59	0.65						1.16	1.23	1.41	0.85						2.14	1.26	1.37	0.91						1.81	1.31	1.67	0.78
	1.28	1.91	1.55	0.55						1.61	0.32	2.08	1.03						1.45	1.25	2.06	0.89						1.95	1.47	1.49	1.57						1.54	0.45	1.63	0.54						2.2	0.81	1.87	0.79
	1.86	1.3	1.38	1.47						1.36	0.91	1.3	1.19						1.27	1.09	1.35	1.01						1.19	1.31	1.44	1						2.65	1.04	2.3	1.28						2.35	0.77	2.12	1.17
	2.04	0.44	2.09	0.6						1.78	0.63	1.59	1.71						1.5	0.85	2.29	0.75						1.96	0.76	2.72	1.89						1.51	0.46	1.22	0.8						2.01	1.51	2.21	1.28
	1.8	1	1.3	0.59						2.27	1.05	1.59	0.52						1.6	0.5	1.79	1.04						1.78	0.63	1.77	0.92						1.87	1.36	2.13	1.55						2.43	1.13	3.19	1.31
	1.04	1.42	1.89	0.92						1.62	0.42	1.64	1.21						1.83	0.77	1.17	0.88						1.59	0.43	2.67	1.08						1.95	0.5	2.11	1.23						1.85	0.34	2.61	1.54
	2.79	1.22	1.78	0.8						1.9	0.54	1.89	1.36						1.39	1.22	1.26	0.33						1.15	0.82	1.53	1.06						1.7	2.37	2.61	1						2.43	0.73	1.92	1.34
	1.91	0.39	1.68	0.69						1.86	0.42	0.89	0.97						2.1	1.91	2.31	0.72						2.31	1.06	1.68	1.12						2.03	1.95	1.6	1.11						1.44	1.73	2.55	1.05
	1.72	0.78	1.92	0.83						1.09	1.67	1.57	1.46						2.12	0.41	1.6	1.08						1.76	1.83	1.16	0.8						2.26	1.36	1.65	1.18						1.72	0.27	3.17	0.92
	1.4	0.98	1.79	1.82						0.83	1.55	2.48	1.25						1.26	1.15	1.5	1.23						1.72	0.15	1.44	2.09						2.07	1.19	2.37	0.78						2.75	0.72	2.11	1.07
	1.7	0.92	1.21	0.9						1.53	1.35	1.46	1.2						1.62	0.3	1.53	0.85						2.53	1.2	1.83	0.86						2.39	1.37	1.99	1.1						2.34	0.74	2.69	1.03
	1.59	1.23	1.66	1.04						2.14	0.56	1.27	1						2.29	1.32	2.25	0.97						1.26	1.58	1.85	0.6						1.72	1.13	2.48	0.93						2.72	1.89	1.76	1.33
	2.15	1.17	1.1	0.77						1.41	1.43	1.27	0.69						2.02	0.81	2.01	1.06						2.63	1.72	2.84	1.43						1.7	0.94	1.31	1.38						1.67	0.96	1.88	0.94
	1.07	0.68	1.7	0.88						1.2	0.67	2.19	0.98						2.18	0.19	1.36	0.86						2.39	1.39	2.62	1.16						1.32	0.13	2.35	0.83						1.76	1.46	1.48	1.93
	0.97	1.5	1.9	0.81						1.5	1.75	1.79	1						1.61	0.54	2.51	0.7						2.06	3	1.3	0.85						1.54	1.5	2.25	0.81						2.05	0.82	1.93	0.5
	3.37	0.21	2.4	0.69						1.49	1.16	1.06	1.31						2.67	0.34	1.98	0.55						1.51	0.79	1.89	0.74						2.11	1.28	1.58	1.35						2.64	0.45	1.49	1.83
	1.81	0.88	1.1	1.07						1.64	1.2	1.6	0.84						2.3	1.29	1.53	1.18						2.59	1.3	1.59	0.82						1.61	0.27	1.19	1.17						1.4	1.56	1.86	1.04
	2.34	0.99	1.77	1.04						2.46	1.82	1.64	0.6						1.54	0.33	2.14	0.63						2.03	1.68	2.27	0.8						2.34	0.8	1.79	1.4						2.28	1.4	2.8	1.98
	1.61	1.53	1.26	1.39						2.6	0.9	1.72	1.1						1.65	0.22	1.44	1.21						1.55	0.44	2.5	2						2.65	0.48	2.66	1.04						1.87	2.2	2.43	0.88
	1.47	0.79	1.87	0.48						2.76	1.12	2.15	1.05						1.75	1.45	1.37	0.95						1.38	1.21	1.67	1.1						1.26	0.53	1.42	1.09						2.94	1.62	2.33	0.77
	2.11	0.76	1.7	1.38						1.57	1	1.72	1.43						1.21	0.97	2.91	1.37						2.64	1.24	1.49	0.89						1.73	1.66	2.13	0.95						1.32	0.25	1.93	1.05
	1.49	1.78	1.28	0.88						1.76	0.41	1.79	0.83						2.02	2.3	1.29	0.77						2.78	1.96	2.49	1.08						1.91	1.23	2.71	0.63						2.21	2.02	1.94	0.62
	0.92	0.26	1.94	1.09						1.6	0.26	2.55	0.62						1.08	0.94	1.44	0.96						2.38	1.73	1.85	0.79						2.22	1.56	1.54	1.03						3.11	0.78	2.3	1.28
	1.51	1.59	1.27	0.93						1.49	1	1.67	1.06						1.5	0.74	1.48	1.27						2.75	1.45	1.46	0.9						2	1.25	1.78	1.37						2.57	1.6	1.22	1.93
	1.31	1.35	2.24	1.21						1.78	0.25	1.5	1.21						1.94	0.27	1.72	2.13						1.65	0.4	1.54	1.22						1.45	0.7	1.27	0.8						2.91	0.16	1.64	0.98
	1.39	0.75	1.27	0.95						1.27	1.28	1.96	1.21						1.97	0.62	1.54	0.88						2.15	1.23	1.62	1.25						3.24	1.16	2.81	0.86						1.75	0.7	2.02	1.34
	1.14	1.71	1.16	1.67						2.42	0.53	3.57	0.91						2.64	1.4	2.68	0.88						2.21	1.2	1.73	0.94						2.7	0.59	1.94	0.91						2.15	0.45	1.32	1.87
	1	0.66	1.66	0.98						1.96	0.82	1.65	0.89						5.87	1.31	1.34	1						1.19	2.13	2.48	0.77						2.53	0.77	2.37	1.21						1.62	2.26	2.06	0.85
	1.67	0.34	2.53	0.91						2.17	1.16	1.74	0.97						1.18	1.6	2.86	0.91						1.3	1.48	1.41	1.33						2.02	0.84	1.93	0.76						1.37	0.36	1.28	2.06
	1.2	0.77	1.87	0.8						1.86	0.48	2.05	0.8						1.57	1.17	1.56	0.64						1.22	1.13	1.68	1.15						0.99	0.54	1.83	1.3						2.71	1.11	2.77	0.83
	1.27	1.06	1.83	0.58						2.07	0.73	1.55	1						1.58	0.31	1.5	1.04						0.89	2.08	1.33	1.14						2.13	1.26	2.28	1.36						1.78	0.43	2.81	1.11
	1.34	1.65	1.45	0.73						2.94	1.37	2.03	0.88						1.55	0.81	2.62	0.78						2.98	0.25	1.23	1.02						1.04	1.91	1.71	0.87						1.63	0.06	1.74	0.78
	1.81	0.24	1.35	1.24						2.04	0.23	1.26	0.28						2.24	1.43	1.87	0.6						2.5	1.69	2.54	1						2.28	1.83	1.87	0.72						1.88	1	1.88	1.19
	1.39	1.38	1.69	1.21						1.46	1.49	1.66	1.1						1.86	1.18	1.77	0.67						1.87	0.69	1.92	1.04						1.52	0.21	2.17	0.98						1.57	0.45	1.7	0.49
	2.09	0.41	1.47	1.37						1.57	1.25	1.59	0.76						1.29	0.76	1.78	1.27						1.53	1.97	1.33	1.18						0.99	1.32	1.72	0.67						1.75	1.33	2.06	0.56
	1.83	0.58	1.31	0.55						2.53	1.53	1.69	1.13						1.16	0.9	1.59	1.1						1.81	1.03	0.95	0.6						2.27	0.73	1.71	1.26						1.44	0.36	1.8	1.33
	2.02	0.57	2	1.18						1.77	0.45	1.15	1.06						1.84	0.17	2.05	0.88						2.41	1.7	2.3	0.77						1.69	0.31	2.71	0.95						1.59	0.95	1.91	1.36
	1.54	0.96	1.36	0.81						2.42	0.97	1.7	1.4						1.71	0.93	1.29	0.48						1.69	0.21	1.52	0.92						2.3	1.03	2.28	1.58						2.72	1.24	2.31	1.28
	1.22	1.24	1.77	0.62						1.37	1.23	1.39	1.1						1.23	0.31	2.56	1.28						2.06	1.24	1.94	0.56						1.58	1.12	1.54	1.19						1.56	0.6	2.08	0.98
	1.44	1.72	1.64	0.9						2.14	0.65	1.33	0.91						1.3	0.75	1.08	0.56						1.19	1.41	2.62	0.94						2.36	1.16	1.61	1.19						2.23	1.17	1.66	1.59
	1.85	0.37	1.42	1.27						1.99	0.57	1.52	0.83						1.78	0.34	2.05	0.71						2.31	1.09	1.6	0.95						2.16	0.76	1.94	0.65						2.18	1.38	1.81	1.58
	1.91	0.47	2.17	1.1						1.59	1.12	1.51	1.01						2.2	1.09	2.55	0.4						1.64	0.77	1.57	0.71						1.44	1	2.08	1.1						1.87	0.61	1.45	1.08
	1.32	1.13	4.33	0.79						3.21	1.98	1.44	0.76						1.25	1.53	1.42	1						2.32	0.87	1.53	0.73						2.71	0.67	1.63	1.05						2.24	1.58	2.62	0.81
	1.51	1.15	1.36	1.12						1.54	0.89	1.28	0.87						1.25	2.5	2.08	0.8						1.2	1.19	1.66	1.12						1.21	1.12	6.54	0.87						1.95	1.95	2.96	1.62
	1.54	0.44	1.38	0.78						1.94	1.28	1.51	1.11						1.53	0.74	1.74	1.14						2.03	1.03	2.09	1.03						5.66	0.98	2.14	0.83						2.28	0.74	1.9	1.07
	1.17	1.27	1.84	0.93						2.14	0.19	1.12	0.48						1.6	0.77	3.12	1.23						1	2.08	2.12	1.52						3.76	0.38	2.22	1.29						2.27	0.71	2.31	1.71
	1.1	1.94	1.48	0.78						1.08	1.63	1.77	1.12						1.37	1.32	1.67	0.83						1.83	1.76	1.38	0.59						1.62	1.76	2.04	0.88						2.15	0.17	1.89	1.07
	1.82	0.47	1.97	0.49						1.76	0.61	2.18	0.92						1.56	0.31	1.16	0.49						1.9	1.23	1.2	1.69						1.26	0.8	1.73	1.66						2.16	2.36	2.02	1.48
	1.67	1.65	1.8	0.72						2.17	1.29	1.52	0.62						1.12	1.07	2.09	1.08						2.24	1.35	1.63	1.04						1.39	0.22	2.07	0.81						2.8	1.84	2.11	0.87
	2.24	0.34	2.08	1.02						1.09	1.28	2.05	1.28						1.02	0.91	1.18	0.61						1.96	1.84	1.67	1						1.63	0.91	1.71	0.39						1.99	1.3	1.45	0.75
	1.18	1.44	1.6	0.96						1.35	1.61	1.38	0.93						1.72	1.23	1.78	0.63						1.41	1.16	2.38	0.81						1.49	0.16	1.56	0.62						1.9	0.43	1.95	0.81
	1.61	1.04	2.66	0.92						0.98	0.82	1.74	0.89						1.98	0.3	1.06	0.44						1.35	1.35	2.3	1.33						1.6	1.25	1.43	0.68						2.65	1.79	1.08	0.83
	1.43	0.3	1.75	1.47						1.35	0.91	1.73	0.97						2.13	0.81	1.06	0.8						1.47	0.89	1.79	1.43						1.4	1.24	2.14	1.16						1.42	1.3	2.29	0.87
	1.67	0.3	1.74	0.63						1.65	1.32	1.32	1.04						1.45	1.26	2.48	1.4						1.47	1.17	1.74	0.72						1.73	0.91	1.72	0.84						2.82	1.41	2.7	0.93
	1.56	0.27	1.33	1.15						1.46	0.34	1.62	0.98						2.42	0.68	1.79	1.34						1.85	1.22	1.62	1.61						2.62	0.76	1.32	1.12						2.86	0.84	2.53	0.63
	1.85	0.16	1.74	1.18						1.5	0.23	1.43	1.09						1.51	0.73	1.64	1						2.26	1.03	1.41	0.73						1.64	0.59	1.27	0.8						1.49	2.37	2.94	0.59
	1.99	0.34	2.21	0.76						1.36	1.42	1.95	1						1.64	0.62	1.65	1.16						1.33	0.6	0.89	1.03						1.16	1.47	3.96	0.98						1.77	0.76	1.66	0.62
	1.75	1.06	1.44	1.1						1.21	1.3	2.7	0.92						1.13	1.55	2.48	0.8						2.77	1.63	1.71	0.53						2.68	0.13	1.79	0.74						1.35	0.53	2.58	0.92
	1.8	1.21	2.6	0.71						1.91	0.71	2	0.72						1.68	0.43	1.06	1.01						2.07	0.71	1.76	0.92						1.7	0.8	1.47	0.61						1.12	0.44	1.81	1.51
	1.53	1.99	1.67	0.83						2.01	0.48	1.63	1.23						1.34	0.79	1.86	1.2						1.16	1.36	1.46	1.43						1.99	0.81	1.2	0.77						2.29	0.88	2.49	0.94
	1.61	1.66	1.62	1.08						1.88	0.99	1.29	1.18						2.41	0.85	1.44	0.82						1.67	0.4	1.35	1.19						3.13	1.29	1.7	0.84						1.35	1.19	1.83	0.72
	1.61	1.22	2.02	1.04						1.2	1.26	1.79	1.3						2.24	1.29	1.88	0.76						2.11	0.75	2.65	0.91						2.02	0.99	1.31	0.92						2.19	1.13	2.27	0.64
	1.4	1.14	1.65	0.75						1.37	1.04	2.22	0.8						2.34	1	1.7	1.53						2.04	1.66	2.06	1.21						2.14	1.33	2.35	0.97						2.94	0.44	1.41	0.79
	1.76	0.91	2.15	1.06						1.48	0.81	2.25	1.15						1.33	1.77	2.48	0.93						2.07	1.16	1.74	0.77						2.32	1.85	2.69	1.33						2.65	1.19	1.52	1.32
	2.02	0.4	3.66	1.37						1.5	0.64	1.96	0.58						1.55	1.29	1.05	0.36						1.25	0.94	1.28	1.06						2.29	0.96	1.81	0.82						1.66	0.66	2.94	0.51
	2.78	0.68	5.07	0.92						1.4	0.74	1.53	1.05						1.47	1.24	1.62	1.07						1.49	0.69	1.26	0.94						1.93	1.2	1.31	1.52						2.22	1.66	2.72	1.07
	1.17	0.69	3.03	1.41						1.56	0.2	1.6	0.89						2.41	0.79	2.38	0.89						1.36	1.49	1.75	0.9						1.11	0.96	3.2	1.52						2.54	0.48	1.62	0.59
	2.89	1.3	1.89	0.73						1.22	0.6	1.65	0.91						1.71	1.56	1.69	1.22						1.32	1.06	1.63	1.18						1.45	0.57	1.31	1.12						2.36	0.45	1.6	1.11
	2.37	1.37	2.5	1.25						1.53	0.95	1.91	1.09						1.93	0.35	1.35	1.05						1.81	0.46	1.19	1.14						1.73	1.4	2.11	1.23						2.72	1.3	2.18	0.73
	1.39	1.74	1.59	0.91						1.24	0.49	0.93	0.77						2.62	0.97	1.97	0.56						1.79	0.41	1.84	1.05						1.81	1.04	1.5	1.47						1.64	0.2	2.07	1.05
	1.22	1.72	2.57	0.78						1.1	1.07	1.49	0.89						1.2	0.96	1.5	0.25						1.3	1.39	1.52	0.9						1.63	1.3	2.47	1.11						2.33	1.63	2.03	2.6
	1.6	0.29	1.92	1.29						1.08	1.26	3.08	1.03						1.99	0.63	2.13	1.01						1.54	0.24	1.74	1.29						1.82	1.51	1.83	0.83						2.58	0.85	1.67	0.86
	1.54	0.85	2	0.89						1.63	0.9	2.14	0.87						1.29	0.93	2.83	0.64						1.38	0.27	1.4	1.34						1.4	0.39	1.79	0.92						2.74	0.93	2.07	0.7
	3.37	1.02	1.25	0.72						2.04	0.24	1.56	1						2	0.61	2.4	1.31						1.17	0.73	1.78	0.83						2.25	1.46	2.09	1.06						1.79	0.23	2	1.02
	1.75	0.23	1.94	0.89						3.53	0.71	1.83	0.83						2.29	0.63	1.36	1.41						1.23	0.38	1.37	0.55						1.92	1.52	2.03	0.82						2.28	1.1	2.69	1.06
	1.89	1.14	2.03	0.91						1.63	0.33	4.07	0.74						1.35	0.78	1.76	1.1						2.04	1.6	1.47	0.8						2.52	0.33	1.93	0.79						1.6	0.32	2.08	0.81
	1.43	0.99	1.24	0.67						1.8	0.68	1.1	1.58						1.83	0.66	1.41	1.71						1.7	0.32	1.77	0.76						1.37	0.67	1.81	0.71						2.05	1.24	1.79	0.82
	1.25	1.42	2.08	0.95						2	1.06	1.84	0.79						1.42	1.06	1.72	1.06						1.61	1.07	1.29	1.07						1.38	0.22	2.26	0.97						3.04	0.55	1.59	1.22
	1.75	0.63	1.75	0.94						1.5	0.98	1.34	1.29						2.03	1.45	3.44	0.53						1.31	0.56	1.41	0.73						2.14	1	2.24	0.81						1.79	0.95	1.66	1.23
	1.67	1.76	1.9	1.31						1.56	2.18	1.29	1						1.88	1.53	1.42	0.82						1.56	0.74	1.54	1.14						2.19	1.11	1.42	1.25						2.81	1.35	1.63	1.31
	1.74	0.43	1.12	0.76						1.25	1.39	1.93	1.64						1.96	0.94	2.3	1.47						1.33	1.6	1.81	0.68						1.6	1.35	1.99	0.93						1.96	0.73	2.91	1.26
	1.53	1.52	1.64	0.99						4.49	0.89	3.55	0.92						1.97	0.73	1	1.29						1.57	0.23	1.68	1.07						1.96	1.57	2.56	1.51						1.68	1.09	1.55	1.22
	1	0.46	1.94	1.35						1.34	2.01	1.82	1.31						2.49	1.05	2.01	0.91						1.36	1.37	1.52	1.35						1.16	0.75	1.73	0.77						1.95	1.35	1.56	0.62
	1.67	0.93	1.97	0.62						1.14	0.56	2.14	0.97						1.35	1.66	2.16	0.52						1.83	1.27	1.49	1.03						1.79	0.14	2.44	1.78						1.52	0.47	1.72	1.11
	1.23	1.51	2.08	0.88						3.21	1.26	1.31	1.13						1.73	0.74	1.46	1.2						1.8	0.4	1.47	2.05						2.03	1.07	2.27	1.22						2.18	0.83	2.01	1.23
	1.95	0.6	1.48	0.95						1.69	0.75	1.63	0.86						1.81	1.03	2.8	0.61						2.37	1.33	1.76	1.09						1.7	1.21	1.39	1.84						2.1	0.95	2.61	0.92
	2.18	0.64	1.74	0.95						1.98	1.62	1.42	0.91						1.95	0.77	1.45	1.16						1.69	1	1.73	0.86						1.32	1.31	2.76	1.25						2.14	1.04	1.69	1.34
	1.54	0.7	1.54	1.39						3.76	1.51	1.44	0.95						2.16	1	2.2	0.72						1.68	1.53	1.59	1.47						2.63	0.15	1.81	0.6						2.48	1.58	2.48	1.01
	1.45	0.58	1.68	0.91						1.2	2.12	1.22	1.31						1.08	0.81	1.19	0.45						1.37	1.53	1.84	0.82						1.56	0.78	2.51	0.84						1.73	0.86	2.24	0.86
	1.52	0.77	2.28	0.72						1.6	0.37	1.99	0.88						1.03	0.96	1.36	0.85						1.96	0.78	1.48	1.13						1.31	0.91	1.46	1.08						1.64	0.65	2.21	0.78
	1.1	1.43	1.58	0.9						1.88	0.35	1.68	1.27						1.48	1.27	1.68	0.79						1.36	0.26	1.17	1.21						1.81	0.94	2.43	1.07						1.78	1.37	1.37	1.06
	1.38	2.13	1.73	1.05						1.52	0.61	1.7	1.75						1.42	0.2	1.49	0.78						1.92	1.42	1.55	0.96						1.08	1.48	2.34	1.18						2.58	1.57	2.14	0.61
	1.9	1.21	2.04	1.06						1.69	0.23	2.24	1.12						1.47	0.69	1.58	0.84						1.83	1.27	1.84	0.88						1.42	0.7	2.35	0.82						1.32	0.84	2.33	1.51
	1.34	1.28	2.23	0.53						1.59	1.52	2.48	0.51						1.77	0.37	2.11	1.3						2.04	1.94	1.84	1.22						1.82	1.46	1.61	0.72						1.94	0.33	2.47	1
	1.35	1.06	1.9	0.95						1.47	2.3	1.33	0.82						1.47	0.65	1.71	1.13						1.75	0.5	2.16	1.13						1.7	0.28	1.72	0.92						2.27	1.31	2.18	1.17
	1.65	0.54	1.82	1.13						3.74	0.57	1.54	1.13						1.61	0.25	2.73	1.41						1.83	1.11	1.64	1.06						1.66	0.5	1.7	0.62						1.94	1.12	2.67	1
	1.83	0.99	1.51	0.7						3.91	0.67	1.74	0.77						1.8	1.24	1.35	1.35						1.28	0.99	2.07	0.95						2.56	1.08	2.19	0.92						1.4	0.46	2.08	0.75
	1.56	0.34	1.92	1.11						1.5	1.25	1.51	1.38						1.44	0.69	1.78	1.15						1.92	0.82	1.72	1.05						1.3	1.32	1.86	1.11						1.53	0.1	2.74	0.77
	1.34	0.92	2.09	1.09						1	1.03	2.05	0.88						1.63	1.5	3.65	1.29						1.7	1.04	1.8	1.09						1.44	0.24	2.53	1.06						3.81	1.34	4.2	0.83
	1.24	0.96	2.07	1.02						1.9	1.31	1.69	1.21						1.23	1.4	1.18	0.21						1.32	2.24	1.48	1.48						1.51	0.62	2.58	0.98						1.82	1.29	2.95	0.53
	1.64	0.78	1.15	0.69						2.6	1.66	1.33	0.83						1.46	0.18	1.75	1.24						1.69	0.41	2.34	0.93						1.47	0.72	2.78	1.37						2.42	1.05	2.46	0.9
	1.62	1.66	1.82	1.32						1.92	1.09	1.36	0.69						1.76	0.18	1.37	0.99						1.37	0.84	1.45	1.15						2.2	1.13	1.69	0.94						2.2	1.55	2	1.08
	1.61	1.57	1.6	0.75						1.25	0.65	1.68	1.15						1.75	0.7	1.41	0.53						2.01	0.84	1.65	0.77						2.54	1.1	2.03	0.96						3.09	0.44	1.61	1.13
	1.42	0.56	1.73	1.4						2.24	0.16	1.91	1.17						2.02	0.59	1.31	0.93						1.83	0.94	1.72	0.06						1.77	0.17	1.72	0.99						2.44	0.3	2.34	0.5
	1.17	1.38	1.52	1.01						1.48	0.99	1.53	0.93						1.84	0.64	1.71	2.85						1.97	0.81	1.45	1.27						1.78	0.76	2.99	1.2						2.47	1.12	2.57	0.89
	1.72	0.71	1.82	0.91						1.84	0.46	1.4	0.57						1.44	0.54	1.79	1.31						1.52	0.86	1.86	1.02						1.51	0.7	1.97	0.69						2.66	1.53	1.98	0.73
	2.06	0.48	1.53	1.28						1.42	1.14	1.84	1.34						2.28	1.98	1.76	0.83						1.47	0.49	2.28	0.96						2.19	1.05	2.07	0.43						1.4	1.2	1.92	0.41
	2.84	0.99	1.99	0.69						1.47	1.13	2.64	1.14						2.05	1.7	1.35	0.95						1.59	0.99	1.45	1.15						1.98	0.61	2.16	1.07						1.49	1.65	1.88	0.61
	1.84	1.01	1.39	0.82						1.29	0.63	1.14	0.52						2.63	1.05	1.25	0.79						2.62	0.81	1.39	1.97						1.57	1.18	1.47	1.78						1.68	1.47	3.12	1.25
	2.21	0.38	1.79	1.45						1.12	0.83	1.43	0.93						1.72	1.14	1.41	1.54						1.35	1.59	1.54	1.05						2.37	0.95	1.38	1.04						1.75	1.45	2.15	0.9
	1.24	0.91	1.97	1						1.44	1.39	1.27	0.88						1.47	1.76	1.58	0.83						1.72	1.47	1.98	0.95						2.28	1.13	2.46	0.76						2.93	0.81	2.14	0.6
	1.37	0.97	2.21	0.41						1.32	0.76	0.76	1						1.2	0.81	1.89	0.89						1.84	1.4	1.72	1.01						1.81	0.92	2.51	1.21						2.1	1.09	2.25	0.91
	1.94	2.86	1.75	0.9						1.63	0.52	1.99	1.02						1.61	0.61	1.67	2.42						1.48	0.58	2.21	0.75						2.76	0.6	1.43	0.76						1.54	1.45	1.78	0.62
	1.26	1.09	1.83	1.27						2.29	1.45	1.91	0.91						1.99	1.54	1.57	1.11						2.03	0.81	1.89	0.92						1.45	0.49	2.22	0.54						1.41	0.28	5.67	1.1
	1.42	1.58	1.74	0.75						1.13	2.41	1.8	1.02						1.79	0.74	1.9	0.9						2.1	1.35	1.17	1.5						2.02	1.15	1.59	0.82						1.91	1.64	2.21	0.95
	1.58	1.03	2.26	0.83						1.4	0.84	1.46	1.21						2.91	0.95	1.81	0.53						1.81	0.59	1.09	0.79						1.87	0.8	2.2	0.94						2.11	2.1	2.09	0.7
	1.34	1.04	1.28	1.14						1.64	0.22	1.76	0.83						2.21	0.27	1.97	0.81						2.04	2.29	1.79	0.93						1.71	0.26	2.36	1.08						1.88	1.53	2.46	0.38
	1.67	1.43	1.1	1.72						1.69	0.38	1.73	1.36						1.73	1.28	2.92	0.97						1.26	0.17	2.05	1.05						1.16	0.76	1.79	0.81						2.16	1.34	2.33	1.44
	1.41	0.93	1.42	0.7						1.46	0.36	1.23	1.01						1.77	0.6	1.47	1.51						2.53	0.52	1.6	1.26						1.76	2.13	2.69	0.81						1.74	1.12	1.58	1.83
	1.9	0.26	1.67	0.79						1.3	1.28	2.2	1.19						1.61	1.26	1.04	0.22						2.35	1.41	1.8	0.98						1.36	0.2	1.58	0.43						2.09	1.68	2.7	1.35
	1.77	0.47	2.05	0.95						1.63	0.74	1.94	1.12						1.32	1.47	2.06	0.74						1.34	1.16	2.52	0.98						2.36	1.49	1.63	0.83						2.18	0.87	1.83	1.15
	1.83	1.59	1.79	1.1						1.35	1	1.13	1.12						1.92	0.41	1.68	1.54						1.13	0.76	1.51	0.92						1.82	1.39	2.17	0.57						2.16	0.43	1.87	0.56
	1.86	0.52	1.63	0.56						1.48	1.34	0.98	0.37						1.52	0.8	4.88	0.85						1.53	0.97	1.41	0.86						1.41	0.42	2.22	1.2						1.61	1.42	2.01	0.93
	1.99	0.65	1.42	0.78						2.09	0.29	1.58	0.82						1.74	0.69	2.2	0.57						1.4	1.09	1.79	1.33						1.67	0.66	2.22	1.02						1.75	1.46	2.31	0.73
	1.56	0.94	1.28	0.57						1.63	1.11	1.48	1.01						2.12	1.21	1.23	0.88						1.93	0.45	2.22	1.27						1.91	1.73	2.07	0.82						3.07	0.56	1.81	1.28
	2.12	0.27	1.55	0.61						1.46	0.35	1.27	0.8						1.58	1.17	1.11	1.1						2.22	1.05	2.05	0.97						3.56	0.18	1.9	1.01						1.49	1.28	2.04	0.66
	1.23	0.95	1.75	0.63						1.64	0.73	1.49	1.04						1.17	0.76	1.93	0.77						3.1	0.9	1.74	1.26						2.13	1.06	2.41	1.01						1.91	0.88	2.78	1.12
	3.38	0.5	1.88	0.55						0.89	1.06	1.03	0.97						1.97	1.67	1.15	0.96						1.3	0.68	1.74	0.82						1.31	0.78	1.6	1.59						2.4	0.99	1.85	0.88
	1.97	0.33	1.73	0.77						2.15	1.37	1.53	1.06						1.62	0.37	1.5	1.41						1.46	0.37	2.04	1.04						2	0.86	1.19	1.31						2.13	1.11	3.19	1.77
	3.19	1.72	2.21	0.55						1.27	1.54	2.7	1.16						2.38	1.97	1.54	1.28						2.16	1.57	2.32	0.75						1.34	0.83	2.77	0.82						2.46	0.96	2.46	1.51
	1.88	0.45	1.18	0.69						1.15	0.64	1.88	1.24						2.12	1.08	1.8	1.02						1.54	1.97	1.24	1.73						2.81	0.67	1.98	2.1						1.54	1.19	2.5	0.73
	1.31	0.91	3.38	1.27						1.77	1.69	1.56	1.07						2.36	1.79	2	0.94						2.17	1.23	2.77	1.26						1.62	1.54	1.46	1.02						1.34	0.61	2.19	0.44
	1.24	0.55	3.16	0.81						2.09	0.63	1.88	0.7						1.61	0.89	2.63	1						1.68	0.57	2.09	1.2						2.13	0.76	1.99	0.94						1.8	0.33	1.98	0.8
	1.45	0.25	1.8	1.25						1.27	0.98	1.35	1.72						1.26	2.47	1.73	1.14						1.39	1.02	2.24	0.82						2.73	0.64	1.35	1.27						2.85	0.84	1.52	0.26
	1.65	1.43	1.96	0.58						0.98	0.76	1.64	1.08						2.06	2.06	1.59	1.16						1.37	1.01	2.38	0.63						1.65	1.64	1.2	1.3						2.66	1.61	2.23	1.08
	1.79	0.23	1.38	1.14						1.56	1.21	2.59	0.89						2.01	0.18	1.37	0.93						1.98	0.62	1.52	0.77						1.76	0.87	1.71	0.88						2.44	1.83	2.01	0.83
	1.24	1.07	1.2	1.18						1.83	0.56	1.87	1.04						1.99	0.73	1.63	1.23						1.93	1.48	2.16	1.12						2.49	0.62	1.77	0.94						1.9	1.46	1.32	1.55
	1.53	1.2	2.09	1.28						1	0.92	2.39	0.57						1.36	1.18	2.01	1.05						1.57	0.29	1.99	0.66						2	0.97	1.72	0.97						1.82	0.79	1.9	0.9
	1.54	0.89	1.49	0.78						2.25	1.22	2.39	0.7						1.63	0.54	1.18	0.66						1.54	0.58	2.32	0.72						1.97	0.99	2.18	0.8						3.07	0.44	1.67	0.84
	2.14	1.86	2.21	0.93						1.48	1.28	2.07	0.88						1.57	0.41	2.25	0.91						1.33	0.8	1.5	0.85						1.77	0.74	2.88	0.85						2.1	0.78	2.13	1.19
	1.42	1.11	1.29	0.96						2.12	1.62	2	1.2						1.61	0.75	1.66	1.36						2.65	1.01	2.51	0.69						1.79	1.92	1.57	1.93						2.18	2.51	3.02	0.92
	1.86	0.56	1.98	1.59						1.83	0.84	0.79	0.74						2.09	1.39	2.2	1.11						1.34	1.63	1.96	1.14						1.94	1.23	1.87	1.34						2.96	1.04	1.86	1.42
	1.96	1.38	1.65	0.7						1.27	1.13	1.92	1.17						1.9	1.27	1.9	0.85						1.08	1.43	1.9	1.33						1.24	1.88	2.88	1.26						1.91	1.71	2.39	1.11
	1.9	0.19	1.81	0.9						1.53	0.9	2.66	0.59						1.38	0.75	1.66	1.61						1.44	0.54	1.75	0.9						2.22	0.48	1.97	0.73						2.11	1.53	2	0.59
	0.93	0.31	2.83	0.97						1.3	0.71	1.76	1.02						1.49	0.4	1.51	1.11						2.43	1.33	1.95	1.07						2.06	1.27	1.38	1.48						1.45	0.11	3.01	0.95
	1.39	0.65	1.47	0.96						1.48	0.92	1.41	1.14						1.53	1.58	1.98	0.75						1.3	1.46	1.55	1.03						1.64	0.54	1.56	0.68						2.19	1.35	2.95	1.12
	1.91	0.62	2.13	1.27						1.37	0.93	1.8	1						1.53	0.49	3.67	1.32						1.7	0.58	1.93	1.38						1.9	1.93	2.89	0.87						1.91	1.63	2.16	1.45
	1.36	1.63	1.33	0.88						1.35	1.03	1.35	0.48						1.44	1.26	2.02	0.62						1.2	1.29	1.56	0.79						2.04	1.34	2.31	0.49						1.87	1.18	2.46	1.31
	1.76	1.11	1.54	1.36						1.44	1.94	2.07	1.16						1.47	0.26	1.99	0.63						2.46	1.82	1.44	1.17						2.28	1.33	2.97	0.91						1.45	0.75	4.58	0.98
	1.88	1.54	1.3	1.21						2.31	1.31	1.91	1.17						1.56	0.37	2.22	1.12						1.66	0.28	1.27	1.5						1.58	0.82	1.69	1.17						2.57	0.5	2.19	0.86
	1.65	0.31	1.4	0.82						0.84	1.43	1.26	0.88						2.21	1.44	1.43	2.3						1.29	2.44	1.53	1.28						2.51	0.89	2.31	1.1						1.99	1.28	2	0.97
	1.69	1.36	1.31	0.71						1.81	1.8	1.11	0.85						1.23	1.62	2.22	1.39						1.91	1.01	1.91	0.85						2.88	0.9	2.12	1.16						2.79	1.45	2.26	0.92
	2.05	1.2	2.51	1.15						1.29	1.37	1.11	0.53						1.48	1.05	1.6	1						1.4	1.14	1.24	1.24						1.85	1.28	2.39	1.37						1.48	1.23	1.02	1.72
	1.72	1.58	1.85	0.91						1.28	1.34	1.35	1.1						1.41	1.77	2.06	0.68						1.44	0.36	1.68	0.75						1.63	1.89	2.02	0.93						2.01	1.89	2.73	1.34
	1.56	0.91	1.23	0.39						1.54	0.31	1.62	1.07						1.36	1.65	1.63	1.05						1.26	0.43	1.18	1.86						1.25	0.54	1.28	0.4						2	1.64	2.74	1.02
	1.16	1.56	1.8	0.76						1.6	0.2	1.63	1.2						1.5	0.21	1.06	0.49						2.2	1.23	1.68	1.09						1.79	1.02	1.98	0.76						3.48	0.3	2.14	1.05
	2.29	0.89	1.28	0.58						1.2	0.92	1.45	0.86						1.47	0.76	1.95	1.02						1.36	0.84	1.27	1.65						1.97	1.35	2.45	0.91						1.62	2.84	2.82	1.13
	1.78	0.6	1.22	0.93						1.83	0.34	1.53	0.97						2.16	1.53	1.87	0.75						1.87	0.96	1.87	0.65						2.06	1.35	1.43	1.67						1.04	1.18	1.98	1.5
	0.98	1.67	2.06	0.57						1.72	0.61	1.63	1.35						1.44	1.25	1.78	1.02						1.05	0.78	2.26	1.34						2.14	1.67	1.15	0.67						2.1	0.67	2.37	0.91
	1.65	0.88	1.96	0.82						1.35	0.91	1.46	1.13						1.51	1.64	1.58	0.71						1.84	0.66	2.23	1.39						1.82	1.34	1.29	1.01						2.63	1.43	1.43	1.49
	1.47	1.08	1.75	1.1						1.04	0.84	2.88	1.27						1.58	0.54	1.23	1.04						1.71	0.21	1.95	0.98						1.87	1.85	3.09	1.56						1.73	0.88	2.8	1.1
	1.44	0.94	1.58	0.52						0.87	0.29	1.32	0.66						2.05	0.21	1.22	0.52						3.61	0.17	1.94	1.1						1.98	1.63	1.78	1.04						2.21	1.4	1.12	1.16
	1.63	0.68	1.66	0.88						1.4	0.82	1.31	0.78						1.36	1.44	2.92	1.25						1.71	0.53	2.16	0.97						2.3	1.18	1.63	1.27						2.26	1.38	2.26	0.99
	0.97	1.28	1.4	1.62						1.08	1.71	1.12	1.11						2.32	20.43	2.89	0.99						2.19	0.94	1.4	0.99						2.61	0.88	2.34	1.02						2.05	1.96	1.86	1.05
	1.85	0.37	1.16	0.6						2.61	1.45	2.51	0.96						1.44	0.93	2.67	1.09						2.04	0.82	1.45	1.14						2.04	0.55	1.49	1.17						2.99	0.5	2.02	1.34
	1.61	1.36	1.64	0.82						1.47	0.63	1.67	0.73						1.77	1.94	1.12	1.05						1.28	1.42	1.81	0.79						2.18	0.82	2.3	0.81						2.09	1.19	2.11	0.83
	1.59	1.07	1.93	0.82						1.81	1.19	1.46	0.88						2.16	1.47	2.01	1.01						1.64	1.22	1.34	0.86						1.23	1.02	2.99	0.9						1.67	0.33	1.31	1.96
	1.62	0.85	1.65	0.6						1.22	1.05	1.79	0.81						2.2	0.2	1.76	0.7						1.26	0.36	1.46	1.17						1.97	1.54	2.11	0.86						1.39	0.3	1.8	1.08
	1.85	0.45	1.32	0.34						1.93	1.44	1.77	1.42						1.46	0.58	2.49	1.06						1.97	0.57	1.61	0.82						1.54	0.37	2.33	0.79						2.05	0.67	2.86	1.6
	2.38	1.03	1.65	1.43						1.72	1.27	1.12	0.66						1.38	0.89	1.96	1.2						1.35	0.45	1.49	1.16						2.31	1.24	1.41	0.76						2.15	1.39	1.99	1.14
	1.59	0.77	1.44	1.42						1.16	0.54	1.87	1.52						2.23	1.14	1.88	0.63						1.86	1.01	2.21	0.65						1.53	2.03	2.23	1.2						1.07	2.45	2.35	0.86
	1.26	1.26	1.83	0.85						2.07	1.31	1.13	0.57						1.45	1.22	1.38	1.05						1.38	0.21	2.14	0.57						1.7	0.92	2.2	0.92						2.18	1.91	2.38	1.24
	1.31	1.38	1.77	1.4						1.47	1.87	2.48	1.35						1.38	1.29	2.12	1.14						1.4	1.08	1.35	0.61						3.17	1.13	1.74	1.01						1.08	0.73	2.85	0.98
	1.17	1.19	1.75	0.83						1.76	1.13	2.03	1.02						1.23	1.64	1.12	0.46						1.61	0.23	1.25	1.05						1.2	0.94	1.69	0.52						1.43	0.88	2.45	0.73
	2.28	1.26	1.7	1.12						2.1	1.16	3.83	0.94						2.46	1.49	1.49	1.43						0.93	1.15	1.37	1.71						1.67	1.33	2.17	0.76						1.81	0.9	3.08	0.99
	1.23	1.1	1.87	1.11						1.34	1.48	1.69	1.15						2.18	0.4	2.02	1.14						1.16	0.99	1.59	0.48						1.4	1.7	3.52	0.78						1.35	1.19	2.5	0.7
	1.3	1.41	2.37	1						1.84	1.69	1.33	0.83						1.47	1.19	2.26	0.42						1.36	1.13	1.36	1.44						1.45	0.67	1.39	0.64						2.01	1.1	1.86	0.64
	1.12	0.47	2.15	0.69						1.95	1.16	1.95	0.91						1.94	2.01	1.98	0.82						2.03	1.48	1.72	1.59						1.64	1.6	1.79	0.97						1.58	0.52	2.95	0.68
	1.64	0.37	2.01	0.93						1.73	0.3	2.12	1.31						1.97	1.25	1.18	1.49						1.93	2.17	0.98	0.95						1.47	1.26	2.47	0.82						2.5	0.44	2.28	0.52
	2.37	0.7	1.58	1.07						1.67	1.01	1.52	1.29						2.08	1.22	2.24	0.72						2.06	0.96	1.55	0.94						1.71	1.24	1.97	0.44						2.13	1.6	2.03	0.75
	2.21	1.68	1.77	0.65						1.69	0.42	1.17	0.63						2.16	1.71	1.45	1.48						2.16	1.89	1.22	0.95						1.61	1.57	1.25	0.67						2.55	1.44	2.23	1.19
	1.71	0.38	1.64	1.58						1.66	0.33	2.54	0.9						1.3	1.63	1.37	1.26						2.93	0.99	1.54	1.43						1.79	0.68	2.94	1.02						1.64	1.51	2.04	1.47
	1.72	0.34	1.86	1.13						2.13	0.89	0.91	0.07						1.36	1.91	2.1	0.88						1.53	1.21	2.06	1.11						2.53	1.18	4.04	0.64						2.95	0.38	2.32	0.98
	1.8	0.19	1.42	0.91						1.9	0.56	1.21	0.5						2.41	0.87	1.23	0.72						1.7	1.41	1.25	1.03						1.61	1.2	2.4	1.03						3.33	0.8	1.75	1.14
	2.14	0.3	1.46	0.69						2.18	0.69	2.84	1.19						1.5	1.7	1.62	1.67						2.13	1.69	2.07	1.1						2.49	0.72	1.75	1.02						2.06	1.54	1.99	0.75
	2.12	0.75	1.21	1.73						1.92	1.17	1.75	1.11						1.53	1.03	1.55	0.99						1.18	0.88	1.45	0.83						1.48	0.26	1.55	1.01						1.98	1.32	2.27	0.89
	1.73	1.07	1.05	1.11						1.98	0.49	2.45	0.86						1.67	0.48	1.81	0.78						1.28	0.37	1.08	0.73						1.91	1.33	1.38	1.02						2.09	1.42	1.45	0.51
	1.96	1.02	1.88	2.3						1.43	1.38	1.84	0.76						1.34	0.98	1.46	1.18						1.42	0.46	2.09	1.04						1.26	1.07	1.97	0.92						2.16	1.3	2.72	1
	1.35	0.68	1.9	1.47						1.15	1.05	1.36	0.74						1.3	1.36	2.21	0.88						1.43	1.2	1.53	1.12						1.94	1.22	2.1	0.77						1.52	0.24	2.88	0.83
	2.35	1.85	1.61	1.1						1.12	2.84	1.42	1.64						2.39	1.86	1.62	1.25						2.74	1.02	1.89	0.67						2.3	1.2	1.86	0.89						2.25	1.59	1.54	0.73
	1.91	1.4	1.59	0.49						1.52	0.73	1.84	0.66						2.67	1.19	2.08	1.18						1.91	1.15	2.04	1.15						2.22	1.45	1.37	1.1						2.31	1.22	3.78	1.16
	1.64	1.24	2.96	1.02						1.47	1.04	1.33	1.01						1.5	0.59	1.45	1.38						1.34	1.06	1.34	0.76						1.82	1.22	1.88	0.92						1.19	0.41	1.37	1.14
	2.35	0.88	2.49	0.67						1.48	0.66	1.44	1.09						1.9	0.16	1.89	0.69						2.06	1.53	1.32	1.05						1.62	0.99	2.29	0.66						2.91	0.96	3.6	1.02
	1.58	1.45	1.51	0.98						1.04	1.29	1.51	1.09						1.29	2.24	1.17	0.37						2.19	1.17	2.38	0.87						2.62	1.66	1.55	1.37						2.82	1.16	2	0.66
	2.11	0.53	1.71	1.33						1.44	1.56	1.37	0.54						1.62	0.68	1.53	0.98						1.61	0.38	1.96	1.09						1.53	1.01	2.57	1.01						1.42	0.86	1.91	1.29
	1.47	2.24	1.64	0.77						1.29	0.87	1.91	0.6						1.49	0.94	0.91	1.61						1.74	1.52	1.35	1.3						1.44	1.14	2.36	0.67						2.27	0.84	2.85	0.6
	1.55	0.77	1.28	1						1.8	0.54	1.92	0.9						2.02	1.03	1.69	1.02						1.32	1.23	2.17	0.74						2.09	1.57	1.83	1.27						3.61	0.87	1.43	0.92
	1.76	0.62	2.41	0.67						1.69	0.9	1.15	0.54						0.87	0.63	1.3	0.26						1.05	1.3	2.25	0.99						1.51	0.55	1.62	1.21						2.21	1.05	2.18	1.27
	2.17	1.24	0.96	1.23						1.35	1.53	1.51	1.11						1.07	1.41	1.58	0.67						1.31	0.58	1.27	1.26						1.42	1.02	1.95	0.33						1.46	0.83	1.43	1.23
	2.01	1.39	1.43	0.79						1.28	0.56	1.05	1.51						2.52	0.19	2.88	0.91						2.79	0.5	1.09	1.06						2.77	0.97	1.27	0.59						2.36	1.32	2.13	1.38
	1.35	1.12	1.78	1.75						1.57	0.26	1.23	1.25						2.18	1.21	1.54	1.04						2.29	1.12	1.7	1.1						2.05	1.31	1.74	1.37						1.9	0.92	2.53	0.79
	3.08	0.82	1.32	0.47						1.18	0.69	1.6	0.91						1.18	1.53	1.7	1.29						1.6	0.81	2.98	1.23						1.07	0.92	1.94	0.95						2.68	0.6	3.3	0.71
	4.3	0.74	1.84	1.68						1.64	1.16	1.53	0.83						1.76	0.33	4.08	1.48						1.53	0.4	1.73	0.85						2.5	0.35	1.52	0.93						2.13	1.21	2.05	0.77
	3.77	0.44	1.43	0.35						1.56	0.39	1.14	0.45						1.48	0.88	1.26	1.49						2.87	0.79	1.31	0.99						2.35	0.86	1.71	1.09						1.34	0.9	2.14	0.98
	2.75	1.37	4.51	0.76						1.92	0.2	1.41	0.5						1.71	0.17	1.4	1.38						1.24	2.08	1.63	0.66						1.58	0.18	1.39	0.72						1.4	0.93	2.41	0.71
	1.06	1.03	2.29	0.54						1.38	1.28	1.79	0.98						1.14	2.01	1.98	0.98						2.44	1.01	1.88	0.94						1.88	1.8	5.66	0.93						2.98	0.48	2.67	0.67
	1.9	1.76	1.36	0.84						1.62	0.94	1.34	1.59						1.52	0.65	1.74	1.47						1.89	1.25	1.74	0.83						1.45	1.16	4.94	1.17						1.77	0.35	2.24	0.89
	1.04	0.79	1.82	0.83						1.55	3.97	1.46	1.38						1.74	0.6	1.77	1.1						2.99	0.75	1.83	1.22						1.61	0.31	2.71	0.87						2.39	1.54	2.06	1.07
	1.74	0.31	1.82	0.83						1.43	0.76	1.6	1.11						1.47	0.68	2.02	0.96						2.03	1.71	2.14	0.78						1.6	0.37	2.78	0.7						2.16	1.06	3.38	0.55
	1.06	0.77	1.85	0.66						1.76	2.11	1.23	0.88						1.66	1.4	1.28	0.97						1.27	1.63	1.7	1.37						2.06	1.2	2.44	0.85						1.62	0.62	1.83	1.1
	2.11	2.4	1.66	0.58						1.06	1.88	1.71	1.37						1.74	1.7	0.94	0.98						2.04	1.61	1.25	1.57						1.99	1.5	1.58	0.57						2.3	1.15	1.81	0.58
	2.01	0.48	1.53	1.63						1.99	1.1	1.59	0.86						1.7	0.32	1.87	0.86						1.15	1.74	2.43	1.28						1.93	1.38	1.5	1.1						1.68	0.68	2.52	1.15
	1.85	0.94	1.87	0.76						1.72	1.31	3.54	1.3						2.57	1.3	2.25	1.22						1.11	1.73	2.16	0.88						1.55	1.59	1.97	1.06						2.03	1.8	1.34	1.19
	1.84	0.52	1.73	1.45						1.55	0.34	1.7	1.47						1.66	0.67	1.5	1.16						1.76	0.19	2.23	1.37						1.79	0.41	2.64	1.25						1.68	1.37	2.59	0.71
	1.27	1.95	0.98	0.42						0.98	2.71	2.1	0.91						1.39	1.5	1.44	1.34						2.17	0.81	1.56	0.36						1.58	1.34	1.79	0.95						2.42	1.36	1.69	0.86
	1.51	0.78	1.12	0.53						1.53	1.84	1.42	1.24						1.4	0.7	1.44	0.04						1.78	1.52	1.3	0.83						2.17	0.29	1.23	0.81						1.41	0.46	1.81	0.89
	1.72	1.13	1.74	0.95						1.83	0.8	1.42	1.41						1.43	1.37	2.45	1.16						2.02	0.4	2.38	1.17						2.26	2.02	1.62	0.76						2.14	1.02	2.26	0.82
	1.42	1.26	1.26	0.89						1.96	0.5	1.13	1.24						2.36	1.07	1.42	0.99						2.48	1.17	1.79	1.05						2.21	1.61	2	1.31						2.03	1.06	3.53	0.88
	1.84	0.26	1.64	0.8						2.81	0.86	1.84	1.52						1.26	1.11	1.75	1.26						1.9	1.4	2.59	1.28						2.21	0.9	1.85	1.09						1.53	0.35	3.18	0.69
	2.13	1.19	1.76	1.04						1.93	0.89	2.09	0.84						1.98	0.44	2.33	0.91						1.03	0.84	2.41	1.3						1.88	1.31	1.42	0.93						1.76	1.35	2.06	0.98
	1.51	0.73	2.2	1.03						1.53	0.32	1.6	0.75						1.35	0.85	1.97	1.2						1.23	0.72	1.91	0.77						1.92	1.07	2.55	0.88						2.09	0.89	1.85	0.67
	2.23	0.69	1.55	1						1.37	1.28	2.49	1.1						2.5	1.42	1.78	1.06						1.34	1.07	1.58	1.09						2.17	1.35	1.59	1.48						2.23	2.08	1.8	0.77
	1.53	0.86	1.52	1.15						1.07	1.73	2.19	1.11						1.55	1.16	1.9	0.89						2.04	1.91	1.97	1.33						1.72	0.18	2.22	1.03						1.74	0.58	2.07	0.79
	2.05	0.45	1.36	1.09						5.15	0.6	1.41	1.57						1.73	0.18	1.46	0.96						2.21	1.43	1.51	1.02						1.48	1.32	1.99	1.4						2.2	0.5	2.33	1.29
	1.46	1.62	1.49	1.07						1.45	1.13	1.82	0.7						1.43	1.75	1.5	1.15						1.66	1.17	2.51	0.87						2.23	1.32	1.57	1.11						2.77	0.9	2.16	1.43
	2.25	1.29	1.86	0.75						2.63	1.33	2.45	1.07						1.25	1.18	1.48	0.9						2.21	1.33	1.58	0.76						3.14	0.26	1.53	0.33						1.93	0.45	2.32	1.27
	1.18	1.99	2.18	0.8						1.85	1.1	2.84	1.58						1.36	1.24	2.53	1.09						2.04	0.86	2.23	0.9						1.05	0.43	1.89	0.81						1.24	0.68	2.05	0.75
	1.72	0.96	1.66	0.77						0.98	1.75	4.43	1.05						1.41	1.77	2.32	0.68						1.5	1.48	2.31	0.9						1.64	0.15	1.78	0.92						2.54	1.75	2.15	0.64
	1.72	1.07	2.31	0.75						2.06	0.55	1.66	1.49						1.74	1.1	1.66	1.13						1.13	1.48	1.32	0.65						1.55	0.44	1.34	0.44						2.38	1	2.55	0.87
	2.15	0.55	2.03	1.09						1.36	1.97	1.26	1.35						1.76	0.22	1.5	0.83						1.43	0.75	2.65	1.35						2.04	1.66	0.95	0.82						1.94	1.06	2.44	0.8
	1.64	0.47	1.76	0.82						1.16	0.99	2.22	1.08						1.92	0.73	1.78	1.12						1.7	1.3	0.93	0.41						1.71	2.57	2.12	1						1.73	1.28	2.42	1.12
	0.93	1.54	1.09	0.87						2.04	1.14	1.56	0.74						1.68	0.93	1.66	1.9						1.42	0.59	1.15	1.12						1.07	1.23	1.79	0.77						1.7	1.67	2.62	1.06
	2.24	0.31	1.19	1.55						1.43	0.67	1.26	1.59						1.37	1.67	2.3	1.1						2.8	0.9	1.79	0.76						2.07	2.09	1.79	0.97						2.22	1.27	2.35	1.37
	2	1.69	1.77	0.79						2.19	0.9	1.62	0.82						1.73	0.38	1.15	2.06						1.47	0.28	1.82	1.08						1.44	0.34	1.85	0.83						1.23	1.38	1.23	0.92
	1.68	1.05	1.54	0.83						1.73	0.62	1.89	1.23						1.94	1.14	1.12	0.43						1.75	0.78	1.27	1.01						1.74	1.25	1.95	0.42						1.32	1.09	2.62	0.45
	1.62	0.86	1.79	1.15						1.17	0.85	1.66	0.92						1.92	0.78	1.26	1.27						1.6	0.97	2.1	1.03						2.79	0.77	1.77	1.51						1.69	0.81	2.35	0.7
	1.79	0.79	1.2	1.06						1.56	0.26	2.11	1.06						2.05	1.64	1.98	1.15						2.67	1.33	1.85	1.25						2.57	1.06	1.56	0.79						1.94	1.86	1.94	1.34
	3.58	0.98	1.23	0.71						1.37	0.65	2.12	0.92						1.92	1.31	2.01	0.78						2.42	1.23	1.92	0.9						1.4	1.11	2.91	0.86						2.45	0.97	2.01	1.13
	1.9	0.9	1.27	1.22						1.91	0.59	1.16	0.86						1.84	1.34	1.3	1.13						1.91	0.16	1.91	0.88						1.36	1.83	1.94	0.77						2.26	1.96	1.57	0.89
	1.43	0.86	1.1	1.24						1.46	0.47	1.78	1.22						1.47	0.66	1.5	1.01						2.85	1.03	1.78	0.56						1.15	0.32	1.95	0.61						1.84	0.48	2.74	0.92
	1.67	0.71	2.47	1.19						1.58	0.62	1.41	0.71						1.86	1.19	2.24	0.85						2.38	1.15	2.24	0.89						1.22	0.59	1.75	0.84						2.08	1.41	1.76	0.49
	2.69	1.5	1.71	1.39						0.99	1.25	1.21	0.81						1.53	0.15	2.49	0.73						1.83	1.02	1.8	1.19						1.42	0.92	2.16	1.03						2.49	1.23	1.37	0.71
	1.68	1.65	1.89	1.18						1.71	0.44	1.81	0.91						2.35	1.15	1.53	0.62						2.14	1.39	1.36	1.05						1.61	0.23	1.8	0.6						1.63	0.9	2.57	0.88
	1.6	1.92	3.05	1.3						1.77	0.31	1.72	0.96						1.44	1.33	1.8	0.75						1.95	0.69	1.55	0.57						2.49	1.63	2.39	1.09						2.6	1.1	2.2	0.49
	1.73	0.64	1.88	0.78						1.01	0.79	1.79	1.31						1.71	0.38	1.95	0.77						1.33	0.24	1.67	1.78						2.48	1.18	2.27	0.87						1.85	1.28	2.77	0.7
	1.96	0.31	1.25	1.15						1.6	0.72	1.82	0.94						1.23	1.15	1.75	1.35						1.44	0.4	2.02	1.12						1.84	1.97	1.79	1.65						2.49	0.76	2.58	0.91
	2.05	0.41	1.87	0.77						1.33	1.6	1.7	0.81						1.99	2.08	1.83	0.84						5.67	2.51	2.15	0.89						2.17	1.2	2.15	0.92						1.7	1.18	1.58	0.62
	2.23	1.79	1.73	1.29						1.4	1.66	1.37	0.86						1.47	1.03	2.24	0.78						1.6	0.2	1.96	0.72						1.68	1.9	1.8	1.41						2.25	1.66	2.21	0.58
	1.41	0.76	1.22	0.9						1.28	1.1	1.6	0.79						1.57	0.37	1.9	1.27						1.68	1.17	2.02	0.58						1.98	2.27	1.64	0.89						1.57	1.89	2.82	0.65
	1.51	0.85	1.69	0.93						1.99	0.63	2.24	0.91						1.45	0.82	1.34	0.54						2.17	1.14	1.62	1.01						2.53	1.05	1.71	1.11						2.14	1	3.05	1.08
	2.03	1.03	1.88	0.78						1.38	0.87	1.45	0.76						2.27	1.34	1.91	0.8						1.7	0.2	2	0.54						7.89	0.66	2.1	1						1.54	0.41	2.87	1.38
	1.64	0.73	1.53	1						1.74	1.24	1.98	0.84						1.59	1.16	1.26	0.55						2.09	1.02	1.51	0.7						1.89	1.14	1.39	0.94						1.88	0.37	1.64	0.72
	1.24	0.41	2.03	1.22						1.36	0.31	1.48	1.45						2.15	1.03	2.01	1.17						2.11	1.43	2.27	0.85						2.54	0.22	1.52	1.6						0.99	1	3.02	0.81
	1.57	1.19	1.85	1.13						1.86	0.55	1.3	0.69						1.82	1.01	1.3	1.24						1.61	0.93	2.02	1.01						1.6	0.94	2.51	0.95						2.43	0.46	1.82	1.03
	1.59	0.8	1.7	1.15						1.45	0.75	1.41	0.57						1.55	0.53	1.19	1.07						1.18	1.54	2.2	0.91						2.32	0.28	1.58	0.59						1.44	1.43	1.4	0.91
	1.67	0.54	1.32	1.27						1.51	1.16	1.84	1.11						2.29	0.64	1.39	0.62						1.45	0.49	1.8	0.97						1.44	0.88	2.53	1.44						2.22	0.91	2.66	0.64
	2.1	1.14	2.34	0.98						1.39	1.68	1.24	0.51						1.78	0.81	2.15	0.88						1.89	0.2	1.62	1.11						1.59	1.1	0.99	0.44						2.13	0.74	2.47	1.19
	1.55	0.55	1.16	0.66						1.96	0.6	0.95	1.02						1.31	1.38	1.37	1.17						1.52	0.52	2.23	0.84						1.45	1.02	3.59	0.64						2.41	1.02	2.69	1.01
	1.2	1.3	2.48	1.21						1.75	0.45	1.92	0.7						1.62	0.88	1.38	0.75						1.56	0.16	1.71	1.16						2.21	1.04	1.43	1						2.32	0.32	2.57	0.75
	1.36	1.62	1.77	1.16						1.41	0.78	2.14	0.98						2.1	1.09	1.69	1.31						1.54	0.32	2.54	1.12						1.19	1.79	2.45	1.3						2.1	1.87	1.76	1.15
	2.04	0.62	1.14	1.24						1.49	0.86	1.55	0.64						2.25	1.07	1.53	1.8						2.18	1.34	2.33	1.16						2.15	1.19	2.36	1.11						1.74	1.42	2.01	1.36
	1.38	1.21	1.41	0.68						2.16	1.37	1.96	1.13						1.7	0.21	1.5	0.72						2.07	1.02	1.95	0.94						1.84	1.07	2.21	0.69						2.14	0.27	1.78	1.47
	1.69	0.71	1.39	1.24						1.5	1.05	1.49	0.9						1.3	1.87	1.7	0.96						1.41	0.24	2.39	1.51						1.84	1.9	2.21	1.13						2.82	0.73	3.31	1.04
	1.22	1.39	1.68	0.62						1.68	1.43	1.46	1.22						2.04	0.88	1.46	1.14						1.98	1.53	2.51	0.99						2.03	0.92	1.8	0.77						1.68	1.98	1.48	0.96
	1.43	1.31	1.92	0.83						2.33	1.5	2.06	0.85						1.36	1.03	1.89	0.81						1.62	1	1.85	1.27						1.22	0.99	1.75	1.27						2.06	1.12	1.49	0.57
	1.65	1.08	1.91	1.33						1.93	0.13	1.58	1.12						2.56	1.76	1.47	0.95						1.55	1.01	1.55	1.09						1.67	1.24	3.28	1.17						2.23	1.37	3.01	1.45
	1.38	1.93	3.16	1.2						1.47	0.86	1.39	1.03						1.76	0.75	1.58	1.09						1.3	1.1	2.17	0.63						1.47	0.13	1.28	0.74						1.42	0.3	1.93	1.26
	1.58	0.93	3.88	1.45						1.28	1.14	1.45	1.19						1.78	0.32	2.03	0.77						1.94	0.93	1.59	1.26						1.43	0.93	1.54	1.33						2.85	0.86	1.83	1.31
[truncated: 27,443 more rows]
[truncated: 36 more columns]

## Sheet: Figure. 7G
	Figs. 5C, 7G
	Host strain	reporter plasmid	Growth condition	[aTc] ng·ml-1	V* (µm3)	cell counts	Population averaged cell volume (µm3)	Cellular oriC number	Initiation volume ( µm3)	oriC number at initiation	Cell volume at initiation (Vi (µm3))	Douobling Time (min)
	Rhns2	Psyn66-lacZ	M1	0	1.5	28011	2.06	3.96455	0.749632	2	1.49926	32
				4	3.1	23414	2.27	4.35786	0.751498	4	3.00599	31
				8	2.9	22541	2.44	4.88168	0.7211	4	2.8844	31
				16	2.7	12639	2.59	5.67155	0.658829	4	2.63531	31
				50	2.5	12937	2.84	6.32719	0.647563	4	2.59025	32
			M6	0	2	11682	1.71	2.3417	1.05351	2	2.10703	48.59
				4	1.8	11720	2.9	2.45284	1.7057	2	1.7057	47.06
				8	1.7	11590	1.72	2.66381	0.931538	2	1.86308	47
				16	1.6	18122	1.82	3.15609	0.83195	2	1.6639	49.3
				50	1.5	8449	1.93	3.51559	0.792015	2	1.58403	51.35
	RdnaA2		M6	2	3.1	20686	2.18	3.99908	0.786449	4	3.14579	36
				5	2.7	13015	2.33	5.03721	0.66733	4	2.66932	33
				8	2.6	19719	2.31	5.67877	0.586857	4	2.34743	33
	MGCL1		M1		2.9	15898	3.05	6.58	0.668726	4	2.67491	30
			M2		3.2	11227	2.89	5.28842	0.788399	4	3.1536	32
			M3		3.3	8800	2.41	4.30169	0.808263	4	3.23305	36
			M6		1.6	20160	1.93	3.48597	0.798746	2	1.59749	41
			M12		1.6	10919	2.18	3.71762	0.845991	2	1.69198	45
			M13		1.7	20814	1.55	2.53619	0.881706	2	1.76341	57
			M18		1.7	18131	1.52	2.54047	0.863187	2	1.72637	66
